# Supplementary material for: A bidirectional switch in the Shank3 phosphorylation state biases synapses toward up- or downscaling
Source: eLife. 2022 Apr 26;11:e74277. doi: 10.7554/eLife.74277 (PMC9084893; doi:10.7554/eLife.74277)
Supplement: Figure 1—source data 1. [file elife-74277-fig1-data1.xlsx]

## Sheet: Legend
S1A. TTX_Proteome	Global proteome quantification and linear model analysis results for TTX treated samples
Primary_accession	Uniprot accession number for the primary matching protein
Redundant_accessions	Uniprot accession numbers for entries that cannot be unambiguously distinguidhed with the current peptide matched data
Gene	Gene symbol
Protein_name	Protein name from Uniprot database
Species	Species
Num_unique_peptides	Number of unique peptides identified
Percent_coverage	Percent of the total protein seuqence covered by the identified peptides
Protein_score	Spectrum Mill protein score
Rep1_5min	Log2 TMT reporter ion intensity ratio between the experimental samples and the control from the corresponding replicate
Rep1_1hr
Rep1_7hr
Rep1_24hr
Rep2_5min
Rep2_1hr
Rep2_7hr
Rep2_24hr
P_value	F-test nominal p-value indicating differential abundance across the timecourse.
Adjusted_p_value	False-discovery adjusted p-values from the above test
S1B. TTX_Phosphoproteome	Phosphoproteome quantification and linear model analysis results for TTX treated samples
ID	Unique identifier as Gene_Accession_Phosphosite_NumSites_NumLocalizedSites_FirstAA_LastAA
Primary_accession	Uniprot accession number for the primary matching protein
Redundant_accessions	Uniprot accession numbers for entries that cannot be unambiguously distinguidhed with the current peptide matched data
Gene	Gene symbol
Protein_name	Protein name from Uniprot database
Phosphosite	Position of modified phosphosites
Peptide_sequence	Sequence of the identified peptide. Modified sites are indicated as lowercase
Species	Species
Peptide_score	Spectrum Mill peptide score
Ambiguous_ptm_localization	Logical value indicating whether the phosphosite is ambiguously localized to multiple residues
Rep1_5min	Log2 TMT reporter ion intensity ratio between the experimental samples and the control from the corresponding replicate
Rep1_1hr
Rep1_7hr
Rep1_24hr
Rep2_5min
Rep2_1hr
Rep2_7hr
Rep2_24hr
P_value	F-test nominal p-value indicating differential abundance across the timecourse.
Adjusted_p_value	False-discovery adjusted p-values from the above test
S1C. BIC_Proteome	Global proteome quantification and linear model analysis results for BIC treated samples
Primary_accession	Uniprot accession number for the primary matching protein
Redundant_accessions	Uniprot accession numbers for entries that cannot be unambiguously distinguidhed with the current peptide matched data
Gene	Gene symbol
Protein_name	Protein name from Uniprot database
Species	Species
Num_unique_peptides	Number of unique peptides identified
Percent_coverage	Percent of the total protein seuqence covered by the identified peptides
Protein_score	Spectrum Mill protein score
Rep1_5min	Log2 TMT reporter ion intensity ratio between the experimental samples and the control from the corresponding replicate
Rep1_1hr
Rep1_7hr
Rep1_24hr
Rep2_5min
Rep2_1hr
Rep2_7hr
Rep2_24hr
P_value	F-test nominal p-value indicating differential abundance across the timecourse.
Adjusted_p_value	False-discovery adjusted p-values from the above test
S1D. BIC_Phosphoproteome	Phosphoproteome quantification and linear model analysis results for BIC treated samples
ID	Unique identifier as Gene_Accession_Phosphosite_NumSites_NumLocalizedSites_FirstAA_LastAA
Primary_accession	Uniprot accession number for the primary matching protein
Redundant_accessions	Uniprot accession numbers for entries that cannot be unambiguously distinguidhed with the current peptide matched data
Gene	Gene symbol
Protein_name	Protein name from Uniprot database
Phosphosite	Position of modified phosphosites
Peptide_sequence	Sequence of the identified peptide. Modified sites are indicated as lowercase
Species	Species
Peptide_score	Spectrum Mill peptide score
Ambiguous_ptm_localization	Logical value indicating whether the phosphosite is ambiguously localized to multiple residues
Rep1_5min	Log2 TMT reporter ion intensity ratio between the experimental samples and the control from the corresponding replicate
Rep1_1hr
Rep1_7hr
Rep1_24hr
Rep2_5min
Rep2_1hr
Rep2_7hr
Rep2_24hr
P_value	F-test nominal p-value indicating differential abundance across the timecourse.
Adjusted_p_value	False-discovery adjusted p-values from the above test
S1E. Bidirectional phosphosites	Phosphosites with significant regulation in response to BIC and TTX treatment and opposite directions of response
ID	Unique identifier as Gene_Accession_Phosphosite_NumSites_NumLocalizedSites_FirstAA_LastAA
Primary_accession	Uniprot accession number for the primary matching protein
Gene	Gene symbol
Protein_name	Protein name from Uniprot database
Phosphosite	Position of modified phosphosites
Peptide_sequence	Sequence of the identified peptide. Modified sites are indicated as lowercase
TTX_direction	Direction of change in response to TTX treatment (sign of the average fold-change across all measured timepoints)
BIC_direction	Direction of change in response to BIC treatment (sign of the average fold-change across all measured timepoints)
TTX_adjusted_p_value	F-test FDR adjusted p-value for TTX treatment
BIC_adjusted_p_value	F-test FDR adjusted p-value for BIC treatment

## Sheet: S1A. TTX_Proteome
								log2 TMT ratios to control
Primary_accession	Redundant_accessions	Gene	Protein_name	Species	Num_unique_peptides	Percent_coverage	Protein_score	Rep1_5min	Rep1_1hr	Rep1_7hr	Rep1_24hr	Rep2_5min	Rep2_1hr	Rep2_7hr	Rep2_24hr	P_value	Adjusted_p_value
Q3UHF7	Q3UHF7|A0A087WQF9	Hivep2	Transcription factor HIVEP2	MOUSE	10	4.1	89.04	-0.047	0.095	0.718	1.277	0.016	0.34	0.805	1.179	1.15723e-05	0.11158
Q3TYD6	Q3TYD6	Lmtk2	Serine/threonine-protein kinase LMTK2	MOUSE	29	28.4	420.12	-0.096	-0.06	-0.202	-0.695	-0.011	0.029	-0.174	-0.603	8.70666e-05	0.419748
Q62443	Q62443	Nptx1	Neuronal pentraxin-1	MOUSE	18	49	271.8	0.062	0.02	0.487	0.694	0.046	0.02	0.277	0.73	0.000166479	0.474469
A2A7F7	A2A7F7|F6Z4F8|Q9WU20|F7BGN3	Mthfr	Methylenetetrahydrofolate reductase	MOUSE	3	3.4	24.35	0.056	0.193	0.188	0.568	0.075	0.136	0.144	0.588	0.000196834	0.474469
P52019	P52019|Q3TSS7	Sqle	Squalene monooxygenase	MOUSE	19	35.6	233.95	0.026	0.065	-0.069	-0.452	0.092	0.028	-0.009	-0.505	0.000381513	0.538326
Q8R1Y2	Q8R1Y2|D3YWS4|D3Z3S8	Bmerb1	bMERB domain-containing protein 1	MOUSE	14	66.9	176.04	0.078	-0.047	0.135	0.453	0.06	-0.054	0.081	0.462	0.000390819	0.538326
E9Q7C2	E9Q7C2|Q5RJY2|E9Q7E5	G2e3	G2/M phase-specific E3 ubiquitin-protein ligase	MOUSE	2	2.4	13.3	0.469	0.565	0.468	0.424	0.586	0.521	0.388	0.446	0.000281909	0.538326
S4R2K9	S4R2K9|S4R1S2|S4R2S8|S4R187|S4R2C1|S4R1X7|S4R165|S4R2J6|S4R208|S4R229|W4VSQ0|Q3UVY0|S4R1U4|S4R162	Ank3	Ankyrin-3 (Fragment)	MOUSE	147	64.9	2061.36	0.328	0.215	0.443	0.42	0.343	0.419	0.605	0.524	0.00098087	0.630503
Q61823	Q61823|A0A494BA05	Pdcd4	Programmed cell death protein 4	MOUSE	17	46.6	253.86	0.03	0.316	0.38	0.852	-0.243	-0.115	0.273	0.71	0.000813787	0.630503
A0A2R8W6P6	A0A2R8W6P6	Gfus	GDP-4-keto-6-deoxy-D-mannose-3,5-epimerase-4-reductase	MOUSE	14	57.4	201.26	-0.511	-0.386	-0.575	-0.324	-0.432	-0.539	-0.721	-0.205	0.000856829	0.630503
Q01237	Q01237|F2Z470|F6X166|F7CA39	Hmgcr	3-hydroxy-3-methylglutaryl-coenzyme A reductase	MOUSE	18	25.3	228.01	0.142	0.336	0.03	-0.565	-0.108	0.102	-0.047	-0.551	0.000797976	0.630503
O35926	O35926	Cdk5r2	Cyclin-dependent kinase 5 activator 2	MOUSE	11	33.6	132.22	0.016	-0.209	-0.31	-0.687	-0.021	-0.035	-0.083	-0.557	0.000960237	0.630503
E9Q9F1	E9Q9F1|Q9JK45|G3UYG5|G3UYP4|G3UZ84	Kcnq5	Potassium voltage-gated channel subfamily KQT member 5	MOUSE	9	8.5	93.69	0.135	0.009	-0.153	-0.499	0.046	0.025	-0.04	-0.469	0.000567984	0.630503
A0A0A0MQM7	A0A0A0MQM7|O08746|A0A2I3BRF3|A0A2I3BRV5	Matn2	Matrilin-2	MOUSE	2	2.8	23.81	-0.016	0.172	0.091	0.492	-0.019	0.04	0.025	0.53	0.000610398	0.630503
Q9JLC6	Q9JLC6	Tef	Thyrotroph embryonic factor	MOUSE	2	4.6	14.25	-0.034	-0.14	0.525	0.312	-0.168	-0.088	0.407	0.49	0.00083359	0.630503
Q80XU3	Q80XU3|A0A087WRY3	Nucks1	Nuclear ubiquitous casein and cyclin-dependent kinase substrate 1	MOUSE	5	26.9	69.52	0.063	-0.2	-0.12	0.552	-0.145	-0.083	0.08	0.636	0.00145945	0.776164
F6Y6A6	F6Y6A6|A0A140LHB6|Q8R0A6	Vstm2a	V-set and transmembrane domain-containing protein 2A	MOUSE	4	12	44.83	0.018	-0.111	-0.29	-0.5	0.012	0.072	-0.123	-0.477	0.00151907	0.776164
Q8CEF1	Q8CEF1	Fem1c	Protein fem-1 homolog C	MOUSE	5	7.1	31.8	0.54	0.622	0.86	0.547	0.329	0.285	0.667	0.653	0.00160996	0.776164
P49817	P49817|D3Z148|H3BKG0	Cav1	Caveolin-1	MOUSE	2	9.5	17.36	0.058	0.128	-0.136	-0.451	0.078	0.053	0.034	-0.631	0.00138693	0.776164
P04919	P04919	Slc4a1	Band 3 anion transport protein	MOUSE	2	1.7	15.62	0.365	0.399	-0.096	0.247	0.176	0.234	-0.289	0.164	0.00154235	0.776164
Q8BI84	Q8BI84|A0A0R4J2D3|A0A0A6YX61	Mia3	Transport and Golgi organization protein 1 homolog	MOUSE	81	42.8	1029.23	-0.002	0.106	-0.113	-0.318	-0.01	0.052	-0.058	-0.328	0.00242472	0.865893
Q52KF7	Q52KF7	Dlg3	Disks large homolog 3	MOUSE	50	63	744.01	-0.246	-0.013	-0.384	-0.196	-0.401	-0.019	-0.418	-0.387	0.00241481	0.865893
Q64299	Q64299	Ccn3	CCN family member 3	MOUSE	14	46.8	209.82	-0.041	-0.126	-0.077	-0.733	-0.059	0.024	0.058	-0.428	0.00211989	0.865893
Q80WQ6	Q80WQ6	Rhbdf2	Inactive rhomboid protein 2	MOUSE	3	4.2	19.93	0.028	-0.021	0.172	0.349	-0.035	0.066	0.182	0.442	0.00222982	0.865893
Q9QUN9	Q9QUN9	Dkk3	Dickkopf-related protein 3	MOUSE	5	17.1	61.1	-0.014	-0.094	0.169	0.417	0.02	0.103	0.412	0.525	0.00211109	0.865893
Q641K5	Q641K5|F6XZX4	Nuak1	NUAK family SNF1-like kinase 1	MOUSE	4	6	38.81	-0.009	-0.132	0.306	0.552	0.072	0.26	0.592	0.715	0.00192045	0.865893
A2AX52	A2AX52	Col6a4	Collagen alpha-4(VI) chain	MOUSE	4	2.3	18.79	-0.194	-0.51	-0.436	-0.583	-0.384	-0.353	-0.625	-0.561	0.00229583	0.865893
Q60848	Q60848	Hells	Lymphocyte-specific helicase	MOUSE	3	2.6	29.08	-0.227	0.192	0.04	-0.358	-0.379	-0.052	-0.065	-0.404	0.00252752	0.870369
A2AU37	A2AU37|R4GML2	Rad21l1	Double-strand-break repair protein rad21-like protein 1	MOUSE	2	3.6	13.67	0.55	0.465	0.936	0.492	0.285	0.212	0.95	0.903	0.00358829	0.903158
G3X9N3	G3X9N3	Pnmal2	PNMA-like 2	MOUSE	15	28.7	202.01	-0.044	0.026	-0.02	0.346	-0.009	-0.01	0.089	0.346	0.00343701	0.903158
P52189	P52189|Q8R435|B1ATI1|P35561|P52187|Q8JZN3	Kcnj4	Inward rectifier potassium channel 4	MOUSE	9	25.6	137.73	-0.033	-0.049	-0.123	-0.384	-0.035	-0.083	-0.095	-0.332	0.00294554	0.903158
Q9D428	Q9D428	GOLGA7B	Golgin subfamily A member 7B	MOUSE	5	41.3	81.24	-0.11	-0.093	-0.212	-0.471	0.017	0.009	-0.017	-0.362	0.00352617	0.903158
Q9WTP2	Q9WTP2	Spry4	Protein sprouty homolog 4	MOUSE	5	25.3	65.8	-0.012	-0.043	-0.096	-0.483	0.228	0.002	0.139	-0.379	0.00342772	0.903158
O88829	O88829|A0A0R4J1J3|A0A0U1RPP1|A0A0U1RNK2	St3gal5	Lactosylceramide alpha-2,3-sialyltransferase	MOUSE	5	11.1	56.42	0.041	0.251	-0.143	-0.235	0.04	0.118	-0.093	-0.262	0.0036531	0.903158
P61208	P61208	Arl4c	ADP-ribosylation factor-like protein 4C	MOUSE	4	25.5	52.8	0.112	0.043	-0.123	-0.311	0.052	0	-0.101	-0.27	0.00351618	0.903158
Q6TEK5	Q6TEK5|Q0VGU5|A0A0M3HEP8|A0A0J9YUN6	Vkorc1l1	Vitamin K epoxide reductase complex subunit 1-like protein 1	MOUSE	4	20.4	45.37	0.188	0.368	-0.142	-0.158	0.119	0.177	-0.096	-0.342	0.00304054	0.903158
Q3U309	Q3U309|A0A0R4J062|O08983|E9Q045|E9PYL0	Hps1	Hermansky-Pudlak syndrome 1 protein homolog	MOUSE	2	2.1	15.48	-0.29	-0.214	-0.664	-0.385	-0.153	0.042	-0.44	-0.13	0.00297015	0.903158
E9QPR6	E9QPR6|Q5U405|P00760	Tmprss13	Transmembrane protease serine 13	MOUSE	2	2.7	14.31	-0.506	0.024	-0.688	-0.407	-0.563	-0.266	-0.68	-0.884	0.00277366	0.903158
Q7TN37	Q7TN37|A0A1B0GS49	Trpm4	Transient receptor potential cation channel subfamily M member 4	MOUSE	2	1.2	13.84	0.039	0.061	0.095	0.449	-0.057	-0.018	-0.09	0.326	0.00315448	0.903158
E9PUC4	E9PUC4|Q6NSW3|A0A0R4J1Y6	Sphkap	A-kinase anchor protein SPHKAP	MOUSE	78	61.1	1144.66	0.112	-0.136	-0.071	-0.489	-0.018	0.049	-0.03	-0.408	0.00420514	0.96298
Q8K0C4	Q8K0C4	Cyp51a1	Lanosterol 14-alpha demethylase	MOUSE	25	59.8	374.45	-0.146	-0.036	-0.251	-0.501	0.173	0.188	-0.089	-0.401	0.00468798	0.96298
Q8BTG7	Q8BTG7|A0A1D5RMH3|A0A1D5RM17	Ndrg4	Protein NDRG4	MOUSE	14	61	257.19	0.165	0.062	0.332	0.512	-0.063	-0.059	0.051	0.419	0.00491347	0.96298
P16014	P16014	Chgb	Secretogranin-1	MOUSE	20	31.4	245.74	-0.077	-0.196	0.11	0.463	0.164	0.189	0.435	0.66	0.00489964	0.96298
O35668	O35668|G3UYE4|G3UZT4|G3UXU7	Hap1	Huntingtin-associated protein 1	MOUSE	20	34.7	238.29	0.057	-0.004	-0.077	0.364	-0.123	-0.083	-0.065	0.284	0.00509671	0.96298
P26339	P26339	Chga	Chromogranin-A	MOUSE	18	32.6	201.27	0.194	-0.162	0.316	0.573	-0.095	0.1	0.34	0.63	0.00542926	0.96298
Q8K209	Q8K209|A0A1D5RLE2|A0A1D5RLN4|A0A1D5RLK9|A0A1D5RLB9|A0A1D5RLF7|A0A1D5RM68|A0A1D5RLH8|A0A1D5RME3	Adgrg1	Adhesion G-protein coupled receptor G1	MOUSE	11	17.1	139.19	0.103	0.017	0.277	0.321	-0.063	-0.057	0.211	0.38	0.00444189	0.96298
Q9CX80	Q9CX80	Cygb	Cytoglobin	MOUSE	13	63.1	134.12	-0.02	-0.097	0.05	0.44	-0.026	-0.077	0.066	0.253	0.00510381	0.96298
Q9CRA4	Q9CRA4|D3Z458|D3YTN3	Msmo1	Methylsterol monooxygenase 1	MOUSE	7	32.7	114.73	-0.27	0.097	-0.266	-0.402	-0.012	0.052	-0.363	-0.524	0.00549304	0.96298
Q9QXV8	Q9QXV8	Spry2	Protein sprouty homolog 2	MOUSE	8	20.6	79.74	-0.091	-0.084	-0.193	-0.394	0.083	0.063	-0.15	-0.536	0.00522354	0.96298
Q3UDR8	Q3UDR8|F6YIY0	Yipf3	Protein YIPF3	MOUSE	5	16.1	69.36	-0.038	-0.035	-0.153	-0.409	0.08	0.043	0.008	-0.277	0.00544277	0.96298
F7D4S5	F7D4S5|Q68FF7|F6V9T4	Slain1	SLAIN motif-containing protein 1 (Fragment)	MOUSE	5	8.4	44.34	0.103	-0.026	-0.079	-0.301	0.016	0.026	-0.12	-0.312	0.0045838	0.96298
Q9R1C0	Q9R1C0	Taf7	Transcription initiation factor TFIID subunit 7	MOUSE	3	8.5	26.29	0.062	0.066	0.361	0.129	0.117	0.126	0.439	0.324	0.00432937	0.96298
Q8BHD4	Q8BHD4	Frmd3	FERM domain-containing protein 3	MOUSE	2	2.8	21.16	-0.12	-0.079	-0.18	-0.414	-0.187	-0.033	-0.22	-0.325	0.00466696	0.96298
O88554	O88554	Parp2	Poly [ADP-ribose] polymerase 2	MOUSE	3	3.5	20.71	-0.094	0.322	0.012	-0.067	-0.057	0.244	0.072	-0.051	0.0048771	0.96298
P43300	P43300|Q3ZB14	Egr3	Early growth response protein 3	MOUSE	2	6.7	16.41	0.041	0.139	-0.104	-0.326	-0.215	0.041	-0.122	-0.572	0.00517148	0.96298
Q9ERY9	Q9ERY9|D3YUR8	Erg28	Ergosterol biosynthetic protein 28 homolog	MOUSE	3	20.7	33.6	-0.034	0.143	-0.624	-0.608	-0.233	-0.113	-0.334	-0.595	0.00576767	0.982393
O35674	O35674	Adam19	Disintegrin and metalloproteinase domain-containing protein 19	MOUSE	3	2.7	27.06	0.068	-0.048	0.138	-0.219	0.011	-0.001	0.18	-0.209	0.00580755	0.982393
A0A571BDG0	A0A571BDG0|A0A571BDG6|A0A571BG39	Srcin1	SRC kinase-signaling inhibitor 1	MOUSE	92	73.4	1295.46	-0.055	-0.088	-0.24	-0.386	-0.169	-0.024	-0.219	-0.327	0.00602274	0.993837
O88693	O88693	Ugcg	Ceramide glucosyltransferase	MOUSE	7	20	92.82	0.137	0.003	-0.232	-0.404	0.079	-0.03	0.024	-0.428	0.00610174	0.993837
Q7TNL9	Q7TNL9	Chchd10	Coiled-coil-helix-coiled-coil-helix domain-containing 10	MOUSE	2	23.1	28.14	-0.217	-0.064	-0.313	-0.336	-0.083	-0.002	-0.231	-0.234	0.00618443	0.993837
E9PVY8	E9PVY8|B1ARU4|E9QA63|Q9QXZ0|A0A0A0MQA6|A0A571BF93|F6YKN8|A0A5F8MP99|F6RL59	Macf1	Microtubule-actin cross-linking factor 1	MOUSE	388	56.7	5700.84	0.034	-0.14	-0.038	-0.12	0.028	0.046	0.04	-0.011	0.672352	0.999706
F7ACR9	F7ACR9	Macf1	Microtubule-actin cross-linking factor 1 (Fragment)	MOUSE	356	70.9	5310.31	0.147	-0.155	-0.044	-0.038	0.2	0.104	0.359	0.373	0.349775	0.999706
A0A571BGC6	A0A571BGC6	Macf1	Microtubule-actin cross-linking factor 1	MOUSE	355	71.1	5290.11	0.387	-0.087	0.014	-0.015	0.086	0.403	0.526	0.521	0.630551	0.999706
E9QNP1	E9QNP1	Macf1	Microtubule-actin cross-linking factor 1	MOUSE	348	67.4	5177.77	0.24	-0.001	0.207	0.021	0.092	-0.015	0.258	0.16	0.0649714	0.999706
F6Q750	F6Q750	Macf1	Microtubule-actin cross-linking factor 1 (Fragment)	MOUSE	299	71.8	4508.66	-0.053	-0.234	-0.066	-0.238	0.064	-0.146	0.029	-0.078	0.0492347	0.999706
S4R1P5	S4R1P5|Q91ZU6|E9Q9X1|A0A087WSP0|S4R1Y6|A0A1D5RLZ3|S4R2A8|S4R2C6|A0A0A6YXR1|A0A571BGG5|A0A5F8MPU9	Dst	Dystonin	MOUSE	278	38.3	3625.51	0.064	-0.107	-0.013	-0.098	-0.003	0.033	0.03	-0.006	0.766007	0.999706
F6XCT0	F6XCT0	Macf1	Microtubule-actin cross-linking factor 1 (Fragment)	MOUSE	133	75	1911.92	0.372	0.158	0.425	0.124	0	0.03	0.331	0.175	0.0602289	0.999706
A0A087WRB8	A0A087WRB8|A0A0A6YX28	Dst	Dystonin (Fragment)	MOUSE	63	46.4	828.66	-0.479	-0.322	-0.445	-0.402	-0.489	-0.167	-0.104	-0.326	0.00971272	0.999706
A0A087WPR7	A0A087WPR7	Dst	Dystonin (Fragment)	MOUSE	58	20.2	748.16	-0.067	-0.069	0.001	-0.013	0.14	0.065	0.049	0.064	0.969222	0.999706
A0A0A0MQH5	A0A0A0MQH5	Macf1	Microtubule-actin cross-linking factor 1 (Fragment)	MOUSE	24	67.7	384.74	0.506	0.283	0.381	0.265	-0.102	0.052	0.272	0.133	0.269142	0.999706
A0A286YD76	A0A286YD76|Q69ZZ9	Macf1	Microtubule-actin cross-linking factor 1 (Fragment)	MOUSE	20	16.1	280.96	1.072	-0.255	-0.62	-0.347	0.399	1.07	1.441	0.963	0.783162	0.999706
Q9JHU4	Q9JHU4|F6ZX84	Dync1h1	Cytoplasmic dynein 1 heavy chain 1	MOUSE	353	78	5570.94	0.009	-0.075	-0.055	-0.041	0.024	0.042	0.009	0.049	0.965727	0.999706
A3KGU9	A3KGU9|A3KGU4|A0A5F8MQC3|P08032	Sptan1	Spectrin alpha chain, non-erythrocytic 1	MOUSE	271	87.3	4412.59	0.01	-0.168	-0.043	-0.128	0.045	0.049	0.03	0.009	0.708581	0.999706
A3KGU7	A3KGU7|P16546	Sptan1	Spectrin alpha chain, non-erythrocytic 1	MOUSE	269	87.4	4387.5	0.071	-0.144	-0.008	-0.084	0.083	0.058	-0.042	-0.017	0.503182	0.999706
E9Q447	E9Q447	Sptan1	Spectrin alpha chain, non-erythrocytic 1	MOUSE	268	87.4	4381.27	0.036	-0.128	-0.077	-0.024	-0.01	-0.085	-0.05	-0.121	0.330982	0.999706
S4R2F3	S4R2F3|S4R1J9|S4R1I1|S4R1U2|S4R1B7|A0A571BDG9|S4R241	Ank2	Ankyrin-2	MOUSE	262	79.2	4166.36	0.089	-0.075	0.056	-0.05	0.002	0.001	-0.013	-0.023	0.682172	0.999706
S4R2R5	S4R2R5|S4R2Q9	Ank2	Ankyrin-2	MOUSE	259	79.6	4126.75	0.101	-0.112	0.058	-0.057	-0.103	0.036	0.051	0.069	0.905367	0.999706
A0A087WNU5	A0A087WNU5|A0A087WRU2	Ank3	Ankyrin-3 (Fragment)	MOUSE	136	51.5	1719.28	0.106	-0.193	-0.197	-0.448	0.031	0.088	-0.008	-0.257	0.0317093	0.999706
A0A1W2P812	A0A1W2P812|S4R236|S4R2F5|G3X971|S4R278	Ank3	Ankyrin-3	MOUSE	98	66.3	1450.23	0.411	0.068	0.381	0.355	0.101	0.381	0.231	0.002	0.318924	0.999706
S4R2T7	S4R2T7	Ank2	Ankyrin-2 (Fragment)	MOUSE	79	79.9	1303.23	0.302	-0.313	-0.16	-0.162	0.052	0.093	0.282	-0.081	0.448673	0.999706
A0A0R4J1N7	A0A0R4J1N7|Q0VGY9|D3YTV8|Q02357|E9QNT8|B7ZW98|G5E8J2|D3Z5M4|G8JL84|G3UY11|F7D1P5|D6RJ51	Ank1	Ankyrin-1	MOUSE	46	26.9	577.54	0.085	0.005	0.054	0.024	-0.057	-0.095	-0.054	-0.045	0.905481	0.999706
S4R2D6	S4R2D6	Ank2	Ankyrin-2	MOUSE	31	72.5	481.63	0.124	-0.04	0.094	-0.081	-0.034	-0.011	-0.044	-0.265	0.150745	0.999706
S4R1M4	S4R1M4	Ank2	Ankyrin-2 (Fragment)	MOUSE	15	81.2	235.44	-0.576	0.044	0.491	0.231	0.263	-0.315	-0.517	-0.301	0.986434	0.999706
A0A087WRP9	A0A087WRP9	Ank3	Ankyrin-3 (Fragment)	MOUSE	9	62.9	118.32	0.669	0.617	0.768	0.39	0.236	0.47	0.421	0.36	0.00692151	0.999706
A0A1D5RLB2	A0A1D5RLB2	Ank2	Ankyrin-2 (Fragment)	MOUSE	4	33.8	53.24	0.987	-0.681	-0.65	-0.359	0.144	0.88	1.279	0.836	0.898558	0.999706
Q9QXS1	Q9QXS1|E9Q3W4|A0A3B2W7J8|A0A0R4J218|A0A0R4J223|E9PW24	Plec	Plectin	MOUSE	280	59.9	3739.58	-0.095	-0.238	-0.147	-0.217	0.113	0.13	0.163	0.072	0.887948	0.999706
A0A0R4J221	A0A0R4J221|E9Q9J6	Plec	Plectin (Fragment)	MOUSE	28	45.4	382.14	-0.12	0.014	0.112	-0.241	0.033	0.056	0.045	0.153	0.793574	0.999706
Q8R0W0	Q8R0W0|A0A2I3BRT4	Eppk1	Epiplakin	MOUSE	7	1.2	86.61	-0.022	-0.135	-0.093	-0.149	-0.109	0.08	0.142	0.009	0.821153	0.999706
Q62261	Q62261|A0A0A0MQG2	Sptbn1	Spectrin beta chain, non-erythrocytic 1	MOUSE	221	86.4	3527.31	0.031	-0.149	-0.038	-0.125	0.061	0.067	0.051	0.027	0.726189	0.999706
Q68FG2	Q68FG2|A0A494BBH5|A0A5F8MPM8	Sptbn2	Spectrin beta chain	MOUSE	205	82.7	3174.31	0.045	-0.09	0.004	-0.103	0.026	0.039	0.023	-0.006	0.701073	0.999706
E9PX29	E9PX29|Q91ZE6|E9PZC2|D3YWH8|D3Z4P8	Sptbn4	Spectrin beta chain	MOUSE	127	56.8	1720.94	0.098	-0.021	0.044	0.006	-0.036	0.026	0.036	0.022	0.954967	0.999706
Q3UGX2	Q3UGX2|E9Q397|P15508	Sptb	Spectrin beta chain	MOUSE	124	58.5	1636.02	0.054	-0.132	-0.044	-0.123	0.013	0.049	0.117	0.041	0.780991	0.999706
P57780	P57780	Actn4	Alpha-actinin-4	MOUSE	78	79	1175.6	0.064	-0.092	-0.083	-0.109	-0.011	0.023	0.133	-0.01	0.798649	0.999706
A1BN54	A1BN54	Actn1	Alpha actinin 1a	MOUSE	69	82.8	1089.85	0.027	-0.092	0.001	-0.129	0.016	0.114	0.126	0.14	0.946668	0.999706
Q7TPR4	Q7TPR4	Actn1	Alpha-actinin-1	MOUSE	69	83.1	1085.11	-0.405	-0.052	-0.189	-0.114	-0.134	-0.139	-0.308	-0.279	0.131246	0.999706
Q9JI91	Q9JI91|O88990|A0A1Y7VMW4	Actn2	Alpha-actinin-2	MOUSE	54	60.9	749.9	-0.089	-0.324	-0.21	-0.417	0.18	0.147	0.173	0.007	0.42004	0.999706
E9Q2W9	E9Q2W9	Actn4	Alpha-actinin-4 (Fragment)	MOUSE	42	72.9	650.51	-0.054	-0.209	-0.123	-0.207	-0.033	0.244	0.062	-0.081	0.680972	0.999706
A0A1L1SVJ6	A0A1L1SVJ6	Actn4	Alpha-actinin-4 (Fragment)	MOUSE	30	92.8	457.04	-0.075	-0.255	-0.07	-0.138	0.085	0.035	0.072	0.141	0.672739	0.999706
A2AN08	A2AN08|F6SSP6|Z4YMA7|Z4YLP1	Ubr4	E3 ubiquitin-protein ligase UBR4	MOUSE	226	51.8	3201.07	0.028	-0.04	-0.08	-0.072	-0.003	0.053	0.018	-0.015	0.865995	0.999706
A0A0R4J0I9	A0A0R4J0I9|Q91ZX7|Q3U5J2|D3Z5M3	Lrp1	Prolow-density lipoprotein receptor-related protein 1	MOUSE	189	50	2993.47	-0.034	0.036	0.009	-0.043	-0.031	-0.066	-0.118	-0.051	0.877731	0.999706
Q9JI18	Q9JI18|A2API5|E9Q202|A0A0N4SVX0|F6YDG9	Lrp1b	Low-density lipoprotein receptor-related protein 1B	MOUSE	43	10	499.76	0.058	0.045	0.018	-0.107	0.025	-0.037	-0.009	-0.113	0.213357	0.999706
Q9QYX7	Q9QYX7|S4R2E0	Pclo	Protein piccolo	MOUSE	209	45.7	2855.99	0.074	-0.141	-0.036	-0.185	-0.034	0.006	0	-0.065	0.411216	0.999706
O88737	O88737|V9GX98	Bsn	Protein bassoon	MOUSE	178	57.4	2601.81	-0.029	-0.162	-0.095	-0.213	0.015	0.034	0.013	-0.021	0.530334	0.999706
Q6ZWR6	Q6ZWR6|A0A1L1STC6|A0A1L1SRV6|Q6ZWR5|D3Z412	Syne1	Nesprin-1	MOUSE	234	28.6	2841.26	-0.014	-0.068	-0.083	-0.167	0.053	0.063	0.039	-0.018	0.535099	0.999706
Q6ZWQ0	Q6ZWQ0|E9QP46|Q6DFZ2|F6W8R9|Q6ZWN0|D3Z2J8	Syne2	Nesprin-2	MOUSE	53	7.6	548.71	0.011	0.568	0.187	0.238	-0.154	-0.2	-0.182	-0.064	0.669118	0.999706
F7BX34	F7BX34	Syne2	Nesprin-2 (Fragment)	MOUSE	15	20	169	-0.274	-0.345	-0.057	0.011	-0.125	-0.008	-0.159	-0.173	0.478505	0.999706
P19096	P19096|A0A0U1RNJ1|A0A0U1RPP5	Fasn	Fatty acid synthase	MOUSE	164	81.8	2741.19	-0.043	0.006	0.084	0.076	0.034	-0.001	-0.02	0.065	0.745033	0.999706
Q3UH59	Q3UH59|Q61879|Q8BXF2|Q02566|B1AR69|Q91Z83|E9Q264	Myh10	Myosin-10	MOUSE	175	71.8	2639.42	0.02	-0.127	-0.022	0.016	0.056	0.07	0.076	0.13	0.673518	0.999706
Q5SV64	Q5SV64	Myh10	Myosin-10	MOUSE	174	72.3	2620.75	-0.039	-0.264	-0.096	-0.15	-0.016	0.169	0.057	0.11	0.993798	0.999706
Q8VDD5	Q8VDD5|A0A2R8VKI5|F2Z494|A0A2R8W6V7	Myh9	Myosin-9	MOUSE	143	68.1	2036.78	0.012	-0.097	-0.017	-0.02	0.012	0.05	0.073	0.096	0.894963	0.999706
Q6URW6	Q6URW6|K3W4R2|A0A140LI60|A0A140LHX1	Myh14	Myosin-14	MOUSE	81	41	1013.8	0.105	0.067	0.066	0.158	-0.1	-0.069	0.049	0.017	0.666134	0.999706
A2AQP0	A2AQP0	Myh7b	Myosin-7B	MOUSE	7	2.8	54.87	0.33	-0.137	-0.478	-0.386	-0.112	0.405	0.634	0.167	0.944779	0.999706
Q5SX40	Q5SX40|G3UW82|P13542|Q5SX39|Q8BGE8|Q1WNQ6	Myh1	Myosin-1	MOUSE	5	2.1	44.45	0.19	-0.129	0.157	-0.03	0.157	0.198	0.074	0.066	0.441411	0.999706
P13541	P13541	Myh3	Myosin-3	MOUSE	2	1.1	18.35	-0.368	-0.866	-0.173	0.016	0.745	-0.252	0.017	0.039	0.191583	0.999706
A2ARP8	A2ARP8	Map1a	Microtubule-associated protein 1A	MOUSE	162	57.5	2403.71	-0.031	-0.204	-0.148	-0.198	0.068	0.093	0.043	-0.06	0.494319	0.999706
Q9QYR6	Q9QYR6	Map1a	Microtubule-associated protein 1A	MOUSE	162	62.7	2401.08	-0.123	-0.358	-0.343	-0.442	-0.03	-0.072	-0.086	-0.273	0.0275109	0.999706
P14873	P14873	Map1b	Microtubule-associated protein 1B	MOUSE	158	65.1	2583.94	0.06	-0.148	0.007	-0.077	-0.027	-0.045	-0.097	-0.078	0.471856	0.999706
E9Q2E4	E9Q2E4|Q6GQX8|A0A0J9YUS1|F6XXX5	Hectd4	HECT domain E3 ubiquitin protein ligase 4	MOUSE	175	49.5	2529.74	0.057	-0.063	-0.058	-0.018	-0.033	0.009	0.003	0.011	0.95885	0.999706
Q5SXR6	Q5SXR6|Q68FD5|F6Z1R4	Cltc	Clathrin heavy chain	MOUSE	138	84.2	2426.86	-0.056	-0.153	-0.06	-0.056	0.046	0.061	0.024	0.052	0.956773	0.999706
A0A1L1SQ51	A0A1L1SQ51|E9PUM4|Q71LX4|Q8CDM9|A0A1L1SVA8	Tln2	Talin-2	MOUSE	158	72.6	2400.14	0.022	-0.166	-0.074	-0.133	0.029	0.044	0.015	-0.009	0.665754	0.999706
P26039	P26039|A2AIM2|F6S1V7|F6SX70	Tln1	Talin-1	MOUSE	116	52.9	1599.07	0.116	0.134	0.128	0.2	-0.086	-0.055	0.015	0.082	0.378328	0.999706
A0A1L1SRI1	A0A1L1SRI1|A0A1L1SQP9	Tln2	Talin-2 (Fragment)	MOUSE	86	72.1	1387.34	-0.013	-0.321	-0.156	-0.341	0.127	0.119	0.022	-0.108	0.213736	0.999706
Q8BPN8	Q8BPN8|B0V2P5|F6RYL8|B0V2P6	Dmxl2	DmX-like protein 2	MOUSE	154	57.8	2312.13	-0.014	-0.139	-0.023	-0.036	0.058	0.052	0.033	0.069	0.883539	0.999706
F8WGX5	F8WGX5|Q6PNC0	Dmxl1	DmX-like protein 1	MOUSE	52	19.2	650.47	-0.018	-0.056	0.025	0.024	0.034	0.072	0.054	0.085	0.853755	0.999706
E9Q401	E9Q401|F6U7V1|Q80ZZ5|A0A1L1SQG7|E9PZQ0|K3W4M2	Ryr2	Ryanodine receptor 2	MOUSE	163	39.9	2291.53	-0.005	-0.118	-0.047	-0.058	0.04	0.072	0.048	0.092	0.9765	0.999706
E9PW34	E9PW34|A0A140LJK7|A2AGL3|A0A140LJF7	Ryr3	Ryanodine receptor 3	MOUSE	30	6.1	304.56	0.111	0.038	0.087	-0.088	0.098	0.095	0.062	0.079	0.450796	0.999706
A0A1Y7VJP1	A0A1Y7VJP1	Ryr2	Ryanodine receptor 2 (Fragment)	MOUSE	29	33.5	384.35	0.331	0.281	0.074	0.029	0.212	0.065	0.07	0.138	0.0881022	0.999706
A0A1Y7VK09	A0A1Y7VK09	Ryr2	Ryanodine receptor 2 (Fragment)	MOUSE	14	44.1	208.58	0.062	0.036	0.071	-0.013	-0.077	0.079	-0.134	-0.096	0.701391	0.999706
Q9EPN1	Q9EPN1|A0A5F8MPY6	Nbea	Neurobeachin	MOUSE	150	59.8	2261.81	0.013	-0.12	-0.071	-0.053	0.051	0.085	0.056	0.098	0.954197	0.999706
E9Q3Y4	E9Q3Y4|Q9ESE1|A0A0A6YXL6|A0A0A6YXX3|A0A1D5RM41|Q8BSM6	Lrba	Lipopolysaccharide-responsive and beige-like anchor protein	MOUSE	39	14.8	467.89	0.1	0.109	0.022	0.035	-0.05	0.037	0.136	0.037	0.7731	0.999706
Q7TPH6	Q7TPH6|F6SMY7|F6T4V9|A0A668KLT2|F7CZG3	Mycbp2	E3 ubiquitin-protein ligase MYCBP2	MOUSE	171	44.1	2193.72	-0.009	-0.06	-0.12	-0.242	0.021	0.042	-0.012	-0.112	0.105075	0.999706
A2AFQ0	A2AFQ0|Q7TMY8|F6XP90|A0A668KL97|F6UYC1	Huwe1	HECT-type E3 ubiquitin transferase	MOUSE	152	42.1	2151.53	0.009	0.004	-0.043	0.008	0.02	0.063	0.038	0.062	0.928899	0.999706
A0A668KLC6	A0A668KLC6|P20357|G3UZK9|G3UZE9|Q80ZL4|Q80X35|F7ALC8|E9Q8Y2|G3UXY3	Map2	Microtubule-associated protein	MOUSE	137	75.4	2114.74	-0.051	-0.318	-0.241	-0.448	0.135	0.189	0.108	-0.201	0.134624	0.999706
G3UWW1	G3UWW1	Map2	Microtubule-associated protein (Fragment)	MOUSE	29	61.3	322.49	0.373	-0.561	0.269	-0.05	0.036	0.176	0.573	0.244	0.200539	0.999706
G3UZJ2	G3UZJ2	Map2	Microtubule-associated protein (Fragment)	MOUSE	21	74.1	259.06	-0.114	-0.694	-0.362	-0.899	0.066	0.147	-0.045	-0.557	0.0347041	0.999706
D3Z4J3	D3Z4J3|D3YZ62|Q99104|F6TDE5|B8JK05|F6Z2S4|E9Q1F5|A0A1L1SUF0|D6RFU0	Myo5a	Unconventional myosin-Va	MOUSE	140	67.2	2096.81	0.025	-0.08	-0.054	-0.041	0.001	0.022	-0.018	-0.002	0.907498	0.999706
G3X9Y9	G3X9Y9|P21271|G5E8G6|D3Z135|H3BLK6	Myo5b	Unconventional myosin-Vb	MOUSE	58	32.5	726.81	0.057	-0.136	-0.13	-0.228	0.09	0.066	0.117	-0.095	0.188477	0.999706
F8VPU6	F8VPU6	Usp9y	Ubiquitinyl hydrolase 1	MOUSE	42	13.6	532.47	-0.025	0.133	-0.461	-0.157	-0.085	0.101	-0.063	0.195	0.18923	0.999706
G3UY52	G3UY52	Usp9x	Probable ubiquitin carboxyl-terminal hydrolase FAF-X (Fragment)	MOUSE	11	70.1	165.84	0.179	0.01	0.127	0.089	0.223	0.203	0.027	0.094	0.213884	0.999706
Q0KL02	Q0KL02|A0A2I3BRP6|A0A2I3BQT2|A0A2I3BRK3|A0A2I3BPR4	Trio	Triple functional domain protein	MOUSE	138	47.1	1985.22	-0.026	-0.061	0.019	0.038	0.031	0.001	-0.012	0.031	0.873351	0.999706
A2CG49	A2CG49|F6QYT9|B1B1A7|D3Z560|D3Z4R2|D3Z532|D3Z535|D3Z534|G5E825|Q9CWR0|A0A0R4J211|A0A1W2P6R9|A0A1Y7VNM7	Kalrn	Kalirin	MOUSE	128	48.7	1818.8	-0.016	-0.143	-0.034	-0.107	0.075	0.058	0.084	0.009	0.71191	0.999706
Q99PV0	Q99PV0|B7ZC27	Prpf8	Pre-mRNA-processing-splicing factor 8	MOUSE	143	63.6	1965.46	-0.03	0.145	-0.092	-0.118	-0.052	0.061	-0.007	-0.086	0.117241	0.999706
Q9ERU9	Q9ERU9	Ranbp2	E3 SUMO-protein ligase RanBP2	MOUSE	141	49.1	1884.02	0.002	-0.114	-0.102	-0.275	-0.002	0.022	0.027	-0.13	0.106367	0.999706
E9PVZ8	E9PVZ8|E9QAH1	Golgb1	Golgi autoantigen, golgin subfamily b, macrogolgin 1	MOUSE	146	47.4	1876.82	0.071	-0.179	-0.1	-0.304	0.027	0.096	0.126	-0.121	0.17782	0.999706
B2RRE2	B2RRE2|E9QAX2|Q9JMH9|K3W4L0|A0A1C7ZN10|E9Q405|E9QA74|F6ZGN3	Myo18a	Myo18a protein	MOUSE	136	63.9	1876.63	0.048	-0.1	0.015	-0.02	0.052	0.062	0.056	0.08	0.828982	0.999706
Q6P4T2	Q6P4T2	Snrnp200	U5 small nuclear ribonucleoprotein 200 kDa helicase	MOUSE	123	63.6	1827.36	-0.084	0.018	-0.08	-0.117	-0.028	0.024	0.002	-0.098	0.291956	0.999706
Q5SWU9	Q5SWU9|V9GWS0|V9GXY1|A0A0R4J1S9|D3Z0B3|V9GWS1|V9GWR9	Acaca	Acetyl-CoA carboxylase 1	MOUSE	121	63.5	1792.71	0.075	0.001	-0.007	0.009	0.016	0.059	0.104	0.058	0.913232	0.999706
E9Q4Z2	E9Q4Z2	Acacb	Acetyl-CoA carboxylase 2	MOUSE	23	8.9	259.59	0.103	-0.092	-0.054	0.101	-0.049	-0.049	0.178	0.059	0.573172	0.999706
E9PVA8	E9PVA8	Gcn1	eIF-2-alpha kinase activator GCN1	MOUSE	135	58.9	1781.46	-0.058	0.321	-0.118	0.059	0.031	0.066	-0.049	-0.037	0.160722	0.999706
K3W4R5	K3W4R5|Z4YL78|A0A0R4J0K2|A2AGT5	Ckap5	Cytoskeleton-associated protein 5	MOUSE	125	61.2	1711.14	-0.019	-0.145	-0.077	-0.174	0.055	0.051	0.01	-0.026	0.530248	0.999706
Q9JLN9	Q9JLN9	Mtor	Serine/threonine-protein kinase mTOR	MOUSE	117	56.4	1651.2	0.018	-0.017	-0.029	0.02	-0.001	0.016	0.008	0.053	0.929134	0.999706
E9PZP8	E9PZP8|F6RXM1	Herc1	HECT and RLD domain-containing E3 ubiquitin protein ligase family member 1	MOUSE	121	31.8	1644.04	0.001	-0.068	-0.062	-0.103	0	0.022	0.026	-0.076	0.573963	0.999706
S4R1L5	S4R1L5|S4R2P8|S4R268|S4R2N7|A0A3Q4EH00|S4R2J7|S4R1S3	Birc6	Baculoviral IAP repeat-containing protein 6	MOUSE	119	31.4	1635.21	0.006	-0.062	-0.148	-0.208	0.023	0.063	0.003	-0.148	0.103952	0.999706
O88738	O88738|J3QP64|S4R1R8	Birc6	Baculoviral IAP repeat-containing protein 6	MOUSE	119	30.9	1629.23	0.011	0.106	0.401	0.163	-0.033	-0.463	-0.121	-0.114	0.487651	0.999706
Q7M739	Q7M739|F6ZDS4|F6RX08	Tpr	Nucleoprotein TPR	MOUSE	127	50.1	1631.29	0	-0.206	-0.083	-0.17	0.03	0.032	0.034	-0.05	0.44699	0.999706
F6XLV1	F6XLV1	Crocc2	Ciliary rootlet coiled-coil, rootletin family member 2	MOUSE	11	5.2	87.66	0.197	-0.026	-0.058	0.021	-0.083	-0.049	0.118	-0.074	0.887942	0.999706
A0A0A0MQ92	A0A0A0MQ92|A0A0A0MQB7|Q9WTS5|A0A1D5RM80	Tenm2	Teneurin-2	MOUSE	108	49.1	1621.58	0.09	-0.12	-0.023	-0.159	0.022	0.063	0.014	-0.04	0.450809	0.999706
Q3UHK6	Q3UHK6|A0A0U1RNZ7	Tenm4	Teneurin-4	MOUSE	91	39.5	1316.55	0.053	-0.004	0.026	-0.095	0.051	0.074	0.049	-0.021	0.425284	0.999706
Q9WTS4	Q9WTS4|A2ANL9	Tenm1	Teneurin-1	MOUSE	86	39.6	1249.01	0.004	-0.091	-0.051	-0.154	-0.029	0.05	-0.036	-0.073	0.484795	0.999706
Q9WTS6	Q9WTS6|G3X907|B7ZNJ5|D3YW49	Tenm3	Teneurin-3	MOUSE	74	33.4	957.55	0.018	-0.028	-0.013	-0.13	-0.014	0.014	0.002	-0.051	0.517093	0.999706
D3YVP2	D3YVP2|F6UP10	Tenm4	Teneurin-4 (Fragment)	MOUSE	7	74.2	89.41	0.146	-0.077	0.045	-0.23	0.024	0.194	0.165	0.012	0.367442	0.999706
Q8BTM8	Q8BTM8|B7FAU9|B7FAV1|F6XC15|F6Z2C0|J3JS91|A0A668KLG7	Flna	Filamin-A	MOUSE	110	53.7	1620.51	0.063	0.056	0.027	0.135	-0.095	-0.044	0.062	-0.027	0.850574	0.999706
Q80X90	Q80X90	Flnb	Filamin-B	MOUSE	77	39	1066.66	0.044	0.055	-0.019	0.155	-0.024	0.066	0.279	0.009	0.700729	0.999706
Q8VHX6	Q8VHX6	Flnc	Filamin-C	MOUSE	17	5.9	191.98	-0.073	0.033	-0.262	-0.198	0.192	0.195	0.064	-0.006	0.201589	0.999706
Q64511	Q64511|F6XX57|F6U5K2	Top2b	DNA topoisomerase 2-beta	MOUSE	113	68.1	1615.72	-0.062	0.079	0.017	-0.091	-0.054	-0.055	-0.112	-0.164	0.321741	0.999706
Q01320	Q01320	Top2a	DNA topoisomerase 2-alpha	MOUSE	66	43.7	835.35	0.164	0.584	0.241	0.318	-0.218	-0.265	-0.209	0.002	0.759675	0.999706
Q04690	Q04690|A0A1W2P863	Nf1	Neurofibromin	MOUSE	117	44.9	1580.53	0.022	-0.085	-0.08	-0.047	0.025	0.09	0.114	0.078	0.996333	0.999706
Q5SYH9	Q5SYH9	Nf1	Neurofibromin (Fragment)	MOUSE	31	43.2	415.97	0.193	-0.075	0.154	0.102	-0.205	0.134	-0.008	-0.126	0.966783	0.999706
Q6VNB8	Q6VNB8|G3UYW1|A0A1D5RLV7|G3UY81	Wdfy3	WD repeat and FYVE domain-containing protein 3	MOUSE	117	40.6	1565.12	0.039	-0.038	0.001	0.008	-0.023	0.009	-0.008	0.072	0.914246	0.999706
E9Q3L2	E9Q3L2|A0A140T8I9|A0A338P7D3|A0A338P6S0|A0A338P6F9	Pi4ka	Phosphatidylinositol 4-kinase alpha	MOUSE	105	60.3	1559.19	0.001	-0.073	-0.046	-0.08	0.016	0.042	0.028	0.004	0.947002	0.999706
Q6PB66	Q6PB66|F6V2A3	Lrpprc	Leucine-rich PPR motif-containing protein, mitochondrial	MOUSE	103	78.3	1555.22	-0.012	0.301	-0.005	0.151	-0.068	-0.07	-0.2	-0.081	0.380864	0.999706
P70206	P70206	Plxna1	Plexin-A1	MOUSE	104	60.4	1538.25	0.042	-0.065	0.04	-0.013	0.039	0.037	-0.018	0.042	0.929794	0.999706
Q80UG2	Q80UG2	Plxna4	Plexin-A4	MOUSE	101	57.7	1493.1	-0.025	-0.058	0.04	0.006	0.068	0.071	-0.002	0.076	0.968474	0.999706
P70207	P70207|F6VSI0	Plxna2	Plexin-A2	MOUSE	80	48.5	1169.5	0.005	-0.001	0.051	-0.003	-0.012	-0.013	-0.101	-0.076	0.960717	0.999706
P70208	P70208	Plxna3	Plexin-A3	MOUSE	62	37.8	825.98	0.122	0.012	0.026	-0.038	-0.004	0.041	0.066	0.033	0.840023	0.999706
E9Q0N0	E9Q0N0|E9Q3I5|E9Q3I9|Q6NZJ5|D3Z6P4|F6U8U1|A0A338P7I4|A0A338P6K7|A0A338P6L8|F6TCC6|F6R6C8|F6ZLP6|Q6J1S9|F6ZX53|Q6J1F0	Itsn1	Intersectin-1	MOUSE	104	63.9	1507.61	0.013	-0.061	0.044	0.008	-0.01	-0.023	-0.039	0.028	0.886229	0.999706
Q9Z0R4	Q9Z0R4|E9Q3I4|E9Q3I8	Itsn1	Intersectin-1	MOUSE	103	63.8	1491.93	0.065	0.014	0.105	-0.085	-0.056	-0.144	-0.067	-0.035	0.734962	0.999706
B2RR82	B2RR82|Q9Z0R6|E9QNG1|A0A1W2P775|A0A1W2P7G8	Itsn2	Intersectin-2	MOUSE	42	25.8	508.35	0	-0.123	-0.071	-0.153	0.051	0.06	0.119	-0.01	0.609171	0.999706
E9Q3M3	E9Q3M3|O08788|E9Q586|D3YX34|D3Z2M9|D3YYG9	Dctn1	Dynactin subunit 1	MOUSE	96	74.9	1485.2	0.031	-0.142	0.053	0.004	0.057	0.05	0.038	0.115	0.614814	0.999706
Q9QZQ1	Q9QZQ1|E9Q9C3|A0A668KLE6	Afdn	Afadin	MOUSE	107	65.1	1482.47	0.012	-0.134	-0.055	-0.16	0.038	0.049	-0.014	-0.028	0.540718	0.999706
E9Q852	E9Q852	Afdn	Afadin	MOUSE	104	65.2	1443.03	0.121	-0.237	-0.017	0.046	0.037	0.206	0.255	0.208	0.701726	0.999706
E9PYX7	E9PYX7	Afdn	Afadin	MOUSE	97	65.9	1362.73	-0.153	-0.184	-0.09	-0.233	-0.159	-0.14	-0.115	0.033	0.309933	0.999706
D3YUD2	D3YUD2|D3Z7L2	Afdn	Afadin (Fragment)	MOUSE	16	70.7	219.29	0.238	0.162	0.195	0.077	-0.123	0.056	-0.048	-0.108	0.680873	0.999706
A0A6I8MX08	A0A6I8MX08|Q5SNZ0|F6R1B7|Z4YLN8|Z4YKY0	Ccdc88a	Girdin	MOUSE	119	51.4	1478.13	0.059	-0.097	-0.026	-0.071	-0.019	0.039	0.013	-0.018	0.890886	0.999706
Z4YLP6	Z4YLP6	Ccdc88a	Girdin (Fragment)	MOUSE	26	57.5	317.92	1.589	0.577	0.829	0.597	0.088	0.458	1.766	0.921	0.166047	0.999706
Q9QXL1	Q9QXL1|E9Q0A4	Kif21b	Kinesin-like protein KIF21B	MOUSE	105	66	1455.17	0.043	-0.1	-0.005	-0.056	0.028	0.01	0.003	0.018	0.777126	0.999706
F8VQE2	F8VQE2	Kif21b	Kinesin-like protein KIF21B	MOUSE	104	67.1	1429.23	1.476	-0.056	-0.106	-0.026	0.099	0.383	1.481	0.129	0.525326	0.999706
E9Q0J5	E9Q0J5|Q9QXL2|F8WGN6|A0A2R8VJN0	Kif21a	Kinesin-like protein KIF21A	MOUSE	80	61.2	1176.09	0.02	-0.094	-0.024	0.004	0.011	0.027	0.042	0.083	0.813581	0.999706
A0A2R8VKM5	A0A2R8VKM5	Kif21a	Kinesin-like protein KIF21A (Fragment)	MOUSE	10	61.6	161.27	0.073	0.003	0.205	0.114	0.074	-0.031	0.067	0.144	0.143623	0.999706
J3QNW9	J3QNW9|B7ZNG0|E9QMU1	Kif7	Kinesin-like protein KIF7	MOUSE	7	3.8	52.75	-0.014	-0.236	-0.158	-0.131	0.225	0.24	0.206	0.154	0.891316	0.999706
Q7M6Z4	Q7M6Z4	Kif27	Kinesin-like protein KIF27	MOUSE	6	3.3	51.73	0.161	0.036	-0.077	-0.05	-0.022	-0.004	0.163	-0.062	0.769254	0.999706
Q8CH77	Q8CH77|A0A589P973|A0A087WSM9	Nav1	Neuron navigator 1	MOUSE	106	61.1	1452.25	0.02	-0.175	-0.068	-0.176	0.046	0.073	0.045	-0.018	0.570577	0.999706
E9QMF5	E9QMF5|Q80TN7|A0A668KM70|A0A571BDN3	Nav3	Neuron navigator 3	MOUSE	72	34.7	925.25	-0.088	-0.253	-0.076	-0.244	0.091	0.046	0.118	0.022	0.473766	0.999706
V9GXT3	V9GXT3|V9GX91|E9Q842|A0A5F8MPR0	Nav2	Neuron navigator 2	MOUSE	21	8.6	213.45	-0.065	-0.346	-0.201	-0.592	0.089	0.164	0.03	-0.206	0.0830839	0.999706
B2RUG9	B2RUG9|Q61315|E9QLQ9|E9Q4H1|Q8C493	Apc	Adenomatosis polyposis coli	MOUSE	107	43.1	1446.08	0.043	-0.167	-0.041	-0.079	-0.004	0.054	0.033	-0.001	0.85861	0.999706
D3YTR0	D3YTR0|Q9Z1K7|G5E832|D3Z344|D3Z3K9|D3YYQ9	Apc2	Adenomatous polyposis coli protein 2	MOUSE	43	19.1	480.83	0.068	-0.083	0.015	-0.179	-0.018	0.027	0.099	-0.051	0.29193	0.999706
A0A087WQE8	A0A087WQE8|Q6TA13|G3UW47|E9Q9G6|E9QAN4|P33173|A0A087WNM0|A0A087WSU7|A0A087WRJ3	Kif1a	Kinesin-like protein KIF1A	MOUSE	98	61	1434.98	0.022	-0.085	0.04	0.024	-0.01	0.014	0.011	0.083	0.714194	0.999706
A0A5F8MPF0	A0A5F8MPF0|Q60575|A2AH75|F6XNB6	Kif1b	Kinesin-like protein KIF1B	MOUSE	73	38.9	933.89	0.049	-0.126	-0.112	-0.29	0.007	-0.015	-0.142	-0.287	0.0107458	0.999706
E9Q9B0	E9Q9B0|O35071|Q3V3Y9	Kif1c	Kinesin-like protein KIF1C	MOUSE	19	18.5	208.45	0.23	-0.005	0.094	0.069	-0.178	-0.075	0.042	0.098	0.799567	0.999706
A0A286YCV9	A0A286YCV9|E9Q4K7	Kif13b	Kinesin family member 13B	MOUSE	7	4	81.41	-0.012	0.295	0.26	0.148	-0.012	-0.065	0.001	0.069	0.517428	0.999706
Q9EQW7	Q9EQW7|F8VQ75|A0A286YDX6|A0A571BEU9	Kif13a	Kinesin-like protein KIF13A	MOUSE	7	4	62.94	-0.108	0.04	-0.062	0.08	-0.054	0.028	0.063	0.096	0.224082	0.999706
Q8CGC7	Q8CGC7|A0A0A6YWA4|A0A0A6YWH3	Eprs1	Bifunctional glutamate/proline--tRNA ligase	MOUSE	101	70.3	1424.02	-0.021	0.032	-0.062	-0.044	0.013	0.033	-0.075	-0.118	0.33819	0.999706
P23116	P23116|A0A494B9I0	Eif3a	Eukaryotic translation initiation factor 3 subunit A	MOUSE	128	62.6	1412.76	-0.087	-0.271	-0.288	-0.326	0.116	0.142	0.028	-0.138	0.23631	0.999706
Q01853	Q01853|D6RGM7	Vcp	Transitional endoplasmic reticulum ATPase	MOUSE	80	87	1391.63	-0.003	-0.15	0	0.011	0.037	0.01	-0.067	0.09	0.557577	0.999706
Q3UMC0	Q3UMC0|A0A0A0MQ80|A0A0G2JFY0	Spata5	ATPase family protein 2 homolog	MOUSE	14	18.9	166.34	-0.032	0.1	-0.03	0.101	-0.095	-0.101	-0.107	-0.071	0.684112	0.999706
Q9D3R6	Q9D3R6|D3Z4J2|D3Z0U5	Katnal2	Katanin p60 ATPase-containing subunit A-like 2	MOUSE	2	8.1	23.13	0.24	-0.221	0.186	-0.385	0.383	0.339	0.292	0.112	0.121115	0.999706
E9PV45	E9PV45|B1AY13	Usp24	Ubiquitinyl hydrolase 1	MOUSE	96	45.7	1385.52	-0.023	0.005	-0.051	0.005	0.006	0.018	-0.036	0.051	0.768449	0.999706
B1ART2	B1ART2|B1ART1|V9GX23|F6XI52	Vps13d	Vacuolar protein sorting 13D	MOUSE	115	29.4	1378.6	-0.058	-0.169	-0.099	-0.133	0.079	0.088	0.105	0.07	0.955656	0.999706
Q7TT50	Q7TT50|A0A1Y7VLI0|A0A1Y7VKD5|A0A1Y7VM95|D6RI32|P54265|E9Q6J9	Cdc42bpb	Serine/threonine-protein kinase MRCK beta	MOUSE	101	58.3	1374.22	0.028	-0.111	-0.006	-0.066	0.082	0.099	0.074	0.036	0.836858	0.999706
A0A1D5RLQ9	A0A1D5RLQ9|E9PVY0|Q3UU96|D3YYN8|H7BX44|F6Q5A5|F6S5Z6|F6YZJ7|F6W0C2|A0A0A6YXJ5	Cdc42bpa	Non-specific serine/threonine protein kinase	MOUSE	75	48.1	964.16	0.078	-0.069	-0.011	-0.09	0.091	0.089	0.1	-0.017	0.401637	0.999706
P62281	P62281|A0A1B0GRR3|A0A1B0GSE8	Rps11	40S ribosomal protein S11	MOUSE	18	60.7	211.05	-0.141	0.528	-0.175	-0.147	0.07	-0.027	-0.12	-0.229	0.195487	0.999706
Q80UW5	Q80UW5	Cdc42bpg	Serine/threonine-protein kinase MRCK gamma	MOUSE	4	2	45.54	0.001	-0.169	-0.105	-0.346	1.026	0.859	1.377	0.97	0.445514	0.999706
B2RQC6	B2RQC6|G3UWN2|E9QAI5|E9QAT6|F6S3Z3	Cad	CAD protein	MOUSE	89	57.3	1368.33	0.032	0.234	0.037	0.125	-0.035	-0.084	-0.128	-0.012	0.680728	0.999706
E9Q7G0	E9Q7G0|A0A1B0GSW3|A0A1B0GT61|F6ZQA3|A0A1B0GSH2|A0A1B0GT38	Numa1	Nuclear mitotic apparatus protein 1	MOUSE	99	53	1361.8	0.133	0.043	0.03	0.035	-0.098	-0.058	-0.014	-0.022	0.997562	0.999706
Q6P5H2	Q6P5H2	Nes	Nestin	MOUSE	96	53.6	1356.09	0.252	0.007	0.109	0.085	-0.105	-0.046	0.052	0.049	0.750549	0.999706
Q5SQX6	Q5SQX6|F6QD74	Cyfip2	Cytoplasmic FMR1-interacting protein 2	MOUSE	90	70.4	1352.52	-0.008	-0.127	-0.147	-0.074	-0.003	0.046	0.048	-0.002	0.930044	0.999706
Q7TMB8	Q7TMB8|A0A0R4J119|A0A0U1RQ05|G3UZI5	Cyfip1	Cytoplasmic FMR1-interacting protein 1	MOUSE	73	60.8	1026.15	0	-0.023	-0.049	0.026	0.014	-0.005	0.002	0.049	0.8382	0.999706
Q6P5D8	Q6P5D8|A0A3B2WD81|A0A3B2W494	Smchd1	Structural maintenance of chromosomes flexible hinge domain-containing protein 1	MOUSE	105	59.1	1327.72	0.063	0.282	0.115	0.098	-0.119	-0.14	-0.089	-0.062	0.910239	0.999706
Q8BX70	Q8BX70|A0A1L1SUY8|A0A1L1SS63|A0A1L1SSJ3	Vps13c	Vacuolar protein sorting-associated protein 13C	MOUSE	103	33.6	1326.2	0.077	-0.08	-0.003	-0.017	0.01	0.022	0.087	0.085	0.784279	0.999706
G3X922	G3X922|D4AFX7|A0A087WRC9|A0A087WS25|A0A1L1STR9	Dnajc13	DnaJ heat shock protein family (Hsp40) member C13	MOUSE	98	48	1320.33	0.002	-0.069	-0.047	-0.015	-0.02	0.032	0.05	0.032	0.993077	0.999706
P70399	P70399|A0A5H1ZRL7|A2AU90|F6QNC8|F6ZRL3|F6S5E4|F6VCK5|F7CE65	Tp53bp1	TP53-binding protein 1	MOUSE	80	62.1	1309.68	0.047	-0.127	-0.063	-0.241	0.089	0.161	0.109	-0.148	0.118716	0.999706
Q8C0T5	Q8C0T5|Q4VBF8|A0A1Y7VJM1	Sipa1l1	Signal-induced proliferation-associated 1-like protein 1	MOUSE	98	60.2	1303.28	0.037	-0.143	-0.056	-0.324	0.087	0.073	0.09	-0.116	0.0663679	0.999706
G3X9J0	G3X9J0|S4R1S0|S4R2N4|S4R2C7|S4R1U8	Sipa1l3	Signal-induced proliferation-associated 1-like protein 3	MOUSE	55	34.7	649.53	0.077	-0.117	-0.046	-0.082	-0.02	0.019	0.035	0.065	0.903468	0.999706
Q80TE4	Q80TE4|A0A1D5RLY9	Sipa1l2	Signal-induced proliferation-associated 1-like protein 2	MOUSE	50	31.4	603.3	0.034	-0.062	-0.051	-0.086	0.023	0.102	-0.001	-0.034	0.694674	0.999706
A2AAE1	A2AAE1|A0A1D5RMC4|F6RPM4|F6YAT5|A2AB97|D6RI50|F6YB09|F6Q4Y5	Kiaa1109	Transmembrane protein KIAA1109	MOUSE	109	23.5	1300.21	-0.011	-0.059	-0.002	-0.078	0.011	0.065	-0.006	0.005	0.96377	0.999706
B0V2N1	B0V2N1|A0A286YDF6|A0A286YDS2|A0A286YEA4	Ptprs	Receptor-type tyrosine-protein phosphatase S	MOUSE	79	53.6	1298.9	-0.002	-0.011	0.108	-0.016	0	-0.034	-0.1	-0.004	0.996042	0.999706
G3UX60	G3UX60|Q64487|B9EJA3|E9PVW8|G3UWK6|G3UY75|G3UYU6|E9Q7I7|Q5SPA9|A0A1D5RLZ1|G3UXU8|G3UYR6|G3UX75	Ptprd	Protein-tyrosine-phosphatase	MOUSE	76	63.7	1210.61	0.029	-0.155	-0.031	-0.178	0.013	0.055	0.024	-0.043	0.489968	0.999706
A2A8L5	A2A8L5	Ptprf	Receptor-type tyrosine-protein phosphatase F	MOUSE	75	53.4	1135.42	0.057	-0.083	-0.096	-0.112	-0.081	0.048	0.078	-0.005	0.960464	0.999706
F6Y3V0	F6Y3V0	Ptprf	Protein-tyrosine-phosphatase (Fragment)	MOUSE	58	60.8	897.69	0.381	0.072	0.029	-0.145	-0.057	0.203	0.287	-0.056	0.406213	0.999706
A0A1Y7VNR5	A0A1Y7VNR5	Ptprf	Receptor-type tyrosine-protein phosphatase F (Fragment)	MOUSE	13	51.7	203.7	-0.06	0.051	0.009	-0.185	-0.028	-0.04	-0.126	-0.139	0.21147	0.999706
E9QQ10	E9QQ10|Q70FJ1|A0A140T8S1|A0A571BE77|H3BLL7|A0A0G2JFW0	Akap9	A-kinase anchor protein 9	MOUSE	112	31.3	1297.5	0.077	-0.166	-0.105	-0.18	0.008	0.07	0.107	-0.051	0.541314	0.999706
B1AQX9	B1AQX9|Q9QWI6|A0A571BG20|B1AQX8	Srcin1	SRC kinase-signaling inhibitor 1	MOUSE	92	74.2	1295.63	0.027	-0.165	-0.04	-0.142	0.025	0.018	0.043	-0.01	0.530441	0.999706
A0A140LHX7	A0A140LHX7	Srcin1	SRC kinase-signaling inhibitor 1 (Fragment)	MOUSE	6	58.7	77.35	0.096	0.046	0.043	0.017	-0.155	-0.225	-0.219	-0.029	0.76823	0.999706
Q4U2R1	Q4U2R1|A0A0U1RPZ3|A0A0U1RNG9|A0A0U1RP01	Herc2	E3 ubiquitin-protein ligase HERC2	MOUSE	112	26.5	1293.73	0.01	-0.045	-0.069	-0.181	0.05	0.07	0.029	-0.118	0.12269	0.999706
D3Z656	D3Z656|Q8CHC4|D3Z1M7|A0A338P6C7|F6VSS8|F6XIX0|A0A338P6V7	Synj1	Phosphoinositide 5-phosphatase	MOUSE	84	56.5	1276.36	-0.052	-0.233	-0.093	-0.061	0.078	0.088	0.087	0.152	0.772314	0.999706
F7BQW7	F7BQW7|E9Q7S0|F7CD11	Synj1	Phosphoinositide 5-phosphatase (Fragment)	MOUSE	83	67.7	1265.34	0.168	-0.052	0.221	0.041	0.061	0.042	0.096	0.045	0.196681	0.999706
A0A0J9YUN4	A0A0J9YUN4|A0A0J9YUE9|F6W8Z8|D6RH60	Dnm1	Dynamin GTPase	MOUSE	86	85.8	1272.68	-0.051	-0.169	-0.024	0.006	0.084	0.021	0.008	0.175	0.383201	0.999706
P39053	P39053	Dnm1	Dynamin-1	MOUSE	85	83.3	1250.73	-0.189	-0.254	-0.13	-0.096	0.066	-0.015	-0.076	0.062	0.483315	0.999706
Q8BZ98	Q8BZ98|E9QLL2|E0CXZ8|F2Z460	Dnm3	Dynamin-3	MOUSE	69	76.2	990.31	-0.059	-0.132	-0.001	0.024	0.021	-0.004	-0.031	0.138	0.375211	0.999706
G3X9G4	G3X9G4|Q3TCR7|G3UXX2|G3UY64	Dnm2	Dynamin GTPase	MOUSE	58	67.1	778.66	-0.158	0.16	0.13	0.129	0.056	0.17	0.062	-0.014	0.249354	0.999706
P39054	P39054|Q3T9X3|F8WIV5|G3UZZ3	Dnm2	Dynamin-2	MOUSE	57	66.3	766.69	-0.259	-0.02	-0.039	0.166	0.058	0.092	-0.098	0.109	0.276597	0.999706
F6RRH9	F6RRH9|F6TH70	Dnm1	Dynamin-1 (Fragment)	MOUSE	16	94.9	248.79	-0.204	0.481	-0.236	0.03	-0.218	0.085	0.105	-0.133	0.132467	0.999706
Q6ZQ08	Q6ZQ08|A0A1D5RMJ8|B7ZWL1|A0A1D5RMD8|A0A1D5RML9|A0A1D5RM04|A0A1D5RM03|A0A1D5RMB6	Cnot1	CCR4-NOT transcription complex subunit 1	MOUSE	96	46.8	1266.37	-0.025	0.004	-0.127	-0.111	0.004	0.052	-0.048	-0.053	0.270977	0.999706
A0A087WS23	A0A087WS23|A0A087WS04|A0A087WQG4|A0A087WS29|A0A087WQF8|A0A087WPY8|A0A087WR91	Ktn1	Kinectin	MOUSE	88	67.1	1264.05	0.024	0.107	-0.111	-0.148	-0.006	0.007	-0.042	-0.16	0.0825807	0.999706
F8VQC7	F8VQC7|A0A087WQ25|A0A087WRS1|Q61595	Ktn1	Kinectin	MOUSE	88	62.7	1243.65	0.033	0.138	-0.244	-0.065	-0.083	-0.009	0	0.005	0.531575	0.999706
Q99PL5	Q99PL5|A2AVJ7	Rrbp1	Ribosome-binding protein 1	MOUSE	93	49.9	1256.34	0.061	-0.192	-0.123	-0.265	0.036	0.108	0.024	-0.111	0.234148	0.999706
Q3V117	Q3V117|Q3TS02	Acly	ATP-citrate synthase	MOUSE	79	70.1	1254.15	-0.054	-0.076	0.073	0.096	0.097	0.04	-0.01	0.1	0.616267	0.999706
Q91V92	Q91V92	Acly	ATP-citrate synthase	MOUSE	79	70.3	1245.47	-0.01	-0.06	0.036	0.044	-0.095	-0.109	0.035	0.268	0.160186	0.999706
Q3UGY8	Q3UGY8|A0A1N9M5I8	Arfgef3	Brefeldin A-inhibited guanine nucleotide-exchange protein 3	MOUSE	85	48.2	1253.9	-0.017	-0.125	-0.105	-0.207	0.001	0.07	0.06	-0.082	0.364792	0.999706
A0A087WQ31	A0A087WQ31|A0A087WRE8|A0A087WP42|A0A087WRK0|A0A087WQ95|A0A087WNW8|A0A087WS18|J3QP81|E9QNY9|A0A0A6YXZ1|A0A0N4SUT7|A0A0A6YWK1|A0A0N4SVH2|A0A087WRU7	Clasp1	CLIP-associating protein 1	MOUSE	85	57.9	1226.28	-0.012	-0.17	-0.138	-0.114	0.022	0.063	0.047	-0.003	0.852696	0.999706
E9QKH0	E9QKH0|A0A087WQF1|E9Q6L0|Q80TV8	Clasp1	CLIP-associating protein 1	MOUSE	85	58.2	1213.05	0.063	0.133	0.091	0.077	-0.128	0.006	-0.089	0.046	0.625481	0.999706
F7DCH5	F7DCH5|A0A1L1SRY3	Clasp2	CLIP-associating protein 2	MOUSE	83	68	1249.55	-0.045	-0.088	-0.204	-0.272	-0.156	-0.046	0.128	-0.103	0.485041	0.999706
Q08EB5	Q08EB5	Clasp2	CLIP-associating protein 2	MOUSE	83	67.7	1243.57	0.062	-0.187	-0.057	-0.271	0.097	0.047	0.126	-0.034	0.176699	0.999706
Q08EB6	Q08EB6|Q8BRT1|E9Q8N5	Clasp2	CLIP-associating protein 2	MOUSE	83	67.8	1236.35	-0.311	0.008	-0.735	-0.196	-0.264	-0.034	-0.061	-0.322	0.19688	0.999706
A0A1L1ST22	A0A1L1ST22|Q8BSE7	Clasp2	CLIP-associating protein 2	MOUSE	31	56.1	472.4	-0.025	-0.055	-0.085	-0.116	0.183	0.162	-0.024	0.117	0.587039	0.999706
E9QAS4	E9QAS4|E9QAS5|Q6PDQ2|F6WR45	Chd4	DNA helicase	MOUSE	91	53.3	1248.08	0.03	0.17	0.069	0.101	-0.124	-0.129	-0.117	-0.097	0.940405	0.999706
B1AR17	B1AR17|E9Q614|F7C528|F6V4V3|A0A5F8MQ82|B0QZH7|B0QZH8	Chd3	DNA helicase	MOUSE	66	34.6	838.69	0.008	0.135	-0.029	-0.092	-0.036	0.005	0.007	-0.174	0.149642	0.999706
E9PYL1	E9PYL1|A2A8L1|E9PYU4	Chd5	DNA helicase	MOUSE	54	29.8	685.47	-0.027	-0.057	-0.076	-0.288	-0.032	0.037	-0.003	-0.273	0.0118125	0.999706
P11881	P11881|A0A0N4SWH7|A0A0N4SWI0|P70227|A0A0N4SVN2|A0A0N4SW22|A0A1D5RLA1	Itpr1	Inositol 1,4,5-trisphosphate receptor type 1	MOUSE	99	39.7	1245.18	0.028	-0.04	-0.048	-0.092	0.032	0.027	-0.016	-0.026	0.628539	0.999706
Q9Z329	Q9Z329|B2KF89|A0A0N4SUL2	Itpr2	Inositol 1,4,5-trisphosphate receptor type 2	MOUSE	44	17.5	525.45	0.184	0.325	0.114	0.163	-0.085	-0.036	-0.133	0.013	0.535113	0.999706
F8VPK5	F8VPK5|P70336|A0A1Y7VMN0|A0A1Y7VLD1	Rock2	Rho-associated protein kinase	MOUSE	96	65.6	1244.92	0.028	-0.158	-0.064	-0.1	0.055	0.09	0.032	0.074	0.906657	0.999706
P70335	P70335|A0A3Q4EGR2|A0A3Q4L2X0	Rock1	Rho-associated protein kinase 1	MOUSE	21	13.2	214.06	0.051	0.207	0.066	0.15	-0.111	-0.024	0.017	0.034	0.452205	0.999706
Q5SWZ5	Q5SWZ5|F6XZM9	Mprip	Myosin phosphatase Rho-interacting protein	MOUSE	92	50.1	1244.04	-0.076	-0.247	-0.163	-0.274	0.089	0.101	0.117	-0.021	0.533325	0.999706
P97434	P97434|F6S5I0|F6RND9	Mprip	Myosin phosphatase Rho-interacting protein	MOUSE	45	54.2	605.41	0.126	-0.217	-0.067	-0.125	0.177	0.274	0.213	-0.01	0.548631	0.999706
Q99KW3	Q99KW3|A0A2U3TZ82|G5E8W1|A0A2R8VI29|J9JI90|A0A2R8VI64	Triobp	TRIO and F-actin-binding protein	MOUSE	33	16.4	346.95	-0.11	-0.231	-0.151	-0.279	0.169	0.154	0.073	-0.113	0.32017	0.999706
Q02053	Q02053|P31254	Uba1	Ubiquitin-like modifier-activating enzyme 1	MOUSE	70	86.3	1243.38	-0.095	0.039	0.087	0.115	0.057	-0.074	-0.165	0.111	0.596392	0.999706
D3Z2Z1	D3Z2Z1|F8WIA1|D3Z3M7|Q922J3|F6RCU2|Q8C0S5|F7CB97|F6RAY2	Clip1	CAP-Gly domain-containing linker protein 1	MOUSE	93	63.1	1237.16	-0.037	-0.288	-0.147	-0.295	0.053	0.103	0.097	-0.025	0.504987	0.999706
Q9Z0H8	Q9Z0H8	Clip2	CAP-Gly domain-containing linker protein 2	MOUSE	84	70.5	1148.65	0.089	-0.195	-0.02	-0.076	0.009	0.05	0.076	0.083	0.732718	0.999706
Q6A065	Q6A065|H7BX26|A0A0A6YXK7|A0A0A6YX99|A0A0A6YVZ3|A0A0A6YXT4|A0A0A6YXR9|A0A0A6YWV9	Cep170	Centrosomal protein of 170 kDa	MOUSE	91	59.3	1236.88	0.011	-0.204	-0.082	-0.191	0.052	0.079	0.062	-0.01	0.584983	0.999706
Q80U49	Q80U49|B9EIX2	Cep170b	Centrosomal protein of 170 kDa protein B	MOUSE	78	58.3	1032.95	0.009	-0.2	-0.108	-0.225	0.047	0.063	0.1	-0.069	0.341264	0.999706
Q80TJ1	Q80TJ1|K4DI76|J3QJW3	Cadps	Calcium-dependent secretion activator 1	MOUSE	78	60.8	1232.92	-0.005	-0.129	-0.111	-0.096	-0.01	0.037	0.018	0.006	0.898433	0.999706
A0A286YDH6	A0A286YDH6	Cadps	Calcium-dependent secretion activator 1	MOUSE	50	63.6	830	0.054	-0.054	-0.051	0.082	0.017	0.092	-0.068	0.164	0.235311	0.999706
E9Q835	E9Q835|E9Q5C0|S4R1C6|Q8BYR5|A0A0M3HEP6|F6SH36	Cadps2	Calcium-dependent secretion activator 2	MOUSE	30	25.8	415.35	0.153	-0.094	-0.028	-0.003	0.001	0.015	-0.029	-0.019	0.594174	0.999706
A0A286YE00	A0A286YE00	Cadps	Calcium-dependent secretion activator 1 (Fragment)	MOUSE	25	63.1	375.03	-0.014	-0.072	-0.028	-0.054	-0.041	0.034	-0.185	0.015	0.672518	0.999706
E9PVC5	E9PVC5|E9Q9E1|Q6NZJ6|E9PVC6|A0A0J9YUS5|E9Q770|A0A0J9YUC1|A0A0J9YVC1|D3Z439|D3YWM1|A0A338P758|D3YWY7|A0A0J9YUL1|D6RCH1|D3YWC6|A0A338P7C5|A0A0J9YTV0|A0A0J9YU44	Eif4g1	Eukaryotic translation initiation factor 4 gamma 1	MOUSE	91	55.5	1231.01	-0.096	-0.239	-0.267	-0.309	0.101	0.106	-0.017	-0.113	0.202005	0.999706
A0A0R4J112	A0A0R4J112|Z4YKC4|A2AMI2|Q80XI3|A2AMI7|A2AMI6|Q8BQR8|A2AMI4	Eif4g3	Eukaryotic translation initiation factor 4 gamma 3	MOUSE	77	51.4	993.01	0.173	-0.536	0.085	-0.182	0.444	0.132	0.431	0.297	0.0871659	0.999706
A0A0N4SVL0	A0A0N4SVL0	Eif4g3	Eukaryotic translation initiation factor 4 gamma 3	MOUSE	77	45.4	987.6	-0.289	-0.414	-0.306	-0.599	-0.072	0.017	-0.151	-0.324	0.0309147	0.999706
P28738	P28738|A2ARD4	Kif5c	Kinesin heavy chain isoform 5C	MOUSE	84	79.4	1224.3	0.045	-0.145	-0.011	-0.045	0.052	0.062	0.084	0.097	0.767681	0.999706
Q61768	Q61768|E9QAK5	Kif5b	Kinesin-1 heavy chain	MOUSE	75	76.9	1129.66	0.048	-0.024	0.015	0.021	-0.066	-0.028	-0.001	0.023	0.947397	0.999706
P33175	P33175	Kif5a	Kinesin heavy chain isoform 5A	MOUSE	64	61.4	888.89	0.074	-0.149	0.016	-0.173	-0.035	0.028	-0.028	-0.151	0.252206	0.999706
E9QNN1	E9QNN1|Q3UR42|A0A087WRT3	Dhx9	DEAH box protein 9	MOUSE	77	65.7	1222.82	-0.052	0.082	0.029	-0.023	0.013	-0.013	0.005	-0.005	0.904271	0.999706
A0A087WPL5	A0A087WPL5|O70133|A0A0R4J2C3	Dhx9	DEAH box protein 9	MOUSE	77	65.7	1217.44	0.377	0.295	0.147	0.084	0.009	0.035	0.075	0.248	0.498131	0.999706
Q6ZPE2	Q6ZPE2|D6RG52|H3BKD9|F7AWK3|F6S251	Sbf1	Myotubularin-related protein 5	MOUSE	87	53.1	1217.24	-0.025	-0.101	-0.005	-0.044	0.035	0.055	0.054	0.023	0.956155	0.999706
E9PXF8	E9PXF8|E9Q0D4|F6ZDC5|F6QG63|F7BBM8|E9Q372|F6QZ02|E9Q4I8	Sbf2	Myotubularin-related protein 13	MOUSE	57	33.6	701.71	0.012	-0.015	0.002	-0.016	-0.001	-0.048	-0.01	-0.007	0.962537	0.999706
P60469	P60469|A0A1B0GRM4|S4R1I7	Ppfia3	Liprin-alpha-3	MOUSE	94	65.4	1210.96	-0.002	-0.157	-0.037	-0.062	0.034	0.009	0.033	0.039	0.704939	0.999706
B8QI34	B8QI34|F7CYX4|Q8BSS9	Ppfia2	Liprin-alpha-2	MOUSE	86	61.1	1141.24	-0.008	-0.198	-0.003	-0.132	0.042	0.063	0.048	0	0.66652	0.999706
B8QI36	B8QI36|A0A087WPM2	Ppfia4	Liprin-alpha 4	MOUSE	61	49	701.79	0.028	-0.206	0.073	-0.141	0.091	0.09	0.19	0.144	0.420726	0.999706
B2RXQ2	B2RXQ2|B2RXW8	Ppfia1	Ppfia1 protein	MOUSE	54	34.1	623.28	0.053	-0.093	-0.1	-0.078	0.05	0.056	0.084	0.049	0.877598	0.999706
A0A087WPJ3	A0A087WPJ3	Ppfia4	Protein tyrosine phosphatase, receptor type, f polypeptide (PTPRF),-interacting protein (liprin), alpha 4 (Fragment)	MOUSE	41	40.5	467.63	-0.082	0.196	0.316	0.179	-0.023	-0.032	-0.254	-0.118	0.926773	0.999706
G3X9H5	G3X9H5|P42859	Htt	Huntingtin	MOUSE	91	34	1209.8	0.006	-0.078	-0.056	-0.015	-0.055	0.037	0.008	0.047	0.956738	0.999706
Q6P5E4	Q6P5E4|G3UYG7|G3UZU8|G3UY73|G3UY35	Uggt1	UDP-glucose:glycoprotein glucosyltransferase 1	MOUSE	76	59.6	1187.56	-0.065	-0.093	0.012	-0.089	0.01	-0.008	-0.108	-0.037	0.866631	0.999706
Q6ZQ38	Q6ZQ38|D3YWC5	Cand1	Cullin-associated NEDD8-dissociated protein 1	MOUSE	73	72.3	1186.42	-0.003	-0.131	-0.056	-0.004	0.025	0.054	0.043	0.106	0.786625	0.999706
Q8BL66	Q8BL66|A0A1W2P7A6	Eea1	Early endosome antigen 1	MOUSE	86	60.5	1182.67	0.012	-0.228	-0.127	-0.232	0.08	0.106	0.109	0.001	0.564668	0.999706
Q6P5U7	Q6P5U7|A0A0G2JGP2|E0CY00	Nwd2	NACHT and WD repeat domain-containing protein 2	MOUSE	82	55.5	1176.29	-0.091	-0.286	-0.169	-0.203	0.131	0.145	0.114	0.04	0.850587	0.999706
Q3U2G2	Q3U2G2|Q61316	Hspa4	Heat shock 70 kDa protein 4	MOUSE	73	84.9	1175.64	-0.037	-0.198	-0.042	-0.023	0.028	-0.02	0.002	0.079	0.395938	0.999706
P48722	P48722|E0CY23|A0A0N4SVU2	Hspa4l	Heat shock 70 kDa protein 4L	MOUSE	66	79.8	947.64	-0.003	-0.155	-0.042	-0.055	0.072	0.013	0.007	0.043	0.636632	0.999706
Q61699	Q61699|E9Q0U7|D3Z3I9|A0A0J9YTZ7|D3Z027	Hsph1	Heat shock protein 105 kDa	MOUSE	63	77.6	986.99	-0.045	-0.154	-0.05	-0.069	0.057	0.064	0.022	0.086	0.942861	0.999706
A0A5F8MPU7	A0A5F8MPU7|A0A5F8MPN4|Q8CJ19|A0A5F8MPF3|A0A0N4SWA5|A0A1D5RM34|A0A0N4SVV2|A0A1D5RME9|A0A0N4SV64|A0A0N4SUZ1|A0A140LJA5|A0A140LID8	Mical3	F-actin monooxygenase	MOUSE	89	43.8	1171.28	0.028	-0.125	-0.051	-0.049	-0.011	0.041	0.009	0.046	0.947925	0.999706
Q8BML1	Q8BML1	Mical2	[F-actin]-monooxygenase MICAL2	MOUSE	8	8.2	82.75	-0.039	-0.278	-0.348	-0.47	0.128	0.018	0.055	-0.293	0.0343569	0.999706
Q64514	Q64514|A0A087WRC0|Q05DJ9|A0A087WQR6|A0A087WP19	Tpp2	Tripeptidyl-peptidase 2	MOUSE	76	66.3	1157.45	0.027	-0.152	-0.021	-0.102	0.031	0.064	-0.003	0.024	0.86595	0.999706
B2RQ80	B2RQ80|E0CY98|E9PUL9|E0CZD7|E0CYV5	Tnik	Tnik protein	MOUSE	88	59.6	1152.59	0.015	-0.189	-0.062	-0.106	0.025	0.038	0.016	-0.031	0.649835	0.999706
B9EKN8	B9EKN8|E0CXD6|P83510|E0CZF8	Tnik	TRAF2 and NCK interacting kinase	MOUSE	86	59.3	1131.62	0.158	-0.058	0.086	-0.084	-0.335	-0.183	-0.19	-0.011	0.894895	0.999706
A0A0A6YW53	A0A0A6YW53|E9PVG7|A0A0A6YWR8|B7ZNR9|P97820|A0A0A6YVZ8|A0A0A6YWJ2	Map4k4	Mitogen-activated protein kinase kinase kinase kinase 4	MOUSE	77	52.8	982.01	0.169	-0.147	0.058	-0.093	0.079	0.068	0.083	0.128	0.500596	0.999706
F8VPL5	F8VPL5	Map4k4	Mitogen-activated protein kinase kinase kinase kinase 4	MOUSE	72	50.8	909.43	-0.047	0.007	0.077	-0.026	0.141	-0.179	-0.052	0.13	0.713635	0.999706
A0A0A6YWM8	A0A0A6YWM8	Map4k4	Mitogen-activated protein kinase kinase kinase kinase 4	MOUSE	70	48.2	893.85	0.165	-0.135	-0.153	-0.116	0.086	0.161	0.17	0.048	0.703393	0.999706
Q9JM52	Q9JM52|G3X9G2|F7AMS7|J3QP32	Mink1	Misshapen-like kinase 1	MOUSE	62	42.1	777.65	-0.228	-0.229	-0.519	-0.228	-0.215	-0.005	-0.101	-0.363	0.152444	0.999706
Q5SXG3	Q5SXG3|Q5SXG1	Mink1	Misshapen-like kinase 1	MOUSE	59	40.1	745.93	0.286	-0.056	0.146	0.211	-0.115	0.059	-0.063	0.144	0.58555	0.999706
J3QM71	J3QM71	Mink1	Misshapen-like kinase 1 (Fragment)	MOUSE	21	59.8	221.09	-0.353	-0.378	-0.028	0.112	0.415	0	0.307	0.116	0.511107	0.999706
Q9Z1B3	Q9Z1B3|A0A0J9YUY5	Plcb1	1-phosphatidylinositol 4,5-bisphosphate phosphodiesterase beta-1	MOUSE	73	61.1	1152.29	-0.084	-0.239	-0.076	-0.141	0.112	0.086	-0.009	0.054	0.851371	0.999706
A2A9M4	A2A9M4|E9PX48|Q8R1A4|A2A9M5|A0A0U1RNK7|A0A0U1RNY4|A0A1L1SQR4|Q8VDR9|F6ZJ55|A2AW79|A0A0U1RP53|A0A1L1ST98|A0A0U1RPH6	Dock7	Dedicator of cytokinesis protein 7	MOUSE	91	47.7	1145.11	0.012	0.057	0.024	-0.003	-0.013	-0.036	-0.043	-0.002	0.998011	0.999706
Q8C147	Q8C147	Dock8	Dedicator of cytokinesis protein 8	MOUSE	5	2.3	49.31	-0.33	-0.52	-0.135	-0.222	0.298	0.125	-0.038	-0.24	0.669116	0.999706
Q07113	Q07113	Igf2r	Cation-independent mannose-6-phosphate receptor	MOUSE	79	39.3	1139.01	-0.045	0.004	-0.117	-0.093	0.029	-0.015	-0.116	-0.109	0.197399	0.999706
P58252	P58252	Eef2	Elongation factor 2	MOUSE	72	79	1135.47	-0.081	0.023	0.048	0.06	0.074	-0.024	-0.061	0.038	0.939373	0.999706
A2AH85	A2AH85|O08810|G3UZ34|G3UXK8	Eftud2	116 kDa U5 small nuclear ribonucleoprotein component	MOUSE	56	68.8	908.08	-0.077	-0.001	0.014	-0.046	0.016	0.009	0.002	-0.017	0.920446	0.999706
Q3UH93	Q3UH93|F6T0L5	Plxnd1	Plexin-D1	MOUSE	78	47.6	1133.09	0.139	0.134	0.15	0.118	-0.135	-0.128	-0.145	-0.055	0.99605	0.999706
Q99P72	Q99P72	Rtn4	Reticulon-4	MOUSE	64	66	1131.33	0.006	-0.173	-0.08	-0.223	-0.001	0.044	0.027	-0.091	0.294913	0.999706
Q3UNH4	Q3UNH4	Gprin1	G protein-regulated inducer of neurite outgrowth 1	MOUSE	83	80.2	1128.12	0.098	-0.095	-0.043	-0.223	0.008	-0.009	-0.018	-0.14	0.0817158	0.999706
A0A1D5RLL4	A0A1D5RLL4|E9PWT1|E9QLK7|E9PZA7|Q80YV3|D3YY11	Trrap	Transformation/transcription domain-associated protein	MOUSE	90	27	1125.12	0.008	0.18	-0.01	-0.03	-0.046	0.014	0.03	-0.086	0.355406	0.999706
F7CGG2	F7CGG2	Trrap	Transformation/transcription domain-associated protein (Fragment)	MOUSE	84	27.3	1066.72	-0.089	0.015	0.077	0.009	0.127	0.051	0.134	0.088	0.627439	0.999706
Q8CIE6	Q8CIE6|F8WHL2|F6XJN3	Copa	Coatomer subunit alpha	MOUSE	78	70.6	1123.72	-0.068	0.023	-0.178	-0.039	0.022	0.073	-0.024	-0.048	0.343225	0.999706
Q69ZK0	Q69ZK0|I7HPV9	Prex1	Phosphatidylinositol 3,4,5-trisphosphate-dependent Rac exchanger 1 protein	MOUSE	82	56	1123.1	0.135	0.059	0.161	0.2	-0.047	-0.016	0.064	0.145	0.148371	0.999706
Q6ZPJ3	Q6ZPJ3	Ube2o	(E3-independent) E2 ubiquitin-conjugating enzyme UBE2O	MOUSE	73	68	1122.97	0.019	-0.13	-0.006	-0.05	0.072	0.062	0.053	0.035	0.813008	0.999706
Q9DBG3	Q9DBG3|H3BKM0|H3BIY9|H3BJ06	Ap2b1	AP-2 complex subunit beta	MOUSE	65	70.8	1121.03	-0.056	-0.172	-0.029	-0.066	0.036	0.004	-0.035	0.052	0.742918	0.999706
O35643	O35643|Q5SVG4|Q5SVG5	Ap1b1	AP-1 complex subunit beta-1	MOUSE	61	68.7	1001.4	-0.059	-0.166	0.016	-0.05	0.024	0.012	-0.079	0.083	0.807235	0.999706
A0A140LJ04	A0A140LJ04|E9Q5W5|Q5SSH7	Zzef1	Zinc finger ZZ-type and EF-hand domain-containing protein 1	MOUSE	86	33.4	1118.79	0.091	0.02	-0.017	0.076	-0.07	-0.01	0.034	0.03	0.932152	0.999706
G5E829	G5E829|A0A1W2P7C7|A0A1W2P867|A0A1W2P7R3|A0A1W2P6X7	Atp2b1	Plasma membrane calcium-transporting ATPase 1	MOUSE	74	54.9	1118.37	0.06	0.002	-0.007	-0.073	0.029	0.033	0.007	-0.052	0.486723	0.999706
F8WHB1	F8WHB1|Q9R0K7|Q3UHH0	Atp2b2	Calcium-transporting ATPase	MOUSE	68	55.6	1032.81	0.184	0.161	0.146	-0.149	-0.067	-0.023	-0.031	-0.155	0.16772	0.999706
E9Q828	E9Q828	Atp2b4	Calcium-transporting ATPase	MOUSE	68	54.4	987.67	0.284	0.126	0.294	0.172	-0.098	-0.085	0.168	0.019	0.236176	0.999706
F7AAP4	F7AAP4	Atp2b4	Calcium-transporting ATPase	MOUSE	68	54.5	982.73	0.304	0.206	0.304	0.099	-0.201	-0.235	-0.035	-0.168	0.732547	0.999706
Q6Q477	Q6Q477	Atp2b4	Plasma membrane calcium-transporting ATPase 4	MOUSE	65	52.6	932.69	-0.054	-0.062	-0.248	-0.207	-0.284	-0.036	-0.059	-0.116	0.325657	0.999706
Q0VF55	Q0VF55|Q8C048	Atp2b3	Calcium-transporting ATPase	MOUSE	63	51.1	942.69	-0.075	-0.008	-0.005	-0.115	-0.162	-0.274	-0.274	-0.366	0.186796	0.999706
S4R1C4	S4R1C4	Atp2b2	Calcium-transporting ATPase	MOUSE	62	53.6	933.59	0.147	0.234	0.025	0.021	-0.18	-0.054	-0.12	-0.16	0.564523	0.999706
A2ALL9	A2ALL9	Atp2b3	Calcium-transporting ATPase	MOUSE	62	53.3	933.24	0.084	0.017	-0.101	-0.041	-0.085	-0.08	-0.133	-0.201	0.282009	0.999706
A0A1W2P772	A0A1W2P772|A0A1W2P882	Atp2b1	Plasma membrane calcium-transporting ATPase 1 (Fragment)	MOUSE	13	41.6	194.03	0.15	0.02	0.218	0.078	0.009	0.01	0.026	0.234	0.397085	0.999706
D3Z5K8	D3Z5K8|A0A1L1SQP7	Shank2	SH3 and multiple ankyrin repeat domains protein 2	MOUSE	81	55.5	1117.39	0.04	-0.157	-0.042	-0.188	-0.003	0.03	0.018	-0.029	0.509686	0.999706
A0A6I8MWY3	A0A6I8MWY3	Shank2	SH3 and multiple ankyrin repeat domains protein 2	MOUSE	70	70.1	981.64	0.177	-0.126	0.098	-0.03	-0.036	-0.175	0.024	-0.046	0.104642	0.999706
A0A1C7ZMY3	A0A1C7ZMY3	Shank2	SH3 and multiple ankyrin repeat domains protein 2	MOUSE	68	71.2	973.72	-0.054	-0.252	-0.071	0.013	0.051	0.068	-0.054	0.241	0.307092	0.999706
Q4ACU6	Q4ACU6|A0A589M675|A0A2R8VH81|A0A571BEU3|A0A668KMA7	Shank3	SH3 and multiple ankyrin repeat domains protein 3	MOUSE	67	47.3	832.23	-0.012	-0.057	0.021	-0.12	0.092	0.098	0.076	0.126	0.946297	0.999706
E9Q1P5	E9Q1P5	Shank3	SH3 and multiple ankyrin repeat domains protein 3 (Fragment)	MOUSE	3	31.8	40.17	0.029	-0.022	-0.085	-0.153	0.141	-0.013	-0.052	-0.154	0.0524604	0.999706
Q8CI94	Q8CI94	Pygb	Glycogen phosphorylase, brain form	MOUSE	73	75.5	1114.86	0.035	-0.05	0.06	0.092	0.037	0.017	0.033	0.11	0.359148	0.999706
Q9WUB3	Q9WUB3|E9PUM3	Pygm	Glycogen phosphorylase, muscle form	MOUSE	28	28	341.39	0.188	0.11	0.06	0.125	-0.092	0.098	0.111	0.157	0.545355	0.999706
Q9ET01	Q9ET01|Q3UEJ6	Pygl	Glycogen phosphorylase, liver form	MOUSE	20	16.9	217.62	-0.154	0.309	0.084	0.194	-0.002	-0.048	-0.08	0.148	0.303308	0.999706
Q8VDJ3	Q8VDJ3|A0A087WP83|A0A087WS92|A0A087WPC5|A0A087WQY9|A0A087WPH2|A0A087WNQ4	Hdlbp	Vigilin	MOUSE	77	64.5	1108.5	-0.062	-0.263	-0.217	-0.286	0.065	0.138	0.011	-0.125	0.311653	0.999706
P17426	P17426|A0A140LIG7|A0A140LHA6|A0A140LHG0	Ap2a1	AP-2 complex subunit alpha-1	MOUSE	66	76.7	1107.98	-0.071	-0.113	0.026	-0.042	0.033	-0.031	-0.076	0.015	0.852853	0.999706
P17427	P17427|A0A0J9YUA7	Ap2a2	AP-2 complex subunit alpha-2	MOUSE	65	79.5	1068.74	-0.124	-0.117	-0.021	-0.044	0.071	-0.07	-0.149	0.019	0.690267	0.999706
Q9CU62	Q9CU62	Smc1a	Structural maintenance of chromosomes protein 1A	MOUSE	87	67.8	1104.73	0.002	0.051	0.015	0.045	-0.089	-0.084	-0.024	-0.005	0.882679	0.999706
Q6PIE5	Q6PIE5|D3YYN7|Q9WV27|E9QNX7|Q64436|Q91WH7	Atp1a2	Sodium/potassium-transporting ATPase subunit alpha-2	MOUSE	68	58.9	1067.35	0.011	0.153	0.059	0.09	-0.014	-0.039	-0.054	0.007	0.834038	0.999706
A0A0G2JGX4	A0A0G2JGX4|Q6PIC6|Q8VCE0	Atp1a3	Sodium/potassium-transporting ATPase subunit alpha	MOUSE	65	59.4	1098.19	0.109	0.093	0.124	0.086	-0.008	0.011	-0.01	0.078	0.711413	0.999706
Q8VDN2	Q8VDN2	Atp1a1	Sodium/potassium-transporting ATPase subunit alpha-1	MOUSE	65	55.6	984.05	0.03	-0.058	-0.004	-0.073	0.077	0.088	0.094	0.095	0.898237	0.999706
Q9Z1W8	Q9Z1W8	Atp12a	Potassium-transporting ATPase alpha chain 2	MOUSE	9	7.3	114.22	1.083	-1.413	-1.49	-1.591	-0.029	1.59	2.061	1.015	0.961955	0.999706
E9QKH8	E9QKH8|O35927|B7ZNF6|A0A2I3BQV7|A0A2I3BQV6	Ctnnd2	Catenin delta-2	MOUSE	68	72.3	1097.13	-0.001	-0.092	-0.029	-0.112	-0.015	-0.048	-0.085	-0.064	0.48259	0.999706
Q68FH0	Q68FH0|A2AS45|A2AS47|A2AS44|V9GXG7	Pkp4	Plakophilin-4	MOUSE	51	48.9	703.65	-0.028	-0.097	-0.046	-0.181	0.021	0.067	0.059	-0.019	0.558704	0.999706
E9Q7X7	E9Q7X7|E9PUM9|A0A494B8Y4|E9Q5N7|E9PUN0|E9PUN2|E9PUN1|F6Y027|A0A140LI71	Nrxn2	Neurexin-2	MOUSE	72	49.4	1093.13	0.125	0.058	0.074	-0.071	-0.049	-0.018	-0.073	-0.107	0.484472	0.999706
Q9CS84	Q9CS84|E0CY11|P0DI97|A0A0H2UH29|E0CZA5|A0A0G2JE65|A0A0G2JES8|A0A0G2JE40|G3UWQ9	Nrxn1	Neurexin-1	MOUSE	65	50.6	1056.1	0.003	0.013	0.022	-0.199	0.002	0.021	-0.043	-0.199	0.0345187	0.999706
Q6P9K9	Q6P9K9|E9Q2X2|A0A087WPQ9|Q8C985|A0A5F8MPQ9|E9Q3Q4	Nrxn3	Neurexin-3	MOUSE	54	41.1	806.41	-0.022	-0.082	-0.06	-0.181	0.077	0.089	0.057	-0.04	0.379711	0.999706
H3BK41	H3BK41	Nrxn1	Neurexin-1 (Fragment)	MOUSE	13	57.7	188.89	2.845	0.129	-0.293	-0.065	0.331	1.292	3.204	0.496	0.554642	0.999706
Q91YM2	Q91YM2	Arhgap35	Rho GTPase-activating protein 35	MOUSE	82	59.3	1087.96	-0.023	0.006	-0.013	0.029	0.037	-0.014	-0.097	0.04	0.709391	0.999706
Q8CAQ8	Q8CAQ8|A0A0U1RQ14	Immt	MICOS complex subunit Mic60	MOUSE	71	85.3	1081.86	0.013	0.416	0.167	0.343	-0.105	-0.174	-0.315	-0.145	0.71095	0.999706
E9Q800	E9Q800|E9QAY6	Immt	MICOS complex subunit MIC60	MOUSE	66	83.6	986.04	-0.049	0.377	0.289	0.301	-0.054	-0.027	0.016	0.193	0.139449	0.999706
A0A0U1RP81	A0A0U1RP81	Immt	MICOS complex subunit MIC60	MOUSE	47	79.7	701.1	0.084	0.567	0.057	0.329	-0.517	-0.386	-0.454	-0.337	0.599173	0.999706
E9PVS5	E9PVS5	Immt	MICOS complex subunit MIC60 (Fragment)	MOUSE	12	76	187.47	-0.188	0.348	-0.146	0.179	0.061	0.004	-0.252	-0.086	0.218974	0.999706
Q8VDM4	Q8VDM4|A0A338P6M5|A0A338P7H4|A0A338P6S9|E9Q2S8	Psmd2	26S proteasome non-ATPase regulatory subunit 2	MOUSE	67	84.5	1079	-0.073	-0.112	-0.054	0.045	0.009	-0.003	-0.094	0.084	0.317005	0.999706
Q9QZC2	Q9QZC2	Plxnc1	Plexin-C1	MOUSE	77	53.8	1074.1	0.053	0.028	0.073	0.011	-0.006	0.002	-0.034	0.01	0.992477	0.999706
B2RXS4	B2RXS4	Plxnb2	Plexin-B2	MOUSE	72	50.2	1073.8	0.05	0.125	0.07	0.103	-0.064	-0.028	-0.073	0.007	0.792004	0.999706
F8VPN4	F8VPN4|A0A0G2JGI9|F6XXE6|E0CYU6|F7CSZ6|E0CX86	Agl	4-alpha-glucanotransferase	MOUSE	77	63	1072.5	0.025	0.033	0.038	0.085	-0.004	-0.046	0.008	0.047	0.723723	0.999706
Q8R0Y6	Q8R0Y6|A0A0N4SW56|A0A0N4SVT2	Aldh1l1	Cytosolic 10-formyltetrahydrofolate dehydrogenase	MOUSE	66	88.1	1070.1	0.093	0.061	0.189	0.282	-0.031	-0.133	-0.097	0.069	0.247639	0.999706
Q8K009	Q8K009|D3Z6B9	Aldh1l2	Mitochondrial 10-formyltetrahydrofolate dehydrogenase	MOUSE	52	67.3	718.54	-0.099	0.416	0.045	0.224	-0.042	-0.148	-0.318	-0.082	0.512186	0.999706
Q6PDI5	Q6PDI5|A2ALV7|A2ALV6|A2ALV8|A2ALW1|A2ALV9	Ecpas	Proteasome adapter and scaffold protein ECM29	MOUSE	73	48.3	1069.54	0.016	0.042	-0.088	0.024	0.023	0.036	0.034	0.056	0.789024	0.999706
Q8BGQ7	Q8BGQ7	Aars1	Alanine--tRNA ligase, cytoplasmic	MOUSE	69	73.9	1068.35	0.024	-0.01	0.076	0.074	0.004	0.006	-0.018	0.094	0.61038	0.999706
A2A5R2	A2A5R2|F6YCJ0	Arfgef2	Brefeldin A-inhibited guanine nucleotide-exchange protein 2	MOUSE	76	50	1068.15	0.027	-0.048	-0.108	0.019	-0.003	0.098	0.057	0.059	0.915503	0.999706
G3X9K3	G3X9K3|D3YYK9	Arfgef1	Brefeldin A-inhibited guanine nucleotide-exchange protein 1	MOUSE	76	45.6	1044.63	-0.029	-0.103	-0.152	-0.051	-0.02	0.066	0.049	0.009	0.962533	0.999706
P17710	P17710|G3UVV4|D3Z365|D3YYR4|D3Z105|B4YB29	Hk1	Hexokinase-1	MOUSE	69	65.1	1068.04	0.045	0.02	0.042	0.043	0.043	0.041	0.006	0	0.929253	0.999706
O08528	O08528|E9Q5B5|Q3TRM8|E9Q8S8|E9Q3Z4|E9Q9M6	Hk2	Hexokinase-2	MOUSE	55	63.4	762.38	-0.075	-0.169	-0.189	-0.315	0.134	0.193	0.016	-0.104	0.186799	0.999706
Q91W97	Q91W97	Hkdc1	Hexokinase HKDC1	MOUSE	13	10.1	124.11	0.033	0.154	-0.026	0.059	0.138	-0.065	-0.02	0.106	0.637461	0.999706
Q920I9	Q920I9|Q8C711|A0A494B9P4|A0A494B9S5	Wdr7	WD repeat-containing protein 7	MOUSE	70	59.1	1066.91	0.021	-0.11	0.009	0.003	0.021	0.026	0.018	0.06	0.806172	0.999706
Q7TSJ2	Q7TSJ2|A0A140LIT9|D3Z6W1	Map6	Microtubule-associated protein 6	MOUSE	77	82.7	1065.16	0.045	-0.193	-0.041	-0.159	0.044	0.063	0.101	0.011	0.561934	0.999706
P58281	P58281|H7BX01|E0CXD1|F6U775	Opa1	Dynamin-like 120 kDa protein, mitochondrial	MOUSE	70	69.5	1063.51	-0.046	0.058	0.124	0.044	-0.033	-0.064	-0.184	-0.056	0.98518	0.999706
E9QMR2	E9QMR2|F8VPN7|A0A1D5RMM1|A0A5F8MPL9|Q8BIK4|A0A1D5RLE0|A0A1D5RLB8|A0A571BG77	Dock9	Dedicator of cytokinesis protein 9	MOUSE	78	43.1	1056.31	0.115	0	0.088	0.016	-0.035	-0.008	0.024	-0.014	0.819904	0.999706
A2AF47	A2AF47|A2AF65	Dock11	Dedicator of cytokinesis protein 11	MOUSE	41	20.2	454.68	0.028	0.233	0.006	0.041	-0.182	-0.083	0.026	-0.107	0.644705	0.999706
A2AF67	A2AF67	Dock11	Dedicator of cytokinesis protein 11	MOUSE	36	19.4	389.29	-0.541	0.255	0.352	0.332	0.367	-0.394	-0.164	-0.01	0.93793	0.999706
E9QM99	E9QM99|Q8BZN6|A0A087WQ86|A0A087WRP5|A0A087WQA1|Q8BLX9|A0A087WS26	Dock10	Dedicator of cytokinesis protein 10	MOUSE	19	9.4	209.96	-0.079	0.177	-0.052	-0.058	-0.018	-0.086	-0.036	-0.061	0.748197	0.999706
A0A0R4J2B7	A0A0R4J2B7	Dock10	Dedicator of cytokinesis protein 10 (Fragment)	MOUSE	16	9.4	180.41	-0.036	-0.307	-0.118	-0.24	-0.036	-0.027	-0.2	-0.264	0.121345	0.999706
E9QN47	E9QN47|Q80U28|A2AGR0|A0A0R4J1F4|A2AGQ6|A2AGQ4|A2AGQ5|A2AGQ9|A2AGQ7|A2AGQ2|A6PWP8|A6PWP7	Madd	MAP kinase-activating death domain protein	MOUSE	76	50.5	1055.62	-0.027	-0.124	-0.029	-0.061	0.05	0.026	0.03	0.056	0.891988	0.999706
A2AGQ8	A2AGQ8|A2AGQ3|A2AGR1	Madd	MAP kinase-activating death domain protein	MOUSE	69	48.2	968.62	-0.367	-0.094	-0.057	-0.003	0.456	0.131	0.059	0.134	0.994636	0.999706
Q3TLH4	Q3TLH4|A0A0A0MQ79|S4R2J9|S4R209|S4R2L9|S4R298	Prrc2c	Protein PRRC2C	MOUSE	91	34.8	1055.59	-0.031	-0.269	-0.264	-0.431	0.125	0.146	0.037	-0.207	0.0783751	0.999706
S4R294	S4R294	Prrc2c	Protein PRRC2C	MOUSE	85	33.7	978	-0.42	-0.673	-0.322	-0.668	0.25	0.562	0.299	-0.154	0.562656	0.999706
Q7TSC1	Q7TSC1|G3UX48	Prrc2a	Protein PRRC2A	MOUSE	57	33.6	677.49	-0.029	-0.217	-0.194	-0.362	0.045	0.099	0.058	-0.159	0.124091	0.999706
F8WHT3	F8WHT3|Q7TPM1|F7AYW2|F6Q3E1|F6V431	Prrc2b	Protein PRRC2B	MOUSE	46	24	517.73	-0.051	-0.302	-0.247	-0.443	0.04	0.081	-0.045	-0.24	0.0567983	0.999706
S4R2E2	S4R2E2	Prrc2c	Protein PRRC2C (Fragment)	MOUSE	26	53.5	327.61	0.163	-0.577	-0.187	-0.546	-0.077	0.027	-0.115	-0.393	0.108678	0.999706
A2AS98	A2AS98|P28660|Q8K1X4	Nckap1	Nck-associated protein 1	MOUSE	71	59.3	1054.93	0.047	-0.131	-0.108	-0.07	0.03	0.07	0.083	0.077	0.936273	0.999706
V9GWT6	V9GWT6	Erc1	ELKS/Rab6-interacting/CAST family member 1	MOUSE	81	66.3	1048.48	0.044	-0.227	-0.047	-0.19	0.079	0.088	0.112	0.063	0.615068	0.999706
V9GXH3	V9GXH3|F8VPM7|Q99MI1|V9GXP8|V9GXF0|V9GX53|V9GXL1	Erc1	ELKS/Rab6-interacting/CAST family member 1	MOUSE	81	64.1	1037.41	0.099	-0.071	-0.007	-0.116	-0.086	-0.054	0.126	0.102	0.82264	0.999706
Q3UHT7	Q3UHT7|A0A1B0GSU7|A0A1B0GSQ8	Erc2	ERC protein 2	MOUSE	76	63.6	929.11	-0.067	0.164	0.536	0.136	-0.246	-0.243	-0.158	-0.008	0.414258	0.999706
Q6PH08	Q6PH08|A0A1B0GS69	Erc2	ERC protein 2	MOUSE	75	63.2	914.66	0.095	-0.195	-0.009	0.028	0.064	0.022	0.016	0.121	0.303877	0.999706
Q8K310	Q8K310|A0A494BAD4|A0A494BAZ7|A0A494BAZ2|A0A494B9X1|A0A494B9B1|A0A494BAC5|A0A494BAL7|A0A494B8Y5|A0A494B9C9|A0A494B9Q4|A0A494BB50	Matr3	Matrin-3	MOUSE	68	65.2	1042.19	-0.077	-0.079	-0.109	-0.211	0.074	0.069	-0.026	-0.147	0.120277	0.999706
A0A494B968	A0A494B968	Matr3	Matrin-3 (Fragment)	MOUSE	4	83.3	63.79	1.355	-0.199	-0.282	-0.418	0.248	0.857	1.288	0.509	0.612971	0.999706
F8VPQ1	F8VPQ1|Q8CIQ7|F6VMI1|F6YXW9|F7CVM6|F7AGL4	Dock3	Dedicator of cytokinesis protein 3	MOUSE	84	40.8	1041.8	0.007	-0.096	-0.104	-0.042	-0.036	0.016	-0.072	-0.065	0.639911	0.999706
P59764	P59764|A0A1Y7VLY2	Dock4	Dedicator of cytokinesis protein 4	MOUSE	65	36.4	810.34	-0.016	-0.077	-0.073	0.068	-0.007	0.07	0.049	0.125	0.486466	0.999706
F6SEU4	F6SEU4|A0A2R8VHH2|J3QQ18|A0A0A6YVS6|A0A0J9YUM2|A0A140T8K9|A0A0J9YVH8|A0A338P799|A0A2R8VH83|A0A0J9YUZ2|A0A0J9YUZ5|A0A0J9YV63|A0A0J9YUY7	Syngap1	Ras/Rap GTPase-activating protein SynGAP	MOUSE	75	57.8	1041.49	-0.054	-0.166	0.003	-0.077	0.177	0.252	0.296	0.226	0.702644	0.999706
Q3UHC7	Q3UHC7|A2AUX3|A2AUX5|F6RK07|F6QQP6	Dab2ip	Disabled homolog 2-interacting protein	MOUSE	62	58.9	842.37	0.061	-0.523	-0.218	-0.371	-0.138	0.078	-0.098	-0.299	0.325193	0.999706
B7ZD29	B7ZD29	Dab2ip	Disabled homolog 2-interacting protein	MOUSE	60	59.9	819.74	-0.284	-0.142	0.06	-0.11	0.068	-0.047	-0.224	0.276	0.733141	0.999706
E9PW37	E9PW37|D3YUS5|D3YWZ9|D3Z1T6	Rasal2	RAS protein activator-like 2	MOUSE	51	39.6	611.94	-0.025	-0.236	-0.233	-0.434	0.112	0.187	0.123	-0.082	0.227214	0.999706
P12960	P12960	Cntn1	Contactin-1	MOUSE	62	67.8	1038.58	0.027	-0.03	0.082	-0.007	-0.025	-0.027	-0.099	-0.018	0.991076	0.999706
Q64727	Q64727|A0A286YDJ4	Vcl	Vinculin	MOUSE	77	74.5	1036.32	0.116	-0.084	0.069	0.132	-0.001	0.039	0.156	0.125	0.261345	0.999706
Q61543	Q61543|F8WHM5|F6RSH1|E9PWD8	Glg1	Golgi apparatus protein 1	MOUSE	69	60.7	1035.87	0.007	0.301	0.094	-0.099	0.056	-0.052	-0.231	-0.245	0.248922	0.999706
Q9CW03	Q9CW03	Smc3	Structural maintenance of chromosomes protein 3	MOUSE	80	60.1	1034.05	-0.011	0.012	0.056	0.048	-0.074	-0.06	-0.036	0.043	0.662846	0.999706
Q9WTQ5	Q9WTQ5|A0A668KLD3|A0A668KLV9|A0A668KM55	Akap12	A-kinase anchor protein 12	MOUSE	66	54.6	1030.65	0.19	-0.021	0.09	-0.148	-0.095	-0.05	0	-0.154	0.246922	0.999706
J3KMG3	J3KMG3|J3KMH5	Mia3	Transport and Golgi organization protein 1 homolog (Fragment)	MOUSE	44	47.4	523.63	-0.143	0.044	-0.367	-0.338	-0.025	0.014	-0.026	-0.427	0.0351619	0.999706
P27546	P27546|A0A140T8T5|A0A0G2JG35|A0A0G2JFT4|A0A0G2JDY5|A0A0G2JFK3|A0A0G2JE57|A0A0G2JDU1	Map4	Microtubule-associated protein 4	MOUSE	73	67.9	1028.58	0.098	-0.18	-0.013	-0.162	-0.001	0.044	0.057	-0.065	0.392448	0.999706
E9PZ43	E9PZ43|A0A0G2JDN7	Map4	Microtubule-associated protein	MOUSE	62	70.4	884.72	0.025	-0.256	-0.098	-0.297	0.012	0.113	0.137	-0.077	0.360098	0.999706
A0A0G2JFH2	A0A0G2JFH2	Map4	Microtubule-associated protein (Fragment)	MOUSE	41	22.5	507.15	0.733	-0.891	-1.029	-0.826	-0.061	1.086	1.361	0.459	0.966154	0.999706
Q78TF3	Q78TF3	Map4	Microtubule-associated protein 4	MOUSE	7	91.9	129.37	0.201	-0.267	-0.164	-0.616	-0.016	0.242	-0.084	-0.3	0.0820171	0.999706
Q61301	Q61301|E0CXB9|Q8BS72|A0A0N4SUZ7	Ctnna2	Catenin alpha-2	MOUSE	67	73.9	1022.46	0.04	-0.023	0.092	-0.036	0.013	-0.039	-0.058	-0.012	0.881861	0.999706
P26231	P26231|A0A494BAD0|A0A494BAM5|A0A494BBB4|Q65CL1|A0A494BA24	Ctnna1	Catenin alpha-1	MOUSE	54	68.7	802.67	0.08	0.041	0.09	0.14	-0.155	-0.119	-0.075	-0.006	0.665975	0.999706
Q922S4	Q922S4|Q5PR72|A0A1B0GRJ9|F7D3W5|A0A1B0GT58	Pde2a	cGMP-dependent 3',5'-cyclic phosphodiesterase	MOUSE	62	82.3	1016.53	-0.009	-0.032	0.027	0.024	0.034	0.014	-0.045	0.088	0.817379	0.999706
Q5H8C4	Q5H8C4|A0A286YCT3|A0A286YCC3|A0A494B9C3	Vps13a	Vacuolar protein sorting-associated protein 13A	MOUSE	80	28.6	1013.78	0.028	-0.119	-0.067	-0.031	0.032	0.055	0.073	0.089	0.902759	0.999706
A0A0A6YY91	A0A0A6YY91	Ncam1	Neural cell adhesion molecule 1 (Fragment)	MOUSE	62	67.5	1012.09	0.024	-0.023	0.042	-0.007	0.08	0.07	0.027	0.083	0.89957	0.999706
E9QB01	E9QB01	Ncam1	Neural cell adhesion molecule 1	MOUSE	51	65	828.39	0.086	0.004	0.091	-0.067	0.042	-0.002	-0.024	0.061	0.848752	0.999706
E9PV14	E9PV14|A2AUK5|A2AUK8|Q9Z2H5|A2AUK7	Epb41l1	Band 4.1-like protein 1	MOUSE	71	41.9	1010.55	0.044	-0.13	-0.03	-0.14	0.024	0.029	0.048	0.021	0.678352	0.999706
D0VYV6	D0VYV6	Epb41l3	Band 4.1-like protein 3	MOUSE	64	67.2	969.1	0.062	-0.068	0.028	-0.17	0.021	0.062	0.012	-0.054	0.327731	0.999706
A7YY80	A7YY80	Epb41l3	130kDa Protein 4.1B MEF cell isoform	MOUSE	62	67	933.71	-0.001	-0.436	-0.292	-0.373	0.095	0.151	-0.085	-0.019	0.369036	0.999706
A0A3B2WBE1	A0A3B2WBE1	Epb41l3	Band 4.1-like protein 3 (Fragment)	MOUSE	61	69.4	900.33	0.083	0.056	0.166	0.202	-0.307	-0.073	-0.084	-0.002	0.424049	0.999706
O70318	O70318|Q80UE5|Q80UE4|Q8C928|A0A1W2P6I5|A0A1W2P7I4|A0A1W2P7H7|A0A1W2P7I2|A0A1W2P896|A0A1W2P6H2	Epb41l2	Band 4.1-like protein 2	MOUSE	57	53.8	800.99	-0.051	-0.042	-0.042	0.063	-0.026	-0.063	0.072	0.035	0.548925	0.999706
A2A841	A2A841|P48193|A2A842|A2AD32|A2A838|A2A839|A0A571BEG4|A0A1D5RLV1|F7BUB8|F6S4K9|F7CR30	Epb41	Band 4.1	MOUSE	43	58.5	594.22	0.115	0.093	0.066	0.025	-0.135	-0.142	-0.082	-0.08	0.995128	0.999706
A0A2R8VHB6	A0A2R8VHB6	Epb41l1	Band 4.1-like protein 1 (Fragment)	MOUSE	16	58.6	183.21	0.086	0.084	0.355	0.548	-0.523	0.098	0.052	0.195	0.0648225	0.999706
H3BJZ7	H3BJZ7|Q4KUS2|H3BKY4|H3BJL3|Q8K0T7	Unc13a	Protein unc-13 homolog A	MOUSE	74	45.3	1009.37	0.003	-0.117	0.022	0	0.048	0.079	0.084	0.069	0.835672	0.999706
A0A140LJ69	A0A140LJ69|A0A140LHX5|E9Q263|Q9Z1N9|F7CEK4	Unc13b	Protein unc-13 homolog B	MOUSE	22	4.4	237.87	0.009	-0.039	-0.235	-0.143	-0.021	0.13	0.179	0.02	0.91049	0.999706
A0A0A6YWG7	A0A0A6YWG7|E9QNQ4|Q8CHG7	Rapgef2	Cyclic nucleotide ras GEF	MOUSE	72	55.7	1005.96	0.058	-0.054	0.019	0.037	0.013	0.026	0.072	0.064	0.752908	0.999706
Q5NCJ1	Q5NCJ1|B2RUJ6|Q5NCJ0|A0A5F8MPT3|Q5NCJ5|Q5NCJ4|A0A1W2P734|Q5NCJ2	Rapgef6	Rap guanine nucleotide exchange factor (GEF) 6	MOUSE	25	15.9	252.24	0.204	0.119	0.128	0.315	-0.155	-0.101	-0.081	0.113	0.244589	0.999706
B2RQ71	B2RQ71|E9PWR4|A0A1Y7VMZ0|F7BCF6	Dip2c	Dip2c protein	MOUSE	71	54.8	1005.63	0.062	-0.066	0.031	0.016	-0.013	-0.003	-0.037	0.018	0.89528	0.999706
B7ZMZ7	B7ZMZ7	Dip2c	Dip2c protein	MOUSE	67	53.9	948.51	0.005	-0.14	-0.175	-0.015	0.166	0.1	0.353	0.24	0.755804	0.999706
Q3UH60	Q3UH60	Dip2b	Disco-interacting protein 2 homolog B	MOUSE	62	50.1	892.31	0.117	-0.033	0.074	-0.033	-0.031	0.061	0.055	-0.002	0.790944	0.999706
B2RQC7	B2RQC7	Dip2b	DIP2 disco-interacting protein 2 homolog B (Drosophila)	MOUSE	56	52.5	785.25	-0.16	-0.021	0.102	0.105	0.095	-0.018	0.055	0.092	0.492479	0.999706
D3Z7D3	D3Z7D3|F8WI56|Q8BWT5|F7DDW0	Dip2a	Disco-interacting protein 2 homolog A	MOUSE	40	33.5	541.24	0.063	0.023	-0.044	0.032	0.046	0.09	0.165	0.145	0.754952	0.999706
E9Q512	E9Q512|H3BJG4|Q8BVJ9|H3BJH8|H3BJU5	Trip11	Thyroid hormone receptor interactor 11	MOUSE	76	41.8	999.97	0.046	-0.181	-0.056	-0.23	-0.026	0.058	0.069	-0.086	0.345552	0.999706
Q8BMJ2	Q8BMJ2|A0A494BBF9|A0A494BA98|A0A494BA30|A0A494B919	Lars1	Leucine--tRNA ligase, cytoplasmic	MOUSE	68	62.4	995.29	-0.048	0.134	-0.029	0.015	-0.013	-0.005	-0.123	-0.093	0.4124	0.999706
E9Q3L1	E9Q3L1|V9GXM4|E9Q175|V9GX76|E9Q174|E9PVU0|Q64331	Myo6	Unconventional myosin-6	MOUSE	70	54	994.99	0.024	0.05	0.063	0.124	-0.061	-0.014	0.024	0.078	0.355923	0.999706
A0A0A0MQE5	A0A0A0MQE5|A2AHC3|A2AHC4|F6Q2D3|F6QF29|F6W3X2|V9GXD7|V9GXT0	Camsap1	Calmodulin-regulated spectrin-associated protein 1	MOUSE	74	53.1	994.93	0.038	-0.146	-0.042	-0.174	0.028	0.093	0.07	0.008	0.691802	0.999706
P11499	P11499|E9Q3D6|E9Q0C3|E9PX27|D3Z1R1	Hsp90ab1	Heat shock protein HSP 90-beta	MOUSE	61	73.2	994.31	-0.017	-0.054	0.013	0.004	0.021	-0.018	-0.06	0.009	0.93282	0.999706
P08113	P08113|F7C312	Hsp90b1	Endoplasmin	MOUSE	61	68.7	910.86	-0.037	-0.161	-0.054	-0.071	0.071	0.009	-0.073	0.076	0.629974	0.999706
P07901	P07901|B7ZC50|B7ZC49	Hsp90aa1	Heat shock protein HSP 90-alpha	MOUSE	55	69.7	908.1	-0.023	-0.118	-0.033	0.016	0.066	0.01	-0.053	0.114	0.446848	0.999706
Q9CQN1	Q9CQN1	Trap1	Heat shock protein 75 kDa, mitochondrial	MOUSE	51	68.4	725.87	-0.1	0.302	0.072	0.181	-0.006	-0.17	-0.242	-0.082	0.803341	0.999706
A2A6A2	A2A6A2	Hsp90aa1	Heat shock protein HSP 90-alpha (Fragment)	MOUSE	5	44.8	64.44	0.275	0.123	-0.096	-0.007	-0.291	0.074	0.66	0.315	0.793098	0.999706
E9QPD7	E9QPD7|G5E8R3|Q05920|A0A494B912|A0A286YCC5|A0A494B951	Pcx	Pyruvate carboxylase	MOUSE	68	70.4	986.73	-0.141	0.338	-0.007	0.205	-0.088	-0.197	-0.328	-0.123	0.513073	0.999706
E9Q6L9	E9Q6L9|A0A0G2JFZ5|A0A0G2JDT9|Q80TE7|B9EHV0	Lrrc7	Leucine-rich repeat-containing protein 7	MOUSE	70	57.1	986.15	0.012	-0.095	-0.074	-0.171	0.055	0.076	0.021	-0.027	0.464487	0.999706
A0A571BEA5	A0A571BEA5	Lrrc7	Leucine-rich repeat-containing protein 7	MOUSE	70	59.2	983.29	0.751	0.352	0.157	-0.059	-0.099	0.024	0.476	0.269	0.669842	0.999706
B7ZNX6	B7ZNX6|Q80TH2|B2RUJ2	Erbin	Erbb2ip protein	MOUSE	36	30.4	453.03	-0.032	0.047	-0.002	-0.022	-0.029	-0.09	-0.039	-0.065	0.953135	0.999706
Q9JME5	Q9JME5|A0A571BES1|A0A571BEW4|A0A571BEC1	Ap3b2	AP-3 complex subunit beta-2	MOUSE	70	65.8	983.45	0.032	-0.103	-0.031	-0.004	0.041	0.053	0.053	0.105	0.802998	0.999706
Q9Z1T1	Q9Z1T1|A0A338P6V5	Ap3b1	AP-3 complex subunit beta-1	MOUSE	45	40.9	522.91	0.085	-0.012	0.046	0.023	-0.066	-0.036	0.025	-0.039	0.91165	0.999706
P46460	P46460|G3UX86|G3UX98	Nsf	Vesicle-fusing ATPase	MOUSE	66	85.4	983.13	-0.089	-0.171	0.001	-0.008	0.079	0.036	-0.002	0.134	0.634474	0.999706
O88935	O88935	Syn1	Synapsin-1	MOUSE	55	93.3	977.48	0.01	-0.156	-0.016	-0.002	0.052	0.038	0.063	0.138	0.534016	0.999706
Q64332	Q64332	Syn2	Synapsin-2	MOUSE	33	78.6	611.04	-0.079	-0.124	0.06	0.03	0.11	-0.007	-0.049	0.159	0.530261	0.999706
Q60597	Q60597|Q5SVY0	Ogdh	2-oxoglutarate dehydrogenase, mitochondrial	MOUSE	67	61.2	976.8	-0.139	0.325	0.136	0.22	-0.02	-0.182	-0.366	-0.128	0.794365	0.999706
Z4YJV4	Z4YJV4	Ogdh	2-oxoglutarate dehydrogenase, mitochondrial	MOUSE	66	60.5	962.72	0.171	0.727	0.549	0.532	-0.01	-0.266	-0.285	0.066	0.732343	0.999706
B2RXT3	B2RXT3|E9Q7L0	Ogdhl	Ogdhl protein	MOUSE	60	62.9	837.06	-0.166	0.402	0.192	0.294	-0.009	-0.254	-0.34	-0.165	0.898658	0.999706
Q8BKC5	Q8BKC5	Ipo5	Importin-5	MOUSE	56	74.2	974.26	-0.011	-0.116	-0.089	-0.13	-0.031	0.02	-0.015	-0.087	0.513604	0.999706
Q8BIV3	Q8BIV3	Ranbp6	Ran-binding protein 6	MOUSE	41	38.4	537.06	0.031	-0.12	-0.118	-0.163	-0.028	0.046	0.015	-0.04	0.645436	0.999706
F8WGF2	F8WGF2|Q9Z0J4|S4R255|S4R1D5	Nos1	Constitutive NOS	MOUSE	71	55	973.18	-0.068	-0.125	-0.112	-0.007	0.083	0.09	0.034	0.2	0.522306	0.999706
A2A690	A2A690	Tanc2	Protein TANC2	MOUSE	72	36.9	971.28	-0.063	-0.239	-0.13	-0.216	0.043	0.087	0.039	-0.023	0.645111	0.999706
F6VP19	F6VP19	Tanc2	Protein TANC2 (Fragment)	MOUSE	37	35.8	504.33	0.523	-0.027	-0.768	-0.356	-0.547	0.137	0.262	-0.428	0.770864	0.999706
F6VCI2	F6VCI2	Tanc2	Protein TANC2 (Fragment)	MOUSE	15	46.4	210.18	0.148	-0.233	0.073	0.135	0.266	-0.058	0.039	0.02	0.0430188	0.999706
E9Q2K2	E9Q2K2	Tanc2	Protein TANC2 (Fragment)	MOUSE	5	57.2	62.32	0.255	-0.33	0.119	-0.036	0.222	0.322	0.455	0.064	0.308644	0.999706
A0A0R4J0M9	A0A0R4J0M9|Q8CDG3	Vcpip1	Ubiquitinyl hydrolase 1	MOUSE	66	65.4	964.55	-0.016	-0.091	-0.031	-0.025	0.039	0.032	0.046	0.036	0.960111	0.999706
Q6PGJ3	Q6PGJ3|A2AFG8|A2AFG7|P11627|F7A5H7|F6UIL7|B7ZCD3	L1cam	L1 cell adhesion molecule	MOUSE	62	55.6	964.09	0.048	-0.035	0.042	-0.029	0.018	0.028	-0.042	0.048	0.977022	0.999706
Q9EQQ9	Q9EQQ9|A0A494B913|A0A494BAA3	Oga	Protein O-GlcNAcase	MOUSE	60	77.9	962.73	0.04	-0.077	0.027	0.054	0.031	-0.011	-0.046	0.085	0.474115	0.999706
G5E866	G5E866|Q99NB9|A0A087WNS2	Sf3b1	Splicing factor 3B subunit 1	MOUSE	64	59.4	962.06	-0.038	-0.19	-0.058	-0.167	-0.002	0.073	0.056	-0.086	0.500764	0.999706
Q80VC9	Q80VC9|A0A140LJI9	Camsap3	Calmodulin-regulated spectrin-associated protein 3	MOUSE	67	68.6	961.7	0	-0.134	0.011	-0.116	-0.002	-0.008	-0.018	0.006	0.723606	0.999706
Q8BHN3	Q8BHN3	Ganab	Neutral alpha-glucosidase AB	MOUSE	61	65	959.73	-0.085	-0.09	0	-0.042	-0.015	-0.037	-0.077	-0.029	0.82611	0.999706
Q78PY7	Q78PY7|Q3TJ56|E9Q3E9	Snd1	Staphylococcal nuclease domain-containing protein 1	MOUSE	62	73	959.48	-0.11	-0.127	-0.131	-0.159	0.079	0.011	-0.109	-0.117	0.272788	0.999706
O54774	O54774|A0A1W2P6Q6|A0A1W2P7Z2	Ap3d1	AP-3 complex subunit delta-1	MOUSE	58	53	953.18	0.053	-0.121	-0.113	-0.062	0.015	0.07	0.065	0.053	0.943361	0.999706
Q9ESK9	Q9ESK9|F7CC56|E9PX56|F7CCJ3|E0CYY6|F6TLJ4|E0CZG6	Rb1cc1	RB1-inducible coiled-coil protein 1	MOUSE	70	46.4	951.95	0.064	-0.113	-0.056	-0.086	0.02	0.02	0.025	-0.008	0.676711	0.999706
Q91Z67	Q91Z67|A0A087WNM1|A0A087WSQ1|A0A087WS59|A0A087WRV4|A0A087WS73|A0A087WNR5	Srgap2	SLIT-ROBO Rho GTPase-activating protein 2	MOUSE	62	63.9	949.98	0.018	-0.162	-0.061	-0.15	0.064	0.1	0.015	0.009	0.7316	0.999706
Q99NE5	Q99NE5|F6VBR4|F6VBT9|F6VBV0|F6Y0S3|A0A087WSA4|A0A1W2P6S9|Q7TPL9|A0A668KL79	Rims1	Regulating synaptic membrane exocytosis protein 1	MOUSE	71	53.1	949.06	-0.009	-0.108	-0.008	-0.08	0.086	0.037	0.067	-0.005	0.641089	0.999706
F6TZK4	F6TZK4	Rims1	Regulating synaptic membrane exocytosis protein 1	MOUSE	64	54.7	855	0.222	0.414	0.163	0.137	-0.06	0.004	0.299	-0.062	0.35441	0.999706
E9PWP6	E9PWP6	Rims1	Regulating synaptic membrane exocytosis protein 1 (Fragment)	MOUSE	44	60.1	603.33	0.059	-0.218	-0.192	-0.289	0.017	0.187	0.266	-0.027	0.656667	0.999706
Q80U57	Q80U57	Rims3	Regulating synaptic membrane exocytosis protein 3	MOUSE	6	26	84.44	-0.18	-0.119	-0.003	0.049	0.033	-0.058	-0.045	0.096	0.33354	0.999706
E9QN14	E9QN14|Q812A2|F6QZR7	Srgap3	SLIT-ROBO Rho GTPase-activating protein 3	MOUSE	61	61.4	948.29	-0.024	-0.078	-0.051	0.011	0.029	0.052	0.015	0.072	0.878142	0.999706
F8VPQ4	F8VPQ4	Srgap3	SLIT-ROBO Rho GTPase-activating protein 3	MOUSE	61	59.9	944.99	0.173	0.126	0.299	0.236	-0.024	-0.11	0.224	0.17	0.0399057	0.999706
Q91Z69	Q91Z69|D3YZW1|F7D9F7	Srgap1	SLIT-ROBO Rho GTPase-activating protein 1	MOUSE	50	49.3	700.99	0.013	-0.145	-0.096	-0.076	0.008	0.026	-0.019	-0.076	0.624922	0.999706
Q8BTI8	Q8BTI8|A0A3B2W3Z4|A0A087WRX8|A0A087WPS9	Srrm2	Serine/arginine repetitive matrix protein 2	MOUSE	82	33.2	948.19	0.053	-0.066	0.016	-0.075	-0.015	0.083	0.11	-0.047	0.585338	0.999706
E9QP99	E9QP99|P55937|A0A0R4J1H6|D3Z0Q8	Golga3	Golgin subfamily A member 3	MOUSE	69	54.2	943.69	0.047	-0.1	-0.044	-0.151	-0.025	0.026	0.069	-0.049	0.533262	0.999706
Q9Z1Q9	Q9Z1Q9|G3UY93|G3UZ22|G3UYW2|G3UZX1	Vars1	Valine--tRNA ligase	MOUSE	64	59.7	940.56	-0.064	0.056	-0.064	-0.035	0.025	0	-0.085	-0.053	0.552741	0.999706
F8WIE5	F8WIE5|Q69ZR2	Hectd1	HECT-type E3 ubiquitin transferase	MOUSE	77	34	940.43	0.094	0.109	0.002	0.028	-0.04	-0.004	0.018	0.005	0.929144	0.999706
F8VPX1	F8VPX1|E9PXY8|Q6A4J8|G3UWR8|E0CY04	Usp7	Ubiquitin carboxyl-terminal hydrolase 7	MOUSE	68	65.7	936.93	-0.039	0.05	0.034	0.05	0.022	-0.018	-0.025	-0.009	0.988213	0.999706
Q8CH09	Q8CH09|D3Z0I4|F6X398|D3YVJ0	Sugp2	SURP and G-patch domain-containing protein 2	MOUSE	67	66.9	935.88	-0.046	0.079	-0.028	-0.156	-0.035	0.059	-0.056	-0.235	0.0268705	0.999706
Q99KI0	Q99KI0|A0A2R8W744|A0A2R8VHM8	Aco2	Aconitate hydratase, mitochondrial	MOUSE	55	74.8	935.75	-0.095	0.242	-0.002	0.146	-0.039	-0.125	-0.277	-0.09	0.517014	0.999706
A0A2R8VJW0	A0A2R8VJW0	Aco2	Aconitate hydratase, mitochondrial (Fragment)	MOUSE	7	80.6	77.04	0.069	-0.069	0.011	-0.029	-0.404	0.174	0.334	0.238	0.504045	0.999706
Q11011	Q11011|E9Q039|F6QYF8|E9Q6F4|F6V7K3|F7ANF4|F2Z3V5	Npepps	Puromycin-sensitive aminopeptidase	MOUSE	62	67.2	935.34	0.029	-0.12	0.012	0.056	0.015	0.012	0.019	0.116	0.389357	0.999706
P08775	P08775|A0A0R4J0V5	Polr2a	DNA-directed RNA polymerase II subunit RPB1	MOUSE	72	38.1	932.42	-0.068	0.056	0.084	0.004	-0.012	-0.047	-0.013	-0.051	0.822152	0.999706
Q8K1M6	Q8K1M6|A0A2U3TZ67	Dnm1l	Dynamin-1-like protein	MOUSE	58	85.5	932.28	-0.041	-0.1	0.01	0.043	0.057	-0.04	-0.026	0.069	0.452471	0.999706
E9PUD2	E9PUD2	Dnm1l	Dynamin-1-like protein	MOUSE	56	86.6	902.1	0.148	-0.102	0	0.018	0.085	0.109	0.264	0.003	0.493717	0.999706
Q9JKR6	Q9JKR6|F6TRP3|E0CYZ2|A0A1L1SQ34	Hyou1	Hypoxia up-regulated protein 1	MOUSE	65	64.7	929.6	-0.047	-0.18	-0.051	-0.16	0.055	0.052	-0.062	-0.006	0.718372	0.999706
E9QK04	E9QK04|Q7TQG5|P97798	Neo1	Neogenin	MOUSE	57	51.8	927.95	0.056	-0.017	0.038	-0.078	-0.035	0.019	-0.006	-0.047	0.727604	0.999706
A0A1L1SRD6	A0A1L1SRD6	Neo1	Neogenin (Fragment)	MOUSE	16	61.2	270.5	0.079	0.122	0.121	-0.291	0.06	-0.142	0.053	-0.316	0.0139463	0.999706
E9Q8I9	E9Q8I9|A0A5F8MPN1|A0A0J9YTT8	Fry	Protein furry homolog	MOUSE	73	29.3	927.41	0	-0.042	-0.105	-0.049	-0.018	0.04	0.057	-0.007	0.986049	0.999706
F8VQ05	F8VQ05|A0A0J9YTS1|A0A0J9YUH4|F6Q1V8|A0A0J9YU33|A0A0J9YUJ6|H3BLH9	Fryl	FRY-like transcription coactivator	MOUSE	49	16.6	539.01	0.069	0.067	-0.109	-0.033	-0.025	0.037	0.048	-0.037	0.755979	0.999706
A0A0J9YVH0	A0A0J9YVH0	Fry	Protein furry homolog (Fragment)	MOUSE	18	21.9	255.65	-0.09	-0.047	-0.076	-0.071	-0.147	-0.067	0.058	-0.095	0.390893	0.999706
Q9EPU0	Q9EPU0	Upf1	Regulator of nonsense transcripts 1	MOUSE	64	62.8	925.32	-0.039	-0.086	-0.11	-0.108	0.024	-0.103	-0.175	-0.055	0.181052	0.999706
Q6GQT9	Q6GQT9	Nomo1	Nodal modulator 1	MOUSE	59	61.7	923.62	-0.157	0.15	-0.073	-0.188	-0.014	-0.012	-0.173	-0.253	0.0703169	0.999706
P50516	P50516|D3Z1B9|D3YWH3|D3YZ23	Atp6v1a	V-type proton ATPase catalytic subunit A	MOUSE	53	90.4	922.93	-0.136	-0.096	0.102	0.078	0.099	-0.092	-0.171	0.13	0.566467	0.999706
A0A1Y7VMH7	A0A1Y7VMH7	Kidins220	Kinase D-interacting substrate 220	MOUSE	66	46.6	919.5	0.047	0.139	0.068	0.15	-0.036	-0.001	-0.056	0.059	0.417564	0.999706
E9Q9B7	E9Q9B7|A0A1Y7VME9	Kidins220	Kinase D-interacting substrate 220	MOUSE	66	43.3	914.45	-0.007	0.162	0.071	0.159	0.141	0.26	0.272	0.208	0.0658841	0.999706
A0A1Y7VNF8	A0A1Y7VNF8	Kidins220	Kinase D-interacting substrate 220 (Fragment)	MOUSE	52	47.9	706.3	0.118	0.211	0.041	-0.043	-0.046	-0.185	-0.095	-0.156	0.720563	0.999706
D3YWX2	D3YWX2|F6YTL8|E9Q803|Q9R0I7	Ylpm1	YLP motif-containing protein 1	MOUSE	76	38.2	918.61	0.057	-0.236	-0.04	-0.24	0.023	0.039	0.106	-0.094	0.198824	0.999706
A2AWA9	A2AWA9|A2AWA7|A2AWB0	Rabgap1	Rab GTPase-activating protein 1	MOUSE	69	61.2	915.35	0.007	-0.11	-0.027	-0.029	0.077	0.053	0.064	0.039	0.860566	0.999706
A6H6A9	A6H6A9|A0A0A6YW18|A0A0A6YWY0	Rabgap1l	Rab GTPase-activating protein 1-like	MOUSE	29	35.8	372.29	-0.121	-0.12	-0.19	-0.167	0.07	0.118	0.04	0.058	0.847225	0.999706
A0A0A6YWT4	A0A0A6YWT4	Rabgap1l	Rab GTPase-activating protein 1-like (Fragment)	MOUSE	17	56	211.33	0.026	-0.294	-0.17	-0.117	0.019	0.029	0.025	0.06	0.551608	0.999706
Q61687	Q61687|F6RDB7|A0A0G2JFA5|Q8C2S3|Q3UY26|A6PWK7|A6PWK8|A0A0G2JF42|A0A0G2JFG6|A0A0G2JED2|Q3TA30|A6PWK9|A0A0G2JGH3|A0A0G2JFR8	Atrx	Transcriptional regulator ATRX	MOUSE	67	29.7	911.69	0.119	0.086	0.109	0.023	-0.004	0.006	-0.008	-0.2	0.338859	0.999706
Q3U4W8	Q3U4W8|P56399|D3YYA5|D3Z4K7	Usp5	Ubiquitin carboxyl-terminal hydrolase	MOUSE	55	68	908.73	-0.039	-0.089	0.002	0.055	0.006	-0.015	-0.09	0.095	0.396802	0.999706
D3YZU1	D3YZU1|D3YZU5|D3YZU4	Shank1	SH3 and multiple ankyrin repeat domains protein 1	MOUSE	66	39.7	906.83	-0.032	-0.102	-0.018	-0.081	0.005	-0.005	-0.019	0.033	0.915506	0.999706
Q9ES97	Q9ES97	Rtn3	Reticulon-3	MOUSE	58	77.9	903.15	0.067	-0.131	-0.054	-0.22	0.014	0.063	0.076	-0.042	0.374292	0.999706
E9QML5	E9QML5|Q61464|A0A0N4SV80|E9QKZ7|A0A0N4SVI8|A0A0N4SV38|Q3TZK9|A0A0N4SVM8|A0A0N4SUP3	Zfp638	Zinc finger protein 638	MOUSE	65	41.5	900.49	0.037	-0.057	-0.089	-0.19	-0.036	0.003	0.011	-0.153	0.146376	0.999706
D3YXK2	D3YXK2|S4R1M2|S4R2Q5|S4R1W0	Safb	Scaffold attachment factor B1	MOUSE	70	54.8	899.8	0.012	-0.246	-0.087	-0.26	0.055	0.071	0.072	-0.126	0.193133	0.999706
Q80YR5	Q80YR5|F6WIZ2|D6RHP9|F6Z0Y5|F6XJ79|D6RJ78|F6VRR0	Safb2	Scaffold attachment factor B2	MOUSE	41	40	472.36	0.08	-0.113	-0.008	-0.172	0.009	0.04	0.046	-0.103	0.212077	0.999706
Q6P9K8	Q6P9K8|F6R2B3	Caskin1	Caskin-1	MOUSE	63	56.1	899.22	0.008	-0.193	-0.122	-0.198	0.051	0.052	0.038	-0.018	0.496935	0.999706
Q8VHK1	Q8VHK1	Caskin2	Caskin-2	MOUSE	6	6.1	68.08	-0.14	-0.204	-0.288	-0.129	0.026	-0.053	-0.085	0.208	0.189266	0.999706
Q7TPV4	Q7TPV4	Mybbp1a	Myb-binding protein 1A	MOUSE	62	53.7	895.57	0.011	0.411	-0.058	-0.038	-0.08	-0.046	-0.098	-0.191	0.219262	0.999706
Q811P8	Q811P8|S4R2C0	Arhgap32	Rho GTPase-activating protein 32	MOUSE	65	40.8	895.43	-0.03	-0.156	-0.129	-0.344	0.103	0.104	0.042	-0.169	0.0539586	0.999706
Q80YF9	Q80YF9|A0A140LHW2|A0A140LIY1	Arhgap33	Rho GTPase-activating protein 33	MOUSE	30	31.1	411.19	0.11	-0.051	-0.041	-0.124	0.053	0.029	0.018	-0.066	0.213195	0.999706
S4R2G6	S4R2G6	Arhgap32	Rho GTPase-activating protein 32 (Fragment)	MOUSE	6	38.8	66.19	-0.094	0.159	-0.227	-0.425	0.061	0.085	0.323	-0.087	0.263211	0.999706
Q640N3	Q640N3|E9QMX7	Arhgap30	Rho GTPase-activating protein 30	MOUSE	6	4.5	58.53	0.012	-0.229	-0.14	-0.106	0.144	0.012	0.145	-0.011	0.372917	0.999706
A6X8Z5	A6X8Z5	Arhgap31	Rho GTPase-activating protein 31	MOUSE	4	2.4	45.12	0.026	0.141	0.224	0.015	-0.654	-0.378	-0.678	-0.763	0.449508	0.999706
O70589	O70589|F6Y9I5|F6ZQR2|F7CD87|B1AUH6	Cask	Peripheral plasma membrane protein CASK	MOUSE	59	69.8	894.43	0.037	-0.065	0.06	-0.037	-0.001	-0.038	-0.048	0.001	0.829322	0.999706
A0A067XG53	A0A067XG53	Cask	Peripheral plasma membrane protein CASK (Fragment)	MOUSE	55	65.6	821.77	0.063	0.189	0.298	0.26	0.162	0.2	0.238	0.312	0.00929699	0.999706
B1AUH5	B1AUH5	Cask	Peripheral plasma membrane protein CASK (Fragment)	MOUSE	13	69	176.22	0.052	-0.057	0	-0.006	0.161	0.072	0.166	0.111	0.444793	0.999706
Q9JKY5	Q9JKY5|A0A0G2JFU3|F7DCR9|E9Q3C5	Hip1r	Huntingtin-interacting protein 1-related protein	MOUSE	69	61.6	858.62	-0.045	-0.163	-0.186	-0.283	0.09	0.188	0.083	-0.059	0.357977	0.999706
Q8VD75	Q8VD75|A0A0J9YUA3|A0A1D5RMM7|A0A0J9YUX9|A0A0J9YV08	Hip1	Huntingtin-interacting protein 1	MOUSE	63	67.5	893.92	0.025	-0.09	-0.109	-0.199	0.015	0.034	0.017	-0.109	0.18829	0.999706
F8VPU2	F8VPU2|E9Q805	Farp1	FERM, ARHGEF and pleckstrin domain-containing protein 1	MOUSE	62	62.9	893.6	0.064	-0.014	0.01	-0.051	0.034	0.039	0.05	0.024	0.834522	0.999706
B9EHJ3	B9EHJ3|P39447|A0A0U1RPW2|A0A0U1RPB2	Tjp1	Tight junction protein ZO-1	MOUSE	68	46.2	892.81	-0.029	-0.133	-0.059	-0.027	-0.045	0.006	-0.022	-0.025	0.858326	0.999706
B9EJ54	B9EJ54|A0A0J9YUD5|E9Q880	Nup205	Nucleoporin 205	MOUSE	63	36.8	892.78	-0.006	0.142	-0.07	-0.071	-0.098	-0.015	-0.002	-0.045	0.513628	0.999706
P14733	P14733	Lmnb1	Lamin-B1	MOUSE	58	77.2	891.33	0.043	-0.078	0.043	0.02	-0.032	-0.04	0.049	0.082	0.461351	0.999706
A0A0R4J0Q5	A0A0R4J0Q5|P21619	Lmnb2	Lamin-B2	MOUSE	41	64.2	562.56	0.009	-0.259	-0.034	-0.16	0.082	0.062	0.07	0.059	0.582564	0.999706
P16054	P16054|Q8C944|P23298	Prkce	Protein kinase C epsilon type	MOUSE	60	73.5	890.97	0.066	-0.054	0.033	0.109	-0.014	-0.056	-0.002	0.087	0.237802	0.999706
A0A1D5RM83	A0A1D5RM83|Q8R0S2|A0A5F8MPT9|A0A0R4J1U6	Iqsec1	IQ motif and SEC7 domain-containing protein 1	MOUSE	67	62.7	889.34	0.087	-0.151	-0.045	-0.031	-0.015	0.027	0.05	0.078	0.789024	0.999706
E9PUA3	E9PUA3	Iqsec1	IQ motif and SEC7 domain-containing protein 1	MOUSE	62	57.2	833.05	0.229	-0.176	-0.161	-0.142	0.111	0.295	0.103	0.154	0.678528	0.999706
E9QAD8	E9QAD8|A4GZ26|Q5DU25|D3Z5I6|D3Z6V7	Iqsec2	IQ motif and SEC7 domain-containing protein 2	MOUSE	62	43.1	785.14	0.063	-0.085	-0.016	-0.023	-0.001	0.069	0.06	0.002	0.963199	0.999706
Q9JJ28	Q9JJ28	Flii	Protein flightless-1 homolog	MOUSE	60	52.9	887.54	-0.049	-0.041	-0.004	-0.023	0.023	-0.008	-0.057	0.008	0.979371	0.999706
Q9QYB8	Q9QYB8|A0A0N4SWF0	Add2	Beta-adducin	MOUSE	57	80	884.09	-0.06	-0.208	-0.076	-0.136	0.058	0.01	-0.025	-0.044	0.502219	0.999706
Q8C7R4	Q8C7R4|D3Z061	Uba6	Ubiquitin-like modifier-activating enzyme 6	MOUSE	55	71.6	883.28	-0.065	0.094	0.027	0.137	-0.008	-0.082	-0.082	0.038	0.551038	0.999706
Q80XK6	Q80XK6|A0A1Y7VNP1	Atg2b	Autophagy-related protein 2 homolog B	MOUSE	69	37.1	881.29	-0.013	-0.127	-0.044	-0.016	0.085	0.078	0.076	0.064	0.917793	0.999706
Q8VHY0	Q8VHY0	Cspg4	Chondroitin sulfate proteoglycan 4	MOUSE	62	34.7	879.2	-0.071	0.017	-0.027	-0.082	-0.015	-0.028	0.017	0.052	0.959586	0.999706
O55143	O55143|Q8R429	Atp2a2	Sarcoplasmic/endoplasmic reticulum calcium ATPase 2	MOUSE	58	56.2	879.18	0.056	0.141	0.045	0.074	0.005	-0.006	-0.012	0.029	0.785738	0.999706
E9Q559	E9Q559|B1ATS5|Q64518|B1ATS4	Atp2a3	Calcium-transporting ATPase	MOUSE	11	12	132.16	-0.034	0.233	0.04	0.24	0.196	0.26	-0.109	0.158	0.077616	0.999706
O08532	O08532|E9Q1X8|Q8C6Y3	Cacna2d1	Voltage-dependent calcium channel subunit alpha-2/delta-1	MOUSE	53	52.3	878.38	0.048	-0.008	0.022	-0.014	-0.012	-0.02	-0.066	0.023	0.966196	0.999706
Q6PHS9	Q6PHS9|E9Q683	Cacna2d2	Voltage-dependent calcium channel subunit alpha-2/delta-2	MOUSE	34	31.7	495.78	-0.01	-0.016	-0.035	-0.096	-0.018	0.015	-0.051	0.032	0.931804	0.999706
E9QM90	E9QM90|Q148V7|G3X9J4|A0A087WRM8|A0A087WPW3	Relch	RAB11-binding protein RELCH	MOUSE	58	63.1	878.23	-0.045	-0.098	-0.054	-0.099	0.013	0.011	-0.051	0.009	0.862431	0.999706
A0A087WSS1	A0A087WSS1	Relch	RAB11-binding protein RELCH	MOUSE	56	63.5	855.18	-0.22	-0.041	-0.308	-1.064	-0.681	0.062	0.678	0.297	0.533877	0.999706
O08599	O08599|A0A140LHJ4	Stxbp1	Syntaxin-binding protein 1	MOUSE	55	83.5	868.16	-0.022	-0.09	0.062	0.015	0.064	0.014	0	0.108	0.678632	0.999706
Q64521	Q64521|A2AQR0	Gpd2	Glycerol-3-phosphate dehydrogenase, mitochondrial	MOUSE	58	83.3	868.01	-0.117	0.262	0.146	0.182	-0.03	-0.174	-0.366	-0.143	0.854994	0.999706
P52480	P52480|A0A1L1SU37|A0A1L1SQV8|A0A1L1STV8|A0A1L1SSN6|A0A1L1SUV0|A0A1L1ST52|A0A1L1SVH2|P53657|G3X925|E9Q509	Pkm	Pyruvate kinase PKM	MOUSE	52	85.1	867.65	-0.11	-0.075	0.15	0.151	0.098	-0.051	-0.103	0.108	0.521908	0.999706
Q6P5F9	Q6P5F9|F6YA11|A2AKT6	Xpo1	Exportin-1	MOUSE	54	57.8	867.1	-0.069	-0.051	-0.108	-0.052	0.016	0.087	0.029	0.043	0.90387	0.999706
A0A1W2P7Y9	A0A1W2P7Y9|A0A1W2P814|A0A1W2P6P3|A0A1W2P6Z1|A0A1W2P7R6	Nrcam	Neuronal cell adhesion molecule	MOUSE	53	53.1	866.33	-0.022	-0.11	-0.006	-0.179	0.003	-0.026	-0.039	-0.089	0.261194	0.999706
Q810U4	Q810U4|A0A1W2P7X4	Nrcam	Neuronal cell adhesion molecule	MOUSE	52	48.2	856.16	-0.035	-0.078	-0.178	-0.265	-0.045	-0.049	-0.033	-0.075	0.253441	0.999706
P68369	P68369	Tuba1a	Tubulin alpha-1A chain	MOUSE	46	95.7	865.67	-0.071	0.052	0.229	0.167	0.062	-0.084	-0.131	0.09	0.707414	0.999706
P68373	P68373	Tuba1c	Tubulin alpha-1C chain	MOUSE	45	91.5	829.2	0.031	0.44	0.816	0.423	0.283	0.07	0.053	0.354	0.296651	0.999706
P68368	P68368|A0A087WRB4|A0A087WSB0|A0A087WS35	Tuba4a	Tubulin alpha-4A chain	MOUSE	41	89.9	740.39	-0.5	-0.115	0.18	-0.018	-0.01	-0.318	-0.799	0.083	0.688855	0.999706
A0A0A0MQA5	A0A0A0MQA5	Tuba4a	Tubulin alpha chain (Fragment)	MOUSE	40	84.6	722.49	-0.085	0.092	-0.375	-0.138	-0.385	-0.058	0.007	-0.206	0.3583	0.999706
Q9JJZ2	Q9JJZ2	Tuba8	Tubulin alpha-8 chain	MOUSE	27	47.2	430.61	-0.377	-0.407	-0.397	-0.306	0.058	0.102	0.111	-0.017	0.663514	0.999706
A0A087WQS4	A0A087WQS4	Tuba4a	Tubulin alpha-4A chain (Fragment)	MOUSE	8	83.2	129.56	0.425	1.012	1.229	0.591	-0.006	-0.044	0.395	0.765	0.112034	0.999706
Q3UX10	Q3UX10	Tubal3	Tubulin alpha chain-like 3	MOUSE	7	11.4	100.66	0.623	0.143	-0.267	-0.08	0.103	0.175	0.432	0.073	0.557279	0.999706
A0A087WSL5	A0A087WSL5	Tuba4a	Tubulin alpha-4A chain (Fragment)	MOUSE	5	61.7	79.16	0.788	-0.315	-0.05	-0.111	0.366	0.641	0.77	0.457	0.461065	0.999706
Q6P1J1	Q6P1J1|Q71H75|A0A0J9YTX5|A0A0J9YUZ1	Crmp1	Crmp1 protein	MOUSE	49	87.7	865.62	-0.024	-0.165	0.025	0.046	0.046	-0.007	-0.055	0.119	0.357141	0.999706
O08553	O08553	Dpysl2	Dihydropyrimidinase-related protein 2	MOUSE	43	89.6	770.22	0.016	-0.112	0.075	0.052	0.069	0.032	0.041	0.171	0.327633	0.999706
E9PWE8	E9PWE8|Q62188|Q3TT92	Dpysl3	Dihydropyrimidinase-related protein 3	MOUSE	43	86.9	742.08	-0.03	-0.117	0.062	0.083	0.048	-0.042	-0.056	0.13	0.253753	0.999706
P97427	P97427	Crmp1	Dihydropyrimidinase-related protein 1	MOUSE	40	88.9	704.2	0.136	-0.031	0.145	-0.019	-0.122	0.008	0.436	0.224	0.219774	0.999706
O35098	O35098|Q3TMU8|A0A0R4J1N0	Dpysl4	Dihydropyrimidinase-related protein 4	MOUSE	39	79.8	643.39	0.012	-0.179	-0.037	-0.053	0.067	0.018	0.091	0.112	0.526217	0.999706
D3Z360	D3Z360	Dpysl4	Dihydropyrimidinase-related protein 4 (Fragment)	MOUSE	11	92.3	199.89	0.497	0.047	0.16	-0.021	-0.082	0.286	0.73	0.195	0.429662	0.999706
Q3UHU8	Q3UHU8|Q9ESZ8|G3UYD0|G3UYJ6|G3UWV2|G3UZU4|G3UYD7|G3UX27|G3UWP6|G3UY14|Q99NI3	Gtf2i	General transcription factor II-I	MOUSE	62	73.5	863.88	-0.075	0.06	-0.021	0.015	-0.024	-0.09	-0.191	-0.107	0.667352	0.999706
P70232	P70232|A0A0N4SUL1	Chl1	Neural cell adhesion molecule L1-like protein	MOUSE	55	57.3	862.5	0.211	0.077	0.145	0.073	-0.098	-0.088	-0.129	-0.005	0.953451	0.999706
A0A0N4SUM4	A0A0N4SUM4	Chl1	Neural cell adhesion molecule L1-like protein	MOUSE	14	49.7	219.44	0.585	0.407	0.629	0.324	-0.204	-0.234	-0.117	0.035	0.717752	0.999706
Q7TT37	Q7TT37	Elp1	Elongator complex protein 1	MOUSE	59	52.6	862.48	0.011	-0.012	-0.055	-0.008	-0.026	0.04	0.061	0.057	0.986393	0.999706
P70168	P70168	Kpnb1	Importin subunit beta-1	MOUSE	50	69.5	862.46	-0.126	-0.124	-0.001	-0.028	0.059	0.019	-0.002	0.063	0.866248	0.999706
Q3TXS7	Q3TXS7|J3QN38|D6RGR5	Psmd1	26S proteasome non-ATPase regulatory subunit 1	MOUSE	55	66.4	859.91	-0.016	-0.178	-0.031	-0.012	0.049	0.015	-0.01	0.129	0.471698	0.999706
Q9ERK4	Q9ERK4|E9Q1T9|F6ZEW4|E9QAX7|F7D1H9	Cse1l	Exportin-2	MOUSE	55	67	859.08	-0.096	-0.054	-0.141	-0.03	0.003	0.054	-0.023	0.055	0.547919	0.999706
B7ZCJ1	B7ZCJ1|A0A0A0MQE8|B7ZCJ0|G3UWM5|G3UX38|A2BHQ2|F6WQR2	Arhgap21	Rho GTPase-activating protein 21	MOUSE	71	38.6	857.84	0.037	-0.019	0.017	-0.041	-0.017	-0.055	-0.036	-0.002	0.930101	0.999706
Q6DFV3	Q6DFV3	Arhgap21	Rho GTPase-activating protein 21	MOUSE	70	38.2	833.29	0.31	-0.01	0.23	0.092	-0.162	-0.164	0.112	-0.052	0.34437	0.999706
B1AQY2	B1AQY2|Q69ZH9|F8VQ11|D6RDB5	Arhgap23	Rho GTPase-activating protein 23	MOUSE	53	42.4	694.23	-0.006	-0.083	-0.019	-0.086	0.038	0.026	-0.032	0.002	0.873398	0.999706
F8VQN6	F8VQN6|Q8R4H2	Arhgef12	Rho guanine nucleotide exchange factor 12	MOUSE	63	48.2	856.4	0.002	-0.044	-0.007	-0.065	0.035	0.102	0.095	0.069	0.946226	0.999706
Q8BU30	Q8BU30|E9Q866|F6Q6R1	Iars1	Isoleucine--tRNA ligase, cytoplasmic	MOUSE	64	54.6	856.07	-0.001	0.132	-0.092	-0.038	0.002	0.031	-0.073	-0.07	0.188888	0.999706
Q8CC88	Q8CC88	Vwa8	von Willebrand factor A domain-containing protein 8	MOUSE	68	39.7	855.49	-0.046	0.297	0.056	0.159	-0.036	-0.121	-0.152	-0.046	0.720264	0.999706
A0JNY3	A0JNY3|Q8BUV3	Gphn	Molybdopterin molybdenumtransferase	MOUSE	52	79	853.82	-0.04	-0.139	-0.042	-0.082	0.087	0.025	-0.056	-0.031	0.684371	0.999706
Q69ZW3	Q69ZW3|Q5SS55	Ehbp1	EH domain-binding protein 1	MOUSE	62	55.7	848.52	-0.039	-0.167	-0.046	-0.137	0.031	0.067	0.051	0.012	0.836141	0.999706
E9QM73	E9QM73|E9QMI8|E0CYT1|E9QMI9|E9QJQ9|E9Q6Q2|Q3UH66|A0A0R4J1Z1|F6SRP4|F7BQG5|E9Q470	Wnk2	Non-specific serine/threonine protein kinase	MOUSE	58	31.5	848.04	0.069	-0.116	-0.002	-0.061	-0.035	0.002	0.026	-0.019	0.774692	0.999706
E0CZE3	E0CZE3	Wnk2	Non-specific serine/threonine protein kinase	MOUSE	57	32.8	831.6	-0.09	-0.072	-0.012	-0.239	-0.126	-0.134	-0.077	-0.268	0.0201257	0.999706
P83741	P83741|Q80UE6|E9PZ38|F7CC62|F7CZC4|F6TAR7|F6U2S8	Wnk1	Serine/threonine-protein kinase WNK1	MOUSE	40	20.7	476.52	0.009	-0.095	-0.077	-0.054	0.043	0.015	0.154	0.044	0.854839	0.999706
V9GWU7	V9GWU7|Q80XP9|V9GXP7	Wnk3	Non-specific serine/threonine protein kinase	MOUSE	39	21.5	473.8	-0.039	-0.17	-0.033	-0.163	0.064	0.074	0.077	-0.071	0.405771	0.999706
P63038	P63038|D3Z2F2|D3Z7J9	Hspd1	60 kDa heat shock protein, mitochondrial	MOUSE	50	81.5	847.37	-0.013	0.176	0.091	0.171	-0.039	-0.099	-0.135	0.042	0.585883	0.999706
P20152	P20152|A0A0A6YWC8|A2AKJ2|G3X981|A0A2R8W6R6|G5E846|P15331	Vim	Vimentin	MOUSE	54	88.4	844.5	-0.001	-0.125	-0.033	0.042	0.039	0.034	0.157	0.127	0.46217	0.999706
A0A0R4J036	A0A0R4J036|P08553|D3YZ35	Nefm	160 kDa neurofilament protein	MOUSE	47	59	693.23	0.11	-0.1	-0.008	-0.197	-0.12	-0.05	0.017	-0.236	0.125251	0.999706
P46660	P46660	Ina	Alpha-internexin	MOUSE	41	81	606.33	0.056	-0.145	-0.017	-0.195	-0.057	-0.016	-0.042	-0.179	0.14581	0.999706
P08551	P08551	Nefl	Neurofilament light polypeptide	MOUSE	36	66.1	553.14	0.091	-0.128	-0.076	-0.225	-0.166	-0.09	-0.121	-0.268	0.116376	0.999706
P19246	P19246	Nefh	Neurofilament heavy polypeptide	MOUSE	26	23.2	320.08	0.132	-0.053	0.035	-0.079	0.009	0.032	0.137	0.013	0.485856	0.999706
P31001	P31001	Des	Desmin	MOUSE	6	10.8	69.51	0.065	-0.105	0.368	0.155	0.937	0.823	0.818	1.121	0.145861	0.999706
Q8CGK3	Q8CGK3	Lonp1	Lon protease homolog, mitochondrial	MOUSE	56	68.1	843.16	-0.102	0.365	0.008	0.132	-0.024	-0.143	-0.244	-0.133	0.619349	0.999706
Q9JLM8	Q9JLM8|A0A0G2JGR9	Dclk1	Serine/threonine-protein kinase DCLK1	MOUSE	53	72	842.01	-0.077	-0.238	-0.088	-0.095	0.111	0.092	0.065	0.054	0.876253	0.999706
Q80VB6	Q80VB6	Dclk1	Dclk1 protein	MOUSE	35	77.9	492.54	-0.075	-0.124	-0.329	-0.233	-0.036	-0.022	-0.158	-0.165	0.0301359	0.999706
O88809	O88809	Dcx	Neuronal migration protein doublecortin	MOUSE	32	80.6	439.32	-0.176	-0.222	-0.262	-0.077	-0.007	0.04	-0.076	-0.017	0.350735	0.999706
Q9CXL6	Q9CXL6	Dcx	Neuronal migration protein doublecortin	MOUSE	31	79.7	418.61	-0.135	-0.272	-0.132	-0.226	-0.148	-0.11	-0.07	-0.123	0.0911842	0.999706
H7BX36	H7BX36|A0A0G2JEN4|A0A0G2JGH1|Q1EDH1	Dclk1	Serine/threonine-protein kinase DCLK1	MOUSE	17	64.2	304.25	0.2	-0.288	0.148	0.12	0.61	0.328	0.649	0.715	0.064853	0.999706
G5E870	G5E870|A0A087WNZ7|A0A0B4J1N9|A0A087WRV6|A0A087WSG4|Q3TP48|A0A087WS65|A0A087WS33	Trip12	E3 ubiquitin-protein ligase TRIP12	MOUSE	64	37.3	841.52	0.052	0.22	-0.004	0.001	-0.005	0.011	-0.029	-0.03	0.409652	0.999706
A0A087WP92	A0A087WP92|A0A087WQ02	Trip12	E3 ubiquitin-protein ligase TRIP12 (Fragment)	MOUSE	10	22.6	106.72	0.201	0.432	0.2	-0.136	-0.133	-0.008	0.261	-0.125	0.154097	0.999706
Q02248	Q02248|E9Q6A9|F7CRC6|D3YUH4|F7BAC9|F6QZ47|E9PW26|D3Z5Q1|D3Z7S6	Ctnnb1	Catenin beta-1	MOUSE	49	82	838.76	0.1	0.003	0.06	-0.044	0	-0.005	0.009	0.017	0.829496	0.999706
Q02257	Q02257	Jup	Junction plakoglobin	MOUSE	36	58.7	532.66	0.206	0.126	0.186	0.15	-0.122	-0.099	-0.145	-0.03	0.967551	0.999706
P23819	P23819|G5E8H1|A0A0A6YW90	Gria2	Glutamate receptor 2	MOUSE	52	57.5	835.92	-0.016	0.057	-0.067	-0.085	0.064	0.005	-0.103	-0.16	0.158472	0.999706
Q9Z2W9	Q9Z2W9|B0QZW2	Gria3	Glutamate receptor 3	MOUSE	41	45.1	571.62	0.068	0.018	-0.028	-0.204	-0.004	0.04	0.047	-0.12	0.0953093	0.999706
P23818	P23818|F6YNQ1	Gria1	Glutamate receptor 1	MOUSE	40	46	583.6	0.129	0.022	0.256	0.02	0.138	0.059	-0.063	0.058	0.653178	0.999706
Q7TNB5	Q7TNB5	Gria1	Glutamate receptor	MOUSE	40	46	582.46	0.102	0.347	-0.037	-0.126	-0.233	-0.047	-0.046	-0.116	0.360574	0.999706
Q9Z2W8	Q9Z2W8|E9PX01	Gria4	Glutamate receptor 4	MOUSE	31	36.1	433.65	0.117	0.091	0.088	0.024	-0.045	0.028	-0.003	-0.105	0.602938	0.999706
Q921M3	Q921M3	Sf3b3	Splicing factor 3B subunit 3	MOUSE	58	56.6	834.66	0.008	-0.217	-0.035	-0.134	0.011	0.055	0.104	0.002	0.620575	0.999706
Q8BH59	Q8BH59|V9GXX9	Slc25a12	Calcium-binding mitochondrial carrier protein Aralar1	MOUSE	52	80.9	832.81	-0.17	0.532	-0.004	0.206	-0.177	-0.184	-0.346	-0.441	0.450796	0.999706
Q9QXX4	Q9QXX4	Slc25a13	Calcium-binding mitochondrial carrier protein Aralar2	MOUSE	11	13.1	129.71	0.215	0.653	0.296	0.351	0.067	0.135	0.294	0.224	0.0809387	0.999706
A0A0M3HEP7	A0A0M3HEP7|A0A0J9YV34|Q3U9N5|E9Q4J5|F6Q8P7|Q148W0|A0A494BB33	Atp8a1	Phospholipid-transporting ATPase	MOUSE	57	51	830.76	-0.006	-0.062	-0.004	-0.03	0.067	0.053	0.017	0.058	0.977476	0.999706
P70704	P70704	Atp8a1	Phospholipid-transporting ATPase IA	MOUSE	57	51.2	819.85	0.158	0.048	0.322	0.094	-0.019	0.053	0.07	0.202	0.309448	0.999706
P98200	P98200|E9Q8X4|D6RG72	Atp8a2	Phospholipid-transporting ATPase IB	MOUSE	38	35.9	502.61	0.13	0.032	0.057	-0.016	-0.06	0.021	0.037	-0.034	0.838796	0.999706
D3Z2Z6	D3Z2Z6	Atp8a2	Phospholipid-transporting ATPase IB (Fragment)	MOUSE	4	58.9	57.17	0.249	0.174	0.145	-0.011	0.032	0.018	0.268	0.252	0.481325	0.999706
F8WGR0	F8WGR0|D3Z0T1|F6RDR0|F6V4G5	Add1	Alpha-adducin	MOUSE	51	87.7	828.24	-0.038	-0.107	0.039	-0.056	-0.016	-0.033	-0.017	-0.034	0.657198	0.999706
E9Q1K3	E9Q1K3	Add1	Alpha-adducin	MOUSE	49	86	795.98	0.101	-0.187	0.194	0.016	-0.126	0.047	0.056	-0.075	0.534606	0.999706
Q9QYC0	Q9QYC0	Add1	Alpha-adducin	MOUSE	49	75.3	787.32	-0.136	-0.306	-0.427	-0.457	0.009	0.259	0.14	-0.064	0.505401	0.999706
Q9ES28	Q9ES28|D3Z0V2|A0A1B0GSX2|F6WMJ3|Q8K4I3|A2AFJ8|H3BJ53	Arhgef7	Rho guanine nucleotide exchange factor 7	MOUSE	55	69.9	826.87	-0.032	-0.135	-0.033	0.024	0.078	0.057	0.018	0.104	0.67287	0.999706
A0A0R4J0X8	A0A0R4J0X8|A0A1B0GRS3	Arhgef7	Rho guanine nucleotide exchange factor 7	MOUSE	41	66	589.97	0.507	-0.172	0.845	0.5	0.937	0.251	0.394	1.109	0.0254193	0.999706
P30999	P30999|G3X9V2|E9Q8Z8|E9Q8Z6|D3Z2H2|E9Q8Z9|E9Q8Z4|E9Q904|E9Q901|D3Z7H6|E9Q905|E9Q907|E9Q986|D3Z2H7	Ctnnd1	Catenin delta-1	MOUSE	60	70.1	826.86	-0.012	-0.066	0	-0.045	-0.012	-0.031	-0.006	0.033	0.904675	0.999706
E9Q8Z5	E9Q8Z5|E9Q903|E9Q906	Ctnnd1	Catenin delta-1	MOUSE	58	68.2	811.86	0.247	0.064	0.395	0.064	0.015	-0.006	0.185	0.171	0.0993894	0.999706
E9Q411	E9Q411	Nbas	Neuroblastoma-amplified sequence	MOUSE	65	29.3	825.26	0.068	0.01	-0.027	-0.061	0.017	0.067	0.059	-0.004	0.749119	0.999706
Q3U1J4	Q3U1J4|A0A494B987|A0A494BAF6|A0A494BBJ6	Ddb1	DNA damage-binding protein 1	MOUSE	57	54	824.57	-0.019	-0.207	-0.048	-0.073	0.03	0.082	0.058	0.093	0.899318	0.999706
Q6V4S5	Q6V4S5|B1ASR7	Sdk2	Protein sidekick-2	MOUSE	63	36.2	822.59	0.049	0.048	0.059	0.062	-0.018	-0.08	-0.059	0.053	0.818727	0.999706
P20029	P20029	Hspa5	Endoplasmic reticulum chaperone BiP	MOUSE	51	74.5	822.13	0.01	-0.058	-0.004	-0.045	0.026	0.022	-0.038	0.044	0.967057	0.999706
P63017	P63017|Q504P4|D3Z5E2	Hspa8	Heat shock cognate 71 kDa protein	MOUSE	48	80.4	796.7	-0.056	-0.082	-0.013	0.025	0.031	0.021	-0.076	0.071	0.694854	0.999706
P17156	P17156	Hspa2	Heat shock-related 70 kDa protein 2	MOUSE	42	69.9	616.03	-0.128	-0.296	-0.211	-0.141	0.134	0.144	0.06	0.111	0.889188	0.999706
Q61696	Q61696|P17879	Hspa1a	Heat shock 70 kDa protein 1A	MOUSE	37	69.7	541.52	-0.25	-0.283	-0.155	-0.116	0.241	0.19	0.091	0.243	0.93718	0.999706
P16627	P16627	Hspa1l	Heat shock 70 kDa protein 1-like	MOUSE	16	28.2	212.07	-0.036	0.059	0.167	0.105	0.021	-0.057	0.001	0.12	0.415124	0.999706
O35382	O35382|Q8C391|Q9CXE1	Exoc4	Exocyst complex component 4	MOUSE	55	67.6	818	0.015	-0.072	-0.098	-0.041	0.044	0.042	0.026	0.024	0.880067	0.999706
Q810B6	Q810B6	Ankfy1	Rabankyrin-5	MOUSE	53	62.1	816.9	-0.018	-0.013	0.054	0.018	0.03	0.02	-0.044	0.037	0.990889	0.999706
F8WHN4	F8WHN4|A2ACC6|E9Q0J2|Q8BQZ4|A2ACC7	Ralgapb	Ral GTPase-activating protein subunit beta	MOUSE	60	45.9	816.65	-0.056	-0.103	-0.084	-0.119	0.029	0.047	-0.008	-0.017	0.803235	0.999706
Q6PAR5	Q6PAR5|F6X819|F7ADQ2|F7ADT6|E9Q0D1|F6YRL2	Gapvd1	GTPase-activating protein and VPS9 domain-containing protein 1	MOUSE	60	43	811.6	0.019	-0.048	-0.03	-0.036	0.032	0.041	0.054	0.019	0.976855	0.999706
F7ADS7	F7ADS7	Gapvd1	GTPase-activating protein and VPS9 domain-containing protein 1 (Fragment)	MOUSE	28	40	402.89	-0.098	-0.081	0.31	0.112	0.017	-0.2	-0.151	0.165	0.388677	0.999706
Q91VD9	Q91VD9|A0A087WQR0|A0A087WQ77|A0A087WSU3	Ndufs1	NADH-ubiquinone oxidoreductase 75 kDa subunit, mitochondrial	MOUSE	50	81.8	808.08	-0.138	0.139	-0.022	0.046	-0.043	-0.125	-0.233	-0.046	0.551997	0.999706
Q64737	Q64737|D6RCG1|A0A338P6X4|A0A338P676|A0A338P6W0|A0A338P6T2	Gart	Trifunctional purine biosynthetic protein adenosine-3	MOUSE	50	58.7	807.56	0.078	0.054	0.103	0.077	-0.059	-0.062	-0.084	0.016	0.947697	0.999706
O35551	O35551|J3QJV7|Q3U983	Rabep1	Rab GTPase-binding effector protein 1	MOUSE	61	64.6	803.31	0.022	-0.18	-0.095	-0.07	0.036	0.092	0.028	0.104	0.889321	0.999706
J3QNR6	J3QNR6|Q9ESN9|K3W4S4|E9Q6E0|E9Q6B6|D3YWH6	Mapk8ip3	C-Jun-amino-terminal kinase-interacting protein 3	MOUSE	56	46.6	802.88	0.001	-0.103	-0.015	-0.107	0.023	0.071	0.076	0.061	0.944238	0.999706
Q58A65	Q58A65|F6SH61|Z4YMB8	Spag9	C-Jun-amino-terminal kinase-interacting protein 4	MOUSE	49	42.7	663.91	0.089	-0.182	-0.122	-0.154	0.138	0.072	0.355	0.008	0.4394	0.999706
A0A0R4J196	A0A0R4J196|F8WH31|E9PUD1|F6WNT4	Spag9	C-Jun-amino-terminal kinase-interacting protein 4	MOUSE	45	44.4	609.46	-0.197	-0.052	-0.342	-0.156	0.204	0.157	0.099	-0.093	0.567113	0.999706
P58871	P58871|Z4YJL4|A0A571BEG9	Tnks1bp1	182 kDa tankyrase-1-binding protein	MOUSE	62	43.9	800.11	0.01	-0.224	-0.125	-0.316	0.118	0.168	0.154	-0.003	0.422881	0.999706
P47857	P47857|A0A2R8VHV2|A0A2R8VHA5	Pfkm	ATP-dependent 6-phosphofructokinase, muscle type	MOUSE	51	76	796.14	-0.029	-0.099	0.067	0.064	0.05	-0.012	-0.015	0.12	0.37926	0.999706
Q9WUA3	Q9WUA3|Q8C605|F6YL81	Pfkp	ATP-dependent 6-phosphofructokinase, platelet type	MOUSE	47	73.5	794.01	-0.032	-0.15	0.022	0.053	0.095	0.033	-0.001	0.177	0.331432	0.999706
P12382	P12382|A0A1W2P7T1	Pfkl	ATP-dependent 6-phosphofructokinase, liver type	MOUSE	44	59.1	659.31	-0.02	-0.145	-0.062	-0.009	0.058	0.093	0.04	0.166	0.710107	0.999706
D3YUA3	D3YUA3	Pfkp	ATP-dependent 6-phosphofructokinase, platelet type (Fragment)	MOUSE	10	86.8	199.77	0.016	-0.891	-1.438	-0.615	-0.065	0.226	-0.609	0.652	0.104469	0.999706
H7BX15	H7BX15|E9Q3V9|F6YP92|D6RI60|A0A0G2JDH6|A0A0G2JE37|A0A0G2JDU4	Adgrl1	Adhesion G protein-coupled receptor L1	MOUSE	50	44.5	794.54	0.032	-0.132	-0.019	-0.062	-0.032	-0.008	-0.078	0.033	0.802907	0.999706
Q80TR1	Q80TR1|E9Q9Q9	Adgrl1	Adhesion G protein-coupled receptor L1	MOUSE	49	44.6	783.97	-0.33	-0.122	0.051	0.107	0.113	-0.253	-0.596	0.034	0.549771	0.999706
D3Z5M6	D3Z5M6|D3Z4S7|D3YVT9|D3Z634|D3Z3G4|D3Z593|K3W4M8|D3Z6H7|D3Z3X6|D3Z6H9|D3YWB1|D3Z4V0|D3Z6J2|D3YU23|D3YWR3	Adgrl3	Adhesion G protein-coupled receptor L3	MOUSE	48	36.1	713.15	-0.019	-0.177	-0.061	-0.112	0.034	-0.009	-0.058	0.005	0.550365	0.999706
A0A0G2JGM8	A0A0G2JGM8|A0A0G2JDK6|A0A0G2JFF5|A0A0G2JG66|Q8JZZ7|A0A0G2JDF4|A0A0G2JFV3|A0A0G2JDE3|A0A0G2JH16|A0A0G2JEQ8|A0A0G2JGC2|Q0P6A0|A0A0G2JGZ4	Adgrl2	Adhesion G protein-coupled receptor L2	MOUSE	39	30.8	558.93	0.028	-0.208	-0.044	-0.157	-0.014	0.032	0.022	0.015	0.711121	0.999706
F6WMY5	F6WMY5	Adgrl3	Adhesion G protein-coupled receptor L3 (Fragment)	MOUSE	21	26.8	298.12	0.247	0.083	0.296	0.071	0.056	0.2	0.523	0.352	0.0679949	0.999706
Q9QUR6	Q9QUR6	Prep	Prolyl endopeptidase	MOUSE	49	80.2	794.45	-0.004	-0.117	0.015	0.007	0.025	0.04	0.056	0.113	0.655559	0.999706
Q923L3	Q923L3	Csmd1	CUB and sushi domain-containing protein 1	MOUSE	57	22.4	793.3	-0.039	-0.066	-0.049	-0.175	0.07	0.067	0.125	-0.085	0.227452	0.999706
Q80T79	Q80T79|E9PWJ0|F6TRD7	Csmd3	CUB and sushi domain-containing protein 3	MOUSE	33	11.1	410.99	0.004	0.025	0.018	-0.123	0.029	0.038	0.105	-0.072	0.189384	0.999706
Q8CJ40	Q8CJ40	Crocc	Rootletin	MOUSE	70	33.8	790.93	0.081	-0.011	0.001	-0.046	0.019	0.025	0.103	0.056	0.855113	0.999706
E9PYT0	E9PYT0|P97393|A0A1W2P6H9	Arhgap5	Rho GTPase-activating protein 5	MOUSE	59	48.3	790.51	0.014	-0.09	-0.016	-0.005	0.004	-0.002	0.015	0.019	0.871313	0.999706
P40142	P40142|A0A286YE28|E0CY51	Tkt	Transketolase	MOUSE	47	84.2	790.13	0.027	-0.099	0.062	0.113	0.052	-0.025	-0.068	0.153	0.184492	0.999706
A2A9Q2	A2A9Q2|Q8BHG1|A6PWC3|Q3V3G9	Nrd1	Nardilysin, N-arginine dibasic convertase, NRD convertase 1	MOUSE	52	52.8	789.93	0.064	-0.098	0.032	-0.043	-0.032	0.045	-0.002	-0.031	0.918942	0.999706
G3XA17	G3XA17|F7CBP1|F6TW20|F7DAB1|F6UU81|F7CHS2	Eif4g2	Eukaryotic translation initiation factor 4 gamma 2	MOUSE	59	61.8	789.79	-0.074	-0.082	-0.184	-0.217	0.057	0.084	-0.017	-0.12	0.143394	0.999706
Q8BGD9	Q8BGD9|B2RWE8	Eif4b	Eukaryotic translation initiation factor 4B	MOUSE	62	72.9	789.13	-0.014	-0.328	-0.179	-0.179	0.106	0.159	0.108	0.02	0.79213	0.999706
Q99P88	Q99P88|A0A2R8VHH1	Nup155	Nuclear pore complex protein Nup155	MOUSE	52	49.7	787.99	0.039	0.174	-0.035	-0.063	-0.085	0.048	0.043	0.011	0.456106	0.999706
P35564	P35564	Canx	Calnexin	MOUSE	51	64.1	786.97	0.01	0.364	-0.015	0.065	-0.039	-0.086	-0.272	-0.196	0.313062	0.999706
A0A286YCI8	A0A286YCI8|Q62417|E9QNA7|D3Z5J3|E9PYX6|A0A286YDN0|A0A286YCQ0|E9Q6A3|A0A286YD34|A0A286YCN8|A0A668KLG2|A0A286YDJ3	Sorbs1	Sorbin and SH3 domain-containing protein 1	MOUSE	61	49.7	755.6	0.031	-0.204	-0.146	-0.251	0.019	0.047	0.05	-0.066	0.343178	0.999706
Q3UTJ2	Q3UTJ2|A0A0R4J1W0|A0A0R4J1X5	Sorbs2	Sorbin and SH3 domain-containing protein 2	MOUSE	60	57.6	777.51	0.814	-0.386	-0.392	-0.931	-0.253	0.389	0.593	-0.275	0.461281	0.999706
A0A0R4J1T1	A0A0R4J1T1|Z4YJR7|F7BEU1|F6V513	Sorbs2	Sorbin and SH3 domain-containing protein 2 (Fragment)	MOUSE	59	61.3	786.94	0.016	-0.293	-0.231	-0.457	0.242	0.311	0.368	0.073	0.494881	0.999706
A0A668KL65	A0A668KL65	Sorbs1	Sorbin and SH3 domain-containing protein 1 (Fragment)	MOUSE	37	40	465.63	0.157	-0.159	0.101	-0.121	-0.152	-0.014	-0.132	-0.128	0.72873	0.999706
B2RXQ9	B2RXQ9|A0A1B0GRC3|D3Z203|D3Z0N2|A0A1B0GRL6|D3Z2C7|D3Z0E9	Sorbs2	Sorbin and SH3 domain-containing protein 2	MOUSE	37	62.8	463.03	-0.519	-0.214	-0.325	-0.093	0.632	0.38	0.154	0.094	0.971406	0.999706
P48678	P48678|D3YUF7	Lmna	Prelamin-A/C	MOUSE	58	72.1	786.03	-0.112	-0.255	-0.079	-0.194	0.087	0.123	0.184	0.079	0.785264	0.999706
Q9ER72	Q9ER72|A0A140LII7|A0A140LIB6	Cars1	Cysteine--tRNA ligase, cytoplasmic	MOUSE	52	70.1	785.08	-0.01	-0.164	0.005	-0.036	0.033	0.042	0.027	0.042	0.818462	0.999706
Q3UHJ0	Q3UHJ0|A0A0N4SVA1	Aak1	AP2-associated protein kinase 1	MOUSE	49	64.3	784.93	-0.036	-0.21	-0.079	-0.072	0.019	0.048	0.1	0.071	0.795523	0.999706
Q91Z96	Q91Z96	Bmp2k	BMP-2-inducible protein kinase	MOUSE	11	10.3	137.05	0.069	-0.009	-0.05	-0.14	-0.072	0.009	0.069	-0.056	0.63162	0.999706
A0A571BEI2	A0A571BEI2|Q6PIU9	Aak1	AP2-associated protein kinase 1 (Fragment)	MOUSE	10	30.9	150.08	0.218	-0.038	0.093	0.041	-0.144	-0.022	0.121	-0.002	0.753561	0.999706
A0A571BDM4	A0A571BDM4	Aak1	AP2-associated protein kinase 1 (Fragment)	MOUSE	8	54.4	126.14	0.258	0.833	-0.145	0.649	0.799	0.087	0.903	-0.219	0.704802	0.999706
Q3UHD9	Q3UHD9|A0A5F8MPB7	Agap2	Arf-GAP with GTPase, ANK repeat and PH domain-containing protein 2	MOUSE	57	52.4	784.78	-0.026	-0.125	-0.068	-0.136	0.04	0.078	0.027	-0.027	0.731484	0.999706
Q60902	Q60902|A0A1D5RLS1	Eps15l1	Epidermal growth factor receptor substrate 15-like 1	MOUSE	51	71.6	781.62	-0.033	-0.177	-0.04	-0.105	0.024	0.022	0.027	0.061	0.804146	0.999706
F6RPJ9	F6RPJ9|Q9JHR7	Ide	Insulin-degrading enzyme (Fragment)	MOUSE	58	63	780.37	0.074	-0.112	0.006	-0.008	-0.003	0.027	0.002	0.08	0.804742	0.999706
Q91ZW3	Q91ZW3	Smarca5	SWI/SNF-related matrix-associated actin-dependent regulator of chromatin subfamily A member 5	MOUSE	62	54.1	780.36	-0.005	0.325	0.082	0.093	-0.112	-0.123	-0.107	-0.033	0.706251	0.999706
Q6PGB8	Q6PGB8|Q8BS67	Smarca1	Probable global transcription activator SNF2L1	MOUSE	38	33.9	440.73	0.163	0.151	0.094	0.037	0.022	0.032	0.094	0.005	0.424488	0.999706
F6Z6F4	F6Z6F4	Smarca1	Probable global transcription activator SNF2L1 (Fragment)	MOUSE	26	30.9	287.16	-1.212	0.526	0.684	0.717	-0.076	-1.102	-1.733	-0.336	0.788623	0.999706
E9PUW7	E9PUW7|Q9EPK7|A0A2I3BQV5	Xpo7	Exportin-7	MOUSE	52	60.5	780.15	-0.046	-0.067	-0.122	-0.011	0.015	0.072	0.059	0.059	0.942094	0.999706
A0A5F8MPY3	A0A5F8MPY3|P34152|A0A2I3BRG7|A0A2I3BPK4|A0A2I3BQ85|A0A2I3BR46	Ptk2	Non-specific protein-tyrosine kinase	MOUSE	58	55.1	779.33	0.043	-0.093	0.002	0.021	0.01	0.028	0.006	0.085	0.745642	0.999706
O88508	O88508|G3UXY2|G3UZK0|G3UX07|G3UZN5|G3UZF8|G3UZG8|G3UX63|G3UY43|G3UZH2|G3UZU0	Dnmt3a	DNA (cytosine-5)-methyltransferase 3A	MOUSE	55	68.8	778.59	-0.041	0.004	0.081	-0.167	-0.008	-0.057	-0.046	-0.254	0.0579525	0.999706
P38647	P38647	Hspa9	Stress-70 protein, mitochondrial	MOUSE	50	74.3	776.27	-0.041	0.309	0.039	0.15	-0.023	-0.084	-0.17	-0.054	0.582914	0.999706
A0A1B0GSX7	A0A1B0GSX7|Q6PFD9|A0A140T8J8|B2RQL0|A0A1B0GRA7|A0A1B0GRB5|A0A1B0GS62	Nup98	Nuclear pore complex protein Nup96	MOUSE	56	36.4	775.65	-0.041	-0.091	-0.043	-0.065	-0.002	-0.002	0.032	-0.026	0.861527	0.999706
Q8CJH3	Q8CJH3|Q9QY40|A0A0G2JDM9	Plxnb1	Plexin-B1	MOUSE	56	35.2	774.48	0.022	0.191	0.079	0.177	-0.092	-0.116	-0.143	-0.065	0.814053	0.999706
Q8BYA0	Q8BYA0|B1ATU0|F6UI15	Tbcd	Tubulin-specific chaperone D	MOUSE	52	51.7	774.28	0.019	-0.006	-0.038	0.02	-0.004	0.047	0.04	0.055	0.955543	0.999706
D3YUP0	D3YUP0|Q0P5W1|F8WI64|F6ZLN8|D3Z2G2	Vps8	Vacuolar protein sorting-associated protein 8 homolog	MOUSE	55	47.3	773.22	0.004	-0.047	-0.107	-0.07	0.036	0.069	0.036	0.011	0.879063	0.999706
Q9D0E1	Q9D0E1|B8JK32|B8JK33|A0A3Q4EH91|F6W322|F7C9U3|A0A3Q4L2X3	Hnrnpm	Heterogeneous nuclear ribonucleoprotein M	MOUSE	57	79.9	773.21	0.054	0.144	0.084	0.026	0.078	0.013	-0.084	0.034	0.716511	0.999706
O89001	O89001	Cpd	Carboxypeptidase D	MOUSE	56	47.4	772.63	0.133	0.102	0.021	-0.088	-0.06	-0.088	-0.127	-0.169	0.298398	0.999706
A0A0R4J170	A0A0R4J170|Q3TKT4|G3UX35	Smarca4	Transcription activator BRG1	MOUSE	59	36	772.23	0.015	0.152	0.024	-0.052	-0.047	0.008	0.071	-0.082	0.331469	0.999706
H3BLH0	H3BLH0|F2Z4A9|Q6DIC0|E9QAB8|H3BJK2|A0A140LID0|H3BKN5|A0A140LJD7|A0A140LHF4|A0A140LHP6|H3BK47|A0A140LIM0|A0A140LI14|A0A140LIQ9|A0A140LHE2|H3BLI4|A0A140LHZ8|H3BKJ3|Q9D007|H3BJI1|A0A140LIV3|A0A140LJK1|H3BJM2|H3BKD2|A0A140LHL7|A0A140LIK7	Smarca2	Probable global transcription activator SNF2L2	MOUSE	43	25.6	553.01	0.066	-0.152	-0.054	-0.159	0.009	0.034	-0.015	-0.064	0.405994	0.999706
Q3UID0	Q3UID0|Q6PDG5|A0A1W2P6N7	Smarcc2	SWI/SNF complex subunit SMARCC2	MOUSE	59	55.5	771.97	-0.075	-0.11	0.009	-0.057	-0.015	0.016	0.02	-0.056	0.705295	0.999706
P97496	P97496|Q3UNN4|Q3UZD0	Smarcc1	SWI/SNF complex subunit SMARCC1	MOUSE	38	42.7	522.72	0.007	0.091	0.099	0.091	-0.064	-0.104	-0.066	-0.074	0.976676	0.999706
A0A5H1ZRM8	A0A5H1ZRM8|B1AWN6|A0A668KM74|Q62205|F8VPQ7|B1AYL0|E9PW82|F7AMU5|A0A0J9YVF2|Q9ER60|G3X8T7|A0A0R4J1M7|K3W4N7|Q9JJV9|A2APX9|K3W4P8|Q6QIY3|A9JQD3|A0A0J9YTW2|A0A0J9YTX0|F6U9Y2	Scn2a	Sodium channel protein	MOUSE	56	27.6	771.65	-0.022	0.019	-0.072	-0.107	-0.021	-0.039	-0.091	-0.137	0.225097	0.999706
A2ASI5	A2ASI5|A0A571BEB6|A9JQD4	Scn3a	Sodium channel protein type 3 subunit alpha	MOUSE	32	15.3	421.19	0.241	0.065	-0.087	-0.08	0.073	0	0.263	0.091	0.676171	0.999706
A2APX8	A2APX8	Scn1a	Sodium channel protein type 1 subunit alpha	MOUSE	18	6.7	224.16	0.099	-0.058	0.044	0.002	0.164	0.081	0.225	0.004	0.200943	0.999706
F6U329	F6U329|F7D6K4|A0A0J9YUW5|F7D6J5|Q9WTU3|A0A0J9YTW4|Q4KL32|A0A0J9YUK3	Scn8a	Sodium channel protein	MOUSE	18	8.3	191.84	0.154	-0.014	-0.04	0.112	-0.075	-0.142	-0.142	0.012	0.257629	0.999706
A0A571BFW3	A0A571BFW3|A0A571BG54	Scn3a	Sodium channel protein type 3 subunit alpha (Fragment)	MOUSE	11	12.9	132	0.207	0.199	0.162	0.163	-0.172	-0.054	0.054	-0.161	0.794371	0.999706
A2AQC3	A2AQC3|O70228|Q8C288|Q8C4G3|A2AQC9|A2AUZ0|A2AUZ1|B2FDH4	Atp9a	Phospholipid-transporting ATPase	MOUSE	52	53.1	771.1	0.108	0.093	0.057	-0.013	-0.027	0.048	-0.025	-0.043	0.597028	0.999706
D3YV00	D3YV00|P98195|A0A286YCV0|A0A286YDR0|A0A286YCT2|A0A286YDZ3	Atp9b	Phospholipid-transporting ATPase	MOUSE	21	19.4	287.51	0.021	-0.014	-0.034	-0.049	-0.038	0.004	-0.03	-0.089	0.723455	0.999706
P28271	P28271	Aco1	Cytoplasmic aconitate hydratase	MOUSE	52	66.8	769.94	-0.133	-0.057	0.104	0.087	0.064	-0.083	-0.138	0.098	0.613745	0.999706
Q62167	Q62167|Q3V086|Q61496	Ddx3x	ATP-dependent RNA helicase DDX3X	MOUSE	55	78.8	767.84	-0.073	0.087	-0.079	-0.095	0.051	-0.044	-0.083	-0.134	0.374085	0.999706
Q61656	Q61656|Q8BTS0|S4R1I6|B1ARB9|B1ARC0|S4R1E3	Ddx5	Probable ATP-dependent RNA helicase DDX5	MOUSE	53	73.2	751.52	-0.077	0.066	0.029	-0.144	-0.032	-0.054	-0.124	-0.119	0.396525	0.999706
Q3U741	Q3U741|Q501J6|Q3TU25	Ddx17	RNA helicase	MOUSE	48	57.6	654.6	0.001	0.032	0.005	-0.109	-0.013	0	-0.084	-0.092	0.377278	0.999706
Q62095	Q62095|A0A087WQV7	Ddx3y	ATP-dependent RNA helicase DDX3Y	MOUSE	46	65.3	634.51	-0.421	-0.376	-0.47	-0.59	0.334	0.302	0.354	0.182	0.896192	0.999706
P16381	P16381	D1Pas1	Putative ATP-dependent RNA helicase Pl10	MOUSE	38	52.1	527.26	-0.203	-0.166	-0.341	-0.18	0.089	0.067	-0.007	-0.042	0.45504	0.999706
G3X9V4	G3X9V4|Q01097|A0A0G2JEA7|Q01098	Grin2b	Glutamate receptor	MOUSE	56	39.6	767.74	-0.054	-0.124	-0.078	-0.11	0.106	0.148	0.125	0.096	0.991534	0.999706
P35436	P35436	Grin2a	Glutamate receptor ionotropic, NMDA 2A	MOUSE	27	22.6	328.02	0.019	-0.097	0.002	-0.131	0.067	0.074	0.137	0.134	0.832563	0.999706
Q9Z0E0	Q9Z0E0	Ncdn	Neurochondrin	MOUSE	44	66.5	767.32	-0.021	-0.149	-0.041	0.013	0.054	0.048	0.057	0.146	0.532468	0.999706
Q61137	Q61137|Q3TPU9|A0A0A6YVT7|A0A0A6YWD1	Astn1	Astrotactin-1	MOUSE	47	49	765.81	-0.04	0.026	0.038	-0.144	0.029	-0.024	-0.112	-0.115	0.381944	0.999706
A0A0A6YWE6	A0A0A6YWE6|A0A0A6YXJ4	Astn1	Astrotactin-1	MOUSE	40	46.1	647.84	-0.163	0.036	-0.32	-0.295	-0.096	-0.208	-0.309	-0.186	0.0514286	0.999706
Z4YJT3	Z4YJT3|Q6ZQ58	Larp1	La-related protein 1	MOUSE	56	58.5	765.26	-0.008	-0.207	-0.08	-0.258	0.011	0.029	0.038	-0.107	0.192329	0.999706
Q9JIF7	Q9JIF7	Copb1	Coatomer subunit beta	MOUSE	51	61.3	765.23	-0.045	0.01	-0.135	-0.022	0.024	0.058	-0.032	0.009	0.453536	0.999706
Q6PDS3	Q6PDS3	Sarm1	NAD(+) hydrolase SARM1	MOUSE	49	75.5	765.2	-0.054	0.084	0.082	0.087	0.01	-0.051	-0.105	-0.022	0.958144	0.999706
Q9EQH3	Q9EQH3	Vps35	Vacuolar protein sorting-associated protein 35	MOUSE	50	62	764.11	0.006	-0.097	-0.112	-0.122	0.039	0.083	0.048	0.061	0.940985	0.999706
P14824	P14824|F8WIT2	Anxa6	Annexin A6	MOUSE	54	76	763.57	0.004	-0.016	0.027	0.14	-0.028	-0.037	-0.109	0.115	0.163435	0.999706
Q91WQ3	Q91WQ3|F6VXZ2	Yars1	Tyrosine--tRNA ligase, cytoplasmic	MOUSE	55	88.8	763.53	-0.044	-0.158	-0.089	-0.092	0.047	0.084	-0.012	0.005	0.905143	0.999706
A2A7S7	A2A7S7	Yars	Tyrosine--tRNA ligase	MOUSE	54	84	758.16	0.206	-0.144	-0.642	-0.453	-0.082	0.472	0.559	-0.06	0.773155	0.999706
Q8K0T0	Q8K0T0	Rtn1	Reticulon-1	MOUSE	45	67.3	763.52	0.027	-0.109	-0.075	-0.109	0.004	0.03	-0.009	-0.025	0.707954	0.999706
Q7M6W1	Q7M6W1|A3QM89	Rtn1	Reticulon	MOUSE	10	51.4	170.41	0.023	-0.003	-0.03	-0.048	0.008	-0.024	0.047	0.118	0.964697	0.999706
Q6NZL0	Q6NZL0|A0A1L1SUV1	Soga3	Protein SOGA3	MOUSE	54	57.3	762.43	0.12	-0.112	-0.002	-0.051	-0.022	-0.016	0.006	0.003	0.662991	0.999706
A2ACV6	A2ACV6|E1U8D0	Soga1	Protein SOGA1	MOUSE	49	33.3	610.13	0.167	0.047	0.176	0.103	-0.056	-0.072	0.113	0.081	0.277776	0.999706
Q3UHU5	Q3UHU5|H3BL83|B8JJI7	Mtcl1	Microtubule cross-linking factor 1	MOUSE	14	5.7	133.06	0.15	0.001	0.058	-0.074	0.009	0.004	0.092	-0.082	0.222911	0.999706
H3BJD6	H3BJD6|Q7TN74|H3BL28|H3BJD0|H3BKQ7|Q3UXW4|H3BKE7|Q8BMP0|H3BJA6	Ppp1r9a	Protein phosphatase 1, regulatory subunit 9A	MOUSE	51	45.8	761.51	-0.064	-0.225	-0.135	-0.235	0.069	0.098	0.08	0.057	0.82582	0.999706
Q6R891	Q6R891	Ppp1r9b	Neurabin-2	MOUSE	47	65.7	758.46	-0.002	-0.231	-0.071	-0.239	0.04	0.097	0.082	-0.008	0.561129	0.999706
Q8VEK3	Q8VEK3	Hnrnpu	Heterogeneous nuclear ribonucleoprotein U	MOUSE	48	59.2	760.62	-0.067	0.401	-0.007	-0.008	-0.043	-0.036	-0.075	-0.12	0.30767	0.999706
P70175	P70175|A2BEE9|A2BEF2	Dlg3	Disks large homolog 3	MOUSE	51	64.4	759	-0.033	-0.175	-0.104	-0.103	0.021	0.034	-0.017	0.054	0.793562	0.999706
E9Q2L2	E9Q2L2|A0A571BEZ4|D3YWU0	Dlg2	Disks large homolog 2	MOUSE	46	57.8	713.28	-0.241	-0.393	-0.118	-0.116	0.381	-0.006	0.147	0.139	0.482461	0.999706
A0A338P6J0	A0A338P6J0|Q91XM9|A0A571BEK3|D3YUZ8	Dlg2	Disks large homolog 2	MOUSE	45	50.2	712.03	-0.088	-0.306	-0.111	-0.111	-0.044	0.136	0.174	0.213	0.768323	0.999706
Q810U3	Q810U3|A0A087WPX3|A0A087WR56|E9PW06|E9Q171|A0A087WNW2	Nfasc	Neurofascin	MOUSE	52	47.4	757.65	0.02	-0.008	0.014	-0.014	0.019	0.019	-0.001	0.017	0.995982	0.999706
P62814	P62814|Q91YH6|A0A0U1RNU9	Atp6v1b2	V-type proton ATPase subunit B, brain isoform	MOUSE	41	88.4	757.25	-0.091	-0.125	0.081	0.078	0.089	-0.065	-0.117	0.147	0.384229	0.999706
Q68FM7	Q68FM7|E9Q0A3|D6RGQ8|A0A1D5RLI4	Arhgef11	Rho guanine nucleotide exchange factor (GEF) 11	MOUSE	56	41.9	755.74	0.001	-0.087	-0.022	-0.093	0.093	0.059	0.022	0.033	0.818464	0.999706
Q922D8	Q922D8|A0A1W2P733|A0A1W2P7L5	Mthfd1	C-1-tetrahydrofolate synthase, cytoplasmic	MOUSE	50	72.6	755.45	0.088	0.224	0.102	0.171	-0.06	-0.147	-0.139	0.066	0.686375	0.999706
P80316	P80316|E0CZA1	Cct5	T-complex protein 1 subunit epsilon	MOUSE	48	87.8	754.92	-0.062	-0.103	-0.05	-0.005	0.043	-0.021	-0.068	0.082	0.514577	0.999706
P80315	P80315|G5E839|G3UYW5|G3UXG2|G3UXF3	Cct4	T-complex protein 1 subunit delta	MOUSE	47	86.6	732.01	-0.124	-0.074	-0.03	0.009	0.086	-0.037	-0.147	0.095	0.570181	0.999706
A0A0R4J0Z1	A0A0R4J0Z1|P08003|Q29RV1|F1MEN8	Pdia4	Protein disulfide-isomerase A4	MOUSE	51	72.8	753.83	0.034	-0.176	-0.054	-0.109	0.039	0.041	0.002	0.065	0.760522	0.999706
P27773	P27773|P38657|A5D7E8|F6Q404	Pdia3	Protein disulfide-isomerase A3	MOUSE	44	75	669.97	0.007	-0.23	-0.013	-0.109	0.005	-0.032	-0.071	0.028	0.48617	0.999706
Q91W50	Q91W50|Q8JZN2|A0A0G2JF72|A0A0G2JE62|A0A0G2JDJ7	Csde1	Cold shock domain-containing protein E1	MOUSE	55	70.5	753.21	-0.076	-0.165	-0.217	-0.278	0.107	0.09	0.027	-0.03	0.34937	0.999706
Q9Z1T6	Q9Z1T6|D3Z5N5|A0A087WQI1|A0A087WS78	Pikfyve	1-phosphatidylinositol 3-phosphate 5-kinase	MOUSE	62	33.5	752.58	0.021	-0.076	-0.042	-0.047	0.025	0.054	0.059	0.025	0.979454	0.999706
Q8CGF6	Q8CGF6|A0A0G2JFW8	Wdr47	WD repeat-containing protein 47	MOUSE	46	64.2	750.96	0.018	-0.122	-0.021	-0.081	-0.01	0.009	0.017	0.007	0.835758	0.999706
F8VQL0	F8VQL0|P16056|F6X333|D3YVY2|F6RCC5	Met	HGF/SF receptor	MOUSE	50	42.4	748.6	0.09	-0.028	0.043	-0.194	-0.025	0.003	-0.05	-0.139	0.134208	0.999706
G5E896	G5E896|Q3UJB9|A0A0R4J1Q0|D6RE33|F6ZJ27|F6V5I7	Edc4	Enhancer of mRNA-decapping protein 4	MOUSE	48	45.4	747.22	-0.035	-0.106	-0.164	-0.192	0.065	0.07	-0.006	-0.058	0.299502	0.999706
Q9D5V5	Q9D5V5|G3X914|E9PV12|E9Q6Z0|F8VQI6	Cul5	Cullin-5	MOUSE	53	69.2	747.12	0	-0.144	-0.017	-0.001	0.046	0.04	0.006	0.146	0.572464	0.999706
O88532	O88532|F6QJP7|D3Z5G4|F6V459|F6RTK9	Zfr	Zinc finger RNA-binding protein	MOUSE	54	53.7	746.75	-0.056	-0.194	-0.072	-0.214	0.033	0.067	0.112	-0.092	0.300038	0.999706
H7BX46	H7BX46|G3X932	Arhgap39	Rho GTPase-activating protein 39	MOUSE	58	64.6	746.41	-0.017	-0.136	0	-0.077	-0.001	0.019	0.001	0.046	0.894229	0.999706
E9PV41	E9PV41|O08808|E9PXV7|F6XC54|D3Z074	Diaph1	Protein diaphanous homolog 1	MOUSE	54	48.6	746.14	-0.023	-0.082	-0.028	-0.007	0.051	-0.026	-0.037	0.086	0.594859	0.999706
Q91YP2	Q91YP2|A0A286YD12|A0A286YD77	Nln	Neurolysin, mitochondrial	MOUSE	48	70.8	744.83	-0.09	0.039	0.091	0.111	0.026	-0.125	-0.24	-0.007	0.810874	0.999706
Q8CGY8	Q8CGY8	Ogt	UDP-N-acetylglucosamine--peptide N-acetylglucosaminyltransferase 110 kDa subunit	MOUSE	45	56	744.67	-0.047	0.03	0.032	0.147	0.078	-0.042	-0.099	0.124	0.304105	0.999706
Q8BYI9	Q8BYI9|A0A0A6YWD9	Tnr	Tenascin-R	MOUSE	50	43.8	744.36	-0.184	-0.329	-0.196	-0.133	0.155	0.185	0.178	0.214	0.938667	0.999706
Q91VR5	Q91VR5|A0A1Y7VM48	Ddx1	ATP-dependent RNA helicase DDX1	MOUSE	50	74	744.21	-0.143	0.07	-0.186	-0.048	0.021	-0.017	-0.091	-0.067	0.322426	0.999706
H7BX08	H7BX08|A0A0A6YY67|Q8C1B1|A0A0A6YXV8	Camsap2	Calmodulin-regulated spectrin-associated protein 2	MOUSE	57	45.6	742.14	-0.076	-0.272	-0.237	-0.345	0.128	0.124	0.053	-0.131	0.203683	0.999706
Q61553	Q61553|A0A0G2JDU7|F7BDR1	Fscn1	Fascin	MOUSE	45	82.3	739.16	-0.109	-0.049	0.077	0.119	0.038	-0.096	-0.152	0.095	0.424514	0.999706
P42932	P42932|H3BL49|H3BJB6|H3BKG2|H3BLL1|H3BKR8	Cct8	T-complex protein 1 subunit theta	MOUSE	48	82.1	736.36	-0.017	-0.1	-0.006	0.014	0.022	0.011	-0.03	0.063	0.75372	0.999706
Q76MZ3	Q76MZ3|G3UXQ1|H3BK50	Ppp2r1a	Serine/threonine-protein phosphatase 2A 65 kDa regulatory subunit A alpha isoform	MOUSE	45	81.4	736.34	-0.077	-0.047	0.103	0.075	0.024	-0.065	-0.077	0.048	0.656415	0.999706
Q7TNP2	Q7TNP2|G3UWS4|H3BKU1|Q3TTF6|H3BLQ0|H3BLE7|H3BIV7|H3BJ83	Ppp2r1b	Serine/threonine-protein phosphatase 2A 65 kDa regulatory subunit A beta isoform	MOUSE	24	49.4	336.2	0.028	0.332	0.205	0.329	-0.005	-0.072	-0.076	0.105	0.341606	0.999706
G3UWL2	G3UWL2	Ppp2r1a	Serine/threonine-protein phosphatase 2A 65 kDa regulatory subunit A alpha isoform (Fragment)	MOUSE	10	87.4	189.86	0.875	-0.396	-0.791	-0.341	0.07	0.824	1.82	0.604	0.920859	0.999706
Q6PB44	Q6PB44|A0A0G2JEW5	Ptpn23	Tyrosine-protein phosphatase non-receptor type 23	MOUSE	56	38	734.17	-0.008	-0.153	-0.045	-0.01	0.049	0.06	0.079	0.088	0.805116	0.999706
E9QKE4	E9QKE4|A0A0A6YWM5|Q8BMG7	Rab3gap2	Rab3 GTPase-activating protein non-catalytic subunit	MOUSE	54	47.3	733.48	-0.019	-0.054	-0.017	-0.062	0.043	0.078	0.107	0.075	0.956581	0.999706
Q2PZL6	Q2PZL6	Fat4	Protocadherin Fat 4	MOUSE	63	15.4	732.81	0.065	0.006	-0.013	-0.08	0.032	0.063	0.029	0.023	0.75474	0.999706
Q5UE59	Q5UE59|A0A5F8MPZ2|Q8CD76|E9Q7C9|Q7TNF4|O88447|F6UYN4	Klc1	Kinesin light chain	MOUSE	44	74.7	732.12	0.016	-0.151	-0.054	-0.073	0.005	0.061	0.026	0.054	0.954868	0.999706
Q91YS4	Q91YS4|D3YXZ3|O88448|D3Z5Y7	Klc2	Kinesin light chain	MOUSE	41	74.1	615.14	0.102	-0.099	0.026	-0.107	0.008	0.082	0.156	-0.019	0.448281	0.999706
Q9DBS5	Q9DBS5	Klc4	Kinesin light chain 4	MOUSE	27	47.1	391.38	0.082	0.003	-0.022	0.092	-0.091	-0.022	0.086	0.05	0.812137	0.999706
Q91W40	Q91W40|D3Z710	Klc3	Kinesin light chain 3	MOUSE	4	7.8	51	0.655	-0.2	-0.241	-0.173	-0.174	0.458	0.802	0.296	0.928982	0.999706
Q9WU78	Q9WU78	Pdcd6ip	Programmed cell death 6-interacting protein	MOUSE	54	60.1	731.42	0.02	-0.088	-0.01	0.038	0.037	-0.003	0.015	0.097	0.46811	0.999706
Q00PI9	Q00PI9|A0A494BAL6	Hnrnpul2	Heterogeneous nuclear ribonucleoprotein U-like protein 2	MOUSE	53	67.9	731.27	-0.058	0.001	-0.075	-0.2	0.02	0.045	-0.007	-0.091	0.152045	0.999706
Q9R0M0	Q9R0M0|F7BHW1|O35161	Celsr2	Cadherin EGF LAG seven-pass G-type receptor 2	MOUSE	60	23.2	731.27	0.09	-0.032	0.041	-0.048	-0.072	-0.003	0.072	0.01	0.835709	0.999706
Q80TL7	Q80TL7|B9EKJ3|A0A1W2P878	Mon2	Protein MON2 homolog	MOUSE	58	37.9	731.16	-0.029	0.037	-0.145	-0.04	0.008	0.043	0.064	0.061	0.860828	0.999706
G3X956	G3X956|Q920B9	Supt16	FACT complex subunit	MOUSE	53	52.5	731.05	0.049	0.128	0.077	0.107	0.044	0.001	0.022	0.035	0.721879	0.999706
Q9Z110	Q9Z110|D3Z0B4|H3BKK0|H3BLE8|H3BKJ8	Aldh18a1	Delta-1-pyrroline-5-carboxylate synthase	MOUSE	48	70	730.28	-0.115	0.621	0.099	0.205	-0.048	-0.183	-0.264	-0.155	0.615679	0.999706
Q8BPM0	Q8BPM0	Daam1	Disheveled-associated activator of morphogenesis 1	MOUSE	55	49.3	730.08	0.122	0.024	-0.006	-0.08	-0.051	-0.04	-0.091	-0.163	0.267708	0.999706
Q80U19	Q80U19	Daam2	Disheveled-associated activator of morphogenesis 2	MOUSE	9	6.9	85.86	-0.062	-0.034	-0.06	0.149	0.221	0.089	0.105	0.136	0.51525	0.999706
Q60864	Q60864|Q64345|E9PV48	Stip1	Stress-induced-phosphoprotein 1	MOUSE	54	80.8	729.84	-0.02	-0.185	-0.104	-0.092	0.04	0.049	0.026	0.071	0.834723	0.999706
V9GX34	V9GX34|A0A1Y7VP35	Csmd2	CUB and Sushi multiple domains 2	MOUSE	55	20.4	728.46	-0.063	-0.081	-0.055	-0.187	0.094	0.106	0.091	0.07	0.860828	0.999706
Q99KK7	Q99KK7|A0A494BBC1|A0A494BA16|A0A494BBB3|A0A494B918	Dpp3	Dipeptidyl peptidase 3	MOUSE	47	75.6	726.72	-0.027	-0.157	-0.049	0	-0.004	0.008	-0.042	0.078	0.544711	0.999706
Q9ESN6	Q9ESN6|E9QKC6|Q3UHH4|D3YY69|D3YZJ0|D3YTN5|D3YY12	Trim2	Tripartite motif-containing protein 2	MOUSE	44	79.1	726.38	0.031	-0.149	-0.005	0.015	0.034	0.037	0.086	0.135	0.490558	0.999706
Q9R1R2	Q9R1R2|Q3TDT0|D3Z7V9	Trim3	Tripartite motif-containing protein 3	MOUSE	41	69.6	690.22	-0.015	-0.074	0.038	0.032	0.015	0.026	0.03	0.125	0.547895	0.999706
G3X8Y3	G3X8Y3|Q80UM3|A0A0A6YW80|A0A0A6YX86|Q9DBB4|A0A0A6YXF4|E9PZ53	Naa15	N-alpha-acetyltransferase 15, NatA auxiliary subunit	MOUSE	56	65.3	726.03	-0.067	0.063	-0.2	-0.017	0.043	0.12	0.026	0.051	0.31079	0.999706
Q3UPL0	Q3UPL0|S4R2A9|S4R192|S4R256|S4R1T5|S4R1Y8	Sec31a	Protein transport protein Sec31A	MOUSE	51	49.4	725.47	-0.123	0.004	-0.125	0.05	0.105	0.072	0.005	0.114	0.468164	0.999706
A0A1L1SV73	A0A1L1SV73|Q8BY87	Usp47	Ubiquitin carboxyl-terminal hydrolase 47	MOUSE	56	45.8	724.9	-0.055	-0.003	0.008	-0.025	-0.032	-0.051	-0.055	-0.03	0.938311	0.999706
P26040	P26040	Ezr	Ezrin	MOUSE	52	68.6	724.7	0.122	0.029	0.197	0.212	-0.01	-0.14	-0.115	0.035	0.403892	0.999706
P26041	P26041	Msn	Moesin	MOUSE	50	77.2	723.96	-0.036	-0.102	0.171	0.126	0.109	-0.028	0.039	0.109	0.227501	0.999706
P26043	P26043|A0A5F8MPB9|Q7TSG6	Rdx	Radixin	MOUSE	49	63.9	656.67	0.094	-0.093	0.079	0.05	0.008	0.043	0.032	0.063	0.684487	0.999706
Q6IR34	Q6IR34|F6SX81|A2AIV3|A2AEL5|A2AIV4	Gpsm1	G-protein-signaling modulator 1	MOUSE	44	76.9	724.57	-0.028	-0.089	-0.027	0.003	0.038	0.04	-0.027	0.05	0.901714	0.999706
Q8VDU0	Q8VDU0	Gpsm2	G-protein-signaling modulator 2	MOUSE	8	10	92.64	-0.15	0.006	-0.046	0.366	0.178	-0.193	0.132	0.023	0.532787	0.999706
Q9D0R2	Q9D0R2|A0A2I3BPK8	Tars1	Threonine--tRNA ligase 1, cytoplasmic	MOUSE	52	67.7	724.26	0.01	-0.018	-0.008	0.042	-0.033	0.011	-0.054	0.016	0.880105	0.999706
Q8BLY2	Q8BLY2	Tars3	Threonine--tRNA ligase 2, cytoplasmic	MOUSE	39	55	520.58	-0.099	-0.09	-0.128	-0.094	0.059	0.075	-0.085	-0.104	0.433735	0.999706
Q3UVX5	Q3UVX5|E9QMC2	Grm5	Metabotropic glutamate receptor 5	MOUSE	51	47.1	724.07	-0.058	-0.024	-0.03	-0.059	0.012	0.021	0.004	-0.004	0.967968	0.999706
P97772	P97772	Grm1	Metabotropic glutamate receptor 1	MOUSE	21	19.3	274.22	0.031	0.113	0.069	0.112	0.006	0.043	-0.012	0.106	0.354563	0.999706
Q9EPR5	Q9EPR5|D3YYF4|Q8BI74	Sorcs2	VPS10 domain-containing receptor SorCS2	MOUSE	51	48.7	722.73	-0.136	-0.001	0.057	-0.025	0.123	-0.017	-0.026	-0.076	0.961249	0.999706
Q68FF6	Q68FF6|Q5F258	Git1	ARF GTPase-activating protein GIT1	MOUSE	51	69.7	720.84	0.016	-0.156	-0.017	-0.059	0.035	0.011	-0.043	0.056	0.708328	0.999706
E9PVA6	E9PVA6|Q9JLQ2|J3QK07|Q80XR8|F7BIK4|F6U8T2|D3Z409|F6SLJ2	Git2	ARF GTPase-activating protein GIT2	MOUSE	26	38	357.93	0.098	-0.291	-0.022	-0.245	-0.027	0.068	0.123	0.04	0.587911	0.999706
D3Z1I2	D3Z1I2	Git2	ARF GTPase-activating protein GIT2	MOUSE	24	40.3	330.4	0.408	0.168	0.386	0.396	0.117	-0.159	0.229	0.083	0.0400498	0.999706
F6WV69	F6WV69	Git2	ARF GTPase-activating protein GIT2 (Fragment)	MOUSE	8	41.1	133.64	-0.025	-0.273	0.026	-0.069	0.053	0.129	-0.128	0.047	0.945093	0.999706
A0A571BG95	A0A571BG95|E9PUE7|H3BKV6|H3BJY3|H3BKT3|H3BL84	Abr	Active breakpoint cluster region-related protein	MOUSE	49	50.4	720.36	-0.043	-0.173	-0.12	-0.075	0.098	0.115	0.063	0.147	0.905323	0.999706
Q5SSL4	Q5SSL4	Abr	Active breakpoint cluster region-related protein	MOUSE	46	66.2	686.57	0.046	-0.23	-0.095	-0.101	0.292	0.203	0.187	0.211	0.545894	0.999706
Q6PAJ1	Q6PAJ1|A0A571BEM4|A0A1W2P6I7|A0A1W2P6J3	Bcr	Breakpoint cluster region protein	MOUSE	45	41.4	599.19	0.077	-0.067	-0.002	0.045	0.015	0.062	0.057	0.093	0.773639	0.999706
B1AU75	B1AU75|Q99MD9|B1AU76	Nasp	Nuclear autoantigenic sperm protein	MOUSE	45	80	720.24	0.027	-0.034	-0.018	0.058	-0.133	-0.094	-0.078	0.084	0.347248	0.999706
Q62108	Q62108|A0A338P6I6|A0A338P6E5|G3UZL5|A0A338P6H5|A0A338P6L4|B1AR31|A0A338P7H1|A0A338P713|E9Q3Z8|J3QMR8|F6TPQ6|A0A338P746|J3KMS4	Dlg4	Disks large homolog 4	MOUSE	48	69.1	718.65	-0.033	-0.088	0.011	-0.038	0.008	0.009	-0.008	0.026	0.953352	0.999706
D3Z3B8	D3Z3B8	Dlg1	Disks large homolog 1	MOUSE	35	45.4	483.03	-0.291	-0.326	-0.172	-0.174	0.108	-0.057	-0.337	-0.196	0.367533	0.999706
Q811D0	Q811D0|H7BWY4	Dlg1	Disks large homolog 1	MOUSE	35	40.9	479.37	0.005	-0.171	0.025	-0.097	0.232	-0.079	0.151	0.407	0.275278	0.999706
P63318	P63318|Q2NKI4|A0A0N4SWF4	Prkcg	Protein kinase C gamma type	MOUSE	50	63.9	717.85	-0.009	-0.092	0.043	0.131	0.081	0.067	0.025	0.162	0.248694	0.999706
P68404	P68404	Prkcb	Protein kinase C beta type	MOUSE	48	65.2	697.03	-0.073	-0.144	-0.089	0.023	0.089	0.057	0.102	0.211	0.399929	0.999706
Q4VA93	Q4VA93|P20444|Q3TQ39	Prkca	Protein kinase C	MOUSE	47	65.6	643.87	-0.093	-0.229	-0.097	0.015	0.073	0.07	0.061	0.162	0.477112	0.999706
A0A1W2P832	A0A1W2P832|A0A2I3BRX9|A0A1W2P712|Q6GYP7|A0A1W2P7P2|A0A1W2P6Q0|A0A1W2P7Y4	Ralgapa1	Ral GTPase-activating protein subunit alpha-1	MOUSE	53	29.2	716.75	-0.04	-0.145	-0.096	-0.068	0.055	0.073	0.019	-0.056	0.854009	0.999706
A0A2I3BPN8	A0A2I3BPN8|A0A0A0MQD7|A3KGS3|F7CGP0|F7AI67	Ralgapa2	Ral GTPase-activating protein subunit alpha-2	MOUSE	18	9.4	202.46	-0.008	-0.124	-0.15	-0.178	0.051	0.15	0.106	-0.105	0.438622	0.999706
Q5F2E8	Q5F2E8	Taok1	Serine/threonine-protein kinase TAO1	MOUSE	56	50.7	716.47	0.032	-0.055	-0.05	0.01	0.081	0.042	0.014	0.105	0.595332	0.999706
Q6ZQ29	Q6ZQ29	Taok2	Serine/threonine-protein kinase TAO2	MOUSE	36	26	449.69	0.125	-0.094	0.008	0.011	0.013	0.005	0.125	-0.028	0.535283	0.999706
Q8BYC6	Q8BYC6|Q3V3K3|A0A0R4J1T3	Taok3	Serine/threonine-protein kinase TAO3	MOUSE	29	33.1	344.64	0.015	-0.091	-0.037	-0.078	-0.003	0.023	0.055	-0.041	0.769746	0.999706
A0A1L1SSV8	A0A1L1SSV8	Taok2	Serine/threonine-protein kinase TAO2 (Fragment)	MOUSE	17	47.6	221.55	-0.031	0.057	0.083	0.027	0.041	-0.031	-0.042	0.032	0.990159	0.999706
F6RXB5	F6RXB5	Taok3	Serine/threonine-protein kinase TAO3 (Fragment)	MOUSE	3	15.8	42.44	0.459	-0.373	-0.521	-0.301	-0.042	0.425	0.701	0.058	0.927564	0.999706
Q62318	Q62318	Trim28	Transcription intermediary factor 1-beta	MOUSE	45	82.2	714.37	-0.024	0.21	0.085	0.179	-0.044	-0.087	-0.097	-0.023	0.716246	0.999706
A2ACM0	A2ACM0|Q8K4Q0|E9PXZ5|F7CN67|F7BQS0|F6U5L3|F7B6I3	Rptor	Regulatory-associated protein of mTOR	MOUSE	50	49.6	713.34	0.014	0.006	0.027	0.04	0.061	-0.017	0.023	0.062	0.80766	0.999706
Q60875	Q60875|H3BKH9|H3BJX8|H3BJ40|H3BJ45|H3BJU7|H3BL15|H3BJ59|H3BLF9|H3BIX8|H3BLJ1|H3BJ48|H3BJM4	Arhgef2	Rho guanine nucleotide exchange factor 2	MOUSE	51	57.7	713.16	0.092	0.013	0.016	-0.062	-0.053	0.006	-0.021	-0.037	0.855888	0.999706
D3YU22	D3YU22|Q3UH68|A0A571BG24|D3Z589|A0A5F8MPN3|D3YU59|D3YV55|F6X3N8|D6RHT2|F6W1Y9|A0A0J9YUH0	Limch1	LIM and calponin homology domains-containing protein 1	MOUSE	53	58.2	712.27	0.036	-0.156	-0.01	-0.034	0.068	0.144	0.192	0.096	0.793365	0.999706
O08759	O08759|A0A0J9YUK0|A0A0J9YUY4|A0A0J9YVG1|A0A140LHS2|A0A140LI50|A0A0J9YTX6|A0A0J9YUF2	Ube3a	Ubiquitin-protein ligase E3A	MOUSE	50	61.8	711.52	-0.084	-0.142	-0.176	-0.093	0.084	0.036	-0.004	0.055	0.674864	0.999706
Q8BJ71	Q8BJ71|A0A1D5RLQ0|A0A1D5RM86	Nup93	Nuclear pore complex protein Nup93	MOUSE	52	68.7	710.83	0.034	0.049	-0.008	-0.002	-0.046	0.001	-0.013	0.011	0.975612	0.999706
E0CZ72	E0CZ72|P28740|F8VQ42|Q922S8|Q3TTL2|Q8C0N1	Kif2a	Kinesin-like protein	MOUSE	48	72.5	709.29	0.069	-0.092	0.004	-0.034	0.032	0.023	-0.02	0.034	0.778986	0.999706
Q9Z1Z0	Q9Z1Z0|A0A0J9YUG0	Uso1	General vesicular transport factor p115	MOUSE	47	52.4	709.18	-0.033	-0.249	-0.179	-0.267	0.065	0.096	0.016	-0.067	0.366902	0.999706
P49025	P49025|E9QL53|D3YU89|F6SBR5|D3Z1U0	Cit	Citron Rho-interacting kinase	MOUSE	64	28.5	708.3	-0.099	-0.226	-0.109	-0.118	0.131	0.181	0.192	0.224	0.956998	0.999706
Q60790	Q60790	Rasa3	Ras GTPase-activating protein 3	MOUSE	50	68.7	707.99	-0.015	0.052	0.092	0.013	-0.024	-0.052	-0.025	0	0.942017	0.999706
Q61598	Q61598|A0A1Y7VL99|A0A1Y7VLG4	Gdi2	Rab GDP dissociation inhibitor beta	MOUSE	40	90.3	691.64	-0.014	-0.142	0.065	0.078	0.074	0.029	0.018	0.155	0.298134	0.999706
P50396	P50396|B7FAU8|D6RI86	Gdi1	Rab GDP dissociation inhibitor alpha	MOUSE	39	92.1	707.17	-0.118	-0.107	0.155	0.084	0.16	0	0.043	0.179	0.387609	0.999706
Q7TQD7	Q7TQD7|P46735|E9Q580|E9QNH6|D3YV80|O88329	Myo1b	Myo1b protein	MOUSE	55	49.1	706.82	-0.023	0.024	-0.006	-0.079	0.042	0.039	-0.01	-0.097	0.379519	0.999706
P27612	P27612|F7D1R5	Plaa	Phospholipase A-2-activating protein	MOUSE	44	65.6	706.75	-0.041	-0.134	-0.028	-0.024	0.034	0.083	0.025	0.052	0.986867	0.999706
O35954	O35954|D3YXW5|A0A494B9B7|A0A494BBA1	Pitpnm1	Membrane-associated phosphatidylinositol transfer protein 1	MOUSE	47	51.5	706.11	-0.109	-0.261	-0.07	-0.13	0.113	0.165	0.06	0.068	0.983149	0.999706
Q8CI71	Q8CI71	Vps50	Syndetin	MOUSE	50	56.4	705.2	-0.009	-0.032	-0.029	-0.01	-0.006	0.036	0.052	0.046	0.992144	0.999706
E9Q3M9	E9Q3M9|F7B0R9|E0CXB3	Cracdl	Capping protein-inhibiting regulator of actin-like	MOUSE	55	54.5	704.91	-0.115	-0.37	-0.334	-0.488	0.079	0.095	0.093	-0.13	0.214602	0.999706
Q8K0U4	Q8K0U4|A0A494BAN0|A0A494B917|A0A494BAN9|Q9CZJ2	Hspa12a	Heat shock 70 kDa protein 12A	MOUSE	46	74.3	704.77	-0.018	-0.097	-0.08	0.036	0.026	0.047	0.014	0.099	0.584396	0.999706
Q9Z1L5	Q9Z1L5|A0A286YCT5|A0A286YCF6|A0A286YCK6|A0A286YE06	Cacna2d3	Voltage-dependent calcium channel subunit alpha-2/delta-3	MOUSE	46	52.3	704.45	0.038	0.032	0.044	0.018	-0.045	-0.106	-0.07	-0.057	0.971638	0.999706
Q3UJB0	Q3UJB0|A0A494B9S9	Sf3b2	Splicing factor 3b, subunit 2	MOUSE	50	56.4	703.67	-0.025	-0.198	-0.064	-0.148	0.015	0.036	0.045	-0.068	0.495995	0.999706
Q03137	Q03137|A0A087WQW6|A0A087WRH4	Epha4	Ephrin type-A receptor 4	MOUSE	46	56.7	702.94	0.001	-0.059	-0.013	-0.239	-0.003	0.023	-0.022	-0.17	0.0476843	0.999706
E9PUQ0	E9PUQ0|E9PUP9|E9PUQ2|Q60629|E9PUQ4|Q6PFV6	Epha5	Receptor protein-tyrosine kinase	MOUSE	41	46.6	562.78	0.136	0.138	0.123	0.13	-0.048	-0.048	-0.165	-0.031	0.870633	0.999706
P54763	P54763|F6Q4H2	Ephb2	Ephrin type-B receptor 2	MOUSE	35	45.2	550.81	0.107	0.092	0.138	0.066	-0.006	-0.017	-0.009	0.01	0.835659	0.999706
P54754	P54754|E0CYA3	Ephb3	Ephrin type-B receptor 3	MOUSE	28	34.3	345.82	-0.026	-0.099	-0.041	-0.146	0.075	0.137	0.077	-0.099	0.349238	0.999706
Q8BRB1	Q8BRB1|B7ZNN5|P29319|Q8C9K6|A0A338P6A7	Epha3	Receptor protein-tyrosine kinase	MOUSE	26	31.4	337.17	0.168	0.068	0.068	-0.076	-0.001	-0.052	-0.105	-0.176	0.168726	0.999706
Q61772	Q61772|A2BDQ4	Epha7	Ephrin type-A receptor 7	MOUSE	23	26.3	303.87	0.13	0.037	0.094	-0.139	-0.066	-0.045	-0.07	-0.168	0.201728	0.999706
G1K381	G1K381|Q62413	Epha6	Receptor protein-tyrosine kinase	MOUSE	23	20.7	292.53	0.072	0.052	0.079	-0.288	0.007	0.028	0.121	-0.169	0.0148831	0.999706
Q8CBF3	Q8CBF3|Q8CA63	Ephb1	Ephrin type-B receptor 1	MOUSE	21	23.3	269.25	0.174	0.143	0.185	0.136	-0.154	-0.176	-0.141	-0.084	0.993149	0.999706
Q03145	Q03145	Epha2	Ephrin type-A receptor 2	MOUSE	6	6.5	58.39	-0.538	-0.623	-0.478	-0.206	0.627	0.344	0.106	0.551	0.731379	0.999706
O09127	O09127	Epha8	Ephrin type-A receptor 8	MOUSE	4	5.1	33.13	0.107	0.089	0.194	0.058	0.083	0.04	0.011	-0.148	0.329177	0.999706
Q3URD3	Q3URD3|H7BX64|D3Z7V3|F8WIH0|F6YCM8|F6UV57|F6WY34	Slmap	Sarcolemmal membrane-associated protein	MOUSE	55	60.3	702.27	0.068	-0.018	-0.009	-0.158	-0.022	-0.061	-0.049	-0.071	0.360635	0.999706
A2AEW8	A2AEW8|Q8VD04|A2AEW9|A2AEW5	Gripap1	GRIP1-associated protein 1	MOUSE	51	71.3	701.11	-0.01	-0.212	-0.144	-0.176	0.006	0.075	0.07	0.003	0.807652	0.999706
A2AEW6	A2AEW6	Gripap1	GRIP1-associated protein 1 (Fragment)	MOUSE	27	66.9	375.03	0.076	-0.169	0.046	-0.175	-0.04	0.054	0.002	0.136	0.950496	0.999706
P11983	P11983|F2Z483|A0A3B2WDE2	Tcp1	T-complex protein 1 subunit alpha	MOUSE	42	85.7	700.46	-0.101	-0.051	0.03	0.052	0.045	-0.055	-0.111	0.088	0.578497	0.999706
Q6A0A9	Q6A0A9	FAM120A	Constitutive coactivator of PPAR-gamma-like protein 1	MOUSE	48	53.4	700.09	0	-0.122	-0.113	-0.183	-0.042	0.012	0.014	-0.136	0.261808	0.999706
Q8C3F2	Q8C3F2	Fam120c	Constitutive coactivator of PPAR-gamma-like protein 2	MOUSE	42	47.2	598.41	-0.064	-0.048	-0.097	-0.102	0.005	0.018	0.011	-0.064	0.657235	0.999706
Q9JIX8	Q9JIX8|F6RJ39|B8JJ91|B8JJ92|B8JJ89|F6Q8C0|B8JJ90	Acin1	Apoptotic chromatin condensation inducer in the nucleus	MOUSE	57	38.9	699.78	-0.004	-0.16	-0.044	-0.133	-0.038	0.056	0.088	-0.042	0.667739	0.999706
Q52KR6	Q52KR6	Acin1	Acin1 protein	MOUSE	34	54.8	404.88	-0.304	-0.007	0.051	0.003	-0.038	-0.173	-0.564	-0.087	0.619605	0.999706
P51660	P51660	Hsd17b4	Peroxisomal multifunctional enzyme type 2	MOUSE	45	72.2	698.09	-0.051	0.096	0.197	0.197	-0.075	-0.211	-0.214	-0.06	0.807755	0.999706
P80318	P80318|E9Q133|Q3U0I3|F6Q609|F6ZVG8	Cct3	T-complex protein 1 subunit gamma	MOUSE	46	78.5	697.57	-0.005	-0.071	-0.006	0.032	0.01	-0.033	-0.074	0.054	0.557916	0.999706
Q05D44	Q05D44	Eif5b	Eukaryotic translation initiation factor 5B	MOUSE	52	46.2	697.54	-0.095	-0.038	-0.206	-0.138	-0.014	0.034	-0.034	-0.067	0.287789	0.999706
Q8K411	Q8K411	Pitrm1	Presequence protease, mitochondrial	MOUSE	48	58	697.2	-0.077	0.374	0.104	0.244	-0.061	-0.195	-0.328	-0.127	0.722393	0.999706
A0A5F8MPP1	A0A5F8MPP1|E9Q5L4|E9Q3Y7|F7BFN2	Cracd	RIKEN cDNA C530008M17 gene	MOUSE	57	43.2	695.98	0.038	-0.249	-0.107	-0.265	0.091	0.114	0.126	-0.028	0.386478	0.999706
Q5PR69	Q5PR69	Crad	Capping protein inhibiting regulator of actin dynamics	MOUSE	50	45.9	605.51	0.151	-0.337	0.173	-0.125	0.213	0.08	0.369	0.006	0.0389389	0.999706
P80313	P80313|A0A0N4SV00|A0A0N4SUI8|A0A0N4SV22	Cct7	T-complex protein 1 subunit eta	MOUSE	41	83.4	695.96	-0.112	-0.097	-0.001	0.016	0.103	-0.023	-0.131	0.127	0.584779	0.999706
E9QB02	E9QB02|Q68FL6|F6W0G8	Mars1	Methionine--tRNA ligase, cytoplasmic	MOUSE	49	53.2	695.66	-0.001	0.036	-0.108	-0.094	0.003	0.042	-0.054	-0.081	0.205389	0.999706
Q9D4H1	Q9D4H1	Exoc2	Exocyst complex component 2	MOUSE	50	59.6	695.62	-0.019	-0.145	-0.11	-0.068	0.049	0.061	0.002	0.017	0.839164	0.999706
Q8VIJ6	Q8VIJ6	Sfpq	Splicing factor, proline- and glutamine-rich	MOUSE	49	60.3	695.26	0.045	-0.045	-0.027	-0.075	-0.06	-0.018	0.002	-0.057	0.813823	0.999706
B2RSU7	B2RSU7|E9PWI6|Q8CHG3|E0CYI9|F6UT01|E0CY89	Gcc2	GRIP and coiled-coil domain containing 2	MOUSE	54	32.5	695.07	0.146	-0.108	-0.033	-0.078	-0.077	-0.021	0.023	-0.091	0.640036	0.999706
Q9QXS6	Q9QXS6|F7CPL2	Dbn1	Drebrin	MOUSE	44	66.7	693.8	-0.042	-0.187	-0.058	-0.219	0.087	0.081	0.042	-0.002	0.557661	0.999706
A0A0R4J1E3	A0A0R4J1E3	Dbn1	Drebrin	MOUSE	39	60	616.91	0.031	-0.199	-0.077	-0.44	0.103	0.236	0.183	-0.039	0.219697	0.999706
O08529	O08529	Capn2	Calpain-2 catalytic subunit	MOUSE	42	72.5	693.23	-0.005	-0.06	0.012	0.039	-0.007	0.015	-0.029	0.12	0.542248	0.999706
Q6NVE8	Q6NVE8	Wdr44	WD repeat-containing protein 44	MOUSE	48	66	691.64	0.057	-0.109	0.008	-0.002	0.003	0.003	-0.008	-0.053	0.769033	0.999706
Q921K2	Q921K2|P11103|A0A0A6YY63|A0A0A6YX03	Parp1	Poly [ADP-ribose] polymerase	MOUSE	48	47.8	691.42	-0.066	0.078	-0.003	0.005	-0.091	-0.134	-0.212	-0.121	0.644599	0.999706
Q91WC3	Q91WC3|Q5F2C5|Q8C028|B0QZJ6|B1ARG5|F6WYN6	Acsl6	Long-chain-fatty-acid--CoA ligase 6	MOUSE	44	71	691.09	-0.043	0.04	-0.043	-0.022	-0.04	-0.019	-0.061	-0.018	0.761232	0.999706
Q8R1X1	Q8R1X1|Q5ICG5|Q8BYJ0|E9Q7Y2	Acsl6	Acyl-CoA synthetase long-chain family member 6	MOUSE	44	68	686.34	0.251	0.094	0.096	0.071	-0.013	-0.022	0.463	0.638	0.347353	0.999706
Q8CAA7	Q8CAA7|E0CX81	Pgm2l1	Glucose 1,6-bisphosphate synthase	MOUSE	46	70.3	690.94	-0.027	-0.214	-0.119	-0.084	0.11	0.107	0.097	0.073	0.883483	0.999706
P80314	P80314|A0A1W2P7B7|A0A1W2P6Q3|A0A1W2P8B6|A0A1W2P828|A0A1W2P871	Cct2	T-complex protein 1 subunit beta	MOUSE	42	88.9	690.72	-0.027	-0.086	0.017	0.037	0.051	0.007	-0.045	0.124	0.514892	0.999706
Q9D0I9	Q9D0I9	Rars1	Arginine--tRNA ligase, cytoplasmic	MOUSE	48	70.3	690.36	0.002	-0.044	-0.076	-0.069	0.037	0.058	-0.008	-0.053	0.634386	0.999706
Q6ZPQ6	Q6ZPQ6|E9PYJ7|A0A0G2JFQ8|E0CXR4	Pitpnm2	Membrane-associated phosphatidylinositol transfer protein 2	MOUSE	45	42.6	689.47	-0.05	-0.211	-0.065	-0.063	0.021	0.047	-0.007	0.099	0.758455	0.999706
Q3UHB2	Q3UHB2|A0A2I3BPP1|Q7TT21|A0A2I3BRT5|Q61037|A0A2I3BPE9|Q3TQ10|A0A2I3BPR7	Tsc2	Tuberin	MOUSE	51	36.6	688.74	0.087	-0.03	0.01	0.017	-0.054	-0.013	0.046	0.046	0.923914	0.999706
Q6DFZ1	Q6DFZ1|H3BLN1|A0A668KLD0|H3BIX5	Gbf1	Golgi-specific brefeldin A-resistance factor 1	MOUSE	53	33.7	688.5	-0.038	0.081	-0.244	-0.112	0.046	0.057	0.063	-0.082	0.411652	0.999706
Q03265	Q03265|D3Z6F5|D6RJ16	Atp5f1a	ATP synthase subunit alpha, mitochondrial	MOUSE	46	81.1	687.1	-0.07	0.193	0.124	0.221	-0.005	-0.133	-0.21	0.041	0.611698	0.999706
Q8VD37	Q8VD37|F6VMS8	Sgip1	SH3-containing GRB2-like protein 3-interacting protein 1	MOUSE	45	71.9	686.49	-0.055	-0.137	-0.034	-0.102	0.039	0.031	0.005	0.056	0.93735	0.999706
F7CPX0	F7CPX0	Sgip1	Endophilin-3-interacting protein (Fragment)	MOUSE	26	56.8	389.39	-0.204	-0.225	-0.053	-0.167	-0.031	-0.103	-0.155	-0.036	0.346533	0.999706
Q9QZE5	Q9QZE5|Q7TNQ1	Copg1	Coatomer subunit gamma-1	MOUSE	46	68.7	685.85	0.013	0.006	-0.072	0.02	0.035	0.048	0.017	0.001	0.885946	0.999706
Q9QXK3	Q9QXK3	Copg2	Coatomer subunit gamma-2	MOUSE	37	58.2	559.97	0.005	0.022	-0.064	-0.014	0.077	0.081	0.04	0.004	0.754959	0.999706
Q91ZA3	Q91ZA3|H3BL62|H3BK61|D3YWM4|H3BJR0|D3YZC0|H3BKW6	Pcca	Propionyl-CoA carboxylase alpha chain, mitochondrial	MOUSE	47	71.9	685.79	-0.119	0.088	0.008	0.087	-0.031	-0.072	-0.144	-0.017	0.601778	0.999706
Q9QXY6	Q9QXY6	Ehd3	EH domain-containing protein 3	MOUSE	44	83.5	683.91	-0.065	-0.206	-0.06	-0.011	0.067	0.072	-0.023	0.119	0.670716	0.999706
Q9WVK4	Q9WVK4|Q8BH64	Ehd1	EH domain-containing protein 1	MOUSE	43	85	650.34	0.008	-0.103	-0.004	0.035	0.018	-0.005	-0.005	0.072	0.549922	0.999706
Q9EQP2	Q9EQP2	Ehd4	EH domain-containing protein 4	MOUSE	21	38	257.06	-0.181	-0.165	-0.051	-0.005	-0.014	-0.033	-0.014	0.041	0.350998	0.999706
F2Z3U3	F2Z3U3|S4R2K5|F2Z3X7	Raph1	Ras association (RalGDS/AF-6) and pleckstrin homology domains 1	MOUSE	53	45.1	683.89	0.023	-0.167	-0.072	-0.123	0.013	0.05	-0.014	-0.006	0.744174	0.999706
G5E867	G5E867|F2Z4B7	Raph1	Ras association (RalGDS/AF-6) and pleckstrin homology domains 1	MOUSE	32	45	399.77	0.223	-0.177	0.09	-0.03	-0.023	-0.08	-0.092	-0.133	0.259312	0.999706
Q8R5A3	Q8R5A3	Apbb1ip	Amyloid beta A4 precursor protein-binding family B member 1-interacting protein	MOUSE	5	5.9	42.74	0.275	0.093	0.086	0.013	-0.328	0.157	0.117	0.036	0.852261	0.999706
P29341	P29341|Q9D4E6|F6ZAX1|A2A5N3	Pabpc1	Polyadenylate-binding protein 1	MOUSE	48	78.1	683.66	-0.064	-0.231	-0.134	-0.191	0.094	0.081	-0.007	-0.002	0.621311	0.999706
Q6PHQ9	Q6PHQ9|A3KFU5|A3KFU8|Q91YZ8|V9GXG3|G5E8X2|A0A0A6YWT2	Pabpc4	Polyadenylate-binding protein	MOUSE	37	53.7	504.79	-0.096	-0.288	-0.168	-0.292	0.128	0.146	0.014	-0.104	0.363732	0.999706
A0A2I3BR37	A0A2I3BR37	Pabpc1	Polyadenylate-binding protein 1 (Fragment)	MOUSE	8	80.9	112.94	0.835	-0.916	-1.171	-0.799	-0.049	0.557	1.11	0.218	0.886396	0.999706
Q8C7D3	Q8C7D3	Pabpc5	Poly(A)-binding protein, cytoplasmic 5	MOUSE	4	8.3	44.82	-0.094	0.091	-0.239	-0.058	-0.147	0.01	-0.092	-0.032	0.104256	0.999706
Q5DTL9	Q5DTL9	Slc4a10	Sodium-driven chloride bicarbonate exchanger	MOUSE	46	41	683.5	-0.131	-0.039	-0.098	-0.25	0.063	0.088	-0.006	-0.139	0.0980033	0.999706
E9Q8N8	E9Q8N8|A0A571BE55	Slc4a4	Anion exchange protein	MOUSE	36	41.2	540.33	-0.007	0.343	0.122	0.274	-0.123	-0.171	-0.068	0.017	0.546933	0.999706
A7E1Z5	A7E1Z5|D3Z7G8	Slc4a4	Anion exchange protein	MOUSE	32	37.9	483.76	-0.167	0.177	0.236	0.189	0.029	-0.041	0.006	0.035	0.461202	0.999706
Q8JZR6	Q8JZR6	Slc4a8	Electroneutral sodium bicarbonate exchanger 1	MOUSE	31	33.4	474.02	-0.038	-0.036	0.016	-0.107	0.041	0.052	0.001	0.021	0.919503	0.999706
J9RV59	J9RV59|F8VQC9|I1VGT4|A0A286YCS4|A0A286YCX2|D3Y272|Q8BTY2|E3UVT8|A0A286YD46|D3Y273|I1VGT5|H6WZF5|H6WZ45|J9RDH0|A0A286YDK8|I1VGT6|A0A286YCX8|E3UVT9|A0A286YDJ7|A0A286YDR1	Slc4a7	Anion exchange protein	MOUSE	28	27.2	410.25	-0.078	-0.068	0.056	-0.05	0.061	-0.007	0.056	-0.109	0.449204	0.999706
Q8CFI7	Q8CFI7	Polr2b	DNA-directed RNA polymerase II subunit RPB2	MOUSE	53	48.5	683.18	-0.06	0.139	0.083	0.025	-0.069	-0.033	-0.055	-0.048	0.605698	0.999706
Q62351	Q62351|Q8C872	Tfrc	Transferrin receptor protein 1	MOUSE	46	59.6	682.74	-0.071	0.037	-0.027	-0.222	0.101	0.101	-0.096	-0.197	0.0517939	0.999706
Q9EPU4	Q9EPU4|A0A2R8VK76|A0A2R8VI46|A0A2R8VK03	Cpsf1	Cleavage and polyadenylation specificity factor subunit 1	MOUSE	56	38	682.48	0.01	-0.036	0.01	-0.061	0.036	0.068	0.034	0.031	0.957974	0.999706
Q9JLV5	Q9JLV5|E9Q4T8|F6ZZK0|F6UY44|F6R0N8	Cul3	Cullin-3	MOUSE	48	63.4	682.28	0.033	-0.143	-0.042	-0.051	0.044	0.106	0.108	0.097	0.944127	0.999706
F8VQD1	F8VQD1|E9Q4Y5|D3Z1N4|Q8BSQ9|E9Q7L2|E9Q7L3|D3Z1W6|D3YYF2|F6THL5|D3Z3R4|D6RI94|D6RIL0|D3Z1M8|D3YYG4	Pbrm1	Protein polybromo-1	MOUSE	55	34.5	680.71	-0.024	0.14	-0.004	-0.06	-0.048	-0.041	-0.07	-0.156	0.322165	0.999706
Q8C2E7	Q8C2E7	Washc5	WASH complex subunit 5	MOUSE	50	52.8	679.6	0.089	-0.013	-0.135	0.012	-0.012	0.044	0.062	0.024	0.908418	0.999706
P09103	P09103|P05307|A6H7J6|E9Q8G8	P4hb	Protein disulfide-isomerase	MOUSE	47	80.3	679.22	-0.06	-0.277	-0.099	-0.146	0.076	0.082	0.016	0.055	0.792823	0.999706
Q9EPL8	Q9EPL8|A0A140LHD0	Ipo7	Importin-7	MOUSE	44	52.1	678.87	0.006	-0.086	-0.083	-0.059	0.034	0.073	0.044	0.066	0.983598	0.999706
Q7TMY7	Q7TMY7|A0A5F8MQ75|B2KGD7	Ipo8	Importin-8	MOUSE	6	6.5	82.91	0.172	0.516	0.14	0.368	-0.105	-0.15	-0.246	0.029	0.43775	0.999706
A0A6I8MX07	A0A6I8MX07|E9PUQ5|Q921M4|A0A6I8MWY5|Z4YJU8|A2AN46|A2AN48|A2AN45|A2AN42	Golga2	Golgin subfamily A member 2	MOUSE	46	51.8	678.65	-0.015	-0.25	-0.112	-0.333	0.052	0.078	0.055	-0.064	0.267391	0.999706
O54865	O54865|Q80YP4	Gucy1b1	Guanylate cyclase soluble subunit beta-1	MOUSE	45	75.1	678.63	-0.043	-0.175	-0.072	-0.101	0.045	0.052	0.031	0.061	0.906042	0.999706
E9Q6H8	E9Q6H8|A0A0N4SWD7|A0A0N4SUU0|A0A0N4SWF5|A0A0N4SUY3|A0A1L1SQF5|A0A0N4SW19|A0A0N4SUV0|A0A0N4SVR9|A0A0N4SWC0	Plekha5	Pleckstrin homology domain-containing, family A member 5	MOUSE	58	44.9	678.05	0.048	-0.117	-0.079	-0.169	0.002	0.002	0.037	-0.025	0.51252	0.999706
A0A0N4SV65	A0A0N4SV65	Plekha5	Pleckstrin homology domain-containing, family A member 5 (Fragment)	MOUSE	33	49.8	360.7	-0.277	0.358	0.36	0.608	-0.099	-0.498	-0.862	0.005	0.557386	0.999706
D3Z7P3	D3Z7P3|D3Z7P4|F7B327|F6U529	Gls	Glutaminase kidney isoform, mitochondrial	MOUSE	41	70.6	677.94	-0.123	0.319	0.103	0.212	-0.054	-0.178	-0.369	-0.092	0.66444	0.999706
F6RDM4	F6RDM4	Gls	Glutaminase (Fragment)	MOUSE	5	62.6	88.35	-0.047	0.341	0.077	0.225	0.041	-0.115	-0.128	-0.055	0.793278	0.999706
Q61290	Q61290|A0A087WS83|A0A1D5RLU3|E9QK20|A0A2I3BPS0	Cacna1e	Voltage-dependent R-type calcium channel subunit alpha-1E	MOUSE	54	25.9	677.07	0.04	-0.008	-0.019	-0.095	0.004	0.008	0.03	-0.007	0.801225	0.999706
A2AIR7	A2AIR7|O55017|A2AIR9|A2AIS0|A2AIZ9	Cacna1b	Voltage-dependent N-type calcium channel subunit alpha	MOUSE	42	17.9	529.46	0.121	0.011	0.031	-0.03	-0.003	0.041	0.003	0.022	0.865213	0.999706
A0A571BET0	A0A571BET0|P97445|E9Q1R5|A0A1L1SQZ2|A0A571BEF0	Cacna1a	Voltage-dependent P/Q-type calcium channel subunit alpha	MOUSE	40	16.9	424.14	0.055	0.015	-0.058	-0.086	0.006	0.056	-0.03	-0.048	0.398228	0.999706
A0A571BF18	A0A571BF18	Cacna1e	Voltage-dependent R-type calcium channel subunit alpha (Fragment)	MOUSE	18	28.5	205.98	0.128	0.001	0.032	-0.209	0.083	0.166	0.069	0.136	0.638022	0.999706
A2AJ01	A2AJ01	Cacna1b	Voltage-dependent N-type calcium channel subunit alpha-1B (Fragment)	MOUSE	2	25.4	23.6	0.267	0.42	0.297	0.5	0.023	0.072	0.161	0.098	0.121042	0.999706
B9EJ86	B9EJ86|A0A0R4J150|A0A5F8MPC5	Osbpl8	Oxysterol-binding protein-related protein 8	MOUSE	45	55.7	676.9	-0.045	-0.042	-0.117	-0.268	0.063	0.044	-0.076	-0.146	0.0428877	0.999706
G5E833	G5E833|Q9ER64|D3YWU9	Osbpl5	Oxysterol-binding protein	MOUSE	21	23.8	231.06	0.091	0.097	0.131	0.086	-0.045	0.019	0.165	0.039	0.276937	0.999706
Q8C547	Q8C547	Heatr5b	HEAT repeat-containing protein 5B	MOUSE	51	32.5	675.55	0.048	0.033	-0.012	-0.011	-0.041	0.066	0.008	0.004	0.884627	0.999706
A0A3B2W7H8	A0A3B2W7H8	Heatr5b	HEAT repeat-containing protein 5B	MOUSE	13	25.4	147.54	0.005	0.177	-0.136	-0.062	0.188	0.162	-0.117	0.101	0.0528087	0.999706
A0A1D5RMH7	A0A1D5RMH7|Q2PFD7|A0A1D5RLK2|F6Z9E6	Psd3	PH and SEC7 domain-containing protein 3	MOUSE	50	33.7	674.75	0.049	-0.206	0.009	-0.122	0.083	0.084	0.052	0.044	0.635535	0.999706
E9PUC5	E9PUC5|Q8C0E9	Psd3	PH and SEC7 domain-containing protein 3	MOUSE	40	75.2	516.84	0.148	-0.266	0.092	-0.372	0.224	0.353	0.304	0.016	0.211598	0.999706
F8WHU5	F8WHU5|Q4VA53	Pds5b	Sister chromatid cohesion protein PDS5 homolog B	MOUSE	55	36.3	674.19	0.137	0.5	0.063	0.178	-0.121	-0.098	-0.036	-0.059	0.609008	0.999706
Q6A026	Q6A026|E9QPI5	Pds5a	Sister chromatid cohesion protein PDS5 homolog A	MOUSE	33	24.4	391.64	0.101	0.571	0.043	0.127	-0.081	-0.071	-0.009	-0.056	0.488896	0.999706
Q80X82	Q80X82|S4R2Q3|D3Z2M2|F6UJ99	Sympk	Symplekin	MOUSE	53	45.4	672.49	0.018	0.104	-0.074	-0.079	-0.003	0.039	0.026	-0.075	0.332935	0.999706
M0QWP1	M0QWP1|Z4YK85|Z4YJS5	Agrn	Agrin	MOUSE	49	32.4	672.47	0.005	0.141	0.068	0.09	0.027	0.014	0.136	0.084	0.443207	0.999706
A2ASQ1	A2ASQ1	Agrn	Agrin	MOUSE	47	31.2	620.3	0.025	0.167	0.004	0.074	-0.07	-0.018	0.059	0.09	0.595778	0.999706
Q7TSK3	Q7TSK3	Pcdh8	Protocadherin-8	MOUSE	49	50.4	672.07	-0.192	-0.301	-0.232	-0.389	0.319	0.339	0.276	-0.012	0.573837	0.999706
Q91W43	Q91W43	Gldc	Glycine dehydrogenase (decarboxylating), mitochondrial	MOUSE	49	53.9	670.95	-0.183	0.299	-0.012	0.233	-0.046	-0.226	-0.299	-0.073	0.566659	0.999706
O54988	O54988|A0A5F8MPV2	Slk	STE20-like serine/threonine-protein kinase	MOUSE	48	47.8	669.5	0.024	-0.144	-0.013	-0.047	0.082	0.141	0.145	0.179	0.842396	0.999706
O55098	O55098	Stk10	Serine/threonine-protein kinase 10	MOUSE	7	6	64.88	-0.095	0.049	0.036	-0.039	-0.081	-0.077	-0.126	-0.145	0.567094	0.999706
P47708	P47708|A0A0J9YV12	Rph3a	Rabphilin-3A	MOUSE	46	65.3	667.94	0.012	-0.21	-0.006	-0.275	0.114	0.104	0.122	-0.014	0.262179	0.999706
P70169	P70169	Doc2b	Double C2-like domain-containing protein beta	MOUSE	7	16.5	91.23	0.04	-0.132	-0.055	-0.18	0.299	0.161	0.098	0.182	0.469839	0.999706
F8VPZ3	F8VPZ3|F6XDW8|G3UZF4|G3UXQ4|G3UX31	Usp32	Ubiquitinyl hydrolase 1	MOUSE	52	39.5	667.79	0.045	-0.107	0.016	0.013	0.076	0.045	0.005	0.042	0.717919	0.999706
Q9EPE9	Q9EPE9|A0A571BD32	Atp13a1	Endoplasmic reticulum transmembrane helix translocase	MOUSE	46	43.6	667.73	0.022	0.215	0.044	0.027	-0.018	0.012	-0.09	-0.058	0.397648	0.999706
Q6A068	Q6A068|A0A1W2P7H4|A0A1W2P7Z8|A0A1W2P7S8|A0A1W2P855|A0A1W2P6Q8	Cdc5l	Cell division cycle 5-like protein	MOUSE	50	61.2	667.72	-0.022	0.066	-0.025	-0.13	-0.076	0.006	-0.035	-0.176	0.0916023	0.999706
B1AZP2	B1AZP2|B7ZNS2|E9PUF2|F6YMR0|H3BJW9|H3BJD4|H3BKJ0|H3BL90	Dlgap4	Disks large-associated protein 4	MOUSE	47	52.3	667.46	-0.038	-0.173	-0.044	-0.143	0.026	0.057	0.016	0.022	0.858832	0.999706
Q0VF59	Q0VF59|Q8BJ42	Dlgap2	Disks large-associated protein 2	MOUSE	37	33	412.49	-0.034	-0.088	-0.02	-0.079	0.1	0.19	0.212	0.123	0.807564	0.999706
I1E4X0	I1E4X0	Dlgap4	Disks large-associated protein 4	MOUSE	15	70	247.84	-0.049	-0.02	-0.347	-0.365	0.045	0.155	0.1	0.05	0.439443	0.999706
P03995	P03995|Q6NXH9|E9Q1Z0|Q9DCV7|Q9Z2T6	Gfap	Glial fibrillary acidic protein	MOUSE	48	83.7	666.63	-0.366	-0.443	-0.288	-0.26	0.215	0.236	0.29	0.253	0.953685	0.999706
A0A5F8MP95	A0A5F8MP95|A0A571BD95|Q9ES00|G3UZD6|G3UZM6|H7BXC2	Ube4b	Ubiquitin conjugation factor E4 B	MOUSE	48	41.9	664.82	-0.008	0.128	0	0.158	-0.048	-0.036	-0.06	0.039	0.350386	0.999706
P13864	P13864|J3QNW0	Dnmt1	DNA (cytosine-5)-methyltransferase 1	MOUSE	50	35.8	664.45	0.099	0.654	0.174	0.239	-0.214	-0.134	-0.142	-0.072	0.483661	0.999706
P70392	P70392|D3Z6K8|F7B9R2|A0A1L1SS23|F6TYF8|D3Z685|F6TCD3	Rasgrf2	Ras-specific guanine nucleotide-releasing factor 2	MOUSE	51	46.4	664.32	-0.058	-0.23	-0.122	-0.001	0.142	0.157	0.213	0.209	0.742815	0.999706
P27671	P27671|Q9QZR7|A0A087WS68	Rasgrf1	Ras-specific guanine nucleotide-releasing factor 1	MOUSE	44	38.8	568.08	0.013	-0.087	0.048	0.125	0.058	0.054	0.152	0.232	0.0889282	0.999706
Q8CCB4	Q8CCB4|E9PXG9|E9PYD3|E9PWD1|E9Q648|F6Z4G7	Vps53	Vacuolar protein sorting-associated protein 53 homolog	MOUSE	47	65.3	663.99	0.067	-0.171	-0.08	-0.024	0.075	0.085	0.103	0.079	0.750239	0.999706
Q3THK7	Q3THK7	Gmps	GMP synthase [glutamine-hydrolyzing]	MOUSE	44	74.4	663.71	-0.021	0.222	-0.015	0.233	-0.036	-0.07	-0.119	0.138	0.126183	0.999706
Q8R1Q8	Q8R1Q8	Dync1li1	Cytoplasmic dynein 1 light intermediate chain 1	MOUSE	44	80.1	663.46	-0.042	-0.123	-0.035	-0.032	0.012	-0.05	-0.075	0.034	0.543656	0.999706
Q6PDL0	Q6PDL0|A0A1D5RM94|A0A1D5RMC1	Dync1li2	Cytoplasmic dynein 1 light intermediate chain 2	MOUSE	33	85.1	532.84	0	-0.158	0.01	-0.051	0.058	0.03	0.049	0.02	0.65881	0.999706
E9PWX1	E9PWX1|Q80VM5|Q9Z218|Q5U4C2	Dpp6	Dipeptidyl aminopeptidase-like protein 6	MOUSE	49	54.7	663.41	0.015	0.124	0.141	0.163	0.03	-0.102	-0.131	-0.024	0.937836	0.999706
E9QN98	E9QN98|Q6NXK7|A0A5F8MPK1|D3Z5I7	Dpp10	Inactive dipeptidyl peptidase 10	MOUSE	43	55.1	568.84	-0.002	-0.029	-0.055	-0.105	0.01	-0.007	-0.077	-0.099	0.31413	0.999706
F6QC57	F6QC57|F6RDS0	Ubr3	E3 ubiquitin-protein ligase	MOUSE	51	30.9	661.45	-0.023	-0.141	-0.127	-0.087	0.013	0.034	0.07	0.016	0.93015	0.999706
Q5U430	Q5U430|A2AV05	Ubr3	E3 ubiquitin-protein ligase UBR3	MOUSE	51	30.8	656.37	-0.094	-0.243	-0.249	-0.273	0.017	-0.086	-0.165	-0.174	0.0265052	0.999706
D3YXJ0	D3YXJ0|A0JP53|A0A2I3BQ43|A0A2I3BQA6|E9Q7N4|F6UUZ3	Dgkh	Diacylglycerol kinase eta	MOUSE	51	51.8	660.71	-0.101	-0.195	-0.136	-0.072	0.089	-0.012	-0.033	-0.005	0.521753	0.999706
E9PUQ8	E9PUQ8|A0A087WQ75|A0A087WP73|A0A087WP49	Dgkd	Diacylglycerol kinase delta	MOUSE	21	23.6	289	-0.174	-0.353	-0.481	-0.51	0.086	-0.026	-0.307	-0.305	0.00770235	0.999706
Q8JZQ9	Q8JZQ9|A0A0G2JG48	Eif3b	Eukaryotic translation initiation factor 3 subunit B	MOUSE	43	66.5	660.36	-0.101	-0.217	-0.174	-0.226	0.111	0.116	0.034	-0.1	0.415815	0.999706
O55029	O55029	Copb2	Coatomer subunit beta'	MOUSE	49	58	657.76	0.013	-0.056	-0.143	-0.013	0.02	0.138	0.074	0.068	0.893298	0.999706
A0A1Y7VNZ6	A0A1Y7VNZ6|A0A1Y7VJB1|A0A1Y7VK86	Mark3	Non-specific serine/threonine protein kinase	MOUSE	49	58.3	657.4	-0.031	-0.115	-0.061	-0.126	0.073	0.06	-0.004	-0.003	0.753095	0.999706
Q03141	Q03141	Mark3	MAP/microtubule affinity-regulating kinase 3	MOUSE	48	60	650.73	-0.265	-0.469	-0.485	-0.611	0.145	0.418	0.442	0.121	0.842206	0.999706
Q8VHJ5	Q8VHJ5|A0A0A6YY78	Mark1	Serine/threonine-protein kinase MARK1	MOUSE	44	56.8	618.58	-0.048	-0.202	-0.097	-0.196	0.063	0.086	0.071	0.02	0.754568	0.999706
E9QMP6	E9QMP6|Q05512|F6ZS70|A0A0R4J0B1|A0A0R4J227|Q3T9A3|E9PYX3|E9Q9N6|F7CVZ7|E9Q2J6|F7A3Q3|F6ZEX4|F6UY70|E9Q8H5|E9Q2G8|F7CRG8|E9PZ55|F6Z4Q6	Mark2	Non-specific serine/threonine protein kinase	MOUSE	41	53.3	531.39	-0.044	-0.128	-0.166	-0.196	0.065	0.069	0.026	-0.019	0.516487	0.999706
Q8CIP4	Q8CIP4|A0A140LIY2	Mark4	MAP/microtubule affinity-regulating kinase 4	MOUSE	27	39.6	343.01	0.016	-0.159	-0.024	-0.147	0.183	0.165	0.087	0.086	0.693524	0.999706
A0A1L1STE4	A0A1L1STE4|Q9Z1X4|Q45VK5|A0A1L1SSU8|A0A1L1ST48|A0A1L1SU19|A0A1L1SQ69|A0A1L1SR62	Ilf3	Interleukin enhancer-binding factor 3	MOUSE	47	55.2	654.86	0.007	-0.133	0.02	-0.079	-0.04	-0.008	-0.023	-0.112	0.516918	0.999706
Q91WM1	Q91WM1|A2BH82|A2BH83	Strbp	Spermatid perinuclear RNA-binding protein	MOUSE	45	68.3	614.92	-0.101	-0.206	-0.175	-0.369	0.096	0.108	0.002	-0.26	0.0459141	0.999706
A0A1L1SQR7	A0A1L1SQR7	Ilf3	Interleukin enhancer-binding factor 3 (Fragment)	MOUSE	10	37.8	126.13	0.815	-1.741	-2.047	-1.3	-0.297	0.939	1.87	1.256	0.986217	0.999706
Q8BIJ6	Q8BIJ6|E9PWN2|E9PWN3	Iars2	Isoleucine--tRNA ligase, mitochondrial	MOUSE	43	58.8	654.85	-0.09	0.236	0.02	0.202	-0.055	-0.157	-0.208	-0.082	0.657297	0.999706
Q91YR7	Q91YR7|B7ZCS1	Prpf6	Pre-mRNA-processing factor 6	MOUSE	50	55.4	654.59	0.018	0.201	-0.021	-0.055	-0.007	0.015	0.04	-0.051	0.393867	0.999706
Q8BMS1	Q8BMS1	Hadha	Trifunctional enzyme subunit alpha, mitochondrial	MOUSE	41	63.8	654.24	-0.205	0.363	-0.039	0.186	0.031	-0.145	-0.231	-0.038	0.567855	0.999706
Q9CZD3	Q9CZD3	Gars1	Glycine--tRNA ligase	MOUSE	45	64.6	653.89	-0.058	0.008	-0.018	0.017	0.077	0.057	-0.012	0.079	0.849209	0.999706
Q99PU5	Q99PU5|D3Z2G8|D3Z1Z2	Acsbg1	Long-chain-fatty-acid--CoA ligase ACSBG1	MOUSE	44	61.8	653.8	0.188	0.03	0.181	0.191	-0.101	-0.066	0.044	0.107	0.284909	0.999706
Q80YA9	Q80YA9|A2AI78|Q8BMA3	Cnksr2	Connector enhancer of kinase suppressor of ras 2	MOUSE	49	50	652.36	-0.09	-0.274	-0.206	-0.198	0.105	0.043	-0.004	-0.029	0.427524	0.999706
Q9WTX6	Q9WTX6|Q3TPM3|D3Z2H3|A0A0N4SUW1	Cul1	Cullin-1	MOUSE	48	63.6	651.34	0.059	-0.099	-0.053	-0.034	0.032	0.049	0.092	0.016	0.876661	0.999706
Q8R0G9	Q8R0G9	Nup133	Nuclear pore complex protein Nup133	MOUSE	46	49.7	650.57	0.011	0.154	0.047	0.052	0.006	-0.051	0.051	0.004	0.913128	0.999706
H3BIZ7	H3BIZ7|Q8BIE6|H3BL79|Q3TB04|H3BK97|F7CDA2|H3BJN6|H3BKK8|Q920B0|Q6ZQ04|A0A0N4SVT9|A0A5F8MPJ8	Frmd4a	FERM domain-containing protein 4A	MOUSE	50	46	650.37	-0.031	-0.141	-0.068	-0.086	0.032	0.084	0.077	0.116	0.985264	0.999706
A2A4A6	A2A4A6|Q62077|G3UXP4|F6SLL0|G3V016	Plcg1	1-phosphatidylinositol 4,5-bisphosphate phosphodiesterase gamma	MOUSE	44	44.2	650.25	-0.052	-0.074	0.052	0.034	0.03	-0.027	-0.103	0.053	0.778739	0.999706
E9QNY8	E9QNY8|Q9JLC8|A0A0R4J125|D3Z3H1|B2RRL5|A0A2I3BR28	Sacs	Sacsin	MOUSE	55	12.6	650	0.046	0.043	-0.073	-0.008	-0.056	0.014	0.059	0.007	0.985783	0.999706
Q8K394	Q8K394	Plcl2	Inactive phospholipase C-like protein 2	MOUSE	49	47.9	648.46	0.063	-0.152	0.013	-0.09	0.046	0.13	0.125	0.034	0.75658	0.999706
Q3USB7	Q3USB7	Plcl1	Inactive phospholipase C-like protein 1	MOUSE	41	43.5	553.7	-0.017	-0.043	0.043	-0.006	0.072	0.056	0.044	0.131	0.834708	0.999706
A0A494BAG2	A0A494BAG2|A0A494B953|A0A494B9F0|A0A494BA39|Q8CFI0|A0A494BAX0|G3X9H8|E9PXB7|A0A494B9L5|A0A494BAE4|A0A494BAD8|A0A286YCR1|A0A286YDV4|E9PYU8|Q9CUN6|E9Q4K9	Nedd4l	HECT-type E3 ubiquitin transferase	MOUSE	48	53.6	646.98	-0.013	-0.083	-0.038	-0.034	-0.043	-0.014	-0.066	0.028	0.826037	0.999706
P46935	P46935|A0A571BDN7|A0A571BEP7|Q3V335|V9GXK3|V9GWV8|V9GXS6	Nedd4	E3 ubiquitin-protein ligase NEDD4	MOUSE	45	53.1	647.71	0.039	0.032	-0.002	0.043	0.001	-0.024	0.007	0.01	0.980957	0.999706
Q9D4H8	Q9D4H8|E0CYT5|A0A3Q4EBZ1|H7BX52|A0A3Q4EI83	Cul2	Cullin-2	MOUSE	46	64.4	647.56	0.08	-0.137	-0.098	-0.06	0.039	0.062	0.117	0.052	0.848809	0.999706
Q8K2B3	Q8K2B3|A0A1Y7VJ55	Sdha	Succinate dehydrogenase [ubiquinone] flavoprotein subunit, mitochondrial	MOUSE	38	72.8	647.44	-0.158	0.187	0.02	0.116	-0.038	-0.121	-0.255	-0.047	0.569066	0.999706
Q8BMK4	Q8BMK4	Ckap4	Cytoskeleton-associated protein 4	MOUSE	44	78.7	646.41	-0.042	0.392	-0.082	-0.072	-0.009	0.017	-0.114	-0.3	0.0865231	0.999706
Q9QUJ7	Q9QUJ7	Acsl4	Long-chain-fatty-acid--CoA ligase 4	MOUSE	42	64.9	645.64	-0.052	-0.133	-0.08	-0.275	0.097	0.089	-0.039	-0.15	0.0958733	0.999706
Q9CZW4	Q9CZW4|E9PUC2|D3Z4I4	Acsl3	Long-chain-fatty-acid--CoA ligase 3	MOUSE	39	69.4	608.64	-0.014	-0.006	-0.028	-0.083	-0.001	0.062	-0.031	-0.102	0.379466	0.999706
Q91YQ5	Q91YQ5|A0A0N4SUJ8	Rpn1	Dolichyl-diphosphooligosaccharide--protein glycosyltransferase subunit 1	MOUSE	43	69.9	644.66	0.005	0.462	-0.005	-0.037	0.01	-0.071	-0.179	-0.291	0.223239	0.999706
H9KV00	H9KV00|Q9QX47|H9KV15|H9KV01|H9KV02|F7CU80	Son	Protein SON	MOUSE	51	22.9	643.78	-0.038	-0.241	-0.066	-0.207	0.031	0.015	-0.001	-0.062	0.341938	0.999706
Q99LG2	Q99LG2|E9PV58|A0A1B0GT37	Tnpo2	Transportin-2	MOUSE	41	61.7	643.73	-0.134	-0.074	-0.083	-0.023	0.015	0.043	-0.009	0.081	0.672873	0.999706
Q8BFY9	Q8BFY9	Tnpo1	Transportin-1	MOUSE	34	49.7	508.36	-0.017	0.178	0.03	-0.043	-0.092	-0.019	-0.072	-0.023	0.485547	0.999706
Q3TKD0	Q3TKD0|J3QMX2	Tnpo1	Transportin-1 (Fragment)	MOUSE	31	54.2	481.98	-0.12	-0.093	-0.094	-0.022	-0.051	0.023	-0.198	0.149	0.204303	0.999706
D3YUP9	D3YUP9|D3YUQ0|F7CDH3|F7AYY9|F6TDF4|F6SK63|F7BXL9	Adam22	Disintegrin and metalloproteinase domain-containing protein 22	MOUSE	41	57.1	643.71	0.048	0.052	0.076	0.009	-0.04	-0.023	-0.072	-0.037	0.994009	0.999706
Q9R1V6	Q9R1V6|F7DAP1|F6XIT3|F6PZ09|F7BZ55|F6VJ78|F6XRZ6|S4R1S5	Adam22	Disintegrin and metalloproteinase domain-containing protein 22	MOUSE	40	56	633.25	-0.066	-0.126	0.048	-0.039	-0.064	0.262	0.234	-0.044	0.419972	0.999706
E9Q912	E9Q912|A0A0G2JF70	Rap1gds1	Rap1 GTPase-GDP dissociation stimulator 1	MOUSE	39	74.2	643.41	-0.046	-0.127	0	0.048	0.035	0.032	0.047	0.139	0.374095	0.999706
A0A0G2JGC8	A0A0G2JGC8	Rap1gds1	RAP1, GTP-GDP dissociation stimulator 1	MOUSE	34	73.1	553.69	-2.116	-0.335	-0.121	0.104	-0.122	-0.448	-2.504	-0.118	0.412407	0.999706
Q99PU8	Q99PU8|A0A0G2JGL8|A0A0G2JE53|A0A0G2JGY7|A0A0G2JGL1|A0A0G2JGD9|A0A0G2JEY7|A0A0G2JFR1	Dhx30	ATP-dependent RNA helicase DHX30	MOUSE	53	47.9	642.38	-0.085	0.114	-0.136	-0.103	-0.023	-0.015	-0.071	-0.102	0.222578	0.999706
E9QAQ7	E9QAQ7|A2BH40	Arid1a	AT-rich interactive domain-containing protein 1A	MOUSE	46	28	642.17	0.038	-0.056	0.037	-0.049	-0.045	0.088	0.087	-0.082	0.570761	0.999706
A0A338P6U8	A0A338P6U8|E9Q4N7|E9Q6R4|E9Q4N6	Arid1b	AT-rich interactive domain-containing protein 1B	MOUSE	22	13.1	292.54	0.024	-0.049	0	-0.047	0.032	0.094	0.104	0.019	0.855714	0.999706
Q3TDD9	Q3TDD9	Ppp1r21	Protein phosphatase 1 regulatory subunit 21	MOUSE	47	64.4	642.03	-0.002	-0.207	-0.075	-0.112	0.074	0.067	0.018	0.107	0.792084	0.999706
E9PWM3	E9PWM3	Armcx4	Armadillo repeat-containing, X-linked 4	MOUSE	46	27.6	640.27	0.07	-0.058	-0.054	-0.173	0.007	0.032	0.03	-0.08	0.260776	0.999706
Q80TZ3	Q80TZ3|B1B0B7	Dnajc6	Putative tyrosine-protein phosphatase auxilin	MOUSE	44	58.7	638.38	-0.063	-0.209	-0.099	-0.056	0.027	-0.002	-0.075	0.086	0.425484	0.999706
A0A0R4J0F6	A0A0R4J0F6|Q99KY4|F6SLK1|D6RHK5|A0A0G2JFZ0|A0A0G2JEW6|A0A0G2JGP6|F7BG02	Gak	Cyclin-G-associated kinase	MOUSE	44	37.1	552.87	0.02	-0.042	-0.027	-0.009	0.002	0.006	0.004	0.028	0.979039	0.999706
B1B0B8	B1B0B8	Dnajc6	Putative tyrosine-protein phosphatase auxilin (Fragment)	MOUSE	12	64.9	142.1	-0.071	-0.157	-0.012	-0.056	0.134	0.002	-0.165	0.051	0.671005	0.999706
Q91V14	Q91V14|A0A076FR46	Slc12a5	Solute carrier family 12 member 5	MOUSE	46	37.5	638.17	0.095	0.055	0.057	0.017	-0.01	-0.059	-0.101	0.007	0.906317	0.999706
Q924N4	Q924N4|Q3V0N8|Q6P6P5|A2AGJ9	Slc12a6	Solute carrier family 12 member 6	MOUSE	26	20.6	269.01	0.058	-0.056	-0.05	-0.196	0.051	0.067	0.091	-0.105	0.125588	0.999706
F8WIJ0	F8WIJ0|Q9JIS8|F6TQE2	Slc12a4	Solute carrier family 12 member 4	MOUSE	24	19.3	277.59	0.014	0.183	0.012	0.085	-0.076	-0.068	-0.044	-0.078	0.835788	0.999706
A0A0J9YV84	A0A0J9YV84|A0A0J9YU26	Slc12a5	Solute carrier family 12 member 5	MOUSE	7	41.1	104.36	0.027	0.077	0.007	-0.101	0.014	-0.018	0.101	-0.124	0.221127	0.999706
Q6I6G8	Q6I6G8	Hecw2	E3 ubiquitin-protein ligase HECW2	MOUSE	54	35	638.02	-0.101	-0.136	-0.139	-0.177	0.03	-0.067	-0.069	-0.084	0.229285	0.999706
Q8K4P8	Q8K4P8|A0A1Y7VJ05|A0A1Y7VJ41|A0A1Y7VJB7	Hecw1	E3 ubiquitin-protein ligase HECW1	MOUSE	45	26.1	550.33	0.011	-0.111	-0.06	0.04	-0.031	0.009	0.065	0.009	0.867277	0.999706
Q9EQF6	Q9EQF6|Q3SYJ1	Dpysl5	Dihydropyrimidinase-related protein 5	MOUSE	39	77.4	637.86	-0.039	-0.139	0.073	0.062	0.048	-0.026	-0.09	0.126	0.408227	0.999706
Q61941	Q61941|Q8BGK0|Q8C9V5|E9Q8F4	Nnt	NAD(P) transhydrogenase, mitochondrial	MOUSE	45	43.5	637.43	-0.105	0.489	-0.097	0.21	-0.075	-0.069	-0.161	-0.139	0.320035	0.999706
P06745	P06745|A0A0U1RP97|A0A0U1RQ18|A0A0U1RQ72	Gpi	Glucose-6-phosphate isomerase	MOUSE	39	72.7	636.57	-0.143	-0.294	-0.075	-0.007	0.096	0.089	0.005	0.216	0.462822	0.999706
Q8VDP4	Q8VDP4	Ccar2	Cell cycle and apoptosis regulator protein 2	MOUSE	46	60.5	636.5	-0.046	0.005	-0.017	0.055	0.03	-0.043	-0.036	-0.046	0.985081	0.999706
Q9QYB5	Q9QYB5|A0A494BAX9|A0A494BBK1|A0A494B969	Add3	Gamma-adducin	MOUSE	43	66.1	636.4	0	-0.138	0.02	-0.096	0.053	0.032	0.048	-0.017	0.550763	0.999706
A0A494B9K4	A0A494B9K4	Add3	Gamma-adducin	MOUSE	43	66.5	632.74	-0.09	-0.246	-0.05	-0.076	-0.074	0.042	0.095	0.065	0.554084	0.999706
P53995	P53995|A2ATQ5|Q6PG65	Anapc1	Anaphase-promoting complex subunit 1	MOUSE	48	29.2	635.92	0.015	0.127	-0.03	0.073	-0.078	-0.014	-0.052	-0.013	0.564193	0.999706
G5E8T2	G5E8T2|O88196|A0A338P6W3|D6RFU5|D6RD03|D6RDD2|D6RHT6|A0A0R4J1T2|D3Z485|D3YZ03|D3Z2K0|F6XYB0|A0A338P6J6|A0A338P6H3|G5E8U3|F6ZS17|D3Z502|D3YZA6	Ttc3	RING-type E3 ubiquitin transferase	MOUSE	49	26.4	634.76	0.024	-0.001	-0.149	-0.154	0.017	0.078	0.037	-0.114	0.209927	0.999706
O35136	O35136	Ncam2	Neural cell adhesion molecule 2	MOUSE	43	57.3	634.24	0.081	0.054	0.037	-0.052	0.016	0.006	-0.038	-0.051	0.549301	0.999706
Q9CWF2	Q9CWF2	Tubb2b	Tubulin beta-2B chain	MOUSE	36	85.1	634.23	-0.081	0.031	0.216	0.167	0.072	-0.163	-0.216	0.057	0.765464	0.999706
Q9ERD7	Q9ERD7|A0A1D5RM76	Tubb3	Tubulin beta-3 chain	MOUSE	36	83.5	633.52	-0.233	0.097	0.278	0.206	0.091	-0.268	-0.4	0.029	0.87177	0.999706
P99024	P99024	Tubb5	Tubulin beta-5 chain	MOUSE	35	84.4	623.25	-0.22	0.113	0.265	0.233	0.034	-0.268	-0.499	-0.065	0.88473	0.999706
Q7TMM9	Q7TMM9	Tubb2a	Tubulin beta-2A chain	MOUSE	35	84.2	620.41	0.146	0.282	0.41	0.242	0.214	0.151	0.141	0.355	0.0735899	0.999706
P68372	P68372	Tubb4b	Tubulin beta-4B chain	MOUSE	35	84.2	620.13	-0.117	-0.17	-0.083	-0.041	-0.034	-0.1	-0.188	-0.078	0.265986	0.999706
Q9D6F9	Q9D6F9	Tubb4a	Tubulin beta-4A chain	MOUSE	33	84.4	582.88	-0.054	-0.019	0.193	0.114	0.016	-0.197	-0.261	-0.069	0.861658	0.999706
Q922F4	Q922F4	Tubb6	Tubulin beta-6 chain	MOUSE	22	55	332.09	-0.122	-0.093	0.189	0.103	0.045	-0.166	-0.222	-0.022	0.747466	0.999706
A2AQ07	A2AQ07	Tubb1	Tubulin beta-1 chain	MOUSE	8	15.5	104.38	0.658	1.253	1.688	1.339	0.242	-0.1	0.006	0.662	0.173341	0.999706
G3UZR1	G3UZR1	Tubb5	Tubulin beta-5 chain (Fragment)	MOUSE	6	92.4	115.84	0.776	-0.479	-0.404	-0.657	-0.16	0.544	1.078	0.288	0.845755	0.999706
A2A432	A2A432|E9PXY1|J3QJX0	Cul4b	Cullin-4B	MOUSE	49	53	633.75	0.018	-0.172	-0.114	-0.057	-0.025	0.056	0.029	0.048	0.917605	0.999706
Q3TCH7	Q3TCH7|E9PXT5|F6UV36	Cul4a	Cullin-4A	MOUSE	41	51.5	514.3	-0.048	-0.137	-0.102	-0.034	-0.021	0.027	0.042	0.068	0.830338	0.999706
Q80TM9	Q80TM9|F6YR29|F7AFP3|F6ZL69	Nisch	Nischarin	MOUSE	43	36.4	633.69	-0.044	-0.09	-0.05	-0.03	0.151	0.086	-0.019	0.085	0.809697	0.999706
P43406	P43406|A2AKI5|B7ZCI9|F6W6Q6	Itgav	Integrin alpha-V	MOUSE	43	48	633.6	-0.055	0.127	-0.003	0.025	0.015	-0.016	-0.052	-0.057	0.776944	0.999706
Q9Z103	Q9Z103	Adnp	Activity-dependent neuroprotector homeobox protein	MOUSE	46	45.1	632.68	0.066	0.094	0.137	0.068	-0.098	-0.093	-0.04	-0.134	0.861628	0.999706
Q8BKX1	Q8BKX1|B1AZ46	Baiap2	Brain-specific angiogenesis inhibitor 1-associated protein 2	MOUSE	45	84.8	630.74	0.051	-0.237	-0.022	-0.089	0.046	0.018	0.053	0.106	0.493683	0.999706
Q3TPX4	Q3TPX4|E9PZ92|E0CYX2	Exoc5	Exocyst complex component 5	MOUSE	42	59.4	630.23	0.008	-0.131	-0.099	-0.064	0.061	0.017	0.068	0.102	0.754061	0.999706
P09405	P09405|A0A087WRM5	Ncl	Nucleolin	MOUSE	49	53	629.03	0.01	-0.182	-0.065	-0.106	0.007	0.031	-0.086	-0.099	0.500477	0.999706
Q9EQJ9	Q9EQJ9|G5E8T6	Magi3	Membrane-associated guanylate kinase, WW and PDZ domain-containing protein 3	MOUSE	46	38.6	628.99	0.018	-0.128	-0.049	-0.166	0.032	0.059	0.066	-0.001	0.632695	0.999706
Q3UZR5	Q3UZR5|Q80XR2|H3BL44|H3BIX7|Q8BMS7|H3BLI6|H3BLC2|H3BJY0|H3BKB1|H3BJJ5|H3BJ99|A7L9Z8	Atp2c1	Calcium-transporting ATPase	MOUSE	41	54.6	628.11	0.032	0	-0.076	-0.181	0.03	0.071	0.018	-0.037	0.280857	0.999706
Q9JIK5	Q9JIK5	Ddx21	Nucleolar RNA helicase 2	MOUSE	44	58.2	627.58	0.046	0.473	0.095	-0.021	-0.15	-0.128	-0.101	-0.192	0.433475	0.999706
Q3UVL4	Q3UVL4|E0CX85|F6TKZ2	Vps51	Vacuolar protein sorting-associated protein 51 homolog	MOUSE	42	61.6	627.54	0.037	-0.029	-0.055	-0.015	-0.028	0.054	0.133	0.058	0.982028	0.999706
F8VPK8	F8VPK8|A0A0A6YY09|A0A0A6YWY8|A0A0A6YY37|A0A0A6YWM0	Pcdh9	Protocadherin 9	MOUSE	41	46.8	627.35	0.054	-0.015	-0.036	-0.162	-0.003	0.009	-0.016	-0.091	0.215673	0.999706
E9QNF7	E9QNF7|Q9CPW0|A0A0G2JE70|A0A140LJB1	Cntnap2	Contactin-associated protein-like 2	MOUSE	41	38.5	625.07	-0.062	-0.021	-0.005	-0.178	0.034	-0.02	-0.008	-0.041	0.485196	0.999706
P56480	P56480	Atp5f1b	ATP synthase subunit beta, mitochondrial	MOUSE	31	80.9	624.38	-0.118	0.16	0.128	0.205	0.046	-0.094	-0.197	0.134	0.487474	0.999706
Q925I1	Q925I1|H3BKI6|H3BK90|V9GWS5|V9GWS6	Atad3	ATPase family AAA domain-containing protein 3	MOUSE	44	71.4	623.47	-0.029	0.509	0.034	0.23	-0.029	-0.144	-0.323	-0.192	0.514694	0.999706
Q8JZQ2	Q8JZQ2	Afg3l2	AFG3-like protein 2	MOUSE	50	58.4	622.81	-0.049	0.369	-0.003	0.15	-0.05	-0.078	-0.191	-0.16	0.456879	0.999706
Q920A7	Q920A7	Afg3l1	AFG3-like protein 1	MOUSE	23	35.2	323.06	0.006	0.526	0.021	0.262	-0.156	-0.164	-0.194	-0.172	0.547026	0.999706
Q9QWY8	Q9QWY8|E9QN63|H3BJY2|H3BL41|E9QMJ1|H3BK40|H3BJM7	Asap1	Arf-GAP with SH3 domain, ANK repeat and PH domain-containing protein 1	MOUSE	43	45.1	594.7	-0.048	-0.188	-0.067	-0.14	0.103	0.081	0.008	0.03	0.811218	0.999706
E9PX52	E9PX52|J3KMP8	Asap2	Arf-GAP with SH3 domain, ANK repeat and PH domain-containing protein 2	MOUSE	42	54.5	622.8	0.084	-0.025	0	-0.16	0.075	0.123	0.144	-0.057	0.154505	0.999706
E9QMI7	E9QMI7|H3BKE6|H3BKD4	Asap1	Arf-GAP with SH3 domain, ANK repeat and PH domain-containing protein 1	MOUSE	42	46	586.61	-0.077	-0.219	-0.152	-0.202	0.183	0.218	0.187	0.078	0.898478	0.999706
Q7SIG6	Q7SIG6|D3YX85	Asap2	Arf-GAP with SH3 domain, ANK repeat and PH domain-containing protein 2	MOUSE	40	53.1	590.71	0.033	0.008	0.156	0.058	0.082	-0.003	0.034	0.057	0.523416	0.999706
Q8CH25	Q8CH25|A0A1L1STF9|A0A1L1SRL0	Sltm	SAFB-like transcription modulator	MOUSE	51	47.2	622.76	0.045	-0.139	-0.041	-0.216	-0.025	0.031	-0.01	-0.165	0.137117	0.999706
Q9QVP9	Q9QVP9|E9Q2A6|Q3UDE9|F7CCX1	Ptk2b	Protein-tyrosine kinase 2-beta	MOUSE	46	53	622.45	-0.048	-0.202	-0.153	0.002	0.055	0.099	0.161	0.243	0.552479	0.999706
P41233	P41233|E9Q6G4|Q91V24	Abca1	Phospholipid-transporting ATPase ABCA1	MOUSE	49	25.5	620.91	-0.002	0.245	0.039	0.248	-0.091	-0.086	-0.078	0.039	0.322401	0.999706
P41234	P41234|A2AJ26	Abca2	ATP-binding cassette sub-family A member 2	MOUSE	18	10.1	206.73	-0.025	0.089	-0.225	-0.167	-0.016	-0.002	-0.25	-0.145	0.0112311	0.999706
Q62245	Q62245	Sos1	Son of sevenless homolog 1	MOUSE	50	39.8	619.72	0.054	-0.029	0.007	-0.02	0.004	0.09	0.096	0.054	0.934383	0.999706
Q02384	Q02384|A0A0A0MQ87|S4R2C4	Sos2	Son of sevenless homolog 2	MOUSE	25	18	288.88	0.071	0.052	0.018	0.098	-0.015	0.025	0.024	0.017	0.866385	0.999706
Q8C052	Q8C052|A0A1D5RLY6|A0A1D5RMG7|A0A1D5RMF1|A0A1D5RML0	Map1s	Microtubule-associated protein 1S	MOUSE	46	54.9	619.09	-0.042	-0.062	0.078	0.017	0.02	0.007	-0.12	0.012	0.983148	0.999706
Q6P1Y9	Q6P1Y9|Q8R3S6|Q5PPR2|G3UVW9	Exoc1	Exocyst complex component 1	MOUSE	41	56.8	618.81	-0.158	-0.096	0.022	0.063	0.094	-0.006	-0.072	0.064	0.752922	0.999706
Q91VE0	Q91VE0	Slc27a4	Long-chain fatty acid transport protein 4	MOUSE	44	63.4	618.17	-0.039	0.083	-0.037	-0.017	-0.08	-0.025	-0.147	-0.105	0.348489	0.999706
Q60714	Q60714|A0A1D5RLC0	Slc27a1	Long-chain fatty acid transport protein 1	MOUSE	34	63.9	525.77	0.077	0.267	0.085	0.2	-0.122	-0.061	-0.086	0.012	0.488311	0.999706
Q924C1	Q924C1	Xpo5	Exportin-5	MOUSE	45	43.5	618.06	0.112	0.394	-0.003	0.145	-0.045	0.01	0.027	0.075	0.359896	0.999706
Q5SVJ0	Q5SVJ0|P28652|Q5SVI2|Q5SVI0|Q5SVI1|Q5SVJ1|Q5SVI3|Q68EG2|Q5SVI9	Camk2b	Calcium/calmodulin-dependent protein kinase	MOUSE	39	67.7	617.76	0.004	-0.131	0.014	0.014	0.047	0.057	0.013	0.077	0.811859	0.999706
E9Q1T1	E9Q1T1|A0A0G2JGS4|Q6PHZ2|Q8CCM0|D6RDQ8|E9QAJ4	Camk2d	Calcium/calmodulin-dependent protein kinase	MOUSE	36	76.9	568.72	-0.092	-0.329	-0.329	-0.111	-0.075	-0.092	-0.011	-0.083	0.275448	0.999706
E9Q1W0	E9Q1W0|E9Q1V9|F6RWZ9|E9PXV3	Camk2d	Calcium/calmodulin-dependent protein kinase	MOUSE	36	78.5	561.13	0.286	0.408	-0.127	0.474	-1.096	0.106	-0.196	-0.303	0.424319	0.999706
A0A2I3BQP6	A0A2I3BQP6|Q923T9|A0A286YCH4|A0A286YCI7	Camk2g	Calcium/calmodulin-dependent protein kinase	MOUSE	35	65.1	514.2	0.062	-0.088	0.092	0.076	0.185	0.109	-0.032	0.079	0.585888	0.999706
P11798	P11798|F8WIS9|F8WHB5|F6WHR9|D3Z7K9	Camk2a	Calcium/calmodulin-dependent protein kinase type II subunit alpha	MOUSE	30	58.9	447.21	-0.118	-0.085	0.023	0.143	0.077	0.061	0.039	0.236	0.113537	0.999706
A0A286YCW8	A0A286YCW8	Camk2g	Calcium/calmodulin-dependent protein kinase type II subunit gamma (Fragment)	MOUSE	24	94.8	351.17	0.071	-0.098	-0.098	0.091	0.092	-0.033	0.022	0.004	0.307525	0.999706
A0A286YDL6	A0A286YDL6|A0A286YCB8	Camk2g	Calcium/calmodulin-dependent protein kinase type II subunit gamma (Fragment)	MOUSE	21	84.6	293.41	0.205	0.188	0.194	0.366	0.078	0.091	1.081	0.423	0.14162	0.999706
Q9CWJ9	Q9CWJ9	Atic	Bifunctional purine biosynthesis protein ATIC	MOUSE	38	80.2	616.78	-0.059	0.053	0.045	0.104	0.013	-0.111	-0.162	0.027	0.675299	0.999706
A0A0R4IZY0	A0A0R4IZY0|Q8C1A5	Thop1	Thimet oligopeptidase	MOUSE	45	61.1	616.73	-0.099	-0.304	-0.219	-0.007	-0.008	-0.016	-0.095	0.109	0.125307	0.999706
Q80UK0	Q80UK0	Sestd1	SEC14 domain and spectrin repeat-containing protein 1	MOUSE	39	69.2	616.73	-0.022	-0.079	0.037	0.052	0.034	0.018	-0.048	0.075	0.712734	0.999706
Q6PGN3	Q6PGN3|A0A0A6YWI6|A0A0A6YX33	Dclk2	Serine/threonine-protein kinase DCLK2	MOUSE	42	61.5	616.28	0.041	-0.031	-0.032	-0.074	0.009	0.004	0.016	-0.074	0.556822	0.999706
A0A0A6YX71	A0A0A6YX71	Dclk2	Serine/threonine-protein kinase DCLK2	MOUSE	41	62.7	600.66	-0.099	-0.129	-0.441	-0.406	-0.086	0.253	0.267	-0.109	0.493379	0.999706
P37040	P37040|Q05DV1|E9Q997|E9PVT9|F6R7H8	Por	NADPH--cytochrome P450 reductase	MOUSE	40	64.8	616.09	-0.032	0.066	0.003	0.028	0.016	-0.043	-0.119	-0.066	0.867075	0.999706
A6ZI44	A6ZI44|P05064|P00883|D3YWI1|A6ZI46|Q9CPQ9|A0A0U1RPN8|D3Z510|A0A0U1RPT5|A6ZI47|D3YV98	Aldoa	Fructose-bisphosphate aldolase	MOUSE	37	79.6	615.97	-0.067	-0.158	0.039	0.016	0.064	0.051	-0.046	0.168	0.605099	0.999706
P05063	P05063	Aldoc	Fructose-bisphosphate aldolase C	MOUSE	33	84.8	549.5	0.106	0.047	0.169	0.268	-0.039	-0.109	-0.105	0.079	0.232954	0.999706
K3W4T3	K3W4T3|A2A599|Q920R6|Q9JHF5	Atp6v0a1	V-type proton ATPase subunit a	MOUSE	41	45.3	615.25	-0.237	0.031	0.092	0.08	0.028	-0.381	-0.452	-0.135	0.774307	0.999706
P15920	P15920|A0A0G2JFS2	Atp6v0a2	V-type proton ATPase 116 kDa subunit a2	MOUSE	15	15.7	192.43	0.116	0.133	-0.083	-0.081	-0.131	-0.042	0.137	-0.233	0.494115	0.999706
G3X972	G3X972|A0A286YDI8|A0A286YD08|A0A2I3BQS4	Sec24c	Sec24-related gene family, member C (S. cerevisiae)	MOUSE	40	50.6	615.01	-0.098	-0.255	-0.186	-0.134	0.028	0.089	0.011	0.018	0.817409	0.999706
P24270	P24270|A2AL20	Cat	Catalase	MOUSE	40	75.1	614.26	-0.012	0.04	0.107	0.131	-0.061	-0.133	-0.122	0.032	0.546339	0.999706
Q3UHD1	Q3UHD1|A0A087WQV8|E9Q4H5|A0A087WSA1	Adgrb1	Adhesion G protein-coupled receptor B1	MOUSE	46	34.8	614.06	0.157	0.045	0.095	-0.026	-0.03	0.049	0.076	0.04	0.71705	0.999706
E9PXF0	E9PXF0	Pcdh17	Protocadherin 17	MOUSE	45	46.1	613.28	-0.053	-0.15	-0.169	-0.421	0.113	0.117	0.076	-0.091	0.114605	0.999706
O35250	O35250|A2AAN0|A2AAN3|A2AAN4	Exoc7	Exocyst complex component 7	MOUSE	41	66.2	612.75	-0.035	-0.048	-0.003	-0.013	0.024	-0.042	-0.045	0.028	0.889412	0.999706
E9QNR5	E9QNR5|Q69ZU6|E9PWD2	Thsd7a	Thrombospondin type-1 domain-containing protein 7A	MOUSE	46	33.9	611.49	0.012	-0.072	-0.127	-0.198	0.038	0.06	0.096	0.004	0.642236	0.999706
Q5SSW2	Q5SSW2|F6R7K9|Q5SSW0	Psme4	Proteasome activator complex subunit 4	MOUSE	49	30.2	610.91	0.043	-0.004	-0.139	-0.044	-0.018	0.056	0.042	-0.034	0.815461	0.999706
P06801	P06801|Q3TQP6	Me1	NADP-dependent malic enzyme	MOUSE	36	84.2	610.85	-0.157	-0.047	0.181	0.22	0.035	-0.201	-0.298	0.075	0.48415	0.999706
Q9R1L5	Q9R1L5|E9Q6Q5|E9Q1M8|E9Q4Q9|E9Q6G0	Mast1	Microtubule-associated serine/threonine-protein kinase 1	MOUSE	50	36.9	610.8	0.131	-0.015	0.031	0.063	-0.1	-0.048	0.003	0.019	0.90233	0.999706
A0A1D5RM97	A0A1D5RM97|Q3U214|A0A1D5RLJ1	Mast3	Non-specific serine/threonine protein kinase	MOUSE	15	11.1	152.13	-0.075	-0.194	-0.19	-0.353	0.092	0.033	0.014	-0.043	0.231955	0.999706
E9Q1Q1	E9Q1Q1|E9QLW6|B1AST7|Q60592|B1AST8|A0A668KL31|A0A668KLF8|B1AST5|B1AST6	Mast2	Non-specific serine/threonine protein kinase	MOUSE	11	5.8	119.76	0.584	0.075	0.245	0.289	0.024	0.274	0.33	0.224	0.324151	0.999706
A0A668KMA1	A0A668KMA1|A0A0A6YXG1|Q811L6|E9QPR4|E9PWX8	Mast4	Non-specific serine/threonine protein kinase	MOUSE	9	3.2	92.57	-0.114	-0.059	-0.374	-0.007	-0.042	0.108	0.011	-0.081	0.449436	0.999706
Q80U95	Q80U95|A0A0G2JDR9	Ube3c	Ubiquitin-protein ligase E3C	MOUSE	45	48.1	610.53	0.063	0.003	-0.01	0.012	0.049	0.068	0.04	0.079	0.82943	0.999706
F6V2U0	F6V2U0|D3Z230|D3YUL8|E9Q9A0|D3YUD3|Q3UEQ1|Q9EPW0|E9QAD0|A0A0R4J0Q2|F6R4N2|A0A0A6YXS5	Inpp4a	Phosphatidylinositol-3,4-bisphosphate 4-phosphatase	MOUSE	41	50.4	609.36	-0.021	-0.041	0.019	0.089	-0.018	-0.03	-0.002	0.059	0.420613	0.999706
P31324	P31324|H3BK84	Prkar2b	cAMP-dependent protein kinase type II-beta regulatory subunit	MOUSE	33	87.9	608.74	-0.058	-0.083	0.03	0.032	0.06	0.013	-0.095	0.052	0.845204	0.999706
Q8K1M3	Q8K1M3|A0A0A6YX73|P12367|A0A0A6YY28	Prkar2a	Protein kinase, cAMP dependent regulatory, type II alpha	MOUSE	25	72.8	420.54	-0.007	-0.034	0.079	0.004	0.026	-0.049	-0.067	0.022	0.921425	0.999706
Q9EP53	Q9EP53|F2Z3X2|F2Z3W0	Tsc1	Hamartin	MOUSE	47	44.4	607.85	0.075	-0.043	0.002	-0.006	-0.046	0.047	0.056	0.104	0.95012	0.999706
Q8BUK6	Q8BUK6|F6W1A2	Hook3	Protein Hook homolog 3	MOUSE	45	61.8	607.43	-0.136	-0.269	-0.21	-0.123	0.155	0.169	0.112	0.088	0.97093	0.999706
Q9CZC8	Q9CZC8|A0A0N4SWD0|D3YXW0|A0A0N4SVR0	Scrn1	Secernin-1	MOUSE	33	82.8	605.74	-0.018	-0.134	-0.005	-0.06	0.041	0.071	0.014	0.141	0.925023	0.999706
Q01405	Q01405|E9Q1S3	Sec23a	Protein transport protein Sec23A	MOUSE	35	63	604.7	-0.107	-0.259	-0.13	-0.138	0.052	0.075	0.02	0.044	0.845087	0.999706
Q9D662	Q9D662|A2ANA0|A2AN99|A2AN98|A2AN97	Sec23b	Protein transport protein Sec23B	MOUSE	25	41	340.51	0.043	-0.001	0.061	0.164	-0.071	-0.09	-0.032	-0.044	0.681059	0.999706
Q9CZW5	Q9CZW5	Tomm70	Mitochondrial import receptor subunit TOM70	MOUSE	39	67.4	604.55	-0.023	0.239	-0.008	0.069	-0.015	-0.067	-0.172	-0.193	0.516722	0.999706
O88844	O88844|A0A087WRS9|A0A087WPT4|D3YVY3|A0A087WRM4	Idh1	Isocitrate dehydrogenase [NADP] cytoplasmic	MOUSE	40	86.7	604.05	-0.036	-0.158	0.054	0.038	0.031	-0.075	-0.148	0.106	0.355914	0.999706
P54071	P54071|D6RIL6|A0A0U1RP68|A0A0U1RPR1	Idh2	Isocitrate dehydrogenase [NADP], mitochondrial	MOUSE	34	68.5	490.48	-0.355	0.333	-0.084	0.237	0.001	-0.253	-0.27	-0.064	0.587006	0.999706
G5E924	G5E924|Q8R081|G3UY38|G3UY56|G3UYY3	Hnrnpl	Heterogeneous nuclear ribonucleoprotein L (Fragment)	MOUSE	37	77	604.05	-0.137	0.006	-0.068	-0.128	0.064	-0.001	-0.111	-0.047	0.591527	0.999706
B1AZI6	B1AZI6|E9Q5E2|F6SBF2|Q8C690|F6VK25|B8A4C2	Thoc2	THO complex subunit 2	MOUSE	46	30.5	603.85	0.003	-0.012	-0.021	-0.108	0.007	0.015	0.07	-0.075	0.394535	0.999706
A6H5Z3	A6H5Z3|E0CY34	Exoc6b	Exocyst complex component 6B	MOUSE	43	53.7	603.66	-0.04	-0.052	-0.101	-0.021	0.061	0.035	0.022	0.038	0.923525	0.999706
Q9D6Z1	Q9D6Z1|E0CXZ0|A2APD7|F7CHQ7|F7CHP9|F6USW7|F6V095|F6U250	Nop56	Nucleolar protein 56	MOUSE	38	73.1	603.36	0.06	0.277	0.048	-0.026	-0.034	-0.034	-0.03	-0.048	0.520906	0.999706
P61922	P61922|F7C9G3|Q3TUE8|F6RN86	Abat	4-aminobutyrate aminotransferase, mitochondrial	MOUSE	37	81	603.29	-0.116	0.353	0.243	0.37	-0.071	-0.158	-0.23	-0.097	0.701734	0.999706
Q6PGL7	Q6PGL7|A0A0N4SUJ0|A0A0N4SV74|A0A0N4SVK9	Washc2	WASH complex subunit 2	MOUSE	41	42.7	602.9	0.006	-0.162	-0.075	-0.085	0.041	0.022	0.038	-0.087	0.526439	0.999706
Q91YE6	Q91YE6|E9QKZ2|E0CXB2|F6TLX3|E0CY46|F6UT58	Ipo9	Importin-9	MOUSE	36	46.1	602.52	0.121	-0.004	0.016	0.034	-0.101	0.016	0.048	0.045	0.977883	0.999706
Q6P9Q6	Q6P9Q6|A0A6I8MWZ0|Q80YW9|Q80YW6|Q80YW7	Fkbp15	FK506-binding protein 15	MOUSE	44	43.6	602.34	0.037	-0.1	0.027	-0.053	0.004	0.016	0.018	-0.067	0.624365	0.999706
Q9EQ20	Q9EQ20|A0A1Y7VJ32	Aldh6a1	Methylmalonate-semialdehyde dehydrogenase [acylating], mitochondrial	MOUSE	38	78.5	602.24	-0.152	0.3	-0.04	0.222	-0.015	-0.163	-0.228	-0.092	0.587719	0.999706
P98203	P98203|A0A338P7H0	Arvcf	Armadillo repeat protein deleted in velo-cardio-facial syndrome homolog	MOUSE	46	56.2	601.75	-0.016	-0.097	-0.014	-0.005	0.034	-0.027	-0.003	0.011	0.732696	0.999706
E9Q3K3	E9Q3K3	Agap1	Arf-GAP with GTPase, ANK repeat and PH domain-containing protein 1	MOUSE	44	46	600.77	0.048	-0.049	0.084	0	0.025	-0.062	-0.029	-0.031	0.600405	0.999706
Q8VHH5	Q8VHH5|F8VQE9|A0A0G2JER6|A0A0G2JDW1	Agap3	Arf-GAP with GTPase, ANK repeat and PH domain-containing protein 3	MOUSE	34	39.6	482.55	-0.033	-0.062	0.013	-0.037	-0.013	0.108	-0.049	0.093	0.940714	0.999706
Q8BXK8	Q8BXK8|A0A087WRF2	Agap1	Arf-GAP with GTPase, ANK repeat and PH domain-containing protein 1	MOUSE	33	46.9	492.34	-0.038	-0.064	0.309	0.082	0.097	0.046	-0.104	0.107	0.850358	0.999706
A0A1D5RLD2	A0A1D5RLD2	Agap1	Arf-GAP with GTPase, ANK repeat and PH domain-containing protein 1 (Fragment)	MOUSE	2	25	43.73	-0.029	-0.289	-0.154	-0.283	0.091	0.119	-0.021	-0.076	0.351836	0.999706
B1AQZ2	B1AQZ2|P28741|Q3UI47|Q3TET1|B1AQZ5|F6V6Z9|E7FLY0|B1AVY7|A0A1D5RMD4|E9PX57|F7B335	Kif3a	Kinesin-like protein	MOUSE	46	59.7	599.71	0.021	-0.057	-0.084	0.006	0.041	0.05	-0.014	0.052	0.691907	0.999706
Q61771	Q61771|Q8C0X6|Q3V3Y6|Q9WV04|Q14BL9|Q99PW8|A2AM72|A2AKH9	Kif3b	Kinesin-like protein KIF3B	MOUSE	41	54.8	574	0.025	-0.198	-0.063	0.055	0.044	0.078	0.039	0.159	0.429775	0.999706
O35066	O35066|Q3UT07	Kif3c	Kinesin-like protein KIF3C	MOUSE	28	31.9	318.25	0.022	-0.05	-0.131	-0.256	0.103	0.116	0.063	-0.112	0.0780642	0.999706
O35231	O35231|E9PWU7|A0A1D5RLM0|A0A1D5RMF3|A0A1D5RLS5|A0A1D5RMG8|A0A1D5RMI2	Kifc3	Kinesin-like protein KIFC3	MOUSE	15	17.7	155.04	0.053	0.155	0.049	-0.098	0.085	0.031	-0.006	-0.082	0.156321	0.999706
P33174	P33174	Kif4	Chromosome-associated kinesin KIF4	MOUSE	12	10	132.47	0.243	0.567	0.262	0.385	-0.241	-0.286	-0.077	0.093	0.68335	0.999706
Q80TF6	Q80TF6	Stard9	StAR-related lipid transfer protein 9	MOUSE	9	2.7	64.57	0.214	-0.315	-0.246	-0.315	0.076	0.433	0.382	0.281	0.955468	0.999706
L0N7N1	L0N7N1|E9Q3T3	Kif14	Kinesin-like protein KIF14	MOUSE	7	3.5	49.64	0.137	-0.345	-0.321	-0.27	-0.076	-0.036	0.029	0.152	0.60471	0.999706
Q6RHR9	Q6RHR9|A0A0N4SUZ0|E9PZ12|A0A0N4SWH0|Q4VBG2|A0A0R4J0S6|A0A0N4SUP9	Magi1	Membrane-associated guanylate kinase, WW and PDZ domain-containing protein 1	MOUSE	43	35.4	599.05	-0.002	-0.115	-0.014	-0.129	0.008	0.064	0.072	-0.015	0.678532	0.999706
P54775	P54775|A0A140LIZ5	Psmc4	26S proteasome regulatory subunit 6B	MOUSE	38	85.6	598.63	-0.027	-0.135	-0.023	-0.02	0.016	-0.029	-0.066	-0.004	0.648912	0.999706
Q8K212	Q8K212|A0A494BAE9|A0A494BB22	Pacs1	Phosphofurin acidic cluster sorting protein 1	MOUSE	40	53.9	598.42	-0.068	-0.209	-0.134	-0.059	0.082	0.067	0.004	0.076	0.734266	0.999706
Q3V3Q7	Q3V3Q7|E9Q7E9|A0A1Y7VLZ7|A0A1Y7VN58	Pacs2	Phosphofurin acidic cluster sorting protein 2	MOUSE	28	40.7	386.42	0.013	-0.024	0.069	-0.012	-0.055	0.015	-0.063	-0.097	0.893765	0.999706
Q91W86	Q91W86|A0A1L1SRH3|A0A1L1SV27|A0A1L1STI8	Vps11	Vacuolar protein sorting-associated protein 11 homolog	MOUSE	49	53.8	598.22	0.055	-0.008	-0.082	-0.035	0.011	0.101	0.1	0.093	0.960429	0.999706
Q8BP47	Q8BP47|A0A498WGK2|A0A494BAX5|A0A494BB89|A0A494BAW6|A0A494B927|A0A494B996|A0A494B949|A0A494B9G0|A0A494BB92	NARS1	Asparagine--tRNA ligase, cytoplasmic	MOUSE	39	64.9	597.96	-0.02	0.052	0.04	0.131	-0.004	-0.026	-0.018	0.047	0.528906	0.999706
Q99NH0	Q99NH0|E9Q804|A0A0G2JDZ9|E9QKG6|A0A1W2P6X1|F7C545|F6RRY0|F6SI14	Ankrd17	Ankyrin repeat domain-containing protein 17	MOUSE	49	22.7	597.83	-0.051	-0.062	-0.128	-0.188	0.057	0.095	0.079	-0.054	0.403777	0.999706
E9PUR0	E9PUR0|E9Q1M6|F7DE17	Ankhd1	Ankyrin repeat and KH domain-containing 1	MOUSE	24	10.4	305.13	0.021	-0.008	-0.082	-0.097	0.003	0.023	0.066	-0.061	0.645837	0.999706
G5E8J3	G5E8J3|Q8K1X1|A0A0U1RQ40|A0A0U1RPD4	Wdr11	WD repeat-containing protein 11	MOUSE	43	41.7	597.47	0.059	-0.05	-0.031	0.012	0.057	0.099	0.12	0.113	0.845875	0.999706
Q9EPQ8	Q9EPQ8|A0A2R8VHC6|A0A2R8W6K2	Tcf20	Transcription factor 20	MOUSE	48	29.7	597.4	0.07	-0.002	-0.019	-0.095	-0.057	0.071	0.118	-0.08	0.493522	0.999706
Q61035	Q61035|A0A494BAV2|A0A494B9A1	Hars1	Histidine--tRNA ligase, cytoplasmic	MOUSE	42	78.7	597.17	-0.013	-0.181	-0.034	-0.024	0.077	0.123	0.027	0.127	0.891419	0.999706
Q99KK9	Q99KK9|G5E823	Hars2	Histidine--tRNA ligase, mitochondrial	MOUSE	25	49.5	302.95	-0.01	0.303	0.067	0.242	-0.031	-0.116	-0.127	-0.016	0.625992	0.999706
Q8CBB7	Q8CBB7|P22892	Ap1g1	AP-1 complex subunit gamma	MOUSE	43	49.4	596.87	-0.017	-0.249	-0.112	-0.133	0.025	0.061	0.048	0.084	0.817488	0.999706
O88512	O88512|D6RFT7	Ap1g2	AP-1 complex subunit gamma-like 2	MOUSE	4	5.3	41.06	0.01	0.001	-0.076	-0.211	0.225	0.145	0.124	0.144	0.563796	0.999706
Q5RJI5	Q5RJI5|D3Z5P0|G3UYP7	Brsk1	Serine/threonine-protein kinase BRSK1	MOUSE	44	63.7	595.99	0.034	-0.138	-0.031	-0.07	0.003	0.009	0.028	0.052	0.799587	0.999706
Q69Z98	Q69Z98|G3UZN4|G3UXY1|G3UZ00|O35280|G3UYC5	Brsk2	Serine/threonine-protein kinase BRSK2	MOUSE	34	48.1	497.71	-0.083	-0.263	-0.171	0.011	-0.038	0.031	0.209	0.226	0.3719	0.999706
G3UWV4	G3UWV4	Brsk2	Serine/threonine-protein kinase BRSK2	MOUSE	34	52.2	485.61	0.861	0.004	0.174	0.105	0.103	0.37	0.871	0.164	0.357723	0.999706
A0A0N4SW73	A0A0N4SW73|Q8R361	Rab11fip5	Rab11 family-interacting protein 5	MOUSE	39	38.9	595.97	0.041	-0.158	-0.112	-0.282	-0.018	0.067	-0.008	-0.165	0.124967	0.999706
Q61191	Q61191|B1AUX2|F6SJS2|F6T088	Hcfc1	Host cell factor 1	MOUSE	46	30.5	595.75	0.045	0.114	0.113	0.1	-0.065	-0.03	-0.09	-0.024	0.921491	0.999706
Q9D968	Q9D968|F6T0G2	Hcfc2	Host cell factor 2	MOUSE	4	5.9	37.83	-0.132	0.016	0.038	0.038	0.051	0.038	0.097	0.08	0.536354	0.999706
Q9WVQ1	Q9WVQ1|A0A140LHL1|A0A140LHB5|A0A0G2JGI5	Magi2	Membrane-associated guanylate kinase, WW and PDZ domain-containing protein 2	MOUSE	44	43	595.75	-0.034	-0.209	-0.104	-0.274	0.055	0.108	0.105	0.034	0.667484	0.999706
A0A0G2JE00	A0A0G2JE00|A0A0G2JEG6	Magi2	Membrane-associated guanylate kinase, WW and PDZ domain-containing protein 2	MOUSE	44	39	582.24	-0.131	-0.374	-0.071	-0.224	-0.148	-0.068	0.084	-0.028	0.165283	0.999706
Q8R5H1	Q8R5H1|A0A1W2P8B7	Usp15	Ubiquitin carboxyl-terminal hydrolase 15	MOUSE	41	51.5	595.59	-0.07	-0.078	-0.108	-0.091	0.004	0.006	-0.03	-0.132	0.457345	0.999706
P35123	P35123|A0A0A6YW28|A0A0A6YVY7|A0A0A6YWM7|A0A0A6YW63	Usp4	Ubiquitin carboxyl-terminal hydrolase 4	MOUSE	38	51.8	581.51	-0.016	0.175	0.155	0.148	-0.02	-0.126	-0.165	-0.05	0.967868	0.999706
Q99K46	Q99K46	Usp11	Ubiquitin carboxyl-terminal hydrolase 11	MOUSE	18	21.4	209.44	-0.034	0.168	-0.029	0.013	0.024	-0.054	-0.045	-0.04	0.82356	0.999706
Q04750	Q04750|Q8R4U6	Top1	DNA topoisomerase 1	MOUSE	48	57.3	595.38	-0.069	0.458	-0.02	-0.107	-0.114	-0.062	-0.098	-0.134	0.242805	0.999706
P40124	P40124|B1ARS0	Cap1	Adenylyl cyclase-associated protein 1	MOUSE	40	83.7	595.11	-0.055	-0.209	-0.053	-0.06	0.055	-0.008	-0.023	0.086	0.501634	0.999706
Q3V3R1	Q3V3R1	Mthfd1l	Monofunctional C1-tetrahydrofolate synthase, mitochondrial	MOUSE	39	51.9	594.9	-0.221	0.356	-0.033	0.033	0.036	-0.083	-0.212	-0.168	0.516286	0.999706
Q6GQT7	Q6GQT7|Q925T6|D3Z6T4|D3YZL8|H7BX09|D3YWY4|H7BX90|D3Z6R6|D3Z066|Q6X4T6	Grip1	Glutamate receptor-interacting protein 1	MOUSE	45	46.5	594.63	0.019	-0.112	-0.025	-0.077	0.05	0.072	0.05	0.059	0.943642	0.999706
Q80UG5	Q80UG5|A2A6U3|A2A6U5|A8Y5D3	Septin9	Septin-9	MOUSE	41	71.3	594.27	0	-0.118	0.104	0.018	0.007	-0.049	-0.064	0.056	0.579524	0.999706
Q8VDM6	Q8VDM6	Hnrnpul1	Heterogeneous nuclear ribonucleoprotein U-like protein 1	MOUSE	45	52.3	593.55	-0.088	0.116	-0.05	0.013	0.032	0.028	-0.049	-0.134	0.509268	0.999706
P30416	P30416|F6S2D5|F7CAT1	Fkbp4	Peptidyl-prolyl cis-trans isomerase FKBP4	MOUSE	38	79.2	593.49	0.047	-0.048	-0.023	-0.028	0.036	0.01	0.002	0.047	0.858553	0.999706
P35235	P35235	Ptpn11	Tyrosine-protein phosphatase non-receptor type 11	MOUSE	40	76.2	593.28	0.047	-0.061	0.041	0.068	-0.004	-0.037	-0.029	0.071	0.455965	0.999706
D3Z0X5	D3Z0X5|D3Z4N0|Q6PDH0|E9PWB1|E9PWW4|E9Q307|E9Q340|F7B296|F7AWU3	Phldb1	Pleckstrin homology-like domain family B member 1	MOUSE	54	37.6	593.26	0.069	-0.092	-0.008	-0.011	-0.063	-0.018	0.064	0.002	0.831909	0.999706
F6RUK9	F6RUK9|F6RYD0	Phldb1	Pleckstrin homology-like domain family B member 1 (Fragment)	MOUSE	48	43.7	537.09	0.384	-0.186	0.235	0.067	0.019	0.397	0.43	0.413	0.498437	0.999706
E9QAF4	E9QAF4	Phldb3	Pleckstrin homology-like domain, family B, member 3	MOUSE	3	5.2	31.86	0.297	-0.128	-0.198	-0.208	0.148	0.138	0.672	0.007	0.517857	0.999706
D3YVQ3	D3YVQ3|D3YVB9	Phldb1	Pleckstrin homology-like domain family B member 1 (Fragment)	MOUSE	3	16.7	28.08	0.028	-0.25	0.059	0.145	-0.01	-0.136	0.102	0.187	0.00891318	0.999706
O08688	O08688|D3YU84|D3Z432	Capn5	Calpain-5	MOUSE	42	72.8	592.97	-0.047	-0.067	-0.009	0.018	0.041	0.042	0.024	0.063	0.91625	0.999706
Q6NV83	Q6NV83|A0A087WRG2|A0A087WR93|A0A087WQT2	U2surp	U2 snRNP-associated SURP motif-containing protein	MOUSE	44	43.9	592.89	-0.019	-0.12	-0.031	-0.237	0.081	0.088	0.057	-0.111	0.125187	0.999706
A0A0R4J1E2	A0A0R4J1E2|F6ZFU0|E9PUM6|Q9CVV2|D3Z356	Eef1d	Elongation factor 1-delta	MOUSE	41	58.3	592.72	-0.018	-0.172	-0.058	-0.013	-0.003	0.039	-0.026	-0.078	0.88389	0.999706
Q80T06	Q80T06|P57776|Q91VK2|A0A0R4J1L2|E9QN08|D3YY68|D3YUQ9|D3YZT9|D3Z7N2	Eef1d	Elongation factor 1-delta	MOUSE	29	80	398.82	0.136	-0.169	0.102	-0.07	0.008	-0.062	0.002	0.121	0.375195	0.999706
O70251	O70251|A0A087WS46|G3UX43|G3UZ47|M0QWH8|M0QWK5	Eef1b	Elongation factor 1-beta	MOUSE	20	82.6	305.83	-0.076	-0.323	-0.27	-0.234	0.065	0.135	-0.031	-0.088	0.461098	0.999706
Q9R0H0	Q9R0H0	Acox1	Peroxisomal acyl-coenzyme A oxidase 1	MOUSE	42	67.1	592.37	-0.058	-0.114	0.103	0.086	0.047	-0.027	0.011	0.037	0.424259	0.999706
A2A848	A2A848	Acox1	Peroxisomal acyl-coenzyme A oxidase 1 (Fragment)	MOUSE	35	62.8	494.9	-0.099	0.074	-0.141	-0.05	-0.156	-0.082	-0.177	-0.399	0.164103	0.999706
Q7TNM2	Q7TNM2|D3YXA6|Q3TC52|E9PUI3|D3YYF9	Trim46	Tripartite motif-containing protein 46	MOUSE	39	65.2	590.7	0.01	0.065	0.001	0.066	-0.058	-0.1	-0.148	0.021	0.587866	0.999706
H3BIV5	H3BIV5|D3YVF0	Akap5	A-kinase anchor protein 5	MOUSE	33	65.6	589.02	0.197	-0.002	0.063	-0.115	-0.014	-0.025	0.006	0.025	0.621078	0.999706
Q9Z2I0	Q9Z2I0	Letm1	Mitochondrial proton/calcium exchanger protein	MOUSE	39	53.9	587.87	-0.085	0.42	-0.003	0.155	-0.008	-0.094	-0.25	-0.235	0.490015	0.999706
A0A0U1RPL0	A0A0U1RPL0|Q7TQH0|E9Q5Q0|J3QP59	Atxn2l	Ataxin-2-like protein	MOUSE	42	41.3	587.33	-0.076	-0.32	-0.29	-0.339	0.109	0.114	0.034	-0.095	0.293352	0.999706
Q3TGG2	Q3TGG2	Atxn2l	Ataxin-2-like protein	MOUSE	39	39.1	527.82	0.07	-0.23	0.161	-0.072	-0.223	0.235	-0.068	-0.334	0.684093	0.999706
P14211	P14211	Calr	Calreticulin	MOUSE	37	83.8	586.2	-0.017	-0.204	-0.023	-0.101	-0.015	-0.007	-0.071	-0.002	0.662152	0.999706
Q3TPJ8	Q3TPJ8|A2BFF9|O88487|A2BFF5|A2BFF8	Dync1i2	Cytoplasmic dynein 1 intermediate chain 2	MOUSE	33	73.4	585.67	-0.035	-0.145	0.047	0.044	0.021	-0.012	0.004	0.102	0.341338	0.999706
O88485	O88485|D3Z0M6	Dync1i1	Cytoplasmic dynein 1 intermediate chain 1	MOUSE	31	60.8	499.88	0.052	0.005	-0.049	0.053	-0.132	0.016	-0.029	0.056	0.689992	0.999706
Q3TYJ3	Q3TYJ3|A0A0N4SVS1	Dync1i1	Cytoplasmic dynein 1 intermediate chain 1	MOUSE	30	60.1	480.69	-0.296	-0.386	0	-0.164	0.111	-0.252	0.203	0.004	0.0433111	0.999706
Q6PGF7	Q6PGF7	Exoc8	Exocyst complex component 8	MOUSE	42	62.1	585.67	-0.052	-0.14	-0.078	-0.066	0.018	-0.001	0.026	0.01	0.814574	0.999706
Q8BZH4	Q8BZH4|D3YUX1|D3YUW8|Q0VGT3|F7D0L1	Pogz	Pogo transposable element with ZNF domain	MOUSE	45	39.8	585.6	0.006	0.049	0.053	-0.022	-0.034	-0.06	-0.012	-0.051	0.906205	0.999706
A0A1W2P7Y1	A0A1W2P7Y1|P35822|B2RRF0|A0A1W2P706	Ptprk	Protein-tyrosine-phosphatase	MOUSE	46	35.1	585.54	-0.102	-0.174	-0.121	-0.189	0.099	0.169	0.128	0.047	0.920117	0.999706
A2RSJ4	A2RSJ4|Q8C318|A0A1W2P7N7	Uhrf1bp1l	UHRF1-binding protein 1-like	MOUSE	45	35.9	585.16	0.057	-0.161	-0.034	-0.084	0.069	0.129	0.156	0.121	0.862757	0.999706
Q80SW1	Q80SW1|D3Z2Q0|F7ATQ6	Ahcyl1	S-adenosylhomocysteine hydrolase-like protein 1	MOUSE	40	69.8	585.05	-0.179	-0.217	-0.057	-0.076	0.053	-0.022	0.003	0.028	0.580429	0.999706
F8WGT1	F8WGT1|Q68FL4|F8WI65|H3BKT5|D3YYM7|H3BL31|D3YX97|E9PX77|A0A0N4SUY4	Ahcyl2	Putative adenosylhomocysteinase 3	MOUSE	39	57.5	514.83	0.011	-0.162	0.066	-0.087	0.019	-0.002	0.029	0.122	0.620069	0.999706
Q3UV20	Q3UV20|A0A217FL82|P60755|A0A1Y7VIL8|A0A1Y7VJM7|F6UYI7	Mdga2	MAM domain-containing glycosylphosphatidylinositol anchor protein 2	MOUSE	41	47.8	584.97	0.024	0.049	0.041	-0.051	0.005	0.005	-0.073	-0.076	0.632926	0.999706
Q6P2B1	Q6P2B1|F6TDZ2|E9Q0H8	Tnpo3	Transportin-3	MOUSE	39	54.4	584.53	-0.032	-0.029	-0.088	-0.053	-0.011	-0.003	0.016	0.046	0.968428	0.999706
P60843	P60843	Eif4a1	Eukaryotic initiation factor 4A-I	MOUSE	36	88.9	582.24	-0.05	0.273	0.107	0.217	0.077	-0.005	-0.109	0.078	0.452351	0.999706
Q91VC3	Q91VC3|A0A0N4SVP8|A2AFK7|E9PV04|A0A0N4SVM5	Eif4a3	Eukaryotic initiation factor 4A-III	MOUSE	35	82.4	492.9	-0.178	0.138	0.139	0.15	0.077	-0.188	-0.264	-0.009	0.915061	0.999706
P10630	P10630|Q8BTU6|E9Q561|D6RJ60	Eif4a2	Eukaryotic initiation factor 4A-II	MOUSE	32	81.5	504.99	0.009	-0.17	-0.201	-0.009	0.184	0.17	-0.013	0.027	0.430634	0.999706
A7YQ68	A7YQ68|Q80Y24	Prickle2	Prickle-like 2 (Drosophila)	MOUSE	43	61.1	581.52	-0.003	-0.14	-0.034	-0.087	-0.081	-0.013	0.03	0.052	0.803882	0.999706
O35286	O35286|Q497W9|A0A0G2JG10|A0A0G2JGQ5	Dhx15	Pre-mRNA-splicing factor ATP-dependent RNA helicase DHX15	MOUSE	43	51.6	581.48	-0.064	0.247	0.077	0.047	0.056	0.048	0.008	-0.005	0.416114	0.999706
G3X8X0	G3X8X0|Q05BH3	Dhx16	RNA helicase	MOUSE	12	12.4	140.6	0.117	0.297	0.087	0.113	0.091	0.073	0.203	0.081	0.275607	0.999706
A2A4P0	A2A4P0|A2A4N9	Dhx8	ATP-dependent RNA helicase DHX8	MOUSE	11	9.3	132.53	-0.018	-0.125	-0.139	-0.111	0.077	0.149	0.085	-0.084	0.662747	0.999706
P80560	P80560|Q3UU93	Ptprn2	Receptor-type tyrosine-protein phosphatase N2	MOUSE	41	49.5	581.15	0.048	-0.07	0.179	-0.002	0.039	-0.039	0.055	0.151	0.301942	0.999706
Q60673	Q60673|A6MDD2|A0A087WQF2|A0A087WPU7|A0A087WQ67	Ptprn	Receptor-type tyrosine-protein phosphatase-like N	MOUSE	19	27.3	263.71	-0.234	-0.282	-0.091	-0.095	0.35	0.288	0.275	0.348	0.891625	0.999706
Q9D0F9	Q9D0F9|A2CEK3|Q8BZF8	Pgm1	Phosphoglucomutase-1	MOUSE	36	76.3	580.45	0.029	-0.228	-0.002	0.034	0.06	0.154	0.024	0.163	0.749793	0.999706
Q3UE92	Q3UE92|Q6P1B1|S4R1I3|A0A494BBG8|S4R228	Xpnpep1	Xaa-Pro aminopeptidase 1	MOUSE	39	71.9	580.22	0.053	-0.124	0.013	0.016	0.007	0.045	0.036	0.097	0.730307	0.999706
Q91V35	Q91V35|P18052|A0A2R8VHH6	Ptpra	Receptor-type tyrosine-protein phosphatase alpha	MOUSE	39	55.8	580.16	0.099	0.074	0.014	-0.027	-0.046	0.052	0.066	-0.047	0.643548	0.999706
A0A1B0GRT6	A0A1B0GRT6|A0A1B0GRH2|P49446	Ptpre	Receptor-type tyrosine-protein phosphatase	MOUSE	20	32.6	288.05	0.151	0.01	0.013	-0.02	-0.037	-0.076	-0.048	-0.015	0.747958	0.999706
B9EJA2	B9EJA2|D3Z1E3|F6Q1W8|D3Z551	Cttnbp2	Cortactin-binding protein 2	MOUSE	45	25.9	579.44	-0.02	-0.162	-0.182	-0.177	0.026	-0.005	0.062	-0.101	0.374638	0.999706
Q99LJ0	Q99LJ0|A0A0G2JFS0	Cttnbp2nl	CTTNBP2 N-terminal-like protein	MOUSE	28	45.1	333.28	0.066	-0.143	-0.054	-0.089	-0.026	0.041	0.09	-0.029	0.786803	0.999706
A0A3B2WCN9	A0A3B2WCN9|Q9Z0U1|A0A3B2WBH9|A0A494B9E6	Tjp2	Tight junction protein ZO-2	MOUSE	47	40	579.36	0.082	-0.011	0.038	0.04	-0.074	-0.028	0.043	0.036	0.864478	0.999706
Q01279	Q01279|Q9WVF5|P70424|Q5SVE7	Egfr	Epidermal growth factor receptor	MOUSE	45	43.8	579.02	0.11	0.267	0.135	0.18	-0.02	-0.046	-0.015	0.009	0.66759	0.999706
Q61527	Q61527|B2KGF7	Erbb4	Receptor tyrosine-protein kinase erbB-4	MOUSE	34	32.5	481.72	0.076	0.008	-0.014	-0.125	0.05	0.017	-0.08	-0.113	0.115271	0.999706
O55106	O55106|F8WH41	Strn	Striatin	MOUSE	36	64.2	578.8	-0.014	-0.177	-0.109	-0.149	0.057	0.039	-0.032	-0.05	0.427894	0.999706
F6Z700	F6Z700	Strn	Striatin (Fragment)	MOUSE	14	72.2	205.76	-0.086	-0.14	-0.163	-0.266	-0.09	-0.116	-0.07	-0.144	0.0821375	0.999706
P10126	P10126|D3YZ68|D3Z3I8	Eef1a1	Elongation factor 1-alpha 1	MOUSE	36	77.9	578.47	0	0.208	0.027	0.1	-0.005	-0.039	-0.11	0.021	0.55804	0.999706
P62631	P62631	Eef1a2	Elongation factor 1-alpha 2	MOUSE	29	76.6	443.71	-0.056	-0.145	-0.162	-0.016	0.018	0.013	-0.1	0.016	0.285674	0.999706
Q8R050	Q8R050|F7CE88	Gspt1	Eukaryotic peptide chain release factor GTP-binding subunit ERF3A	MOUSE	39	61.4	577.59	0.063	0.013	0.016	0.028	0.006	0.009	-0.016	0.085	0.82553	0.999706
Q149F3	Q149F3|Q8BQF5	Gspt2	Eukaryotic peptide chain release factor GTP-binding subunit ERF3B	MOUSE	39	75.6	573.91	0.046	-0.124	0.066	-0.01	0.058	0.126	0.075	0.216	0.709821	0.999706
Q8K400	Q8K400|D3Z079|D3Z2Q2|F6WXQ4	Stxbp5	Syntaxin-binding protein 5	MOUSE	40	47.2	577.36	0.105	-0.083	-0.066	0.028	0.053	0.074	0.073	0.095	0.685129	0.999706
Q8VHM5	Q8VHM5|F7B5B5|A2AW41|V9GWW3|A2AW40|S4R1E9|G3UXU5	Hnrnpr	Heterogeneous nuclear ribonucleoprotein R	MOUSE	38	64.2	577.32	-0.079	-0.085	-0.105	-0.175	0.025	0.031	-0.049	-0.089	0.283406	0.999706
Q7TMK9	Q7TMK9|G3V018|G3UWM1|G3XA76	Syncrip	Heterogeneous nuclear ribonucleoprotein Q	MOUSE	33	63.7	524.57	0.04	-0.224	-0.138	-0.155	-0.176	-0.033	-0.073	-0.25	0.351669	0.999706
A0A0R4J259	A0A0R4J259|G3UZI2|G3UZ48|G3UXJ6|G3UYK7|G3UY67	Syncrip	Heterogeneous nuclear ribonucleoprotein Q	MOUSE	30	62.3	474.19	0.186	0.166	0.043	0.034	-0.17	0.275	0.287	0.01	0.3774	0.999706
Q6NS60	Q6NS60	Fbxo41	F-box only protein 41	MOUSE	40	57.2	576.98	0.108	-0.032	0.021	-0.049	0.026	0.052	0.057	0.084	0.860445	0.999706
P14685	P14685|F7B7L8	Psmd3	26S proteasome non-ATPase regulatory subunit 3	MOUSE	42	69.6	576.89	0.026	-0.145	-0.054	0.012	0.008	0.032	0.064	0.101	0.659889	0.999706
A2AI21	A2AI21|P35438|A2AI14|A2AI17|A2AI16	Grin1	Glutamate receptor	MOUSE	45	43.3	575.07	-0.041	-0.053	-0.094	-0.145	0.077	0.123	0.067	0.06	0.860975	0.999706
A2AI20	A2AI20|A2AI19	Grin1	Glutamate receptor	MOUSE	43	43.6	551.84	-0.023	-0.062	0.146	-0.303	0.311	0.272	0.345	0.24	0.307036	0.999706
Q99K48	Q99K48|B1AXT0	Nono	Non-POU domain-containing octamer-binding protein	MOUSE	41	74.6	575.04	0.033	-0.021	0.049	-0.026	-0.003	-0.002	-0.01	-0.021	0.93476	0.999706
A0A286YCX6	A0A286YCX6|E9PY51|A0A286YCE0	Trappc8	Trafficking protein particle complex 8	MOUSE	45	37.3	574.96	-0.069	-0.055	-0.039	0.067	-0.009	-0.032	-0.125	-0.039	0.629246	0.999706
Q80U93	Q80U93|A0A0A6YW83|A2ATN3	Nup214	Nuclear pore complex protein Nup214	MOUSE	44	26.8	574.65	0.055	-0.13	-0.014	-0.096	-0.024	0.055	0.058	-0.023	0.792897	0.999706
P60670	P60670	Nploc4	Nuclear protein localization protein 4 homolog	MOUSE	39	72.5	574.42	-0.067	-0.066	-0.067	0.009	0.011	-0.035	-0.109	-0.006	0.544705	0.999706
E9PYG6	E9PYG6|A0A286YDU0	Rasa1	RAS p21 protein activator 1	MOUSE	43	49.9	573.82	0.016	0.001	-0.019	-0.006	-0.036	0.022	-0.034	0.028	0.956348	0.999706
B2M1R6	B2M1R6|H3BKD0|H3BKI8|H3BLP7|Q8BT23|H3BJS9|H3BJ43|A0A286YE41	Hnrnpk	Heterogeneous nuclear ribonucleoprotein K	MOUSE	35	84.5	561.98	-0.095	-0.013	-0.039	-0.047	0.056	-0.028	-0.082	-0.061	0.857615	0.999706
P61979	P61979|H3BLL4|H3BK96|A0A286YDM3|A0A286YCM2|A0A286YEC4|A0A286YDH1	Hnrnpk	Heterogeneous nuclear ribonucleoprotein K	MOUSE	34	83.8	573.6	-0.367	0.176	0.49	0.294	0.132	-0.128	-0.702	0.308	0.762883	0.999706
P61222	P61222	Abce1	ATP-binding cassette sub-family E member 1	MOUSE	42	67.1	573.38	0.009	0.155	0.03	0.142	0.029	-0.035	-0.044	0.05	0.582529	0.999706
Q922P8	Q922P8|D3Z4S6|A0A494BBJ3	Tmem132a	Transmembrane protein 132A	MOUSE	39	49.5	573.34	-0.008	0.145	0.118	0.035	0	-0.019	0.015	0.041	0.736768	0.999706
F8VQK3	F8VQK3	Gucy1a2	Guanylate cyclase	MOUSE	38	64.5	572.75	0.01	-0.006	0	-0.159	0.052	0.085	0.025	-0.023	0.34813	0.999706
Q8BLN5	Q8BLN5|F7BJL0	Lss	Lanosterol synthase	MOUSE	37	60.4	572.61	-0.022	-0.037	-0.033	-0.098	0.043	0.073	0.019	-0.059	0.546862	0.999706
P47738	P47738|A0A0G2JFQ0|A0A0G2JF60|D3YYF3|P24549	Aldh2	Aldehyde dehydrogenase, mitochondrial	MOUSE	36	78.9	572.2	-0.222	0.347	-0.001	0.294	-0.05	-0.3	-0.424	-0.135	0.598813	0.999706
A0A0G2JEU1	A0A0G2JEU1	Aldh2	Aldehyde dehydrogenase, mitochondrial	MOUSE	34	79.1	529.08	0.061	-0.216	-0.118	-0.063	-0.326	0.042	-0.04	0.188	0.724205	0.999706
Q9CZS1	Q9CZS1|G3UYH1	Aldh1b1	Aldehyde dehydrogenase X, mitochondrial	MOUSE	32	71.8	444.36	-0.086	0.373	0.117	0.187	-0.072	-0.243	-0.389	-0.202	0.815962	0.999706
Q9JHW9	Q9JHW9|Q62148|G3UWP3	Aldh1a3	Aldehyde dehydrogenase family 1 member A3	MOUSE	8	13.6	102.04	-0.035	-0.204	-0.003	-0.068	0.195	-0.059	0.076	0.222	0.221253	0.999706
O35945	O35945	Aldh1a7	Aldehyde dehydrogenase, cytosolic 1	MOUSE	5	7.1	55	0.419	0.432	0.426	0.231	-0.032	-0.124	0.165	0.279	0.371645	0.999706
O88444	O88444	Adcy1	Adenylate cyclase type 1	MOUSE	38	41.3	571.61	0.04	0.047	0.023	0.038	-0.042	0.01	-0.019	0.024	0.948949	0.999706
Q80VP0	Q80VP0	Tecpr1	Tectonin beta-propeller repeat-containing protein 1	MOUSE	41	38.4	570.61	-0.007	-0.147	0.015	0.039	0.027	0.01	0.062	0.105	0.362895	0.999706
Q8C854	Q8C854|A2ATP6|A2ATP5|G8JL68|F6XJA1	Myef2	Myelin expression factor 2	MOUSE	39	78	569.98	-0.07	-0.062	-0.007	-0.153	0.083	-0.027	-0.097	-0.021	0.710633	0.999706
D3Z041	D3Z041|P41216|D3Z457|D3YVF6|F6WNZ2|A0A1B0GRS8	Acsl1	Long-chain-fatty-acid--CoA ligase 1	MOUSE	39	58.5	568.59	-0.007	-0.067	-0.018	-0.18	0.03	0.012	0	-0.053	0.334678	0.999706
Q8JZR0	Q8JZR0|A0A286YD68	Acsl5	Long-chain-fatty-acid--CoA ligase 5	MOUSE	11	15.2	126.88	-0.072	-0.139	-0.139	-0.302	0.112	0.206	0.107	0.049	0.604465	0.999706
E9Q1G8	E9Q1G8|E9Q9F5|Q9DA97|S4R2P6	Septin7	Septin	MOUSE	39	72.3	567.49	-0.087	-0.11	-0.028	-0.031	0.046	-0.025	-0.088	0.055	0.718863	0.999706
O55131	O55131	Septin7	Septin-7	MOUSE	39	72.2	566.7	-0.061	-0.346	-0.19	-0.356	-0.068	0.06	0.043	-0.061	0.452959	0.999706
Q8C1B7	Q8C1B7|A0A0J9YUL3|A0A0J9YTY0|A0A0J9YVA6|A0A0J9YUV6	Septin11	Septin-11	MOUSE	31	70	451.08	-0.086	-0.114	0.063	0.012	0.06	-0.025	-0.124	0.143	0.636844	0.999706
B1AQZ0	B1AQZ0|B1AQY9|Q8CHH9|B7ZC46	Septin8	Septin-8	MOUSE	29	64.8	390.97	-0.02	-0.122	-0.1	-0.112	0.044	-0.034	-0.057	-0.069	0.29373	0.999706
Q9R1T4	Q9R1T4|D3Z3C0|D3YYB1|F6WYM0|D3YZU7|A2A3W1|D3YV76|G3UYQ0	Septin6	Septin-6	MOUSE	26	71.6	390.57	-0.001	-0.139	-0.02	0.016	0.038	-0.013	-0.071	0.057	0.470272	0.999706
E9Q3V6	E9Q3V6|F6UKN5	Septin2	Septin-2	MOUSE	24	72.8	362.81	0.006	-0.127	0.056	0.029	-0.066	-0.102	-0.112	0.042	0.378106	0.999706
D3Z1S1	D3Z1S1	Septin2	Septin-2 (Fragment)	MOUSE	13	87.5	209.09	0.307	-0.613	-0.813	-0.464	0.053	0.802	0.966	0.504	0.995531	0.999706
A0A1W2P6J7	A0A1W2P6J7|Q8C650|A0A0R4J233|A0A1W2P866	Septin10	Septin	MOUSE	11	32.5	152.38	0.026	0.216	0.158	0.168	-0.098	-0.118	-0.161	-0.012	0.80181	0.999706
P80317	P80317|Q61390|B1AT05	Cct6a	T-complex protein 1 subunit zeta	MOUSE	35	77.7	566.16	-0.083	-0.083	0.03	0.036	0.09	-0.015	-0.018	0.128	0.552285	0.999706
A0A571BEL9	A0A571BEL9	Cct6a	T-complex protein 1 subunit zeta	MOUSE	32	72.3	516.23	-0.32	-0.082	-0.046	-0.08	0.199	0.039	-0.238	0.382	0.610445	0.999706
Q9Z268	Q9Z268|D3Z7V8	Rasal1	RasGAP-activating-like protein 1	MOUSE	41	56.1	565.93	-0.055	-0.103	0.021	0.065	0.008	-0.034	-0.127	0.077	0.420784	0.999706
P15116	P15116|D3YYT0	Cdh2	Cadherin-2	MOUSE	34	39.9	565.43	0.11	0.08	0.112	0.005	-0.05	-0.049	-0.083	-0.032	0.977527	0.999706
P39038	P39038|Q80ZV4	Cdh4	Cadherin-4	MOUSE	16	26.9	233.43	0.116	0.034	0.071	-0.104	0.085	0.056	0.107	0.125	0.596457	0.999706
Q5DTT2	Q5DTT2|A0A286YDE5	Psd	PH and SEC7 domain-containing protein 1	MOUSE	46	47.9	564.83	-0.035	-0.2	-0.059	-0.237	0.056	0.041	-0.021	-0.026	0.441624	0.999706
Q9Z277	Q9Z277	Baz1b	Tyrosine-protein kinase BAZ1B	MOUSE	47	32.4	564.69	0.024	1.243	0.154	0.283	-0.235	-0.285	-0.23	-0.14	0.50728	0.999706
Q922B2	Q922B2|Q8BJY7	Dars1	Aspartate--tRNA ligase, cytoplasmic	MOUSE	40	76	564.66	-0.04	0.023	0.021	0.081	0.002	-0.083	-0.105	-0.071	0.952033	0.999706
P63260	P63260|G3UZ07|G3UYG0|B1ATY1|E9Q606|F6WX90|V9GXQ2	Actg1	Actin, cytoplasmic 2	MOUSE	34	81.6	564.3	-0.04	0.049	0.148	0.114	0.078	-0.074	-0.066	0.084	0.730563	0.999706
E9Q5F4	E9Q5F4	Actb	Actin, cytoplasmic 1 (Fragment)	MOUSE	26	85.2	412.42	0.04	0.007	0.134	0.033	0.052	0.02	0.097	0.095	0.336939	0.999706
P68134	P68134|P68033|P62737|P63268|A0A494B9T3|D3YZY0|D3Z2K3|A0A1D5RM20|A0A0U1RQ96	Acta1	Actin, alpha skeletal muscle	MOUSE	20	44	287.99	-0.273	-0.059	0.032	0.09	-0.048	-0.309	-0.514	-0.084	0.480733	0.999706
Q8BFZ3	Q8BFZ3	Actbl2	Beta-actin-like protein 2	MOUSE	14	30.5	205.49	0.607	-0.241	-0.257	-0.113	-0.033	0.432	0.894	0.407	0.879344	0.999706
F8WGM8	F8WGM8	Actg1	Actin, cytoplasmic 2 (Fragment)	MOUSE	10	92.3	170.75	0.533	-0.47	-0.991	-0.478	-0.041	0.518	0.811	0.438	0.972184	0.999706
P63328	P63328	Ppp3ca	Serine/threonine-protein phosphatase 2B catalytic subunit alpha isoform	MOUSE	33	74.8	563.29	-0.029	-0.114	0.021	-0.034	0.021	0.041	0.033	0.071	0.888536	0.999706
P48453	P48453|E0CZ78|G3X8U7|E9Q6P2	Ppp3cb	Serine/threonine-protein phosphatase 2B catalytic subunit beta isoform	MOUSE	26	55.4	444.95	0.058	-0.099	0.064	-0.041	0.089	0.059	0.136	0.085	0.401961	0.999706
A0A2I3BPC5	A0A2I3BPC5|P48455	Ppp3cc	Serine/threonine-protein phosphatase	MOUSE	17	36.3	209.53	-0.002	-0.172	-0.095	-0.237	0.094	0.154	0.201	-0.003	0.497608	0.999706
Q8C754	Q8C754|G3UY33|A0A3Q4EBY1	Vps52	Vacuolar protein sorting-associated protein 52 homolog	MOUSE	37	58.5	563.11	0.007	-0.076	-0.062	-0.029	0.058	0.089	0.06	0.029	0.981675	0.999706
Q8VI75	Q8VI75|Q5U4C5|D6RES6|A0A2I3BRV3	Ipo4	Importin-4	MOUSE	40	39.9	563.03	-0.049	-0.042	-0.048	-0.084	0.043	0.045	0.069	0.049	0.994082	0.999706
O70481	O70481	Ubr1	E3 ubiquitin-protein ligase UBR1	MOUSE	41	28	562.18	0.001	-0.067	-0.076	-0.136	-0.037	0.071	0.035	-0.05	0.644704	0.999706
B2RUJ5	B2RUJ5	Apba1	Amyloid-beta A4 precursor protein-binding family A member 1	MOUSE	35	58.6	562.05	-0.056	-0.051	0.041	-0.075	0.001	-0.048	0.007	-0.055	0.556294	0.999706
P98084	P98084|A0A0U1RPM0|A0A0U1RPS9	Apba2	Amyloid-beta A4 precursor protein-binding family A member 2	MOUSE	18	38	275.42	0.131	0.126	0.249	0.086	-0.024	-0.104	-0.042	-0.024	0.749038	0.999706
Q8K4Z5	Q8K4Z5	Sf3a1	Splicing factor 3A subunit 1	MOUSE	41	55.3	562.03	0.036	-0.214	-0.038	-0.161	-0.007	0.004	0.039	-0.048	0.393901	0.999706
Q8BFR5	Q8BFR5|A0A0U1RNQ6|A0A0U1RPC4	Tufm	Elongation factor Tu, mitochondrial	MOUSE	33	72.5	561.87	-0.004	0.247	0.029	0.107	-0.008	-0.09	-0.243	-0.021	0.523431	0.999706
Q8BML9	Q8BML9|D3Z158|A0A140LHZ5|A0A140LIS6|A0A140LHB3|A0A0A6YY08|A0A140LIN2|A0A140LID3|A0A140LJH2|A0A140LJK5|A0A140LHJ3|A0A140LIR0|A0A140LIZ4|F6TDS3|A0A140LII8|A0A140LJH1|A0A140LHC3	Qars1	Glutamine--tRNA ligase	MOUSE	40	61.6	561.63	-0.08	-0.076	-0.124	-0.139	0.057	0.081	-0.002	-0.106	0.366716	0.999706
Q6PGC1	Q6PGC1|Q8BN72	Dhx29	ATP-dependent RNA helicase DHX29	MOUSE	43	35	561.61	-0.031	-0.08	-0.115	-0.154	0.03	0.016	0.032	-0.078	0.402653	0.999706
Q6P5D3	Q6P5D3	Dhx57	Putative ATP-dependent RNA helicase DHX57	MOUSE	39	31.3	517.1	-0.035	-0.031	-0.208	-0.109	0.02	0.054	0.012	-0.11	0.377466	0.999706
Q8VHK9	Q8VHK9	Dhx36	ATP-dependent DNA/RNA helicase DHX36	MOUSE	35	43.3	490.85	0.055	0.09	-0.115	-0.11	-0.013	0.002	-0.01	-0.104	0.265018	0.999706
P11531	P11531|A0A668KLA2|A2A9Z2|A2A9Z1|A0A1Q1PRS4	Dmd	Dystrophin	MOUSE	49	13.4	560.65	0.057	0.06	0.053	0.05	-0.018	0.007	0.043	0.005	0.909299	0.999706
E9Q6R7	E9Q6R7|Q61636|A0A1W2P7C0|A0A1W2P8G5|A0A1W2P8A5|A0A1W2P6L4	Utrn	Utrophin	MOUSE	42	12.7	449.84	0.009	-0.049	-0.031	-0.026	0.059	0.061	0.107	0.074	0.951781	0.999706
Q05AA6	Q05AA6|B1AV35	Drp2	Dystrophin-related protein 2	MOUSE	7	6.5	79.14	0.022	-0.069	-0.162	-0.095	-0.102	-0.071	0.072	-0.08	0.841111	0.999706
E9QLH4	E9QLH4|A0A1Y7VJX8|E9Q524	Trim9	E3 ubiquitin-protein ligase TRIM9	MOUSE	37	60.5	551.09	-0.061	-0.062	-0.097	-0.142	0.091	-0.009	0.021	-0.049	0.518426	0.999706
Q505D9	Q505D9	Trim67	Tripartite motif-containing protein 67	MOUSE	36	62.5	558.69	-0.046	-0.022	-0.079	-0.06	-0.045	-0.009	-0.039	-0.012	0.788224	0.999706
A0A6I8MWZ7	A0A6I8MWZ7	Trim9	E3 ubiquitin-protein ligase TRIM9	MOUSE	27	64.9	411.13	-0.018	-0.024	-0.008	-0.088	0.098	-0.009	0.072	-0.08	0.376485	0.999706
Q9Z1R2	Q9Z1R2|Q3UF95|G3UZT6|G3UYQ2|A0A1B0GX81|G3UXT8|G3UYZ0|G3V013|S4R183|S4R224	Bag6	Large proline-rich protein BAG6	MOUSE	37	40	558.41	0.055	-0.104	-0.052	-0.019	-0.028	0.005	0.002	0.047	0.853765	0.999706
A0A0R4J140	A0A0R4J140|Q5SW19|Z4YLI8	Cluh	Clustered mitochondria protein homolog	MOUSE	44	39.9	557.7	0.032	0.005	-0.089	0.035	0.062	0.126	0.114	0.045	0.867109	0.999706
E9Q9C2	E9Q9C2|E9Q9C1|E9Q9C0|E9Q9C4|E9QK41|Q8K4G5|E9Q9C7|E9Q030|E9Q9D2|E9Q9D1|E9Q9Q7	Ablim1	Actin-binding LIM protein 1	MOUSE	41	61.1	556.6	0	-0.247	-0.142	-0.186	0.051	0.067	0.075	-0.039	0.545097	0.999706
F6YHE5	F6YHE5	Ablim1	Actin-binding LIM protein 1 (Fragment)	MOUSE	17	64	226.33	0.172	0.327	0.165	0.2	-0.081	-0.226	-0.097	-0.019	0.956657	0.999706
P70699	P70699|A2AFL5|A2AFL3|F6R5R5|F6VEG4	Gaa	Lysosomal alpha-glucosidase	MOUSE	36	44.2	556.56	-0.09	-0.071	-0.015	-0.083	0.046	-0.001	-0.041	-0.024	0.917762	0.999706
P25206	P25206	Mcm3	DNA replication licensing factor MCM3	MOUSE	39	53.8	556.19	0.101	0.786	0.149	0.262	-0.238	-0.217	-0.184	0.012	0.548207	0.999706
Q9JLJ2	Q9JLJ2|Q3U367	Aldh9a1	4-trimethylaminobutyraldehyde dehydrogenase	MOUSE	34	84.4	555.89	-0.178	0.01	0.033	0.147	-0.012	-0.193	-0.254	0.043	0.388095	0.999706
Q8CH18	Q8CH18|A0A1W2P765|A0A1W2P7Q7	Ccar1	Cell division cycle and apoptosis regulator protein 1	MOUSE	43	38.5	555.79	-0.154	-0.159	-0.13	-0.108	0.054	0.016	-0.069	-0.05	0.641437	0.999706
Q9Z1G3	Q9Z1G3|A0A2I3BPD0|A0A2I3BQD9	Atp6v1c1	V-type proton ATPase subunit C 1	MOUSE	35	87.1	555.14	-0.032	-0.214	-0.088	-0.044	0.061	0.018	0.071	0.171	0.44926	0.999706
Q99L60	Q99L60|D3Z5W3	Atp6v1c2	V-type proton ATPase subunit C 2	MOUSE	3	7.7	39.16	0.23	-0.028	-0.16	-0.15	-0.174	0.084	-0.025	-0.214	0.473217	0.999706
P39688	P39688|D3YZ57|D3YZA2|P08103|F6UND7|P14234|E9Q696|P06240|D3YVZ0	Fyn	Tyrosine-protein kinase Fyn	MOUSE	37	69.8	554.74	-0.01	0.051	0.096	0.087	0.028	-0.058	-0.14	-0.029	0.978332	0.999706
P05480	P05480	Src	Neuronal proto-oncogene tyrosine-protein kinase Src	MOUSE	30	60.3	444.32	-0.127	0.166	0.12	0.213	0.051	-0.23	-0.338	-0.029	0.797693	0.999706
Q04736	Q04736|A0A0J9YUV2	Yes1	Tyrosine-protein kinase Yes	MOUSE	29	54.5	393.38	-0.085	0.09	0.06	0.078	0.105	-0.094	-0.221	0.033	0.825453	0.999706
Q8K2C7	Q8K2C7|A0A1W2P6Z8	Os9	Protein OS-9	MOUSE	41	66	554.59	0.001	-0.094	0.029	-0.073	-0.028	-0.007	-0.064	-0.01	0.91826	0.999706
A0A338P6F7	A0A338P6F7|O89026|G5E843|A0A338P6U2	Robo1	Roundabout homolog 1 (Fragment)	MOUSE	45	31.1	554.36	0.094	-0.004	0.012	-0.228	-0.022	-0.036	-0.043	-0.171	0.0577954	0.999706
E9Q6A0	E9Q6A0|Q19AB2|A0A338P6D2|E9PYK2|A0A338P6R3	Robo2	Roundabout homolog 2	MOUSE	37	32.4	500.25	0.199	0.194	0.012	0	-0.288	-0.153	-0.203	-0.293	0.647745	0.999706
A0A2I3BR72	A0A2I3BR72|Q7TPD3|A0A2I3BQB9	Robo2	Roundabout homolog 2	MOUSE	37	29.5	495.12	0.075	0.162	-0.04	-0.061	-0.048	-0.134	0.147	-0.227	0.531571	0.999706
O88342	O88342|A0A0J9YU05	Wdr1	WD repeat-containing protein 1	MOUSE	34	76.5	554.16	-0.086	-0.147	0.014	-0.008	0.026	-0.079	-0.153	-0.007	0.583738	0.999706
Q9WUA2	Q9WUA2|A0A087WPV4|A0A087WS80|A0A087WQ15	Farsb	Phenylalanine--tRNA ligase beta subunit	MOUSE	38	73.3	554.1	-0.269	-0.13	-0.212	-0.076	0.114	-0.018	-0.189	-0.074	0.443323	0.999706
Q8BWF0	Q8BWF0	Aldh5a1	Succinate-semialdehyde dehydrogenase, mitochondrial	MOUSE	33	75.9	552.6	-0.162	0.242	0.086	0.174	0.029	-0.127	-0.338	-0.058	0.71888	0.999706
Q8CFX3	Q8CFX3	Pcdh1	Protocadherin 1	MOUSE	37	42.8	552.27	0.125	-0.028	0.039	-0.12	-0.009	-0.018	0.019	-0.007	0.558098	0.999706
F7BJK1	F7BJK1	Pcdh1	Protocadherin 1 (Fragment)	MOUSE	37	42.3	540.54	0.111	-0.146	0.016	-0.296	0.089	0.068	0.109	0	0.203648	0.999706
E0CXD4	E0CXD4	Pcdh1	Protocadherin 1	MOUSE	16	65	265.87	0.167	0.045	0.117	-0.039	0.182	0.147	0.209	0.043	0.0526347	0.999706
Q99MU3	Q99MU3	Adar	Double-stranded RNA-specific adenosine deaminase	MOUSE	42	37.8	551.52	-0.272	-0.292	-0.186	-0.337	0.222	0.21	0.133	-0.089	0.564571	0.999706
O09012	O09012|D3Z600	Pex5	Peroxisomal targeting signal 1 receptor	MOUSE	33	73.2	550.56	-0.065	-0.063	0.054	-0.023	0.071	0.067	-0.036	-0.016	0.996209	0.999706
Q3U0V1	Q3U0V1|A0A3B2WCD8|A0A3B2W465	Khsrp	Far upstream element-binding protein 2	MOUSE	37	59.7	550.15	-0.1	-0.119	-0.227	-0.058	0.094	0.114	-0.043	-0.111	0.492017	0.999706
Q3TUE1	Q3TUE1|A0A0G2JGW9|Q3UUU2|A0A0G2JFY5|Q91WJ8|A0A0G2JG00|A0A0G2JFK2|A0A0G2JE55|A0A0G2JG96|A0A0G2JGT1|A0A0G2JGV9	Fubp1	Far upstream element-binding protein 1	MOUSE	34	62.9	460.7	-0.037	-0.199	-0.189	-0.045	-0.023	0.009	-0.006	-0.03	0.635615	0.999706
A2AJ72	A2AJ72|Q3TIX6|A0A0A6YVV5|A0A0A6YY39|F7AM43|A2AJ71|A0A0A6YX76|F6W2V3|A0A0A6YW42	Fubp3	Far upstream element (FUSE)-binding protein 3	MOUSE	32	59.9	397.63	0.085	-0.011	0.012	0.029	-0.043	0.009	0.082	0.036	0.926741	0.999706
Q91WG4	Q91WG4	Elp2	Elongator complex protein 2	MOUSE	36	56.4	550.12	0.057	0.03	-0.017	0.007	-0.013	0.032	0.003	0.065	0.922165	0.999706
Q8C7X2	Q8C7X2|Z4YJW0|A0A1Y7VP81	Emc1	ER membrane protein complex subunit 1	MOUSE	34	43	549.22	0.015	0.382	0.074	0.12	-0.056	-0.024	-0.159	-0.152	0.35939	0.999706
A2AQW2	A2AQW2|E9PXE6|Q6ZPF4|D3Z7A7	Fmnl2	Formin-like protein 2	MOUSE	47	40	549.13	0.07	0.024	0.04	-0.035	0.035	0.063	0.105	0.061	0.717511	0.999706
A2APV2	A2APV2|F8VPR2	Fmnl2	Formin-like protein 2	MOUSE	45	38.1	525.36	-0.423	-0.045	-0.368	-0.085	-0.202	0.117	0.176	-0.183	0.244881	0.999706
A2AB60	A2AB60|G3UWI1	Fmnl1	Formin-like protein 1	MOUSE	33	29.8	380.98	-0.002	-0.227	-0.028	-0.07	0.123	0.076	0.064	0.182	0.609515	0.999706
A0A1W2P6X3	A0A1W2P6X3|Q9JL26	Fmnl1	Formin-like protein 1	MOUSE	32	28.6	359.44	0.191	0.009	0.152	0.181	-0.362	-0.215	-0.166	-0.042	0.700735	0.999706
Q6P5B5	Q6P5B5|Q9WVR4	Fxr2	Fragile X mental retardation syndrome-related protein 2	MOUSE	38	66.3	548.85	-0.031	-0.091	-0.113	-0.262	0.055	0.097	0.055	-0.015	0.389072	0.999706
Q61584	Q61584|A0A0G2JEP0|A0A0H2UH27|A0A0G2JGL6	Fxr1	Fragile X mental retardation syndrome-related protein 1	MOUSE	38	54.9	518.47	-0.052	-0.126	-0.172	-0.223	0.085	0.11	-0.002	-0.066	0.273283	0.999706
E9QAT0	E9QAT0|P35922|Q6AXB7|E9QAS8	Fmr1	Synaptic functional regulator FMR1	MOUSE	35	61.7	519.82	-0.143	-0.242	-0.189	-0.043	0.17	-0.113	-0.138	0.033	0.151017	0.999706
E9QNF5	E9QNF5|D3Z6U8	Fmr1	Synaptic functional regulator FMR1	MOUSE	33	55.4	481.81	0.044	-0.325	-0.096	-0.199	0.165	-0.066	-0.005	-0.018	0.0584721	0.999706
Q8BKX6	Q8BKX6|J3QMR1|J3QPA7	Smg1	Serine/threonine-protein kinase SMG1	MOUSE	48	14.3	548.68	0.067	0.05	-0.006	0.107	-0.011	0.023	0.133	0.144	0.461562	0.999706
Q8C483	Q8C483|P26638|A2AFS0|A2AFS1	Sars	Seryl-tRNA synthetase	MOUSE	38	68.8	548.58	-0.118	-0.162	-0.081	-0.114	0.113	0.007	-0.076	0.075	0.751798	0.999706
P24527	P24527	Lta4h	Leukotriene A-4 hydrolase	MOUSE	38	71	548.45	0.075	-0.231	-0.021	0.023	0.025	0.116	0.093	0.08	0.800107	0.999706
Q99MR6	Q99MR6|A0A0G2JDF8|A0A0G2JG65|A0A0G2JDN3|A0A0G2JDF1|A0A1Y7VNN4	Srrt	Serrate RNA effector molecule homolog	MOUSE	45	44.1	548.11	-0.092	0.073	-0.044	-0.03	-0.078	-0.032	-0.082	-0.089	0.403973	0.999706
D3Z6I8	D3Z6I8|D3YVR0	Tpm3	Tropomyosin alpha-3 chain	MOUSE	41	80.5	547.84	0.022	-0.337	-0.083	-0.094	0.143	0.126	0.184	0.192	0.586422	0.999706
E9Q7Q3	E9Q7Q3|P21107|A0A0R4J1P2	Tpm3	Tropomyosin alpha-3 chain	MOUSE	39	79.8	537.07	-0.111	-0.236	0.143	-0.1	0.052	0.171	0.15	0.25	0.562747	0.999706
D3Z2H9	D3Z2H9|G5E8R1|E9Q5J9|E9Q454|F8WID5|B7ZNL3|A2AIM4|S4R2U0|A2AIM5|S4R261	Tpm3-rs7	Tropomyosin 3, related sequence 7	MOUSE	35	70.9	479.41	0.059	-0.253	-0.013	-0.116	0.083	0.106	0.113	0.156	0.706258	0.999706
P58771	P58771|Q8BSH3	Tpm1	Tropomyosin alpha-1 chain	MOUSE	34	69.3	454.18	-0.073	-0.342	-0.148	-0.133	-0.119	0	-0.071	0.07	0.485735	0.999706
E9Q453	E9Q453|G5E8R2	Tpm1	Tropomyosin alpha-1 chain	MOUSE	33	72.6	443.13	0.148	-0.173	-0.129	-0.274	0.012	0.165	0.068	0.092	0.791773	0.999706
Q6IRU2	Q6IRU2|A0A571BEU1	Tpm4	Tropomyosin alpha-4 chain	MOUSE	26	70.1	323.46	-0.055	-0.269	-0.125	-0.229	0.069	0.131	0.169	0.155	0.93339	0.999706
Q8R1B4	Q8R1B4|M0QWV3	Eif3c	Eukaryotic translation initiation factor 3 subunit C	MOUSE	41	42.2	547.6	-0.109	-0.202	-0.272	-0.286	0.117	0.133	0.066	-0.113	0.310364	0.999706
P51830	P51830|E9Q706	Adcy9	Adenylate cyclase type 9	MOUSE	37	34.5	547.47	0.056	-0.06	0.013	0.01	0.01	0.027	0.081	0.01	0.84254	0.999706
Q9DBR7	Q9DBR7	Ppp1r12a	Protein phosphatase 1 regulatory subunit 12A	MOUSE	41	46.4	546.79	-0.08	-0.323	-0.183	-0.22	0.094	0.141	0.062	0.043	0.822806	0.999706
Q8BG95	Q8BG95|A6H644|A0A571BGD8	Ppp1r12b	Protein phosphatase 1 regulatory subunit 12B	MOUSE	29	32.9	377.55	-0.127	-0.284	-0.22	-0.186	0.065	0.118	0.085	0.083	0.918742	0.999706
A0A1W2P750	A0A1W2P750	Ppp1r12a	Protein phosphatase 1 regulatory subunit 12A (Fragment)	MOUSE	22	42.8	271.01	-0.354	-0.703	-0.071	-0.812	-0.212	0.102	-0.037	-0.407	0.085612	0.999706
B9EKR1	B9EKR1|B2RXS8|A0A0J9YVD2	Ptprz1	Receptor-type tyrosine-protein phosphatase zeta	MOUSE	39	19.9	546.67	-0.062	-0.081	-0.086	-0.072	-0.022	0.06	0.051	-0.019	0.924997	0.999706
O08539	O08539|Q6P1B9|A0A3Q4EBK4|A0A3Q4EBR8	Bin1	Myc box-dependent-interacting protein 1	MOUSE	36	62.9	545.97	0.016	-0.165	-0.054	-0.095	0.029	0.024	0.053	0.044	0.751369	0.999706
P54823	P54823	Ddx6	Probable ATP-dependent RNA helicase DDX6	MOUSE	33	81.9	545.63	-0.066	-0.048	-0.141	-0.073	0.051	0.101	0.04	0.015	0.833727	0.999706
Q9D8N0	Q9D8N0	Eef1g	Elongation factor 1-gamma	MOUSE	34	80.5	545.41	-0.067	-0.139	-0.086	-0.073	0.094	0.026	-0.089	-0.045	0.59665	0.999706
O08917	O08917|G3UYU4|G3UWW8|G3UZZ5|G3XA73	Flot1	Flotillin-1	MOUSE	35	84.1	545.21	0.028	0.023	0.021	0.031	0.043	0.01	-0.046	0.063	0.824729	0.999706
Q8JZN5	Q8JZN5|A0A0G2JF25|A0A0G2JDY4	Acad9	Complex I assembly factor ACAD9, mitochondrial	MOUSE	39	69.2	545.2	0.048	0.252	-0.022	0.108	0.038	-0.003	-0.043	-0.003	0.434262	0.999706
F8WJ93	F8WJ93|A0A3Q4EHV9|Q3UMY5	Eml4	Echinoderm microtubule-associated protein-like 4	MOUSE	37	42.8	545.02	0.003	-0.188	0.018	-0.086	-0.021	0.036	0.032	0.015	0.749784	0.999706
A7ISP9	A7ISP9|A0A0R4J1G7|A0A0R4J0H0	Eml4	EMAP-like protein 4	MOUSE	36	42.7	534.98	0.152	-0.145	-0.051	-0.101	0.08	0.252	0.105	0.103	0.831052	0.999706
Q8CJG0	Q8CJG0	Ago2	Protein argonaute-2	MOUSE	39	53	544.89	-0.054	-0.175	-0.122	-0.118	0.003	0.053	0.019	0.032	0.899454	0.999706
A0A6I8MX18	A0A6I8MX18|Q8CJG1|H3BJ70|A3KFX6|H3BL59|A3KFX7	Ago1	Protein argonaute-1	MOUSE	34	43.2	459.41	-0.029	-0.119	-0.002	-0.046	0.056	0.054	0.005	0.065	0.963768	0.999706
Q8CJF9	Q8CJF9	Ago3	Protein argonaute-3	MOUSE	15	18.6	180.88	-0.101	-0.113	-0.004	0.022	0.083	-0.026	0.191	0.17	0.230618	0.999706
Q4KMM3	Q4KMM3|E9Q0A7|A0A2R8W6N3|A0A2R8VI09|A0A2R8VHT3|B1H3M0|A0A2R8VKF8|A0A2R8VHF5	Oxr1	Oxidation resistance protein 1	MOUSE	38	50.1	544.63	-0.036	-0.136	-0.035	-0.105	0.041	0.022	-0.026	-0.057	0.641757	0.999706
Q5SWP3	Q5SWP3|H3BKC6	Nacad	NAC-alpha domain-containing protein 1	MOUSE	37	35.7	544.41	0.041	-0.212	-0.124	-0.336	0.017	0.081	0.019	-0.199	0.0837324	0.999706
Q3UDE2	Q3UDE2|F2Z423	Ttll12	Tubulin--tyrosine ligase-like protein 12	MOUSE	37	68.8	543.12	-0.047	0.095	0.083	0.131	0.024	-0.061	-0.09	0.048	0.715818	0.999706
Q9JKF1	Q9JKF1|A0A0U1RNG5|F8VQ29|A0A0U1RPU3|Q3UQP1	Iqgap1	Ras GTPase-activating-like protein IQGAP1	MOUSE	42	31.2	542.36	0.056	0.183	0.081	0.153	-0.107	-0.086	-0.026	0.014	0.695994	0.999706
Q3UQ44	Q3UQ44	Iqgap2	Ras GTPase-activating-like protein IQGAP2	MOUSE	39	28.6	451.78	0.05	0.062	0.035	-0.075	0.042	0.051	0.189	0.043	0.432918	0.999706
Q7TNL5	Q7TNL5|Q91V89	Ppp2r5d	Serine/threonine-protein phosphatase 2A 56 kDa regulatory subunit	MOUSE	36	67	541.82	0.024	-0.128	-0.083	-0.017	0.034	0.043	0.048	0.059	0.842357	0.999706
Q61151	Q61151|Q3UZJ4|A0A1W2P7D8|A0A1W2P838	Ppp2r5e	Serine/threonine-protein phosphatase 2A 56 kDa regulatory subunit epsilon isoform	MOUSE	30	58.8	432.04	-0.025	-0.17	-0.127	-0.104	0.077	0.08	0.079	0.131	0.916874	0.999706
Q60996	Q60996	Ppp2r5c	Serine/threonine-protein phosphatase 2A 56 kDa regulatory subunit gamma isoform	MOUSE	27	59.9	401.11	0.006	-0.161	-0.068	-0.037	0.093	0.09	0.061	0.13	0.789442	0.999706
Q6PD28	Q6PD28	Ppp2r5b	Serine/threonine-protein phosphatase 2A 56 kDa regulatory subunit beta isoform	MOUSE	23	48.4	345.57	-0.026	-0.152	-0.089	-0.049	0.029	0.061	0.115	0.07	0.939056	0.999706
A0A1Y7VIR0	A0A1Y7VIR0|A0A1Y7VJC8	Ppp2r5c	Serine/threonine-protein phosphatase 2A 56 kDa regulatory subunit gamma isoform (Fragment)	MOUSE	17	57.2	242.65	0.292	-0.096	-0.093	-0.025	0.023	0.002	0.13	0.089	0.530349	0.999706
Q61207	Q61207|J3QPG5|K3W4L3	Psap	Prosaposin	MOUSE	33	72.5	541.66	0.066	-0.082	0.013	0.044	-0.081	-0.045	-0.072	0.022	0.704716	0.999706
Q8BFQ1	Q8BFQ1|E9PZ00	Psap	Prosaposin	MOUSE	33	72.3	540.36	0.018	-0.107	-0.114	0.039	-0.048	-0.014	-0.05	-0.046	0.67	0.999706
Q03517	Q03517|Q4W8U9	Scg2	Secretogranin-2	MOUSE	38	68.5	541.53	-0.68	-0.81	-0.399	-0.467	0.826	0.853	0.664	0.536	0.996992	0.999706
Q8K4B0	Q8K4B0|F8WHY8|E9PX23	Mta1	Metastasis-associated protein MTA1	MOUSE	44	66.5	541.47	-0.009	0.084	0.022	-0.026	-0.086	-0.001	-0.017	-0.128	0.399208	0.999706
Q9R190	Q9R190	Mta2	Metastasis-associated protein MTA2	MOUSE	35	44	419.76	0.031	0.508	0.026	0.074	-0.174	-0.157	-0.127	-0.173	0.541862	0.999706
Q924K8	Q924K8|Q3UII8|Q3U3A7|E9Q794|H3BLE1|H3BIY7	Mta3	Metastasis-associated protein MTA3	MOUSE	22	36.5	261.72	-0.062	0.07	0.092	0.112	0.059	-0.049	-0.125	0.048	0.828094	0.999706
Q6ZQA6	Q6ZQA6|A0A0A6YX40	Igsf3	Immunoglobulin superfamily member 3	MOUSE	39	38.1	541.35	0.019	0.021	0.081	-0.146	0.006	0.039	-0.015	-0.138	0.108504	0.999706
P17182	P17182|Q6PHC1|B0QZL1|B1ARR7|J3QPZ9|B1ARR6|A0A0N4SUW8	Eno1	Alpha-enolase	MOUSE	32	85.4	541.18	-0.115	-0.23	-0.002	0.038	0.073	0.051	-0.023	0.173	0.409167	0.999706
P17183	P17183|A0A0N4SUX5|D3Z6E4|D3Z2S4|D3YVD3|Q5SX59|A0A0N4SUI6|Q5SX60|Q5SX61	Eno2	Gamma-enolase	MOUSE	30	84.1	503.02	-0.061	-0.267	-0.027	-0.005	0.103	0.046	-0.001	0.289	0.289471	0.999706
Q80WQ2	Q80WQ2|A0A1D5RLY2|A0A1D5RLN5	Vac14	Protein VAC14 homolog	MOUSE	37	59.3	540.92	-0.024	-0.077	-0.056	-0.034	-0.092	-0.024	-0.103	-0.047	0.672841	0.999706
F8VQ70	F8VQ70|B2RXS3|Q8BIZ8	Scaper	S phase cyclin A-associated protein in the ER	MOUSE	46	37.7	539.54	-0.069	-0.172	-0.266	-0.325	0.101	0.131	0.004	-0.205	0.0801569	0.999706
Q8R420	Q8R420|Q6AXE3|E9PX95	Abca3	Phospholipid-transporting ATPase ABCA3	MOUSE	38	29.6	538.66	-0.06	0.174	0.08	-0.012	0.005	-0.149	-0.301	-0.233	0.715531	0.999706
Q68ED2	Q68ED2|G5E8D5|G3UZU3|G3UYV0|G3UY08	Grm7	Metabotropic glutamate receptor 7	MOUSE	40	46.7	537.54	0.023	-0.088	-0.024	-0.191	0.072	0.076	0.024	-0.098	0.150677	0.999706
A2AE27	A2AE27|Q9DBT5	Ampd2	AMP deaminase	MOUSE	42	52.9	537.52	-0.06	-0.259	-0.117	-0.122	0.082	0.097	0.157	0.128	0.854491	0.999706
A2AG50	A2AG50|A2AG51|Q8C0A6	Map7d2	MAP7 domain-containing protein 2	MOUSE	44	55.4	537.23	0.049	-0.189	-0.013	-0.142	0.076	0.058	0.095	-0.039	0.327666	0.999706
Q9JHK4	Q9JHK4|A0A2K6EDL0	Rabggta	Geranylgeranyl transferase type-2 subunit alpha	MOUSE	35	73.8	536.54	0.062	-0.079	0.082	0.056	0.02	0.006	0.009	0.1	0.486935	0.999706
P35486	P35486	Pdha1	Pyruvate dehydrogenase E1 component subunit alpha, somatic form, mitochondrial	MOUSE	35	87.6	536.12	-0.061	0.327	0.062	0.196	-0.055	-0.165	-0.312	-0.078	0.612131	0.999706
P46096	P46096	Syt1	Synaptotagmin-1	MOUSE	33	67.9	535.82	0.003	-0.025	0.086	0.024	0.017	-0.044	-0.093	-0.025	0.972109	0.999706
Q9R0N5	Q9R0N5	Syt5	Synaptotagmin-5	MOUSE	20	50.7	269.07	-0.01	0.032	0.123	0.23	-0.086	-0.101	-0.105	0.188	0.0641882	0.999706
A0A0R4J2C2	A0A0R4J2C2|P46097	Syt2	Synaptotagmin	MOUSE	15	30.3	200.38	0.152	0.207	0.143	0.02	-0.162	-0.149	-0.211	-0.196	0.850178	0.999706
B2RR83	B2RR83|A0A0J9YV44	Ythdc2	3'-5' RNA helicase YTHDC2	MOUSE	48	38.7	535.76	-0.042	-0.06	-0.11	-0.162	0.016	0.048	0.031	0.018	0.806256	0.999706
Q02819	Q02819|A0A1C7CYU3|A0A1B0GR41|A0A1B0GR92|A0A1B0GS16|A0A1B0GT83	Nucb1	Nucleobindin-1	MOUSE	36	72.1	535.51	0.035	-0.186	0.046	-0.022	0.126	-0.073	-0.021	0.145	0.162278	0.999706
Q6ZQ82	Q6ZQ82|E9QAQ3|F6T836|F6XTB7|D3Z1X5|F6Q7M1|F7D661	Arhgap26	Rho GTPase-activating protein 26	MOUSE	37	54.2	535.45	0.047	-0.1	0.077	-0.02	0.09	0.068	0.068	-0.009	0.529032	0.999706
Q9CZU3	Q9CZU3	Mtrex	Exosome RNA helicase MTR4	MOUSE	41	42.6	535.35	-0.028	0.122	-0.012	-0.031	-0.021	0.009	-0.054	-0.093	0.390051	0.999706
Q3UHL1	Q3UHL1|A0A0A6YW88|A0A0A6YXI7|A0A0A6YW08	Camkv	CaM kinase-like vesicle-associated protein	MOUSE	32	78.1	534.42	0.093	-0.129	-0.075	-0.206	0.019	0.078	0.021	-0.102	0.239788	0.999706
A0A338P6P6	A0A338P6P6|D4AFX6|Q6ZQK5|A0A2R8W6H4	Acap2	Arf-GAP with coiled-coil, ANK repeat and PH domain-containing protein 2	MOUSE	37	55.7	534.38	0.03	-0.086	-0.031	0.005	0.034	-0.003	-0.047	0.006	0.679237	0.999706
Q6NXL5	Q6NXL5|A2ADA6	Acap3	ArfGAP with coiled-coil, ankyrin repeat and PH domains 3	MOUSE	32	49.2	452.89	-0.101	0.051	0.037	0.078	0.102	-0.018	-0.091	0.08	0.796417	0.999706
A0A5F8MPT4	A0A5F8MPT4	Acap2	Arf-GAP with coiled-coil, ANK repeat and PH domain-containing protein 2 (Fragment)	MOUSE	3	48.4	45.4	-0.081	0.082	-0.383	-0.22	-0.404	-0.096	-0.122	-0.752	0.111894	0.999706
Q68FL0	Q68FL0|G5E8Y0|A0A3Q4L326	Slc8a1	Na(+)/Ca(2+)-exchange protein 1	MOUSE	35	38.9	528.03	0.057	0.045	0.041	-0.044	-0.018	-0.007	-0.01	-0.049	0.764587	0.999706
G3X9J1	G3X9J1|A0A3Q4EBU5|P70414	Slc8a1	Na(+)/Ca(2+)-exchange protein 1	MOUSE	34	38.6	534.09	-0.207	0.618	0.074	0.344	-0.342	-0.021	-0.154	-0.045	0.0650532	0.999706
E9PX50	E9PX50|S4R2P9	Slc8a3	Sodium/calcium exchanger 3	MOUSE	12	13.9	140.84	0.181	0.102	0.058	-0.02	0.046	0.017	0.125	0.098	0.581247	0.999706
S4R2V4	S4R2V4	Slc8a3	Sodium/calcium exchanger 3 (Fragment)	MOUSE	5	29.5	57.17	-0.056	-0.108	-0.015	-0.096	0.176	0.256	0.261	0.291	0.778964	0.999706
A0A2R8VKG2	A0A2R8VKG2|A0A2R8VHF1|D3YZ21|F6ZGR6	D430041D05Rik	RIKEN cDNA D430041D05 gene	MOUSE	37	20.2	534.06	0.001	-0.1	-0.049	-0.095	-0.04	-0.029	-0.098	0.027	0.752761	0.999706
Q9EQZ6	Q9EQZ6|A2ASW8|Q8C0Q9|F7BXV7	Rapgef4	Rap guanine nucleotide exchange factor 4	MOUSE	38	40.3	533.38	0	-0.124	0.026	-0.034	0.08	0.053	0.005	0.066	0.867049	0.999706
Q8VCC8	Q8VCC8|E9Q2E5|H3BK39|H3BKA8	Rapgef3	Rap guanine nucleotide exchange factor 3	MOUSE	4	3.7	33.51	-0.076	0.009	-0.09	-0.076	-0.005	0.13	-0.06	-0.189	0.175513	0.999706
Q8CG48	Q8CG48|B1AWH6	Smc2	Structural maintenance of chromosomes protein 2	MOUSE	41	42.8	533.23	0.055	0.617	0.204	0.283	-0.187	-0.177	-0.165	-0.069	0.582718	0.999706
Q91XL9	Q91XL9|Q3V156|A0A3Q4EI24|A0A3Q4EG54|D3Z754|A0A3Q4L2S6|D3Z7I9|D3YZ66|Q8K2D2|A0A3Q4EG41|D6RDE4	Osbpl1a	Oxysterol-binding protein-related protein 1	MOUSE	41	47.3	533.17	-0.146	-0.086	0.037	0.068	0.04	-0.052	-0.085	-0.006	0.763295	0.999706
Q8BMA6	Q8BMA6|A2AAN2	Srp68	Signal recognition particle subunit SRP68	MOUSE	40	66	532.62	-0.115	-0.017	-0.217	-0.131	0.079	0.095	0.021	-0.051	0.408732	0.999706
Q80ZF8	Q80ZF8|Q68FL1|Q8BJ13	Adgrb3	Adhesion G protein-coupled receptor B3	MOUSE	40	31	532.58	0.134	0.021	0.025	-0.148	-0.08	-0.027	-0.014	-0.096	0.41412	0.999706
A0A1B0GSR5	A0A1B0GSR5|A0A0R4J0W7|Q5XJV6|A0A1B0GRD8|A0A1B0GSP4|A0A1B0GSU1|A0A1B0GR61	Lmtk3	Serine/threonine-protein kinase LMTK3	MOUSE	36	33.2	532.41	0.003	-0.092	-0.05	-0.371	0.066	0.102	0.034	-0.216	0.0145184	0.999706
A0A3B2WCD2	A0A3B2WCD2	Lmtk3	Serine/threonine-protein kinase LMTK3	MOUSE	27	22.8	378.98	0.031	0.022	-0.146	-0.314	-0.075	0.005	0.029	-0.247	0.0392013	0.999706
Q9DBR1	Q9DBR1	Xrn2	5'-3' exoribonuclease 2	MOUSE	37	46.7	531.77	0.015	-0.026	-0.011	-0.084	-0.037	-0.023	-0.06	-0.11	0.485249	0.999706
Q8BVQ9	Q8BVQ9|P46471	Psmc2	26S proteasome AAA-ATPase subunit RPT1	MOUSE	38	72.4	531.65	-0.026	-0.018	0.06	0.105	0.048	-0.04	-0.099	0.07	0.555397	0.999706
Q569Z5	Q569Z5|F8WHR6|A0A2R8VHK2	Ddx46	Probable ATP-dependent RNA helicase DDX46	MOUSE	42	44.4	531.57	-0.076	0.181	-0.049	0.09	0.011	0.031	-0.06	-0.004	0.315192	0.999706
Q9D394	Q9D394	Rufy3	Protein RUFY3	MOUSE	35	71.4	530.81	0.084	-0.118	0.064	-0.007	0.03	0.006	0.012	0.038	0.566262	0.999706
A0A0G2JFT8	A0A0G2JFT8	Rufy3	Protein RUFY3	MOUSE	34	44	470.86	0.131	-0.041	-0.122	0.029	-0.158	-0.087	0.046	-0.028	0.957521	0.999706
Q8R4C2	Q8R4C2|D6RET4|D3Z7T9	Rufy2	RUN and FYVE domain-containing protein 2	MOUSE	33	46.2	410.39	-0.017	-0.139	-0.026	-0.156	-0.007	-0.087	0.001	-0.045	0.247744	0.999706
Q8BR30	Q8BR30|D3Z4D2	Rufy2	RUN and FYVE domain-containing protein 2	MOUSE	30	59.7	373	0.199	0.019	0.147	0.188	-0.233	0.103	0.233	-0.127	0.636191	0.999706
Q99MK8	Q99MK8|Q7TS64|F6QY34|F6Y9P3|F7AEX1	Grk2	Beta-adrenergic receptor kinase 1	MOUSE	39	58.7	530.71	-0.093	-0.142	-0.045	-0.067	0.126	0.107	0.024	0.135	0.971314	0.999706
Q3UYH7	Q3UYH7|Q8BVT9|Q8BX71|A0A0G2JEW1	Adrbk2	Beta-adrenergic receptor kinase 2	MOUSE	30	46.3	372.47	-0.036	-0.159	0.01	-0.029	0.058	0.073	0.039	0.163	0.745776	0.999706
Q91VW5	Q91VW5|A0A1D5RLV4|A0A1D5RME8|A0A1D5RLC6|A0A1D5RL95|A0A1D5RLH4|A0A1D5RM19	Golga4	Golgin subfamily A member 4	MOUSE	50	22.4	530.44	0.174	-0.071	0.137	0.03	-0.053	-0.026	0.083	-0.021	0.397265	0.999706
Q9CZN7	Q9CZN7	Shmt2	Serine hydroxymethyltransferase, mitochondrial	MOUSE	37	76.9	529.88	-0.12	0.589	0.056	0.231	-0.072	-0.218	-0.25	-0.126	0.639617	0.999706
P50431	P50431|G3UZ26|G3UYY1|G3UZZ9	Shmt1	Serine hydroxymethyltransferase, cytosolic	MOUSE	14	29.7	169.58	0.001	0.268	0.047	0.227	-0.15	-0.224	-0.247	0.031	0.439331	0.999706
E9Q3G8	E9Q3G8|A0A286YE24|A0A286YCP2|A0A286YCY7	Nup153	Nucleoporin 153	MOUSE	40	36.2	529.67	0.01	-0.152	-0.059	-0.197	-0.018	0.032	0.046	-0.093	0.309762	0.999706
P55096	P55096|A0A0G2JDI9|A0A0G2JGA4	Abcd3	ATP-binding cassette sub-family D member 3	MOUSE	39	59	529.64	0.09	0.181	0.072	0.037	-0.099	-0.005	-0.028	-0.055	0.665703	0.999706
Q8BRF7	Q8BRF7|A0A1W2P6R7	Scfd1	Sec1 family domain-containing protein 1	MOUSE	33	63.8	529.48	-0.057	-0.092	0.009	-0.017	-0.049	-0.036	-0.187	-0.067	0.760392	0.999706
G5E884	G5E884|O88643|S4R2K7|A0A0U1RQ87	Pak1	Non-specific serine/threonine protein kinase	MOUSE	34	66.7	529.29	-0.06	-0.181	-0.038	-0.071	0.029	-0.021	-0.087	0.079	0.583518	0.999706
Q61036	Q61036|A3KGC5|A3KGC4|A3KGC2	Pak3	Serine/threonine-protein kinase PAK 3	MOUSE	34	66.7	526.61	-0.062	-0.083	-0.014	-0.035	0.073	0.095	0.074	0.075	0.988414	0.999706
Q8CIN4	Q8CIN4	Pak2	Serine/threonine-protein kinase PAK 2	MOUSE	32	74	512.75	0.099	-0.055	0.096	0.09	-0.045	0.006	0.028	0.011	0.716288	0.999706
A3KGC3	A3KGC3	Pak3	Non-specific serine/threonine protein kinase (Fragment)	MOUSE	10	71.6	144.54	0.286	0.877	1.345	0.82	0.007	-0.388	-0.679	0.169	0.82491	0.999706
Q3UMB9	Q3UMB9|A0A1W2P6V9	Washc4	WASH complex subunit 4	MOUSE	41	36.9	529.11	0.055	0.055	-0.142	0.02	-0.01	0.045	0.073	0.013	0.871374	0.999706
A0A0R4J0J8	A0A0R4J0J8|Q2KN98|A0A1W2P785	Specc1l	Cytospin-A	MOUSE	44	40.8	528.7	0.105	-0.111	-0.015	-0.019	0.012	0.13	0.168	0.071	0.886802	0.999706
Q8CGF7	Q8CGF7|A0A494B9W7|A0A494BA28|Q3B807	Tcerg1	Transcription elongation regulator 1	MOUSE	45	35.1	528.49	-0.099	-0.13	-0.126	-0.142	-0.017	0.016	0.025	-0.067	0.578296	0.999706
Q6KAR6	Q6KAR6|A0A1Y7VKY4|A0A1Y7VP30	Exoc3	Exocyst complex component 3	MOUSE	40	57.6	527.98	-0.035	-0.133	-0.086	-0.056	-0.029	0.029	-0.009	0.008	0.902813	0.999706
G3X9B1	G3X9B1|A0A1Y7VNI1|A0A1Y7VNG8	Heatr1	HEAT repeat-containing protein 1	MOUSE	48	23.2	527.77	0.012	0.24	0	-0.022	-0.038	0.026	0.058	-0.007	0.391727	0.999706
Q8K596	Q8K596	Slc8a2	Sodium/calcium exchanger 2	MOUSE	36	38.9	527.65	0.087	0.021	0.049	0.016	-0.006	-0.011	-0.033	0.043	0.944178	0.999706
Q9WV18	Q9WV18|Q3TWR2|G3UXR6	Gabbr1	Gamma-aminobutyric acid type B receptor subunit 1	MOUSE	41	43.4	527.5	0.03	0.035	-0.041	-0.046	0.042	0.022	-0.073	-0.002	0.517231	0.999706
Q8BMF4	Q8BMF4	Dlat	Dihydrolipoyllysine-residue acetyltransferase component of pyruvate dehydrogenase complex, mitochondrial	MOUSE	32	58.5	527.44	-0.1	0.252	0.127	0.189	-0.035	-0.117	-0.255	-0.089	0.779753	0.999706
A0A0A6YX18	A0A0A6YX18|Q8BVE3|A0A0A6YWP6|A0A0A6YVU0|A0A0A6YW86	Atp6v1h	V-type proton ATPase subunit H	MOUSE	29	74.6	527.4	-0.014	-0.189	-0.05	-0.044	0.066	0.08	0.031	0.105	0.835507	0.999706
P84091	P84091|Q3TWV4|A0A338P6T4|A0A338P798	Ap2m1	AP-2 complex subunit mu	MOUSE	36	80.4	527.15	0.013	-0.083	-0.031	-0.057	0.063	0.03	0.076	0.07	0.875445	0.999706
Q8BWQ6	Q8BWQ6|I1E4X5|D3YW19|D3YW20|F6RR19|H3BJE8	Vps35l	VPS35 endosomal protein-sorting factor-like	MOUSE	39	44.2	526.78	-0.005	-0.016	-0.073	0.032	0.026	0.058	0.111	0.081	0.920575	0.999706
F8VQ87	F8VQ87|A0A087WQN7|P97789|A0A087WNV6	Xrn1	5'-3' exoribonuclease 1	MOUSE	40	28.2	526.75	-0.042	-0.122	-0.145	-0.118	0.026	0.056	0.086	0.015	0.949998	0.999706
Q810A7	Q810A7	Ddx42	ATP-dependent RNA helicase DDX42	MOUSE	40	52.9	526.08	-0.073	-0.169	-0.065	-0.076	0	0.024	-0.017	-0.123	0.665103	0.999706
O55201	O55201|A0A140LJ34	Supt5h	Transcription elongation factor SPT5	MOUSE	39	38.7	525.87	0.002	0.207	-0.047	0.045	-0.025	-0.036	-0.043	-0.031	0.605254	0.999706
P70211	P70211	Dcc	Netrin receptor DCC	MOUSE	38	36.4	525.4	0.093	0.023	0.091	0.019	-0.048	-0.041	-0.126	-0.079	0.959335	0.999706
Q3UHC1	Q3UHC1|A1L338|Q3UGX8|A0A5F8MPI9|Q91ZZ2|F6ZDE5	Rapgef1	Rap guanine nucleotide exchange factor (GEF) 1	MOUSE	36	36.6	524.38	0.014	-0.071	0.008	0.044	0	-0.033	0.051	0.059	0.498743	0.999706
F8VQH0	F8VQH0|Q4JIM5|A0A087WQB7	Abl2	Tyrosine-protein kinase	MOUSE	41	41.4	524.19	0.025	-0.165	-0.094	-0.079	0.041	0.049	0.082	0.012	0.806264	0.999706
B2RQ57	B2RQ57	Abl2	Tyrosine-protein kinase	MOUSE	38	41.3	479	-0.013	-0.142	-0.174	-0.333	-0.154	-0.085	-0.031	-0.344	0.0263412	0.999706
P00520	P00520	Abl1	Tyrosine-protein kinase ABL1	MOUSE	27	24.9	297.92	-0.004	-0.063	-0.116	-0.141	0.081	-0.028	0.202	0.003	0.67632	0.999706
G3UWQ2	G3UWQ2	Abl2	Tyrosine-protein kinase ABL2 (Fragment)	MOUSE	3	43.1	62.33	-0.391	-0.082	-0.543	-0.056	0.023	0.31	-0.135	-0.229	0.166297	0.999706
P09411	P09411|S4R2M7|P09041	Pgk1	Phosphoglycerate kinase 1	MOUSE	32	80	523.9	-0.096	-0.211	0.019	0.07	0.115	0.05	-0.041	0.243	0.282524	0.999706
P26443	P26443	Glud1	Glutamate dehydrogenase 1, mitochondrial	MOUSE	33	69.3	523.61	-0.209	0.266	0.026	0.247	-0.045	-0.186	-0.244	-0.037	0.531313	0.999706
F7CFA5	F7CFA5	Glud1	Glutamate dehydrogenase 1, mitochondrial (Fragment)	MOUSE	6	65.9	109.68	0.446	-0.476	-0.175	-0.13	-0.19	0.003	0.408	0.323	0.695662	0.999706
P50544	P50544|B1AR28	Acadvl	Very long-chain specific acyl-CoA dehydrogenase, mitochondrial	MOUSE	35	66.1	523.22	-0.134	0.247	0.024	0.2	0.004	-0.087	-0.144	-0.07	0.672263	0.999706
Q8CCJ3	Q8CCJ3	Ufl1	E3 UFM1-protein ligase 1	MOUSE	37	51.3	522.95	0.028	-0.077	-0.003	-0.054	0.007	-0.007	-0.024	-0.001	0.862014	0.999706
Q80UJ7	Q80UJ7|A0A1D5RLG3	Rab3gap1	Rab3 GTPase-activating protein catalytic subunit	MOUSE	39	49.9	522.91	-0.009	-0.085	-0.057	-0.051	0.013	0.109	0.118	0.06	0.992264	0.999706
Q9Z2C9	Q9Z2C9|G3V027|I6L9A6|G3UYZ2|G3UYB7	Mtmr7	Myotubularin-related protein 7	MOUSE	34	57.8	522.75	0.092	-0.066	0	0.01	-0.047	0.002	0	-0.005	0.951801	0.999706
Q99PG2	Q99PG2	Ogfr	Opioid growth factor receptor	MOUSE	36	65.7	522.63	0.021	-0.019	-0.008	0.03	-0.023	-0.018	-0.015	0.023	0.937728	0.999706
Q6ZQ18	Q6ZQ18|A0A1W2P7T9|A0A1W2P7E0	Efr3b	Protein EFR3 homolog B	MOUSE	36	52.8	522.58	-0.003	0.045	0.007	-0.03	-0.008	-0.022	-0.055	-0.084	0.779574	0.999706
A0A1D5RLL3	A0A1D5RLL3|Q8BG67|Q8BWC5|A0A2I3BR57	Efr3a	Protein EFR3 homolog A	MOUSE	11	15.3	139.96	-0.012	0.032	-0.012	0.003	0.055	0.033	-0.065	0.003	0.796318	0.999706
Q6NVF0	Q6NVF0|F7CAV3|Q7TPR1	Ocrl	Inositol polyphosphate 5-phosphatase OCRL	MOUSE	39	47.8	522.45	-0.051	-0.098	-0.05	-0.021	0.066	0	-0.019	-0.037	0.868951	0.999706
Q8CFQ3	Q8CFQ3|A2AQA7	Aqr	RNA helicase aquarius	MOUSE	39	32.8	522.39	-0.012	0.191	-0.027	-0.05	-0.052	0.037	0.044	-0.003	0.36353	0.999706
Q3TLI0	Q3TLI0|A0A1W2P8E9|A0A1W2P717	Trappc10	Trafficking protein particle complex subunit 10	MOUSE	38	34.4	521.24	0.036	-0.127	-0.077	-0.074	0.058	0.099	0.084	0.021	0.898946	0.999706
E9PXE2	E9PXE2|E9PXE1|G3UX72|E9QPM7|Q64096|E9PY12|E9PY13|E9Q863|G3UXP9|D3YUF4|D3YUF3|G3UYM8|F6VR53|F6WPM5|F7BZ65|F6UKC6|F6ZFQ8|A0A571BEU5	Mcf2l	Guanine nucleotide exchange factor DBS	MOUSE	42	43.1	520.54	0.082	-0.024	0.11	0.074	-0.049	-0.042	-0.023	0.02	0.731827	0.999706
Q99JY9	Q99JY9|A0A087WRA1|A0A087WQ14|A0A087WP86|A0A087WS98|A0A087WQ83|A0A087WPR6	Actr3	Actin-related protein 3	MOUSE	31	79.1	520.5	-0.126	-0.19	0.055	0.031	0.065	-0.052	-0.102	0.017	0.60926	0.999706
Q641P0	Q641P0	Actr3b	Actin-related protein 3B	MOUSE	29	79.4	450.97	-0.082	-0.186	0.004	-0.114	0.085	0.033	-0.029	-0.045	0.714885	0.999706
Q61548	Q61548|E9QLK9|A0A5F8MPL3|E9QQ05|E9Q9A3|Q3TWS4|A0A087WSI9	Snap91	Clathrin coat assembly protein AP180	MOUSE	32	38.8	520.22	0.037	-0.217	-0.109	-0.076	0.024	0.048	0.092	0.024	0.763514	0.999706
Q7M6Y3	Q7M6Y3|A0A140LHG9	Picalm	Phosphatidylinositol-binding clathrin assembly protein	MOUSE	24	41.9	367.71	-0.042	-0.136	-0.171	-0.201	0.109	0.119	0.308	0.204	0.967908	0.999706
A0A140LHQ8	A0A140LHQ8	Picalm	Phosphatidylinositol-binding clathrin assembly protein (Fragment)	MOUSE	18	33.3	256.7	-0.226	-0.375	-0.075	-0.574	-0.011	0.175	0.198	-0.041	0.237306	0.999706
A0A1L1SUR7	A0A1L1SUR7	Picalm	Phosphatidylinositol-binding clathrin assembly protein (Fragment)	MOUSE	12	34.1	181.91	-0.291	-0.498	-0.504	-0.818	0.128	0.312	-0.253	-0.242	0.105089	0.999706
Q80ZX0	Q80ZX0|F6VJC5|F6YIN5	Sec24b	Sec24-related gene family, member B (S. cerevisiae)	MOUSE	34	36.3	519.87	-0.09	-0.106	-0.137	-0.044	0.064	0.039	-0.055	-0.024	0.655826	0.999706
Q9DCD0	Q9DCD0	Pgd	6-phosphogluconate dehydrogenase, decarboxylating	MOUSE	34	78.2	519.32	-0.002	-0.187	0.003	0.034	0.019	0.049	0.014	0.151	0.454163	0.999706
G3X9Y5	G3X9Y5|E9Q735|E9Q442|Q8VDS1|A0A1L1SUX2|A0A1L1SRI7|A0A1L1SV76|D3YXR7|D6RGN7|A0A1L1SV29	Ube4a	Ubiquitin conjugation factor E4 A	MOUSE	39	44.5	519.24	0.081	-0.042	-0.081	-0.1	0.001	0.05	0.042	-0.057	0.579998	0.999706
P29758	P29758	Oat	Ornithine aminotransferase, mitochondrial	MOUSE	34	80.8	519.02	-0.302	0.171	-0.019	0.173	0.094	-0.142	-0.285	-0.05	0.708352	0.999706
G5E8R4	G5E8R4|Q922D4|A0A286YE88|A0A286YCG3|A0A286YD27	Ppp6r3	Serine/threonine-protein phosphatase 6 regulatory subunit 3	MOUSE	33	50.5	495.93	0.032	-0.101	-0.097	-0.142	-0.001	0.075	0.049	0.01	0.855921	0.999706
A0A5F8MQ25	A0A5F8MQ25|G3X9K4|Q8R3Q2|Q8C400	Ppp6r2	Serine/threonine-protein phosphatase 6 regulatory subunit 2	MOUSE	32	47.4	518.49	0.044	0.01	-0.057	-0.033	0.053	0.156	0.04	0.065	0.624983	0.999706
Q7TSI3	Q7TSI3|A0A0U1RNI2|A0A0U1RPT0|A0A0U1RQ86	Ppp6r1	Serine/threonine-protein phosphatase 6 regulatory subunit 1	MOUSE	25	42.9	380.12	-0.026	-0.03	-0.049	0.021	-0.025	0.055	0.062	0.007	0.967727	0.999706
E9PYI7	E9PYI7|Q3UPW3|E0CZD8	Lmo7	LIM domain only 7	MOUSE	51	34.3	517.89	0.004	-0.215	-0.11	-0.35	0.038	0.037	0.041	-0.081	0.169682	0.999706
E9PYF4	E9PYF4|F6VG99|F6TFN2|A0A5F8MPW2	Lmo7	LIM domain only 7	MOUSE	50	29.1	518.16	0.379	0.175	0.156	0.065	0.062	-0.084	0.638	0.151	0.267077	0.999706
Q3U0M1	Q3U0M1|E9Q3T8	Trappc9	Trafficking protein particle complex subunit 9	MOUSE	39	39.1	518	0.014	-0.127	-0.037	-0.071	0.067	0.051	0.094	0.043	0.792757	0.999706
Q8C8N2	Q8C8N2|A0A0N4SVJ6|A0A0N4SUW0	Scai	Protein SCAI	MOUSE	37	59.9	517.37	-0.054	-0.103	-0.151	-0.074	-0.003	-0.015	0.005	0.053	0.737604	0.999706
B0R0E3	B0R0E3	Scai	Protein SCAI (Fragment)	MOUSE	2	96.2	35.77	0.09	-0.062	0.186	0.087	0.153	-0.113	-0.057	0.193	0.194092	0.999706
Q04447	Q04447	Ckb	Creatine kinase B-type	MOUSE	29	85.8	516.8	0.04	0.106	0.21	0.246	-0.037	-0.174	-0.201	0.06	0.528237	0.999706
P07310	P07310|A0A0J9YKD4	Ckm	Creatine kinase M-type	MOUSE	6	13.6	64.78	-0.156	-0.148	-0.03	0.136	-0.029	-0.238	-0.296	-0.346	0.632678	0.999706
P63005	P63005|Q5SW16	Pafah1b1	Platelet-activating factor acetylhydrolase IB subunit beta	MOUSE	35	78.5	516.68	-0.046	-0.162	0.026	0.017	0.041	-0.038	-0.015	0.106	0.310519	0.999706
Q8JZP2	Q8JZP2|D3Z620	Syn3	Synapsin-3	MOUSE	34	75.4	515.42	0.005	-0.131	0.041	0.027	-0.013	-0.032	0.001	0.059	0.420499	0.999706
Q9ERL9	Q9ERL9	Gucy1a1	Guanylate cyclase soluble subunit alpha-1	MOUSE	37	55.4	514.92	-0.085	-0.218	-0.069	-0.077	0.023	0.057	0	0.046	0.860077	0.999706
Q8BG32	Q8BG32|G3UYH2|G3UWW7|G3UXL5|G3UYL3|G3UYI4|G3UYL8|G3UX15|G3UZ33|G3UWV7|G3UX67|G3UZ28	Psmd11	26S proteasome non-ATPase regulatory subunit 11	MOUSE	33	77.7	514.86	-0.005	-0.054	-0.01	0.031	0.029	0.038	-0.008	0.086	0.769679	0.999706
P62196	P62196|Q8K1K2	Psmc5	26S proteasome regulatory subunit 8	MOUSE	37	81.5	514.21	0.004	-0.074	0.041	0.101	0.039	-0.016	-0.028	0.085	0.347495	0.999706
P62192	P62192	Psmc1	26S proteasome regulatory subunit 4	MOUSE	36	74.5	508.95	0.023	0.035	-0.047	0.038	-0.024	-0.009	-0.038	0.02	0.781185	0.999706
Q9D8E6	Q9D8E6	Rpl4	60S ribosomal protein L4	MOUSE	36	62.2	513.73	-0.081	0.125	-0.214	-0.118	0.13	0.077	-0.034	-0.031	0.181556	0.999706
B2RXC1	B2RXC1	Trappc11	Trafficking protein particle complex subunit 11	MOUSE	38	39.7	513.16	0.059	-0.059	-0.064	-0.038	0.04	0.107	0.043	0.056	0.914788	0.999706
A7TU71	A7TU71|A2ALU4|Q1W617	Shroom2	Protein Shroom2	MOUSE	41	29.9	513.13	0.009	-0.248	-0.118	-0.139	-0.006	0.031	0.117	0.015	0.693328	0.999706
Q9QXN0	Q9QXN0|E9QMY5|A0A286YDQ8|E9Q6I3|A0A0R4J1H8	Shroom3	Protein Shroom3	MOUSE	6	2.5	53.07	0.024	-0.078	0.007	0.18	0.364	0.242	0.488	0.176	0.377569	0.999706
A0A0A6YW06	A0A0A6YW06|J3QNM3|E9QKQ9|E9QKR1|A0A0A6YXC8|A0A0A6YVZ6	Enah	Protein enabled homolog	MOUSE	35	46.3	512.41	0.054	-0.089	0.056	-0.024	0.077	0.035	0.072	0.015	0.484245	0.999706
E9QLZ9	E9QLZ9|Q03173	Enah	Protein enabled homolog	MOUSE	35	43.1	492.85	0.174	-0.042	-0.017	-0.216	-0.091	0.049	0.394	-0.232	0.195858	0.999706
P70429	P70429|F8WJB9|E9PVP4|A0A1Y7VJA2|A0A1Y7VNI5	Evl	Ena/VASP-like protein	MOUSE	30	62.3	431.24	-0.058	-0.284	-0.145	-0.152	0.03	0.087	0.006	-0.054	0.704718	0.999706
Q3UZV7	Q3UZV7|E9PUJ3	Elapor2	Endosome/lysosome-associated apoptosis and autophagy regulator family member 2	MOUSE	34	47.1	512.32	-0.053	-0.053	-0.133	-0.278	0.012	0.014	-0.073	-0.136	0.0564445	0.999706
Q8K3G9	Q8K3G9|D3Z340|H3BJX0|D6RFR7|H3BL43	Appl2	DCC-interacting protein 13-beta	MOUSE	37	73.4	512.32	0.106	0.014	0.156	0.147	-0.087	-0.168	-0.16	0	0.611123	0.999706
D3YXK0	D3YXK0	Jakmip2	Janus kinase and microtubule-interacting protein 2	MOUSE	41	46.2	512.24	0.084	-0.053	0.045	-0.011	-0.034	-0.014	-0.032	-0.055	0.861279	0.999706
D3Z4U5	D3Z4U5|G3UYZ9|D3Z555|G3UY22|G3UXP1|G3UXP3|A0A140LIJ5	Jakmip1	Janus kinase and microtubule-interacting protein 1	MOUSE	38	43.9	447.89	0.104	-0.09	0.156	0.108	0.204	0.103	0.158	0.203	0.0974666	0.999706
Q8BVL9	Q8BVL9|A0A1D5RLA4	Jakmip1	Janus kinase and microtubule-interacting protein 1	MOUSE	36	49.3	419.97	0.073	-0.221	-0.118	-0.125	-0.104	0.157	0.107	-0.11	0.880275	0.999706
Q5DTN8	Q5DTN8|E9Q7K7	Jakmip3	Janus kinase and microtubule-interacting protein 3	MOUSE	20	22.2	234.09	0.097	-0.128	-0.038	-0.103	-0.006	0.08	0.098	0.085	0.936042	0.999706
Q61644	Q61644|A0A384DVB1|A0A338P6K4	Pacsin1	Protein kinase C and casein kinase substrate in neurons protein 1	MOUSE	34	81.8	512.07	-0.051	-0.196	-0.071	-0.054	0.078	0.059	0.116	0.213	0.600286	0.999706
Q8R2P8	Q8R2P8	Kars	Lysine--tRNA ligase	MOUSE	35	62	509.63	-0.12	-0.082	-0.065	-0.095	0.036	0.03	-0.172	-0.08	0.542298	0.999706
Q99MN1	Q99MN1	Kars1	Lysine--tRNA ligase	MOUSE	34	65.2	511.6	0.127	-0.224	-0.006	-0.125	-0.102	0.102	-0.127	-0.008	0.931147	0.999706
Q91VM5	Q91VM5|A0A2I3BRL8|A2AFI4|A0A2I3BQC0	Rbmxl1	RNA binding motif protein, X-linked-like-1	MOUSE	46	73.1	511.41	-0.013	-0.277	-0.097	-0.206	0.068	0.047	0.086	-0.057	0.350566	0.999706
Q9WV02	Q9WV02|A2AFI3|S4R1F6|Q9DAE2	Rbmx	RNA-binding motif protein, X chromosome	MOUSE	43	70.5	490.59	0.128	-0.241	0.029	-0.215	0.341	0.07	0.135	0.267	0.226486	0.999706
Q9CVB6	Q9CVB6|D3YXG6|A0A087WRT2	Arpc2	Actin-related protein 2/3 complex subunit 2	MOUSE	33	85	510	-0.241	-0.177	-0.032	0.026	0.15	-0.109	-0.232	-0.013	0.654742	0.999706
Q8C2Q3	Q8C2Q3|E9QL13|J3QN51|J3QPT3	Rbm14	RNA-binding protein 14	MOUSE	36	56.6	509.6	-0.097	-0.077	-0.079	-0.16	0.001	-0.045	-0.109	-0.148	0.192346	0.999706
F7BGR7	F7BGR7|Q8C7Q4|B0LM42|F6TBN8|A0A494BB78|A0A494B9C0|S4R1A6|Q5CZX8|A0A494BAP6	Gm21992	Predicted gene 21992	MOUSE	25	51.1	348.6	0.328	0.373	0.161	0.197	0.022	-0.008	-0.151	-0.322	0.312714	0.999706
Q8VE92	Q8VE92|A0A494B9W4	Rbm4b	RNA-binding protein 4B	MOUSE	16	43.4	208.8	-0.125	0.262	-0.14	-0.006	-0.052	0.097	-0.006	-0.284	0.129433	0.999706
Q8R016	Q8R016|E9PZH4|E9QA53|E9Q6V3|E9PYU0	Blmh	Bleomycin hydrolase	MOUSE	34	75.6	509.03	-0.017	-0.162	0.031	0.026	0.041	0.03	-0.003	0.126	0.507091	0.999706
E9PY26	E9PY26	Blmh	Bleomycin hydrolase (Fragment)	MOUSE	17	86.5	243.31	0.931	-0.29	-0.279	-0.213	0.082	0.728	1.246	0.507	0.790506	0.999706
Q9WU60	Q9WU60	Atrn	Attractin	MOUSE	38	29	508.89	0.081	0.104	0.086	-0.043	-0.081	-0.067	-0.167	-0.183	0.51736	0.999706
Q8CH72	Q8CH72|A2AGS1|A2AGS0	Trim32	E3 ubiquitin-protein ligase TRIM32	MOUSE	35	61	508.72	-0.074	-0.067	-0.027	-0.068	0.02	0.025	-0.027	-0.026	0.936045	0.999706
Q9D554	Q9D554	Sf3a3	Splicing factor 3A subunit 3	MOUSE	33	69	508.53	-0.095	-0.169	0.008	-0.144	-0.017	-0.03	-0.074	-0.099	0.423809	0.999706
Q9D8W5	Q9D8W5|B1AT36|Q3TRH2	Psmd12	26S proteasome non-ATPase regulatory subunit 12	MOUSE	34	70.1	508.29	0.068	-0.088	-0.162	-0.07	0.004	0.117	0.141	0.089	0.991622	0.999706
Q8C0D5	Q8C0D5|D3Z1V3|A0A140LHB7	Efl1	Elongation factor-like GTPase 1	MOUSE	37	41.2	508.23	-0.011	-0.03	-0.014	-0.014	0.014	0.015	0.006	0.079	0.956885	0.999706
F8VQC1	F8VQC1|E9Q740	Srp72	Signal recognition particle subunit SRP72	MOUSE	36	57.8	508.22	-0.176	0.078	-0.265	-0.131	0.042	0.064	-0.097	-0.076	0.105226	0.999706
Q9QYE6	Q9QYE6|A0A1Y7VMD3	Golga5	Golgin subfamily A member 5	MOUSE	40	58.4	508.09	0.037	-0.185	-0.103	-0.251	0.04	0.135	0.137	-0.076	0.365732	0.999706
Q9Z2I9	Q9Z2I9	Sucla2	Succinate--CoA ligase [ADP-forming] subunit beta, mitochondrial	MOUSE	31	70.8	507.99	-0.06	0.3	0.094	0.228	-0.042	-0.161	-0.272	-0.06	0.687543	0.999706
Q91Y86	Q91Y86|Q7TSJ7|A6P3E4|G3X8U9|D3Z1Z4|A0A2I3BPL3	Mapk8	Mitogen-activated protein kinase 8	MOUSE	34	78.3	507.95	-0.023	-0.017	0.042	0.028	-0.001	-0.008	-0.078	-0.04	0.998034	0.999706
E9QN59	E9QN59|A0A5F8MP75|Q8C9D4|Q3TQZ7|Q61831|Q80W80|A0A0G2JGL2|A0A0G2JG69|A0A0G2JEJ8	Mapk10	Mitogen-activated protein kinase	MOUSE	32	59.5	473.74	0.007	-0.076	-0.069	0.012	0.003	0.053	0.083	0.088	0.910046	0.999706
Q9WTU6	Q9WTU6	Mapk9	Mitogen-activated protein kinase 9	MOUSE	23	55.5	321.23	-0.139	-0.12	-0.098	0.001	-0.062	0.034	-0.01	-0.03	0.603605	0.999706
A2A484	A2A484|A2A482|A2A483|Q3U1M7|Q3UH28|E9Q8D1|A2A485|A2A480|A2A481|A2A486	Zmynd8	Zinc finger, MYND-type-containing 8	MOUSE	40	35.7	507.49	0.02	-0.158	-0.045	-0.131	-0.004	0.014	0.055	-0.069	0.446973	0.999706
Q99L45	Q99L45|E0CXJ3	Eif2s2	Eukaryotic translation initiation factor 2 subunit 2	MOUSE	32	72.5	507.18	-0.058	-0.162	-0.096	-0.145	0.064	0.088	0.053	0.018	0.890018	0.999706
P16858	P16858|A0A1D5RLD8|S4R257|P10096|S4R1N5|V9GXA7	Gapdh	Glyceraldehyde-3-phosphate dehydrogenase	MOUSE	33	95.1	507.04	-0.134	-0.091	0.082	0.154	0.159	-0.043	-0.1	0.215	0.299916	0.999706
A0A0A0MQF6	A0A0A0MQF6	Gapdh	Glyceraldehyde-3-phosphate dehydrogenase	MOUSE	33	89.4	505.3	-0.754	-0.48	-0.781	-0.095	0.683	0.016	0.103	-0.981	0.76828	0.999706
S4R1W1	S4R1W1	Gm3839	Glyceraldehyde-3-phosphate dehydrogenase	MOUSE	32	94.2	486.3	-0.122	-0.091	0.048	0.115	0.046	-0.07	-0.048	0.107	0.25155	0.999706
S4R1W8	S4R1W8	Gapdh	Glyceraldehyde-3-phosphate dehydrogenase (Fragment)	MOUSE	8	67.2	111.44	0.769	-5.781	-2.88	-1.67	-0.43	1.38	1.837	0.991	0.742783	0.999706
V9GX06	V9GX06	Gm11214	Predicted gene 11214 (Fragment)	MOUSE	5	21.3	80.77	0.985	-1.158	-1.394	-1.165	-0.06	1.257	1.976	0.775	0.967409	0.999706
Q9R0L6	Q9R0L6|A0A1B0GT33	Pcm1	Pericentriolar material 1 protein	MOUSE	43	21.4	507.02	0.052	-0.158	-0.159	-0.152	-0.031	0.078	-0.028	-0.116	0.446269	0.999706
Q99LF4	Q99LF4	Rtcb	RNA-splicing ligase RtcB homolog	MOUSE	32	76.2	506.72	-0.158	0.018	-0.137	-0.03	0.045	-0.012	-0.165	-0.045	0.335584	0.999706
Q8BWT1	Q8BWT1|A0A494B9J2	Acaa2	3-ketoacyl-CoA thiolase, mitochondrial	MOUSE	30	91.4	506.01	-0.125	0.248	0.035	0.236	-0.05	-0.173	-0.267	-0.056	0.559501	0.999706
Q8BNA6	Q8BNA6|E9QK16	Fat3	Protocadherin Fat 3	MOUSE	42	12.1	505.77	0.03	-0.044	-0.012	-0.225	0.065	0.094	0.069	-0.094	0.0871333	0.999706
A0A1L1SQU7	A0A1L1SQU7|A0A087WRT4|F2Z4A3	Fat1	FAT atypical cadherin 1	MOUSE	35	8.6	401.97	0.078	0.092	0.04	-0.03	0.005	0.03	0	-0.043	0.53273	0.999706
Q9WUT3	Q9WUT3|A0A338P701	Rps6ka2	Ribosomal protein S6 kinase alpha-2	MOUSE	38	56	505.19	0.096	-0.045	-0.046	0.088	-0.083	-0.065	-0.075	0.068	0.352776	0.999706
P18654	P18654|B1AXN9|B1AXP0|B1AXN5|B1AXN8|F6UG16|B2GVN8|B1B0X1|A2CEE8|B1AXN7	Rps6ka3	Ribosomal protein S6 kinase alpha-3	MOUSE	33	49.8	450.62	-0.042	-0.067	-0.069	-0.026	0.03	-0.022	0.023	-0.008	0.934793	0.999706
F6Q8A4	F6Q8A4|F6RQA2|Q505N6|P18653|E9PWV3|G3UZI3	Rps6ka1	Non-specific serine/threonine protein kinase (Fragment)	MOUSE	24	35.3	326.49	-0.051	-0.155	-0.087	-0.012	-0.021	0.001	-0.024	0.026	0.636073	0.999706
E9QK39	E9QK39|A2CEE7|E9PUP0|Q7TPS0|A2CEE6|A2CEE5	Rps6ka6	Ribosomal protein S6 kinase	MOUSE	9	11.3	120.92	-0.055	-0.179	-0.286	-0.33	0.056	0.102	0.082	-0.218	0.134422	0.999706
Q641K1	Q641K1|F6ZCF0|E9PX07|E9PXA7|A0A286YDV2|E9Q3T5|Q8C1R2|E9Q878|E9Q352|E9Q2R5	Agtpbp1	Cytosolic carboxypeptidase 1	MOUSE	40	38.9	504.87	0.047	-0.079	-0.01	-0.05	0.047	0.088	0.025	-0.044	0.751568	0.999706
H3BKQ3	H3BKQ3|H3BL92|H3BJ67|H3BJ57|H3BJX1|A0A6I8MWZ4|H3BLD3	Evi5l	Ecotropic viral integration site 5-like	MOUSE	40	45	504.42	0.011	-0.089	-0.055	-0.124	0.029	0.083	0.061	0.035	0.920918	0.999706
E9QAU4	E9QAU4|A2AQ25|D3Z781|Q8BHR1|A0A5F8MPV1|B1AY49|B1AY50	Etl4	Enhancer trap locus 4	MOUSE	45	23.9	503.38	0.041	-0.149	-0.062	-0.26	0.012	-0.004	-0.019	-0.088	0.162827	0.999706
V9GX40	V9GX40|Q5SV85|V9GXD9|F6YUG5	Synrg	Synergin gamma	MOUSE	41	31.7	503.02	-0.021	-0.186	-0.04	-0.149	-0.011	0.023	0.024	-0.006	0.673587	0.999706
Q5XJY5	Q5XJY5	Arcn1	Coatomer subunit delta	MOUSE	33	62.8	502.23	-0.122	-0.102	-0.084	0.053	0.097	-0.064	-0.197	-0.078	0.527846	0.999706
Q3UHB1	Q3UHB1|A0A1W2P799	Nt5dc3	5'-nucleotidase domain-containing protein 3	MOUSE	33	60.4	502.14	-0.027	0	-0.063	0.036	0.031	0.087	0.001	0.028	0.750614	0.999706
Q8BG05	Q8BG05|A2AL12|A2AL13|V9GX38	Hnrnpa3	Heterogeneous nuclear ribonucleoprotein A3	MOUSE	37	59.6	501.2	0.016	-0.091	0.052	-0.061	0.048	0.016	0.047	-0.02	0.523873	0.999706
D3Z030	D3Z030|E9Q4H6	Carmil1	F-actin-uncapping protein LRRC16A	MOUSE	40	33.4	500.92	0.051	0.024	0.006	0.039	-0.031	0.009	0.063	0.02	0.967824	0.999706
Q6EDY6	Q6EDY6|F7AI27	Carmil1	F-actin-uncapping protein LRRC16A	MOUSE	40	32.7	497.82	0.019	0.023	0.049	0.107	-0.009	-0.083	-0.087	-0.039	0.892552	0.999706
Q3TUQ5	Q3TUQ5|O35691|A0A1W2P6S1	Pnn	Pinin	MOUSE	38	49.7	500.81	-0.049	-0.266	-0.067	-0.117	0.004	0.069	0.028	0.028	0.823371	0.999706
O54991	O54991	Cntnap1	Contactin-associated protein 1	MOUSE	39	34.8	500.49	0.02	0.024	0.029	-0.065	-0.012	0.004	0.022	0.027	0.957989	0.999706
Q6PHQ8	Q6PHQ8|F7A8R0|E9Q6K7|E9Q2U4|F6WYJ5|F6UFC8	Naa35	N-alpha-acetyltransferase 35, NatC auxiliary subunit	MOUSE	37	56	500.23	-0.012	0.027	-0.166	-0.061	0.072	0.116	0.085	0.046	0.67514	0.999706
Q9Z1N5	Q9Z1N5|G3UXI6	Ddx39b	Spliceosome RNA helicase Ddx39b	MOUSE	33	81.3	500.19	0.008	0.288	0.082	0.094	-0.056	-0.064	-0.12	-0.148	0.628955	0.999706
Q8VDW0	Q8VDW0|D6RHT5	Ddx39a	ATP-dependent RNA helicase DDX39A	MOUSE	26	58.7	353.32	0.076	0.526	0.193	0.181	-0.105	-0.083	-0.101	-0.141	0.511871	0.999706
Q8K0D5	Q8K0D5	Gfm1	Elongation factor G, mitochondrial	MOUSE	39	57.2	499.73	-0.23	0.129	-0.091	-0.051	0.164	0.058	-0.055	-0.019	0.675776	0.999706
Q80U72	Q80U72|D3YU97	Scrib	Protein scribble homolog	MOUSE	43	30.5	499.26	0.064	0.133	0.068	-0.002	-0.01	0.028	0.037	0.017	0.652694	0.999706
Q9JMA1	Q9JMA1|E9PYI8	Usp14	Ubiquitin carboxyl-terminal hydrolase 14	MOUSE	33	68.7	498.82	-0.106	-0.011	0.05	0.055	0.093	0.027	0.006	0.131	0.679382	0.999706
Q5KU39	Q5KU39	Vps41	Vacuolar protein sorting-associated protein 41 homolog	MOUSE	36	45.3	498.19	0.025	-0.014	0.106	0.056	0.001	0.011	-0.032	0.03	0.918096	0.999706
G3X8X7	G3X8X7|Q920Q4|A2BI90	Vps16	Vacuolar protein sorting-associated protein 16 homolog	MOUSE	38	47.5	498.11	-0.027	-0.054	-0.064	-0.028	0.01	0.024	-0.017	0.048	0.918512	0.999706
Q5SW75	Q5SW75|A0A0R4J2A0|A0A0A0MQJ2	Ssh2	Protein phosphatase Slingshot homolog 2	MOUSE	36	32	497.84	-0.039	-0.141	-0.076	-0.193	0.051	0.047	0.031	-0.075	0.325411	0.999706
Q76I79	Q76I79|F8WHT2	Ssh1	Protein phosphatase Slingshot homolog 1	MOUSE	11	13.3	134.92	-0.027	-0.008	0.126	0.202	-0.08	-0.279	-0.112	-0.045	0.292079	0.999706
P98156	P98156|Q91YY0|F8WGI9|F8WIN7|F6RKS4|E9Q643	Vldlr	Very low-density lipoprotein receptor	MOUSE	33	46.6	497.62	-0.051	-0.018	-0.105	-0.32	0.041	0.035	-0.07	-0.186	0.01955	0.999706
Q05BC3	Q05BC3|D3Z4J9|D6RII3	Eml1	Echinoderm microtubule-associated protein-like 1	MOUSE	35	46.1	497.27	0.065	-0.151	0.032	-0.039	0.018	-0.001	0.041	0.079	0.529665	0.999706
Q8CFE4	Q8CFE4|G5E8J9|Q80UY7	Scyl2	SCY1-like protein 2	MOUSE	34	50.9	497.23	0.001	-0.163	0	-0.023	-0.007	-0.006	-0.052	0.072	0.640524	0.999706
Q60634	Q60634	Flot2	Flotillin-2	MOUSE	33	74	496.33	0.033	0.056	0.079	-0.003	0.005	0.032	0.043	0.093	0.823801	0.999706
Q5SS83	Q5SS83	Flot2	Flotillin	MOUSE	32	71.4	477.58	-0.024	-0.036	0.074	-0.017	-0.088	-0.081	-0.106	0.07	0.760431	0.999706
P97311	P97311|Q3ULG5	Mcm6	DNA replication licensing factor MCM6	MOUSE	43	54.4	496.32	0.089	0.775	0.139	0.268	-0.207	-0.266	-0.188	-0.056	0.668826	0.999706
Q9WV34	Q9WV34	Mpp2	MAGUK p55 subfamily member 2	MOUSE	37	64.1	495.93	-0.036	0.049	0.042	-0.067	0.068	-0.111	-0.175	-0.092	0.774506	0.999706
Q9JLB0	Q9JLB0|E9PWC5|E9Q2R8	Mpp6	MAGUK p55 subfamily member 6	MOUSE	34	64.9	469.96	-0.075	0.006	0.018	0.029	0.026	-0.141	-0.151	-0.026	0.819708	0.999706
Q3UHQ6	Q3UHQ6|A0A2I3BRZ2|A0A2I3BQW4|A0A2I3BRW5|A0A2I3BRE4	Dop1b	Protein dopey-2	MOUSE	43	20.6	495.91	0.116	0.062	-0.032	0.078	-0.057	-0.03	0.037	-0.009	0.980793	0.999706
E9PZJ8	E9PZJ8|A0A1W2P6I6	Ascc3	Activating signal cointegrator 1 complex subunit 3	MOUSE	46	22.9	495.86	0.014	-0.034	-0.137	-0.116	0.057	0.104	0.106	-0.032	0.638001	0.999706
B9EJ80	B9EJ80	Pdzd8	PDZ domain-containing protein 8	MOUSE	39	37.3	495.49	-0.009	-0.025	0.022	-0.085	-0.005	-0.018	0.039	-0.007	0.753846	0.999706
Q8K3H0	Q8K3H0	Appl1	DCC-interacting protein 13-alpha	MOUSE	34	50.4	495.47	0.013	-0.155	-0.045	0.011	0.067	0.031	0.033	0.132	0.445717	0.999706
O88569	O88569|A0A0N4SUM2	Hnrnpa2b1	Heterogeneous nuclear ribonucleoproteins A2/B1	MOUSE	30	87.2	494.28	0.011	-0.107	0.147	-0.035	0.04	0.014	-0.037	0.085	0.819863	0.999706
Q5EBP8	Q5EBP8|V9GXF8	Hnrnpa1	Helix-destabilizing protein	MOUSE	29	69.9	453.23	-0.203	-0.729	-0.318	-0.257	-0.005	0.004	-0.316	-0.928	0.285673	0.999706
P49312	P49312	Hnrnpa1	Heterogeneous nuclear ribonucleoprotein A1	MOUSE	29	85.3	447.38	-0.17	-0.57	-0.557	-0.415	-0.055	-0.002	-0.404	-0.579	0.0466107	0.999706
Q9WTM5	Q9WTM5|A0A1B0GSR4|A0A1B0GRW3|A0A1B0GT54|A0A1B0GR89|A0A1B0GRT1	Ruvbl2	RuvB-like 2	MOUSE	32	79.2	493.88	-0.054	-0.173	0.001	-0.004	0.015	0.016	0.012	0.109	0.520442	0.999706
P97807	P97807|H3BKG7	Fh	Fumarate hydratase, mitochondrial	MOUSE	31	74.9	493.85	-0.162	0.106	0.062	0.157	-0.024	-0.127	-0.226	0.012	0.55501	0.999706
O88307	O88307	Sorl1	Sortilin-related receptor	MOUSE	40	19.9	493.52	-0.062	-0.04	-0.104	-0.272	0.095	0.069	-0.032	-0.182	0.0336986	0.999706
P48318	P48318|D3Z5S3|D3Z1L8|D3Z466	Gad1	Glutamate decarboxylase 1	MOUSE	32	73	493.15	0.116	-0.061	0.166	0.097	0.063	0.089	0.152	0.264	0.146544	0.999706
P48320	P48320	Gad2	Glutamate decarboxylase 2	MOUSE	32	65.2	485.59	-0.118	-0.241	-0.11	-0.133	0.108	0.111	0.087	0.212	0.899675	0.999706
P32921	P32921|E0CXQ4|E0CXX4	Wars1	Tryptophan--tRNA ligase, cytoplasmic	MOUSE	35	75	493.12	-0.153	-0.018	0.099	0.097	0.043	-0.19	-0.164	-0.05	0.805482	0.999706
A0A1Y7VL44	A0A1Y7VL44|E9Q6P5|A0A1Y7VLT4	Ttc7b	Tetratricopeptide repeat protein 7B	MOUSE	41	45.6	492.91	0.049	-0.097	-0.022	-0.044	0.005	0.066	0.044	0.056	0.980879	0.999706
Q569Z6	Q569Z6|Q8BZN7|F6YSQ2|F6YH92|F7AB07	Thrap3	Thyroid hormone receptor-associated protein 3	MOUSE	43	39.2	492.91	0.03	-0.155	-0.124	-0.159	-0.02	0.079	0.084	-0.06	0.700182	0.999706
Q8K019	Q8K019|F8WI22|A0A087WRN1|A0A087WQA0	Bclaf1	Bcl-2-associated transcription factor 1	MOUSE	37	36.6	472.24	0.029	-0.208	-0.049	-0.135	0.002	0.083	0.093	-0.016	0.732814	0.999706
Q9JLM4	Q9JLM4|B1AXS7|B1AXS6|B1AXS8|Q8CG95|B0R077|Q32P02|B1AXS9	Zmym3	Zinc finger MYM-type protein 3	MOUSE	35	31.7	492.88	0.015	0.01	-0.021	-0.076	-0.034	0.02	-0.057	-0.06	0.618566	0.999706
Q9JLI8	Q9JLI8	Sart3	Squamous cell carcinoma antigen recognized by T-cells 3	MOUSE	38	47.2	492.83	-0.081	0.181	-0.129	0.025	-0.116	-0.056	-0.061	-0.044	0.345971	0.999706
Q8C079	Q8C079	Strip1	Striatin-interacting protein 1	MOUSE	30	51.7	492.83	-0.082	-0.055	-0.103	-0.096	0.015	-0.016	-0.076	-0.04	0.551101	0.999706
Q8C9H6	Q8C9H6|E9QN41	Strip2	Striatin-interacting proteins 2	MOUSE	15	17.5	182.04	0.011	0.015	0.009	-0.08	0.044	0.077	0.028	0.187	0.949195	0.999706
Q3B7Z2	Q3B7Z2	Osbp	Oxysterol-binding protein 1	MOUSE	34	47.7	492.45	0.076	-0.094	0.084	0.084	-0.047	-0.037	-0.008	0.014	0.53634	0.999706
Q5QNQ6	Q5QNQ6|Q5QNQ4|Q8K0C7|Q5F209|Q5F210	Osbp2	Oxysterol-binding protein 2	MOUSE	17	18.5	187.22	0.018	-0.18	-0.071	-0.039	0.131	0.124	0.115	0.123	0.792232	0.999706
Q9CZ44	Q9CZ44|A2AT02	Nsfl1c	NSFL1 cofactor p47	MOUSE	35	80.8	491.8	-0.006	-0.191	-0.117	-0.107	0.021	0.024	0.056	0.083	0.789508	0.999706
Q925I8	Q925I8|E9PXQ7|E9PX28|Q6P0A6	Pcdh10	OL-protocadherin isoform	MOUSE	36	39.8	491.63	-0.001	-0.035	-0.043	-0.218	0.033	0.016	0.035	-0.09	0.1359	0.999706
E9PUU4	E9PUU4|Q8BX17|A2AFQ9|F7CKD6	Gemin5	Gem-associated protein 5	MOUSE	45	30.4	491.59	0.035	-0.027	-0.163	-0.125	0.025	0.094	0.108	-0.018	0.724313	0.999706
Q8QZT1	Q8QZT1	Acat1	Acetyl-CoA acetyltransferase, mitochondrial	MOUSE	28	83	491.54	-0.164	0.179	0.05	0.148	-0.065	-0.176	-0.313	-0.072	0.621538	0.999706
Q68FE6	Q68FE6	Ripor1	Rho family-interacting cell polarization regulator 1	MOUSE	35	34.9	491.2	-0.092	-0.076	-0.015	0.062	0.054	-0.02	-0.031	0.042	0.665786	0.999706
F7AA26	F7AA26|A2API8|O54931|G3X9P1|A0A5F8MPZ6|A2API9|A2APJ1	Pakap	Paralemmin A kinase anchor protein (Fragment)	MOUSE	36	34.9	490.88	0.078	-0.129	-0.074	-0.275	0.039	0.049	0.035	-0.117	0.102085	0.999706
Q8BR92	Q8BR92	Palm2	Paralemmin-2	MOUSE	23	77.3	346.94	0.078	-0.109	-0.059	-0.182	0.05	0.074	0.165	-0.039	0.351964	0.999706
A0A0G2JEG8	A0A0G2JEG8|Q7TQF7|A0A668KM31	Amph	Amphiphysin	MOUSE	29	55	490.69	-0.036	-0.235	-0.113	-0.109	0.041	0.058	0.034	0.07	0.802442	0.999706
Q8K2Q9	Q8K2Q9	Shtn1	Shootin-1	MOUSE	36	47	490.41	0.083	-0.186	0.032	-0.062	-0.006	0.071	0.045	-0.035	0.725174	0.999706
O08848	O08848	RO60	60 kDa SS-A/Ro ribonucleoprotein	MOUSE	34	71.7	490.17	0.012	0.163	0.098	0.169	-0.048	-0.142	-0.102	0.012	0.76682	0.999706
P58404	P58404|V9GXI9|V9GXT1|V9GXE7	Strn4	Striatin-4	MOUSE	30	56.3	490	-0.008	-0.128	-0.1	-0.114	0.029	0.046	-0.049	-0.017	0.619474	0.999706
Q9ERG2	Q9ERG2	Strn3	Striatin-3	MOUSE	28	43.2	420.95	-0.077	-0.141	-0.216	-0.513	-0.064	-0.009	-0.049	-0.253	0.0173795	0.999706
B2RQS1	B2RQS1	Strn3	Striatin-3	MOUSE	25	42.6	374.95	-0.127	-0.182	-0.115	-0.302	0.073	0.003	-0.012	-0.068	0.245915	0.999706
Q68FD9	Q68FD9|D3YTS3	Kiaa1549	UPF0606 protein KIAA1549	MOUSE	36	19.5	489.94	0.032	0.009	-0.012	-0.082	-0.054	0.006	-0.039	0.067	0.99162	0.999706
P56695	P56695|Q3UN10	Wfs1	Wolframin	MOUSE	35	42.8	489.93	-0.024	0.051	-0.072	0.028	0.06	0.084	0.015	0.046	0.58309	0.999706
F7D926	F7D926	Wfs1	Wolframin (Fragment)	MOUSE	8	67.5	107.73	-0.4	0.002	-0.454	-0.292	-0.304	0.028	-0.035	-0.213	0.0359874	0.999706
Q8BH66	Q8BH66|A0A1Y7VLD6	Atl1	Atlastin-1	MOUSE	33	57.5	489.83	0.025	-0.067	-0.038	-0.085	0.005	0.026	0.034	0.011	0.926512	0.999706
Q6PA06	Q6PA06|E9QND8|A0A1Y7VJ85	Atl2	Atlastin-2	MOUSE	30	51.2	427.64	0.023	-0.056	-0.026	-0.055	-0.011	0.057	0.043	0.02	0.994323	0.999706
Q91YH5	Q91YH5|E9PYT3|A0A494BAX8|A0A494BAU1|A0A494BAW9|A0A494B9P1	Atl3	Atlastin-3	MOUSE	21	45.6	304.81	0.087	0.161	0.02	0.043	-0.11	-0.048	0.033	-0.021	0.921136	0.999706
Q8VI56	Q8VI56	Lrp4	Low-density lipoprotein receptor-related protein 4	MOUSE	38	24.1	489.78	-0.005	0.46	0.135	0.189	-0.06	-0.164	-0.11	-0.012	0.747691	0.999706
Q9DC53	Q9DC53|Q9CYR4|Q9DB19	Cpne8	Copine-8	MOUSE	31	59.7	489.53	-0.063	-0.295	-0.089	-0.208	0.098	0.105	0.045	0.03	0.726495	0.999706
Q0VE82	Q0VE82	Cpne7	Copine-7	MOUSE	28	61.4	405.67	-0.048	-0.194	0.003	0.037	0.019	0.064	-0.043	0.054	0.783818	0.999706
Q8JZW4	Q8JZW4	Cpne5	Copine-5	MOUSE	27	56.3	421.62	-0.181	-0.335	-0.195	-0.173	-0.02	0.036	0.099	0.075	0.613399	0.999706
P59108	P59108|A0A0R4J1D0|A0A1D5RLP0	Cpne2	Copine-2	MOUSE	27	51	377.88	-0.258	-0.223	-0.14	-0.052	0.099	-0.018	-0.104	0.023	0.585494	0.999706
Q9Z140	Q9Z140|Q3UYN2|E9QA77	Cpne6	Copine-6	MOUSE	25	56.9	378.01	-0.226	-0.26	-0.155	0.044	0.119	0.112	0.064	0.296	0.266066	0.999706
Q8BLR2	Q8BLR2|Q9D6C8|A0A1L1SSY1|Q8CEQ2|D3Z5V2|A0A1L1SU07	Cpne4	Copine-4	MOUSE	24	45.2	358.73	-0.08	-0.235	-0.109	-0.096	0.136	0.052	0.062	0.102	0.705497	0.999706
E9Q1V2	E9Q1V2	Cpne5	Copine-5 (Fragment)	MOUSE	19	75.2	313.38	-0.073	-0.334	-0.308	-0.314	-0.166	0.136	0.187	-0.049	0.789573	0.999706
Q8BT60	Q8BT60	Cpne3	Copine-3	MOUSE	14	34.3	223.42	0.132	0.223	0.225	0.216	-0.111	-0.068	-0.087	0.058	0.593826	0.999706
Q1RLL3	Q1RLL3|A0A0R4J0J1	Cpne9	Copine-9	MOUSE	8	13.5	110.26	0.051	-0.017	0.197	0.102	-0.356	-0.073	-0.01	0.03	0.283549	0.999706
Q8VD65	Q8VD65|A0A0R4J2C7|A0A087WQR4|A0A087WP62	Pik3r4	Phosphoinositide 3-kinase regulatory subunit 4	MOUSE	39	35.7	489.42	-0.008	-0.014	-0.018	-0.005	-0.051	0.009	0.005	-0.001	0.980764	0.999706
E9QM38	E9QM38|P55012	Slc12a2	Solute carrier family 12 member 2	MOUSE	35	31.5	488.71	0.012	0.044	-0.035	-0.064	-0.041	-0.033	-0.078	-0.125	0.412317	0.999706
A0A1D5RL96	A0A1D5RL96|Q80TK0|F7CG54|D3YUW2	Btbd8	BTB/POZ domain-containing protein 8	MOUSE	36	23.3	487.76	-0.066	-0.311	-0.14	-0.406	0.087	0.197	0.147	-0.042	0.400828	0.999706
Q3TEG0	Q3TEG0	Btbd8	BTB/POZ domain-containing protein 8	MOUSE	16	40.4	218	-0.143	-0.338	-0.315	-0.472	0.067	0.24	0.25	0.037	0.700168	0.999706
E9Q2S0	E9Q2S0|A0A0A6YY83|A2RS43|A0A0A6YY48|A0A0A6YW34|A0A0G2JG16|A0A0A6YWD5	Pcdh7	Protocadherin 7	MOUSE	37	35.3	487.39	0.132	0.135	0.124	-0.069	-0.104	-0.073	-0.109	-0.16	0.497152	0.999706
F7BE84	F7BE84|A6H6J9	Ankrd50	Ankyrin repeat domain 50 (Fragment)	MOUSE	40	34	486.73	0.004	-0.11	-0.037	-0.087	0.066	0.148	0.12	0.042	0.91895	0.999706
D3Z643	D3Z643	Ankrd50	Ankyrin repeat domain 50	MOUSE	10	44.5	126.06	-0.028	0.191	0.221	-0.003	0.157	0.153	-0.016	-0.022	0.368865	0.999706
Q8K1N1	Q8K1N1|E9PXB0|E9QAC9|F7B2N8|A0A1W2P6P7|A0A1W2P7I1	Pnpla8	Calcium-independent phospholipase A2-gamma	MOUSE	38	50.7	486.64	-0.09	0.184	-0.017	0.041	0.007	-0.043	-0.129	-0.069	0.59598	0.999706
Q9D0K2	Q9D0K2|Q3UJQ9	Oxct1	Succinyl-CoA:3-ketoacid coenzyme A transferase 1, mitochondrial	MOUSE	27	66.3	486.52	-0.068	0.194	0.09	0.17	0.001	-0.091	-0.197	0.01	0.674072	0.999706
O35375	O35375	Nrp2	Neuropilin-2	MOUSE	35	46.1	486.2	0.06	0	0.022	-0.077	-0.042	0.001	-0.09	-0.192	0.256668	0.999706
Q9JIG7	Q9JIG7	Ccdc22	Coiled-coil domain-containing protein 22	MOUSE	38	67.9	486.1	-0.014	-0.028	-0.01	0.036	0.064	0.099	0.045	0.147	0.633153	0.999706
Q6PAV2	Q6PAV2|A0A1W2P735	Herc4	Probable E3 ubiquitin-protein ligase HERC4	MOUSE	33	44.2	485.79	-0.027	-0.023	-0.01	0.039	-0.039	-0.002	-0.071	0.067	0.561761	0.999706
Q99MR8	Q99MR8|A0A0G2JFQ5	Mccc1	Methylcrotonoyl-CoA carboxylase subunit alpha, mitochondrial	MOUSE	36	57.1	485.67	-0.024	0.324	0.021	0.185	-0.073	-0.111	-0.167	-0.054	0.53436	0.999706
A0A0G2JF64	A0A0G2JF64	Mccc1	Methylcrotonoyl-CoA carboxylase subunit alpha, mitochondrial (Fragment)	MOUSE	12	73.6	163.53	-0.152	0.027	-0.528	-0.27	-0.417	-0.092	-0.333	-0.602	0.0226051	0.999706
A2AWT5	A2AWT5|A2AWT7|P25976|A2AWT6|E9Q4A8|G3UZW9	Ubtf	Nucleolar transcription factor 1	MOUSE	41	48.1	485.45	-0.095	0.09	-0.105	-0.114	-0.019	-0.001	-0.004	-0.026	0.48738	0.999706
Q80U63	Q80U63|A8Y5E5|A2A7Y8	Mfn2	Mitofusin-2	MOUSE	33	49.6	485.45	-0.034	0.059	0.073	0.013	-0.051	-0.031	-0.087	-0.049	0.924558	0.999706
Q91YT0	Q91YT0|D3YUM1|D3Z1U9|D3Z0K1|D3YXX5|A0A494BAS8|D6RG60|A0A494BA02	Ndufv1	NADH dehydrogenase [ubiquinone] flavoprotein 1, mitochondrial	MOUSE	33	78.4	485.15	-0.168	0.184	0.088	0.19	-0.027	-0.209	-0.344	-0.055	0.709249	0.999706
Z4YJJ5	Z4YJJ5|Q80TQ2|A0A1B0GSE5	Cyld	Deubiquitinating enzyme CYLD	MOUSE	32	39.6	485.12	-0.09	-0.169	0.026	-0.107	0.126	0.108	0.131	0.144	0.806541	0.999706
Q6NS46	Q6NS46	Pdcd11	Protein RRP5 homolog	MOUSE	44	25	484.51	-0.012	0.26	-0.034	-0.096	-0.01	0.035	0.026	-0.117	0.147095	0.999706
D3Z0M9	D3Z0M9	Ddx23	RNA helicase	MOUSE	38	46.7	483.86	-0.041	0.031	0.016	-0.038	-0.043	-0.016	-0.039	-0.083	0.710564	0.999706
P97467	P97467|F8VQA4|E9Q704|F6TGI4|F7D4K4|F6T0D3	Pam	Peptidyl-glycine alpha-amidating monooxygenase	MOUSE	37	45.1	483.7	-0.125	-0.105	0.003	-0.145	0.146	0.128	0.06	0.059	0.937034	0.999706
Q9DBG7	Q9DBG7|F6VF36|A0A1L1SSI7	Srpra	Signal recognition particle receptor subunit alpha	MOUSE	39	66.1	483.58	0.016	0.102	-0.032	-0.098	0.092	0.036	-0.029	-0.131	0.11835	0.999706
Q921C5	Q921C5|D3Z390|A0A1Y7VIQ5	Bicd2	Protein bicaudal D homolog 2	MOUSE	39	47.1	483.48	0.086	-0.134	-0.009	-0.103	-0.041	0.002	0.047	-0.047	0.583762	0.999706
B2KG46	B2KG46|Q8BR07|G3UXK5|G3UY88	Bicd1	Protein bicaudal D homolog 1	MOUSE	38	35.5	466.35	0.072	-0.208	0.006	-0.103	-0.038	0.045	0.153	0.083	0.636268	0.999706
Q91WD5	Q91WD5|D3YXT0|A0A0A6YW30	Ndufs2	NADH dehydrogenase [ubiquinone] iron-sulfur protein 2, mitochondrial	MOUSE	30	71.7	483.21	-0.063	0.152	0.022	0.11	0.044	-0.032	-0.128	0.024	0.623139	0.999706
A0A0A6YXD3	A0A0A6YXD3	Ndufs2	Complex I-49kD (Fragment)	MOUSE	9	56.5	133.09	1.685	-0.142	0.272	0.041	-0.032	0.58	1.391	0.333	0.495111	0.999706
A0A0R4J049	A0A0R4J049|Q8CIG8|F6QQQ6|S4R295|A0A2I3BRG2	Prmt5	Protein arginine N-methyltransferase 5	MOUSE	34	67.3	482.97	-0.047	-0.091	0.015	0.011	0.003	-0.026	-0.072	0.058	0.686574	0.999706
Q3USJ8	Q3USJ8|A0A140LIU6	Fchsd2	F-BAR and double SH3 domains protein 2	MOUSE	36	50.6	482.88	0.049	0.09	-0.011	0.033	-0.067	-0.025	0.011	-0.068	0.953116	0.999706
P97333	P97333	Nrp1	Neuropilin-1	MOUSE	31	43.3	482.44	0.068	0.06	0.121	-0.051	-0.012	-0.104	-0.083	-0.132	0.538416	0.999706
Q9CPY7	Q9CPY7|A0A0G2JEM7	Lap3	Cytosol aminopeptidase	MOUSE	31	74.5	482.14	-0.099	0.245	0.163	0.267	-0.037	-0.182	-0.218	-0.048	0.776228	0.999706
Q8BWG8	Q8BWG8|J3QNU6|E0CY53|E0CYB1|F7DF62|Q9EQP6|P20443|J3QNF6	Arrb1	Beta-arrestin-1	MOUSE	30	80.1	482.03	-0.01	-0.155	0.012	0.053	0.05	-0.016	-0.016	0.112	0.269251	0.999706
P68500	P68500|E9PYK7	Cntn5	Contactin-5	MOUSE	36	41.3	481.69	0.114	0.004	0.096	-0.01	-0.058	-0.094	-0.145	-0.101	0.808149	0.999706
Q69Z26	Q69Z26|F8WH58	Cntn4	Contactin-4	MOUSE	6	7.6	90.65	0.014	0.03	-0.036	-0.236	0.051	0.012	-0.046	-0.02	0.325365	0.999706
Q8BHL5	Q8BHL5|F6YXR3|Q5GMG0|D6RHT3|A2A5A7	Elmo2	Engulfment and cell motility protein 2	MOUSE	35	54.9	480.89	0.085	-0.04	0.022	0.079	-0.003	-0.013	-0.001	0.079	0.498562	0.999706
Q8BPU7	Q8BPU7|A0A1Y7VIX9	Elmo1	Engulfment and cell motility protein 1	MOUSE	18	25.7	218.25	-0.188	-0.147	-0.18	-0.259	0.107	0.152	0.033	0.006	0.631845	0.999706
F6XD63	F6XD63	Elmo2	Engulfment and cell motility protein 2 (Fragment)	MOUSE	4	23.1	50.9	-0.071	-0.309	-0.431	-0.081	0.027	-0.114	0.114	0.182	0.318719	0.999706
F8VPP8	F8VPP8|A0A2R8VHI0	Zc3h7b	Zinc finger CCCH type-containing 7B	MOUSE	38	44.7	480.67	-0.041	-0.079	-0.093	-0.139	0.023	0.022	0.018	-0.107	0.346086	0.999706
Q6PCN3	Q6PCN3	Ttbk1	Tau-tubulin kinase 1	MOUSE	38	33.1	480.64	0.131	-0.005	0.032	-0.03	-0.072	-0.011	0.006	-0.083	0.791078	0.999706
A0A286YDE4	A0A286YDE4	Ttbk1	Tau-tubulin kinase 1	MOUSE	25	37.3	305.36	-0.031	-0.222	-0.341	-0.202	-0.046	-0.02	-0.123	-0.255	0.0911529	0.999706
A2AW15	A2AW15|Q3UVR3|A2AW13|A2AW14	Ttbk2	Tau-tubulin kinase 2	MOUSE	13	9.5	138.1	-0.054	-0.098	-0.053	-0.148	0.058	0.139	0.156	0.046	0.792965	0.999706
P97310	P97310|A0A0N4SVY2	Mcm2	DNA replication licensing factor MCM2	MOUSE	39	51.3	480.17	0.087	0.731	0.238	0.263	-0.194	-0.207	-0.153	-0.066	0.624699	0.999706
Q9R111	Q9R111|A0A494B982|D3YU09	Gda	Guanine deaminase	MOUSE	29	83	480.08	-0.224	-0.049	0.182	0.178	0.104	-0.225	-0.427	0.058	0.691678	0.999706
A2ALS5	A2ALS5|A2ALS4|A2ALS3|A2ALS2	Rap1gap	Rap1 GTPase-activating protein 1	MOUSE	32	52.3	479.99	0.003	-0.031	-0.028	-0.018	0.077	0.011	-0.017	0.025	0.850331	0.999706
Q5SVL6	Q5SVL6|A0A571BED8|A0A171EBK8|Q5SUE5	Rap1gap2	Rap1 GTPase-activating protein 2	MOUSE	30	48.1	415.79	0	-0.168	-0.038	-0.008	0.045	-0.021	0.018	0.092	0.355863	0.999706
A2ALS7	A2ALS7	Rap1gap	Rap1 GTPase-activating protein 1 (Fragment)	MOUSE	19	46.1	290.01	-0.011	-0.151	-0.1	-0.292	0.15	0.069	0.072	0.099	0.610227	0.999706
A0A140LI95	A0A140LI95	Rap1gap2	Rap1 GTPase-activating protein 2 (Fragment)	MOUSE	5	27.7	66.75	0.489	0.345	0.429	0.6	-0.096	-0.105	-0.485	-0.168	0.721093	0.999706
Q9DC50	Q9DC50	Crot	Peroxisomal carnitine O-octanoyltransferase	MOUSE	32	53.5	479.83	-0.071	-0.277	-0.089	-0.14	0.123	0.098	0.113	0.186	0.798809	0.999706
Q8K284	Q8K284|A0A0U1RPD8|A0A0U1RP70|A0A0U1RNK8|A0A0U1RNV0	Gtf3c1	General transcription factor 3C polypeptide 1	MOUSE	41	24.1	479.75	0.042	0.413	0.054	0.119	-0.055	-0.03	-0.085	-0.083	0.385692	0.999706
A0A0J9YUR2	A0A0J9YUR2|Q5SXY1|A0A0J9YTU3|A0A0J9YV86|A0A0J9YUF8|A0A0J9YUG8|A0A0J9YV47	Specc1	Cytospin-B	MOUSE	39	42.6	479.69	0.157	0.002	0.011	0.073	-0.031	-0.008	0.073	0.052	0.79155	0.999706
Q60625	Q60625	Icam5	Intercellular adhesion molecule 5	MOUSE	35	41.3	479.53	0.114	-0.078	0.064	-0.034	0.041	0	0.063	0.077	0.47278	0.999706
O89053	O89053|G3UYK8|A0A0U1RPY8|D3YW57|D3YXM2|G3UX53	Coro1a	Coronin-1A	MOUSE	33	62.2	478.79	-0.111	-0.267	-0.075	-0.136	0.194	0.028	0.031	0.017	0.547425	0.999706
Q3TZZ7	Q3TZZ7|A0A1Y7VM39|A0A1Y7VNA1	Esyt2	Extended synaptotagmin-2	MOUSE	34	45.4	478.48	0.092	-0.007	0.047	0.009	-0.026	0.01	0.013	0.045	0.958946	0.999706
Q8C167	Q8C167|A0A3Q4L354|A0A3Q4EGY4	Prepl	Prolyl endopeptidase-like	MOUSE	32	48.6	478.36	-0.082	-0.311	-0.197	-0.242	0.187	0.15	0.127	0.018	0.666589	0.999706
F7C3A0	F7C3A0|H3BIW6|A2AP18|H3BK11|A0A087WSR3|F7C512|F6UKG4|Q4KWH5|I1E4X6|H3BKK4|I1E4X4|A0A0A0MQM2|H3BKE1|A6PWW4	Plch2	Phosphoinositide phospholipase C	MOUSE	37	35.4	477.78	0.001	-0.141	-0.064	-0.06	0.034	-0.038	0.003	0.113	0.485318	0.999706
E9QAT4	E9QAT4|F7BPW6|F6T8X6	Sec16a	Protein transport protein Sec16A	MOUSE	35	21.5	477.77	-0.039	-0.18	-0.186	-0.076	0.092	0.121	0.057	-0.012	0.857792	0.999706
Q8K1A6	Q8K1A6	Cc2d1a	Coiled-coil and C2 domain-containing protein 1A	MOUSE	38	45.8	477.19	-0.02	-0.143	-0.053	-0.056	0.065	0.068	0.026	0.107	0.901109	0.999706
E9PX94	E9PX94	Cc2d1a	Coiled-coil and C2 domain-containing protein 1A	MOUSE	36	45	442.7	-0.137	-0.133	-0.232	-0.226	0.056	0.075	-0.013	0.039	0.575526	0.999706
P51655	P51655	Gpc4	Glypican-4	MOUSE	34	57.9	476.99	0.054	0.049	-0.064	-0.159	-0.048	0.014	-0.006	-0.167	0.106964	0.999706
Q8R3X6	Q8R3X6|Q9R087	Gpc6	Glypican-6	MOUSE	16	38.4	249.55	0.04	0.01	-0.065	-0.099	-0.06	0.03	0.097	0.041	0.970639	0.999706
Q9D1A2	Q9D1A2|A0A494B9S3|A0A494B9U6	Cndp2	Cytosolic non-specific dipeptidase	MOUSE	29	77.4	476.63	-0.045	-0.132	0.012	0.026	0.016	-0.025	-0.06	0.076	0.480392	0.999706
Q8CIB5	Q8CIB5|A6X941	Fermt2	Fermitin family homolog 2	MOUSE	32	60.7	476.29	0.175	-0.003	0.061	0.08	-0.038	0.03	0.111	0.097	0.660411	0.999706
A6X940	A6X940	Fermt2	Fermitin family homolog 2 (Fragment)	MOUSE	12	49.6	144.14	0.125	-0.164	-0.071	0.084	0.036	-0.065	-0.016	-0.092	0.307027	0.999706
P70698	P70698	Ctps1	CTP synthase 1	MOUSE	33	69	476.09	-0.081	0.083	0.029	0.03	-0.002	-0.109	-0.194	-0.121	0.882811	0.999706
P70303	P70303|A2AEQ5	Ctps2	CTP synthase 2	MOUSE	25	46.5	318.47	-0.119	0.102	0.102	0.092	0.021	-0.133	-0.078	0.013	0.882696	0.999706
Q3UMA3	Q3UMA3|Q99LI8|B1ATY9|F6VV02	Hgs	Hepatocyte growth factor-regulated tyrosine kinase substrate	MOUSE	34	43.9	475.93	-0.031	-0.228	-0.066	-0.119	0.055	0.072	0.026	0.051	0.840022	0.999706
A0A5F8MPP7	A0A5F8MPP7|A2AAY5	Sh3pxd2b	SH3 and PX domain-containing protein 2B	MOUSE	41	44.5	475.69	0.052	-0.151	-0.065	-0.071	0.071	0.081	0.089	0.069	0.814321	0.999706
O89032	O89032|A0A494BBI9	Sh3pxd2a	SH3 and PX domain-containing protein 2A	MOUSE	15	15.8	187.39	0.035	-0.029	0.027	-0.087	-0.088	-0.032	-0.017	-0.015	0.897019	0.999706
Q8BNU0	Q8BNU0|D3Z3J0	Armc6	Armadillo repeat-containing protein 6	MOUSE	31	72.2	475.17	0.027	-0.036	0.03	0.015	-0.018	-0.043	-0.028	0.068	0.767339	0.999706
A0A494BB75	A0A494BB75|Q8C6G8|E0CYH4|F7DFQ2|F6UT94|F8WH48	Wdr26	WD repeat-containing protein 26	MOUSE	33	57	474.93	-0.038	-0.051	-0.004	0.014	-0.025	-0.054	-0.156	0.017	0.613992	0.999706
Q9D2N9	Q9D2N9|A0A0G2JEL2	Vps33a	Vacuolar protein sorting-associated protein 33A	MOUSE	34	68.2	474.77	-0.02	-0.036	0.131	0.08	0.05	0.008	-0.035	0.059	0.771802	0.999706
A2A5Y6	A2A5Y6|A0A0A0MQC7|P10637|B1AQW5|B1AQW6	Mapt	Microtubule-associated protein	MOUSE	36	44.1	474.59	0.037	-0.21	-0.048	-0.072	0.042	0.079	0.15	0.079	0.743286	0.999706
B1AQW2	B1AQW2|B1AQW4	Mapt	Microtubule-associated protein	MOUSE	33	77.1	458.26	0.266	0.259	0.264	0.225	0.196	0.03	0.388	0.103	0.0500113	0.999706
Q60598	Q60598|Q921L6	Cttn	Src substrate cortactin	MOUSE	34	57.5	474.51	-0.04	-0.302	-0.219	-0.423	0.107	0.108	0.149	-0.098	0.21211	0.999706
P62141	P62141|A0A0J9YUU8|A0A0J9YUG2	Ppp1cb	Serine/threonine-protein phosphatase PP1-beta catalytic subunit	MOUSE	28	91.7	474.28	-0.203	0.102	0.181	0.174	0.088	-0.092	-0.227	-0.06	0.961451	0.999706
P62137	P62137	Ppp1ca	Serine/threonine-protein phosphatase PP1-alpha catalytic subunit	MOUSE	25	76.6	432.22	0.032	-0.156	-0.007	-0.07	0.053	0.041	0.122	0.054	0.583789	0.999706
P63087	P63087|A0A0G2JGC1	Ppp1cc	Serine/threonine-protein phosphatase PP1-gamma catalytic subunit	MOUSE	23	73.3	384.69	0.078	0.072	0.188	-0.082	0.054	0.076	0.2	0.031	0.0590881	0.999706
A0A0G2JFF1	A0A0G2JFF1	Ppp1cc	Serine/threonine-protein phosphatase (Fragment)	MOUSE	18	65.7	293.66	0.13	-0.001	0.042	-0.048	-0.207	0.223	0.169	-0.088	0.557225	0.999706
Q8R307	Q8R307	Vps18	Vacuolar protein sorting-associated protein 18 homolog	MOUSE	36	43.3	474.07	0.059	-0.084	-0.081	-0.016	-0.037	0.077	-0.079	0.009	0.745852	0.999706
A0A087WQS2	A0A087WQS2|Q9CQC6|A0A087WPF9|A0A087WS48	Bzw1	Basic leucine zipper and W2 domain-containing protein 1	MOUSE	32	72.9	473.96	-0.021	-0.003	-0.157	-0.077	0.154	0.077	0.051	0.006	0.525436	0.999706
Q91VK1	Q91VK1|A0A1Y7VKZ4|A0A1Y7VJ43|A0A1Y7VIU9|A0A1Y7VM47|A0A1Y7VM24	Bzw2	Basic leucine zipper and W2 domain-containing protein 2	MOUSE	30	62.2	388.64	0.02	-0.016	-0.144	0.001	0.03	0.092	0.041	0.062	0.714433	0.999706
Q99MN9	Q99MN9|E9Q1J7|D3YZC1|A0A087WQV1	Pccb	Propionyl-CoA carboxylase beta chain, mitochondrial	MOUSE	31	70.9	473.78	-0.222	0.182	0.032	0.22	-0.03	-0.237	-0.408	-0.084	0.580139	0.999706
Q9QY81	Q9QY81|A0A0R4J1I6|F6XGN0	Nup210	Nuclear pore membrane glycoprotein 210	MOUSE	35	23.2	473.66	-0.003	0.776	0.048	0.089	-0.15	-0.181	-0.287	-0.363	0.366216	0.999706
Q91Y09	Q91Y09|Q91Y10|A0A0A6YX38	Pcdhac2	Protocadherin alpha C2	MOUSE	33	45.4	472.21	-0.023	-0.071	-0.066	-0.181	0.014	-0.006	-0.045	-0.14	0.116544	0.999706
O88689	O88689|Q91Y20|A0A0A6YY55	Pcdha4	Protocadherin alpha-4	MOUSE	22	29.5	264.54	0.009	0.057	0.061	-0.025	0.052	0.058	0.085	0.081	0.715362	0.999706
Q91Y18	Q91Y18|Q91Y13|Q91Y21|Q91Y14|Q91Y12	Pcdha12	Protocadherin alpha 12	MOUSE	20	28.4	264.86	0.057	0.054	0.033	-0.203	-0.049	-0.027	0.106	-0.06	0.252518	0.999706
Q91Y15	Q91Y15	Pcdha5	Protocadherin alpha 5	MOUSE	19	26.9	242.5	0.067	0.078	0.074	-0.159	0.013	0.107	0.095	0.155	0.756818	0.999706
Q91Y11	Q91Y11	Pcdha9	Protocadherin alpha-9	MOUSE	16	20.8	192.39	0.26	-0.102	-0.039	-0.012	0.016	0.166	0.275	0.531	0.599262	0.999706
A0A0A6YY44	A0A0A6YY44|Q641K6|B9EKB6	Pcdha11	Protocadherin alpha 11	MOUSE	15	21.7	185.34	0.06	-0.099	0.135	-0.121	0.055	0.026	0.089	-0.008	0.190373	0.999706
Q91Y16	Q91Y16	Pcdha3	Protocadherin alpha 3	MOUSE	14	20.1	194.79	0.301	0.194	0.26	0.07	-0.212	-0.302	-0.124	-0.153	0.890581	0.999706
Q91Y17	Q91Y17	Pcdha2	Protocadherin alpha 2	MOUSE	14	19.6	182.2	0.078	0.312	0.469	0.258	0.148	0.013	-0.162	-0.283	0.776091	0.999706
Q3U9D6	Q3U9D6|A0A5F8MPW8|Q8R313|A0A5F8MP92	Exoc6	Exocyst complex component	MOUSE	35	45.6	472.05	-0.064	-0.088	-0.121	-0.092	0.047	0.055	0.058	0.037	0.984608	0.999706
Q8C419	Q8C419	Gpr158	Probable G-protein coupled receptor 158	MOUSE	34	33.5	471.95	-0.045	-0.095	-0.042	-0.132	0.082	0.092	0.146	0.086	0.893956	0.999706
O08749	O08749	Dld	Dihydrolipoyl dehydrogenase, mitochondrial	MOUSE	28	73.8	471.77	-0.13	0.154	0.071	0.164	0.03	-0.076	-0.232	0.1	0.466873	0.999706
Q8BH57	Q8BH57|A0A1L1SS76	Wdr48	WD repeat-containing protein 48	MOUSE	33	63.4	471.72	-0.036	-0.085	0.054	0.035	0.02	-0.053	-0.09	0.043	0.66241	0.999706
Q80WJ7	Q80WJ7|F6QHD1|F6QFT1|E9PUX0|F6ZQL0|A0A2I3BRF4	Mtdh	Protein LYRIC	MOUSE	30	56.4	470.43	0.062	0.15	-0.11	-0.107	-0.021	0.034	-0.013	-0.153	0.12051	0.999706
F6ZSG0	F6ZSG0	Mtdh	Protein LYRIC (Fragment)	MOUSE	16	48	251.94	0.058	0.07	-0.06	-0.171	-0.158	-0.178	-0.092	-0.303	0.144878	0.999706
A0A286YD35	A0A286YD35|Q08460|E3VRY9|J3QMT8|J3QN27|A0A286YDM6|A0A087WQN5|A0A087WRS4|A0A286YCP1|A0A286YCZ9|A0A286YDC1|A0A286YD59|A0A286YE30|A0A087WQ41|A0A286YDR7|A0A286YDU9|A0A286YCQ2|F6WSZ3|E3VRZ4|A0A286YCW3|F6ZSN2|F6XW53|F6V0P5|E3VRY6|E9Q9P4|A0A286YCF5|J3QP84|A0A286YCI9|F7BHL0|A0A087WQE1|A0A286YDB5|A0A1D5RMA3|A0A286YD36	Kcnma1	BK channel	MOUSE	32	34.4	470.33	0.018	-0.043	-0.041	-0.105	-0.009	0.03	0.026	-0.072	0.53565	0.999706
P09055	P09055|Q9Z0T9|B1AYG6|B1AYG7	Itgb1	Integrin beta-1	MOUSE	33	41.9	470.26	0.009	0.233	0.066	0.052	0.018	0.031	-0.081	-0.079	0.380005	0.999706
F8WIZ7	F8WIZ7	Osbpl6	Oxysterol-binding protein	MOUSE	35	38.7	469.38	0.029	-0.073	-0.006	-0.074	0.032	0.006	0.022	0.024	0.829933	0.999706
Q8BXR9	Q8BXR9|V9GXX3	Osbpl6	Oxysterol-binding protein-related protein 6	MOUSE	34	38.2	449.55	0.182	0.128	0.159	0.003	-0.076	0.045	0.317	-0.035	0.1778	0.999706
Q99ME2	Q99ME2	Wdr6	WD repeat-containing protein 6	MOUSE	34	40.5	469.29	0.025	0.015	-0.098	0.049	0.011	0.014	0.018	0.137	0.417916	0.999706
F6QB26	F6QB26|Q60780|Q3U432|A0A6I8MWW1	Gas7	Growth arrest-specific protein 7	MOUSE	34	69.3	468.51	-0.014	-0.238	-0.046	-0.207	0.172	0.115	0.092	0.053	0.546555	0.999706
Q61655	Q61655	Ddx19a	ATP-dependent RNA helicase DDX19A	MOUSE	33	75.9	468.01	-0.062	0.092	-0.003	0.107	-0.021	-0.009	-0.007	0.042	0.466655	0.999706
Q8R3C7	Q8R3C7|Q8BZY3	Ddx19b	RNA helicase	MOUSE	31	75.1	454.48	-0.028	-0.1	-0.003	0.039	0.018	0.019	-0.108	0.062	0.63149	0.999706
Q9QY15	Q9QY15	Ddx25	ATP-dependent RNA helicase DDX25	MOUSE	7	13.6	72.71	-0.097	-0.037	-0.22	-0.161	-0.033	0.258	0.08	-0.06	0.289817	0.999706
Q8VHH7	Q8VHH7|B8JK56	Adcy3	Adenylate cyclase type 3	MOUSE	36	34.8	467.93	0.098	0.111	-0.004	-0.059	-0.074	-0.015	-0.029	-0.167	0.306305	0.999706
A0A498WGM0	A0A498WGM0|A0A286YCR9|A0A494BB44|A0A494B991|A0A494B9N4|Q9R0N7|A0A494B8X6	Syt7	Synaptotagmin-7	MOUSE	33	52.8	467.6	0.035	-0.015	0.103	0.078	0.05	0.037	0.061	0.153	0.319049	0.999706
A0A2C9F2C1	A0A2C9F2C1	Syt7	Synaptotagmin-7	MOUSE	29	50.9	411.05	0.144	0.048	0.32	-0.033	-0.096	-0.106	0.03	-0.008	0.314859	0.999706
Q6P542	Q6P542	Abcf1	ATP-binding cassette sub-family F member 1	MOUSE	30	45	467.3	-0.103	0.081	-0.227	-0.064	-0.024	-0.028	-0.141	-0.233	0.134794	0.999706
G3X920	G3X920|Q9DBR3	Armc8	Armadillo repeat-containing protein 8	MOUSE	31	55.5	467.25	0.057	-0.103	-0.06	-0.033	0.009	0.075	0.041	0.019	0.966643	0.999706
P46061	P46061|A0A2R8VHK9|A0A2R8W753	Rangap1	Ran GTPase-activating protein 1	MOUSE	32	62.8	467.14	0.102	0.035	0.108	-0.081	0.011	0.015	-0.095	-0.124	0.340398	0.999706
O70194	O70194|A0A2R8VK20	Eif3d	Eukaryotic translation initiation factor 3 subunit D	MOUSE	29	67.1	466.93	-0.082	-0.088	-0.156	-0.197	0.116	0.11	0.01	-0.054	0.334956	0.999706
Q61881	Q61881|D3Z6N3	Mcm7	DNA replication licensing factor MCM7	MOUSE	35	51.7	466.84	0.058	0.909	0.204	0.349	-0.256	-0.352	-0.263	-0.147	0.704307	0.999706
Q9JL04	Q9JL04|A0A0A6YY57	Fmn2	Formin-2	MOUSE	37	28.3	466.59	-0.002	-0.164	-0.062	-0.162	0.025	0.04	0.061	0	0.650698	0.999706
Q8CHT0	Q8CHT0	Aldh4a1	Delta-1-pyrroline-5-carboxylate dehydrogenase, mitochondrial	MOUSE	34	73.3	466.48	-0.173	0.242	-0.066	0.18	0.031	-0.146	-0.277	-0.084	0.532809	0.999706
P49717	P49717|A0A2R8VHP7|A0A2R8VKJ4	Mcm4	DNA replication licensing factor MCM4	MOUSE	34	49.5	466.47	0.076	0.799	0.194	0.339	-0.221	-0.253	-0.152	-0.003	0.59803	0.999706
Q69ZS7	Q69ZS7|Q3TGM7|A0A1W2P833|L7N209|J3KMK0|A0A1W2P6V8	Hbs1l	HBS1-like protein	MOUSE	33	56.1	466.24	-0.043	0.05	0.006	0.028	-0.011	-0.029	-0.073	-0.027	0.931462	0.999706
E9QAQ5	E9QAQ5|Q9WV60	Gsk3b	Glycogen synthase kinase-3 beta	MOUSE	30	69.5	466.08	-0.004	-0.151	-0.147	-0.09	0.041	0.071	0.027	0.059	0.848422	0.999706
Q2NL51	Q2NL51|D3Z7E5	Gsk3a	Glycogen synthase kinase-3 alpha	MOUSE	29	71.2	442.69	-0.002	-0.153	-0.093	-0.029	0.047	-0.057	-0.042	0.037	0.249542	0.999706
Q9D2R0	Q9D2R0	Aacs	Acetoacetyl-CoA synthetase	MOUSE	35	54.6	465.94	0.126	0.228	0.019	0.153	-0.12	0.02	0.004	-0.028	0.567427	0.999706
Q9QYI3	Q9QYI3|A0A6I8MWX8|A0A6I8MX00|A2A5E1|A0A6I8MWZ1|A0A6I8MWY7|F7BTP8|A0A6I8MWZ9|A0A6I8MX31|A0A6I8MWW2|A0A6I8MWZ5|A0A6I8MWW0	Dnajc7	DnaJ homolog subfamily C member 7	MOUSE	32	65.1	465.78	-0.072	0.096	-0.132	-0.03	0.023	0.039	-0.029	-0.007	0.366911	0.999706
P15105	P15105|D3YVK1	Glul	Glutamine synthetase	MOUSE	31	74.7	465.62	0.178	0.146	0.277	0.331	-0.05	-0.171	-0.16	0.072	0.4054	0.999706
P12023	P12023|A0A2I3BQZ9|Q3TWF3|A0A2I3BPT1|A0A2I3BR03	App	Amyloid-beta A4 protein	MOUSE	31	53.1	465.37	-0.002	-0.05	0.154	-0.215	0.015	0.094	0.176	-0.121	0.0188726	0.999706
Q6Y7W8	Q6Y7W8|G3UYG6|G3UWR2|G3UYR9|G3UZX7|E9Q2M5|G3UZW5|G3UZS9|G3UXF2	Gigyf2	GRB10-interacting GYF protein 2	MOUSE	39	35	465.16	-0.03	-0.173	-0.067	-0.177	0.12	0.083	0.063	-0.147	0.221643	0.999706
Q8K1R3	Q8K1R3	Pnpt1	Polyribonucleotide nucleotidyltransferase 1, mitochondrial	MOUSE	35	49.5	464.59	-0.063	0.272	0.051	0.153	-0.112	-0.16	-0.205	-0.024	0.580355	0.999706
Q9CZ30	Q9CZ30|B1AYJ9	Ola1	Obg-like ATPase 1	MOUSE	31	76.7	463.94	-0.06	0.007	0.046	0.133	-0.016	-0.096	-0.203	0.092	0.299608	0.999706
Q99K73	Q99K73|Q3UXF4|E9Q7X0|Q9WU00|D3Z3B4|G3XA39|D3YV66	Nrf1	Nrf1 protein	MOUSE	5	7.6	48.97	-0.033	0.12	0.063	0.084	-0.084	-0.148	-0.019	-0.114	0.90409	0.999706
Q8R570	Q8R570|B2FDF6|I7HFU4|I7HPB1|J3JS29|I7HIK2|B2FDF7	Snap47	Synaptosomal-associated protein 47	MOUSE	29	80.8	463.92	0.053	-0.17	-0.035	0.064	0.045	0.041	-0.017	0.085	0.427742	0.999706
Q60865	Q60865|F6YLI0|F6YP03	Caprin1	Caprin-1	MOUSE	31	59.9	463.67	-0.03	-0.427	-0.326	-0.508	0.119	0.131	0.026	-0.188	0.13256	0.999706
Q8C9B9	Q8C9B9|A0A0R4J0L7	Dido1	Death-inducer obliterator 1	MOUSE	38	20.8	463.06	0.158	0.004	0.137	0.029	-0.2	-0.065	0.042	-0.117	0.673018	0.999706
Q6KCD5	Q6KCD5	Nipbl	Nipped-B-like protein	MOUSE	43	15.6	462.75	0.095	0.128	0.026	-0.027	-0.094	-0.012	0.075	-0.052	0.717524	0.999706
Q5DU14	Q5DU14|F8WGF8|A0A140LJ46|A0A1L1SRA7	Myo16	Unconventional myosin-XVI	MOUSE	38	23.3	462.5	0.081	-0.068	-0.126	-0.34	0.072	0.067	0.094	-0.268	0.0147114	0.999706
E9PUI5	E9PUI5|Q8K012|A0A5F8MPQ8|E9PUK3|A0A0G2JFM9	Fnbp1l	Formin-binding protein 1-like	MOUSE	36	59.9	462.12	-0.029	-0.21	-0.057	-0.145	0.038	0.04	0.015	0.046	0.770209	0.999706
P05532	P05532|P09581	Kit	Mast/stem cell growth factor receptor Kit	MOUSE	32	36	462.05	0.162	0.058	0.096	0.005	-0.081	-0.066	-0.076	-0.109	0.826485	0.999706
Q91W39	Q91W39|B7ZC23|A2A5L3	Ncoa5	Nuclear receptor coactivator 5	MOUSE	38	61.1	461.92	0.064	-0.117	0.024	-0.147	0.017	0.033	0.1	-0.038	0.299108	0.999706
B7ZC24	B7ZC24	Ncoa5	Nuclear receptor coactivator 5	MOUSE	33	63.7	375.96	-0.082	0.005	0.064	0.14	-0.153	-0.118	-0.206	0.11	0.137146	0.999706
Q5SXA9	Q5SXA9	Wwc1	Protein KIBRA	MOUSE	39	39.3	461.67	0.026	-0.124	-0.035	-0.184	0.036	0.071	0.116	0.068	0.773292	0.999706
Q9Z0P4	Q9Z0P4|Q3UZP7|A0A1W2P831	Palm	Paralemmin-1	MOUSE	30	80.4	461	0.132	-0.05	-0.034	-0.108	0.045	-0.028	0.042	-0.025	0.2972	0.999706
A0A1W2P879	A0A1W2P879	Palm	Paralemmin-1 (Fragment)	MOUSE	9	91.3	187.45	-0.041	-0.097	0.089	-0.058	-0.07	-0.091	0.008	-0.212	0.143085	0.999706
Q91Z31	Q91Z31|A0A0G2JGW0|Q3V328|A0A0G2JE77	Ptbp2	Polypyrimidine tract-binding protein 2	MOUSE	26	80.7	460.79	-0.07	-0.201	-0.032	-0.132	0.006	-0.018	-0.112	-0.184	0.328426	0.999706
A0A0G2JFV8	A0A0G2JFV8	Ptbp2	Polypyrimidine tract-binding protein 2 (Fragment)	MOUSE	4	70.3	86.35	-0.041	0.251	0.55	0.366	-0.127	-0.204	-0.364	-0.399	0.962858	0.999706
Q9Z315	Q9Z315|A0A494B9E9	Sart1	U4/U6.U5 tri-snRNP-associated protein 1	MOUSE	34	46.5	460.74	-0.02	-0.123	-0.093	-0.214	-0.047	0.001	0.017	-0.175	0.118299	0.999706
Q8BG51	Q8BG51|A0A494BBK2	Rhot1	Mitochondrial Rho GTPase 1	MOUSE	30	59.1	460.64	-0.03	0.188	0.007	0.032	-0.059	-0.05	-0.097	-0.086	0.587736	0.999706
F7ASU3	F7ASU3	Rhot1	Mitochondrial Rho GTPase 1 (Fragment)	MOUSE	22	55	309.61	-0.012	-0.243	0.134	0.053	0.058	-0.116	-0.266	-0.205	0.613085	0.999706
Q8JZN7	Q8JZN7|H3BKJ1|H3BL14|H3BKL2	Rhot2	Mitochondrial Rho GTPase 2	MOUSE	21	44.1	305.86	0.006	0.39	-0.009	0.121	-0.191	-0.138	-0.252	-0.264	0.409317	0.999706
E0CXZ1	E0CXZ1|J3QM95|Q8BYN5|F8WGT4	Fsd1l	FSD1-like protein (Fragment)	MOUSE	33	72.2	460.59	0.015	-0.116	-0.024	0.012	0.038	-0.04	-0.004	0.054	0.399655	0.999706
Q8CG47	Q8CG47|E9Q2X6|Q3U763|A0A0A6YXY3	Smc4	Structural maintenance of chromosomes protein 4	MOUSE	39	28.3	460.47	0.107	0.666	0.098	0.256	-0.168	-0.206	-0.119	-0.022	0.647512	0.999706
E9Q3Q6	E9Q3Q6|Q61490|E9Q4G8|F6QH25|Q5MPX5	Alcam	Activated leukocyte cell adhesion molecule	MOUSE	31	51.4	460.41	-0.013	-0.03	-0.054	-0.006	0.008	-0.025	-0.101	-0.055	0.654031	0.999706
P30275	P30275|A2ARP5|B0R0E9|B0R0F0|B0R0E8|D6RG68|D6RET9	Ckmt1	Creatine kinase U-type, mitochondrial	MOUSE	31	71.7	460.33	-0.021	-0.078	0.036	-0.032	-0.02	-0.08	-0.14	0.026	0.760274	0.999706
Q6P8J7	Q6P8J7	Ckmt2	Creatine kinase S-type, mitochondrial	MOUSE	9	19.8	89.36	-0.358	-0.019	0.166	0.083	-0.572	-0.662	-0.559	-0.244	0.164725	0.999706
P08752	P08752|A0A0A6YWA9|P50149|P20612|A2AE32|A2AE31	Gnai2	Guanine nucleotide-binding protein G(i) subunit alpha-2	MOUSE	27	74.6	456.28	0.044	0.095	0.107	0.08	0.116	0.049	0.046	0.063	0.551832	0.999706
P18872	P18872|D3Z2M7|F7BLT7	Gnao1	Guanine nucleotide-binding protein G(o) subunit alpha	MOUSE	26	82.4	460.21	0.016	0.035	0.117	0.067	0.018	-0.046	-0.043	0.005	0.937236	0.999706
P63094	P63094|Z4YKV1|A2A610|A0A571BDL4	Gnas	Guanine nucleotide-binding protein G(s) subunit alpha isoforms short	MOUSE	25	66.2	394.69	-0.041	0.099	0.06	0.016	-0.001	-0.064	-0.087	0.006	0.982268	0.999706
B2RSH2	B2RSH2	Gnai1	Guanine nucleotide-binding protein G(i) subunit alpha-1	MOUSE	23	70	399.64	-0.053	0.002	0	-0.033	0.16	0.081	0.003	0.102	0.911929	0.999706
Q66L47	Q66L47|Q8BHK8|A0A494BA65	Gnal	Guanine nucleotide binding protein, alpha stimulating, olfactory type	MOUSE	22	54	328.98	-0.214	-0.159	-0.158	-0.331	0.233	0.15	0.069	-0.185	0.214935	0.999706
Q8CGK7	Q8CGK7|Q8C040	Gnal	Guanine nucleotide-binding protein G(olf) subunit alpha	MOUSE	21	60.8	328.98	0.02	0.051	0.014	-0.05	-0.049	-0.235	-0.205	-0.229	0.460684	0.999706
P27601	P27601|Q9D034	Gna13	Guanine nucleotide-binding protein subunit alpha-13	MOUSE	21	52.5	280.86	-0.039	0.006	-0.001	0.087	-0.086	-0.118	-0.205	-0.064	0.51642	0.999706
Q9DC51	Q9DC51	Gnai3	Guanine nucleotide-binding protein G(i) subunit alpha-3	MOUSE	20	67.2	353.14	0.146	0.17	0.129	0.098	0.018	-0.03	-0.084	-0.04	0.759673	0.999706
P27600	P27600|A0A0G2JG40	Gna12	Guanine nucleotide-binding protein subunit alpha-12	MOUSE	19	46.4	212.68	0.096	-0.006	-0.027	-0.057	-0.054	0.038	-0.084	-0.053	0.671347	0.999706
F6WC15	F6WC15|F6W1B2	Gnao1	Guanine nucleotide-binding protein G(o) subunit alpha (Fragment)	MOUSE	8	69.7	133.87	2.749	0.027	-0.59	-0.21	0.427	1.269	2.449	0.597	0.579551	0.999706
Q3V3I2	Q3V3I2	Gnat3	Guanine nucleotide-binding protein G(t) subunit alpha-3	MOUSE	3	7.9	35.67	0.257	-0.73	-0.898	-1.27	0.024	0.811	1.029	0.25	0.799442	0.999706
Q8BIZ1	Q8BIZ1|S4R286|K4DI73|S4R2H8|S4R2E3|A0A140T8U6|S4R1G5|S4R235|S4R1K4|S4R2J3|S4R2M2|S4R1W3	Anks1b	Ankyrin repeat and sterile alpha motif domain-containing protein 1B	MOUSE	33	29.6	459.64	0	-0.205	-0.037	-0.208	0.158	0.231	0.277	0.119	0.660109	0.999706
A0A0R4J2A6	A0A0R4J2A6|A0A0R4J2A8|S4R1H2|S4R2K2	Anks1b	Ankyrin repeat and sterile alpha motif domain-containing protein 1B	MOUSE	21	53	302.15	0.215	-0.175	-0.026	-0.014	0.407	0.406	0.353	0.08	0.291215	0.999706
S4R2Q2	S4R2Q2|E9QPP6|S4R2N9	Anks1b	Ankyrin repeat and sterile alpha motif domain-containing protein 1B	MOUSE	21	39.8	289.42	-0.152	-0.306	-0.11	-0.333	0.372	0.371	0.292	0.18	0.814597	0.999706
A0A0R4J2A2	A0A0R4J2A2	Anks1b	Ankyrin repeat and sterile alpha motif domain-containing protein 1B	MOUSE	18	41.3	244.19	-0.282	-0.297	-0.354	-0.776	0.019	0.141	0.233	-0.376	0.0323424	0.999706
Q3UHP6	Q3UHP6|P59672|A0A3B2WAQ7|A0A3B2W7H4|A0A3B2W4H6|A0A3B2WCH8|A0A3B2W4B0	Anks1	Ankyrin repeat and SAM domain containing 1	MOUSE	17	15.2	189.27	0.124	-0.088	0.086	-0.077	0.024	-0.024	0.169	-0.017	0.12782	0.999706
Q6ZPU9	Q6ZPU9|H3BIY2|E0CXN7|E0CXJ9|F7DEX6	Kifbp	KIF-binding protein	MOUSE	29	66.9	459.19	-0.032	-0.024	0.136	0.036	0.075	0.035	0.036	0.017	0.727793	0.999706
Q99J31	Q99J31|B1AV64|B1AXS4	Ophn1	Oligophrenin-1	MOUSE	35	50.4	459.17	-0.032	-0.123	-0.067	-0.1	0.082	0.046	0.081	0.087	0.927581	0.999706
P47856	P47856|Q9Z2Z9|D3YYD9	Gfpt1	Glutamine--fructose-6-phosphate aminotransferase [isomerizing] 1	MOUSE	33	56.8	458.95	-0.041	0.082	-0.134	-0.085	0.037	0.103	0.003	-0.09	0.160035	0.999706
P63101	P63101|A0A2I3BQ03|D3YXN6|D3YXF4|O70456	Ywhaz	14-3-3 protein zeta/delta	MOUSE	28	87.7	458.84	0.012	-0.151	0.018	0.003	0.054	0.037	0.069	0.107	0.538724	0.999706
P61982	P61982	Ywhag	14-3-3 protein gamma	MOUSE	26	91.4	379.9	-0.06	-0.221	-0.027	-0.09	0.209	0.068	0.01	0.197	0.640899	0.999706
P62259	P62259|D6REF3|F6WA09	Ywhae	14-3-3 protein epsilon	MOUSE	25	80.3	400.86	0.084	-0.117	0.058	0.017	0.029	0.004	0.086	0.139	0.337875	0.999706
P68254	P68254	Ywhaq	14-3-3 protein theta	MOUSE	25	80	382.78	0.071	-0.169	0.038	0.028	0.002	-0.018	-0.004	0.056	0.41125	0.999706
P68510	P68510	Ywhah	14-3-3 protein eta	MOUSE	22	76.8	349.35	0.009	-0.311	-0.138	-0.06	0.103	0.07	0.049	0.063	0.531006	0.999706
Q9CQV8	Q9CQV8|A2A5N1	Ywhab	14-3-3 protein beta/alpha	MOUSE	21	86.1	341.46	0.034	-0.209	0.04	0.022	0.007	0	0.007	0.097	0.381766	0.999706
Q00493	Q00493	Cpe	Carboxypeptidase E	MOUSE	30	60	458.81	0.081	0.083	0.301	0.411	-0.086	-0.061	0.017	0.334	0.0118245	0.999706
Q99JF5	Q99JF5|A0A1D5RLX3	Mvd	Diphosphomevalonate decarboxylase	MOUSE	29	77.3	458.78	-0.045	-0.087	-0.027	-0.053	0.048	0.078	-0.018	0.085	0.986784	0.999706
Q920R0	Q920R0|A0A087WSC7	Als2	Alsin	MOUSE	37	25.4	458.61	0.038	-0.091	-0.021	-0.019	-0.027	-0.019	0.029	0.022	0.838994	0.999706
Q8CCN6	Q8CCN6|Q60649|E9PY58	Clpb	Caseinolytic peptidase B protein homolog	MOUSE	31	51.4	458.33	0.104	0.119	0.133	0.13	-0.033	-0.052	-0.042	-0.006	0.894329	0.999706
Q14C51	Q14C51|A0A0U1RQ61	Ptcd3	Pentatricopeptide repeat domain-containing protein 3, mitochondrial	MOUSE	32	50.6	458.23	-0.019	0.289	0.053	0.153	-0.095	-0.123	-0.153	-0.13	0.735842	0.999706
O88685	O88685|A2AGN7|B7ZCF1|F6Q2E3	Psmc3	26S proteasome regulatory subunit 6A	MOUSE	31	74.8	458.15	-0.016	-0.067	0.008	0.031	0.009	-0.014	0.004	0.081	0.603021	0.999706
A0A087WPH7	A0A087WPH7	Psmc3	26S proteasome regulatory subunit 6A (Fragment)	MOUSE	19	67.2	296.74	-0.058	-0.135	-0.034	0.044	0.073	0.039	0.041	0.075	0.674743	0.999706
Q6DFW4	Q6DFW4|A0A0A0MQ76|A0A087WQ46|A0A087WSL8|A0A087WSU5|A0A087WP00|A0A087WNW0	Nop58	Nucleolar protein 58	MOUSE	30	61.1	457.97	0.009	0.123	0.079	-0.014	-0.011	0.002	0.051	-0.001	0.606941	0.999706
P05202	P05202	Got2	Aspartate aminotransferase, mitochondrial	MOUSE	33	77.9	457.72	-0.421	0.851	0.962	0.976	-0.086	-0.679	-0.967	-0.597	0.956944	0.999706
G3UXW9	G3UXW9|Q3MIA8|Q99LD4|B1ATU4|A0A140LJB7	Gps1	COP9 signalosome complex subunit 1	MOUSE	32	56.8	457.31	0.084	-0.175	0.05	0.019	0.03	0.082	0.123	0.116	0.544554	0.999706
Q9DB77	Q9DB77|A0A140LI98	Uqcrc2	Cytochrome b-c1 complex subunit 2, mitochondrial	MOUSE	29	82.1	457.14	-0.149	0.352	0.305	0.369	-0.001	-0.202	-0.323	-0.222	0.9493	0.999706
Q9WUM4	Q9WUM4|E9PX03|E9PZJ0|Q920M5|B9EIZ7	Coro1c	Coronin-1C	MOUSE	34	59.9	456.87	-0.072	-0.119	-0.007	-0.128	0.041	-0.01	-0.077	0.011	0.847368	0.999706
E9PVJ1	E9PVJ1	Coro1c	Coronin-1C (Fragment)	MOUSE	4	51.7	50.76	1.436	0.064	-0.045	-0.237	0.126	0.423	1.507	0.07	0.431367	0.999706
Q0VBL3	Q0VBL3	Rbm15	RNA-binding protein 15	MOUSE	37	44.4	455.92	-0.095	-0.217	-0.052	-0.109	0.056	0.013	-0.055	-0.059	0.636633	0.999706
Q6PHZ5	Q6PHZ5|A0A087WPD2	Rbm15b	Putative RNA-binding protein 15B	MOUSE	26	28.2	279.97	-0.101	-0.024	0.02	-0.163	0.02	-0.023	-0.047	-0.106	0.344645	0.999706
Q8R5L3	Q8R5L3	Vps39	Vam6/Vps39-like protein	MOUSE	32	42.3	455.75	-0.022	-0.08	0.005	0	0	-0.005	0.043	0.087	0.66364	0.999706
Q80TL0	Q80TL0	Ppm1e	Protein phosphatase 1E	MOUSE	31	47.7	455.33	-0.05	-0.118	-0.004	0.027	0.057	0.019	0	0.056	0.750766	0.999706
P08249	P08249|A0A0G2JF23|A0A0G2JGY4	Mdh2	Malate dehydrogenase, mitochondrial	MOUSE	28	87.2	455.26	-0.013	0.138	0.115	0.158	-0.03	-0.15	-0.25	-0.033	0.828794	0.999706
A2ANY6	A2ANY6|J3QMC5	Mdn1	Midasin	MOUSE	40	9.3	454.97	0.038	0.362	0.137	0.121	0.011	0.021	0.126	0.097	0.309435	0.999706
Q0VGU4	Q0VGU4|A0A087WQ93	Vgf	Neurosecretory protein VGF	MOUSE	31	48.9	454.85	-0.355	-0.469	-0.176	-0.716	0.481	0.524	0.606	0.159	0.505628	0.999706
Q9D2V7	Q9D2V7|E9PYU1|G3X9L5	Coro7	Coronin-7	MOUSE	30	45.1	454.64	-0.006	-0.049	-0.069	-0.051	0.009	-0.025	-0.109	-0.053	0.473824	0.999706
Q91YJ2	Q91YJ2|A0A338P7D2	Snx4	Sorting nexin-4	MOUSE	32	70.8	454.25	-0.14	-0.203	-0.006	-0.071	0.14	0.002	-0.138	0.09	0.773097	0.999706
Q8CI75	Q8CI75|A0A087WP08	Dis3l2	DIS3-like exonuclease 2	MOUSE	38	47.8	453.99	0.055	-0.111	-0.094	-0.07	0.026	0.041	0.044	0.016	0.825282	0.999706
E9Q1M1	E9Q1M1	Pdzd2	PDZ domain-containing 2	MOUSE	41	16.4	453.9	0.084	-0.059	0.015	-0.139	0.025	0.076	0.1	-0.126	0.146165	0.999706
A0A087WRL4	A0A087WRL4	Pdzd2	PDZ domain-containing 2 (Fragment)	MOUSE	6	17	74.53	0.181	-0.243	-0.227	-0.147	-0.304	-0.007	0.125	-0.055	0.948082	0.999706
Q9WVK8	Q9WVK8|A0A1Y7VM34	Cyp46a1	Cholesterol 24-hydroxylase	MOUSE	33	64.4	453.67	-0.024	0.086	0.003	0.021	0.009	0.038	0.01	0	0.756408	0.999706
B1AQN2	B1AQN2|Q99M80	Ptprt	Protein-tyrosine-phosphatase	MOUSE	36	31.7	453.19	0.163	0.008	0.065	-0.016	-0.076	0.013	0.071	-0.016	0.826946	0.999706
Q68FM4	Q68FM4|P28828|A0A286YDL1|A0A286YCW9	Ptprm	Protein-tyrosine-phosphatase	MOUSE	13	11.5	130.66	0.173	-0.101	0.045	-0.023	0.038	0.121	0.278	0.138	0.504692	0.999706
B1AUH1	B1AUH1|Q3V360	Ptpru	Receptor-type tyrosine-protein phosphatase U	MOUSE	10	9.1	121.19	0.132	-0.076	0.246	0.134	-0.095	0.004	0.101	0.014	0.244613	0.999706
B2RY56	B2RY56|S4R2B0|S4R2A4|S4R2J1	Rbm25	RNA-binding protein 25	MOUSE	35	40.6	453	-0.06	-0.044	0.027	-0.03	0.039	0	0.031	-0.053	0.822247	0.999706
S4R2F7	S4R2F7|S4R1X9	Rbm25	RNA-binding protein 25	MOUSE	5	26.2	51.11	-0.074	0.042	-0.414	-0.309	-0.406	-0.379	-0.288	-0.282	0.168259	0.999706
A0A5F8MPK9	A0A5F8MPK9|Q9EP69|A0A1L1SR59	Sacm1l	Phosphatidylinositol-3-phosphatase SAC1	MOUSE	31	52.7	452.92	0.048	0.095	-0.008	-0.099	0.012	0.041	-0.015	-0.036	0.334379	0.999706
A0A0G2JH17	A0A0G2JH17|K3W4P2|Q6P4S8|A0A0G2JFR3|A0A0G2JDG8	Ints1	Integrator complex subunit 1	MOUSE	39	20.5	452.61	0.025	0.227	0.063	0.023	-0.043	-0.021	-0.05	-0.033	0.589089	0.999706
Q64516	Q64516|B1ASZ3|Q9WU65|Q8C635	Gk	Glycerol kinase	MOUSE	29	70.3	452.53	-0.096	0.222	-0.065	0.038	0.006	-0.062	-0.216	-0.193	0.382623	0.999706
P42227	P42227|B7ZC18	Stat3	Signal transducer and activator of transcription 3	MOUSE	30	51.4	452.53	0.001	0.031	-0.085	0.029	0.064	0.036	0.044	0	0.899084	0.999706
G3UWG2	G3UWG2|Q60610|E9Q1R7|Q6P1D6|J3QQ55|J3QMH1	Tiam1	T-lymphoma invasion and metastasis-inducing protein 1	MOUSE	40	25.5	452.05	0.138	-0.079	0.035	-0.126	0.081	0.082	0.119	-0.021	0.217848	0.999706
E9QK48	E9QK48|Q7TNG5|D6RGM3|A0A0U1RQ42|A0A0U1RPM7	Eml2	Echinoderm microtubule-associated protein-like 2	MOUSE	31	45.6	451.83	-0.017	-0.164	0.013	-0.134	0.076	0.095	0.051	0.002	0.707319	0.999706
Q9WTR5	Q9WTR5	Cdh13	Cadherin-13	MOUSE	30	42.4	451.38	-0.017	-0.076	0.034	-0.001	0.081	-0.013	-0.004	0.099	0.672987	0.999706
Q9D906	Q9D906|A0A0A0MQN4|S4R2T5|S4R2D5|S4R2P7|S4R1T0|S4R1N8|S4R1U3|S4R1W9|S4R1K1	Atg7	Ubiquitin-like modifier-activating enzyme ATG7	MOUSE	35	57.7	450.96	-0.066	0.008	-0.008	0.02	-0.008	-0.001	-0.059	0.058	0.71224	0.999706
Q9D964	Q9D964	Gatm	Glycine amidinotransferase, mitochondrial	MOUSE	29	77	450.94	-0.257	0.279	0.292	0.238	0.026	-0.208	-0.32	-0.199	0.958967	0.999706
A0A0R4J034	A0A0R4J034|Q99K01|D3YZA7	Pdxdc1	Pyridoxal-dependent decarboxylase domain-containing protein 1	MOUSE	30	46.1	450.71	0.174	0.292	0.292	0.302	-0.202	-0.088	-0.14	-0.04	0.697604	0.999706
Q8VDC0	Q8VDC0|A0A1L1SSW1|A0A1L1SQK2	Lars2	Probable leucine--tRNA ligase, mitochondrial	MOUSE	32	45.3	450.43	-0.053	0.246	0.057	0.197	-0.012	-0.035	-0.112	-0.039	0.549424	0.999706
Q6P1F6	Q6P1F6|Q9CWU3|A0A286YDJ9	Ppp2r2a	Serine/threonine-protein phosphatase 2A 55 kDa regulatory subunit B alpha isoform	MOUSE	30	79.1	450.41	-0.097	-0.128	0.079	0.06	0.019	-0.086	-0.114	0.071	0.420465	0.999706
Q925E7	Q925E7|F6RV17|G3UXS9|D6RCH9	Ppp2r2d	Serine/threonine-protein phosphatase 2A 55 kDa regulatory subunit B delta isoform	MOUSE	27	61.8	363.39	0.051	-0.016	0.108	0.21	-0.056	-0.238	-0.133	0.003	0.215247	0.999706
Q8BG02	Q8BG02|A0A0J9YUU0	Ppp2r2c	Serine/threonine-protein phosphatase 2A 55 kDa regulatory subunit B gamma isoform	MOUSE	19	46.9	252.02	-0.031	0.001	0.164	0.11	-0.026	-0.154	-0.545	-0.011	0.70315	0.999706
Q6ZWR4	Q6ZWR4|A0A668KLA9|A0A494B8Z0|A0A494B941	Ppp2r2b	Serine/threonine-protein phosphatase 2A 55 kDa regulatory subunit B beta isoform	MOUSE	18	40.8	221.38	-0.211	-0.041	-0.059	-0.103	0.115	0.031	-0.019	-0.111	0.771325	0.999706
Q3U487	Q3U487	Hectd3	E3 ubiquitin-protein ligase HECTD3	MOUSE	36	51.2	450.24	0.014	0.057	0.046	0.147	0.008	-0.072	-0.066	0.091	0.322622	0.999706
Q9CXY6	Q9CXY6	Ilf2	Interleukin enhancer-binding factor 2	MOUSE	26	78.2	449.18	-0.037	-0.161	-0.063	-0.15	-0.031	0.05	0.027	-0.116	0.442426	0.999706
Q00612	Q00612|A3KG36|P97324|G3UWD6	G6pdx	Glucose-6-phosphate 1-dehydrogenase X	MOUSE	34	70	448.75	-0.008	0.242	0.142	0.156	-0.084	-0.222	-0.214	-0.057	0.940114	0.999706
E9Q4K0	E9Q4K0|Q8BL65|D3Z0Y4|F7A5C5|F6UI99|D3YYR9|F6W6N3	Ablim2	Actin-binding LIM protein 2	MOUSE	33	54.3	448.6	0.04	-0.198	-0.071	-0.172	0.003	0.051	0.007	-0.05	0.530549	0.999706
E9Q0W6	E9Q0W6|F6VVW4	Ablim2	Actin-binding LIM protein 2	MOUSE	30	54.6	427.21	-0.231	-0.507	-0.447	-0.393	-0.1	0.242	-0.087	-0.237	0.398207	0.999706
Q99KG3	Q99KG3	Rbm10	RNA-binding protein 10	MOUSE	34	41.6	448.36	0.032	-0.22	-0.092	-0.177	-0.013	0.021	0.041	-0.057	0.470016	0.999706
Q91YE7	Q91YE7|S4R273|S4R1U7|A0A0A6YX44|S4R184|S4R1V5|S4R1N4|S4R2T4	Rbm5	RNA-binding protein 5	MOUSE	21	25	245.6	0.051	-0.049	0.031	-0.025	0.039	0.037	0.089	-0.097	0.437123	0.999706
J3QNT7	J3QNT7|Q5NCM5|Q5NCM6|F7CUV7|A8Y5D4	Epn2	Epsin-2	MOUSE	30	62.8	448.28	-0.05	-0.292	-0.079	-0.165	-0.064	-0.024	-0.043	-0.08	0.37099	0.999706
Q8CHU3	Q8CHU3	Epn2	Epsin-2	MOUSE	29	65.7	432.3	0.086	-0.002	0.075	-0.359	-0.12	-0.172	-0.154	-0.156	0.248984	0.999706
Q91W69	Q91W69	Epn3	Epsin-3	MOUSE	6	7	72.75	-0.121	-0.441	-0.186	-0.354	0.221	0.25	0.171	0.152	0.86127	0.999706
Q7TMQ7	Q7TMQ7|S4R1X1|D3Z101|D3Z0V8	Wdr91	WD repeat-containing protein 91	MOUSE	33	55	448.24	0.001	-0.084	0.02	0.02	0.06	-0.004	0.061	0.093	0.499189	0.999706
Q9Z2Q6	Q9Z2Q6|B7ZNM7|A0A338P729|A0A338P755|P42209|A0A0U1RQA1	Septin5	Septin-5	MOUSE	32	73.4	448.12	-0.036	-0.155	-0.014	-0.048	0.048	0.001	-0.053	0.064	0.718347	0.999706
A0A338P769	A0A338P769|A0A338P6R8	Septin5	Septin	MOUSE	32	72.4	441.65	-0.028	0.002	0.135	-0.062	0.022	0.031	-0.17	-0.026	0.976579	0.999706
A0A5F8MP96	A0A5F8MP96|P28661|Q5ND13	Septin4	Septin-4	MOUSE	13	13.4	171.67	0.023	-0.018	0.033	-0.095	0.071	0.015	-0.351	0.15	0.613615	0.999706
Q5ND09	Q5ND09	Septin4	Septin-4 (Fragment)	MOUSE	9	33.5	102.64	0.045	-0.628	-0.57	-0.387	-0.353	0.279	-0.091	0.163	0.8016	0.999706
O35526	O35526|D6RFB9|A0A0J9YUA0	Stx1a	Syntaxin-1A	MOUSE	29	78.8	448.05	0.023	-0.015	-0.007	-0.021	-0.015	0.04	0.082	0.013	0.956481	0.999706
P61264	P61264|A0A0U1RNT8	Stx1b	Syntaxin-1B	MOUSE	27	77	440.62	0.016	0.012	-0.013	-0.035	0.001	0.041	0.012	0.069	0.986179	0.999706
P62960	P62960|A2BGG7	Ybx1	Y-box-binding protein 1	MOUSE	30	80.1	447.61	0.104	-0.214	-0.19	-0.186	0.039	0.107	0.067	-0.133	0.382034	0.999706
Q9JKB3	Q9JKB3	Ybx3	Y-box-binding protein 3	MOUSE	20	58.7	241.54	0.036	-0.185	-0.319	-0.487	-0.095	0.146	-0.002	-0.251	0.0988785	0.999706
B2RUF0	B2RUF0|Q9Z2C8|A0A0A0MQD2|J3QNB9	Ybx2	Y box protein 2	MOUSE	10	36.4	135.66	0.047	0.031	0.191	0.049	-0.112	-0.026	-0.143	-0.085	0.97595	0.999706
Q3TML0	Q3TML0|F7DBQ0|Q922R8|Q0V8C4	Pdia6	Protein disulfide-isomerase A6	MOUSE	28	70.1	447.3	-0.157	-0.173	-0.049	-0.071	0.042	-0.097	-0.257	-0.016	0.470496	0.999706
B2RQG2	B2RQG2|A0A087WP76	Phf3	PHD finger protein 3	MOUSE	39	21.7	447.26	0.123	-0.08	0.088	-0.078	0.033	0.105	0.099	-0.021	0.410835	0.999706
Q8BP92	Q8BP92|D6RHL9	Rcn2	Reticulocalbin-2	MOUSE	24	87.8	447.18	-0.006	-0.195	-0.066	-0.107	-0.018	0.036	-0.022	0.025	0.837922	0.999706
Q8BKG3	Q8BKG3	Ptk7	Inactive tyrosine-protein kinase 7	MOUSE	36	38.2	446.51	-0.014	0.123	0.021	0.094	-0.083	-0.055	-0.029	-0.016	0.716672	0.999706
Q8JZK9	Q8JZK9	Hmgcs1	Hydroxymethylglutaryl-CoA synthase, cytoplasmic	MOUSE	27	56.9	446.46	-0.224	-0.118	-0.2	-0.311	0.117	-0.036	-0.28	-0.278	0.0838966	0.999706
P54869	P54869	Hmgcs2	Hydroxymethylglutaryl-CoA synthase, mitochondrial	MOUSE	3	6.4	29.04	0.126	0.103	-0.333	-0.057	0.148	0.226	0.473	0.116	0.87297	0.999706
O70311	O70311|A2AJH3|F7APP3	Nmt2	Glycylpeptide N-tetradecanoyltransferase 2	MOUSE	30	64.8	446.22	-0.114	-0.159	-0.163	-0.119	0.076	0.129	0.119	0.049	0.994712	0.999706
O70310	O70310	Nmt1	Glycylpeptide N-tetradecanoyltransferase 1	MOUSE	29	58.8	398.65	-0.174	-0.316	-0.306	-0.174	0.08	0.139	0.048	-0.07	0.753028	0.999706
P61164	P61164|A0A494BB86|A0A494BAH0	Actr1a	Alpha-centractin	MOUSE	29	77.1	446.22	-0.175	-0.015	0.238	0.133	0.126	-0.198	-0.24	0	0.881828	0.999706
Q8R5C5	Q8R5C5|E0CYB4|E0CZD4	Actr1b	Beta-centractin	MOUSE	26	76.8	405.73	-0.379	0.079	0.23	0.177	0.159	-0.174	-0.477	-0.085	0.950123	0.999706
Q9DC61	Q9DC61|A2AIW9	Pmpca	Mitochondrial-processing peptidase subunit alpha	MOUSE	30	58.7	446.14	-0.11	0.239	0.061	0.135	-0.058	-0.185	-0.199	-0.045	0.782352	0.999706
P51881	P51881	Slc25a5	ADP/ATP translocase 2	MOUSE	31	72.8	446.13	-0.129	0.422	0.079	0.247	0.016	-0.08	-0.246	-0.069	0.530929	0.999706
P48962	P48962	Slc25a4	ADP/ATP translocase 1	MOUSE	27	68.4	426.04	-0.158	0.395	0.07	0.216	-0.085	-0.107	-0.378	-0.248	0.498292	0.999706
Q3V132	Q3V132	Slc25a31	ADP/ATP translocase 4	MOUSE	5	13.7	63.12	0.218	0.313	0.255	0.161	-0.027	-0.153	-0.017	-0.019	0.80978	0.999706
P28658	P28658	Atxn10	Ataxin-10	MOUSE	28	62.1	445.76	0.013	-0.004	-0.117	0.026	0.034	0.098	0.114	0.067	0.922325	0.999706
P62334	P62334	Psmc6	26S proteasome regulatory subunit 10B	MOUSE	32	76.3	445.65	-0.012	-0.069	-0.016	0.009	0.004	0.014	-0.012	0.057	0.87245	0.999706
Q80XL6	Q80XL6|A0A0R4J0I6|D3YTQ5|A0A087WSI8|F6U473	Acad11	Acyl-CoA dehydrogenase family member 11	MOUSE	35	54.4	445.46	0.063	0.094	0.051	0.044	-0.064	0.023	-0.034	-0.081	0.79247	0.999706
Q9CR16	Q9CR16|A0A0A6YW70	Ppid	Peptidyl-prolyl cis-trans isomerase D	MOUSE	29	78.6	445.28	-0.016	-0.103	-0.019	0.024	0.024	-0.002	-0.003	0.13	0.417507	0.999706
D3YWB9	D3YWB9|Q99P47	Cntnap4	Contactin-associated protein-like 4	MOUSE	32	29.2	444.73	0.183	0.042	0.089	-0.133	-0.091	-0.034	-0.007	-0.211	0.148821	0.999706
E9PY62	E9PY62	Cntnap3	Contactin-associated protein-like 3	MOUSE	12	10.2	143	0.13	0.086	0.081	0.034	-0.119	-0.161	-0.085	-0.124	0.950292	0.999706
Q921G7	Q921G7|Q6PF96|Q2KIG0	Etfdh	Electron transfer flavoprotein-ubiquinone oxidoreductase, mitochondrial	MOUSE	33	56	444.64	-0.053	0.205	0.047	0.175	-0.038	-0.134	-0.192	0.003	0.590337	0.999706
E9QNZ2	E9QNZ2|Q7TPV2|F6Z1P8	Dzip3	RING-type E3 ubiquitin transferase	MOUSE	33	27.7	444.48	0.013	-0.073	-0.091	-0.181	-0.026	0.065	0.018	-0.13	0.221196	0.999706
Q8VE19	Q8VE19	Mios	GATOR complex protein MIOS	MOUSE	34	50	444.39	-0.095	0.01	0.047	0.007	0.019	-0.108	-0.228	-0.03	0.868894	0.999706
P68181	P68181|H6TMF5|A0A0G2JFT9	Prkacb	cAMP-dependent protein kinase catalytic subunit beta	MOUSE	30	67.5	444.24	-0.007	-0.101	0.031	-0.031	0.072	0.054	-0.022	0.11	0.908023	0.999706
P05132	P05132	Prkaca	cAMP-dependent protein kinase catalytic subunit alpha	MOUSE	29	67.2	432.22	-0.152	-0.271	-0.191	-0.176	0.069	0.1	-0.087	0.054	0.663141	0.999706
Q9Z2A0	Q9Z2A0|F2Z3X6|Q3TRL2|F2Z400|F2Z3Z9|F2Z4A5|F2Z3V6|F2Z3X9	Pdpk1	3-phosphoinositide-dependent protein kinase 1	MOUSE	33	67.2	443.56	-0.044	-0.102	0.099	-0.057	0.108	-0.01	0.068	-0.002	0.379377	0.999706
P58069	P58069|D3YZE9	Rasa2	Ras GTPase-activating protein 2	MOUSE	36	46.8	443.36	-0.017	-0.103	-0.075	-0.099	0.084	0.07	0.128	-0.012	0.755773	0.999706
A2AL50	A2AL50|Q8C0I1|H3BKN2|A2AL49|H3BIY5	Agps	Alkylglycerone-phosphate synthase	MOUSE	30	53.3	443	-0.014	0.091	0.043	-0.032	-0.01	-0.009	-0.115	-0.081	0.673405	0.999706
Q8BGR3	Q8BGR3|P08414|A0A3Q4EG96	Camk4	Calcium/calmodulin-dependent protein kinase IV	MOUSE	31	67.8	442.81	0.011	-0.155	-0.061	-0.058	0	0.034	0.045	0.012	0.881764	0.999706
A0A0G2JGW6	A0A0G2JGW6|Q3UTQ8|A0A0G2JF79|A0A0G2JFE2	Cdkl5	Cyclin-dependent kinase-like 5	MOUSE	37	40.2	441.95	-0.033	-0.193	-0.12	-0.349	0.098	0.091	0.12	-0.184	0.0615516	0.999706
P49615	P49615|A0A0G2JDL3	Cdk5	Cyclin-dependent-like kinase 5	MOUSE	24	71.9	360.99	-0.049	-0.065	0.017	0.053	0.036	0.006	0.031	0.006	0.874107	0.999706
Q99KJ8	Q99KJ8	Dctn2	Dynactin subunit 2	MOUSE	28	75.3	441.95	-0.001	-0.214	-0.011	-0.069	0.04	0.053	0.04	0.095	0.740503	0.999706
A2AD03	A2AD03|Q3UR39|Q9QXG2	Chm	Rab proteins geranylgeranyltransferase component A	MOUSE	28	67.2	441.62	-0.006	-0.18	-0.087	-0.071	0.015	0.092	0.159	0.016	0.915498	0.999706
Q9QZD5	Q9QZD5|A0A0R4J1A1|A0A1B0GS21	Chml	Rab proteins geranylgeranyltransferase component A 2	MOUSE	8	13.2	93.76	-0.171	-0.268	-0.061	-0.164	-0.055	0.016	-0.093	-0.215	0.346636	0.999706
A0A1B0GSX0	A0A1B0GSX0|P06151|A0A1B0GSR9|D3YZQ9|A0A1B0GQX5|A0A1B0GT41|A0A1B0GSL7|A0A1B0GS79|A0A1B0GRW9|A0A1B0GRC1|P00342|D3YZE4|D3YVR7|A0A1B0GRE9|A0A1B0GSR2	Ldha	L-lactate dehydrogenase	MOUSE	28	81.7	441.3	-0.217	-0.265	0.08	0.033	0.189	0.067	0.013	0.182	0.619252	0.999706
A0A6I8MX27	A0A6I8MX27|P16125|D3Z7F0|A0A0N4SVV8	Ldhb	L-lactate dehydrogenase	MOUSE	24	71.8	382.9	-0.072	-0.098	0.106	0.09	0.041	-0.029	-0.065	0.12	0.410347	0.999706
A0A1B0GRS2	A0A1B0GRS2	Ldha	L-lactate dehydrogenase A chain (Fragment)	MOUSE	5	89.7	82.33	1.35	0.04	-0.514	-0.513	0.208	0.641	1.628	0.757	0.75283	0.999706
Q8QZY1	Q8QZY1|A0A2R8VH97	Eif3l	Eukaryotic translation initiation factor 3 subunit L	MOUSE	30	58.3	440.56	-0.066	-0.305	-0.3	-0.315	0.071	0.099	-0.002	-0.177	0.196802	0.999706
Q8K327	Q8K327	Champ1	Chromosome alignment-maintaining phosphoprotein 1	MOUSE	36	50.3	440.48	0.042	-0.124	-0.021	-0.146	-0.013	-0.004	0.04	-0.114	0.232515	0.999706
Q61753	Q61753|F6ZSB7	Phgdh	D-3-phosphoglycerate dehydrogenase	MOUSE	27	55.5	440.32	0.171	0.332	0.279	0.308	-0.077	-0.115	-0.084	0.061	0.559492	0.999706
Q7TPD0	Q7TPD0|A0A0G2JFJ6	Ints3	Integrator complex subunit 3	MOUSE	29	36.9	440.3	-0.017	0.217	0.014	0.071	-0.094	0.039	-0.057	-0.051	0.194165	0.999706
P50580	P50580	Pa2g4	Proliferation-associated protein 2G4	MOUSE	29	80.4	440.21	-0.076	-0.062	-0.16	-0.081	0.043	0.095	0.042	0.074	0.864635	0.999706
P63037	P63037|B1AXY1|B1AXY0|B1AXX9	Dnaja1	DnaJ homolog subfamily A member 1	MOUSE	29	77.8	440.02	0.002	-0.082	-0.066	-0.015	0.124	0.035	0.034	0.147	0.539929	0.999706
Q3UVC0	Q3UVC0|M0QW59|A0A140LHP4	Ksr2	Kinase suppressor of Ras 2	MOUSE	34	40.7	439.94	0.037	-0.046	0.086	0.049	-0.042	-0.017	-0.002	0.106	0.533122	0.999706
Q61097	Q61097|A0A2I3BR95|Q5SXE4|A0A140LHS5|Q5SXE2|Q5SXE1	Ksr1	Kinase suppressor of Ras 1	MOUSE	29	33.9	386.61	-0.012	-0.075	0.02	0.012	0.039	-0.018	-0.118	-0.037	0.850863	0.999706
E9QM77	E9QM77|O70305|F6U2C2|F7B6X4	Atxn2	Ataxin-2	MOUSE	35	28.9	439.76	-0.112	-0.384	-0.362	-0.369	0.21	0.195	0.075	-0.184	0.283172	0.999706
A0A286YDU2	A0A286YDU2	Atxn2	Ataxin-2 (Fragment)	MOUSE	19	59.4	263.65	0.368	-0.084	-0.114	-0.136	-0.077	0.282	0.406	-0.041	0.751458	0.999706
F6V8M6	F6V8M6	Atxn2	Ataxin-2 (Fragment)	MOUSE	15	19.9	175.34	-0.082	-0.326	-0.242	-0.413	-0.07	-0.094	0.025	-0.483	0.0184917	0.999706
Q99JX7	Q99JX7|V9GXF3|V9GXW3|V9GX96|V9GXM5	Nxf1	Nuclear RNA export factor 1	MOUSE	31	59.2	439.68	0.061	0.214	0.079	0.042	-0.065	-0.044	-0.04	-0.077	0.715245	0.999706
Q8VEH5	Q8VEH5	Epm2aip1	EPM2A-interacting protein 1	MOUSE	34	64	439.45	-0.12	-0.022	-0.111	-0.035	0.081	0.025	-0.086	0.042	0.582562	0.999706
P59325	P59325|Q8BVV6|A0A1Y7VJG2|A0A1Y7VNP4|A0A1Y7VLQ0|A0A1Y7VKT5	Eif5	Eukaryotic translation initiation factor 5	MOUSE	33	62.2	439.37	-0.106	-0.195	-0.137	-0.097	0.024	0.047	0.002	0.039	0.816227	0.999706
P97494	P97494	Gclc	Glutamate--cysteine ligase catalytic subunit	MOUSE	28	58.8	439.28	0.016	-0.095	0.008	0.056	-0.032	-0.016	-0.001	0.066	0.500237	0.999706
P32067	P32067|F6SXM5|A2AR07|D6RI87	Ssb	Lupus La protein homolog	MOUSE	35	65.7	439.04	-0.077	0.235	-0.101	-0.066	-0.052	-0.06	-0.128	-0.151	0.244136	0.999706
Q3UM45	Q3UM45|A0A087WRA7|F6TGJ2	Ppp1r7	Protein phosphatase 1 regulatory subunit 7	MOUSE	26	74.2	439.01	-0.027	-0.117	0.071	0.038	0.062	-0.045	-0.02	0.072	0.415825	0.999706
Q80TL4	Q80TL4|F6SBE4|S4R202|S4R193|S4R1R0|S4R2C8	Phf24	PHD finger protein 24	MOUSE	30	66.2	438.96	0.01	-0.038	0.019	-0.107	0.008	-0.029	0.016	0.007	0.773334	0.999706
E9PVX6	E9PVX6	Mki67	Proliferation marker protein Ki-67	MOUSE	35	15.3	438.73	0.225	0.627	0.091	0.26	-0.145	-0.188	-0.064	0.087	0.675038	0.999706
Q99JX4	Q99JX4|A2A702|A2A701	Eif3m	Eukaryotic translation initiation factor 3 subunit M	MOUSE	26	76.7	438.62	-0.141	-0.356	-0.31	-0.347	0.117	0.163	0.033	-0.131	0.361934	0.999706
Q8C0E2	Q8C0E2	Vps26b	Vacuolar protein sorting-associated protein 26B	MOUSE	30	80.6	438.36	0.006	-0.214	-0.139	-0.121	0.047	0.078	0.075	0.108	0.872121	0.999706
P40336	P40336|A0A1W2P7Z9|A0A1W2P7R7	Vps26a	Vacuolar protein sorting-associated protein 26A	MOUSE	24	81.3	345.18	0.04	-0.069	-0.044	0.004	-0.037	-0.023	-0.054	0.016	0.763868	0.999706
Q9WVJ2	Q9WVJ2|E9Q5I9|E9Q0U1|F6ZQQ3|E9PY93|F6PXS6	Psmd13	26S proteasome non-ATPase regulatory subunit 13	MOUSE	29	85.6	438.02	0.002	-0.088	-0.045	0.023	0.055	0.08	0.068	0.12	0.777335	0.999706
P06837	P06837	Gap43	Neuromodulin	MOUSE	28	88.1	438	0.032	-0.066	0.02	0.06	0.137	0.055	0.031	0.107	0.454941	0.999706
B1AR74	B1AR74|Q8CCN5|Q0VF62|F7C0F2|F7CPM1|B1AR76|Q5SWI1|F6VJ09|B1B0B3	Bcas3	Breast carcinoma-amplified sequence 3 homolog	MOUSE	30	40.6	437.44	-0.069	-0.086	-0.058	-0.066	-0.004	0.043	0.006	0.096	0.928176	0.999706
Q8BJH1	Q8BJH1	Zc2hc1a	Zinc finger C2HC domain-containing protein 1A	MOUSE	37	88.2	437.35	0.034	-0.013	-0.11	-0.08	0.083	0.074	0.078	0.136	0.872512	0.999706
P60229	P60229	Eif3e	Eukaryotic translation initiation factor 3 subunit E	MOUSE	27	71.6	437.22	-0.089	-0.223	-0.282	-0.214	0.094	0.036	-0.082	-0.184	0.123573	0.999706
Q60676	Q60676|F7BX26	Ppp5c	Serine/threonine-protein phosphatase 5	MOUSE	29	59.5	437.1	-0.028	-0.244	0.014	-0.015	0.086	0.044	0.043	0.142	0.456482	0.999706
Q80YA7	Q80YA7|A0A1L1STG9	Dpp8	Dipeptidyl peptidase 8	MOUSE	34	43.4	436.9	0.038	-0.054	0.042	0.026	-0.037	0.018	0.058	0.104	0.657157	0.999706
Q8BVG4	Q8BVG4	Dpp9	Dipeptidyl peptidase 9	MOUSE	15	23	224.69	0.057	-0.011	0.148	0.042	-0.009	0.032	0.066	0.032	0.466417	0.999706
Q3UHD3	Q3UHD3|D3YZ69|D3YUM9|D3YY58	Mtus2	Microtubule-associated tumor suppressor candidate 2 homolog	MOUSE	36	31.7	436.86	0.04	-0.199	-0.078	-0.2	0.009	0.043	0.021	-0.051	0.434666	0.999706
Q505F5	Q505F5|E9PV22|F6YT33|F6Z4L9	Lrrc47	Leucine-rich repeat-containing protein 47	MOUSE	34	71.7	436.75	0.043	-0.05	0.011	-0.02	0.015	0.067	0.006	0.021	0.987896	0.999706
P70451	P70451|A0A3B2W4F1	Fer	Tyrosine-protein kinase Fer	MOUSE	35	46	436.75	0.005	-0.129	-0.021	0.013	-0.004	0.055	0.109	0.1	0.715585	0.999706
Q3TZJ5	Q3TZJ5	Fer	Tyrosine-protein kinase	MOUSE	30	53.7	393.42	0.056	-0.07	-0.062	-0.093	0.011	0.137	0.161	0.224	0.963515	0.999706
Q99JI4	Q99JI4|A0A286YDW8	Psmd6	26S proteasome non-ATPase regulatory subunit 6	MOUSE	29	70.6	436.37	0.052	-0.229	-0.089	-0.011	0.087	0.132	0.166	0.244	0.611106	0.999706
O35344	O35344	Kpna3	Importin subunit alpha-4	MOUSE	28	64.6	436.33	-0.035	-0.231	-0.092	-0.117	0.051	0.065	0.088	0.075	0.826018	0.999706
A0A0B4J1E7	A0A0B4J1E7|O35343|D3YTN1	Kpna4	Importin subunit alpha-3	MOUSE	25	44.3	403.54	0.127	-0.072	0.118	0.075	-0.009	0.01	-0.011	0.135	0.48794	0.999706
P54822	P54822|E9Q242|E9Q3T7|A0A140LHU1|E9Q0A0|A0A0G2JFI8|A0A0G2JFL8	Adsl	Adenylosuccinate lyase	MOUSE	31	71	436.32	0.014	0.007	0.118	0.116	-0.029	-0.06	-0.078	0.047	0.609219	0.999706
H3BL37	H3BL37|O08784|H3BIX0|F6R3V4|H3BK88	Tcof1	Treacle protein	MOUSE	36	27.5	436.31	0.182	0.081	0.055	-0.004	-0.076	-0.015	-0.006	-0.097	0.728478	0.999706
P35585	P35585|D3YZ71|A0A1D5RLW6|A0A0R4J1L4|A0A0R4IZX6|Q9WVP1|S4R1Q4|A0A1L1SUA0|A0A1D5RMJ1|A0A1D5RLL9	Ap1m1	AP-1 complex subunit mu-1	MOUSE	29	73.9	435.71	0.014	-0.24	-0.098	-0.075	0.113	0.064	0.009	0.067	0.531493	0.999706
Q8BG40	Q8BG40|A0A1D5RMH5	Katnb1	Katanin p80 WD40 repeat-containing subunit B1	MOUSE	33	55.4	435.61	-0.104	-0.075	0.004	0.037	0.023	-0.021	0.023	0.016	0.715258	0.999706
Q9JKK7	Q9JKK7|A0A1L1SU70|A0A1L1SRR7	Tmod2	Tropomodulin-2	MOUSE	28	70.3	435.21	-0.016	-0.269	-0.093	-0.111	0.06	0.029	0.024	0.079	0.561277	0.999706
Q3UYV9	Q3UYV9	Ncbp1	Nuclear cap-binding protein subunit 1	MOUSE	30	49.3	434.92	-0.127	0.288	0.01	-0.008	-0.023	0.088	0.008	0.029	0.122378	0.999706
E9PWW9	E9PWW9|A0A0U1RPA7|A0A0U1RP31	Rsf1	Remodeling and spacing factor 1	MOUSE	36	30.5	434.91	0.055	-0.034	0.015	-0.014	-0.034	0.006	0.052	0.009	0.948535	0.999706
E9PYH0	E9PYH0|Q62059|G3XA35|E9QMK2|E9QMK3|Q8BS97|F7B603|E0CZC0	Vcan	Versican core protein	MOUSE	33	11.3	434.83	-0.1	-0.26	-0.15	-0.128	0.056	0.099	0.056	0.067	0.913156	0.999706
Q9DBF1	Q9DBF1|G3UYR8|G3UY72|E9Q1H3|E9Q1G1	Aldh7a1	Alpha-aminoadipic semialdehyde dehydrogenase	MOUSE	27	66.4	434.44	-0.107	0.045	0.081	0.218	0.011	-0.064	-0.059	0.058	0.338229	0.999706
P15209	P15209|A0A286YDA3|A0A286YCV8|A0A286YDA0	Ntrk2	BDNF/NT-3 growth factors receptor	MOUSE	29	46.4	434.34	-0.082	-0.009	-0.054	-0.181	0.085	0.026	-0.026	-0.067	0.341659	0.999706
A0A0A6YWF9	A0A0A6YWF9|A0A0A6YWL7|A0A0U1RNS2	Ntrk3	Tyrosine-protein kinase receptor	MOUSE	24	34.8	340.2	0.015	-0.02	0.015	-0.237	0.046	0.074	0.098	-0.099	0.0593478	0.999706
P60879	P60879	Snap25	Synaptosomal-associated protein 25	MOUSE	27	82.5	434.17	0.09	0.037	0.089	-0.058	0.05	0.001	0.079	-0.077	0.156969	0.999706
Q9D3L3	Q9D3L3|O09044|B0R030|E9Q8A1|B0R029	Snap23	Synaptosomal-associated protein	MOUSE	8	52.4	111.66	-0.055	0.165	0.057	0.047	-0.007	0.023	0.12	-0.055	0.385109	0.999706
Q8CDA1	Q8CDA1	Inpp5f	Phosphatidylinositide phosphatase SAC2	MOUSE	38	33.9	433.96	-0.044	-0.144	-0.098	-0.091	-0.006	0.02	0.045	-0.009	0.868563	0.999706
E9PU87	E9PU87|Q6P4S6|F6U6U5|F6U8X4|F6SBP3	Sik3	Non-specific serine/threonine protein kinase	MOUSE	33	28.4	433.92	0.009	-0.122	-0.189	-0.195	0.111	0.164	0.194	0.06	0.827051	0.999706
Q8R326	Q8R326|F7D909	Pspc1	Paraspeckle component 1	MOUSE	34	58.8	433.47	-0.062	-0.124	-0.082	-0.102	0.006	0.026	-0.035	-0.121	0.513842	0.999706
Q9CRC8	Q9CRC8|A0A0R4J0W6|D6RHB1|F6RDA7|F6RGS7|A0A0G2JGC9|D6RFC5	Lrrc40	Leucine-rich repeat-containing protein 40	MOUSE	31	63.1	433.07	-0.123	0.149	0.178	0.126	-0.003	-0.107	-0.245	0.008	0.878039	0.999706
Q80TF3	Q80TF3|E9Q5E1|A2AGW4	Pcdh19	Protocadherin-19	MOUSE	36	37.7	433.07	0.06	-0.034	-0.051	-0.14	-0.021	-0.017	-0.021	-0.116	0.231712	0.999706
Q9JIS5	Q9JIS5	Sv2a	Synaptic vesicle glycoprotein 2A	MOUSE	26	33.8	432.97	-0.082	0.089	-0.013	0.056	-0.06	-0.03	-0.035	-0.111	0.707861	0.999706
Q9D415	Q9D415|D3Z709|D3Z508|D3Z6F4|Q3UVU8|A0A3B2WD59	Dlgap1	Disks large-associated protein 1	MOUSE	40	36.2	432.68	0.112	-0.1	0.075	0.101	0.071	0.147	0.199	0.287	0.229113	0.999706
A0A3B2W7Z1	A0A3B2W7Z1|E9QAR5	Dlgap1	Disks large-associated protein 1 (Fragment)	MOUSE	32	42	349.4	-0.042	-0.14	-0.316	0.039	-0.194	0.015	-0.067	-0.15	0.523222	0.999706
Q80X50	Q80X50|A0A0G2JDV6|A0A0H2UH17|A0A0G2JFN7|A0A0G2JG47|A0A0G2JGD0|A0A0G2JEC6|A0A0G2JDT1|A0A0G2JE24	Ubap2l	Ubiquitin-associated protein 2-like	MOUSE	27	32.7	432.23	-0.091	-0.472	-0.304	-0.432	0.193	0.197	0.049	-0.141	0.294522	0.999706
Q5U458	Q5U458|E9Q8B3|A2A8D1	Dnajc11	DnaJ homolog subfamily C member 11	MOUSE	31	58.4	432.09	-0.029	0.353	-0.007	0.173	-0.081	-0.129	-0.282	-0.242	0.511877	0.999706
Q3TWN3	Q3TWN3	Cnnm2	Metal transporter CNNM2	MOUSE	31	42.8	431.91	0.011	0.01	0.006	-0.072	0.025	-0.024	0.006	-0.043	0.716689	0.999706
Q69ZF7	Q69ZF7	Cnnm4	Metal transporter CNNM4	MOUSE	26	38.6	331.99	0.041	0.034	0.035	0.08	-0.009	-0.01	0.056	-0.018	0.93229	0.999706
Q32NY4	Q32NY4	Cnnm3	Metal transporter CNNM3	MOUSE	16	30.7	224.2	0.02	0.159	0.198	0.052	0.028	0.003	-0.056	0.07	0.822225	0.999706
A0A286YDL2	A0A286YDL2|Q0GA42	Cnnm1	Metal transporter CNNM1	MOUSE	14	14.5	162.42	-0.06	-0.067	-0.002	-0.16	0.112	0.055	0.205	0.09	0.558629	0.999706
P26450	P26450|A0A087WQM2|P70305	Pik3r1	Phosphatidylinositol 3-kinase regulatory subunit alpha	MOUSE	32	47.9	431.89	-0.041	-0.056	-0.067	-0.007	0.02	0.078	0.032	0.089	0.893677	0.999706
Q80UI5	Q80UI5	Pik3r1	Phosphatidylinositol 3-kinase regulatory subunit alpha	MOUSE	24	51.7	302.42	-0.116	-0.031	0.07	0.159	0.102	0.075	-0.257	0.207	0.363794	0.999706
O08908	O08908|F7CB91	Pik3r2	Phosphatidylinositol 3-kinase regulatory subunit beta	MOUSE	16	24.6	210.1	0.07	-0.104	-0.001	-0.083	-0.014	-0.152	-0.079	-0.082	0.163839	0.999706
A0A1L1ST33	A0A1L1ST33|Q64143|B1AUG0|B1AUF8	Gm49337	Predicted gene, 49337	MOUSE	7	13.9	69.22	-0.427	-0.76	-0.952	-0.713	-0.045	0.221	-0.165	0.196	0.334786	0.999706
Q91WG7	Q91WG7|Q8C413|F2Z409	Dgkg	Diacylglycerol kinase gamma	MOUSE	32	48.8	431.88	-0.08	-0.116	-0.001	0.046	0.118	0.024	0.051	0.187	0.351396	0.999706
Q8BWY3	Q8BWY3	Etf1	Eukaryotic peptide chain release factor subunit 1	MOUSE	27	65.9	431.22	-0.073	-0.093	0.012	0.034	0.071	-0.027	-0.098	0.052	0.687106	0.999706
Q7TME0	Q7TME0|A0A0G2JGY9	Plppr4	2-lysophosphatidate phosphatase PLPPR4	MOUSE	30	46.9	430.91	0.085	-0.061	-0.053	-0.299	-0.019	0.045	-0.004	-0.158	0.0656051	0.999706
Q80YS6	Q80YS6|E9Q8X9	Afap1	Actin filament-associated protein 1	MOUSE	31	44.5	430.72	0.01	-0.297	-0.057	-0.38	0.117	0.121	0.025	-0.118	0.159953	0.999706
A0A1D5RLL0	A0A1D5RLL0	Afap1	Actin filament-associated protein 1 (Fragment)	MOUSE	6	43.7	89.4	-0.093	-0.194	-0.109	-0.337	0.113	-0.018	-0.232	-0.188	0.0904039	0.999706
Q91ZJ5	Q91ZJ5	Ugp2	UTP--glucose-1-phosphate uridylyltransferase	MOUSE	29	64.1	430.71	0.003	-0.124	0.073	0.071	0.057	-0.044	-0.12	0.083	0.430354	0.999706
Q544X6	Q544X6|A0A494BAI5|P22315|F6T2S0|Q91W09|A0A494B9Y8|A0A494BBL4|A0A494BAR8|A0A494BA61	Fech	Ferrochelatase	MOUSE	32	66.3	430.71	-0.193	0.249	0.083	0.204	-0.026	-0.195	-0.326	-0.098	0.741414	0.999706
Q9JJK2	Q9JJK2|F6RJV6	Lancl2	LanC-like protein 2	MOUSE	27	73.5	430.64	-0.047	-0.166	-0.147	-0.123	0.079	0.041	0.071	0.084	0.862426	0.999706
O88544	O88544|F6QTS1|D3YV99|D3Z1R9	Cops4	COP9 signalosome complex subunit 4	MOUSE	26	79.8	430.55	-0.099	-0.197	-0.012	0.003	0.048	-0.049	-0.104	0.077	0.380903	0.999706
Q3U186	Q3U186|A2AT41	Rars2	Probable arginine--tRNA ligase, mitochondrial	MOUSE	29	60	430.23	-0.018	0.382	0.045	0.185	-0.091	-0.077	-0.177	-0.128	0.463135	0.999706
A0A5F8MPB5	A0A5F8MPB5|Q61739	Itga6	Integrin alpha-6	MOUSE	34	35.2	430.14	0.112	0.196	0.051	0.131	-0.083	-0.119	-0.098	-0.118	0.970964	0.999706
F6VSK8	F6VSK8	Itga6	Integrin alpha-6 (Fragment)	MOUSE	23	40.3	291.77	-0.327	0.127	0.093	-0.083	-0.083	-0.274	-0.182	-0.169	0.648032	0.999706
Q8BFU3	Q8BFU3|A0A1L1SQE1|E0CZF4	Rnf214	RING finger protein 214	MOUSE	33	49.4	430.07	-0.002	-0.202	-0.153	-0.148	0.096	0.108	0.042	0.047	0.743021	0.999706
Q6A009	Q6A009|Q14B86	Ltn1	E3 ubiquitin-protein ligase listerin	MOUSE	36	22.3	430.05	-0.01	0.126	-0.173	-0.008	0.023	0.072	0.09	-0.046	0.595827	0.999706
Q8K224	Q8K224|A2BH46|E9Q498	Nat10	RNA cytidine acetyltransferase	MOUSE	33	37.1	430.02	0.082	0.335	0.063	0.095	-0.127	-0.031	-0.008	-0.096	0.476745	0.999706
Q9D071	Q9D071|F7C9N6|E9PW47|F7A0X7|E9Q5T0|F6RGK4|F6TJQ8	Mms19	MMS19 nucleotide excision repair protein homolog	MOUSE	28	40.3	429.78	0.023	0.085	0.035	0.094	-0.082	-0.018	0.026	0.042	0.604232	0.999706
Q7TPM6	Q7TPM6	Fsd1	Fibronectin type III and SPRY domain-containing protein 1	MOUSE	27	62	429.74	0.022	-0.003	0.111	0.079	-0.073	-0.061	-0.053	0.106	0.450924	0.999706
Q9CXT8	Q9CXT8|D3Z1T9|F7BPA5	Pmpcb	Mitochondrial-processing peptidase subunit beta	MOUSE	25	60.5	429.46	-0.086	0.234	0.05	0.183	-0.046	-0.07	-0.13	0	0.458262	0.999706
Q61361	Q61361|A0A0A6YW95	Bcan	Brevican core protein	MOUSE	33	45	429.34	-0.137	-0.144	-0.058	-0.005	0.018	-0.037	0.06	0.131	0.286576	0.999706
A2AJI0	A2AJI0|A8Y5P4|A2AJI1|F6WF36	Map7d1	MAP7 domain-containing protein 1	MOUSE	33	46.3	429.22	0.017	-0.011	-0.123	-0.165	0.004	0.04	0.023	-0.021	0.514696	0.999706
P97390	P97390	Vps45	Vacuolar protein sorting-associated protein 45	MOUSE	34	53.6	429.06	-0.08	-0.12	-0.106	-0.111	0.093	-0.002	0.026	0.03	0.814281	0.999706
Q9DBE8	Q9DBE8|F6RBY3	Alg2	Alpha-1,3/1,6-mannosyltransferase ALG2	MOUSE	28	68.1	428.8	-0.114	-0.029	-0.064	-0.094	0.008	-0.069	-0.15	-0.116	0.462528	0.999706
P70663	P70663|A0A0G2JFH7	Sparcl1	SPARC-like protein 1	MOUSE	29	49.5	427.86	0.071	0.059	0.17	0.097	-0.029	0.017	0.089	0.093	0.244261	0.999706
Q9CYR6	Q9CYR6|Q8BWW3	Pgm3	Phosphoacetylglucosamine mutase	MOUSE	29	56	427.54	0.07	-0.041	0.105	0.154	-0.023	-0.032	-0.044	0.045	0.433532	0.999706
Q3ULJ0	Q3ULJ0|D3Z0L6	Gpd1l	Glycerol-3-phosphate dehydrogenase 1-like protein	MOUSE	27	78.6	427.42	-0.058	-0.025	0.158	0.155	0.099	-0.049	-0.05	0.135	0.390545	0.999706
P13707	P13707|E0CXN5	Gpd1	Glycerol-3-phosphate dehydrogenase [NAD(+)], cytoplasmic	MOUSE	23	75	296.06	0.038	0.276	0.121	0.17	-0.138	-0.246	-0.106	-0.03	0.910662	0.999706
Q9QUG9	Q9QUG9|D3Z2F9|D3YXD6|D6RDD3|D3YZP2|D3YZX2|D3Z3N3	Rasgrp2	RAS guanyl-releasing protein 2	MOUSE	31	53.7	427.4	-0.118	-0.102	-0.097	-0.013	0.033	-0.024	-0.108	0.004	0.511935	0.999706
Q5SRX1	Q5SRX1|Q5SXA4|Q5SXA5|F6ZDJ1	Tom1l2	TOM1-like protein 2	MOUSE	27	69.2	427.05	-0.005	-0.061	0.066	0.046	0.008	-0.023	-0.055	0.153	0.442961	0.999706
F6RBX1	F6RBX1	Tom1l2	TOM1-like protein 2 (Fragment)	MOUSE	9	39.6	121.83	0.037	0.157	0.277	0.43	0.111	-0.241	-0.468	0.086	0.485406	0.999706
Q9DC23	Q9DC23	Dnajc10	DnaJ homolog subfamily C member 10	MOUSE	32	43.7	427.03	-0.083	-0.079	-0.016	-0.15	0.041	-0.018	-0.12	-0.198	0.230227	0.999706
Q8C170	Q8C170|D3Z3A8	Myo9a	Unconventional myosin-IXa	MOUSE	39	16.3	426.89	0.011	-0.061	-0.073	0.004	0.048	0.078	0.016	0.002	0.928264	0.999706
Q921W7	Q921W7|Q3ULB1|P47226|D6RH72|B1AXB9|A2ALC6	Tes	Testin	MOUSE	29	70.8	425.05	-0.017	-0.142	0.001	0.016	0.004	0.007	-0.036	0.043	0.702641	0.999706
Q505D1	Q505D1|A0A2I3BQ07|A0A2I3BQJ1|A0A2I3BRN1	Ankrd28	Serine/threonine-protein phosphatase 6 regulatory ankyrin repeat subunit A	MOUSE	28	39.3	425.01	-0.03	-0.01	-0.011	-0.027	0.021	0.004	-0.052	0.083	0.918545	0.999706
B2RXR6	B2RXR6|E9QNQ2|J3QK13|J3QNJ4|J3QK37	Ankrd44	Serine/threonine-protein phosphatase 6 regulatory ankyrin repeat subunit B	MOUSE	18	26	276.42	0.087	0.058	0.099	-0.007	0.011	0.028	0.038	0.062	0.795572	0.999706
Q80T41	Q80T41|A0A0U1RQ90	Gabbr2	Gamma-aminobutyric acid type B receptor subunit 2	MOUSE	32	35.6	424.98	0.081	0.041	0.018	0.01	0.033	0.012	0	0.057	0.846486	0.999706
Q8BH74	Q8BH74|E9Q4V9|A0A1W2P7R1	Nup107	Nuclear pore complex protein Nup107	MOUSE	31	37.6	424.85	0.089	0.108	0.015	-0.051	0.013	0.076	0.114	0.039	0.551637	0.999706
D3YYT1	D3YYT1|Q922P9	Glyr1	Glyoxylate reductase 1 homolog	MOUSE	28	61.7	424.73	-0.008	0.137	0.031	0.003	-0.11	-0.134	-0.16	-0.212	0.657644	0.999706
Q8CC35	Q8CC35|E9Q3E2	Synpo	Synaptopodin	MOUSE	29	44.4	424.4	-0.097	-0.391	-0.272	-0.456	0.056	0.064	0.118	0.003	0.434712	0.999706
Q8BHL3	Q8BHL3|A0A0U1RPN1	Tbc1d10b	TBC1 domain family member 10B	MOUSE	30	37.8	424.23	-0.001	-0.116	-0.071	-0.021	0.033	0.019	0.063	0.044	0.866188	0.999706
P24547	P24547|A0A0A6YY72|A0A0A6YXS4	Impdh2	Inosine-5'-monophosphate dehydrogenase 2	MOUSE	26	66.7	424.01	-0.007	0.046	0.047	0.06	0.029	-0.022	-0.078	0.117	0.618931	0.999706
F7DEU6	F7DEU6|P50096|E0CYE2|F6XXH9|E0CXK0	Impdh1	Inosine-5'-monophosphate dehydrogenase	MOUSE	21	54.2	315.95	-0.052	-0.189	-0.044	-0.069	0.059	0.054	-0.044	0.085	0.833717	0.999706
Q5DQR4	Q5DQR4	Stxbp5l	Syntaxin-binding protein 5-like	MOUSE	30	34.5	423.87	-0.076	-0.11	-0.093	-0.119	0.052	0.046	0.001	-0.007	0.842899	0.999706
P14576	P14576|E9PXC0|A0A1Y7VJJ0|A0A1W2P809	Srp54	Signal recognition particle 54 kDa protein	MOUSE	28	70.6	423.85	-0.24	-0.075	-0.148	-0.131	0.099	-0.014	-0.099	-0.036	0.680254	0.999706
Q9CZU6	Q9CZU6|Q80X68	Cs	Citrate synthase, mitochondrial	MOUSE	25	57.3	423.7	-0.048	0.217	0.06	0.15	0.024	-0.079	-0.127	0.05	0.635852	0.999706
Q5ND34	Q5ND34|K4DI77|F6XD87	Wdr81	WD repeat-containing protein 81	MOUSE	33	21.6	423.44	0.039	0.018	0.005	0.053	-0.036	0.01	-0.03	0.024	0.913139	0.999706
Q62418	Q62418	Dbnl	Drebrin-like protein	MOUSE	30	67.2	423.28	-0.014	-0.18	-0.087	-0.148	0.069	0.121	0.087	0.002	0.809573	0.999706
O54916	O54916|E9Q632|D3Z2E3|F6R6F1|D6RIN6|F6YT69|F7AB82|A0A1L1SRE4	Reps1	RalBP1-associated Eps domain-containing protein 1	MOUSE	32	42.8	422.83	-0.002	-0.106	0.009	-0.093	0.004	0.001	0	0.03	0.86564	0.999706
B9EI38	B9EI38|A2AFI8|Q80XA6	Reps2	RalBP1-associated Eps domain-containing protein 2	MOUSE	21	45.2	263.47	0.084	-0.099	0.034	-0.036	0.005	0.076	0.078	0.071	0.874195	0.999706
Q5U3K5	Q5U3K5	Rabl6	Rab-like protein 6	MOUSE	29	44.1	422.72	0.048	-0.097	0.066	0.038	0.019	0.071	0.04	0.042	0.848825	0.999706
P70188	P70188	Kifap3	Kinesin-associated protein 3	MOUSE	30	37.8	422.3	-0.007	-0.126	-0.149	-0.009	0.06	0.075	0.016	0.104	0.597877	0.999706
P84309	P84309	Adcy5	Adenylate cyclase type 5	MOUSE	32	27.4	422.29	0.075	0.064	0.069	0.011	-0.054	0.036	-0.021	0.007	0.92685	0.999706
A0A2I3BRC5	A0A2I3BRC5|Q01341|F8VQ52|A0A2I3BRS6|A0A2I3BQ20|A0A2I3BS04	Adcy6	Adenylate cyclase type 6	MOUSE	24	21.6	285.2	0.016	0.068	0.063	0.031	0.119	0.072	0.065	0.053	0.653332	0.999706
Q7TQK5	Q7TQK5|E9QAD4	Ccdc93	Coiled-coil domain-containing protein 93	MOUSE	32	52.7	422.27	-0.028	-0.173	-0.089	-0.046	0.027	0.008	0.009	-0.009	0.71273	0.999706
Q80YE7	Q80YE7	Dapk1	Death-associated protein kinase 1	MOUSE	36	25.9	422.23	0.087	0.072	0.061	0.157	-0.033	-0.039	0.037	0.09	0.37048	0.999706
E9QK62	E9QK62|Q8CHT1|F6SWQ9	Ngef	Ephexin-1	MOUSE	33	47	422.22	-0.056	-0.126	-0.129	-0.072	0.226	0.276	0.178	0.044	0.850261	0.999706
[truncated: 7,645 more rows]

## Sheet: S1B. TTX_Phosphoproteome
										log2 TMT ratios to control
ID	Primary_accession	Redundant_accessions	Gene	Protein_name	Phosphosite	Peptide_sequence	Species	Peptide_score	Ambiguous_ptm_localization	Rep1_5min	Rep1_1hr	Rep1_7hr	Rep1_24hr	Rep2_5min	Rep2_1hr	Rep2_7hr	Rep2_24hr	P_value	Adjusted_p_value
Map2_P20357_T473tS476s_2_1_471_476	P20357	G3UZK9|P20357|G3UZE9|A0A668KLC6	Map2	Microtubule-associated protein 2	T473t S476s	TGVIQTStEQsFSK	MOUSE	11.02	TRUE	-1.242	-3.34	-3.517	-1.892	-1.026	-3.139	-3.415	-2.198	7.00693e-08	0.000793116
Tnks1bp1_P58871_S911sS912s_2_2_911_912	P58871	P58871|Z4YJL4|A0A571BEG9	Tnks1bp1	182 kDa tankyrase-1-binding protein	S911s S912s	GYssQDAEEQDREFEK	MOUSE	9.16	FALSE	-0.463	-1.976	-2.474	-1.759	-0.45	-2.123	-2.322	-1.899	9.96377e-08	0.000793116
Magi2_Q9WVQ1_S768s_1_0_768_769	Q9WVQ1	Q9WVQ1|A0A140LHB5|A0A0G2JE00	Magi2	Membrane-associated guanylate kinase, WW and PDZ domain-containing protein 2	S768s	MDsSGPDYK	MOUSE	10.15	TRUE	-0.719	-2.305	-2.127	-1.737	-0.715	-2.239	-2.174	-1.77	3.53418e-08	0.000793116
Obscn_A2AAJ9_S3622s_1_1_3622_3622	A2AAJ9	A2AAJ9|P30554|E9QQ96|Z4YJE4	Obscn	Obscurin	S3622s	FREsLK	MOUSE	6.53	FALSE	-0.89	-2.53	-3.039	-2.213	-0.684	-2.431	-2.657	-1.924	7.83207e-08	0.000793116
Dbn1_Q9QXS6_S241s_1_1_241_241	Q9QXS6	Q9QXS6|A0A0R4J1E3	Dbn1	Drebrin	S241s	QQsLEAEEAK	MOUSE	10.4	FALSE	-0.312	-2.193	-2.853	-2.468	-0.015	-2.028	-2.408	-2.472	1.31751e-07	0.000838991
Bsn_O88737_S263s_1_1_263_263	O88737	O88737	Bsn	Protein bassoon	Q253q S263s	qPLGKPEQERsPR	MOUSE	10.32	FALSE	0.07	0.688	1.839	1.994	0.359	0.962	1.867	2.022	4.8913e-07	0.000844027
Map2_P20357_S764s_1_1_764_764	P20357	P20357|A0A668KLC6	Map2	Microtubule-associated protein 2	S764s	MPCFPIEsKEEEDK	MOUSE	8.46	FALSE	-1.33	-2.771	-2.98	-2.125	-0.845	-2.649	-2.538	-2.09	4.84301e-07	0.000844027
Tacc2_Q9JJG0_S514sT516tT521t_3_2_510_521	Q9JJG0	Q9JJG0|E9Q9Z4|A0A140LIJ2|A0A668KLD4|A0A140LIQ1|E9Q8T1|A0A140LI86|A0A140LIQ6|A0A140LJ29|A0A140LJA0|E9QL08	Tacc2	Transforming acidic coiled-coil-containing protein 2	S514s T516t T521t	LDNTPASPPRsPtEPSDtPIAK	MOUSE	9.83	TRUE	-0.665	-2.29	-2.256	-2.039	-0.563	-1.986	-2.147	-2.126	1.94151e-07	0.000844027
Ehbp1_Q69ZW3_S222s_1_0_221_222	Q69ZW3	Q69ZW3	Ehbp1	EH domain-binding protein 1	S222s	ITEIVNQLNALSsLDEDQDDCIK	MOUSE	23.26	TRUE	-0.419	-1.601	-1.975	-1.846	-0.306	-1.504	-1.865	-1.569	2.63873e-07	0.000844027
Rtn3_Q9ES97_S233s_1_1_233_233	Q9ES97	Q9ES97	Rtn3	Reticulon-3	S233s	DSPEsPFEVIIDK	MOUSE	17.1	FALSE	0.515	-0.788	-1.318	-1.518	0.333	-0.848	-1.317	-1.574	2.2193e-07	0.000844027
Wdr44_Q6NVE8_S264s_1_1_264_264	Q6NVE8	Q6NVE8	Wdr44	WD repeat-containing protein 44	S264s	KKsELEFEALK	MOUSE	11.22	FALSE	-0.731	-1.801	-1.994	-1.309	-0.657	-1.796	-1.884	-1.434	3.07332e-07	0.000844027
Arhgef7_Q9ES28_S673s_1_1_673_673	Q9ES28	Q9ES28|D3Z0V2|A0A0R4J0X8	Arhgef7	Rho guanine nucleotide exchange factor 7	S673s	KPsDEEFAVR	MOUSE	10.59	FALSE	-0.387	-1.933	-1.905	-1.61	-0.592	-1.819	-1.808	-1.514	5.30168e-07	0.000844027
Stxbp5_D3Z079_S1023s_1_1_1023_1023	D3Z079	Q8K400|D3Z2Q2|D3Z079	Stxbp5	Syntaxin-binding protein 5	S1023s	GLFGGGAQsLDREELFGESSSGK	MOUSE	18.84	FALSE	-0.775	-2.201	-2.375	-1.979	-0.509	-2.311	-2.13	-1.823	2.8001e-07	0.000844027
Hivep2_Q3UHF7_S71s_1_1_71_71	Q3UHF7	Q3UHF7|A0A087WQF9	Hivep2	Transcription factor HIVEP2	S71s	LAsPGEGLHQVTEK	MOUSE	15.47	FALSE	0.239	0.401	1.077	2.349	0.087	0.423	0.983	2.046	4.74163e-07	0.000844027
Hivep2_Q3UHF7_S620s_1_1_620_620	Q3UHF7	Q3UHF7	Hivep2	Transcription factor HIVEP2	S620s	GLAsPSLK	MOUSE	10.81	FALSE	-0.079	0.077	0.96	2.439	0.186	0.441	0.933	2.52	4.1326e-07	0.000844027
Tbc1d5_A0A286YDB3_S630s_1_1_630_630	A0A286YDB3	Q80XQ2|A0A286YDB3	Tbc1d5	TBC1 domain family member 5	S630s	KEsEEELEAQISFLQGQLNDLDAMCK	MOUSE	23.39	FALSE	-0.27	-0.589	-2.618	-3.078	-0.04	-0.18	-2.012	-3.077	3.39727e-07	0.000844027
Tbc1d5_A0A286YDB3_S600sS604s_2_2_600_604	A0A286YDB3	Q80XQ2|A0A286YDB3	Tbc1d5	TBC1 domain family member 5	S600s S604s	EFTGsPPPsATKK	MOUSE	9.56	FALSE	-0.605	-1.773	-1.572	-1.575	-0.611	-1.646	-1.553	-1.456	3.72792e-07	0.000844027
Rell2_Q8BRJ3_S272s_1_1_272_272	Q8BRJ3	Q8BRJ3|Q8CFT0|H3BJY5|E9PX33	Rell2	RELT-like protein 2	S272s	GRDPsPGLSSQEANGQPTK	MOUSE	15.69	FALSE	0.11	0.899	1.565	2.087	0.035	0.557	1.42	1.911	5.13292e-07	0.000844027
Cnr1_P47746_S426sS430s_2_2_426_430	P47746	P47746	Cnr1	Cannabinoid receptor 1	S426s S430s	SMFPSCEGTAQPLDNsMGDsDCLHK	MOUSE	19.45	FALSE	0.057	-1.079	-1.908	-1.314	-0.258	-1.198	-1.999	-1.421	4.91816e-07	0.000844027
Trim32_Q8CH72_S348s_1_0_347_348	Q8CH72	Q8CH72	Trim32	E3 ubiquitin-protein ligase TRIM32	S348s	SsEAASGIQQCLFLK	MOUSE	16.41	TRUE	-0.258	-0.891	-1.761	-1.667	-0.276	-0.862	-1.698	-1.593	2.06648e-07	0.000844027
Map1b_P14873_S1293s_1_1_1293_1293	P14873	P14873	Map1b	Microtubule-associated protein 1B	S1293s	SVsPGVTQAVVEEHCASPEEK	MOUSE	24.65	FALSE	0.434	1.556	2.17	1.422	0.565	1.806	2.597	1.721	5.58018e-07	0.000846061
Afap1_Q80YS6_S279sS284s_2_1_278_284	Q80YS6	Q80YS6|E9Q8X9	Afap1	Actin filament-associated protein 1	S279s S284s	KLSsERPSsDGEGGVENGVTTCNGK	MOUSE	8.37	TRUE	-0.221	-0.903	-2.127	-2.683	0.064	-0.393	-1.895	-2.792	6.15898e-07	0.000891372
Hivep2_Q3UHF7_S767s_1_0_760_767	Q3UHF7	Q3UHF7	Hivep2	Transcription factor HIVEP2	S767s	LDPARPQLPSRSPSLGsEDLPLAADPDK	MOUSE	15.73	TRUE	-0.227	-0.059	0.904	1.618	-0.137	0.219	0.987	1.748	6.73982e-07	0.000894149
Zfp638_E9QML5_S381s_1_1_381_381	E9QML5	Q61464|Q3TZK9|E9QKZ7|A0A0N4SV80|A0A0N4SVM8|E9QML5	Zfp638	Zinc finger protein 638	S381s	DYQSEADLPIRsPFGIVK	MOUSE	15.79	FALSE	0.176	-1.301	-1.257	-1.257	-0.008	-1.318	-1.393	-1.273	6.60766e-07	0.000894149
Shank2_D3Z5K8_S1753sS1755sS1757s_3_3_1753_1757	D3Z5K8	A0A1C7ZMY3|Q80Z38|A0A6I8MWY3|D3Z5K8	Shank2	SH3 and multiple ankyrin repeat domains protein 2	S1753s S1755s S1757s	sRsPsPSILQQPISNK	MOUSE	6.83	FALSE	0.515	2.062	1.655	1.35	0.549	2.361	2.004	1.676	8.3667e-07	0.000910247
Rab11fip5_A0A0N4SW73_T888tS890s_2_1_886_890	A0A0N4SW73	A0A0N4SW73	Rab11fip5	Rab11 family-interacting protein 5	T888t S890s	LFTPtNsQVEEEDKEEEENATGR	MOUSE	14.32	TRUE	-0.404	-1.564	-1.408	-1.104	-0.485	-1.648	-1.556	-1.054	8.57644e-07	0.000910247
Ehbp1_Q69ZW3_S221sS222s_2_2_221_222	Q69ZW3	Q69ZW3	Ehbp1	EH domain-binding protein 1	S221s S222s	ITEIVNQLNALssLDEDQDDCIK	MOUSE	22.49	FALSE	0.388	-0.855	-2.097	-1.974	0.354	-0.691	-1.681	-1.654	7.91747e-07	0.000910247
Zzef1_A0A140LJ04_S1535sS1538s_2_2_1535_1538	A0A140LJ04	Q5SSH7|E9Q5W5|A0A140LJ04	Zzef1	Zinc finger ZZ-type and EF-hand domain-containing protein 1	S1535s S1538s	LLsFRsMEETRPVPTVK	MOUSE	10.33	FALSE	-0.245	-1.667	-1.676	-1.432	-0.458	-1.661	-1.599	-1.377	7.30732e-07	0.000910247
Vac14_Q80WQ2_S519sT520t_2_1_519_522	Q80WQ2	Q80WQ2	Vac14	Protein VAC14 homolog	S519s T520t	GLEGSPstPTMNSYFYK	MOUSE	13.62	TRUE	0.181	0.415	1.121	1.647	0.082	0.309	1.03	1.52	7.44676e-07	0.000910247
Psma1_Q9R1P4_S247s_1_1_247_247	Q9R1P4	Q9R1P4|A0A1B0GS70	Psma1	Proteasome subunit alpha type-1	S247s	AQPsQAAEEPAEK	MOUSE	14.76	FALSE	-0.877	-2.196	-2.142	-1.779	-0.579	-1.952	-2.223	-1.893	8.46482e-07	0.000910247
Hivep2_Q3UHF7_S314s_1_1_314_314	Q3UHF7	Q3UHF7|A0A087WQF9	Hivep2	Transcription factor HIVEP2	S314s	GGYHGsLEESLGGPMK	MOUSE	16	FALSE	-0.588	-0.425	0.262	1.599	-0.467	-0.265	0.664	1.69	1.06475e-06	0.00105942
Mocs2_E9PVP5_S23s_1_1_23_23	E9PVP5	A0A0R4J206|E9PVP5|E9PUX1	Mocs2	Molybdopterin synthase catalytic subunit	S23s	LPSSRQsVEDNASEPSGK	MOUSE	15.11	FALSE	-0.26	-1.267	-1.863	-1.784	-0.325	-0.953	-1.935	-1.77	1.04675e-06	0.00105942
Map2_P20357_S346s_1_1_346_346	P20357	P20357|G3UZE9|A0A668KLC6|G3UZK9	Map2	Microtubule-associated protein 2	S346s	VSEGPRPFAPVFFQsDDK	MOUSE	13.53	FALSE	-0.479	-1.795	-1.911	-1.499	-0.615	-1.715	-1.653	-1.378	1.23028e-06	0.00108055
Atrx_Q61687_T1333tS1335sS1339s_3_3_1333_1339	Q61687	Q61687|A0A0G2JED2	Atrx	Transcriptional regulator ATRX	T1333t S1335s S1339s	HKLtLsDGEsGEEKPTKPK	MOUSE	9.86	FALSE	-1.925	-2.845	-2.691	-1.864	-1.715	-2.631	-2.648	-2.303	1.2896e-06	0.00108055
Dab2ip_Q3UHC7_S1108s_1_1_1108_1108	Q3UHC7	Q3UHC7	Dab2ip	Disabled homolog 2-interacting protein	S1108s	LMsVEEELK	MOUSE	12.26	FALSE	-0.318	-2.832	-3.032	-2.545	-0.377	-2.747	-2.43	-1.977	1.20255e-06	0.00108055
Wdr44_Q6NVE8_S264sT273t_2_2_264_273	Q6NVE8	Q6NVE8	Wdr44	WD repeat-containing protein 44	S264s T273t	KKsELEFEALKtPDLDVPK	MOUSE	11.77	FALSE	-0.695	-2.389	-2.235	-2.282	-0.278	-2.07	-2.084	-1.702	1.22706e-06	0.00108055
Tmcc1_F8WJ98_S419sS429s_2_2_419_429	F8WJ98	Q69ZZ6|A0A0N4SWB9|F8WJ98	Tmcc1	Transmembrane and coiled-coil domains protein 1 (Fragment)	S419s S429s	FGsADNIPNLKDsLEEGQVDDGGK	MOUSE	13.95	FALSE	-0.248	-1.057	-1.578	-1.276	-0.066	-0.861	-1.46	-1.215	1.27904e-06	0.00108055
Ccpg1_D3Z7R9_S480sT499t_2_0_480_499	D3Z7R9	Q640L3|D3Z7R9	Ccpg1	Cell cycle progression protein 1	S480s M495m T499t	sKETFLGTVKETFDAmKNStK	MOUSE	7.4	TRUE	-0.794	-1.594	-1.894	-0.672	-0.55	-1.699	-1.788	-0.663	1.22886e-06	0.00108055
Pclo_Q9QYX7_S345s_1_1_345_345	Q9QYX7	Q9QYX7	Pclo	Protein piccolo	S345s	sPAQQPGTAK	MOUSE	11.03	FALSE	0.927	1.631	1.896	1.831	1.363	1.88	2.152	1.937	1.39222e-06	0.00110821
Shank2_D3Z5K8_S1755sS1757s_2_1_1753_1759	D3Z5K8	Q80Z38|A0A6I8MWY3|D3Z5K8|A0A1C7ZMY3	Shank2	SH3 and multiple ankyrin repeat domains protein 2	S1755s S1757s	SRsPsPSILQQPISNKPFTTK	MOUSE	11.87	TRUE	0.384	1.444	1.237	1.193	0.3	1.351	1.28	1.246	1.36463e-06	0.00110821
Ate1_A0A1L1SQ41_S149s_1_1_149_149	A0A1L1SQ41	A0A1L1SQ41|Q4FCQ7|J3QNU1	Ate1	Arginyl-tRNA--protein transferase 1	S149s	GsIESEEK	MOUSE	10.26	FALSE	-0.548	-1.63	-1.606	-1.495	-0.517	-1.373	-1.415	-1.401	1.43512e-06	0.00111449
Bin1_O08539_S324s_1_0_321_324	O08539	O08539|Q6P1B9|A0A3Q4EBK4	Bin1	Myc box-dependent-interacting protein 1	S324s	VNHEPEPASGAsPGATIPK	MOUSE	21.52	TRUE	0.015	0.773	1.201	1.386	0.103	0.656	1.181	1.336	1.731e-06	0.00125262
Tmem266_Q8BZB3_S431s_1_0_430_431	Q8BZB3	Q8BZB3	Tmem266	Transmembrane protein 266	S431s	SsPLPLLLPPQQLVAEATVQDLMSSLSK	MOUSE	22.73	TRUE	0.508	1.39	1.379	0.938	0.597	1.461	1.473	1.138	1.72419e-06	0.00125262
Gprin3_Q8BWS5_S531s_1_1_531_531	Q8BWS5	Q8BWS5	Gprin3	G protein-regulated inducer of neurite outgrowth 3	S531s	KPAsPLIVK	MOUSE	9.46	FALSE	1.016	1.658	1.578	1.041	1.085	1.84	1.694	1.35	1.65905e-06	0.00125262
Pex5l_F8SLQ1_S78s_1_1_78_78	F8SLQ1	F8SLQ1	Pex5l	PEX5-related protein	S78s	EIPREEsAEEK	MOUSE	9.45	FALSE	-0.429	-1.552	-1.543	-1.674	-0.458	-1.423	-1.524	-1.379	1.78668e-06	0.00126417
Evl_A0A1Y7VJA2_S354s_1_1_354_354	A0A1Y7VJA2	P70429|F8WJB9|A0A1Y7VJA2|E9PVP4	Evl	Ena/VASP-like protein (Fragment)	S354s	VKPAGsVNDVGLDALDLDR	MOUSE	15.79	FALSE	-0.576	-1.496	-1.571	-1.438	-0.613	-1.371	-1.415	-1.244	1.8297e-06	0.00126647
Acin1_Q9JIX8_S863s_1_1_863_863	Q9JIX8	Q9JIX8|Q52KR6	Acin1	Apoptotic chromatin condensation inducer in the nucleus	S863s	KPsISITTESLK	MOUSE	9.39	FALSE	-1.892	-2.054	-2.218	-1.121	-1.862	-2.336	-2.194	-1.582	2.13052e-06	0.00141324
Ppfia2_B8QI34_T237tS239s_2_1_236_239	B8QI34	Q8BSS9|B8QI34|F7CYX4	Ppfia2	Liprin-alpha-2	T237t S239s	MVSSEGStEsEHLEGMEAGQK	MOUSE	17.91	TRUE	0.107	-0.551	-1.246	-1.671	0.256	-0.285	-1.018	-1.35	2.09683e-06	0.00141324
Herc1_E9PZP8_S3069s_1_1_3069_3069	E9PZP8	E9PZP8	Herc1	HECT and RLD domain-containing E3 ubiquitin protein ligase family member 1	S3069s	GQAPDLIGKQDsVYEEDWDMLDVDEDEK	MOUSE	27.37	FALSE	-0.212	-1.014	-1.322	-1.361	-0.087	-0.791	-1.191	-1.297	2.24181e-06	0.00141528
Afdn_E9Q9C3_S181s_1_1_181_181	E9Q9C3	Q9QZQ1|D3YUD2|E9Q852|D3Z7L2|E9Q9C3|E9PYX7	Afdn	Afadin	Q179q S181s	qAsDKEERPSQGDDSENSR	MOUSE	14.65	FALSE	-0.309	-1.197	-1.517	-1.341	-0.134	-1.131	-1.268	-1.333	2.26694e-06	0.00141528
Rap1gds1_E9Q912_S597s_1_1_597_597	E9Q912	E9Q912	Rap1gds1	Rap1 GTPase-GDP dissociation stimulator 1	S597s	SVAQQAsLTEQR	MOUSE	14.86	FALSE	-0.244	-0.751	-1.523	-1.526	0.069	-0.575	-1.287	-1.422	2.23415e-06	0.00141528
Map2_P20357_S309sS313s_2_2_309_313	P20357	P20357|G3UZE9|A0A668KLC6|G3UZK9	Map2	Microtubule-associated protein 2	S309s S313s	QFDsPMPsPFHGGSFTLPLDTMK	MOUSE	10.58	FALSE	-1.431	-2.467	-2.561	-2.462	-0.957	-1.794	-2.146	-2.089	2.46411e-06	0.00149651
Eps15l1_Q60902_S610s_1_1_610_610	Q60902	Q60902	Eps15l1	Epidermal growth factor receptor substrate 15-like 1	S610s	ALLFSNNsQELHPDPFQAEDPFK	MOUSE	20.47	FALSE	0.082	-1.033	-1.345	-1.145	-0.194	-1.09	-1.41	-1.189	2.49105e-06	0.00149651
Kif21b_Q9QXL1_S530sS534s_2_1_530_534	Q9QXL1	F8VQE2|E9Q0A4|Q9QXL1	Kif21b	Kinesin-like protein KIF21B	S530s S534s	NPYSLGASPAGPAFGGsPATsMEDASEVIRK	MOUSE	14.47	TRUE	-0.765	-1.5	-1.535	-1.338	-0.872	-1.431	-1.386	-1.207	2.65285e-06	0.00153576
Larp7_Q05CL8_S403s_1_1_403_403	Q05CL8	Q05CL8	Larp7	La-related protein 7	S403s	TIsQIK	MOUSE	7.46	FALSE	-1.317	-1.366	-1.656	-1.434	-1.488	-1.533	-1.534	-1.396	2.63533e-06	0.00153576
Ank2_S4R2F3_S2503sS2508s_2_2_2503_2508	S4R2F3	Q8C8R3|S4R2R5|S4R2F3	Ank2	Ankyrin-2	S2503s S2508s	LLRDPDGsAEDDsLEQTSLMESSGK	MOUSE	13.05	FALSE	0.218	-0.902	-1.337	-1.353	-0.075	-0.821	-1.442	-1.385	2.85573e-06	0.00158266
Tbc1d5_A0A286YDB3_S741s_1_0_740_741	A0A286YDB3	Q80XQ2|A0A286YDB3	Tbc1d5	TBC1 domain family member 5	S741s	QASsEMPGCTGGTTPDDFILVSK	MOUSE	14.7	TRUE	0.175	-0.96	-1.394	-1.294	-0.004	-0.794	-1.384	-1.18	2.93269e-06	0.00158266
Stau2_Q8CJ67_S440s_1_1_440_440	Q8CJ67	Q8CJ67|E2QRQ3|D3Z6D2	Stau2	Double-stranded RNA-binding protein Staufen homolog 2	S440s	VTSGTTLSYLsPK	MOUSE	14.86	FALSE	-0.614	-1.297	-1.184	-1.302	-0.442	-1.188	-1.148	-1.26	2.90211e-06	0.00158266
Tmem115_Q9WUH1_S306s_1_1_306_306	Q9WUH1	Q9WUH1	Tmem115	Transmembrane protein 115	S306s	RVEDQSAWPsMDDDEEEAGAK	MOUSE	21.21	FALSE	-0.493	-1.112	-1.467	-0.953	-0.561	-1.255	-1.522	-1.174	2.8967e-06	0.00158266
Acin1_Q9JIX8_T867t_1_1_867_867	Q9JIX8	Q9JIX8|Q52KR6|F6RJ39|B8JJ90|B8JJ91|B8JJ92	Acin1	Apoptotic chromatin condensation inducer in the nucleus	T867t	KPSISItTESLK	MOUSE	7.6	FALSE	-1.745	-1.922	-2.174	-1.052	-1.735	-2.365	-2.401	-1.541	3.11569e-06	0.00165339
Srgap2_Q91Z67_S500s_1_1_500_500	Q91Z67	Q91Z67|A0A087WSQ1|A0A087WS59|A0A087WNM1	Srgap2	SLIT-ROBO Rho GTPase-activating protein 2	S500s	KQDsSQAIPLVVESCIR	MOUSE	11.01	FALSE	-0.219	-0.924	-1.621	-1.786	0.175	-0.587	-1.454	-1.418	3.22794e-06	0.00168488
Ank2_S4R2F3_S2503s_1_1_2503_2503	S4R2F3	S4R2R5|S4R2F3	Ank2	Ankyrin-2	S2503s	DPDGsAEDDSLEQTSLMESSGK	MOUSE	19.35	FALSE	0.133	-1.024	-1.667	-1.262	-0.307	-1.279	-1.724	-1.526	3.71586e-06	0.00172923
Pclo_Q9QYX7_S3561s_1_1_3561_3561	Q9QYX7	Q9QYX7	Pclo	Protein piccolo	S3561s	VLYSPISPLsPGHALEPAFVPYEK	MOUSE	20.12	FALSE	-0.921	-1.403	-1.633	-1.506	-0.66	-1.127	-1.565	-1.487	3.60892e-06	0.00172923
Pclo_Q9QYX7_S617sS621s_2_2_617_621	Q9QYX7	Q9QYX7	Pclo	Protein piccolo	S617s S621s	sPVPsQQASPKK	MOUSE	5.18	FALSE	0.586	1.111	1.898	1.513	0.505	1.242	1.6	1.604	4.02511e-06	0.00172923
Map2_P20357_S365s_1_0_364_365	P20357	P20357|G3UZE9|A0A668KLC6|G3UZK9	Map2	Microtubule-associated protein 2	S365s	ESsKDEEPLK	MOUSE	9.2	TRUE	-0.222	-1.24	-2.406	-1.536	-0.096	-0.799	-2.015	-1.653	3.73587e-06	0.00172923
Sorbs2_A0A0R4J1T1_S89s_1_1_89_89	A0A0R4J1T1	B7ZWM6|B2RXQ9|A0A1B0GRC3|A0A0R4J1T1|F6ZWT0|F7BEU1	Sorbs2	Sorbin and SH3 domain-containing protein 2 (Fragment)	S89s	TQTYRPLsK	MOUSE	9.01	FALSE	-0.663	-1.967	-2.873	-1.856	-0.487	-1.741	-2.142	-1.733	4.04157e-06	0.00172923
Sphkap_E9PUC4_S774s_1_1_774_774	E9PUC4	Q6NSW3|A0A0R4J1Y6|E9PUC4	Sphkap	A-kinase anchor protein SPHKAP	S774s	NLVEDAsPK	MOUSE	12.98	FALSE	0.641	1.354	1.539	1.023	0.564	1.601	1.783	1.164	3.96723e-06	0.00172923
Epb41l3_A0A5F8MPE1_S927s_1_1_927_927	A0A5F8MPE1	Q9WV92|D0VYV6|A7YY80|A0A286YDY4|A0A3B2WD96|A0A286YD84|A0A5F8MPE1|A0A3B2WBE1|A0A5F8MPR1	Epb41l3	Band 4.1-like protein 3	S927s	VESTSVGSIsPGGAK	MOUSE	20.7	FALSE	0.154	0.951	1.306	1.209	0.27	0.807	1.402	1.282	3.73113e-06	0.00172923
Hivep2_Q3UHF7_S2415s_1_0_2413_2415	Q3UHF7	Q3UHF7	Hivep2	Transcription factor HIVEP2	S2415s	ELSLsTEEGNEPSPEK	MOUSE	13.52	TRUE	0.08	0.398	1.341	1.796	0.358	0.949	1.649	2.142	3.8113e-06	0.00172923
Dbn1_Q9QXS6_S307s_1_0_302_307	Q9QXS6	Q9QXS6	Dbn1	Drebrin	S307s	VASASGGsCDAPAPAPFNHRPGRPYCPFIK	MOUSE	16.42	TRUE	-0.251	-1.333	-1.255	-1.098	-0.316	-1.135	-1.235	-1.111	4.04356e-06	0.00172923
Cic_Q924A2_S2323s_1_0_2320_2324	Q924A2	Q924A2|E9QP01	Cic	Protein capicua homolog	S2323s	RSSCsSEPNTPK	MOUSE	7.08	TRUE	0.364	1.429	1.773	1.592	-0.117	1.275	1.68	1.306	3.45931e-06	0.00172923
Ppp1r9b_Q6R891_S94s_1_1_94_94	Q6R891	Q6R891	Ppp1r9b	Neurabin-2	S94s	GVRLsLPR	MOUSE	8.07	FALSE	-1.096	-1.264	-1.294	-0.032	-1.186	-1.474	-1.269	-0.312	4.12366e-06	0.00172923
Slc4a8_Q8JZR6_S277s_1_1_277_277	Q8JZR6	Q8JZR6	Slc4a8	Electroneutral sodium bicarbonate exchanger 1	S277s	NGVNCEHsPVDLSK	MOUSE	17.96	FALSE	-0.104	0.484	1.069	1.233	0.013	0.4	1.026	1.397	3.95333e-06	0.00172923
Prkar1b_P12849_S3s_1_0_3_5	P12849	P12849|D3Z7E4|D3Z406	Prkar1b	cAMP-dependent protein kinase type I-beta regulatory subunit	S3s	AsPSCFHSEDEDSLK	MOUSE	16.88	TRUE	-0.282	-0.875	-1.686	-1.229	-0.037	-0.58	-1.404	-1.112	4.12755e-06	0.00172923
Prkar1b_P12849_S83sT85t_2_1_77_85	P12849	P12849|D3Z406|D3Z4A5|D3YTM5|D3Z068	Prkar1b	cAMP-dependent protein kinase type I-beta regulatory subunit	S83s T85t	SNSQCDSHDEEIsPtPPNPVVK	MOUSE	15.93	TRUE	-0.023	-0.716	-1.441	-0.85	-0.161	-0.666	-1.368	-0.92	3.72842e-06	0.00172923
2700081O15Rik_A0A087WPN4_S27s_1_1_27_27	A0A087WPN4	Q4VA45|A0A087WPN4	2700081O15Rik	RIKEN cDNA 2700081O15 gene (Fragment)	S27s	KYsDHCEAR	MOUSE	7.8	FALSE	0.291	-0.99	-1.109	-0.931	0.006	-1.254	-1.445	-1.174	3.94748e-06	0.00172923
Wipf3_P0C7L0_S348s_1_1_348_348	P0C7L0	P0C7L0|D3Z5R4|E9Q2D0	Wipf3	WAS/WASL-interacting protein family member 3	S348s	SPsFQTQK	MOUSE	7.78	FALSE	-1.075	-1.227	-1.147	-1.005	-1.265	-1.305	-1.196	-1.111	4.24245e-06	0.00174688
Nkd2_Q8VE28_S184s_1_1_184_184	Q8VE28	Q8VE28	Nkd2	Protein naked cuticle homolog 2	S184s	LTVsPEPSSKK	MOUSE	7.6	FALSE	0.32	0.845	1.404	1.265	0.084	0.687	1.198	1.163	4.27942e-06	0.00174688
Ubxn2b_Q0KL01_S216s_1_1_216_216	Q0KL01	Q0KL01	Ubxn2b	UBX domain-containing protein 2B	S216s	AFsGEGQK	MOUSE	10.07	FALSE	-0.822	-2.741	-2.541	-2.183	-0.603	-2.909	-1.802	-2.011	4.62366e-06	0.00186351
Srcin1_A0A571BDG0_S1044s_1_1_1044_1044	A0A571BDG0	B1AQX7|A0A571BDG0|A0A571BDG6|A0A571BG20|A0A571BG39|B1AQX6	Srcin1	SRC kinase-signaling inhibitor 1	S1044s	KAEsEELEVQKPQVK	MOUSE	17.43	FALSE	-0.571	-1.579	-1.756	-1.462	-0.444	-1.375	-1.404	-1.551	4.74661e-06	0.00188084
Wbp11_Q923D5_S600s_1_1_600_600	Q923D5	Q923D5	Wbp11	WW domain-binding protein 11	S600s	GATAVPQRRsEDDSAVPVAK	MOUSE	11.92	FALSE	0.1	-1.238	-0.848	-0.911	0.301	-1.081	-0.893	-0.791	4.7848e-06	0.00188084
Ulk2_Q9QY01_S528s_1_1_528_528	Q9QY01	Q9QY01	Ulk2	Serine/threonine-protein kinase ULK2	S528s	LQsAPTLTDIYQNK	MOUSE	14.2	FALSE	-0.409	-1.399	-1.718	-1.271	-0.153	-1.006	-1.429	-1.098	5.29409e-06	0.00205566
Map2_P20357_S364s_1_0_360_364	P20357	A0A668KLC6|G3UZK9|P20357|G3UZE9	Map2	Microtubule-associated protein 2	S364s	VSLQDPSALATSKEsSKDEEPLK	MOUSE	13.81	TRUE	0.398	-0.496	-1.901	-2.001	0.313	0.073	-1.934	-1.562	5.6626e-06	0.0021464
Syn3_Q8JZP2_S418s_1_1_418_418	Q8JZP2	Q8JZP2	Syn3	Synapsin-3	S418s	sPGQGQLGPLLGQPQPRPPPQGGPR	MOUSE	23.17	FALSE	0.194	0.695	1.263	0.996	0.261	0.828	1.307	1.23	5.6283e-06	0.0021464
Zc3h7b_F8VPP8_S342s_1_1_342_342	F8VPP8	F8VPP8	Zc3h7b	Zinc finger CCCH type-containing 7B	S342s	LAASVLDALDsPGPTLDPLDLLPYSEAR	MOUSE	27.17	FALSE	-0.38	-0.889	-0.94	-1.327	-0.216	-0.762	-0.858	-1.321	5.86003e-06	0.00218118
Kiaa1841_Q68FF0_S124s_1_1_124_124	Q68FF0	Q68FF0|M0QWF3	Kiaa1841	Uncharacterized protein KIAA1841	S124s	NCsSESENCTAR	MOUSE	11.82	FALSE	-0.339	-0.708	-1.441	-0.976	-0.162	-0.631	-1.303	-1.025	5.89138e-06	0.00218118
Add2_Q9QYB8_S606s_1_1_606_606	Q9QYB8	Q9QYB8	Add2	Beta-adducin	S606s	STPASPVQsPSK	MOUSE	14.59	FALSE	0.193	0.108	0.538	2.039	-0.36	-0.266	0.068	1.756	6.08394e-06	0.00220128
Ralgds_Q3TWC1_T422t_1_1_422_422	Q3TWC1	Q03385|Q3TWC1|A2AK33|A0A571BEH0	Ralgds	Ral guanine nucleotide dissociation stimulator	T422t	DKKGKEHLAPtIR	MOUSE	4.22	FALSE	-0.009	-1.141	-0.988	-1.046	0.047	-0.942	-1.074	-0.991	6.05748e-06	0.00220128
Rps6kc1_E9QMX4_S599sS604s_2_1_599_604	E9QMX4	Q8BLK9|E9QMX4	Rps6kc1	Non-specific serine/threonine protein kinase	S599s S604s	IDsKDSTsELLGLDFGEK	MOUSE	10.01	TRUE	-0.538	-1.487	-2.195	-1.643	-0.833	-1.726	-2.108	-2.216	6.19492e-06	0.00221007
Mtus2_Q3UHD3_S1286s_1_1_1286_1286	Q3UHD3	Q3UHD3	Mtus2	Microtubule-associated tumor suppressor candidate 2 homolog	Q1284q S1286s	qLsEENANLQEYVEK	MOUSE	11.1	FALSE	-0.122	-0.858	-1.416	-1.189	-0.315	-0.893	-1.268	-1.193	6.24707e-06	0.00221007
Syn3_Q8JZP2_T401t_1_1_401_401	Q8JZP2	Q8JZP2	Syn3	Synapsin-3	T401t	MSQLLVPGAtVPSPLRPWGPQTK	MOUSE	19.12	FALSE	0.09	0.599	1.077	1.065	0.132	0.708	1.075	1.261	6.41152e-06	0.00224333
Prokr2_Q8K458_S359s_1_1_359_359	Q8K458	Q8K458|E0CY28	Prokr2	Prokineticin receptor 2	S359s	SsADLDLK	MOUSE	8.09	FALSE	-0.279	-1.084	-1.9	-1.72	-0.134	-1.208	-1.516	-1.413	6.60151e-06	0.00226825
Lsamp_Q8BLK3_S316s_1_1_316_316	Q8BLK3	Q8BLK3	Lsamp	Limbic system-associated membrane protein	S316s	TEPDsMQVIEFLHIDLK	MOUSE	5.46	FALSE	-0.266	-0.888	-1.437	-1.427	-0.247	-0.661	-1.181	-1.207	6.62522e-06	0.00226825
Farp1_F8VPU2_S516s_1_1_516_516	F8VPU2	F8VPU2	Farp1	FERM, ARHGEF and pleckstrin domain-containing protein 1	S516s	QASPLIsPLLNDQACPR	MOUSE	17.48	FALSE	-0.218	-1.142	-1.289	-1.332	-0.43	-1.391	-1.46	-1.232	6.74925e-06	0.00228613
Hid1_Q8R1F6_S589s_1_1_589_589	Q8R1F6	Q8R1F6	Hid1	Protein HID1	S589s	RTPEPLsR	MOUSE	8.41	FALSE	-0.024	-0.332	-1.155	-1.049	-0.084	-0.331	-1.124	-1.293	6.82923e-06	0.00228887
Iqsec2_E9QAD8_S1124s_1_0_1123_1128	E9QAD8	D3Z6V7|D3Z5I6|E9QAD8	Iqsec2	IQ motif and SEC7 domain-containing protein 2	S1124s	SsLEDTYGAGDGLK	MOUSE	17.73	TRUE	-0.187	-0.82	-1.908	-1.539	-0.466	-0.7	-1.632	-1.485	6.96936e-06	0.0023115
Rab11fip5_A0A0N4SW73_S1003s_1_1_1003_1003	A0A0N4SW73	A0A0N4SW73	Rab11fip5	Rab11 family-interacting protein 5	S1003s	VLGTsETEEGFETK	MOUSE	13.57	FALSE	-0.287	-1.326	-1.212	-1.12	-0.441	-1.18	-1.343	-1.08	7.09794e-06	0.00231786
Zfp101_Q8BP18_S214s_1_1_214_214	Q8BP18	Q8BP18	Zfp101	Zinc finger protein 101	S214s	LHsEVKPFVCK	MOUSE	4.53	FALSE	0.014	0.821	0.917	1.078	0.128	1.061	1.165	1.274	7.13411e-06	0.00231786
Syngap1_A0A0J9YUM2_S1097sS1101sS1104s_3_3_1097_1104	A0A0J9YUM2	F6SEU4|A0A2R8VHH2|A0A2R8VH83|A0A0A6YVS6|A0A0J9YUZ2|A0A338P799|A0A140T8K9|A0A0J9YVH8|A0A0J9YUM2|J3QQ18	Syngap1	Ras/Rap GTPase-activating protein SynGAP	S1097s S1101s S1104s	EGsIGGsGGsGGGGGGGLKPSITK	MOUSE	14.58	FALSE	0.172	0.682	1.807	0.999	0.447	1.187	2.19	1.49	7.4104e-06	0.00235957
Dgkb_Q6NS52_S121sS122s_2_1_117_128	Q6NS52	Q6NS52|Q3TSN3	Dgkb	Diacylglycerol kinase beta	S121s S122s	GAITPPRssPANTCSPEVIHLK	MOUSE	15.5	TRUE	0.239	0.998	1.192	0.646	0.217	0.923	1.223	0.76	7.4107e-06	0.00235957
Sipa1l1_Q8C0T5_T102t_1_1_102_102	Q8C0T5	Q8C0T5|Q4VBF8	Sipa1l1	Signal-induced proliferation-associated 1-like protein 1	T102t	ESSRSSQEIEtSSCLESLSSK	MOUSE	17.58	FALSE	-0.243	-1.556	-1.71	-1.121	-0.757	-1.929	-1.779	-1.328	7.54633e-06	0.00237896
Arhgef11_Q68FM7_S253sS256s_2_2_253_256	Q68FM7	D6RGQ8|E9Q0A3|Q68FM7	Arhgef11	Rho guanine nucleotide exchange factor (GEF) 11	S253s S256s	TCEGRLsVDsQEADSGLDSGTER	MOUSE	11.24	FALSE	-0.332	-1.113	-1.312	-1.203	-0.713	-1.396	-1.63	-1.459	7.85667e-06	0.00240535
Nudc_O35685_S136sS139s_2_2_136_139	O35685	O35685	Nudc	Nuclear migration protein nudC	S136s S139s	NGsLDsPGKQDAEDEEDEEDEK	MOUSE	9.59	FALSE	-0.117	-0.716	-1.67	-1.833	-0.022	-0.332	-1.327	-1.359	7.78007e-06	0.00240535
Gart_Q64737_S467s_1_0_461_467	Q64737	Q64737	Gart	Trifunctional purine biosynthetic protein adenosine-3	S467s	ATSRPGCsVDLGGFAGLFDLK	MOUSE	13.35	TRUE	-0.311	-0.826	-1.443	-1.679	0.167	-0.519	-1.386	-1.523	7.78142e-06	0.00240535
Dlgap4_B1AZP2_T582tS584s_2_1_580_584	B1AZP2	B7ZNS2|B1AZP2	Dlgap4	Disks large-associated protein 4	T582t S584s	PFISVTVQSStEsAQDTYLDSQDHK	MOUSE	20.73	TRUE	0.04	-0.57	-1.07	-1.01	-0.067	-0.57	-0.995	-0.954	8.12893e-06	0.00241893
Ralgapa1_A0A1W2P832_S864s_1_0_863_864	A0A1W2P832	A0A1W2P832|A0A2I3BRX9|A0A1W2P712|Q6GYP7	Ralgapa1	Ral GTPase-activating protein subunit alpha-1	S864s	EDTsPKLPPLNSETGGNSANVPDLMDEFIAER	MOUSE	24.36	TRUE	0.107	0.268	1.062	1.131	0.041	0.481	1.1	1.268	8.1062e-06	0.00241893
Ttc3_O88196_S1009s_1_1_1009_1009	O88196	O88196|D6RD03|A0A338P6W3|A0A0R4J1T2|D3Z485|D6RFU5|D6RHT6|D6RDD2|G5E8T2	Ttc3	E3 ubiquitin-protein ligase TTC3	S1009s	KQDsDEMPFGCIK	MOUSE	13.46	FALSE	-0.312	-0.75	-1.394	-1.016	-0.094	-0.579	-1.429	-0.847	7.98888e-06	0.00241893
Rab11fip5_A0A0N4SW73_S930s_1_1_930_930	A0A0N4SW73	A0A0N4SW73	Rab11fip5	Rab11 family-interacting protein 5	S930s	ALAIGPQEsKEEWVNPELEK	MOUSE	19.55	FALSE	-0.627	-1.325	-1.179	-1.056	-0.859	-1.409	-1.15	-1.044	8.3364e-06	0.0024577
Lztfl1_Q9JHQ5_S235s_1_1_235_235	Q9JHQ5	Q9JHQ5|A0A1L1SSX7|F6VG18|F6VTH5	Lztfl1	Leucine zipper transcription factor-like protein 1	S235s	sLEENLAAAK	MOUSE	10.56	FALSE	-0.517	-2.672	-1.992	-1.735	-0.323	-1.878	-1.82	-1.602	8.98128e-06	0.00262352
Kcnb1_Q03717_S607s_1_1_607_607	Q03717	Q03717	Kcnb1	Potassium voltage-gated channel subfamily B member 1	S607s	FSHsPLASLSGK	MOUSE	16.81	FALSE	0.992	1.454	1.179	0.731	0.838	1.464	1.367	0.85	9.19324e-06	0.00266102
Srcin1_A0A571BDG0_S1004s_1_1_1004_1004	A0A571BDG0	Q9QWI6|B1AQX7|A0A571BDG0|A0A571BDG6|A0A571BG20|A0A571BG39|B1AQX6|B1AQX9	Srcin1	SRC kinase-signaling inhibitor 1	S1004s	sPPPPPPR	MOUSE	10.26	FALSE	0.207	0.676	1.068	0.945	0.232	0.671	1.09	1.097	9.48751e-06	0.00267875
Syndig1_A2ANU3_S125s_1_1_125_125	A2ANU3	A2ANU3	Syndig1	Synapse differentiation-inducing gene protein 1	S125s	SPTKDsLEYPDGK	MOUSE	11.11	FALSE	-0.775	-1.244	-1.844	-1.884	-0.347	-1.011	-1.326	-1.639	9.41041e-06	0.00267875
Camk1_Q91YS8_S333s_1_0_323_333	Q91YS8	Q91YS8	Camk1	Calcium/calmodulin-dependent protein kinase type 1	S333s	LQLGTSQEGQGQTGsHGELLTPTAGGPAAGCCCR	MOUSE	19.18	TRUE	-0.538	-1.268	-1.364	-1.16	-0.634	-1.219	-1.13	-1.155	9.50686e-06	0.00267875
Hivep1_Q03172_S774s_1_1_774_774	Q03172	Q03172|F8VPM9	Hivep1	Zinc finger protein 40	S774s	RGsIDSPK	MOUSE	11.46	FALSE	-0.148	0.26	0.784	1	-0.166	0.437	0.936	1.049	9.77401e-06	0.00271315
Cog1_Q9Z160_S964s_1_0_959_964	Q9Z160	Q9Z160|Q810S7	Cog1	Conserved oligomeric Golgi complex subunit 1	S964s	QLASEEDDsPAPSLFK	MOUSE	16.6	TRUE	-0.728	-1.378	-1.217	-0.884	-0.578	-1.147	-1.206	-0.767	9.7994e-06	0.00271315
Rasa3_Q60790_S809s_1_1_809_809	Q60790	Q60790	Rasa3	Ras GTPase-activating protein 3	S809s	YGsQEHPIGDK	MOUSE	13.2	FALSE	-0.017	-0.925	-1.223	-0.952	-0.184	-0.9	-1.365	-0.821	9.89277e-06	0.00271539
Map1b_P14873_S1291sS1293sS1307s_3_3_1291_1307	P14873	P14873	Map1b	Microtubule-associated protein 1B	S1291s S1293s S1307s	VSAEGEARsVsPGVTQAVVEEHCAsPEEK	MOUSE	11.89	FALSE	0.207	0.601	1.456	1.246	-0.093	0.339	1.238	1.313	1.00584e-05	0.00273726
Exoc4_O35382_S32s_1_1_32_32	O35382	O35382|Q8C391|Q9CXE1	Exoc4	Exocyst complex component 4	S32s	TLsTSDDVEDRENEK	MOUSE	16.6	FALSE	-0.737	-1.393	-1.433	-1.013	-0.625	-1.645	-1.393	-1.24	1.0163e-05	0.00274229
Srgap3_F8VPQ4_S954s_1_1_954_954	F8VPQ4	Q812A2|F8VPQ4|E9QN14	Srgap3	SLIT-ROBO Rho GTPase-activating protein 3	S954s	sLEAEALAEDIEK	MOUSE	17.86	FALSE	-0.72	-1.271	-1.095	-0.958	-0.896	-1.377	-1.231	-0.876	1.05585e-05	0.00280151
Mycbp2_F6SMY7_S2977s_1_1_2977_2977	F6SMY7	Q7TPH6|F6SMY7|F7CZG3|E9PZJ2	Mycbp2	RCR-type E3 ubiquitin transferase (Fragment)	S2977s	sLEPAK	MOUSE	8.83	FALSE	-0.628	-1.739	-1.885	-1.381	-0.583	-1.591	-1.463	-1.57	1.04882e-05	0.00280151
Map1b_P14873_S1293sS1307s_2_2_1293_1307	P14873	P14873	Map1b	Microtubule-associated protein 1B	S1293s S1307s	SVsPGVTQAVVEEHCAsPEEK	MOUSE	18.79	FALSE	0.145	0.705	0.999	0.946	0.1	0.696	1.1	0.877	1.09252e-05	0.00283468
Farp1_F8VPU2_S512s_1_1_512_512	F8VPU2	F8VPU2	Farp1	FERM, ARHGEF and pleckstrin domain-containing protein 1	Q510q S512s	qAsPLISPLLNDQACPR	MOUSE	19.65	FALSE	-0.064	1.187	1.238	0.695	-0.001	1.004	1.366	0.936	1.09506e-05	0.00283468
Trafd1_Q3UDK1_S478s_1_1_478_478	Q3UDK1	Q3UDK1	Trafd1	TRAF-type zinc finger domain-containing protein 1	S478s	SDCQRsPPGVLK	MOUSE	12.16	FALSE	0.208	0.703	1.036	1.037	0.202	0.883	1.085	1.028	1.07926e-05	0.00283468
Map1b_P14873_S1260s_1_1_1260_1260	P14873	P14873	Map1b	Microtubule-associated protein 1B	S1260s	SPSLSPSPPsPIEK	MOUSE	14.95	FALSE	-0.391	-1.154	-3.247	-3.238	0.391	-0.254	-2.053	-2.371	1.11981e-05	0.00286683
Lamc1_P02468_T1441t_1_0_1439_1441	P02468	P02468	Lamc1	Laminin subunit gamma-1	T1441t	NATStKADAER	MOUSE	5.89	TRUE	-0.702	-0.178	1.542	2.072	-0.058	0.768	1.833	2.429	1.12548e-05	0.00286683
Epb41l3_A0A286YCT6_S59s_1_0_58_59	A0A286YCT6	A0A286YCT6	Epb41l3	Band 4.1-like protein 3 (Fragment)	S59s	VVFLQQGSsPFLESQTK	MOUSE	16.61	TRUE	0.281	0.967	1.05	0.763	0.422	1.009	1.193	0.793	1.15481e-05	0.00291818
Synrg_V9GX40_T573t_1_0_571_573	V9GX40	Q5SV85|V9GX40|V9GXD9	Synrg	Synergin gamma	T573t	SGSIDDSFtDFQEMPASSK	MOUSE	19.88	TRUE	-0.304	-1.246	-1.284	-1.183	-0.27	-0.954	-1.054	-1.05	1.17909e-05	0.00293299
Kpna3_O35344_S56sS60s_2_2_56_60	O35344	O35344	Kpna3	Importin subunit alpha-4	S56s S60s	NVPQEEsLEDsDVDADFK	MOUSE	14.84	FALSE	-0.074	-0.726	-0.946	-1.076	0.059	-0.511	-0.906	-1.027	1.1726e-05	0.00293299
Herc2_Q4U2R1_S1569s_1_0_1566_1569	Q4U2R1	Q4U2R1	Herc2	E3 ubiquitin-protein ligase HERC2	S1569s	KPESIDsEEK	MOUSE	6.93	TRUE	-0.266	-1.226	-1.868	-1.846	0.172	-0.551	-1.458	-1.544	1.20579e-05	0.00297355
Matk_A0A0R4J1N6_S216s_1_1_216_216	A0A0R4J1N6	P41242|D3Z4T5|A0A0R4J1N6	Matk	Tyrosine-protein kinase	S216s	sAEEELAK	MOUSE	11.42	FALSE	-0.263	-1.144	-1.263	-1.227	-0.033	-0.949	-0.916	-1.023	1.21407e-05	0.00297355
Farp1_F8VPU2_S1041s_1_1_1041_1041	F8VPU2	F8VPU2	Farp1	FERM, ARHGEF and pleckstrin domain-containing protein 1	S1041s	AHILsHK	MOUSE	11.25	FALSE	-1.178	-2.91	-2.938	-2.147	-0.206	-2.501	-2.741	-2.325	1.23153e-05	0.00297615
Pdcd4_Q61823_S94s_1_0_93_94	Q61823	Q61823|A0A494BA05	Pdcd4	Programmed cell death protein 4	S94s	SGVAVPTsPK	MOUSE	10.36	TRUE	0.002	0.09	0.791	1.304	-0.358	-0.048	0.656	1.374	1.23383e-05	0.00297615
Mprip_Q5SWZ5_S1046s_1_0_1045_1046	Q5SWZ5	Q5SWZ5	Mprip	Myosin phosphatase Rho-interacting protein	S1046s	MIALGSsLEETEIK	MOUSE	11.85	TRUE	-0.857	-2.678	-2.806	-2.596	0.046	-2.15	-1.927	-1.77	1.2434e-05	0.00297669
Tbc1d22b_Q80VE5_S132s_1_0_131_132	Q80VE5	Q80VE5|A0A3Q4EHL1	Tbc1d22b	TBC1 domain family, member 22B	S132s	SSsDAQLSR	MOUSE	11.79	TRUE	-0.408	-1.126	-1.208	-1.014	-0.217	-1.048	-0.958	-0.937	1.27969e-05	0.00304069
Chgb_P16014_S129s_1_1_129_129	P16014	P16014	Chgb	Secretogranin-1	S129s	WTEGGGHsREGVDDQESLRPSNQQASK	MOUSE	15.65	FALSE	0.172	0.061	0.503	1.153	0.006	0.06	0.446	1.104	1.29541e-05	0.00304135
Ppp1r12b_A6H644_S941s_1_1_941_941	A6H644	Q8BG95|A6H644|A0A571BGD8	Ppp1r12b	Protein phosphatase 1 regulatory subunit	S941s	KMsEMEEEMK	MOUSE	11.33	FALSE	-0.585	-1.623	-2.294	-2.161	-0.004	-0.92	-1.64	-1.796	1.29907e-05	0.00304135
Nhsl2_B1AXH1_S1067s_1_1_1067_1067	B1AXH1	B1AXH1	Nhsl2	NHS-like protein 2	S1067s	EAIsPGR	MOUSE	9.37	FALSE	0.239	1.674	1.597	1.042	0.07	1.146	1.473	0.73	1.31213e-05	0.00304838
Htatsf1_Q8BGC0_S242s_1_1_242_242	Q8BGC0	Q8BGC0	Htatsf1	HIV Tat-specific factor 1 homolog	S242s	KLsLQQK	MOUSE	8.45	FALSE	-1.862	-1.826	-1.872	-1.262	-1.495	-1.269	-1.429	-0.973	1.32122e-05	0.00304838
Eif4b_Q8BGD9_S497sS498sT500t_3_2_497_504	Q8BGD9	Q8BGD9	Eif4b	Eukaryotic translation initiation factor 4B	S497s S498s T500t	SQssDtEQPSPTSGGGK	MOUSE	8.7	TRUE	-0.21	-1.71	-2.333	-2.105	0.062	-0.804	-2.052	-1.962	1.33146e-05	0.00304992
Bsn_O88737_S2832s_1_1_2832_2832	O88737	O88737	Bsn	Protein bassoon	S2832s	AHVsPQK	MOUSE	12.62	FALSE	-0.028	1.228	1.771	1.782	0.744	1.928	2.421	2.302	1.3586e-05	0.00306793
Trappc12_Q8K2L8_S309sS314s_2_1_309_314	Q8K2L8	Q8C0C3|Q8K2L8	Trappc12	Trafficking protein particle complex subunit 12	S309s S314s	LSSLTAPVGEKsPDSTsPSYSTR	MOUSE	11.89	TRUE	0.126	0.425	0.934	1.003	-0.02	0.349	1	0.971	1.34964e-05	0.00306793
Pclo_Q9QYX7_T2186t_1_1_2186_2186	Q9QYX7	Q9QYX7	Pclo	Protein piccolo	T2186t	TItPESR	MOUSE	9.16	FALSE	0.653	1.233	1.219	1.219	0.311	1.106	1.072	1.099	1.38895e-05	0.00311255
Prex1_Q69ZK0_T432t_1_0_431_432	Q69ZK0	Q69ZK0|I7HPV9	Prex1	Phosphatidylinositol 3,4,5-trisphosphate-dependent Rac exchanger 1 protein	T432t	KLStVPK	MOUSE	6.05	TRUE	-1.155	-1.802	-1.47	-0.854	-0.921	-1.574	-1.604	-1.055	1.40768e-05	0.00311255
Arhgap44_Q5SSM3_S598s_1_1_598_598	Q5SSM3	Q5SSM3|F6T1Y2	Arhgap44	Rho GTPase-activating protein 44	S598s	ELsPGSGQK	MOUSE	12.62	FALSE	0.198	0.57	1.118	1.055	0.069	0.757	1.14	1.177	1.40766e-05	0.00311255
Hivep2_Q3UHF7_S565s_1_1_565_565	Q3UHF7	Q3UHF7	Hivep2	Transcription factor HIVEP2	S565s	GSHsFDER	MOUSE	12.27	FALSE	-0.649	-0.257	1.037	2.129	-0.129	0.694	1.594	2.394	1.45688e-05	0.00317409
Pdcd4_Q61823_S67s_1_1_67_67	Q61823	Q61823|A0A494BA05	Pdcd4	Programmed cell death protein 4	S67s	KNsSRDSGRGDSVSDNGSEAVR	MOUSE	13.63	FALSE	0.128	0.233	1.04	1.619	-0.333	-0.251	0.879	1.367	1.45374e-05	0.00317409
Hmgcr_Q01237_S384s_1_0_383_384	Q01237	Q01237|F2Z470	Hmgcr	3-hydroxy-3-methylglutaryl-coenzyme A reductase	S384s	LSsVEEDPGANQER	MOUSE	8.41	TRUE	-0.643	-1.165	-1.147	-1.103	-0.623	-1.506	-1.278	-1.259	1.46543e-05	0.00317409
Ica1l_A0A087WSM1_S316s_1_1_316_316	A0A087WSM1	Q3TY65|A0A087WSM1	Ica1l	Islet cell autoantigen 1-like protein	S316s	ALPRDsLEGDDFEK	MOUSE	13.44	FALSE	-0.162	-0.958	-1.486	-1.449	-0.035	-0.513	-1.204	-1.134	1.4772e-05	0.00317798
Syn3_Q8JZP2_S480s_1_1_480_480	Q8JZP2	Q8JZP2	Syn3	Synapsin-3	S480s	sPGSPQLSR	MOUSE	10.44	FALSE	0.201	0.665	0.989	1.121	0.031	0.723	1.147	1.119	1.49457e-05	0.00319378
Maf1_Q9D0U6_S70s_1_0_60_70	Q9D0U6	E0CYK4|Q9D0U6|E0CYF5	Maf1	Repressor of RNA polymerase III transcription MAF1 homolog	S70s	QFCQEGQPHVLEALSPPQTSGLSPsR	MOUSE	10.75	TRUE	0.228	1.504	1.368	1.18	0.441	1.414	1.076	1.239	1.51938e-05	0.00322513
Fus_P56959_S333s_1_1_333_333	P56959	P56959|Q8BQ46|Q8CFQ9|F6QCI0|G3UXT7	Fus	RNA-binding protein FUS	S333s	GEATVsFDDPPSAK	MOUSE	16.8	FALSE	-0.565	-0.942	-0.359	0.547	-0.252	-0.884	-0.38	0.662	1.54597e-05	0.00325985
Ap3b2_A0A571BES1_S752s_1_0_750_752	A0A571BES1	Q9JME5|A0A571BEW4|A0A571BES1	Ap3b2	AP-3 complex subunit beta	S752s	GGGSEsEQSEEEDEK	MOUSE	11.6	TRUE	-0.403	0.253	-0.155	1.834	-0.258	-0.195	-0.122	1.508	1.58297e-05	0.00331591
Hivep2_Q3UHF7_S2413sT2416t_2_1_2413_2416	Q3UHF7	Q3UHF7	Hivep2	Transcription factor HIVEP2	S2413s T2416t	ELsLStEEGNEPSPEK	MOUSE	8.99	TRUE	-0.392	-0.231	0.519	1.272	-0.032	0.116	0.684	1.318	1.61577e-05	0.00336248
Sorbs2_A0A0R4J1T1_S530sS531sT532t_3_2_528_532	A0A0R4J1T1	Z4YJR7|Q3UTJ2|B7ZWM6|A0A0R4J1T1|B9EKP8	Sorbs2	Sorbin and SH3 domain-containing protein 2 (Fragment)	S530s S531s T532t	GLLHGWSQsstEEVPRDVVPTR	MOUSE	8.58	TRUE	0.265	-1.112	-1.243	-1.036	0.255	-0.706	-1.085	-1.105	1.65061e-05	0.00341268
Syngap1_A0A0J9YUM2_S1101sS1104s_2_2_1101_1104	A0A0J9YUM2	F6SEU4|A0A2R8VHH2|A0A2R8VH83|A0A0A6YVS6|A0A0J9YUZ2|A0A338P799|A0A140T8K9|A0A0J9YVH8|A0A0J9YUM2|J3QQ18	Syngap1	Ras/Rap GTPase-activating protein SynGAP	S1101s S1104s	EGSIGGsGGsGGGGGGGLKPSITK	MOUSE	10.86	FALSE	0.027	0.639	1.139	1.016	0.255	0.697	1.512	1.116	1.67494e-05	0.00343578
Strn3_Q9ERG2_S214s_1_1_214_214	Q9ERG2	Q9ERG2	Strn3	Striatin-3	S214s	SLLGLSNSEPNGsVEAK	MOUSE	17.06	FALSE	-0.635	-1.418	-1.899	-1.656	-0.105	-0.955	-1.417	-1.27	1.68336e-05	0.00343578
Map2_P20357_S969s_1_1_969_969	P20357	P20357|A0A668KLC6	Map2	Microtubule-associated protein 2	S969s	LDTVLEKsEEHIDSK	MOUSE	17.66	FALSE	-0.46	-1.511	-1.963	-1.192	-0.159	-1.004	-1.561	-1.181	1.79024e-05	0.00345463
Rnps1_Q99M28_S10s_1_1_10_10	Q99M28	Q8CAV0|Q99M28	Rnps1	RNA-binding protein with serine-rich domain 1	S10s	sLLGVK	MOUSE	9.08	FALSE	-1.099	-1.499	-1.388	-1.049	-1.077	-1.125	-1.327	-1.024	1.78978e-05	0.00345463
Itsn1_E9Q0N0_S623s_1_1_623_623	E9Q0N0	Q9Z0R4|Q8BWY3|E9Q0N0|E9Q3I8	Itsn1	Intersectin-1	S623s	sLEAAR	MOUSE	10.38	FALSE	-0.451	-1.404	-1.588	-1.504	-0.491	-2.041	-1.686	-1.89	1.7513e-05	0.00345463
Hivep2_Q3UHF7_S1431sS1435s_2_1_1431_1435	Q3UHF7	Q3UHF7	Hivep2	Transcription factor HIVEP2	S1431s S1435s	MLsPASsLELFMETK	MOUSE	12.47	TRUE	-0.327	-0.087	0.677	1.72	0.077	0.281	1.135	1.665	1.78221e-05	0.00345463
Strn_O55106_S190s_1_1_190_190	O55106	O55106|F6Z700|F8WH41	Strn	Striatin	S190s	ALLGFsSDVTDREDDK	MOUSE	16.75	FALSE	-0.358	-1.007	-1.72	-1.268	-0.208	-0.691	-1.291	-1.236	1.70898e-05	0.00345463
Gab2_Q3ZB57_S532s_1_1_532_532	Q3ZB57	Q9Z1S8|Q3ZB59|Q3ZB57	Gab2	GRB2-associated-binding protein 2	S532s	NNTVIDELPFKsPVTK	MOUSE	16.37	FALSE	-1.075	-1.684	-1.652	-1.413	-0.71	-1.228	-1.277	-1.168	1.7416e-05	0.00345463
Pacsin2_A0A2R8W6S4_S170sS173s_2_1_159_173	A0A2R8W6S4	A0A2R8W6S4|A0A338P6P7	Pacsin2	Protein kinase C and casein kinase substrate in neurons protein 2 (Fragment)	S170s S173s	AVDGVTLTGINQTGDQSGQNKPGsVSsYEK	MOUSE	15.46	TRUE	-0.092	-1.033	-1.645	-1.094	0.111	-0.54	-1.302	-0.93	1.78212e-05	0.00345463
Myh9_Q8VDD5_T1939tS1943s_2_2_1939_1943	Q8VDD5	Q8VDD5	Myh9	Myosin-9	T1939t S1943s	GtGDCsDEEVDGK	MOUSE	10.78	FALSE	-0.941	-2.017	-1.935	-1.607	-0.474	-1.559	-1.307	-1.292	1.78058e-05	0.00345463
Brinp2_Q6DFY8_S761sT778t_2_1_761_778	Q6DFY8	Q6DFY8	Brinp2	BMP/retinoic acid-inducible neural-specific protein 2	S761s T778t	IQsSLRAFNSKLPNPVEYEtGK	MOUSE	4.96	TRUE	-0.084	-0.118	-0.008	0.94	-0.122	-0.004	-0.039	0.987	1.73236e-05	0.00345463
Rela_Q04207_T176tS180sT191t_3_3_176_191	Q04207	Q04207|A0A494BA44	Rela	Transcription factor p65	T176t S180s T191t	DPAGRPLLLtPVLsHPIFDNRAPNtAELKICR	MOUSE	5.38	FALSE	-0.227	-0.915	-0.867	-0.756	-0.193	-0.934	-0.795	-0.762	1.83694e-05	0.00352338
Magel2_Q9QZ04_S1267sS1270sS1280s_3_2_1267_1280	Q9QZ04	Q9QZ04	Magel2	MAGE-like protein 2	S1267s S1270s S1280s	DANAAAEEsHDsDDDAHDPTSsPHPH	MOUSE	12.82	TRUE	1.323	0.953	0.465	-0.085	1.381	1.051	0.671	-0.416	1.85242e-05	0.0035318
Cep170_Q6A065_S125sS126s_2_1_122_128	Q6A065	Q6A065|H7BX26	Cep170	Centrosomal protein of 170 kDa	S125s S126s	FTIQLQLSQKssESELPK	MOUSE	11.66	TRUE	-0.351	-1.363	-1.236	-0.883	-0.752	-1.491	-1.29	-1.17	1.95633e-05	0.00365223
Caskin1_Q6P9K8_S432s_1_0_428_432	Q6P9K8	Q6P9K8	Caskin1	Caskin-1	S432s	SVSESSPGDsPVKPPEGSSGAAR	MOUSE	18.27	TRUE	-0.261	-0.677	-0.846	-1.221	-0.093	-0.44	-0.686	-1.123	1.95483e-05	0.00365223
Sorbs2_A0A0R4J1T1_S528sS531s_2_1_528_531	A0A0R4J1T1	Z4YJR7|Q3UTJ2|B7ZWM6|A0A0R4J1T1|B9EKP8	Sorbs2	Sorbin and SH3 domain-containing protein 2 (Fragment)	S528s S531s	GLLHGWsQSsTEEVPR	MOUSE	15.81	TRUE	-0.711	-1.604	-2.004	-1.217	-0.559	-1.868	-1.584	-1.339	1.97976e-05	0.00365223
Marcks_P26645_S171s_1_1_171_171	P26645	P26645	Marcks	Myristoylated alanine-rich C-kinase substrate	S171s	KEsGEGAEAEGATAEGAK	MOUSE	19.38	FALSE	-0.395	-1.064	-1.76	-2.148	0.174	-0.285	-1.343	-1.836	1.96781e-05	0.00365223
Itsn1_E9Q0N0_S976sS984s_2_1_976_984	E9Q0N0	E9Q0N0|E9Q3I8|E9Q3I5|E9Q3I9|E9Q3I4|F6ZLP6	Itsn1	Intersectin-1	S976s S984s	STsIDTGPTEsPASLK	MOUSE	11.78	TRUE	-0.592	-1.122	-0.96	-0.8	-0.703	-1.366	-1.14	-0.801	1.98441e-05	0.00365223
Gtf2i_Q3UHU8_S103s_1_1_103_103	Q3UHU8	Q9ESZ8|Q3UHU8|G3UYD0	Gtf2i	General transcription factor II-I	S103s	STTQANRMsVDAVEIETLRK	MOUSE	12.11	FALSE	0.137	-0.936	-0.642	-0.662	-0.066	-1.103	-0.906	-0.864	1.95318e-05	0.00365223
Atrx_Q61687_S691s_1_1_691_691	Q61687	Q61687|F6RDB7	Atrx	Transcriptional regulator ATRX	S691s	RNsADCATDNPK	MOUSE	8.38	FALSE	0.434	-0.484	-1.133	-1.005	0.35	-0.234	-0.882	-1.162	2.0398e-05	0.00369019
Ryr2_E9Q401_S2693s_1_0_2692_2696	E9Q401	E9Q401|F6U7V1	Ryr2	Ryanodine receptor 2	S2693s	QSsMDSEGNFNPQPVDTSNITIPEK	MOUSE	19.3	TRUE	0.026	-0.253	-0.649	-0.978	0.071	-0.119	-0.581	-0.908	2.02602e-05	0.00369019
Senp7_Q8BUH8_S13s_1_1_13_13	Q8BUH8	Q8BUH8|Q9CX65|Q9CQN9|Q9CRF0|E9Q1L5|A0A0J9YUC9	Senp7	Sentrin-specific protease 7	S13s	ASsEIVTEGK	MOUSE	8.9	FALSE	0.238	-0.677	-0.866	-1.145	-0.188	-0.933	-1.007	-1.45	2.03924e-05	0.00369019
Sipa1l1_Q8C0T5_S93s_1_0_93_94	Q8C0T5	Q8C0T5|Q4VBF8	Sipa1l1	Signal-induced proliferation-associated 1-like protein 1	S93s	EsSRSSQEIETSSCLESLSSK	MOUSE	14.83	TRUE	-0.252	-1.341	-1.303	-1.121	-0.799	-1.557	-1.508	-1.416	2.08709e-05	0.0037544
Pde4b_Q8VBU5_S586s_1_1_586_586	Q8VBU5	Q6IQY6|B1PSD9|A6XDB0|A6XDB1|B2KF57|B1AWD1|B1AWD0|F6QFD1|Q3TTI9|E9PVU7|Q8VBU5|B2KF84|B1AWC8|B1AWC9	Pde4b	Phosphodiesterase	S586s	GMEIsPMCDK	MOUSE	12.5	FALSE	0.182	0.285	0.848	1.143	-0.046	0.307	0.914	1.279	2.13205e-05	0.00379279
Pex5l_F8SLQ1_S281s_1_1_281_281	F8SLQ1	Q8C437|F8SLP9|F8SLQ1|F8SLQ3|D3YYH0	Pex5l	PEX5-related protein	S281s	WGSALLsR	MOUSE	9.68	FALSE	-0.137	-0.512	-1.309	-1.079	-0.39	-0.912	-1.359	-1.273	2.13225e-05	0.00379279
Map2_P20357_S283sT288t_2_2_283_288	P20357	P20357|G3UZE9|A0A668KLC6|F7ALC8|G3UZK9	Map2	Microtubule-associated protein 2	S283s T288t	KDEWGLAAPIsPGPLtPMR	MOUSE	17.28	FALSE	-1.377	-2.159	-2.339	-2.364	-0.545	-1.43	-1.923	-1.99	2.14527e-05	0.00379474
Sphkap_E9PUC4_S1191s_1_1_1191_1191	E9PUC4	E9PUC4	Sphkap	A-kinase anchor protein SPHKAP	S1191s	DIAKEsK	MOUSE	11	FALSE	-0.491	-1.435	-2.557	-1.791	0.307	-0.61	-2.191	-1.554	2.16701e-05	0.00381202
Ank2_S4R2F3_S3878s_1_0_3878_3879	S4R2F3	Q8C8R3|S4R2R5|S4R2Q9|S4R2F3	Ank2	Ankyrin-2	S3878s	YVsSDGTEK	MOUSE	9.96	TRUE	-0.053	-0.925	-0.944	-0.958	-0.263	-1.069	-1.229	-0.94	2.20623e-05	0.00385968
Ank2_S4R2F3_S2975s_1_0_2967_2975	S4R2F3	S4R2F3|Q8C8R3|S4R2R5	Ank2	Ankyrin-2	S2975s	TVSGEESHCEsHDLETESEQK	MOUSE	18.19	TRUE	0.024	-0.503	-1.181	-1.075	0.02	-0.394	-0.88	-1.147	2.24585e-05	0.00390464
Erc2_Q3UHT7_S674s_1_1_674_674	Q3UHT7	Q6PH08|Q3UHT7	Erc2	ERC protein 2	S674s	sLEIAIEQK	MOUSE	11.1	FALSE	-0.424	-1.259	-1.269	-1.139	-0.22	-0.882	-1.261	-1.008	2.25668e-05	0.00390464
Prkar1a_Q9DBC7_S77s_1_1_77_77	Q9DBC7	Q9DBC7|A2AI69	Prkar1a	cAMP-dependent protein kinase type I-alpha regulatory subunit	S77s	TGIRTDsREDEISPPPPNPVVK	MOUSE	17.95	FALSE	-0.202	-0.866	-1.523	-1.188	0.178	-0.554	-1.122	-1.109	2.26872e-05	0.00390464
Dffa_O54786_S8s_1_1_8_8	O54786	O54786	Dffa	DNA fragmentation factor subunit alpha	S8s	GAsAPDPDDVRPLKPCLLR	MOUSE	10.25	FALSE	-0.256	-1.034	-0.964	-0.922	-0.189	-0.852	-1.016	-1.029	2.29142e-05	0.00392252
Phf14_Q9D4H9_S828s_1_1_828_828	Q9D4H9	Q9D4H9|G5E8S0|A0A0N4SWI1	Phf14	PHD finger protein 14	S828s	sFVPEEEK	MOUSE	10.16	FALSE	0.074	-1.164	-1.451	-1.307	-0.492	-1.425	-1.77	-1.979	2.30682e-05	0.00392776
Arid4a_F8VPQ2_S807s_1_1_807_807	F8VPQ2	F8VPQ2|E9Q9V1	Arid4a	AT-rich interactive domain-containing protein 4A	S807s	DLsLELIK	MOUSE	9.09	FALSE	-1.435	-1.852	-1.94	-1.243	-0.914	-1.766	-1.537	-1.292	2.32475e-05	0.00393724
Cacna1g_Q5SUF7_T2356tS2359s_2_1_2355_2361	Q5SUF7	Q5SUG3|Q5SUF7|Q5SUG2|Q5SUF8|Q5SUG1|Q5SUF6|Q5SUF9|Q5SUG0|E9PWL1|Q5SUF5|Q5SUG4	Cacna1g	Voltage-dependent T-type calcium channel subunit alpha	T2356t S2359s	DPSASSPLDStAAsPSPKK	MOUSE	10.19	TRUE	0.546	1.167	1.205	1.232	0.146	1.036	1.063	1.207	2.35892e-05	0.00397397
Map2_P20357_S313s_1_0_313_319	P20357	G3UZE9|A0A668KLC6|G3UZK9|P20357	Map2	Microtubule-associated protein 2	S313s	QFDSPMPsPFHGGSFTLPLDTMK	MOUSE	19.16	TRUE	-0.283	-1.225	-1.246	-1.509	-0.17	-0.788	-0.942	-1.208	2.38242e-05	0.00399244
Akap5_H3BIV5_T273t_1_0_272_277	H3BIV5	D3YVF0|H3BIV5	Akap5	A-kinase anchor protein 5	T273t	SVTSAAPPSPATtHQHSLEEPSNGIR	MOUSE	22.88	TRUE	-0.394	-0.838	-1.22	-0.927	-0.511	-1.133	-1.433	-1.315	2.40831e-05	0.00399377
Hivep3_A2A884_S489s_1_0_488_489	A2A884	A2A884	Hivep3	Transcription factor HIVEP3	S489s	RSsVESPK	MOUSE	6.46	TRUE	0.306	0.314	1.193	1.925	-0.241	0.323	1.292	1.605	2.40199e-05	0.00399377
Scaf11_E9PZM7_S1144s_1_1_1144_1144	E9PZM7	A0A2I3BQU5|A0A2I3BRQ7|E9PZM7	Scaf11	SR-related CTD-associated factor 11	S1144s	RKsEQELSFGTAADR	MOUSE	10.08	FALSE	-1.44	-1.897	-2.029	-1.306	-1.088	-1.853	-2.121	-1.801	2.44747e-05	0.0040377
Eif5_P59325_S388s_1_0_387_388	P59325	P59325|Q8BVV6	Eif5	Eukaryotic translation initiation factor 5	S388s	EAEEESsGGEEEDEDENIEVVYSK	MOUSE	16.31	TRUE	-0.272	-0.01	0.001	0.89	-0.41	-0.162	0.024	0.801	2.59709e-05	0.00426245
Phf14_Q9D4H9_S189sS201s_2_2_189_201	Q9D4H9	Q9D4H9|G5E8S0	Phf14	PHD finger protein 14	S189s S201s	NRPLLDFVsMEELNAMDDYDsEDDNDWRPTVVK	MOUSE	17.56	FALSE	-1.048	-1.116	-0.949	-0.398	-1.094	-1.157	-1.236	-0.647	2.61327e-05	0.00426699
Ppp1r12a_Q9DBR7_S618s_1_1_618_618	Q9DBR7	Q9DBR7	Ppp1r12a	Protein phosphatase 1 regulatory subunit 12A	S618s	LWAEDsTEK	MOUSE	11.2	FALSE	-0.348	-1.01	-1.031	-1.007	-0.233	-0.957	-0.822	-0.793	2.65169e-05	0.00430764
Jpt1_P97825_S88s_1_1_88_88	P97825	P97825	Jpt1	Jupiter microtubule associated homolog 1	S88s	SNSsEASSGDFLDLK	MOUSE	12.86	FALSE	-0.055	-0.462	-1.055	-0.999	-0.102	-0.421	-0.913	-0.81	2.73145e-05	0.00441469
Pde1a_Q61481_T4t_1_0_3_6	Q61481	Q61481	Pde1a	Calcium/calmodulin-dependent 3',5'-cyclic nucleotide phosphodiesterase 1A	T4t	GStDTDIEELENATYK	MOUSE	12.85	TRUE	-0.49	-1.346	-1.257	-0.967	-0.174	-0.999	-1.011	-0.723	2.7547e-05	0.00442978
Kif21a_E9Q0J5_S859s_1_0_855_859	E9Q0J5	Q9QXL2|E9Q0J5|F8WGN6	Kif21a	Kinesin-like protein KIF21A	S859s	KLSSSEsPAPDTGSSAASGEADTSRPGTQQK	MOUSE	22	TRUE	-0.513	-1.016	-1.112	-0.78	-0.343	-1.166	-1.055	-0.814	2.82149e-05	0.00451438
Prcc_Q9EQC8_T261tS267s_2_2_261_267	Q9EQC8	Q9EQC8	Prcc	Papillary Renal Cell carcinoma (Translocation-associated)	T261t S267s	QItQEDDDsDEEVAPENFFSLPDK	MOUSE	17.41	FALSE	-0.92	-0.98	-0.787	-0.746	-1.147	-1.148	-0.816	-0.891	2.88928e-05	0.00459974
Vps13c_Q8BX70_S2093s_1_1_2093_2093	Q8BX70	Q8BX70	Vps13c	Vacuolar protein sorting-associated protein 13C	S2093s	DDsVRPNMTLK	MOUSE	10.51	FALSE	-0.051	-0.235	-0.555	-0.998	0.01	-0.273	-0.656	-0.951	2.93849e-05	0.0046548
Smcr8_Q3UMB5_S466sS467sS470s_3_3_466_470	Q3UMB5	Q3UMB5	Smcr8	Guanine nucleotide exchange protein SMCR8	S466s S467s S470s	GSIssGEsIEVLGTEK	MOUSE	5.66	FALSE	0.269	0.49	0.981	1.123	0.053	0.2	0.86	1.056	2.95324e-05	0.00465501
Pdzd2_E9Q1M1_S1128s_1_1_1128_1128	E9Q1M1	E9Q1M1	Pdzd2	PDZ domain-containing 2	S1128s	IsPHYK	MOUSE	4.76	FALSE	0.439	0.986	1.587	1.262	-0.068	0.707	1.25	0.905	3.10486e-05	0.00470756
Zcchc8_Q9CYA6_S425sS426s_2_0_421_429	Q9CYA6	Q9CYA6	Zcchc8	Zinc finger CCHC domain-containing protein 8	S425s S426s	RSSSQssPNSPKK	MOUSE	5.04	TRUE	0.177	-0.915	-0.913	-1.357	0.691	-0.563	-0.76	-0.94	3.09438e-05	0.00470756
Plxna1_P70206_S1629sS1630sS1633s_3_3_1629_1633	P70206	P70206	Plxna1	Plexin-A1	S1629s S1630s S1633s	TAssPDsLRSR	MOUSE	4.72	FALSE	0.271	0.042	0.925	0.831	0.105	-0.15	0.77	0.781	3.01582e-05	0.00470756
Smcr8_Q3UMB5_S466sS467s_2_2_466_467	Q3UMB5	Q3UMB5	Smcr8	Guanine nucleotide exchange protein SMCR8	S466s S467s	GSIssGESIEVLGTEK	MOUSE	11.34	FALSE	0.36	0.59	1.124	1.507	-0.15	0.327	1.073	1.391	3.05072e-05	0.00470756
Ebag9_Q9D0V7_S86s_1_1_86_86	Q9D0V7	Q9D0V7|A0A2I3BPQ0	Ebag9	Receptor-binding cancer antigen expressed on SiSo cells	S86s	IEGGNGNVATQQNsLEQLEPDYFK	MOUSE	23.48	FALSE	-0.46	-1.123	-1.216	-1.014	-0.135	-0.926	-1.036	-1.035	3.05429e-05	0.00470756
Coro7_Q9D2V7_S912s_1_1_912_912	Q9D2V7	Q9D2V7	Coro7	Coronin-7	S912s	LGNREDPLPQDsFEGVDEDEWD	MOUSE	15.21	FALSE	-0.118	-0.94	-1.054	-0.911	-0.084	-0.791	-0.832	-0.693	3.09595e-05	0.00470756
Ankrd13d_Q6PD24_S552sT556t_2_2_552_556	Q6PD24	Q6PD24	Ankrd13d	Ankyrin repeat domain-containing protein 13D	S552s T556t	GPEsPQKtPPSPAPPSFEEQLR	MOUSE	13.27	FALSE	-0.484	-1.105	-1.643	-1.366	-0.916	-1.343	-1.486	-1.514	3.08078e-05	0.00470756
Lzts3_A2AHG0_T677t_1_0_674_677	A2AHG0	A2AHG0	Lzts3	Leucine zipper putative tumor suppressor 3	T677t	GAAGGSSTPtPQHGEEK	MOUSE	15.74	TRUE	-0.226	-1	-1.156	-1.226	-0.054	-0.888	-1.068	-0.819	3.06973e-05	0.00470756
Iqsec2_E9QAD8_S322s_1_1_322_322	E9QAD8	Q5DU25|A4GZ26|D3Z6V7|D3Z5I6|E9QAD8	Iqsec2	IQ motif and SEC7 domain-containing protein 2	S322s	ALSDsYELSTDLQDK	MOUSE	16.76	FALSE	-0.279	-1.183	-1.331	-0.258	-0.713	-1.687	-1.645	-0.761	3.15058e-05	0.00475424
Syngap1_A0A0J9YUM2_S165s_1_1_165_165	A0A0J9YUM2	A0A2R8VH83|A0A0A6YVS6|A0A140T8K9|A0A0J9YVH8|A0A0J9YUM2|J3QQ18	Syngap1	Ras/Rap GTPase-activating protein SynGAP	S165s	FRsADHDR	MOUSE	10.94	FALSE	-0.336	-0.952	-0.739	-0.066	-0.337	-0.94	-0.836	-0.203	3.17612e-05	0.00477018
Synpo_Q8CC35_S839s_1_0_838_839	Q8CC35	E9Q3E2|Q8CC35	Synpo	Synaptopodin	S839s	AASPAKPSsLDLVPNLPR	MOUSE	15.67	TRUE	-1.063	-1.42	-1.245	-0.605	-1.172	-1.442	-1.095	-0.95	3.24414e-05	0.00480434
Dido1_Q8C9B9_S1322s_1_1_1322_1322	Q8C9B9	Q8C9B9	Dido1	Death-inducer obliterator 1	S1322s	sFEPSGK	MOUSE	5.71	FALSE	-1.079	-1.246	-1.32	-0.653	-0.888	-1.45	-1.499	-0.928	3.2233e-05	0.00480434
Phax_Q9JJT9_S155s_1_1_155_155	Q9JJT9	Q9JJT9|G5E8V8|F6RPD4	Phax	Phosphorylated adapter RNA export protein	S155s	KEsQEYTK	MOUSE	6.21	FALSE	-1.183	-1.99	-2.038	-1.56	-0.623	-1.485	-1.387	-1.241	3.24361e-05	0.00480434
Pclo_Q9QYX7_S2495s_1_0_2492_2495	Q9QYX7	Q9QYX7	Pclo	Protein piccolo	S2495s	LPSPTSPLsPHSNK	MOUSE	17.5	TRUE	-0.664	-0.779	-0.78	-0.914	-0.752	-0.851	-0.822	-1.07	3.29178e-05	0.00484401
Cdc5l_Q6A068_S277s_1_0_273_277	Q6A068	Q6A068|A0A1W2P7S8	Cdc5l	Cell division cycle 5-like protein	S277s	KKESDLPsAILQTSGVSEFTK	MOUSE	16.74	TRUE	-2.192	-1.534	-2.694	-1.445	-2.186	-2.249	-2.397	-1.876	3.30135e-05	0.00484401
Rab11fip2_G3XA57_S382s_1_1_382_382	G3XA57	G3XA57|G3UW57	Rab11fip2	Rab11 family-interacting protein 2	S382s	LNNGGSDsPCDLK	MOUSE	12.73	FALSE	-0.632	-0.734	-0.744	-0.993	-0.658	-0.75	-0.747	-0.942	3.33626e-05	0.00487278
Tsc2_A0A2I3BPP1_S923s_1_1_923_923	A0A2I3BPP1	Q61037|Q3UHB2|Q7TT21|A0A2I3BPP1|A0A2I3BPR7|A0A2I3BRT5|A0A2I3BPE9	Tsc2	Tuberin	S923s	SNVLLsFDDTPEK	MOUSE	16	FALSE	-0.243	-0.727	-1.022	-0.978	-0.005	-0.485	-0.948	-0.908	3.42272e-05	0.00495627
Klc2_Q91YS4_S586s_1_1_586_586	Q91YS4	Q91YS4|D3YXZ3	Klc2	Kinesin light chain	S586s	sVEEPVQPGGTGLSDSR	MOUSE	14.66	FALSE	-0.079	-0.808	-0.877	-0.92	-0.316	-1.095	-0.944	-1.012	3.44013e-05	0.00495627
Dync1i1_O88485_S94s_1_1_94_94	O88485	O88485|D3Z0M6	Dync1i1	Cytoplasmic dynein 1 intermediate chain 1	S94s	SVSTPSDAGsQDSGDLGPLTR	MOUSE	14.56	FALSE	-0.278	-0.97	-0.944	-0.717	-0.238	-0.784	-0.905	-0.642	3.42741e-05	0.00495627
Rab11fip5_A0A0N4SW73_T886t_1_0_886_888	A0A0N4SW73	A0A0N4SW73	Rab11fip5	Rab11 family-interacting protein 5	T886t	LFtPTNSQVEEEDKEEEENATGR	MOUSE	21.39	TRUE	0.433	-0.912	-1.043	-0.709	0.029	-0.958	-1.09	-1.072	3.50172e-05	0.00501358
Wfs1_P56695_S32s_1_1_32_32	P56695	P56695|Q3UN10	Wfs1	Wolframin	S32s	LNATAsLEQDK	MOUSE	14.73	FALSE	-0.252	-1.011	-1.169	-0.386	-0.361	-1.454	-1.348	-0.374	3.5114e-05	0.00501358
Hivep2_Q3UHF7_S1081s_1_0_1077_1081	Q3UHF7	Q3UHF7	Hivep2	Transcription factor HIVEP2	S1081s	QASFSGsPEIAQGEAGVDPSVK	MOUSE	19.14	TRUE	-0.269	0.011	0.669	1.301	0.185	0.325	0.85	1.357	3.54934e-05	0.00504513
Eif4b_Q8BGD9_S422s_1_1_422_422	Q8BGD9	Q8BGD9	Eif4b	Eukaryotic translation initiation factor 4B	S422s	TGsESSQTGASATSGR	MOUSE	15	FALSE	-0.679	-0.711	-1.454	-1.121	-0.569	-0.373	-1.137	-0.956	3.58895e-05	0.0050563
Scrn1_Q9CZC8_S7sS9s_2_1_7_9	Q9CZC8	Q9CZC8|D3YXW0	Scrn1	Secernin-1	S7s S9s	MSGAPPsYsFVALPPR	MOUSE	5.31	TRUE	0.214	0.791	1.18	1.122	0.159	0.484	0.931	1.12	3.58483e-05	0.0050563
Fam193a_M0QWZ1_S579sS588s_2_1_576_588	M0QWZ1	Q8CGI1|M0QWZ1	Fam193a	Protein FAM193A	S579s S588s	LILTDNGSAPTFCsDDEDVAPLsAK	MOUSE	17.35	TRUE	-0.276	-1.029	-0.832	-0.908	-0.07	-1.04	-0.911	-0.746	3.66374e-05	0.00513891
Sipa1l1_Q8C0T5_S1384s_1_1_1384_1384	Q8C0T5	Q8C0T5|Q4VBF8	Sipa1l1	Signal-induced proliferation-associated 1-like protein 1	S1384s	SQGGSsPLSR	MOUSE	9.43	FALSE	0.339	0.707	0.958	0.741	0.451	0.742	1.001	0.901	3.68534e-05	0.00514654
Champ1_Q8K327_S434s_1_0_433_434	Q8K327	Q8K327	Champ1	Chromosome alignment-maintaining phosphoprotein 1	S434s	KPSSsPDLWK	MOUSE	7.33	TRUE	-1.595	-1.864	-1.933	-0.824	-1.462	-2.196	-2.436	-1.531	3.7365e-05	0.0051952
Abr_A0A571BG95_T400t_1_0_398_400	A0A571BG95	H3BL84|A0A571BG95|H3BKT3|E9PUE7|Q5SSL4	Abr	Active breakpoint cluster region-related protein	T400t	SQGGGDSVSPtPPEGLAPGVEAGK	MOUSE	22.54	TRUE	0.147	0.382	0.909	0.989	0.073	0.556	1.016	0.904	3.76782e-05	0.00521597
Ranbp2_Q9ERU9_S1528s_1_0_1526_1531	Q9ERU9	Q9ERU9	Ranbp2	E3 SUMO-protein ligase RanBP2	S1528s	CVACNNPVTPsLSTAPPSFK	MOUSE	19.91	TRUE	0.387	-0.98	-0.986	-0.962	0.84	-0.434	-0.689	-0.684	3.83158e-05	0.00525852
Rnft2_Q3UF64_S35sS39s_2_2_35_39	Q3UF64	Q3UF64|D3Z0I9|D3Z7E1	Rnft2	RING finger and transmembrane domain-containing protein 2	S35s S39s	SQALsPEAsVDEGGVFESLK	MOUSE	14.09	FALSE	-1.178	-0.884	-0.777	-0.264	-1.247	-1.299	-0.971	-0.369	3.82719e-05	0.00525852
Dlgap1_Q9D415_S519sS520sS521s_3_2_516_521	Q9D415	Q9D415|Q3UVU8|D3Z508|A0A3B2W7Z1|D3Z709|A0A3B2WD59|E9QAR5|D3Z6F4	Dlgap1	Disks large-associated protein 1	S519s S520s S521s	GCSQDDECVSLRsssPPR	MOUSE	10.35	TRUE	0.401	1.098	1.043	0.908	0.236	1.032	1.276	1.061	3.85001e-05	0.00526113
Cnnm4_Q69ZF7_S724s_1_1_724_724	Q69ZF7	Q69ZF7	Cnnm4	Metal transporter CNNM4	S724s	MDNsPQPTFDGCATCSENFMERPELPPVDETTTLLNER	MOUSE	23.52	FALSE	-0.046	0.307	0.79	0.908	0.125	0.286	0.869	0.857	3.87657e-05	0.00527478
Hivep2_Q3UHF7_S169s_1_1_169_169	Q3UHF7	Q3UHF7|A0A087WQF9	Hivep2	Transcription factor HIVEP2	S169s	sIEQAEDAHK	MOUSE	13.55	FALSE	-0.281	0.229	0.919	1.958	-0.797	-0.085	0.903	1.239	3.93615e-05	0.00533307
Syap1_Q9D5V6_S273s_1_1_273_273	Q9D5V6	Q9D5V6	Syap1	Synapse-associated protein 1	S273s	sQEDEEEISTSPGVSEFVSDAFDTCSLNQEDLRK	MOUSE	26.98	FALSE	-0.125	-1.315	-1.277	-1.307	-0.102	-0.818	-1.045	-1.066	3.97345e-05	0.00533817
Usp10_P52479_S208sS217s_2_2_208_217	P52479	P52479	Usp10	Ubiquitin carboxyl-terminal hydrolase 10	S208s S217s	TCDsPQNPVDFIsGPVPDSPFPR	MOUSE	13.27	FALSE	-0.734	-2.182	-1.98	-2.167	-0.043	-1.312	-1.462	-1.526	3.96381e-05	0.00533817
Tsc1_Q9EP53_S1074s_1_0_1070_1074	Q9EP53	Q9EP53	Tsc1	Hamartin	S1074s	WEPALGEPSSSIPTTVGsLPSSK	MOUSE	15.04	TRUE	0.237	-0.346	-0.712	-0.777	0.162	-0.24	-0.593	-0.803	4.02501e-05	0.00537537
Chrm3_Q9ERZ3_S291s_1_1_291_291	Q9ERZ3	Q9ERZ3	Chrm3	Muscarinic acetylcholine receptor M3	S291s	SCSsYELQQQGTK	MOUSE	15.38	FALSE	0.137	-0.509	-1.033	-1.031	-0.132	-0.939	-1.086	-1.177	4.0349e-05	0.00537537
Ank2_S4R2F3_S1733s_1_0_1732_1733	S4R2F3	S4R2F3|Q8C8R3|S4R2R5	Ank2	Ankyrin-2	S1733s	KGSsEESVDEDRGLVPEPLPTAK	MOUSE	9.54	TRUE	-0.408	-0.41	-0.302	0.492	-0.398	-0.548	-0.356	0.488	4.20302e-05	0.00537717
Bsn_O88737_T1489t_1_0_1481_1489	O88737	O88737	Bsn	Protein bassoon	T1489t	GYSYFTGSSPPLSPStPSESPTFSPGK	MOUSE	14.82	TRUE	-0.541	-0.829	-1.11	-1.191	-0.549	-0.778	-1.03	-0.904	4.24399e-05	0.00537717
Map1a_A2ARP8_T1938t_1_0_1932_1938	A2ARP8	Q9QYR6|A2ARP8	Map1a	Microtubule-associated protein 1A	T1938t	YSEEREStFLDEGPNEQEITPLQHTPR	MOUSE	13.34	TRUE	-0.542	-1.286	-1.244	-1.005	-0.358	-1.033	-1.411	-1.166	4.17112e-05	0.00537717
Nav1_Q8CH77_S380sS383s_2_2_380_383	Q8CH77	Q8CH77|A0A589P973	Nav1	Neuron navigator 1	S380s S383s	LELVEsLDsDEVDLK	MOUSE	11.33	FALSE	-0.517	-1.192	-1.409	-1.242	-0.778	-1.264	-1.128	-1.36	4.24638e-05	0.00537717
Dlgap4_B1AZP2_T714tT718t_2_1_714_718	B1AZP2	B1AZP2|B7ZNS2	Dlgap4	Disks large-associated protein 4	T714t T718t	RDtDSDtQDANDSSCK	MOUSE	8.3	TRUE	-0.198	-0.616	-1.208	-1.259	0.062	-0.174	-0.88	-1.051	4.08914e-05	0.00537717
Shank2_D3Z5K8_S446s_1_1_446_446	D3Z5K8	Q80Z38|D3Z5K8|A0A1L1SQP7	Shank2	SH3 and multiple ankyrin repeat domains protein 2	S446s	SLsPQLLQQTPSKPDGATK	MOUSE	19.52	FALSE	0.757	0.974	1.112	0.738	0.744	1.285	1.149	0.894	4.2558e-05	0.00537717
Grip1_D3YZL8_T982t_1_1_982_982	D3YZL8	Q925T6|D3YZL8|D3Z6R6|Q6GQT7|Q6X4T6|D3YWY4|H7BX90	Grip1	Glutamate receptor-interacting protein 1	T982t	EIMSPtPVELHK	MOUSE	13.83	FALSE	-0.356	-0.885	-0.752	-0.778	-0.293	-0.819	-0.689	-0.747	4.24314e-05	0.00537717
Chgb_P16014_S220s_1_1_220_220	P16014	P16014	Chgb	Secretogranin-1	S220s	ADAHsMELEEK	MOUSE	16.94	FALSE	-0.014	0.062	0.339	0.919	-0.195	-0.023	0.244	0.875	4.10395e-05	0.00537717
Sipa1l2_Q80TE4_S1403sS1406s_2_2_1403_1406	Q80TE4	Q80TE4|A0A1D5RLY9	Sipa1l2	Signal-induced proliferation-associated 1-like protein 2	S1403s S1406s	sEGsPPPEEPEVTECPR	MOUSE	18.03	FALSE	-0.019	-1.136	-1.397	-1.408	-0.377	-1.509	-1.634	-1.155	4.21068e-05	0.00537717
Prkag2_Q91WG5_S143s_1_0_142_143	Q91WG5	Q91WG5	Prkag2	5'-AMP-activated protein kinase subunit gamma-2	S143s	ESSPNSNPSTsPGGIR	MOUSE	12.17	TRUE	-0.386	-1.167	-1.004	-0.524	-0.771	-1.428	-1.314	-0.894	4.18289e-05	0.00537717
Fgd4_Q91ZT5_S71s_1_1_71_71	Q91ZT5	Q91ZT5	Fgd4	FYVE, RhoGEF and PH domain-containing protein 4	S71s	FLPQHsPQK	MOUSE	13.78	FALSE	0.184	0.693	1.052	1.116	0.293	1.082	1.535	1.356	4.20902e-05	0.00537717
Hcrtr2_P58308_S287s_1_1_287_287	P58308	P58308	Hcrtr2	Orexin receptor type 2	S287s	ARIsAVAAEIK	MOUSE	6.48	FALSE	-2.206	-1.976	-2.193	-1.529	-3.043	-3.006	-2.395	-2.321	4.06913e-05	0.00537717
Ica1_P97411_S302s_1_1_302_302	P97411	P97411|D3Z118	Ica1	Islet cell autoantigen 1	S302s	QLIsLEDEHK	MOUSE	11.74	FALSE	-0.679	-1.327	-1.207	-1.31	-0.561	-0.995	-1.192	-0.961	4.23357e-05	0.00537717
Farp1_F8VPU2_S512sS516s_2_2_512_516	F8VPU2	F8VPU2	Farp1	FERM, ARHGEF and pleckstrin domain-containing protein 1	Q510q S512s S516s	qAsPLIsPLLNDQACPR	MOUSE	16.07	FALSE	0.263	-0.259	-0.816	-1.072	0.198	-0.107	-0.97	-0.814	4.27617e-05	0.00538155
Serbp1_Q9CY58_S329s_1_1_329_329	Q9CY58	Q9CY58	Serbp1	Plasminogen activator inhibitor 1 RNA-binding protein	S329s	sEEAHAEDSVMDHHFR	MOUSE	13.69	FALSE	-0.382	-1.207	-1.522	-1.192	0.192	-0.903	-1.298	-1.175	4.31213e-05	0.00540544
Bsn_O88737_S1369s_1_1_1369_1369	O88737	O88737	Bsn	Protein bassoon	S1369s	LHsSPVSSTLTSK	MOUSE	10.57	FALSE	0.125	1.059	1.283	1.205	0.753	1.408	1.699	1.747	4.41605e-05	0.00540805
Bsn_O88737_S241sS245sS249s_3_3_241_249	O88737	O88737	Bsn	Protein bassoon	S241s S245s S249s	SQQQLHsPALsPAHsPAK	MOUSE	13.84	FALSE	0.265	0.757	1.104	0.72	0.037	0.64	0.957	0.746	4.40882e-05	0.00540805
Add1_Q9QYC0_S600s_1_1_600_600	Q9QYC0	Q9QYC0|A0A0J9YVI4|F8WGR0|E9Q1K3	Add1	Alpha-adducin	S600s	EKsPPDQSAVPNTPPSTPVK	MOUSE	17.17	FALSE	0.172	0.133	0.125	1.132	-0.042	0.032	0.254	1.118	4.40539e-05	0.00540805
Ppp1r7_Q3UM45_S12s_1_1_12_12	Q3UM45	Q3UM45	Ppp1r7	Protein phosphatase 1 regulatory subunit 7	S12s	GAGQQQsQEMMEVDR	MOUSE	16.17	FALSE	-0.376	-0.727	-1.172	-1.214	-0.345	-0.634	-0.928	-0.929	4.34901e-05	0.00540805
Ylpm1_D3YWX2_S712s_1_0_711_712	D3YWX2	Q9R0I7|D3YWX2|E9Q803|F6YTL8	Ylpm1	YLP motif-containing protein 1	S712s	VFSsEQGLGESSALSQSIIAAK	MOUSE	22.16	TRUE	-0.889	-1.497	-1.277	-0.96	-0.884	-1.138	-0.988	-0.874	4.41612e-05	0.00540805
Nol4l_Q3UH85_S539s_1_0_538_539	Q3UH85	Q6DIB4|Q3UH85|Q3TZG8	Nol4l	Nucleolar protein 4-like	S539s	LEIYQSsQEEPIALDK	MOUSE	13.99	TRUE	-0.529	-1.002	-1.162	-0.797	-0.437	-0.986	-0.954	-0.916	4.41514e-05	0.00540805
Mlf2_Q99KX1_S32s_1_1_32_32	Q99KX1	Q99KX1|A0A0N4SVM2|A0A0N4SVX3	Mlf2	Myeloid leukemia factor 2	S32s	MLsGGFGYSPFLSITDGNMPATR	MOUSE	20.47	FALSE	-1.21	-0.946	-1.057	-0.786	-1.256	-1.348	-1.194	-1.077	4.51273e-05	0.00550519
Dmxl2_Q8BPN8_S1399sS1403s_2_1_1399_1403	Q8BPN8	Q8BPN8	Dmxl2	DmX-like protein 2	S1399s S1403s	TIsVSGsTAK	MOUSE	4.55	TRUE	-0.396	-2.019	-1.46	-1.34	-0.218	-1.734	-2.055	-1.233	4.58041e-05	0.00556642
Oxr1_Q4KMM3_T203tS204s_2_1_201_204	Q4KMM3	A0A2R8VI09|Q4KMM3|E9Q0A7|A0A2R8W6N3	Oxr1	Oxidation resistance protein 1	T203t S204s	VVSStsEEEEAFTEK	MOUSE	12.96	TRUE	-0.063	-0.715	-1.048	-1.076	0.113	-0.845	-1.055	-0.784	4.62058e-05	0.00559389
Cwc25_Q9DBF7_S170s_1_1_170_170	Q9DBF7	Q9DBF7	Cwc25	Pre-mRNA-splicing factor CWC25 homolog	S170s	ELLQMsLEK	MOUSE	9.99	FALSE	-1.874	-1.755	-1.507	-1.313	-1.409	-1.188	-1.468	-0.923	4.66619e-05	0.00562771
Map2_P20357_S447s_1_1_447_447	P20357	P20357|G3UZE9|A0A668KLC6|G3UZK9	Map2	Microtubule-associated protein 2	S447s	STVsIEEAVAK	MOUSE	15.96	FALSE	-0.373	-1.404	-1.513	-1.28	-0.1	-0.867	-1.067	-1.037	4.70188e-05	0.00564935
Erc1_V9GWT6_S800sS801s_2_1_796_801	V9GWT6	V9GWT6	Erc1	ELKS/Rab6-interacting/CAST family member 1	S800s S801s	RREDSLSDssQQLQVEELLMAMEK	MOUSE	8.32	TRUE	0.143	-0.817	-1.076	-1.27	0.002	-0.519	-0.843	-1.039	4.72334e-05	0.0056538
Clip2_Q9Z0H8_S552s_1_1_552_552	Q9Z0H8	Q9Z0H8	Clip2	CAP-Gly domain-containing linker protein 2	S552s	LLsASK	MOUSE	8.13	FALSE	-0.281	-1.34	-1.368	-0.907	-0.118	-0.829	-1.255	-0.674	4.7663e-05	0.00566264
Scai_Q8C8N2_T34t_1_0_32_34	Q8C8N2	Q8C8N2	Scai	Protein SCAI	T34t	SRtEFTLK	MOUSE	5.14	TRUE	-0.779	-1.058	-0.91	-0.194	-0.851	-0.996	-1.128	-0.435	4.76625e-05	0.00566264
Map1a_A2ARP8_S2046s_1_0_2043_2046	A2ARP8	Q9QYR6|A2ARP8	Map1a	Microtubule-associated protein 1A	S2046s	NEPTTPsWLAEIPPWVPK	MOUSE	17.53	TRUE	-0.576	-1.087	-1.144	-1.117	-0.365	-0.752	-0.891	-0.998	4.92714e-05	0.00583198
Sorbs2_A0A0R4J1T1_S417sS428s_2_1_415_428	A0A0R4J1T1	Q3UTJ2|B7ZWM6|A0A0R4J1T1|B9EKP8|Z4YJR7|A0A0R4J1X5	Sorbs2	Sorbin and SH3 domain-containing protein 2 (Fragment)	S417s S428s	SRsCDDLLNDDCDsFPDPK	MOUSE	12.53	TRUE	-0.099	0.458	1.107	0.745	0.161	0.73	1.18	0.701	4.99437e-05	0.00588253
Pakap_F7AA26_S1012s_1_1_1012_1012	F7AA26	O54931|A2API8|F7AA26	Pakap	Paralemmin A kinase anchor protein (Fragment)	S1012s	QSTPsPR	MOUSE	5.41	FALSE	0.35	-0.399	-0.878	-0.839	0.253	-0.426	-0.655	-1.077	5.0068e-05	0.00588253
Pnn_Q3TUQ5_S96sS100s_2_2_96_100	Q3TUQ5	O35691|Q3TUQ5	Pnn	Pinin	S96s S100s	TRREsRQEsDPEDDDVK	MOUSE	6.24	FALSE	0.216	-0.57	-0.864	-0.941	0.265	-0.245	-0.614	-0.853	5.04556e-05	0.00588464
Hivep2_Q3UHF7_S2085s_1_1_2085_2085	Q3UHF7	Q3UHF7	Hivep2	Transcription factor HIVEP2	S2085s	EMsQGDASPR	MOUSE	10.51	FALSE	-0.063	0.258	1.063	1.752	-0.272	0.384	1.042	1.194	5.0362e-05	0.00588464
Map1b_P14873_S1257s_1_1_1257_1257	P14873	P14873	Map1b	Microtubule-associated protein 1B	S1257s	SPSLSPsPPSPIEK	MOUSE	12.76	FALSE	-0.178	-0.798	-1.105	-1.31	-0.045	-0.304	-0.949	-1.233	5.14551e-05	0.00589328
Map2_P20357_S1176s_1_1_1176_1176	P20357	P20357|A0A668KLC6	Map2	Microtubule-associated protein 2	S1176s	LsVEIPCPPPVSEADLSTDEK	MOUSE	16.58	FALSE	-0.324	-1.368	-1.536	-1.238	-0.458	-0.992	-1.22	-1.289	5.0877e-05	0.00589328
Arfgef3_Q3UGY8_S548s_1_1_548_548	Q3UGY8	Q3UGY8	Arfgef3	Brefeldin A-inhibited guanine nucleotide-exchange protein 3	S548s	GTMGKVsEPEAIDQPDVVQR	MOUSE	9.17	FALSE	0.168	0.603	1.003	0.69	-0.097	0.557	0.99	0.667	5.14005e-05	0.00589328
R3hdm2_Q80TM6_T363tS365s_2_1_361_365	Q80TM6	Q80TM6|E9Q9D6|F6Z9T5|Q148X5	R3hdm2	R3H domain-containing protein 2	T363t S365s	SLEPRPWSStDsDGSVR	MOUSE	7.91	TRUE	-0.263	-1.41	-2.186	-1.812	0.388	-1.04	-1.28	-1.571	5.09186e-05	0.00589328
Asb3_A0A0N4SV07_S74s_1_1_74_74	A0A0N4SV07	A0A0N4SV07	Asb3	Ankyrin repeat and SOCS box protein 3	S74s	GRsVDVADNR	MOUSE	7.65	FALSE	-0.245	-0.894	-0.864	-0.913	-0.294	-0.858	-0.732	-0.752	5.13847e-05	0.00589328
Usp47_Q8BY87_S849s_1_1_849_849	Q8BY87	Q8BY87|A0A1L1SV73	Usp47	Ubiquitin carboxyl-terminal hydrolase 47	S849s	AGGDsGNVDDDCER	MOUSE	16.16	FALSE	-0.439	-1.173	-0.922	-0.796	-0.847	-1.366	-1.238	-1.125	5.16912e-05	0.00589909
Syn2_Q64332_T422tS426s_2_2_422_426	Q64332	Q64332	Syn2	Synapsin-2	T422t S426s	tPALsPQRPLTTQQPQSGTLK	MOUSE	13.67	FALSE	0.186	0.15	0.765	1.262	-0.005	-0.126	0.486	1.461	5.23717e-05	0.00592904
Ythdc1_E9Q5K9_T55t_1_0_54_55	E9Q5K9	E9Q5K9|D6RG95	Ythdc1	YTH domain-containing protein 1	T55t	MEStDTK	MOUSE	6.54	TRUE	-0.254	-1.44	-1.579	-1.166	-0.267	-1.307	-1.662	-1.82	5.25123e-05	0.00592904
Lrch2_F6VQ19_S540s_1_1_540_540	F6VQ19	Q3UMG5|A2AMP0|F6VQ19	Lrch2	Leucine-rich repeat and calponin homology domain-containing protein 2 (Fragment)	S540s	SVPADEGNSPLsPLAWQPLENQK	MOUSE	16.89	FALSE	-0.662	-1.188	-1.07	-1.086	-0.387	-1.064	-0.777	-1.124	5.24396e-05	0.00592904
Pclo_Q9QYX7_S289s_1_1_289_289	Q9QYX7	Q9QYX7	Pclo	Protein piccolo	S289s	sPAQPAGTGK	MOUSE	13.03	FALSE	0.503	0.836	0.888	0.758	0.583	1.064	0.901	0.88	5.5518e-05	0.00598987
Sorbs2_B9EKP8_S130sS143s_2_1_130_143	B9EKP8	B2RXQ9|A0A1B0GRC3|B9EKP8|D3Z080|A0A0R4J1W0|A0A0R4J1X5|D3Z203	Sorbs2	Sorbin and SH3 domain-containing protein 2	S130s S143s	sLDSAETYSQHAQsLDGTMGSSIPLYR	MOUSE	15.3	TRUE	-0.507	-0.968	-0.93	-0.774	-0.746	-1.334	-1.149	-0.896	5.46431e-05	0.00598987
Mast1_Q9R1L5_S1501sT1512t_2_1_1497_1512	Q9R1L5	Q9R1L5	Mast1	Microtubule-associated serine/threonine-protein kinase 1	S1501s T1512t	SKPAsPKLSPDPQTPtLVPTK	MOUSE	12.3	TRUE	0.394	1.071	1.058	1.142	0.022	0.822	1.115	1.083	5.37788e-05	0.00598987
Sphkap_E9PUC4_S50s_1_1_50_50	E9PUC4	Q6NSW3|E9PUC4	Sphkap	A-kinase anchor protein SPHKAP	S50s	SNsLLESTDYWLQNQR	MOUSE	22.42	FALSE	-0.28	-0.785	-1.175	-1.397	0.211	-0.415	-0.894	-1.024	5.54184e-05	0.00598987
Add1_Q9QYC0_S605s_1_1_605_605	Q9QYC0	Q9QYC0	Add1	Alpha-adducin	S605s	EKSPPDQsAVPNTPPSTPVK	MOUSE	17.5	FALSE	-0.026	-0.153	0.152	0.939	-0.144	0.041	0.113	0.996	5.63679e-05	0.00598987
Uhrf1bp1l_A2RSJ4_S1020s_1_0_1016_1020	A2RSJ4	A2RSJ4	Uhrf1bp1l	UHRF1-binding protein 1-like	S1020s	DGSTRLsLDDDGNHNPPSNPVTGK	MOUSE	17.71	TRUE	-0.272	-1.178	-1.545	-1.13	-0.126	-0.902	-1.018	-1.068	5.38128e-05	0.00598987
Samd14_Q8K070_S108sS117s_2_2_108_117	Q8K070	Q8K070|B7ZC59	Samd14	Sterile alpha motif domain-containing protein 14	S108s S117s	sLDEDEPPPsPLAR	MOUSE	10.03	FALSE	-0.277	-0.72	-0.868	-0.93	-0.241	-0.701	-0.913	-0.744	5.57266e-05	0.00598987
Erc2_Q3UHT7_S329s_1_1_329_329	Q3UHT7	Q6PH08|Q3UHT7	Erc2	ERC protein 2	S329s	sLEDDNER	MOUSE	6.75	FALSE	0.087	-1.213	-0.657	-0.627	-0.261	-1.177	-0.785	-0.871	5.59553e-05	0.00598987
Shroom2_A7TU71_S1095s_1_1_1095_1095	A7TU71	A2ALU4|A7TU71	Shroom2	Protein Shroom2	S1095s	IVHSEsQPEK	MOUSE	14.2	FALSE	-1.172	-1.351	-1.233	-1.003	-0.795	-1.083	-0.879	-0.839	5.4257e-05	0.00598987
Dbn1_Q9QXS6_S385s_1_1_385_385	Q9QXS6	Q9QXS6|A0A0R4J1E3	Dbn1	Drebrin	S385s	MAPTPIPTRsPSDSSTASTPIAEQIER	MOUSE	18.62	FALSE	0.157	0.016	0.762	0.912	0.038	0.216	0.841	0.92	5.65689e-05	0.00598987
Mtss2_Q6P9S0_S587s_1_1_587_587	Q6P9S0	Q6P9S0|D3YWC9	Mtss2	Protein MTSS 2	S587s	AGSEECVFYTDEVAsPLAPDLAK	MOUSE	19.27	FALSE	-0.516	-1.55	-1.363	-1.383	-0.182	-0.981	-0.986	-1.033	5.35168e-05	0.00598987
Tacc1_F8VQ95_S378s_1_1_378_378	F8VQ95	Q6Y685|F8VQ95	Tacc1	Transforming acidic coiled-coil-containing protein 1	S378s	DGVSKPVGVEQPSDPTVQDALLDQMsPK	MOUSE	21.06	FALSE	-0.326	-1.031	-1.132	-1.022	-0.189	-0.732	-0.859	-1.034	5.49901e-05	0.00598987
Mgrn1_Q9D074_S437s_1_1_437_437	Q9D074	Q9D074	Mgrn1	E3 ubiquitin-protein ligase MGRN1	S437s	SPsFPIHEEDEEK	MOUSE	16.02	FALSE	-0.562	-0.975	-1.134	-0.436	-0.819	-1.45	-1.362	-0.717	5.37829e-05	0.00598987
Cadps_J3QJW3_S89sS91s_2_1_89_93	J3QJW3	Q80TJ1|A0A286YDH6|K4DI76|J3QJW3	Cadps	Calcium-dependent secretion activator 1	S89s S91s	AGGGRPSsPsPSVVSEK	MOUSE	10.95	TRUE	0.163	0.675	0.764	0.803	0.244	0.928	1.005	1.018	5.62076e-05	0.00598987
[truncated: 31,544 more rows]

## Sheet: S1C. BIC_Proteome
								log2 TMT ratios to control
[truncated: 9,513 more rows]

[truncated: 2 more sheets: S1D. BIC_Phosphoproteome, S1E. Bidirectional phosphosites]
