# Supplementary material for: A bidirectional switch in the Shank3 phosphorylation state biases synapses toward up- or downscaling
Source: eLife. 2022 Apr 26;11:e74277. doi: 10.7554/eLife.74277 (PMC9084893; doi:10.7554/eLife.74277)
Supplement: Figure 1—source data 2. [file elife-74277-fig1-data2.xlsx]

## Sheet: Legend
Table S2. Pathway enrichment analysis results
Table S2A. BIC Cluster 1	Pathway enrichment results for phosphosites that belong to BIC cluster 1
Table S2B. BIC Cluster 2	Pathway enrichment results for phosphosites that belong to BIC cluster 2
Table S2C. BIC Cluster 3	Pathway enrichment results for phosphosites that belong to BIC cluster 3
Table S2D. BIC Cluster 4	Pathway enrichment results for phosphosites that belong to BIC cluster 4
Table S2E. TTX Cluster 1	Pathway enrichment results for phosphosites that belong to TTX cluster 1
Table S2F. TTX Cluster 2	Pathway enrichment results for phosphosites that belong to TTX cluster 2
Table S2G. TTX Cluster 3	Pathway enrichment results for phosphosites that belong to TTX cluster 3
Table S2H. Pathway Clusters	Pathways that are contained within network clusters as generated in Cytoscape
Table S2A-S2G Legend
GO.ID	Pathway identifier
Description	Description of the pathway
FDR	FDR adjusted p-value for pathway enrichment (hypergeometric test)
Genes	Comma-separated list of proteins that belong to the pathway, shown as gene symbols
Table S2H Legend
Cluster	Name for cluster containing enriched pathways
Enriched Pathways	Pathways contained within the cluster

## Sheet: Table S2A. BIC Cluster 1
GO.ID	Description	FDR	Genes
GO:0098984	neuron to neuron synapse	4.19741e-16	Map2,Unc13b,Ank2,Mapk8ip2,Plppr4,Dlgap1,Camk2b,Dlgap3,Shank2,Psd3,Itpr1,Prkar1b,Slc8a3,Map1a,Grip2,Cnksr2,Akap5,Shisa9,Bmpr2,Add3,Pcbp2,Syn2,Prkcg,Psd,Syn3,Prrt2,Dbn1,Mapk1,Kcnd3,Map1b,Pclo,Sorbs2,Bsn,Syngap1,Grin2a,Dnajc6,Map4,Palm,Epb41l3,Rtn4,Ptk2b,Rgs14,Sipa1l1,Cacna1c,Lzts1,Nos1,Shisa7,Gng3,Dmtn,Pacsin1,Shisa6,Kcnd2,Cdk5r1,Add2,Syn1,Syt7,Tsc2,Shank3,Syt11,Dtnb,Crtc1,Ppp1r9a,Adgrl1,Mpp2,Capzb…
GO:0030054	cell junction	1.56139e-15	Map2,Unc13b,Peak1,Ank2,Mapk8ip2,Akap6,Plppr4,Dlgap1,Camk2b,Farp1,Dlgap3,Arhgap39,Obscn,Shank2,Kcnb1,Psd3,Brsk1,Itpr1,Prkar1a,Prkar1b,Sh3kbp1,Ptpra,Spart,Slc8a3,Ank1,Hcn2,Rai14,Myo1e,Map1a,Grip2,Kif1a,Cnksr2,Akap5,Akap12,Shisa9,Egfr,Bmpr2,Add3,Pcbp2,Eif4g1,Jcad,Syn2,Pikfyve,Prkcg,Slc12a4,Psd,Syn3,Ssh2,Prrt2,Pcdh1,Dbn1,Mapk1,Tiam2,Pcdh8,Kiaa1109,Plcg1,Kcnd3,Maco1,Map1b,Pclo,Sorbs2,Synj1,Bsn,Coro1a,…
GO:0099572	postsynaptic specialization	3.69401e-15	Map2,Ank2,Mapk8ip2,Plppr4,Dlgap1,Camk2b,Dlgap3,Shank2,Psd3,Itpr1,Slc8a3,Map1a,Grip2,Cnksr2,Akap5,Shisa9,Bmpr2,Add3,Pcbp2,Syn2,Prkcg,Psd,Syn3,Prrt2,Dbn1,Mapk1,Kcnd3,Map1b,Pclo,Sorbs2,Bsn,Syngap1,Grin2a,Dnajc6,Map4,Palm,Epb41l3,Rtn4,Ptk2b,Rgs14,Gabra3,Sipa1l1,Cacna1c,Lzts1,Dlgap4,Nos1,Shisa7,Gng3,Dmtn,Pacsin1,Shisa6,Kcnd2,Cdk5r1,Add2,Syn1,Chrna4,Tsc2,Shank3,Syt11,Dtnb,Crtc1,Ppp1r9a,Adgrl1,Mpp2,Capz…
GO:0045202	synapse	3.89107e-15	Map2,Unc13b,Ank2,Mapk8ip2,Plppr4,Dlgap1,Camk2b,Farp1,Dlgap3,Arhgap39,Shank2,Kcnb1,Psd3,Brsk1,Itpr1,Prkar1a,Prkar1b,Sh3kbp1,Ptpra,Spart,Slc8a3,Ank1,Hcn2,Map1a,Grip2,Kif1a,Cnksr2,Akap5,Akap12,Shisa9,Egfr,Bmpr2,Add3,Pcbp2,Eif4g1,Syn2,Prkcg,Slc12a4,Psd,Syn3,Prrt2,Dbn1,Mapk1,Tiam2,Pcdh8,Kiaa1109,Plcg1,Kcnd3,Maco1,Map1b,Pclo,Sorbs2,Synj1,Bsn,Coro1a,Syngap1,Grin2a,Dnajc6,Hip1,Map4,Palm,Atp2b4,Epb41l3,Tp…
GO:0014069	postsynaptic density	5.34892e-15	Map2,Ank2,Mapk8ip2,Plppr4,Dlgap1,Camk2b,Dlgap3,Shank2,Psd3,Itpr1,Slc8a3,Map1a,Grip2,Cnksr2,Akap5,Shisa9,Bmpr2,Add3,Pcbp2,Syn2,Prkcg,Psd,Syn3,Prrt2,Dbn1,Mapk1,Kcnd3,Map1b,Pclo,Sorbs2,Bsn,Syngap1,Grin2a,Dnajc6,Map4,Palm,Epb41l3,Rtn4,Ptk2b,Rgs14,Sipa1l1,Cacna1c,Lzts1,Nos1,Shisa7,Gng3,Dmtn,Pacsin1,Shisa6,Kcnd2,Cdk5r1,Add2,Syn1,Tsc2,Shank3,Syt11,Dtnb,Crtc1,Ppp1r9a,Adgrl1,Mpp2,Capzb,Iqsec3,Gphn,Add1,Tn…
GO:0032279	asymmetric synapse	1.76774e-14	Map2,Ank2,Mapk8ip2,Plppr4,Dlgap1,Camk2b,Dlgap3,Shank2,Psd3,Itpr1,Slc8a3,Map1a,Grip2,Cnksr2,Akap5,Shisa9,Bmpr2,Add3,Pcbp2,Syn2,Prkcg,Psd,Syn3,Prrt2,Dbn1,Mapk1,Kcnd3,Map1b,Pclo,Sorbs2,Bsn,Syngap1,Grin2a,Dnajc6,Map4,Palm,Epb41l3,Rtn4,Ptk2b,Rgs14,Sipa1l1,Cacna1c,Lzts1,Nos1,Shisa7,Gng3,Dmtn,Pacsin1,Shisa6,Kcnd2,Cdk5r1,Add2,Syn1,Tsc2,Shank3,Syt11,Dtnb,Crtc1,Ppp1r9a,Adgrl1,Mpp2,Capzb,Iqsec3,Gphn,Add1,Tn…
GO:0098794	postsynapse	4.311e-13	Map2,Ank2,Mapk8ip2,Plppr4,Dlgap1,Camk2b,Farp1,Dlgap3,Arhgap39,Shank2,Kcnb1,Psd3,Itpr1,Slc8a3,Ank1,Map1a,Grip2,Kif1a,Cnksr2,Akap5,Shisa9,Bmpr2,Add3,Pcbp2,Eif4g1,Syn2,Prkcg,Psd,Syn3,Prrt2,Dbn1,Mapk1,Pcdh8,Kcnd3,Map1b,Pclo,Sorbs2,Bsn,Syngap1,Grin2a,Dnajc6,Hip1,Map4,Palm,Epb41l3,Rtn4,Ptk2b,Ptk2,Rgs14,Gabra3,Sipa1l1,Cacna1c,Arhgap33,Lzts1,Dlgap4,Nos1,Shisa7,Gng3,Dmtn,Pacsin1,Napa,Shisa6,Kcnd2,Cdk5r1,A…
GO:0043005	neuron projection	5.93365e-11	Map2,Ero1a,Dcx,Unc13b,Lmtk2,Ank2,Nav1,Camk2b,Farp1,Dlgap3,Shank2,Kcnb1,Brsk1,Itpr1,Rnf6,Sh3kbp1,Slc8a3,Ank1,Hcn2,Map1a,Grip2,Kif1a,Cnksr2,Akap5,Fam126a,Shisa9,Bmpr2,Gprin1,Ybx1,Brd1,Dock4,Prkcg,Anks1,Psd,Prrt2,Dbn1,Mapk1,Tiam2,Pcdh8,Plcg1,Kcnd3,Maco1,Map1b,Pclo,Sorbs2,Synj1,Bsn,Coro1a,Syngap1,Camkk2,Grin2a,Map4,Palm,Atp2b4,Epb41l3,Tprg1l,Rtn4,Ptk2b,Ptk2,Rgs14,Mast1,Bin1,Gabra3,Sipa1l1,Cacna1c,Arh…
GO:0099536	synaptic signaling	1.96273e-10	Unc13b,Mapk8ip2,Dlgap1,Camk2b,Farp1,Dlgap3,Shank2,Kcnb1,Brsk1,Prkar1b,Ptpra,Slc8a3,Map1a,Grip2,Akap5,Akap12,Shisa9,Egfr,Syn2,Prkcg,Slc12a4,Syn3,Prrt2,Dbn1,Mapk1,Pcdh8,Plcg1,Map1b,Pclo,Sorbs2,Sqstm1,Syngap1,Grin2a,Plcl2,Tprg1l,Ptk2b,Cadps,Ptk2,Rgs14,Gabra3,Sipa1l1,Cacna1c,Lzts1,Dlgap4,Nos1,Cacna1b,Shisa7,Cacna1a,Nrxn1,Nrxn2,Pnkd,Napa,Shisa6,Cdk5r1,Rasgrf1,Syn1,Iqsec2,Syt7,Rgs8,Chrna4,Apba1,Nrg3,Ns…
GO:0030425	dendrite	2.0704e-10	Map2,Ero1a,Dcx,Camk2b,Farp1,Dlgap3,Shank2,Kcnb1,Itpr1,Slc8a3,Hcn2,Map1a,Grip2,Kif1a,Akap5,Shisa9,Bmpr2,Ybx1,Brd1,Prkcg,Psd,Prrt2,Dbn1,Mapk1,Pcdh8,Kcnd3,Map1b,Pclo,Sorbs2,Bsn,Syngap1,Grin2a,Palm,Rtn4,Ptk2b,Ptk2,Rgs14,Mast1,Bin1,Gabra3,Sipa1l1,Cacna1c,Arhgap33,Lzts1,Dennd1a,Dlgap4,Nos1,Cacna1b,Shisa7,Gng3,Cacna1a,Shisa6,Cobl,Kcnd2,Cdk5r1,Taok2,Rasgrf1,Syn1,Ddn,Syt7,Rgs8,Chrna4,Mapk8ip3,Apba1,Nsg1,J…
GO:0097447	dendritic tree	2.0704e-10	Map2,Ero1a,Dcx,Camk2b,Farp1,Dlgap3,Shank2,Kcnb1,Itpr1,Slc8a3,Hcn2,Map1a,Grip2,Kif1a,Akap5,Shisa9,Bmpr2,Ybx1,Brd1,Prkcg,Psd,Prrt2,Dbn1,Mapk1,Pcdh8,Kcnd3,Map1b,Pclo,Sorbs2,Bsn,Syngap1,Grin2a,Palm,Rtn4,Ptk2b,Ptk2,Rgs14,Mast1,Bin1,Gabra3,Sipa1l1,Cacna1c,Arhgap33,Lzts1,Dennd1a,Dlgap4,Nos1,Cacna1b,Shisa7,Gng3,Cacna1a,Shisa6,Cobl,Kcnd2,Cdk5r1,Taok2,Rasgrf1,Syn1,Ddn,Syt7,Rgs8,Chrna4,Mapk8ip3,Apba1,Nsg1,J…
GO:0098978	glutamatergic synapse	3.49126e-10	Unc13b,Plppr4,Dlgap1,Camk2b,Farp1,Dlgap3,Arhgap39,Shank2,Prkar1a,Prkar1b,Grip2,Cnksr2,Akap5,Shisa9,Syn2,Syn3,Prrt2,Dbn1,Pcdh8,Plcg1,Pclo,Bsn,Coro1a,Syngap1,Grin2a,Hip1,Atp2b4,Rtn4,Ptk2b,Cadps,Ptk2,Rgs14,Bin1,Sipa1l1,Cacna1c,Dlgap4,Nos1,Cacna1b,Shisa7,Cacna1a,Nrxn1,Pacsin1,Napa,Shisa6,Kcnd2,Add2,Syt7,Apba1,Nrg3,Nsg1,Gucy1b1,Itsn1,Shank3,Rims2,Sparcl1,Tpd52,Crtc1,Ppp1r9a,Adgrl1,Camkv,Mpp2,Psd2,Tnik…
GO:0036477	somatodendritic compartment	1.94611e-09	Map2,Ero1a,Dcx,Lmtk2,Mapk8ip2,Camk2b,Farp1,Dlgap3,Shank2,Kcnb1,Itpr1,Slc8a3,Hcn2,Map1a,Grip2,Kif1a,Cnksr2,Akap5,Akap12,Shisa9,Bmpr2,Ybx1,Brd1,Golga2,Prkcg,Psd,Prrt2,Dbn1,Mapk1,Tiam2,Pcdh8,Kcnd3,Map1b,Pclo,Sorbs2,Bsn,Syngap1,Grin2a,Palm,Rtn4,Ptk2b,Ptk2,Rgs14,Mast1,Bin1,Gabra3,Sipa1l1,Cacna1c,Arhgap33,Lzts1,Dennd1a,Dixdc1,Dlgap4,Nos1,Cacna1b,Shisa7,Gng3,Cacna1a,Nrxn1,Cpne5,Pde10a,Shisa6,Cobl,Kcnd2,…
GO:0099177	regulation of trans-synaptic signaling	2.17174e-09	Unc13b,Mapk8ip2,Dlgap1,Camk2b,Dlgap3,Shank2,Kcnb1,Brsk1,Prkar1b,Ptpra,Slc8a3,Map1a,Grip2,Akap5,Akap12,Shisa9,Egfr,Prkcg,Prrt2,Dbn1,Mapk1,Pcdh8,Plcg1,Map1b,Sqstm1,Syngap1,Grin2a,Plcl2,Tprg1l,Ptk2b,Ptk2,Rgs14,Sipa1l1,Lzts1,Dlgap4,Nos1,Cacna1b,Shisa7,Cacna1a,Nrxn1,Pnkd,Shisa6,Rasgrf1,Syn1,Iqsec2,Syt7,Chrna4,Apba1,Nrg3,Nsg1,Jph4,Shank3,Rims2,Crtc1,Sybu,Ppp1r9a,Mpp2,Afdn,Cacng2,Stxbp5l,Erbb4,Hrh1,Abr,…
GO:0050804	modulation of chemical synaptic transmission	2.17174e-09	Unc13b,Mapk8ip2,Dlgap1,Camk2b,Dlgap3,Shank2,Kcnb1,Brsk1,Prkar1b,Ptpra,Slc8a3,Map1a,Grip2,Akap5,Akap12,Shisa9,Egfr,Prkcg,Prrt2,Dbn1,Mapk1,Pcdh8,Plcg1,Map1b,Sqstm1,Syngap1,Grin2a,Plcl2,Tprg1l,Ptk2b,Ptk2,Rgs14,Sipa1l1,Lzts1,Dlgap4,Nos1,Cacna1b,Shisa7,Cacna1a,Nrxn1,Pnkd,Shisa6,Rasgrf1,Syn1,Iqsec2,Syt7,Chrna4,Apba1,Nrg3,Nsg1,Jph4,Shank3,Rims2,Crtc1,Sybu,Ppp1r9a,Mpp2,Afdn,Cacng2,Stxbp5l,Erbb4,Hrh1,Abr,…
GO:0099537	trans-synaptic signaling	3.94911e-09	Unc13b,Mapk8ip2,Dlgap1,Camk2b,Farp1,Dlgap3,Shank2,Kcnb1,Brsk1,Prkar1b,Ptpra,Slc8a3,Map1a,Grip2,Akap5,Akap12,Shisa9,Egfr,Syn2,Prkcg,Slc12a4,Syn3,Prrt2,Dbn1,Mapk1,Pcdh8,Plcg1,Map1b,Pclo,Sqstm1,Syngap1,Grin2a,Plcl2,Tprg1l,Ptk2b,Cadps,Ptk2,Rgs14,Gabra3,Sipa1l1,Cacna1c,Lzts1,Dlgap4,Nos1,Cacna1b,Shisa7,Cacna1a,Nrxn1,Nrxn2,Pnkd,Napa,Shisa6,Rasgrf1,Syn1,Iqsec2,Syt7,Chrna4,Apba1,Nrg3,Nsg1,Gucy1b1,Syt5,Jph…
GO:0007268	chemical synaptic transmission	1.51272e-08	Unc13b,Mapk8ip2,Dlgap1,Camk2b,Dlgap3,Shank2,Kcnb1,Brsk1,Prkar1b,Ptpra,Slc8a3,Map1a,Grip2,Akap5,Akap12,Shisa9,Egfr,Syn2,Prkcg,Slc12a4,Syn3,Prrt2,Dbn1,Mapk1,Pcdh8,Plcg1,Map1b,Pclo,Sqstm1,Syngap1,Grin2a,Plcl2,Tprg1l,Ptk2b,Cadps,Ptk2,Rgs14,Gabra3,Sipa1l1,Cacna1c,Lzts1,Dlgap4,Nos1,Cacna1b,Shisa7,Cacna1a,Nrxn1,Nrxn2,Pnkd,Napa,Shisa6,Rasgrf1,Syn1,Iqsec2,Syt7,Chrna4,Apba1,Nrg3,Nsg1,Gucy1b1,Syt5,Jph4,Shan…
GO:0098916	anterograde trans-synaptic signaling	1.51272e-08	Unc13b,Mapk8ip2,Dlgap1,Camk2b,Dlgap3,Shank2,Kcnb1,Brsk1,Prkar1b,Ptpra,Slc8a3,Map1a,Grip2,Akap5,Akap12,Shisa9,Egfr,Syn2,Prkcg,Slc12a4,Syn3,Prrt2,Dbn1,Mapk1,Pcdh8,Plcg1,Map1b,Pclo,Sqstm1,Syngap1,Grin2a,Plcl2,Tprg1l,Ptk2b,Cadps,Ptk2,Rgs14,Gabra3,Sipa1l1,Cacna1c,Lzts1,Dlgap4,Nos1,Cacna1b,Shisa7,Cacna1a,Nrxn1,Nrxn2,Pnkd,Napa,Shisa6,Rasgrf1,Syn1,Iqsec2,Syt7,Chrna4,Apba1,Nrg3,Nsg1,Gucy1b1,Syt5,Jph4,Shan…
GO:0042995	cell projection	2.59527e-08	Map2,Ero1a,Dcx,Unc13b,Lmtk2,Ank2,Nav1,Camk2b,Farp1,Dlgap3,Shank2,Kcnb1,Psd3,Brsk1,Itpr1,Prkar1a,Rnf6,Sh3kbp1,Cep170,Slc8a3,Ank1,Hcn2,Myo1e,Map1a,Grip2,Kif1a,Cnksr2,Akap5,Fam126a,Shisa9,Macf1,Bmpr2,Gprin1,Ybx1,Brd1,Jcad,Dock4,Prkcg,Anks1,Psd,Prrt2,Dbn1,Mapk1,Atg16l1,Tiam2,Pcdh8,Ttbk2,Plcg1,Kcnd3,Maco1,Map1b,Pclo,Sorbs2,Synj1,Bsn,Sqstm1,Coro1a,Syngap1,Camkk2,Grin2a,Map4,Palm,Atp2b4,Epb41l3,Osbpl3,T…
GO:0097060	synaptic membrane	4.10359e-08	Unc13b,Ank2,Plppr4,Dlgap1,Farp1,Shank2,Kcnb1,Itpr1,Ptpra,Slc8a3,Ank1,Grip2,Cnksr2,Akap5,Shisa9,Prkcg,Prrt2,Dbn1,Pcdh8,Kcnd3,Synj1,Bsn,Grin2a,Hip1,Palm,Atp2b4,Rtn4,Marcksl1,Gabra3,Cacna1c,Lzts1,Dennd1a,Shisa7,Cacna1a,Nrxn1,Nrxn2,Pacsin1,Shisa6,Kcnd2,Ddn,Syt7,Nbea,Chrna4,Apba1,Nsg1,Shank3,Rims2,Syt11,Adgrl1,Znrf2,Mpp2,Iqsec3,Gphn,Epn1,Cacng2,Tiam1,Erbb4,Exoc3,Syne1,Sorcs3,Atp2b1,Dagla,Ptprs,Ptprd,C…
GO:0120025	plasma membrane bounded cell projection	5.13809e-08	Map2,Ero1a,Dcx,Unc13b,Lmtk2,Ank2,Nav1,Camk2b,Farp1,Dlgap3,Shank2,Kcnb1,Psd3,Brsk1,Itpr1,Prkar1a,Rnf6,Sh3kbp1,Cep170,Slc8a3,Ank1,Hcn2,Myo1e,Map1a,Grip2,Kif1a,Cnksr2,Akap5,Fam126a,Shisa9,Bmpr2,Gprin1,Ybx1,Brd1,Jcad,Dock4,Prkcg,Anks1,Psd,Prrt2,Dbn1,Mapk1,Atg16l1,Tiam2,Pcdh8,Ttbk2,Plcg1,Kcnd3,Maco1,Map1b,Pclo,Sorbs2,Synj1,Bsn,Sqstm1,Coro1a,Syngap1,Camkk2,Grin2a,Map4,Palm,Atp2b4,Epb41l3,Osbpl3,Tprg1l,…
GO:0007267	cell-cell signaling	7.01813e-08	Unc13b,Chga,Ank2,Mapk8ip2,Dlgap1,Camk2b,Farp1,Dlgap3,Shank2,Kcnb1,Brsk1,Prkar1b,Amer2,Ptpra,Slc8a3,Map1a,Grip2,Akap5,Akap12,Shisa9,Egfr,Syn2,Prkcg,Slc12a4,Syn3,Prrt2,Dbn1,Rab11fip5,Mapk1,Pcdh8,Cd34,Zbed3,Plcg1,Map1b,Pclo,Sorbs2,Sqstm1,Syngap1,Grin2a,Smpd3,Rapgef1,Lats1,Smarca4,Plcl2,Tprg1l,Amer1,Rtn4,Ptk2b,Cadps,Ptk2,C2cd2l,Rgs14,Gabra3,Sipa1l1,Cacna1c,Lzts1,Dixdc1,Dlgap4,Cyld,Nos1,Cacna1b,Shisa7…
GO:0071944	cell periphery	7.25361e-08	Map2,Unc13b,Lmtk2,Cacna1h,Ank2,Akap6,Plppr4,Dlgap1,Ralgps2,Stim2,Farp1,Dlgap3,Obscn,Shank2,Kcnb1,Psd3,Itpr1,Prkar1a,Prkar1b,Hnrnpm,Amer2,Ptpra,Spart,Slc8a3,Ank1,Hcn2,Rai14,Myo1e,Grip2,Cnksr2,Akap5,Akap12,Fam126a,Shisa9,Egfr,Miga2,Serinc3,Bmpr2,Gprin1,Eps15l1,Add3,Itgax,Gramd1b,Jcad,Rgs3,Syn2,Dock4,Prkcg,Psd,Pcdh7,Prrt2,Pcdh1,Plxna1,Dbn1,Osbpl8,Mapk1,Pcdh8,Gab2,Cd34,Plcg1,Mlip,Kcnd3,Plxna4,Osbpl6,…
GO:0023052	signaling	3.24429e-07	Scg2,Map3k9,Nppc,Ero1a,Dcx,Unc13b,Lmtk2,Chga,Tp53bp1,Ank2,Mapk8ip2,Akap6,Mapkbp1,Arid1a,Plppr4,Dlgap1,Ralgps2,Selenos,Larp1,Camk2b,Gucy1a2,Farp1,Dlgap3,Arhgap39,Pdcd4,Nuak1,Shank2,Kcnb1,Psd3,Brsk1,Itpr1,Ncoa5,Prkar1a,Rnf6,G3bp2,Prkar1b,Amer2,Ptpra,Aida,Spart,Slc8a3,Ank1,Garem1,Myo1e,Map1a,Nyap2,Grip2,Cnksr2,Akap5,Akap12,Shisa9,Egfr,Serinc3,Bmpr2,Ybx1,Itgax,Pwp1,Jcad,Rgs3,Syn2,Dock4,Pikfyve,Prkcg,…
GO:0098590	plasma membrane region	1.04964e-06	Map2,Unc13b,Ank2,Akap6,Plppr4,Dlgap1,Farp1,Shank2,Kcnb1,Psd3,Itpr1,Prkar1a,Ptpra,Slc8a3,Ank1,Hcn2,Grip2,Cnksr2,Akap5,Shisa9,Egfr,Bmpr2,Eps15l1,Jcad,Prkcg,Psd,Prrt2,Dbn1,Mapk1,Pcdh8,Cd34,Plcg1,Kcnd3,Sorbs2,Synj1,Bsn,Grin2a,Hip1,Palm,Atp2b4,Epb41l3,Rtn4,Ptk2,C2cd2l,Hmcn2,Marcksl1,Gabra3,Cacna1c,Lzts1,Dennd1a,Nos1,Shisa7,Cacna1a,Nrxn1,Nrxn2,Plec,Dmtn,Pacsin1,Shisa6,Kcnd2,Myrip,Add2,Rasgrf1,Prickle2,…
GO:0007154	cell communication	1.101e-06	Scg2,Map3k9,Nppc,Ero1a,Dcx,Unc13b,Lmtk2,Chga,Tp53bp1,Ank2,Mapk8ip2,Akap6,Mapkbp1,Arid1a,Plppr4,Dlgap1,Ralgps2,Selenos,Larp1,Camk2b,Gucy1a2,Farp1,Dlgap3,Arhgap39,Pdcd4,Nuak1,Shank2,Kcnb1,Psd3,Brsk1,Itpr1,Ncoa5,Prkar1a,Rnf6,G3bp2,Prkar1b,Amer2,Ptpra,Aida,Spart,Slc8a3,Ank1,Garem1,Myo1e,Map1a,Nyap2,Grip2,Cnksr2,Akap5,Akap12,Shisa9,Egfr,Serinc3,Bmpr2,Ybx1,Itgax,Pwp1,Eif4g1,Jcad,Rgs3,Syn2,Dock4,Pikfyve…
GO:0005886	plasma membrane	1.54681e-06	Map2,Unc13b,Lmtk2,Cacna1h,Ank2,Akap6,Plppr4,Dlgap1,Ralgps2,Stim2,Farp1,Dlgap3,Obscn,Shank2,Kcnb1,Psd3,Itpr1,Prkar1a,Prkar1b,Amer2,Ptpra,Spart,Slc8a3,Ank1,Hcn2,Myo1e,Grip2,Cnksr2,Akap5,Akap12,Fam126a,Shisa9,Egfr,Miga2,Serinc3,Bmpr2,Gprin1,Eps15l1,Add3,Itgax,Gramd1b,Jcad,Rgs3,Syn2,Dock4,Prkcg,Psd,Pcdh7,Prrt2,Pcdh1,Plxna1,Dbn1,Mapk1,Pcdh8,Gab2,Cd34,Plcg1,Mlip,Kcnd3,Plxna4,Osbpl6,Ehbp1,Map1b,Sorbs2,S…
GO:0044309	neuron spine	1.65153e-06	Farp1,Dlgap3,Shank2,Slc8a3,Grip2,Akap5,Shisa9,Psd,Prrt2,Dbn1,Kcnd3,Map1b,Grin2a,Palm,Ptk2b,Ptk2,Rgs14,Sipa1l1,Arhgap33,Lzts1,Nos1,Shisa7,Shisa6,Kcnd2,Cdk5r1,Ddn,Apba1,Itsn1,Shank3,Syt11,Ppp1r9a,Mpp2,Capzb,Add1,Tanc2,Tiam1,Arhgap32,Abr,Cttnbp2,Syne1,Atp2b1,Dagla,Prkaca
GO:0043197	dendritic spine	2.35434e-06	Farp1,Dlgap3,Shank2,Slc8a3,Akap5,Shisa9,Psd,Prrt2,Dbn1,Kcnd3,Map1b,Grin2a,Palm,Ptk2b,Ptk2,Rgs14,Sipa1l1,Arhgap33,Lzts1,Nos1,Shisa7,Shisa6,Kcnd2,Cdk5r1,Ddn,Apba1,Itsn1,Shank3,Syt11,Ppp1r9a,Mpp2,Capzb,Add1,Tanc2,Tiam1,Arhgap32,Abr,Cttnbp2,Syne1,Atp2b1,Dagla,Prkaca
GO:0005856	cytoskeleton	7.09545e-05	Map2,Dcx,Peak1,Ank2,Chd3,Mapkbp1,Nudcd3,Hecw2,Nav1,Selenos,Camk2b,Farp1,Arhgap39,Nuak1,Shank2,Brsk1,Ncoa5,Prkar1a,Sh3kbp1,Cep170,Epb41l1,Slc8a3,Ank1,Rai14,Myo1e,Map1a,Kif21b,Kif1a,Akap5,Akap12,Macf1,Add3,Fam234b,Wdr47,Golga2,Smarca2,Hsph1,Ssh2,Dbn1,Rab11fip5,Spag9,Mapk1,Klhl4,Mtus2,Atg16l1,Ttbk2,Ttc28,Dido1,Ehbp1,Map1b,Pclo,Sorbs2,Synj1,Bsn,Coro1a,Hip1,Map4,Srcin1,Ercc2,Map2k2,Tuba1b,Lats1,Epb41l…
GO:0048167	regulation of synaptic plasticity	0.000118109	Unc13b,Camk2b,Shank2,Kcnb1,Brsk1,Slc8a3,Map1a,Akap5,Shisa9,Prkcg,Prrt2,Dbn1,Mapk1,Map1b,Sqstm1,Syngap1,Grin2a,Ptk2b,Rgs14,Sipa1l1,Lzts1,Nos1,Shisa7,Shisa6,Rasgrf1,Syn1,Syt7,Nsg1,Jph4,Shank3,Rims2,Crtc1,Ppp1r9a,Mpp2,Hrh1,Sorcs3
GO:0034330	cell junction organization	0.000126179	Unc13b,Peak1,Ank2,Dlgap1,Slc25a46,Camk2b,Farp1,Dlgap3,Arhgap39,Shank2,Ptpra,Slc8a3,Grip2,Kif1a,Cnksr2,Eif4g1,Dbn1,Pcdh8,Map1b,Pclo,Sorbs2,Bsn,Syngap1,Grin2a,Srcin1,Rapgef1,Palm,Nedd4l,Epb41l3,Slk,Ptk2b,Ptk2,Sipa1l1,Arhgap33,Shisa7,Cacna1a,Nrxn1,Nrxn2,Plec,Dmtn,Shisa6,Gpm6b,Cdk5r1,Dact1,Taok2,Add2,Syn1,Bcas3,Itsn1,Shank3,Rims2,Sparcl1,Sybu,Ppp1r9a,Adgrl1,Camkv,Prkca,Mpp2,Iqsec3,Gphn,Add1,Afdn,Tanc…
GO:0023051	regulation of signaling	0.000229089	Scg2,Map3k9,Nppc,Unc13b,Chga,Ank2,Mapk8ip2,Akap6,Mapkbp1,Dlgap1,Ralgps2,Selenos,Camk2b,Gucy1a2,Dlgap3,Pdcd4,Shank2,Kcnb1,Psd3,Brsk1,Itpr1,Ncoa5,Prkar1a,Rnf6,Prkar1b,Amer2,Ptpra,Aida,Spart,Slc8a3,Garem1,Map1a,Grip2,Cnksr2,Akap5,Akap12,Shisa9,Egfr,Serinc3,Bmpr2,Ybx1,Pwp1,Jcad,Rgs3,Prkcg,Anks1,Hsph1,Psd,Prrt2,Dbn1,Osbpl8,Rab11fip5,Spag9,Mapk1,Pcdh8,Ttbk2,Zbed3,Plcg1,Phf14,Gbf1,Map1b,Pum2,Sqstm1,Sipa…
GO:0010646	regulation of cell communication	0.000250037	Scg2,Map3k9,Nppc,Unc13b,Chga,Ank2,Mapk8ip2,Akap6,Mapkbp1,Dlgap1,Ralgps2,Selenos,Camk2b,Gucy1a2,Dlgap3,Pdcd4,Shank2,Kcnb1,Psd3,Brsk1,Itpr1,Ncoa5,Prkar1a,Rnf6,Prkar1b,Amer2,Ptpra,Aida,Spart,Slc8a3,Garem1,Map1a,Grip2,Cnksr2,Akap5,Akap12,Shisa9,Egfr,Serinc3,Bmpr2,Ybx1,Pwp1,Jcad,Rgs3,Prkcg,Anks1,Hsph1,Psd,Prrt2,Dbn1,Osbpl8,Rab11fip5,Spag9,Mapk1,Pcdh8,Ttbk2,Zbed3,Plcg1,Phf14,Gbf1,Map1b,Pum2,Sqstm1,Sipa…
GO:0031175	neuron projection development	0.000553983	Map2,Dcx,Lmtk2,Mapk8ip2,Plppr4,Hecw2,Slc25a46,Camk2b,Farp1,Shank2,Brsk1,Itpr1,Rnf6,Spart,Map1a,Nyap2,Kif1a,Akap5,Egfr,Bmpr2,Gprin1,Golga2,Psd,Plxna1,Dbn1,Spag9,Tiam2,Plxna4,Map1b,Syngap1,Map4,Plxna3,Srcin1,Map2k2,Rapgef1,Palm,Nedd4l,Nr4a3,Epb41l3,Top2b,Rtn4,Ptk2b,Ptk2,Sipa1l1,Arhgap33,Lzts1,Ube4b,Dixdc1,Cacna1a,Nrxn1,Cpne5,Runx1t1,Pacsin1,Camsap1,Cobl,Usp21,Gpm6b,Cdk5r1,Dact1,Taok2,Rasgrf1,Prickl…
GO:0007165	signal transduction	0.000580324	Scg2,Map3k9,Nppc,Ero1a,Dcx,Unc13b,Lmtk2,Chga,Tp53bp1,Ank2,Mapk8ip2,Akap6,Mapkbp1,Arid1a,Plppr4,Dlgap1,Ralgps2,Selenos,Larp1,Camk2b,Gucy1a2,Dlgap3,Arhgap39,Pdcd4,Nuak1,Shank2,Kcnb1,Psd3,Brsk1,Itpr1,Ncoa5,Prkar1a,Rnf6,G3bp2,Prkar1b,Amer2,Ptpra,Aida,Spart,Slc8a3,Ank1,Garem1,Myo1e,Nyap2,Grip2,Cnksr2,Akap5,Akap12,Shisa9,Egfr,Serinc3,Bmpr2,Ybx1,Itgax,Pwp1,Jcad,Rgs3,Dock4,Pikfyve,Prkcg,Anks1,Hsph1,Caski…
GO:0031256	leading edge membrane	0.000710367	Map2,Kcnb1,Psd3,Ank1,Hcn2,Akap5,Shisa9,Jcad,Psd,Plcg1,Palm,Epb41l3,Gabra3,Shisa7,Pacsin1,Shisa6,Ddn,Mapk8ip3,Plekho1,Mtss2,Mpp2,Psd2,Adam17,Tiam1,Wwc1,Sptbn1,Atp2b1,Slc12a5,Dagla
GO:0032989	cellular component morphogenesis	0.00114211	Map2,Dcx,Lmtk2,Ank2,Mapk8ip2,Plppr4,Hecw2,Slc25a46,Camk2b,Farp1,Shank2,Brsk1,Prkar1a,Rnf6,Spart,Map1a,Nyap2,Kif1a,Akap5,Egfr,Bmpr2,Golga2,Pikfyve,Plxna1,Dbn1,Spag9,Tiam2,Plxna4,Map1b,Syngap1,Phldb1,Plxna3,Srcin1,Ercc2,Map2k2,Nedd4l,Nr4a3,Epb41l3,Top2b,Rtn4,Ptk2,Sipa1l1,Arhgap33,Lzts1,Dixdc1,Cacna1a,Cpne5,Pacsin1,Cobl,Cdk5r1,Dact1,Taok2,Myo16,Celsr2,Mapk8ip3,Pak1,Shank3,Fez1,Plekho1,Rims2,Sema3g,P…
GO:0043025	neuronal cell body	0.00139695	Map2,Dcx,Lmtk2,Mapk8ip2,Camk2b,Dlgap3,Shank2,Kcnb1,Itpr1,Slc8a3,Hcn2,Map1a,Kif1a,Cnksr2,Akap5,Akap12,Bmpr2,Ybx1,Brd1,Golga2,Dbn1,Mapk1,Tiam2,Kcnd3,Map1b,Pclo,Sorbs2,Bsn,Rtn4,Ptk2b,Mast1,Sipa1l1,Cacna1c,Dennd1a,Dixdc1,Dlgap4,Cacna1b,Cacna1a,Nrxn1,Cpne5,Pde10a,Cobl,Kcnd2,Cdk5r1,Rasgrf1,Ddn,Syt7,Rgs8,Chrna4,Syt5,Itsn1,Stmn2,Fez1,Syt11,Kif3a,Crtc1,Ppp1r9a,Crmp1,Psd2,Capzb,Gphn,Tiam1,Sh3gl2,Unc5c,Nefh…
GO:0048468	cell development	0.00243791	Map2,Nppc,Myt1l,Dcx,Peak1,Lmtk2,Fndc3a,Ank2,Mapk8ip2,Akap6,Plppr4,Hecw2,Slc25a46,Camk2b,Farp1,Pdcd4,Shank2,Brsk1,Itpr1,Prkar1a,Rnf6,Ptpra,Spart,Naca,Ank1,Myo1e,Map1a,Nyap2,L3mbtl3,Grip2,Kif1a,Akap5,Egfr,Bmpr2,Gprin1,Brd1,Golga2,Smarca2,Anks1,Psd,Plxna1,Dbn1,Spag9,Mapk1,Tiam2,Plxna4,Map1b,Sorbs2,Synj1,Syngap1,Map4,Smpd3,Plxna3,Srcin1,Ercc2,Map2k2,Rapgef1,Palm,Lats1,Nedd4l,Smarca4,Nr4a3,Epb41l3,Top…
GO:0048812	neuron projection morphogenesis	0.0026204	Map2,Dcx,Lmtk2,Mapk8ip2,Plppr4,Hecw2,Slc25a46,Camk2b,Farp1,Shank2,Brsk1,Rnf6,Spart,Map1a,Nyap2,Kif1a,Akap5,Egfr,Bmpr2,Golga2,Plxna1,Dbn1,Spag9,Tiam2,Plxna4,Map1b,Syngap1,Plxna3,Srcin1,Map2k2,Nedd4l,Nr4a3,Epb41l3,Top2b,Rtn4,Ptk2,Sipa1l1,Arhgap33,Lzts1,Dixdc1,Cacna1a,Cpne5,Pacsin1,Cobl,Cdk5r1,Dact1,Taok2,Myo16,Celsr2,Mapk8ip3,Pak1,Shank3,Rims2,Sema3g,Ppp1r9a,Crmp1,Tnik,Afdn,Tanc2,Tiam1,Sh3gl2,Unc5c…
GO:0120039	plasma membrane bounded cell projection morphogenesis	0.00266923	Map2,Dcx,Lmtk2,Mapk8ip2,Plppr4,Hecw2,Slc25a46,Camk2b,Farp1,Shank2,Brsk1,Rnf6,Spart,Map1a,Nyap2,Kif1a,Akap5,Egfr,Bmpr2,Golga2,Plxna1,Dbn1,Spag9,Tiam2,Plxna4,Map1b,Syngap1,Plxna3,Srcin1,Map2k2,Nedd4l,Nr4a3,Epb41l3,Top2b,Rtn4,Ptk2,Sipa1l1,Arhgap33,Lzts1,Dixdc1,Cacna1a,Cpne5,Pacsin1,Cobl,Cdk5r1,Dact1,Taok2,Myo16,Celsr2,Mapk8ip3,Pak1,Shank3,Plekho1,Rims2,Sema3g,Ppp1r9a,Crmp1,Tnik,Afdn,Tanc2,Tiam1,Sh3g…
GO:0065007	biological regulation	0.00305832	Scg2,Map3k9,Ddx54,Map2,Nppc,Ero1a,Myt1l,Mia3,Dcx,Nsrp1,Unc13b,Peak1,Lmtk2,Chga,Cacna1h,Tp53bp1,Ank2,Chd3,Mapk8ip2,Akap6,Mapkbp1,Ncoa4,Pld3,Arid1a,Phf2,Plppr4,Hecw2,Rbm10,Dlgap1,Ralgps2,Hnrnpf,Selenos,Larp1,Cirbp,Stim2,Camk2b,Gucy1a2,Farp1,Dlgap3,Arhgap39,Pdcd4,Nuak1,Obscn,Shank2,Kcnb1,Psd3,Brsk1,Itpr1,Ncoa5,Prkar1a,Rnf6,G3bp2,Pphln1,Prkar1b,Sh3kbp1,Hnrnpm,Amer2,Ptpra,Aida,Spart,Naca,Slc8a3,Ank1,E…
GO:0030424	axon	0.00323537	Map2,Dcx,Unc13b,Lmtk2,Nav1,Shank2,Kcnb1,Brsk1,Rnf6,Slc8a3,Ank1,Hcn2,Map1a,Kif1a,Gprin1,Prkcg,Prrt2,Dbn1,Mapk1,Tiam2,Maco1,Map1b,Pclo,Bsn,Coro1a,Grin2a,Map4,Palm,Epb41l3,Tprg1l,Rtn4,Ptk2b,Mast1,Bin1,Dixdc1,Septin8,Nos1,Cacna1b,Nrxn1,Pacsin1,Cobl,Basp1,Cdk5r1,Taok2,Rasgrf1,Syn1,Syt7,Mapk8ip3,Map3k12,Stmn3,Syt5,Itsn1,Pak1,Stmn2,Fez1,Syt11,Kif3a,Sybu,Ppp1r9a,Adgrl1,Crmp1,Cables1,Afdn,Tanc2,Cacng2,Tia…
GO:0050789	regulation of biological process	0.00324075	Scg2,Map3k9,Ddx54,Map2,Nppc,Ero1a,Myt1l,Mia3,Dcx,Nsrp1,Unc13b,Peak1,Lmtk2,Chga,Cacna1h,Tp53bp1,Ank2,Chd3,Mapk8ip2,Akap6,Mapkbp1,Ncoa4,Pld3,Arid1a,Phf2,Plppr4,Hecw2,Rbm10,Dlgap1,Ralgps2,Hnrnpf,Selenos,Larp1,Cirbp,Stim2,Camk2b,Gucy1a2,Farp1,Dlgap3,Arhgap39,Pdcd4,Nuak1,Shank2,Kcnb1,Psd3,Brsk1,Itpr1,Ncoa5,Prkar1a,Rnf6,G3bp2,Pphln1,Prkar1b,Sh3kbp1,Hnrnpm,Amer2,Ptpra,Aida,Spart,Naca,Slc8a3,Ank1,Emsy,Hc…
GO:0048858	cell projection morphogenesis	0.00353424	Map2,Dcx,Lmtk2,Mapk8ip2,Plppr4,Hecw2,Slc25a46,Camk2b,Farp1,Shank2,Brsk1,Rnf6,Spart,Map1a,Nyap2,Kif1a,Akap5,Egfr,Bmpr2,Golga2,Plxna1,Dbn1,Spag9,Tiam2,Plxna4,Map1b,Syngap1,Plxna3,Srcin1,Map2k2,Nedd4l,Nr4a3,Epb41l3,Top2b,Rtn4,Ptk2,Sipa1l1,Arhgap33,Lzts1,Dixdc1,Cacna1a,Cpne5,Pacsin1,Cobl,Cdk5r1,Dact1,Taok2,Myo16,Celsr2,Mapk8ip3,Pak1,Shank3,Plekho1,Rims2,Sema3g,Ppp1r9a,Crmp1,Tnik,Afdn,Tanc2,Tiam1,Sh3g…
GO:0048699	generation of neurons	0.00353638	Map2,Myt1l,Dcx,Lmtk2,Mapk8ip2,Plppr4,Hecw2,Nav1,Slc25a46,Camk2b,Farp1,Shank2,Brsk1,Itpr1,Rnf6,Ptpra,Spart,Map1a,Nyap2,Grip2,Kif1a,Akap5,Hdac5,Egfr,Bmpr2,Gprin1,Eif4g1,Golga2,Anks1,Psd,Plxna1,Dbn1,Spag9,Tiam2,Plxna4,Map1b,Synj1,Syngap1,Map4,Plxna3,Srcin1,Ercc2,Map2k2,Rapgef1,Palm,Nedd4l,Nr4a3,Epb41l3,Top2b,Rtn4,Ptk2b,Ptk2,Hmg20a,Rgs14,Bin1,Sipa1l1,Arhgap33,Lzts1,Ube4b,Dixdc1,Nos1,Cacna1a,Nrxn1,Cpn…
GO:0032589	neuron projection membrane	0.00374272	Kcnb1,Ank1,Hcn2,Akap5,Shisa9,Palm,Epb41l3,Gabra3,Shisa7,Shisa6,Ddn,Mapk8ip3,Mpp2,Sptbn1,Atp2b1,Slc12a5,Dagla
GO:0050794	regulation of cellular process	0.00380544	Scg2,Map3k9,Ddx54,Map2,Nppc,Ero1a,Myt1l,Mia3,Dcx,Nsrp1,Unc13b,Peak1,Lmtk2,Chga,Tp53bp1,Ank2,Chd3,Mapk8ip2,Akap6,Mapkbp1,Ncoa4,Arid1a,Phf2,Plppr4,Hecw2,Rbm10,Dlgap1,Ralgps2,Hnrnpf,Selenos,Larp1,Cirbp,Stim2,Camk2b,Gucy1a2,Farp1,Dlgap3,Arhgap39,Pdcd4,Nuak1,Shank2,Kcnb1,Psd3,Brsk1,Itpr1,Ncoa5,Prkar1a,Rnf6,G3bp2,Pphln1,Prkar1b,Sh3kbp1,Hnrnpm,Amer2,Ptpra,Aida,Spart,Naca,Slc8a3,Ank1,Emsy,Hcn2,Garem1,Myo…
GO:0032990	cell part morphogenesis	0.00429334	Map2,Dcx,Lmtk2,Mapk8ip2,Plppr4,Hecw2,Slc25a46,Camk2b,Farp1,Shank2,Brsk1,Rnf6,Spart,Map1a,Nyap2,Kif1a,Akap5,Egfr,Bmpr2,Golga2,Plxna1,Dbn1,Spag9,Tiam2,Plxna4,Map1b,Syngap1,Plxna3,Srcin1,Map2k2,Nedd4l,Nr4a3,Epb41l3,Top2b,Rtn4,Ptk2,Sipa1l1,Arhgap33,Lzts1,Dixdc1,Cacna1a,Cpne5,Pacsin1,Cobl,Cdk5r1,Dact1,Taok2,Myo16,Celsr2,Mapk8ip3,Pak1,Shank3,Fez1,Plekho1,Rims2,Sema3g,Ppp1r9a,Crmp1,Tnik,Afdn,Tanc2,Tiam1…
GO:0048666	neuron development	0.00431508	Map2,Myt1l,Dcx,Lmtk2,Mapk8ip2,Plppr4,Hecw2,Slc25a46,Camk2b,Farp1,Shank2,Brsk1,Itpr1,Rnf6,Spart,Map1a,Nyap2,Grip2,Kif1a,Akap5,Egfr,Bmpr2,Gprin1,Golga2,Anks1,Psd,Plxna1,Dbn1,Spag9,Tiam2,Plxna4,Map1b,Syngap1,Map4,Plxna3,Srcin1,Map2k2,Rapgef1,Palm,Nedd4l,Nr4a3,Epb41l3,Top2b,Rtn4,Ptk2b,Ptk2,Sipa1l1,Arhgap33,Lzts1,Ube4b,Dixdc1,Cacna1a,Nrxn1,Cpne5,Runx1t1,Pacsin1,Camsap1,Cobl,Usp21,Gpm6b,Cdk5r1,Dact1,Ta…
GO:0050808	synapse organization	0.00477992	Unc13b,Dlgap1,Slc25a46,Camk2b,Farp1,Dlgap3,Arhgap39,Shank2,Slc8a3,Grip2,Kif1a,Cnksr2,Eif4g1,Dbn1,Pcdh8,Map1b,Pclo,Sorbs2,Bsn,Syngap1,Grin2a,Srcin1,Palm,Ptk2,Sipa1l1,Arhgap33,Shisa7,Cacna1a,Nrxn1,Nrxn2,Shisa6,Cdk5r1,Dact1,Add2,Syn1,Itsn1,Shank3,Rims2,Sparcl1,Sybu,Ppp1r9a,Adgrl1,Camkv,Mpp2,Iqsec3,Gphn,Afdn,Tanc2,Cacng2,Tiam1,Erbb4,Cttnbp2,Nefh,Ptprs,Ptprd,Crkl
GO:0022603	regulation of anatomical structure morphogenesis	0.00674221	Map2,Dcx,Hecw2,Camk2b,Brsk1,Rnf6,Sh3kbp1,Spart,Kif1a,Akap5,Bmpr2,Itgax,Jcad,Golga2,Plxna1,Dbn1,Spag9,Tiam2,Cd34,Plcg1,Plxna4,Map1b,Coro1a,Syngap1,Phldb1,Plxna3,Srcin1,Map2k2,Palm,Nedd4l,Atp2b4,Epb41l3,Rtn4,Ptk2b,Ptk2,Fgd4,Sipa1l1,Arhgap33,Lzts1,Dixdc1,Cacna1a,Dmtn,Cpne5,Camsap1,Cdk5r1,Dact1,Taok2,Pak1,Shank3,Plekho1,Rims2,Sema3g,Kif3a,Ppp1r9a,Itgb8,Prkca,Capzb,Epn1,Add1,Tnik,Afdn,Tanc2,Ppp1r16b,C…
GO:0016358	dendrite development	0.00711921	Map2,Dcx,Mapk8ip2,Hecw2,Slc25a46,Camk2b,Farp1,Shank2,Map1a,Kif1a,Akap5,Dbn1,Map1b,Syngap1,Srcin1,Palm,Nedd4l,Sipa1l1,Arhgap33,Lzts1,Cacna1a,Pacsin1,Cobl,Cdk5r1,Dact1,Taok2,Celsr2,Itsn1,Shank3,Crtc1,Ppp1r9a,Tnik,Afdn,Tanc2,Tiam1,Syne1,Fat3,Slc12a5,Ptprs,Ptprd,Crkl
GO:0098685	Schaffer collateral - CA1 synapse	0.00752107	Itpr1,Prkar1b,Ptpra,Akap12,Syn2,Pcdh8,Plcg1,Bsn,Cacna1b,Nrxn1,Syn1,Iqsec2,Apba1,Syt11,Mpp2,Capzb,Epn1,Cacng2,Sh3gl2,Abr,Nefh,Ptprs,Ptprd
GO:0048471	perinuclear region of cytoplasm	0.00801363	Lmtk2,Chga,Ank2,Akap6,Itpr1,Slc8a3,Tra2b,Akap5,Egfr,Ybx1,Jcad,Golga2,Pikfyve,Prkcg,Dbn1,Spag9,Cd34,Kcnd3,Osbpl6,Map1b,Pclo,Sorbs2,Pum2,Map2k2,Rapgef1,Trappc12,Synrg,Osbpl3,Pacs1,Slk,Ptk2b,Ptk2,Cyld,Nos1,Plec,Dmtn,Pacsin1,Cobl,Kcnd2,Cdk5r1,Myrip,Myo16,Mapk8ip3,Apba1,Stmn3,Tsc2,Syt5,Stmn2,Fmn2,Bicd1,Syt11,Tpd52,Jag2,Eml1,Capzb,Add1,Tnik,Pkp4,Ppp1r16b,Ranbp2,Hcn4,Wwc1,Sh3gl2,Exoc3,Syne1,Rangap1,Serb…
GO:0045211	postsynaptic membrane	0.00830999	Ank2,Plppr4,Dlgap1,Farp1,Shank2,Kcnb1,Slc8a3,Ank1,Grip2,Cnksr2,Shisa9,Prrt2,Dbn1,Pcdh8,Kcnd3,Grin2a,Hip1,Rtn4,Gabra3,Cacna1c,Lzts1,Shisa7,Pacsin1,Shisa6,Kcnd2,Ddn,Nbea,Chrna4,Nsg1,Shank3,Mpp2,Iqsec3,Gphn,Epn1,Cacng2,Tiam1,Erbb4,Syne1,Sorcs3,Dagla,Ptprs,Crkl
GO:0032879	regulation of localization	0.00974702	Map2,Nppc,Ero1a,Mia3,Dcx,Unc13b,Chga,Ank2,Mapk8ip2,Akap6,Hecw2,Stim2,Camk2b,Shank2,Kcnb1,Itpr1,Prkar1b,Hnrnpm,Hcn2,Map1a,Grip2,Akap5,Akap12,Shisa9,Snap91,Egfr,Bmpr2,Itgax,Jcad,Dock4,Prkcg,Hsph1,Ssh2,Prrt2,Plxna1,Dbn1,Osbpl8,Rab11fip5,Spag9,Mapk1,Rubcn,Ttbk2,Plcg1,Kcnd3,Plxna4,Osbpl6,Gbf1,Map1b,Pclo,Sorbs2,Synj1,Bsn,Sqstm1,Coro1a,Grin2a,Dnajc6,Hip1,Smpd3,Plxna3,Srcin1,Map2k2,Rapgef1,Lats1,Nedd4l,A…
GO:0099003	vesicle-mediated transport in synapse	0.0115221	Unc13b,Brsk1,Prkar1b,Grip2,Akap5,Syn2,Prkcg,Syn3,Prrt2,Kiaa1109,Pclo,Synj1,Bsn,Dnajc6,Cadps,Bin1,Dennd1a,Cacna1b,Cacna1a,Nrxn1,Pacsin1,Napa,Cdk5r1,Syn1,Syt7,Chrna4,Apba1,Nsg1,Syt5,Itsn1,Rims2,Syt11,Stxbp5l,Sh3gl2,Syne1,Prkaca
GO:0051716	cellular response to stimulus	0.013199	Scg2,Map3k9,Map2,Nppc,Ero1a,Mia3,Dcx,Unc13b,Lmtk2,Chga,Cacna1h,Tp53bp1,Ank2,Mapk8ip2,Akap6,Mapkbp1,Arid1a,Plppr4,Dlgap1,Ralgps2,Selenos,Larp1,Cirbp,Camk2b,Gucy1a2,Dlgap3,Arhgap39,Pdcd4,Nuak1,Shank2,Kcnb1,Psd3,Brsk1,Itpr1,Ncoa5,Prkar1a,Rnf6,G3bp2,Prkar1b,Hnrnpm,Amer2,Ptpra,Aida,Spart,Slc8a3,Ank1,Emsy,Hcn2,Garem1,Myo1e,Nyap2,Tra2b,Grip2,Cnksr2,Akap5,Akap12,Shisa9,Hdac5,Egfr,Serinc3,Bmpr2,Ybx1,Itgax…
GO:0044297	cell body	0.0143501	Map2,Dcx,Lmtk2,Mapk8ip2,Camk2b,Dlgap3,Shank2,Kcnb1,Itpr1,Slc8a3,Hcn2,Map1a,Kif1a,Cnksr2,Akap5,Akap12,Bmpr2,Ybx1,Brd1,Golga2,Dbn1,Mapk1,Tiam2,Kcnd3,Map1b,Pclo,Sorbs2,Bsn,Rtn4,Ptk2b,Mast1,Sipa1l1,Cacna1c,Lzts1,Dennd1a,Dixdc1,Dlgap4,Cacna1b,Gng3,Cacna1a,Nrxn1,Cpne5,Pde10a,Cobl,Kcnd2,Cdk5r1,Rasgrf1,Ddn,Syt7,Rgs8,Chrna4,Mapk8ip3,Syt5,Itsn1,Stmn2,Fez1,Syt11,Kif3a,Crtc1,Ppp1r9a,Crmp1,Psd2,Capzb,Gphn,Tia…
GO:0030182	neuron differentiation	0.0145332	Map2,Myt1l,Dcx,Lmtk2,Mapk8ip2,Plppr4,Hecw2,Slc25a46,Camk2b,Farp1,Shank2,Brsk1,Itpr1,Rnf6,Spart,Map1a,Nyap2,Grip2,Kif1a,Akap5,Hdac5,Egfr,Bmpr2,Gprin1,Eif4g1,Golga2,Anks1,Psd,Plxna1,Dbn1,Spag9,Tiam2,Plxna4,Map1b,Syngap1,Map4,Plxna3,Srcin1,Ercc2,Map2k2,Rapgef1,Palm,Nedd4l,Nr4a3,Epb41l3,Top2b,Rtn4,Ptk2b,Ptk2,Hmg20a,Bin1,Sipa1l1,Arhgap33,Lzts1,Ube4b,Dixdc1,Cacna1a,Nrxn1,Cpne5,Runx1t1,Pacsin1,Camsap1,N…
GO:0016020	membrane	0.0158233	Map2,Ero1a,Mia3,Unc13b,Lmtk2,Fndc3a,Cacna1h,Ank2,Akap6,Pld3,Plppr4,Dlgap1,Slc25a46,Ralgps2,Selenos,Stim2,Camk2b,Farp1,Dlgap3,Tmem245,Obscn,Shank2,Kcnb1,Psd3,Itpr1,Prkar1a,Coro7,Rnf6,Prkar1b,Sh3kbp1,Amer2,Ptpra,Aida,Plppr3,Spart,Slc8a3,Ank1,Hcn2,Myo1e,Tra2b,Grip2,Kif1a,Cnksr2,Osbpl5,Akap5,Akap12,Fam126a,Shisa9,Snap91,Macf1,Hdac5,Egfr,Miga2,Serinc3,Bmpr2,Gprin1,Eps15l1,Add3,Ybx1,Fam234b,Itgax,Gramd…
GO:0120036	plasma membrane bounded cell projection organization	0.0158496	Map2,Dcx,Lmtk2,Mapk8ip2,Nudcd3,Plppr4,Hecw2,Slc25a46,Camk2b,Farp1,Shank2,Brsk1,Itpr1,Rnf6,Spart,Map1a,Nyap2,Kif1a,Akap5,Egfr,Bmpr2,Gprin1,Golga2,Psd,Plxna1,Dbn1,Spag9,Tiam2,Ttbk2,Plxna4,Map1b,Coro1a,Syngap1,Grin2a,Map4,Plxna3,Srcin1,Map2k2,Rapgef1,Palm,Nedd4l,Nr4a3,Epb41l3,Top2b,Rtn4,Ptk2b,Ptk2,Fgd4,Sipa1l1,Rab23,Arhgap33,Lzts1,Ube4b,Dixdc1,Cyld,Cacna1a,Nrxn1,Dmtn,Cpne5,Runx1t1,Pacsin1,Camsap1,Pt…
GO:0022008	neurogenesis	0.016484	Map2,Myt1l,Dcx,Lmtk2,Mapk8ip2,Plppr4,Hecw2,Nav1,Slc25a46,Camk2b,Farp1,Shank2,Brsk1,Itpr1,Rnf6,Ptpra,Spart,Slc8a3,Map1a,Nyap2,Grip2,Kif1a,Akap5,Hdac5,Egfr,Bmpr2,Gprin1,Eif4g1,Golga2,Anks1,Psd,Plxna1,Dbn1,Spag9,Mapk1,Tiam2,Plxna4,Map1b,Synj1,Syngap1,Grin2a,Map4,Plxna3,Srcin1,Ercc2,Map2k2,Rapgef1,Palm,Nedd4l,Smarca4,Nr4a3,Epb41l3,Top2b,Rtn4,Ptk2b,Ptk2,Hmg20a,Rgs14,Bin1,Sipa1l1,Arhgap33,Lzts1,Ube4b,D…
GO:0000902	cell morphogenesis	0.0170877	Map2,Dcx,Peak1,Lmtk2,Mapk8ip2,Plppr4,Hecw2,Slc25a46,Camk2b,Farp1,Shank2,Brsk1,Rnf6,Sh3kbp1,Spart,Map1a,Nyap2,Kif1a,Akap5,Egfr,Bmpr2,Golga2,Plxna1,Dbn1,Spag9,Tiam2,Plxna4,Map1b,Coro1a,Syngap1,Plxna3,Srcin1,Map2k2,Palm,Lats1,Nedd4l,Smarca4,Nr4a3,Epb41l3,Top2b,Rtn4,Ptk2b,Ptk2,Fgd4,Sipa1l1,Arhgap33,Lzts1,Dixdc1,Cacna1a,Dmtn,Cpne5,Pacsin1,Camsap1,Cobl,Cdk5r1,Dact1,Taok2,Myo16,Celsr2,Mapk8ip3,Pak1,Shan…
GO:0120035	regulation of plasma membrane bounded cell projection organization	0.0176064	Map2,Dcx,Hecw2,Camk2b,Brsk1,Itpr1,Rnf6,Spart,Kif1a,Akap5,Bmpr2,Golga2,Plxna1,Dbn1,Tiam2,Ttbk2,Plxna4,Map1b,Syngap1,Map4,Plxna3,Srcin1,Map2k2,Rapgef1,Palm,Nedd4l,Rtn4,Ptk2b,Ptk2,Sipa1l1,Arhgap33,Lzts1,Dixdc1,Cyld,Cacna1a,Nrxn1,Dmtn,Runx1t1,Pacsin1,Cobl,Cdk5r1,Bcas3,Pak1,Stmn2,Shank3,Fez1,Sema3g,Crtc1,Ppp1r9a,Crmp1,Tbc1d30,Capzb,Tnik,Afdn,Tanc2,Adam17,Ppp1r16b,Tiam1,Syne1,Fat3,Crocc,Ptprs,Ptprd,Crk…
GO:0032590	dendrite membrane	0.0176369	Kcnb1,Hcn2,Akap5,Shisa9,Palm,Gabra3,Shisa7,Shisa6,Ddn,Mpp2,Atp2b1,Slc12a5,Dagla
GO:0065008	regulation of biological quality	0.021022	Map2,Ero1a,Dcx,Unc13b,Chga,Cacna1h,Ank2,Mapk8ip2,Akap6,Ncoa4,Rbm10,Selenos,Larp1,Cirbp,Stim2,Camk2b,Farp1,Shank2,Kcnb1,Brsk1,Itpr1,Ncoa5,Rnf6,Sh3kbp1,Hnrnpm,Spart,Slc8a3,Ank1,Hcn2,Map1a,L3mbtl3,Tra2b,Grip2,Kif1a,Akap5,Akap12,Shisa9,Egfr,Dtd1,Bmpr2,Add3,Ybx1,Brd1,Gramd1b,Eif4g1,Larp4b,Syn2,Dock4,Prkcg,Slc12a4,Syn3,Ssh2,Prrt2,Plxna1,Dbn1,Rab11fip5,Mapk1,Pcdh8,Cd34,Zbed3,Plcg1,Kcnd3,Plxna4,Map1b,Pcl…
GO:0010975	regulation of neuron projection development	0.0217819	Map2,Dcx,Hecw2,Camk2b,Brsk1,Itpr1,Rnf6,Spart,Kif1a,Akap5,Bmpr2,Golga2,Plxna1,Dbn1,Tiam2,Plxna4,Map1b,Syngap1,Plxna3,Srcin1,Map2k2,Rapgef1,Nedd4l,Rtn4,Ptk2b,Ptk2,Sipa1l1,Arhgap33,Lzts1,Dixdc1,Cacna1a,Runx1t1,Pacsin1,Cobl,Cdk5r1,Pak1,Stmn2,Shank3,Fez1,Sema3g,Crtc1,Ppp1r9a,Crmp1,Tnik,Afdn,Tanc2,Adam17,Tiam1,Syne1,Fat3,Ptprs,Ptprd,Crkl
GO:0150034	distal axon	0.0301294	Map2,Dcx,Unc13b,Lmtk2,Shank2,Brsk1,Slc8a3,Gprin1,Prkcg,Prrt2,Dbn1,Tiam2,Map1b,Pclo,Grin2a,Tprg1l,Rtn4,Ptk2b,Bin1,Dixdc1,Nos1,Cacna1b,Nrxn1,Pacsin1,Cobl,Basp1,Cdk5r1,Taok2,Rasgrf1,Syt7,Mapk8ip3,Map3k12,Stmn3,Itsn1,Stmn2,Fez1,Syt11,Ppp1r9a,Adgrl1,Crmp1,Cables1,Tiam1,Exoc3,Unc5c,Ptbp2,Ptprs
GO:0030030	cell projection organization	0.0307556	Map2,Dcx,Lmtk2,Mapk8ip2,Nudcd3,Plppr4,Hecw2,Slc25a46,Camk2b,Farp1,Shank2,Brsk1,Itpr1,Rnf6,Spart,Map1a,Nyap2,Kif1a,Akap5,Egfr,Bmpr2,Gprin1,Golga2,Psd,Plxna1,Dbn1,Spag9,Tiam2,Ttbk2,Plxna4,Map1b,Coro1a,Syngap1,Grin2a,Map4,Plxna3,Srcin1,Map2k2,Rapgef1,Palm,Nedd4l,Nr4a3,Epb41l3,Top2b,Rtn4,Ptk2b,Ptk2,Fgd4,Sipa1l1,Rab23,Arhgap33,Lzts1,Ube4b,Dixdc1,Cyld,Cacna1a,Nrxn1,Dmtn,Cpne5,Runx1t1,Pacsin1,Camsap1,Pt…
GO:0051049	regulation of transport	0.0342915	Map2,Nppc,Dcx,Unc13b,Chga,Ank2,Mapk8ip2,Akap6,Hecw2,Stim2,Shank2,Kcnb1,Itpr1,Prkar1b,Hnrnpm,Hcn2,Akap5,Shisa9,Snap91,Egfr,Prkcg,Prrt2,Dbn1,Osbpl8,Rab11fip5,Mapk1,Rubcn,Plcg1,Kcnd3,Osbpl6,Map1b,Pclo,Synj1,Bsn,Coro1a,Grin2a,Dnajc6,Hip1,Smpd3,Map2k2,Rapgef1,Nedd4l,Atp2b4,Nr4a3,Rtn4,Ptk2b,Cadps,Ptk2,C2cd2l,Bin1,Cacna1c,Rab23,Apbb3,Septin8,Nos1,Cacna1b,Cacna1a,Nrxn1,Dmtn,Lrsam1,Pnkd,Pacsin1,Cacna1i,Sh…
GO:0031344	regulation of cell projection organization	0.0351817	Map2,Dcx,Hecw2,Camk2b,Brsk1,Itpr1,Rnf6,Spart,Kif1a,Akap5,Bmpr2,Golga2,Plxna1,Dbn1,Tiam2,Ttbk2,Plxna4,Map1b,Syngap1,Map4,Plxna3,Srcin1,Map2k2,Rapgef1,Palm,Nedd4l,Rtn4,Ptk2b,Ptk2,Sipa1l1,Arhgap33,Lzts1,Dixdc1,Cyld,Cacna1a,Nrxn1,Dmtn,Runx1t1,Pacsin1,Cobl,Cdk5r1,Bcas3,Pak1,Stmn2,Shank3,Fez1,Sema3g,Crtc1,Ppp1r9a,Crmp1,Tbc1d30,Capzb,Tnik,Afdn,Tanc2,Adam17,Ppp1r16b,Tiam1,Syne1,Fat3,Crocc,Ptprs,Ptprd,Crk…
GO:0032591	dendritic spine membrane	0.0365726	Akap5,Shisa9,Palm,Shisa7,Shisa6,Ddn,Atp2b1,Dagla
GO:0007399	nervous system development	0.0439593	Map2,Myt1l,Dcx,Unc13b,Lmtk2,Ank2,Mapk8ip2,Arid1a,Plppr4,Hecw2,Nav1,Slc25a46,Camk2b,Farp1,Shank2,Brsk1,Itpr1,Rnf6,Ptpra,Spart,Slc8a3,Map1a,Nyap2,Tra2b,Grip2,Kif1a,Akap5,Fam126a,Hdac5,Egfr,Bmpr2,Gprin1,Itgax,Eif4g1,Golga2,Pikfyve,Prkcg,Anks1,Psd,Plxna1,Dbn1,Spag9,Mapk1,Tiam2,Ttbk2,Plxna4,Maco1,Map1b,Pclo,Synj1,Bsn,Syngap1,Grin2a,Map4,Plxna3,Srcin1,Ercc2,Map2k2,Rapgef1,Palm,Nedd4l,Atp2b4,Smarca4,Nr4…

## Sheet: Table S2B. BIC Cluster 2
GO.ID	Description	FDR	Genes
WP:000000	WIKIPATHWAYS	0.00978746	Adamts1,Ptgs2,Glg1,Celf1,Ptbp1,Nisch,Pabpc1,Jun,Jund,Eef1b,Lmnb1,Cltc,Hnrnpl,Tardbp,Rtn4,Eef1d,Ryr2,Eif3b,Ybx1,Dst,Hnrnpa3,Rplp0,Mta1,Camk4,Rbbp7,Fos,Puf60,Dnmt3a,Hnrnph2,Junb,Nr4a2,Eprs1,Hnrnpk,Hnrnpc,Rock2,Matr3,Ptpra,Map2,Slc1a2,Pde1b,Arhgap5,Ehmt2,Msh2,Hnrnpa1,Actg1,Acly,Nos1,Slbp,Chd4,Zeb1,Ncl,Hnrnpf,Ptdss2,Celf6,Irs2,Actn4,Sfpq,Rps27a,Tbc1d1,Zfr,Atrx,Hsp90aa1,Ktn1,Cox6c,Shc3,Fbl,Prpf8,Ywhag…
GO:0043226	organelle	0.0191572	Nefm,Adamts1,Ptgs2,Sel1l,Nomo1,Canx,Pgap1,Glg1,Mia3,Celf1,Psip1,Ptbp1,Nisch,Spty2d1,Nfil3,Ccar1,Sccpdh,Numa1,Pabpc1,Cenpv,Rab6b,Jun,Jund,Stk24,Eef1b,Lmnb1,Cbr1,Cltc,Hnrnpl,Fosb,Set,Tardbp,Psd3,Nsmce2,Rtn4,Eef1d,Plrg1,Ryr2,Shank1,Ybx1,Dst,Hnrnpa3,Golga3,Ttbk2,Rplp0,Mta1,Camk4,Rbbp7,Fkbp3,Fos,Puf60,Dnmt3a,Hnrnph2,Junb,Nr4a2,Dctn1,Myo9b,Larp4b,Mlc1,Rufy2,Hnrnpk,Hnrnpc,Rock2,Ssr3,Thrap3,Tmx4,Tmcc1,Se…
GO:1904949	ATPase complex	0.0406923	Mta1,Rbbp7,Chd4,Nfrkb,Atp1a1,Vcp,Atp2a2,Smarcc2,Smarce1,Arid1a,Arid1b,Chd3,Rbbp4,Rfc1,Atp1b1,Dpf2,Pbrm1,Mta3
WP:WP385	Myometrial Relaxation and Contraction Pathways	0.0473276	Jun,Ryr2,Fos,Actg1,Nos1,Ywhag,Prkcz,Atp2a2,Ywhaz,Itpr1,Gnb1,Plcg1,Atf4,Adcy8,Ywhae,Atf3

## Sheet: Table S2C. BIC Cluster 3
GO.ID	Description	FDR	Genes
GO:0031981	nuclear lumen	5.83023e-11	Champ1,Rprd2,Sin3a,Sugp2,Ubp1,Enc1,Mta1,Nipbl,Atf2,Hnrnpc,Lmna,Thrap3,Epc2,Znf687,Rai1,Zranb2,Sub1,Lig3,Rtf1,Rbm22,Baz1b,Trim28,Gtf2i,Tfip11,Ddx27,Mllt10,Rnf2,Ppp3ca,Map2,Spen,Gpkow,Htatsf1,Bclaf1,Ankrd12,Pom121,Tcf20,Prkra,Wiz,Polr1b,Kdm5b,Stau2,Emd,Irf2bpl,Sugp1,Secisbp2,Pnisr,Mllt3,Ranbp2,Ddi2,Larp4b,Rbfox2,Ncoa6,Zfp638,Mkln1,Ahctf1,Mga,Ncoa5,Khdrbs1,Nup153,Polr1f,Irf2bp2,Prrc2a,Emsy,Dapk3,U2a…
GO:0005654	nucleoplasm	1.04962e-10	Champ1,Rprd2,Sin3a,Sugp2,Ubp1,Enc1,Mta1,Nipbl,Atf2,Hnrnpc,Lmna,Thrap3,Epc2,Znf687,Rai1,Zranb2,Sub1,Lig3,Rtf1,Rbm22,Baz1b,Trim28,Gtf2i,Tfip11,Mllt10,Rnf2,Ppp3ca,Spen,Gpkow,Htatsf1,Bclaf1,Ankrd12,Pom121,Tcf20,Prkra,Wiz,Polr1b,Kdm5b,Emd,Irf2bpl,Sugp1,Secisbp2,Pnisr,Mllt3,Ranbp2,Ddi2,Rbfox2,Ncoa6,Zfp638,Mkln1,Ahctf1,Mga,Ncoa5,Khdrbs1,Nup153,Irf2bp2,Prrc2a,Emsy,Dapk3,U2af1,Pex19,Ppp1r10,Acin1,Mtdh,Pnn…
GO:0006397	mRNA processing	1.07904e-09	Rprd2,Sugp2,Hnrnpc,Thrap3,Zranb2,Rbm22,Tfip11,Gpkow,Htatsf1,Sugp1,Rbfox2,Elavl4,Khdrbs1,U2af1,Acin1,Pnn,Ncbp1,Zc3h14,Kin,Rbm26,Rbbp6,Ddx39a,Supt6h,Sympk,Rbmxl1,Zc3h13,Hnrnpu,Nono,Snw1,Rbmx2,Mettl3,Rbm6,Scaf1,Srsf6,Srrm2,Bud13,Rbm39,Hnrnpa2b1,Rbm27,Nup98,Znf830,Ybx1,Hnrnpf,Rbmx,Nelfe,Cwc25,Cdk13,Safb,Fxr1,Son,Ncbp3,Sltm,Srsf12,Cdc5l,Ddx5,Ddx20,Rbm5,Srsf7,Psip1,Prpf4b,Pcf11,Wtap,Rbm15b,Npm1,Srsf10,…
GO:0008380	RNA splicing	9.66692e-09	Sugp2,Hnrnpc,Thrap3,Zranb2,Rbm22,Tfip11,Gpkow,Htatsf1,Sugp1,Rbfox2,Zfp638,Elavl4,Khdrbs1,U2af1,Acin1,Pnn,Ncbp1,Ddx39a,Supt6h,Taf15,Rbmxl1,Zc3h13,Hnrnpu,Nono,Snw1,Rbmx2,Mettl3,Rbm6,Scaf1,Srsf6,Hnrnph3,Srrm2,Bud13,Rbm39,Hnrnpa2b1,Nup98,Znf830,Ybx1,Hnrnpf,Rbmx,Cwc25,Cdk13,Fxr1,Son,Ccdc130,Srsf12,Cdc5l,Ddx5,Ddx20,Rbm5,Srsf7,Psip1,Prpf4b,Wtap,Rbm15b,Npm1,Srsf10,Khdrbs3,Prpf38a,Hnrnpm,Hnrnph2,Clasrp,Sr…
GO:0036477	somatodendritic compartment	2.01213e-08	Shank2,Enc1,Gria4,Gtf2i,Ppp3ca,Map2,Shank1,Stau2,Grin3a,Elavl4,Shroom2,Hcn1,Zc3h14,Ank3,Adnp,Rtn4,Dagla,Gabbr1,Exoc4,Zmynd8,Hnrnpu,Lmtk2,Pde1a,Map1b,Map6,Akap5,Mbp,Nedd4,Nsg2,Grm5,Stmn2,Adra2a,Magi2,Rptor,Gopc,Hnrnpa2b1,Amfr,G3bp1,Ybx1,Chrm1,Myo5a,Afdn,Sncb,Dlgap4,Map1a,Farp1,Picalm,Eif4b,Dbn1,Mark2,Fxr1,Akap9,Mapk8ip1,Strn3,Optn,Prex1,Arhgef2,Arhgef7,Inpp5f,Hip1r,Itsn1,Kcnd3,Dlg2,Erc2,Ica1,Hcfc1…
WP:WP310	mRNA processing	3.90963e-08	Sugp2,Hnrnpc,Elavl3,Rbm22,Spen,Htatsf1,Bclaf1,Sugp1,Secisbp2,Rbfox2,Zfp638,Elavl4,U2af1,Acin1,Atxn1,Ddx3x,Rbm26,Matr3,Ddx39a,Taf15,Rbmxl1,Hnrnpu,Nono,Ciz1,Rbmx2,Mettl3,Rbm6,Srsf6,Rbm39,Hnrnpa2b1,G3bp1,Znf830,Ybx1,Hnrnpf,Rbmx,Nelfe,Dnajc8,Ergic2,Fxr1,Son,Sltm,Srsf12,Ddx5,Ddx20,Rbm5,Srsf7,Prpf4b,Rbm15b,Npm1,Srsf10,Pum1,Hnrnpm,Alkbh8,Hnrnph2,Clasrp,Brwd1,Nol8,Hnrnpa0,Cnot4,Rnps1,Ralyl,Rnmt,U2surp,Sr…
GO:0005634	nucleus	1.01832e-07	Champ1,Rprd2,Sin3a,Sugp2,Ubp1,Enc1,Mta1,Nipbl,Atf2,Hnrnpc,Lmna,Thrap3,Epc2,Znf687,Rai1,Zranb2,Sub1,Lig3,Rtf1,Rbm22,Fam169a,Baz1b,Trim28,Gtf2i,Tfip11,Ddx27,Mllt10,Rnf2,Ppp3ca,Map2,Spen,Gpkow,Htatsf1,Bclaf1,Ankrd12,Pom121,Tcf20,Prkra,Wiz,Polr1b,Kdm5b,Stau2,Emd,Irf2bpl,Sugp1,Rev1,Trim33,Secisbp2,Pnisr,Mllt3,Ranbp2,Setd2,Ddi2,Larp4b,Rbfox2,Ncoa6,Zfp638,Elavl4,Mkln1,Irx4,Ahctf1,Mga,Ptpn12,Ncoa5,Khdrbs…
GO:0098794	postsynapse	2.07684e-07	Shank2,Gria4,Ppp3ca,Map2,Shank1,Grin3a,Mkln1,Atxn1,Ank3,Rtn4,Dagla,Gabbr1,Exoc4,Zmynd8,Eps8,Bcl11a,Map1b,Akap5,Nedd4,Grm5,Camk2g,Adra2a,Magi2,Gopc,Hnrnpa2b1,Pdzd2,Chrm1,Myo5a,Mecp2,Dlgap4,Map1a,Farp1,Plppr4,Picalm,Rps6kc1,Map4,Eif4b,Kcna3,Dbn1,Dgkq,Fxr1,Lrrtm4,Akap9,Mef2c,Arhgef2,Arhgef7,Hip1r,Itsn1,Kcnd3,Dlg2,Erc2,Ophn1,Grin2b,Sipa1l1,Pclo,Camk2b,Synpo,Grk2,Ank2,Dclk1,Tsc2,Gria1,Syndig1,Sos1,Pak…
GO:0030425	dendrite	3.52873e-07	Shank2,Gria4,Ppp3ca,Map2,Shank1,Stau2,Elavl4,Hcn1,Zc3h14,Ank3,Adnp,Rtn4,Dagla,Gabbr1,Exoc4,Zmynd8,Hnrnpu,Map1b,Map6,Akap5,Nedd4,Nsg2,Grm5,Magi2,Rptor,Gopc,Amfr,Ybx1,Chrm1,Myo5a,Dlgap4,Map1a,Farp1,Eif4b,Dbn1,Mark2,Fxr1,Akap9,Mapk8ip1,Strn3,Prex1,Arhgef2,Inpp5f,Hip1r,Itsn1,Kcnd3,Dlg2,Ica1,Hcfc1,Ophn1,Clip2,Sipa1l1,Pclo,Camk2b,Synpo,Grk2,Gria1,Amigo1,Syndig1,Strn,Atxn10,Adgrb1,Psd,Sort1,Hcn2,Rufy3,A…
GO:0097447	dendritic tree	3.52873e-07	Shank2,Gria4,Ppp3ca,Map2,Shank1,Stau2,Elavl4,Hcn1,Zc3h14,Ank3,Adnp,Rtn4,Dagla,Gabbr1,Exoc4,Zmynd8,Hnrnpu,Map1b,Map6,Akap5,Nedd4,Nsg2,Grm5,Magi2,Rptor,Gopc,Amfr,Ybx1,Chrm1,Myo5a,Dlgap4,Map1a,Farp1,Eif4b,Dbn1,Mark2,Fxr1,Akap9,Mapk8ip1,Strn3,Prex1,Arhgef2,Inpp5f,Hip1r,Itsn1,Kcnd3,Dlg2,Ica1,Hcfc1,Ophn1,Clip2,Sipa1l1,Pclo,Camk2b,Synpo,Grk2,Gria1,Amigo1,Syndig1,Strn,Atxn10,Adgrb1,Psd,Sort1,Hcn2,Rufy3,A…
GO:0016071	mRNA metabolic process	4.27241e-07	Rprd2,Sugp2,Hnrnpc,Thrap3,Zranb2,Rbm22,Tfip11,Gpkow,Htatsf1,Sugp1,Secisbp2,Larp4b,Rbfox2,Elavl4,Khdrbs1,U2af1,Acin1,Pnn,Ncbp1,Zc3h14,Kin,Rbm26,Rbbp6,Cbll1,Ddx39a,Supt6h,Taf15,Sympk,Rbmxl1,Zc3h13,Hnrnpu,Gspt2,Nono,Snw1,Rbmx2,Mettl3,Rbm6,Scaf1,Srsf6,Srrm2,Bud13,Rbm39,Hnrnpa2b1,Rbm27,Nup98,Znf830,Ybx1,Hnrnpf,Ythdf1,Rbmx,Nelfe,Cebpg,Cwc25,Cdk13,Safb,Fxr1,Son,Ncbp3,Sltm,Srsf12,Cdc5l,Patl1,Ddx5,Ddx20,R…
GO:0031974	membrane-enclosed lumen	7.19453e-07	Champ1,Rprd2,Sin3a,Sugp2,Ubp1,Enc1,Mta1,Nipbl,Atf2,Hnrnpc,Lmna,Thrap3,Epc2,Znf687,Rai1,Zranb2,Sub1,Lig3,Rtf1,Rbm22,Baz1b,Trim28,Gtf2i,Tfip11,Ddx27,Mllt10,Rnf2,Ppp3ca,Map2,Spen,Gpkow,Htatsf1,Bclaf1,Ankrd12,Pom121,Tcf20,Prkra,Wiz,Polr1b,Kdm5b,Stau2,Emd,Irf2bpl,Sugp1,Secisbp2,Pnisr,Mllt3,Ranbp2,Ddi2,Larp4b,Rbfox2,Ncoa6,Zfp638,Mkln1,Ahctf1,Mga,Ncoa5,Khdrbs1,Nup153,Polr1f,Irf2bp2,Prrc2a,Emsy,Dapk3,U2a…
GO:0070013	intracellular organelle lumen	7.19453e-07	Champ1,Rprd2,Sin3a,Sugp2,Ubp1,Enc1,Mta1,Nipbl,Atf2,Hnrnpc,Lmna,Thrap3,Epc2,Znf687,Rai1,Zranb2,Sub1,Lig3,Rtf1,Rbm22,Baz1b,Trim28,Gtf2i,Tfip11,Ddx27,Mllt10,Rnf2,Ppp3ca,Map2,Spen,Gpkow,Htatsf1,Bclaf1,Ankrd12,Pom121,Tcf20,Prkra,Wiz,Polr1b,Kdm5b,Stau2,Emd,Irf2bpl,Sugp1,Secisbp2,Pnisr,Mllt3,Ranbp2,Ddi2,Larp4b,Rbfox2,Ncoa6,Zfp638,Mkln1,Ahctf1,Mga,Ncoa5,Khdrbs1,Nup153,Polr1f,Irf2bp2,Prrc2a,Emsy,Dapk3,U2a…
GO:0043233	organelle lumen	7.19453e-07	Champ1,Rprd2,Sin3a,Sugp2,Ubp1,Enc1,Mta1,Nipbl,Atf2,Hnrnpc,Lmna,Thrap3,Epc2,Znf687,Rai1,Zranb2,Sub1,Lig3,Rtf1,Rbm22,Baz1b,Trim28,Gtf2i,Tfip11,Ddx27,Mllt10,Rnf2,Ppp3ca,Map2,Spen,Gpkow,Htatsf1,Bclaf1,Ankrd12,Pom121,Tcf20,Prkra,Wiz,Polr1b,Kdm5b,Stau2,Emd,Irf2bpl,Sugp1,Secisbp2,Pnisr,Mllt3,Ranbp2,Ddi2,Larp4b,Rbfox2,Ncoa6,Zfp638,Mkln1,Ahctf1,Mga,Ncoa5,Khdrbs1,Nup153,Polr1f,Irf2bp2,Prrc2a,Emsy,Dapk3,U2a…
GO:0043005	neuron projection	2.77792e-06	Shank2,Gria4,Ppp3ca,Map2,Shank1,Nav1,Oprl1,Stau2,Sybu,Grin3a,Elavl4,Kif13b,Hcn1,Zc3h14,Ank3,Adnp,Eea1,Rtn4,Dagla,Gabbr1,Exoc4,Zmynd8,Hnrnpu,Eps8,Lmtk2,Map1b,Map6,Akap5,Ap3b2,Mbp,Nedd4,Gprin1,Rap1gap2,Nsg2,Grm5,Stmn2,Camk2g,Adra2a,Magi2,Rptor,Gopc,Hnrnpa2b1,Map9,Amfr,Pdzd2,Ybx1,Kifap3,Creb1,Adgrl3,Chrm1,Myo5a,Afdn,Sncb,Dlgap4,Map1a,Farp1,Picalm,Slc4a7,Map4,Eif4b,Kcna3,Dbn1,Mark2,Fxr1,Ripor2,Akap9,…
GO:0099572	postsynaptic specialization	1.30139e-05	Shank2,Gria4,Map2,Shank1,Grin3a,Rtn4,Dagla,Exoc4,Eps8,Bcl11a,Map1b,Akap5,Grm5,Camk2g,Adra2a,Magi2,Gopc,Pdzd2,Chrm1,Dlgap4,Map1a,Plppr4,Picalm,Rps6kc1,Map4,Dbn1,Fxr1,Lrrtm4,Akap9,Arhgef2,Hip1r,Kcnd3,Dlg2,Erc2,Sipa1l1,Pclo,Camk2b,Synpo,Ank2,Dclk1,Tsc2,Gria1,Syndig1,Sos1,Pak3,Strn,Gabrb3,Adgrb1,Psd,Tnik,Hnrnph2,Psd3,Cacng4,Rnf112,Dmtn,Ppp1r9a,Mapt,Gabra1,Add2,Nf1,Bsn,Gabra2,Slc16a7,Gabra5,Pja2,Epb41…
GO:0140513	nuclear protein-containing complex	1.89209e-05	Rprd2,Sin3a,Mta1,Nipbl,Atf2,Hnrnpc,Thrap3,Epc2,Rtf1,Rbm22,Trim28,Tfip11,Rnf2,Gpkow,Htatsf1,Bclaf1,Pom121,Polr1b,Sugp1,Mllt3,Ranbp2,Ncoa6,Ahctf1,Mga,Nup153,Polr1f,U2af1,Acin1,Pnn,Gatad2b,Phf14,Adnp,Nup210,Supt6h,Mbd3,Sympk,Rbmxl1,Hnrnpu,Nono,Nup50,Phc1,Gle1,Snw1,Rbmx2,Phc3,Chd4,Kmt2a,Men1,Kdm2b,Brpf3,Mcm3ap,Srrm2,Bud13,Rsf1,R3hcc1,Wac,Hnrnpa2b1,Rfxap,Nup98,Znf830,Pbrm1,Ybx1,Hnrnpf,Heatr1,Cbx5,Creb…
GO:0000398	mRNA splicing, via spliceosome	2.60188e-05	Hnrnpc,Thrap3,Rbm22,Tfip11,Gpkow,Htatsf1,Rbfox2,Khdrbs1,U2af1,Acin1,Ncbp1,Ddx39a,Rbmxl1,Hnrnpu,Nono,Snw1,Rbmx2,Mettl3,Rbm6,Srsf6,Srrm2,Bud13,Rbm39,Hnrnpa2b1,Nup98,Rbmx,Cwc25,Cdk13,Fxr1,Son,Srsf12,Cdc5l,Ddx5,Ddx20,Rbm5,Srsf7,Psip1,Prpf4b,Wtap,Rbm15b,Npm1,Srsf10,Khdrbs3,Prpf38a,Hnrnpm,Srrm4,Luc7l3,Cwf19l2,Rnps1,Ncbp2,Fmr1,Rbm14,Rbm8a,Hnrnpl,Srpk2,Rbm10,Coil,Hnrnpa1
GO:0000377	RNA splicing, via transesterification reactions with bulged adenosine as nucleophile	2.60188e-05	Hnrnpc,Thrap3,Rbm22,Tfip11,Gpkow,Htatsf1,Rbfox2,Khdrbs1,U2af1,Acin1,Ncbp1,Ddx39a,Rbmxl1,Hnrnpu,Nono,Snw1,Rbmx2,Mettl3,Rbm6,Srsf6,Srrm2,Bud13,Rbm39,Hnrnpa2b1,Nup98,Rbmx,Cwc25,Cdk13,Fxr1,Son,Srsf12,Cdc5l,Ddx5,Ddx20,Rbm5,Srsf7,Psip1,Prpf4b,Wtap,Rbm15b,Npm1,Srsf10,Khdrbs3,Prpf38a,Hnrnpm,Srrm4,Luc7l3,Cwf19l2,Rnps1,Ncbp2,Fmr1,Rbm14,Rbm8a,Hnrnpl,Srpk2,Rbm10,Coil,Hnrnpa1
GO:0000375	RNA splicing, via transesterification reactions	2.60188e-05	Hnrnpc,Thrap3,Rbm22,Tfip11,Gpkow,Htatsf1,Rbfox2,Khdrbs1,U2af1,Acin1,Ncbp1,Ddx39a,Rbmxl1,Hnrnpu,Nono,Snw1,Rbmx2,Mettl3,Rbm6,Srsf6,Srrm2,Bud13,Rbm39,Hnrnpa2b1,Nup98,Rbmx,Cwc25,Cdk13,Fxr1,Son,Srsf12,Cdc5l,Ddx5,Ddx20,Rbm5,Srsf7,Psip1,Prpf4b,Wtap,Rbm15b,Npm1,Srsf10,Khdrbs3,Prpf38a,Hnrnpm,Srrm4,Luc7l3,Cwf19l2,Rnps1,Ncbp2,Fmr1,Rbm14,Rbm8a,Hnrnpl,Srpk2,Rbm10,Coil,Hnrnpa1
GO:0014069	postsynaptic density	4.33146e-05	Shank2,Gria4,Map2,Shank1,Grin3a,Rtn4,Dagla,Exoc4,Eps8,Bcl11a,Map1b,Akap5,Grm5,Camk2g,Adra2a,Magi2,Gopc,Pdzd2,Chrm1,Map1a,Plppr4,Picalm,Rps6kc1,Map4,Dbn1,Fxr1,Lrrtm4,Akap9,Arhgef2,Hip1r,Kcnd3,Dlg2,Erc2,Sipa1l1,Pclo,Camk2b,Synpo,Ank2,Dclk1,Tsc2,Gria1,Syndig1,Sos1,Pak3,Strn,Adgrb1,Psd,Tnik,Hnrnph2,Psd3,Cacng4,Rnf112,Dmtn,Ppp1r9a,Mapt,Add2,Nf1,Bsn,Slc16a7,Pja2,Epb41l3,Shank3,Tiam1,Camk2a,Atp2b2,Fyn,N…
GO:0032279	asymmetric synapse	4.88572e-05	Shank2,Gria4,Map2,Shank1,Grin3a,Rtn4,Dagla,Exoc4,Eps8,Bcl11a,Map1b,Akap5,Grm5,Camk2g,Adra2a,Magi2,Gopc,Pdzd2,Chrm1,Map1a,Plppr4,Picalm,Rps6kc1,Map4,Dbn1,Fxr1,Lrrtm4,Akap9,Arhgef2,Hip1r,Kcnd3,Dlg2,Erc2,Sipa1l1,Pclo,Camk2b,Synpo,Ank2,Dclk1,Tsc2,Gria1,Syndig1,Sos1,Pak3,Strn,Adgrb1,Psd,Tnik,Hnrnph2,Psd3,Cacng4,Rnf112,Dmtn,Ppp1r9a,Mapt,Add2,Nf1,Bsn,Slc16a7,Pja2,Epb41l3,Slc4a8,Shank3,Tiam1,Camk2a,Atp2b…
GO:0098984	neuron to neuron synapse	4.97371e-05	Shank2,Gria4,Stxbp5,Map2,Shank1,Grin3a,Rtn4,Dagla,Exoc4,Eps8,Bcl11a,Map1b,Akap5,Grm5,Camk2g,Adra2a,Magi2,Gopc,Pdzd2,Prkar1b,Chrm1,Map1a,Plppr4,Picalm,Rps6kc1,Map4,Dbn1,Fxr1,Lrrtm4,Akap9,Arhgef2,Hip1r,Kcnd3,Dlg2,Erc2,Sipa1l1,Pclo,Camk2b,Synpo,Ank2,Dclk1,Tsc2,Gria1,Syndig1,Sos1,Pak3,Strn,Adgrb1,Psd,Tnik,Hnrnph2,Psd3,Cacng4,Rnf112,Dmtn,Ppp1r9a,Mapt,Add2,Nf1,Bsn,Slc16a7,Pja2,Epb41l3,Slc4a8,Shank3,Tia…
GO:0006396	RNA processing	6.02189e-05	Rprd2,Sugp2,Hnrnpc,Thrap3,Zranb2,Rbm22,Tfip11,Ddx27,Ppp3ca,Gpkow,Htatsf1,Prkra,Sugp1,Rbfox2,Zfp638,Elavl4,Khdrbs1,U2af1,Acin1,Pnn,Ncbp1,Zc3h14,Ddx3x,Kin,Rbm26,Rbbp6,Ddx39a,Supt6h,Taf15,Sympk,Rbmxl1,Zc3h13,Hnrnpu,Nono,Snw1,Rbmx2,Mettl3,Rbm6,Scaf1,Srsf6,Hnrnph3,Srrm2,Bud13,Rbm39,Hnrnpa2b1,Rbm27,Nup98,Znf830,Ybx1,Hnrnpf,Heatr1,Rbmx,Nelfe,Mecp2,Ints12,Cwc25,Cdk13,Safb,Fxr1,Son,Ncbp3,Ccdc130,Sltm,Ncor…
GO:0048024	regulation of mRNA splicing, via spliceosome	6.67291e-05	Thrap3,Rbfox2,Khdrbs1,Acin1,Ncbp1,Rbmxl1,Hnrnpu,Snw1,Srsf6,Rbm39,Hnrnpa2b1,Nup98,Rbmx,Fxr1,Son,Srsf12,Ddx5,Rbm5,Srsf7,Wtap,Rbm15b,Npm1,Srsf10,Khdrbs3,Srrm4,Rnps1,Fmr1,Rbm8a,Hnrnpl,Rbm10
GO:0050684	regulation of mRNA processing	0.000139881	Thrap3,Rbfox2,Khdrbs1,Acin1,Ncbp1,Zc3h14,Supt6h,Rbmxl1,Hnrnpu,Snw1,Srsf6,Rbm39,Hnrnpa2b1,Nup98,Rbmx,Nelfe,Safb,Fxr1,Son,Sltm,Srsf12,Ddx5,Rbm5,Srsf7,Wtap,Rbm15b,Npm1,Srsf10,Khdrbs3,Cdc73,Srrm4,Rnps1,Ncbp2,Fmr1,Rbm8a,Hnrnpl,Rbm10
GO:0043197	dendritic spine	0.000152131	Shank2,Gria4,Ppp3ca,Shank1,Dagla,Gabbr1,Zmynd8,Map1b,Akap5,Nedd4,Grm5,Farp1,Dbn1,Fxr1,Hip1r,Itsn1,Kcnd3,Ophn1,Sipa1l1,Synpo,Grk2,Gria1,Syndig1,Strn,Adgrb1,Psd,Atp2b1,Ppp1r9a,Syne1,Shank3,Actn1,Ppfia2,Tiam1,Camk2a,Ppp1r1b,Hpca,Rph3a,Ddn,Nos1,Cttn,Hap1,Srgap2,Dnm3,Arhgap32,Tanc2,Fmr1,Grid2,Dnm1,Lzts3,Nsmf,Ppp1r2,Strn4,Neurl1
GO:0043025	neuronal cell body	0.000157827	Shank2,Enc1,Gria4,Gtf2i,Map2,Stau2,Grin3a,Elavl4,Shroom2,Hcn1,Adnp,Rtn4,Gabbr1,Exoc4,Lmtk2,Pde1a,Map1b,Akap5,Mbp,Stmn2,Adra2a,Rptor,Hnrnpa2b1,Amfr,G3bp1,Ybx1,Myo5a,Sncb,Dlgap4,Map1a,Picalm,Eif4b,Dbn1,Fxr1,Akap9,Strn3,Optn,Arhgef2,Arhgef7,Inpp5f,Hip1r,Itsn1,Kcnd3,Dlg2,Erc2,Hcfc1,Sipa1l1,Pclo,Camk2b,Synpo,Gria1,Amigo1,Sos1,Klc1,Strn,Scn3a,Atxn10,Sort1,Wdfy3,Hcn2,Rufy3,Atp2b1,Kif1a,Dcx,Rnf112,Ppp1r9…
GO:0044309	neuron spine	0.000161439	Shank2,Gria4,Ppp3ca,Shank1,Eea1,Dagla,Gabbr1,Zmynd8,Map1b,Akap5,Nedd4,Grm5,Farp1,Dbn1,Fxr1,Hip1r,Itsn1,Kcnd3,Ophn1,Sipa1l1,Synpo,Grk2,Gria1,Syndig1,Strn,Adgrb1,Psd,Atp2b1,Ppp1r9a,Syne1,Shank3,Actn1,Ppfia2,Tiam1,Camk2a,Ppp1r1b,Hpca,Rph3a,Ddn,Nos1,Cttn,Hap1,Srgap2,Dnm3,Arhgap32,Tanc2,Fmr1,Grid2,Dnm1,Lzts3,Nsmf,Ppp1r2,Strn4,Neurl1
GO:0043226	organelle	0.000169153	Tbcd,Champ1,Shank2,Rprd2,Sin3a,Sugp2,Ubp1,Enc1,Mta1,Nipbl,Atf2,Hnrnpc,Lmna,Thrap3,Epc2,Znf687,Rai1,Zranb2,Sub1,Lig3,Rtf1,Gria4,Rbm22,Fam169a,Baz1b,Trim28,Gtf2i,Stxbp5,Tfip11,Ddx27,Mllt10,Rnf2,Ppp3ca,Map2,Spen,Shank1,Gpkow,Htatsf1,Bclaf1,Ankrd12,Pom121,Tcf20,Nav1,Oprl1,Prkra,Wiz,Polr1b,Cfdp1,Kdm5b,Stau2,Emd,Irf2bpl,Sybu,Sugp1,Rev1,Fam8a1,Grin3a,Trim33,Secisbp2,Pnisr,Mllt3,Ranbp2,Setd2,Ddi2,Larp4b,…
GO:0043484	regulation of RNA splicing	0.000732064	Thrap3,Rbm22,Rbfox2,Khdrbs1,Acin1,Ncbp1,Rbmxl1,Hnrnpu,Snw1,Srsf6,Hnrnph3,Rbm39,Hnrnpa2b1,Nup98,Hnrnpf,Rbmx,Fxr1,Son,Srsf12,Ddx5,Rbm5,Srsf7,Wtap,Rbm15b,Npm1,Srsf10,Khdrbs3,Hnrnph2,Srrm4,Rnps1,Rbm12b2,Fmr1,Rbm8a,Hnrnpl,Rbm10,Rrp1b
GO:0016070	RNA metabolic process	0.000842985	Rprd2,Sin3a,Sugp2,Ubp1,Mta1,Nipbl,Atf2,Hnrnpc,Thrap3,Epc2,Rai1,Zranb2,Sub1,Rtf1,Rbm22,Trim28,Gtf2i,Tfip11,Ddx27,Mllt10,Rnf2,Ppp3ca,Spen,Gpkow,Htatsf1,Bclaf1,Tcf20,Pphln1,Prkra,Wiz,Polr1b,Kdm5b,Irf2bpl,Sugp1,Secisbp2,Mllt3,Setd2,Ddi2,Larp4b,Rbfox2,Ncoa6,Zfp638,Elavl4,Irx4,Mga,Khdrbs1,Polr1f,Irf2bp2,Emsy,U2af1,Acin1,Mtdh,Pnn,Gatad2b,Ncbp1,Zc3h14,Phf14,Atxn1,Ddx3x,Arid2,Kin,Rbm26,Rbbp6,Cbll1,Ddx39a,…
GO:0044297	cell body	0.000895243	Shank2,Enc1,Gria4,Gtf2i,Map2,Stau2,Grin3a,Elavl4,Shroom2,Hcn1,Adnp,Rtn4,Gabbr1,Exoc4,Lmtk2,Pde1a,Map1b,Akap5,Mbp,Stmn2,Adra2a,Rptor,Hnrnpa2b1,Amfr,G3bp1,Ybx1,Myo5a,Sncb,Dlgap4,Map1a,Picalm,Eif4b,Dbn1,Fxr1,Akap9,Mapk8ip1,Strn3,Optn,Arhgef2,Arhgef7,Inpp5f,Hip1r,Itsn1,Kcnd3,Dlg2,Erc2,Hcfc1,Sipa1l1,Pclo,Camk2b,Synpo,Gria1,Amigo1,Syndig1,Cct3,Sos1,Klc1,Strn,Scn3a,Atxn10,Pitpnm1,Sort1,Wdfy3,Hcn2,Rufy3,…
GO:0000381	regulation of alternative mRNA splicing, via spliceosome	0.00123485	Thrap3,Rbfox2,Khdrbs1,Rbmxl1,Hnrnpu,Srsf6,Rbmx,Fxr1,Srsf12,Ddx5,Rbm5,Wtap,Rbm15b,Khdrbs3,Srrm4,Rnps1,Fmr1,Rbm8a,Hnrnpl,Rbm10
GO:0016358	dendrite development	0.00170994	Shank2,Ppp3ca,Map2,Shank1,Stau2,Grin3a,Rbfox2,Elavl4,Zmynd8,Bcl11a,Map1b,Map6,Akap5,Nedd4,Mecp2,Afdn,Map1a,Farp1,Picalm,Dbn1,Mef2c,Prex1,Itsn1,Sipa1l1,Camk2b,Srcin1,Dclk1,Pak3,Strn,Tnik,Kif1a,Dcx,Mark1,Ppp1r9a,Numbl,Spire1,Syne1,Hdac6,Shank3,Kiaa0319,Ppfia2,Cobl,Tiam1,Ctnnd2,Camk2a,Nedd4l,Fyn,Ctnna2,Celsr2,Kalrn,Srgap2,Dnm3,Dgkg,Tanc2,Fmr1,Caprin1,Lzts3,Nsmf,Neurl1
GO:0005622	intracellular anatomical structure	0.0020788	Tbcd,Champ1,Shank2,Rprd2,Sin3a,Sugp2,Ubp1,Enc1,Mta1,Nipbl,Atf2,Hnrnpc,Lmna,Thrap3,Epc2,Znf687,Rai1,Zranb2,Sub1,Lig3,Rtf1,Rbm22,Fam169a,Baz1b,Trim28,Gtf2i,Stxbp5,Tfip11,Ddx27,Mllt10,Rnf2,Ppp3ca,Map2,Spen,Shank1,Gpkow,Htatsf1,Bclaf1,Ankrd12,Pom121,Tcf20,Nav1,Oprl1,Prkra,Wiz,Polr1b,Cfdp1,Kdm5b,Stau2,Emd,Irf2bpl,Sybu,Sugp1,Rev1,Fam8a1,Trim33,Secisbp2,Pnisr,Mllt3,Ranbp2,Setd2,Ddi2,Larp4b,Rbfox2,Ncoa6,…
GO:0031175	neuron projection development	0.0039429	Shank2,Sin3a,Enc1,Stxbp5,Ppp3ca,Map2,Shank1,Stau2,Grin3a,Rbfox2,Elavl4,Plxnc1,Kif13b,Top2b,Ank3,Myo16,Adnp,Rtn4,Zmynd8,Lmtk2,Bcl11a,Map1b,Map6,Akap5,Efnb1,Nedd4,Gprin1,Rap1gap2,Stmn2,Camk2g,Rapgef1,Magi2,Ythdf1,Creb1,Mecp2,Afdn,Map1a,Nr4a3,Farp1,Plppr4,Picalm,Map4,Dbn1,Prkd1,Mark2,Clmn,Ripor2,Tprn,Raph1,Pak6,Mef2c,Prex1,Inpp5f,Sema4b,Itsn1,Ophn1,Sipa1l1,Camk2b,Srcin1,Dclk1,Rpl24,Trim32,Rb1,Abl2,A…
GO:0051172	negative regulation of nitrogen compound metabolic process	0.00396171	Sin3a,Enc1,Mta1,Nipbl,Atf2,Hnrnpc,Thrap3,Sub1,Rtf1,Trim28,Rnf2,Ppp3ca,Spen,Bclaf1,Pphln1,Kdm5b,Irf2bpl,Secisbp2,Larp4b,Rbfox2,Elavl4,Khdrbs1,Irf2bp2,Dapk3,Ppp1r10,Acin1,Mtdh,Gatad2b,Zc3h14,Phf14,Atxn1,Ppp1r11,Ddx3x,Rtn4,Rtn3,Supt6h,Taf15,Tp53bp1,Zmynd8,Znf318,Mbd3,Rbmxl1,Hnrnpu,Lmtk2,Bcl11a,Nono,Snw1,Phc3,Chd4,Ptpn2,Kmt2a,Men1,Nedd4,Srsf6,Kdm2b,Rptor,Prdm2,Arid4a,Ctnnbip1,Rsf1,Caap1,Nsd3,Wac,Znf1…
GO:0005694	chromosome	0.00407152	Champ1,Sin3a,Enc1,Mta1,Nipbl,Atf2,Lmna,Baz1b,Trim28,Tfip11,Ddx27,Rnf2,Polr1b,Cfdp1,Mllt3,Setd2,Ddi2,Ahctf1,Dapk3,Ppp1r10,Gatad2b,Top2b,Rbbp6,Supt6h,Tp53bp1,Mbd3,Rbmxl1,Hnrnpu,Cul5,Snw1,Lrif1,Nsd1,Chd4,Men1,Pogz,Nedd4,Mdc1,Kdm2b,Mcm3ap,Rsf1,Nsd3,Hnrnpa2b1,Tnks1bp1,Nup98,Znf830,Pbrm1,Kifap3,Cbx5,Creb1,Pole,Rbmx,Clock,Mecp2,Sfr1,Tasor,Slx4,Macroh2a1,Ppp1r12a,Phf1,Dffa,Brd4,Aff4,Bicral,Cdyl,Brd8,Ncor…
GO:0030424	axon	0.00442037	Shank2,Gria4,Map2,Nav1,Stau2,Sybu,Elavl4,Kif13b,Hcn1,Zc3h14,Ank3,Adnp,Eea1,Rtn4,Dagla,Gabbr1,Exoc4,Eps8,Lmtk2,Map1b,Map6,Ap3b2,Mbp,Gprin1,Stmn2,Adra2a,Map9,Amfr,Creb1,Adgrl3,Chrm1,Myo5a,Afdn,Sncb,Map1a,Map4,Kcna3,Dbn1,Fxr1,Maco1,Mapk8ip1,Optn,Prex1,Arhgef7,Inpp5f,Itsn1,Dlg2,Erc2,Hcfc1,Ophn1,Scn2a,Pclo,Grk2,Amph,Gria1,Amigo1,Mycbp2,Klc1,Scn3a,Gabrb3,Cbl,Wdfy3,Hcn2,Rufy3,Stmn3,Bin1,Kif1a,Dcx,Mgll,S…
GO:0043229	intracellular organelle	0.00753327	Tbcd,Champ1,Shank2,Rprd2,Sin3a,Sugp2,Ubp1,Enc1,Mta1,Nipbl,Atf2,Hnrnpc,Lmna,Thrap3,Epc2,Znf687,Rai1,Zranb2,Sub1,Lig3,Rtf1,Rbm22,Fam169a,Baz1b,Trim28,Gtf2i,Stxbp5,Tfip11,Ddx27,Mllt10,Rnf2,Ppp3ca,Map2,Spen,Gpkow,Htatsf1,Bclaf1,Ankrd12,Pom121,Tcf20,Nav1,Oprl1,Prkra,Wiz,Polr1b,Cfdp1,Kdm5b,Stau2,Emd,Irf2bpl,Sybu,Sugp1,Rev1,Fam8a1,Trim33,Secisbp2,Pnisr,Mllt3,Ranbp2,Setd2,Ddi2,Larp4b,Rbfox2,Ncoa6,Borcs6,…
GO:0000380	alternative mRNA splicing, via spliceosome	0.00904955	Thrap3,Rbfox2,Khdrbs1,Rbmxl1,Hnrnpu,Srsf6,Rbmx,Cdk13,Fxr1,Srsf12,Ddx5,Rbm5,Wtap,Rbm15b,Khdrbs3,Hnrnpm,Srrm4,Rnps1,Fmr1,Rbm8a,Hnrnpl,Rbm10,Hnrnpa1
GO:0031324	negative regulation of cellular metabolic process	0.00911699	Sin3a,Enc1,Mta1,Nipbl,Atf2,Hnrnpc,Thrap3,Sub1,Lig3,Rtf1,Trim28,Rnf2,Ppp3ca,Spen,Bclaf1,Pphln1,Kdm5b,Irf2bpl,Secisbp2,Larp4b,Rbfox2,Elavl4,Khdrbs1,Irf2bp2,Dapk3,Ppp1r10,Acin1,Mtdh,Gatad2b,Zc3h14,Phf14,Atxn1,Ppp1r11,Ddx3x,Rbm26,Rtn4,Rtn3,Supt6h,Taf15,Tp53bp1,Zmynd8,Znf318,Mbd3,Rbmxl1,Hnrnpu,Lmtk2,Bcl11a,Nono,Snw1,Phc3,Chd4,Ptpn2,Kmt2a,Men1,Nedd4,Srsf6,Kdm2b,Rptor,Prdm2,Arid4a,Ctnnbip1,Rsf1,Caap1,Ns…
GO:0048666	neuron development	0.0108585	Tbcd,Shank2,Sin3a,Enc1,Stxbp5,Ppp3ca,Map2,Shank1,Stau2,Grin3a,Secisbp2,Rbfox2,Elavl4,Plxnc1,Kif13b,Hcn1,Top2b,Ank3,Myo16,Adnp,Rtn4,Zmynd8,Lmtk2,Bcl11a,Map1b,Map6,Akap5,Efnb1,Nedd4,Gprin1,Rap1gap2,Stmn2,Camk2g,Rapgef1,Magi2,Ythdf1,Creb1,Mecp2,Afdn,Map1a,Nr4a3,Farp1,Plppr4,Picalm,Map4,Dbn1,Prkd1,Mark2,Clmn,Ripor2,Tprn,Raph1,Pak6,Mef2c,Prex1,Inpp5f,Sema4b,Itsn1,Dlg2,Ophn1,Sipa1l1,Camk2b,Srcin1,Dclk1…
GO:0048699	generation of neurons	0.0136497	Tbcd,Shank2,Sin3a,Enc1,Nipbl,Stxbp5,Ppp3ca,Map2,Spen,Shank1,Nav1,Stau2,Grin3a,Secisbp2,Rbfox2,Elavl4,Irx4,Plxnc1,Kif13b,Dapk3,Hcn1,Top2b,Atxn1,Ank3,Myo16,Adnp,Rtn4,Dagla,Nexmif,Zmynd8,Lmtk2,Bcl11a,Map1b,Map6,Akap5,Efnb1,Nedd4,Gprin1,Rap1gap2,Grm5,Stmn2,Camk2g,Rapgef1,Magi2,Ythdf1,Creb1,Adgrl3,Mecp2,Afdn,Map1a,Nr4a3,Farp1,Scrt1,Plppr4,Picalm,Map4,Dbn1,Prkd1,Mark2,Clmn,Ripor2,Tprn,Raph1,Pak6,Mef2c,…
GO:0043228	non-membrane-bounded organelle	0.0181568	Tbcd,Champ1,Shank2,Sin3a,Enc1,Mta1,Nipbl,Atf2,Hnrnpc,Lmna,Sub1,Rtf1,Baz1b,Trim28,Tfip11,Ddx27,Rnf2,Ppp3ca,Map2,Nav1,Polr1b,Cfdp1,Stau2,Emd,Sybu,Mllt3,Setd2,Ddi2,Larp4b,Elavl4,Map7d1,Ahctf1,Shroom2,Ptpn12,Ncoa5,Nup153,Polr1f,Kif13b,Dapk3,Ppp1r10,Acin1,Mtdh,Gatad2b,Top2b,Zc3h14,Atxn1,Ddx3x,Ank3,Myo16,Rbbp6,Rab11fip5,Nexmif,Supt6h,Tp53bp1,Mbd3,Sympk,Clip1,Prrc2c,Rbmxl1,Hnrnpu,Trim36,Cul5,Nono,Jph1,M…
GO:0050794	regulation of cellular process	0.0186546	Tbcd,Shank2,Sin3a,Ubp1,Enc1,Mta1,Nipbl,Atf2,Hnrnpc,Lmna,Thrap3,Epc2,Rai1,Sub1,Lig3,Rtf1,Gria4,Rbm22,Trim28,Gtf2i,Stxbp5,Tfip11,Mllt10,Rnf2,Ppp3ca,Map2,Spen,Shank1,Bclaf1,Tcf20,Pphln1,Oprl1,Prkra,Wiz,Cfdp1,Kdm5b,Stau2,Emd,Irf2bpl,Sybu,Grin3a,Trim33,Secisbp2,Mllt3,Ranbp2,Setd2,Ddi2,Larp4b,Rbfox2,Ncoa6,Elavl4,Mkln1,Irx4,Ahctf1,Mga,Shroom2,Ptpn12,Ncoa5,Khdrbs1,Nup153,Plxnc1,Rab3c,Irf2bp2,Kif13b,Emsy,…
WP:WP2910	Mecp2 and Associated Rett Syndrome	0.0204671	Sin3a,Mbp,Gprin1,Ybx1,Hnrnpf,Creb1,Mecp2,Ncor1,Mef2c,Arhgef26,Nf1
GO:0010605	negative regulation of macromolecule metabolic process	0.0210454	Sin3a,Enc1,Mta1,Nipbl,Atf2,Hnrnpc,Thrap3,Sub1,Lig3,Rtf1,Trim28,Rnf2,Ppp3ca,Spen,Bclaf1,Pphln1,Prkra,Kdm5b,Irf2bpl,Secisbp2,Larp4b,Rbfox2,Elavl4,Khdrbs1,Irf2bp2,Dapk3,Ppp1r10,Acin1,Mtdh,Gatad2b,Ncbp1,Zc3h14,Phf14,Atxn1,Ppp1r11,Ddx3x,Adnp,Rtn4,Rtn3,Supt6h,Taf15,Tp53bp1,Zmynd8,Znf318,Mbd3,Rbmxl1,Hnrnpu,Lmtk2,Gspt2,Bcl11a,Nono,Snw1,Phc3,Mettl3,Chd4,Ptpn2,Kmt2a,Men1,Nedd4,Srsf6,Kdm2b,Rptor,Prdm2,Arid4…
GO:0048667	cell morphogenesis involved in neuron differentiation	0.0254745	Tbcd,Shank2,Sin3a,Stxbp5,Ppp3ca,Map2,Shank1,Stau2,Rbfox2,Elavl4,Plxnc1,Kif13b,Top2b,Ank3,Adnp,Rtn4,Lmtk2,Bcl11a,Map1b,Map6,Akap5,Efnb1,Nedd4,Ythdf1,Creb1,Afdn,Map1a,Nr4a3,Farp1,Plppr4,Picalm,Dbn1,Mark2,Ripor2,Tprn,Raph1,Mef2c,Sema4b,Ophn1,Sipa1l1,Camk2b,Srcin1,Dclk1,Rpl24,Rb1,Amigo1,Mycbp2,Pak3,Tnik,Rufy3,Kif1a,Triobp,Dcx,Mgll,Ppp1r9a,Mapt,Numbl,Syne1,Hdac6,Shank3,Kiaa0319,Ppfia2,Cobl,Ulk2,Ulk1,T…
GO:0043232	intracellular non-membrane-bounded organelle	0.0275518	Tbcd,Champ1,Shank2,Sin3a,Enc1,Mta1,Nipbl,Atf2,Hnrnpc,Lmna,Sub1,Rtf1,Baz1b,Trim28,Tfip11,Ddx27,Rnf2,Ppp3ca,Map2,Nav1,Polr1b,Cfdp1,Stau2,Emd,Sybu,Mllt3,Setd2,Ddi2,Larp4b,Elavl4,Map7d1,Ahctf1,Shroom2,Ptpn12,Ncoa5,Nup153,Polr1f,Kif13b,Dapk3,Ppp1r10,Acin1,Mtdh,Gatad2b,Top2b,Zc3h14,Atxn1,Ddx3x,Ank3,Myo16,Rbbp6,Rab11fip5,Nexmif,Supt6h,Tp53bp1,Mbd3,Sympk,Clip1,Prrc2c,Rbmxl1,Hnrnpu,Trim36,Cul5,Nono,Jph1,M…
GO:1903311	regulation of mRNA metabolic process	0.0301626	Hnrnpc,Thrap3,Secisbp2,Larp4b,Rbfox2,Elavl4,Khdrbs1,Acin1,Ncbp1,Zc3h14,Supt6h,Taf15,Rbmxl1,Hnrnpu,Snw1,Srsf6,Rbm39,Hnrnpa2b1,Nup98,Ybx1,Ythdf1,Rbmx,Nelfe,Safb,Fxr1,Son,Sltm,Srsf12,Patl1,Ddx5,Rbm5,Srsf7,Wtap,Rbm15b,Npm1,Srsf10,Khdrbs3,Pum1,Hnrnpm,Cdc73,Srrm4,Hnrnpa0,Rnps1,Ncbp2,Fmr1,Rbm8a,Hnrnpl,Rbm10,Tardbp
GO:0090304	nucleic acid metabolic process	0.0364898	Rprd2,Sin3a,Sugp2,Ubp1,Mta1,Nipbl,Atf2,Hnrnpc,Lmna,Thrap3,Epc2,Rai1,Zranb2,Sub1,Lig3,Rtf1,Rbm22,Trim28,Gtf2i,Tfip11,Ddx27,Mllt10,Rnf2,Ppp3ca,Spen,Gpkow,Htatsf1,Bclaf1,Tcf20,Pphln1,Prkra,Wiz,Polr1b,Kdm5b,Irf2bpl,Sugp1,Rev1,Secisbp2,Mllt3,Setd2,Ddi2,Larp4b,Rbfox2,Ncoa6,Zfp638,Elavl4,Irx4,Mga,Khdrbs1,Polr1f,Irf2bp2,Emsy,U2af1,Ppp1r10,Acin1,Mtdh,Pnn,Gatad2b,Top2b,Ncbp1,Zc3h14,Phf14,Atxn1,Ddx3x,Arid2,…
GO:0048813	dendrite morphogenesis	0.0405268	Shank2,Ppp3ca,Shank1,Stau2,Rbfox2,Elavl4,Map6,Akap5,Nedd4,Afdn,Farp1,Picalm,Dbn1,Sipa1l1,Camk2b,Srcin1,Dclk1,Pak3,Tnik,Kif1a,Dcx,Ppp1r9a,Numbl,Syne1,Hdac6,Shank3,Ppfia2,Tiam1,Ctnnd2,Camk2a,Nedd4l,Fyn,Ctnna2,Celsr2,Kalrn,Dnm3,Tanc2,Caprin1,Lzts3,Nsmf
GO:0030182	neuron differentiation	0.0423962	Tbcd,Shank2,Sin3a,Enc1,Stxbp5,Ppp3ca,Map2,Shank1,Stau2,Grin3a,Secisbp2,Rbfox2,Elavl4,Irx4,Plxnc1,Kif13b,Dapk3,Hcn1,Top2b,Ank3,Myo16,Adnp,Rtn4,Zmynd8,Lmtk2,Bcl11a,Map1b,Map6,Akap5,Efnb1,Nedd4,Gprin1,Rap1gap2,Stmn2,Camk2g,Rapgef1,Magi2,Ythdf1,Creb1,Mecp2,Afdn,Map1a,Nr4a3,Farp1,Plppr4,Picalm,Map4,Dbn1,Prkd1,Mark2,Clmn,Ripor2,Tprn,Raph1,Pak6,Mef2c,Prex1,Arhgef2,Inpp5f,Sema4b,Itsn1,Dlg2,Ophn1,Sipa1l1,…
GO:0022008	neurogenesis	0.0428684	Tbcd,Shank2,Sin3a,Enc1,Nipbl,Stxbp5,Ppp3ca,Map2,Spen,Shank1,Nav1,Stau2,Grin3a,Secisbp2,Rbfox2,Elavl4,Irx4,Plxnc1,Kif13b,Dapk3,Hcn1,Top2b,Atxn1,Ank3,Myo16,Adnp,Rtn4,Dagla,Nexmif,Exoc4,Zmynd8,Lmtk2,Bcl11a,Map1b,Snw1,Map6,Akap5,Efnb1,Nedd4,Gprin1,Rap1gap2,Grm5,Stmn2,Camk2g,Rapgef1,Magi2,Ythdf1,Creb1,Adgrl3,Mecp2,Afdn,Map1a,Bhlhe22,Nr4a3,Farp1,Scrt1,Plppr4,Picalm,Map4,Dbn1,Prkd1,Mark2,Clmn,Ripor2,Tpr…
GO:0051128	regulation of cellular component organization	0.0451698	Tbcd,Shank2,Sin3a,Enc1,Nipbl,Hnrnpc,Lmna,Rtf1,Trim28,Stxbp5,Tfip11,Ppp3ca,Map2,Shank1,Stau2,Mllt3,Elavl4,Mkln1,Shroom2,Plxnc1,Kif13b,Dapk3,Ppp1r10,Ncbp1,Ddx3x,Adnp,Rtn4,Cbll1,Supt6h,Zmynd8,Clip1,Hnrnpu,Eps8,Trim36,Bcl11a,Map1b,Gle1,Snw1,Map6,Akap5,Nsd1,Kmt2a,Men1,Nedd4,Rap1gap2,Kdm2b,Jmy,Stmn2,Camk2g,Rapgef1,Magi2,Rptor,Ctnnbip1,Huwe1,Nsd3,Hnrnpa2b1,Map9,G3bp2,G3bp1,Creb1,Lnpk,Adgrl3,Nelfe,Cyld,M…
GO:0016604	nuclear body	0.0471543	Champ1,Sugp2,Lmna,Thrap3,Baz1b,Tfip11,Rnf2,Bclaf1,Tcf20,Pnisr,Zfp638,Dapk3,U2af1,Ppp1r10,Acin1,Mtdh,Pnn,Gatad2b,Zc3h14,Rbbp6,Cbll1,Ddx39a,Tp53bp1,Sympk,Zc3h13,Hnrnpu,Bcl11a,Nono,Snw1,Mettl3,Srsf6,Srrm2,Rbm39,Wac,Hnrnpa2b1,Rbm27,Rfxap,Nup98,Znf830,Cbx5,Eef1akmt2,Nelfe,Afdn,Cwc25,Atf7ip,Scrt1,Cdk13,Dgkq,Cdyl,Fam76b,Aff3,Trip4,Son,Ncbp3,Sltm,Raph1,Srsf12,Mef2c,Yars,Cdc5l,Patl1,Fyttd1,Ep400,Ddx20,Srs…

## Sheet: Table S2D. BIC Cluster 4
GO.ID	Description	FDR	Genes
GO:0031981	nuclear lumen	6.29021e-29	Trip11,Hnrnpc,Rbm5,Smarcc2,Hnrnpdl,Srsf6,Smchd1,Brd7,Ccar2,Mbd3,Ilf3,Cfl1,Wdr82,Rpl6,Rbm12b2,Sub1,Dgcr8,Tra2a,Atrx,Tcf20,Dazap1,Rbm14,Nop56,Cwc25,Fmr1,Satb2,Dmap1,Lmnb1,Son,Nfx1,Ehmt2,Rsf1,Spen,Ddx5,Wtap,Matr3,Khsrp,Cpsf1,H2ax,Pelp1,Acin1,Rbm19,Hnrnpa2b1,Hnrnph2,Smc6,Sfpq,Virma,Zmynd11,Sumo3,Sptbn4,Safb,Tcerg1,Hnrnph1,Sf3a2,Mecp2,Pabpn1,Tcof1,Sp4,Lmo7,Ahctf1,Mybbp1a,Ppp1r12a,Hnrnpab,Anp32a,Hnrnpa…
GO:0005654	nucleoplasm	5.05754e-28	Trip11,Hnrnpc,Rbm5,Smarcc2,Hnrnpdl,Srsf6,Brd7,Ccar2,Mbd3,Ilf3,Wdr82,Rbm12b2,Sub1,Dgcr8,Tra2a,Atrx,Tcf20,Dazap1,Rbm14,Nop56,Cwc25,Fmr1,Satb2,Dmap1,Lmnb1,Son,Nfx1,Ehmt2,Rsf1,Spen,Ddx5,Wtap,Khsrp,Cpsf1,H2ax,Pelp1,Acin1,Rbm19,Hnrnpa2b1,Hnrnph2,Smc6,Sfpq,Virma,Zmynd11,Sumo3,Sptbn4,Safb,Tcerg1,Hnrnph1,Sf3a2,Mecp2,Pabpn1,Tcof1,Sp4,Lmo7,Ahctf1,Hnrnpab,Hnrnpa0,Sugp2,Polr1a,Gtf2i,Golga3,Srsf3,Bcl11a,Hnrnpu…
WP:WP310	mRNA processing	1.57736e-27	Hnrnpc,Rbm5,Hnrnpdl,Srsf6,Ptbp2,Ilf3,Rbm12b2,Dazap1,Rbm14,Fmr1,Son,Spen,Ddx5,Matr3,Cpsf1,Acin1,Rbm19,Hnrnpa2b1,Hnrnph2,Sfpq,Virma,Ddx19b,Hnrnph1,Sf3a2,Lsm7,Pabpn1,Hnrnpab,Hnrnpa0,Sugp2,Srsf3,Hnrnpu,Hnrnpa3,Srsf5,Pabpc4,Snrpd2,Ppp1r8,Rnps1,Bclaf1,Safb2,Zfp638,Nifk,Hnrnpl,Rbm3,Rbm22,Ncl,Rbm34,Fus,Elavl1,Nxf1,Prpf3,Rbm10,Sart3,Nop9,Elavl3,Rbm42,Prpf6,Aimp1,Rbmxl1,Alyref,Pum1,Celf5,Celf2,Hnrnpk,Dhx38…
GO:0031974	membrane-enclosed lumen	2.55042e-24	Trip11,Hnrnpc,Rbm5,Smarcc2,Hnrnpdl,Srsf6,Smchd1,Brd7,Ccar2,Mbd3,Ilf3,Cfl1,Wdr82,Rpl6,Rbm12b2,Sub1,Dgcr8,Tra2a,Atrx,Tcf20,Dazap1,Rbm14,Nop56,Cwc25,Fmr1,Satb2,Dmap1,Lmnb1,Son,Nfx1,Ehmt2,Rsf1,Spen,Ddx5,Wtap,Matr3,Khsrp,Cpsf1,H2ax,Pelp1,Acin1,Rbm19,Hnrnpa2b1,Hnrnph2,Smc6,Sfpq,Virma,Zmynd11,Sumo3,Sptbn4,Safb,Tcerg1,Hnrnph1,Sf3a2,Mecp2,Pabpn1,Tcof1,Sp4,Lmo7,Ahctf1,Mybbp1a,Ppp1r12a,Hnrnpab,Anp32a,Hnrnpa…
GO:0043233	organelle lumen	2.55042e-24	Trip11,Hnrnpc,Rbm5,Smarcc2,Hnrnpdl,Srsf6,Smchd1,Brd7,Ccar2,Mbd3,Ilf3,Cfl1,Wdr82,Rpl6,Rbm12b2,Sub1,Dgcr8,Tra2a,Atrx,Tcf20,Dazap1,Rbm14,Nop56,Cwc25,Fmr1,Satb2,Dmap1,Lmnb1,Son,Nfx1,Ehmt2,Rsf1,Spen,Ddx5,Wtap,Matr3,Khsrp,Cpsf1,H2ax,Pelp1,Acin1,Rbm19,Hnrnpa2b1,Hnrnph2,Smc6,Sfpq,Virma,Zmynd11,Sumo3,Sptbn4,Safb,Tcerg1,Hnrnph1,Sf3a2,Mecp2,Pabpn1,Tcof1,Sp4,Lmo7,Ahctf1,Mybbp1a,Ppp1r12a,Hnrnpab,Anp32a,Hnrnpa…
GO:0070013	intracellular organelle lumen	2.55042e-24	Trip11,Hnrnpc,Rbm5,Smarcc2,Hnrnpdl,Srsf6,Smchd1,Brd7,Ccar2,Mbd3,Ilf3,Cfl1,Wdr82,Rpl6,Rbm12b2,Sub1,Dgcr8,Tra2a,Atrx,Tcf20,Dazap1,Rbm14,Nop56,Cwc25,Fmr1,Satb2,Dmap1,Lmnb1,Son,Nfx1,Ehmt2,Rsf1,Spen,Ddx5,Wtap,Matr3,Khsrp,Cpsf1,H2ax,Pelp1,Acin1,Rbm19,Hnrnpa2b1,Hnrnph2,Smc6,Sfpq,Virma,Zmynd11,Sumo3,Sptbn4,Safb,Tcerg1,Hnrnph1,Sf3a2,Mecp2,Pabpn1,Tcof1,Sp4,Lmo7,Ahctf1,Mybbp1a,Ppp1r12a,Hnrnpab,Anp32a,Hnrnpa…
GO:0008380	RNA splicing	4.07064e-24	Hnrnpc,Rbm5,Srsf6,Ccar2,Ptbp2,Rbm12b2,Tra2a,Ahnak,Dazap1,Rbm14,Cwc25,Fmr1,Son,Ddx5,Wtap,Khsrp,Acin1,Rbm19,Hnrnpa2b1,Hnrnph2,Sfpq,Virma,Tcerg1,Hnrnph1,Sf3a2,Lsm7,Sugp2,Srsf3,Hnrnpu,Hnrnpa3,Srsf5,Snrpd2,Ppp1r8,Rnps1,Zfp638,Hnrnpl,Rbm3,Rbm22,Ncl,Ddx17,Thrap3,Fus,Ik,Wbp11,Prpf3,Snrnp200,Rbm10,Sart3,Sart1,Khdrbs1,Rbm42,Prpf6,Nova2,Rbmxl1,Alyref,Celf5,Celf2,Hnrnpk,Dhx38,Tfip11,Sugp1,Rbfox2,Cdc5l,Mettl3
GO:0006397	mRNA processing	9.79943e-24	Hnrnpc,Rbm5,Srsf6,Ccar2,Ptbp2,Tra2a,Dazap1,Rbm14,Cwc25,Fmr1,Son,Ddx5,Wtap,Khsrp,Cpsf1,Acin1,Rbm19,Hnrnpa2b1,Sfpq,Virma,Safb,Tcerg1,Hnrnph1,Sf3a2,Lsm7,Pabpn1,Sugp2,Srsf3,Hnrnpu,Hnrnpa3,Srsf5,Snrpd2,Ppp1r8,Zc3h14,Rnps1,Safb2,Hnrnpl,Rbm3,Rbm22,Ncl,Rbm27,Ddx17,Thrap3,Ik,Wbp11,Prpf3,Snrnp200,Rbm10,Sart3,Sart1,Khdrbs1,Rbm42,Prpf6,Nova2,Rbmxl1,Alyref,Celf5,Celf2,Hnrnpk,Ccnt1,Ncbp3,Dhx38,Tfip11,Sugp1,Rbf…
GO:0005634	nucleus	5.3327e-23	Trip11,Hnrnpc,Rbm5,Smarcc2,Hnrnpdl,Srsf6,Smchd1,Brd7,Ccar2,Adnp,Mbd3,Ptbp2,Ilf3,Dhcr7,Cfl1,Wdr82,Rpl6,Rbm12b2,Sub1,Dgcr8,Tra2a,Ahnak,Atrx,Tcf20,Dazap1,Rbm14,Nop56,Cwc25,Dst,Fmr1,Satb2,Dmap1,Lmnb1,Son,Fam169a,Nfx1,Ehmt2,Rsf1,Spen,Ddx5,Wtap,Matr3,Khsrp,Cpsf1,H2ax,Pelp1,Acin1,Rbm19,Hnrnpa2b1,Hnrnph2,Nup214,Smc6,Sfpq,Virma,Zmynd11,Sumo3,Sptbn4,Safb,Tcerg1,Ddx19b,Hnrnph1,Sf3a2,Lsm7,Mecp2,Pabpn1,Tcof1,…
GO:0016070	RNA metabolic process	1.39198e-21	Hnrnpc,Rbm5,Smarcc2,Srsf6,Smchd1,Wfs1,Brd7,Ccar2,Mbd3,Ptbp2,Ilf3,Rbm12b2,Sub1,Dgcr8,Tra2a,Ahnak,Atrx,Tcf20,Dazap1,Rbm14,Cwc25,Fmr1,Satb2,Dmap1,Son,Nfx1,Ehmt2,Rsf1,Spen,Ddx5,Wtap,Eprs1,Khsrp,Cpsf1,H2ax,Pelp1,Phf3,Acin1,Rbm19,Hnrnpa2b1,Hnrnph2,Sfpq,Virma,Zmynd11,Safb,Tcerg1,Hnrnph1,Sf3a2,Lsm7,Mecp2,Pabpn1,Tcof1,Sp4,Lmo7,Mybbp1a,Ppp1r12a,Hnrnpab,Hnrnpa0,Sugp2,Polr1a,Gtf2i,Srsf3,Bcl11a,Hnrnpu,Tpr,Tce…
GO:0006396	RNA processing	1.83247e-21	Hnrnpc,Rbm5,Srsf6,Ccar2,Ptbp2,Rbm12b2,Dgcr8,Tra2a,Ahnak,Dazap1,Rbm14,Cwc25,Fmr1,Son,Ddx5,Wtap,Khsrp,Cpsf1,Acin1,Rbm19,Hnrnpa2b1,Hnrnph2,Sfpq,Virma,Safb,Tcerg1,Hnrnph1,Sf3a2,Lsm7,Mecp2,Pabpn1,Sugp2,Srsf3,Hnrnpu,Hnrnpa3,Srsf5,Snrpd2,Ppp1r8,Zc3h14,Rnps1,Safb2,Zfp638,Nifk,Hnrnpl,Rbm3,Rbm22,Ncl,Rbm27,Ddx17,Thrap3,Fus,Ik,Wbp11,Prpf3,Snrnp200,Rbm10,Sart3,Sart1,Khdrbs1,Nop9,Rbm42,Ints6,Prpf6,Nova2,Rbmxl1…
GO:0016071	mRNA metabolic process	5.87099e-21	Hnrnpc,Rbm5,Srsf6,Ccar2,Ptbp2,Tra2a,Dazap1,Rbm14,Cwc25,Fmr1,Son,Ddx5,Wtap,Khsrp,Cpsf1,Acin1,Rbm19,Hnrnpa2b1,Sfpq,Virma,Safb,Tcerg1,Hnrnph1,Sf3a2,Lsm7,Pabpn1,Hnrnpa0,Sugp2,Srsf3,Hnrnpu,Hnrnpa3,Srsf5,Pabpc4,Snrpd2,Ppp1r8,Zc3h14,Rnps1,Safb2,Hnrnpl,Rbm3,Rbm22,Ncl,Rbm27,Ddx17,Thrap3,Fus,Elavl1,Ik,Wbp11,Prpf3,Snrnp200,Rbm10,Sart3,Sart1,Khdrbs1,Rbm42,Prpf6,Nova2,Rbmxl1,Alyref,Pum1,Celf5,Celf2,Larp1,Hnrn…
GO:0000398	mRNA splicing, via spliceosome	7.68158e-19	Hnrnpc,Rbm5,Srsf6,Ptbp2,Tra2a,Dazap1,Rbm14,Cwc25,Fmr1,Son,Ddx5,Wtap,Acin1,Rbm19,Hnrnpa2b1,Sfpq,Sf3a2,Lsm7,Srsf3,Hnrnpu,Srsf5,Snrpd2,Rnps1,Hnrnpl,Rbm3,Rbm22,Ncl,Ddx17,Thrap3,Ik,Wbp11,Prpf3,Snrnp200,Rbm10,Sart3,Sart1,Khdrbs1,Rbm42,Prpf6,Nova2,Rbmxl1,Celf5,Celf2,Hnrnpk,Dhx38,Tfip11,Rbfox2,Cdc5l,Mettl3
GO:0000377	RNA splicing, via transesterification reactions with bulged adenosine as nucleophile	7.68158e-19	Hnrnpc,Rbm5,Srsf6,Ptbp2,Tra2a,Dazap1,Rbm14,Cwc25,Fmr1,Son,Ddx5,Wtap,Acin1,Rbm19,Hnrnpa2b1,Sfpq,Sf3a2,Lsm7,Srsf3,Hnrnpu,Srsf5,Snrpd2,Rnps1,Hnrnpl,Rbm3,Rbm22,Ncl,Ddx17,Thrap3,Ik,Wbp11,Prpf3,Snrnp200,Rbm10,Sart3,Sart1,Khdrbs1,Rbm42,Prpf6,Nova2,Rbmxl1,Celf5,Celf2,Hnrnpk,Dhx38,Tfip11,Rbfox2,Cdc5l,Mettl3
GO:0000375	RNA splicing, via transesterification reactions	7.68158e-19	Hnrnpc,Rbm5,Srsf6,Ptbp2,Tra2a,Dazap1,Rbm14,Cwc25,Fmr1,Son,Ddx5,Wtap,Acin1,Rbm19,Hnrnpa2b1,Sfpq,Sf3a2,Lsm7,Srsf3,Hnrnpu,Srsf5,Snrpd2,Rnps1,Hnrnpl,Rbm3,Rbm22,Ncl,Ddx17,Thrap3,Ik,Wbp11,Prpf3,Snrnp200,Rbm10,Sart3,Sart1,Khdrbs1,Rbm42,Prpf6,Nova2,Rbmxl1,Celf5,Celf2,Hnrnpk,Dhx38,Tfip11,Rbfox2,Cdc5l,Mettl3
GO:0090304	nucleic acid metabolic process	1.2664e-18	Hnrnpc,Rbm5,Smarcc2,Srsf6,Smchd1,Wfs1,Brd7,Ccar2,Mbd3,Ptbp2,Ilf3,Rbm12b2,Sub1,Dgcr8,Tra2a,Ahnak,Atrx,Tcf20,Dazap1,Rbm14,Cwc25,Fmr1,Satb2,Dmap1,Son,Nfx1,Ehmt2,Rsf1,Spen,Ddx5,Wtap,Eprs1,Khsrp,Cpsf1,H2ax,Pelp1,Phf3,Acin1,Rbm19,Hnrnpa2b1,Hnrnph2,Smc6,Sfpq,Virma,Zmynd11,Safb,Tcerg1,Hnrnph1,Sf3a2,Lsm7,Mecp2,Pabpn1,Tcof1,Sp4,Lmo7,Mybbp1a,Ppp1r12a,Hnrnpab,Hnrnpa0,Sugp2,Polr1a,Gtf2i,Srsf3,Bcl11a,Hnrnpu,Tp…
GO:0010467	gene expression	1.32061e-17	Hnrnpc,Rbm5,Smarcc2,Srsf6,Smchd1,Wfs1,Brd7,Ccar2,Adnp,Mbd3,Ptbp2,Ilf3,Rpl6,Rbm12b2,Sub1,Dgcr8,Tra2a,Ahnak,Atrx,Tcf20,Dazap1,Rbm14,Cwc25,Fmr1,Satb2,Dmap1,Son,Nfx1,Ehmt2,Rsf1,Spen,Ddx5,Wtap,Matr3,Eprs1,Khsrp,Cpsf1,H2ax,Pelp1,Phf3,Acin1,Rbm19,Hnrnpa2b1,Hnrnph2,Nup214,Sfpq,Virma,Zmynd11,Safb,Tcerg1,Ddx19b,Hnrnph1,Sf3a2,Lsm7,Mecp2,Pabpn1,Tcof1,Sp4,Lmo7,Mybbp1a,Ppp1r12a,Hnrnpab,Hnrnpa0,Sugp2,Polr1a,Gtf…
GO:0043484	regulation of RNA splicing	7.65397e-16	Rbm5,Srsf6,Ptbp2,Rbm12b2,Ahnak,Dazap1,Fmr1,Son,Ddx5,Wtap,Acin1,Hnrnpa2b1,Hnrnph2,Hnrnph1,Srsf3,Hnrnpu,Srsf5,Rnps1,Hnrnpl,Rbm3,Rbm22,Ncl,Ddx17,Thrap3,Fus,Rbm10,Khdrbs1,Rbm42,Nova2,Rbmxl1,Celf5,Celf2,Hnrnpk,Rbfox2
GO:0006139	nucleobase-containing compound metabolic process	6.78546e-15	Hnrnpc,Rbm5,Smarcc2,Srsf6,Smchd1,Wfs1,Brd7,Ccar2,Mbd3,Ptbp2,Ilf3,Rbm12b2,Sub1,Dgcr8,Tra2a,Ahnak,Atrx,Tcf20,Dazap1,Rbm14,Cwc25,Fmr1,Satb2,Dmap1,Son,Nfx1,Ehmt2,Rsf1,Spen,Ddx5,Wtap,Eprs1,Khsrp,Cpsf1,H2ax,Pelp1,Phf3,Acin1,Rbm19,Hnrnpa2b1,Hnrnph2,Smc6,Sfpq,Virma,Zmynd11,Safb,Tcerg1,Hnrnph1,Sf3a2,Lsm7,Mecp2,Pabpn1,Tcof1,Sp4,Lmo7,Mybbp1a,Ppp1r12a,Hnrnpab,Hnrnpa0,Acsl1,Sugp2,Polr1a,Gtf2i,Srsf3,Bcl11a,Hnr…
REAC:R-MMU-72203	Processing of Capped Intron-Containing Pre-mRNA	1.05641e-14	Hnrnpc,Rbm5,Srsf6,Cwc25,Wtap,Cpsf1,Hnrnpa2b1,Hnrnph2,Nup214,Hnrnph1,Lsm7,Pabpn1,Hnrnpa0,Srsf3,Hnrnpu,Tpr,Hnrnpa3,Srsf5,Sarnp,Snrpd2,Rnps1,Nup153,Hnrnpl,Rbm22,Pom121,Fus,Elavl1,Nxf1,Wbp11,Prpf3,Snrnp200,Sart1,Prpf6,Rbmxl1,Alyref,Hnrnpk,Dhx38,Tfip11,Sugp1,Wdr33,Cdc5l
GO:0046483	heterocycle metabolic process	1.77868e-14	Hnrnpc,Rbm5,Smarcc2,Srsf6,Smchd1,Wfs1,Brd7,Ccar2,Mbd3,Ptbp2,Ilf3,Rbm12b2,Sub1,Dgcr8,Tra2a,Ahnak,Atrx,Tcf20,Dazap1,Rbm14,Cwc25,Fmr1,Satb2,Dmap1,Son,Nfx1,Ehmt2,Rsf1,Spen,Ddx5,Wtap,Eprs1,Khsrp,Cpsf1,H2ax,Pelp1,Phf3,Acin1,Rbm19,Hnrnpa2b1,Hnrnph2,Smc6,Sfpq,Virma,Zmynd11,Safb,Tcerg1,Hnrnph1,Sf3a2,Lsm7,Mecp2,Pabpn1,Tcof1,Sp4,Lmo7,Mybbp1a,Ppp1r12a,Hnrnpab,Hnrnpa0,Acsl1,Sugp2,Polr1a,Gtf2i,Srsf3,Spr,Bcl11a…
GO:0006725	cellular aromatic compound metabolic process	4.97349e-14	Hnrnpc,Rbm5,Smarcc2,Srsf6,Smchd1,Wfs1,Brd7,Ccar2,Mbd3,Ptbp2,Ilf3,Rbm12b2,Sub1,Dgcr8,Tra2a,Ahnak,Atrx,Tcf20,Dazap1,Rbm14,Cwc25,Fmr1,Satb2,Dmap1,Son,Nfx1,Ehmt2,Rsf1,Spen,Ddx5,Wtap,Eprs1,Khsrp,Cpsf1,H2ax,Pelp1,Phf3,Acin1,Rbm19,Hnrnpa2b1,Hnrnph2,Smc6,Sfpq,Virma,Zmynd11,Safb,Tcerg1,Hnrnph1,Sf3a2,Lsm7,Mecp2,Pabpn1,Tcof1,Sp4,Lmo7,Mybbp1a,Ppp1r12a,Hnrnpab,Hnrnpa0,Acsl1,Sugp2,Polr1a,Gtf2i,Srsf3,Spr,Bcl11a…
GO:1901360	organic cyclic compound metabolic process	6.7257e-14	Hnrnpc,Rbm5,Smarcc2,Srsf6,Smchd1,Wfs1,Brd7,Ccar2,Mbd3,Ptbp2,Ilf3,Dhcr7,Rbm12b2,Sub1,Dgcr8,Tra2a,Ahnak,Atrx,Tcf20,Dazap1,Rbm14,Cwc25,Fmr1,Satb2,Dmap1,Son,Nfx1,Ehmt2,Rsf1,Spen,Ddx5,Wtap,Eprs1,Khsrp,Cpsf1,H2ax,Pelp1,Phf3,Acin1,Rbm19,Hnrnpa2b1,Hnrnph2,Smc6,Sfpq,Virma,Zmynd11,Safb,Tcerg1,Hnrnph1,Sf3a2,Lsm7,Mecp2,Pabpn1,Tcof1,Sp4,Lmo7,Mybbp1a,Ppp1r12a,Hnrnpab,Hnrnpa0,Acsl1,Sugp2,Polr1a,Gtf2i,Srsf3,Spr,…
GO:0050684	regulation of mRNA processing	6.21635e-13	Rbm5,Srsf6,Dazap1,Fmr1,Son,Ddx5,Wtap,Acin1,Hnrnpa2b1,Virma,Safb,Srsf3,Hnrnpu,Zc3h14,Rnps1,Safb2,Hnrnpl,Rbm3,Ncl,Ddx17,Thrap3,Rbm10,Khdrbs1,Rbm42,Nova2,Rbmxl1,Celf5,Celf2,Hnrnpk,Ccnt1,Rbfox2
REAC:R-MMU-72163	mRNA Splicing - Major Pathway	9.01083e-13	Hnrnpc,Rbm5,Srsf6,Cwc25,Cpsf1,Hnrnpa2b1,Hnrnph2,Hnrnph1,Lsm7,Pabpn1,Hnrnpa0,Srsf3,Hnrnpu,Hnrnpa3,Srsf5,Snrpd2,Rnps1,Hnrnpl,Rbm22,Fus,Elavl1,Wbp11,Prpf3,Snrnp200,Sart1,Prpf6,Rbmxl1,Alyref,Hnrnpk,Dhx38,Tfip11,Sugp1,Wdr33,Cdc5l
GO:0034641	cellular nitrogen compound metabolic process	1.54841e-12	Hnrnpc,Rbm5,Smarcc2,Srsf6,Smchd1,Wfs1,Brd7,Ccar2,Mbd3,Ptbp2,Ilf3,Rpl6,Rbm12b2,Sub1,Dgcr8,Tra2a,Ahnak,Atrx,Tcf20,Dazap1,Rbm14,Cwc25,Fmr1,Satb2,Dmap1,Son,Nfx1,Ehmt2,Rsf1,Spen,Ddx5,Wtap,Eprs1,Khsrp,Cpsf1,H2ax,Pelp1,Phf3,Acin1,Rbm19,Hnrnpa2b1,Hnrnph2,Smc6,Sfpq,Virma,Zmynd11,Safb,Tcerg1,Hnrnph1,Sf3a2,Lsm7,Mecp2,Pabpn1,Tcof1,Sp4,Slc2a13,Lmo7,Mybbp1a,Ppp1r12a,Hnrnpab,Hnrnpa0,Acsl1,Sugp2,Polr1a,Gtf2i,Srs…
GO:0048024	regulation of mRNA splicing, via spliceosome	1.5557e-12	Rbm5,Srsf6,Dazap1,Fmr1,Son,Ddx5,Wtap,Acin1,Hnrnpa2b1,Srsf3,Hnrnpu,Rnps1,Hnrnpl,Rbm3,Ncl,Ddx17,Thrap3,Rbm10,Khdrbs1,Rbm42,Nova2,Rbmxl1,Celf5,Celf2,Hnrnpk,Rbfox2
REAC:R-MMU-72172	mRNA Splicing	1.5708e-12	Hnrnpc,Rbm5,Srsf6,Cwc25,Cpsf1,Hnrnpa2b1,Hnrnph2,Hnrnph1,Lsm7,Pabpn1,Hnrnpa0,Srsf3,Hnrnpu,Hnrnpa3,Srsf5,Snrpd2,Rnps1,Hnrnpl,Rbm22,Fus,Elavl1,Wbp11,Prpf3,Snrnp200,Sart1,Prpf6,Rbmxl1,Alyref,Hnrnpk,Dhx38,Tfip11,Sugp1,Wdr33,Cdc5l
GO:0051252	regulation of RNA metabolic process	2.30956e-12	Hnrnpc,Rbm5,Smarcc2,Srsf6,Smchd1,Wfs1,Brd7,Ccar2,Mbd3,Ptbp2,Ilf3,Rbm12b2,Sub1,Ahnak,Atrx,Tcf20,Dazap1,Rbm14,Fmr1,Satb2,Dmap1,Son,Nfx1,Ehmt2,Rsf1,Spen,Ddx5,Wtap,Khsrp,H2ax,Pelp1,Acin1,Hnrnpa2b1,Hnrnph2,Sfpq,Virma,Zmynd11,Safb,Tcerg1,Hnrnph1,Mecp2,Sp4,Lmo7,Mybbp1a,Ppp1r12a,Hnrnpab,Hnrnpa0,Gtf2i,Srsf3,Bcl11a,Hnrnpu,Tpr,Tcea1,Srsf5,Pabpc4,Sarnp,Phc3,Myt1l,Med15,Zc3h14,Rnps1,Bclaf1,Riox1,2700081O15Rik…
GO:1903311	regulation of mRNA metabolic process	3.71907e-12	Hnrnpc,Rbm5,Srsf6,Dazap1,Fmr1,Son,Ddx5,Wtap,Khsrp,Acin1,Hnrnpa2b1,Virma,Safb,Hnrnpa0,Srsf3,Hnrnpu,Pabpc4,Zc3h14,Rnps1,Safb2,Hnrnpl,Rbm3,Ncl,Ddx17,Thrap3,Fus,Elavl1,Rbm10,Khdrbs1,Rbm42,Nova2,Rbmxl1,Pum1,Celf5,Celf2,Larp1,Hnrnpk,Ccnt1,Mtor,Rbfox2
GO:1990904	ribonucleoprotein complex	7.71478e-12	Hnrnpc,Rbm5,Ptbp2,Ilf3,Rpl6,Rbm12b2,Dazap1,Nop56,Cwc25,Fmr1,Ddx5,Eprs1,Hnrnpa2b1,Hnrnph2,Hnrnph1,Sf3a2,Lsm7,Pabpn1,Hnrnpab,Hnrnpu,Hnrnpa3,Pabpc4,Snrpd2,Ppp1r8,Zc3h14,Hnrnpl,Rbm3,Cbx5,Rbm22,Ncl,Ddx17,Fus,Elavl1,Ik,Wbp11,Prpf3,Snrnp200,Sart3,Sart1,Nop9,Nolc1,Elavl3,Rbm42,Top2b,Nufip2,Prpf6,Rbmxl1,Larp4,Alyref,Hdlbp,Celf5,Celf2,Larp1,Hnrnpk,Ftsj3,Eif3a,Nol6,Dhx38,Tfip11,Sugp1,Cdc5l
GO:0043231	intracellular membrane-bounded organelle	1.37139e-10	Trip11,Hnrnpc,Rbm5,Smarcc2,Hnrnpdl,Srsf6,Smchd1,Wfs1,Brd7,Ccar2,Adnp,Mbd3,Ptbp2,Ilf3,Tmem87a,Dhcr7,Cfl1,Stk25,Wdr82,Rpl6,Rbm12b2,Sub1,Dgcr8,Tra2a,Ahnak,Srpra,Atrx,Tcf20,Dazap1,Rbm14,Nop56,Chrm3,Cwc25,Dst,Fmr1,Satb2,Dmap1,Lmnb1,Son,Fam169a,Mia3,Nfx1,Ehmt2,Rsf1,Spen,Ddx5,Wtap,Matr3,Khsrp,Cpsf1,H2ax,Pelp1,Acin1,Rbm19,Hnrnpa2b1,Hnrnph2,Nup214,Smc6,Sfpq,Virma,Zmynd11,Sumo3,Sptbn4,Hspa4,Safb,Tcerg1,Ddx…
GO:0051253	negative regulation of RNA metabolic process	1.70487e-10	Hnrnpc,Smarcc2,Srsf6,Smchd1,Wfs1,Brd7,Ccar2,Mbd3,Ptbp2,Ilf3,Atrx,Fmr1,Satb2,Dmap1,Nfx1,Ehmt2,Rsf1,Spen,Ddx5,H2ax,Acin1,Hnrnpa2b1,Sfpq,Zmynd11,Tcerg1,Mecp2,Mybbp1a,Hnrnpab,Hnrnpa0,Bcl11a,Hnrnpu,Tpr,Sarnp,Phc3,Myt1l,Zc3h14,Rnps1,Bclaf1,Riox1,2700081O15Rik,Hnrnpl,Nsd2,Bptf,Mphosph8,Cbx5,Thrap3,Fus,Elavl1,Deaf1,Rbm10,Phf14,Sin3a,Smarca4,Phf2,Khdrbs1,Daxx,Rbm42,Macroh2a2,Rbmxl1,Strn3,Kdm5b,Dab2ip,Arid…
GO:0016604	nuclear body	2.26707e-10	Trip11,Srsf6,Dgcr8,Atrx,Tcf20,Rbm14,Cwc25,Son,Ehmt2,Wtap,H2ax,Acin1,Rbm19,Hnrnpa2b1,Smc6,Sfpq,Virma,Sumo3,Sptbn4,Sf3a2,Pabpn1,Sugp2,Srsf3,Bcl11a,Hnrnpu,Srsf5,Sarnp,Ppp1r8,Zc3h14,Rnps1,Bclaf1,Safb2,Zfp638,Cbx5,Zmym2,Rbm27,Ddx17,Thrap3,Nxf1,Ik,Wbp11,Prpf3,Rbm10,Sart3,Sart1,Lmna,Champ1,Daxx,Nolc1,Nufip2,Vps72,Aff3,Prpf6,Alyref,Fam193b,Chd3,Obscn,Ncbp3,Mtor,Tfip11,Ylpm1,Tp53bp1,Cdc5l,Mettl3,Terf2ip
GO:0019219	regulation of nucleobase-containing compound metabolic process	3.0088e-10	Hnrnpc,Rbm5,Smarcc2,Srsf6,Smchd1,Wfs1,Brd7,Ccar2,Mbd3,Ptbp2,Ilf3,Rbm12b2,Sub1,Ahnak,Atrx,Tcf20,Dazap1,Rbm14,Fmr1,Satb2,Dmap1,Son,Nfx1,Ehmt2,Rsf1,Spen,Ddx5,Wtap,Khsrp,H2ax,Pelp1,Acin1,Hnrnpa2b1,Hnrnph2,Sfpq,Virma,Zmynd11,Safb,Tcerg1,Hnrnph1,Mecp2,Sp4,Lmo7,Mybbp1a,Ppp1r12a,Hnrnpab,Hnrnpa0,Gtf2i,Srsf3,Bcl11a,Hnrnpu,Tpr,Tcea1,Srsf5,Pabpc4,Sarnp,Phc3,Myt1l,Med15,Zc3h14,Rnps1,Bclaf1,Riox1,2700081O15Rik…
GO:0045934	negative regulation of nucleobase-containing compound metabolic process	4.8882e-10	Hnrnpc,Smarcc2,Srsf6,Smchd1,Wfs1,Brd7,Ccar2,Mbd3,Ptbp2,Ilf3,Sub1,Atrx,Fmr1,Satb2,Dmap1,Nfx1,Ehmt2,Rsf1,Spen,Ddx5,H2ax,Acin1,Hnrnpa2b1,Sfpq,Zmynd11,Tcerg1,Mecp2,Mybbp1a,Hnrnpab,Hnrnpa0,Bcl11a,Hnrnpu,Tpr,Sarnp,Phc3,Myt1l,Zc3h14,Rnps1,Bclaf1,Riox1,2700081O15Rik,Hnrnpl,Nsd2,Bptf,Mphosph8,Cbx5,Thrap3,Fus,Elavl1,Deaf1,Rbm10,Phf14,Sin3a,Smarca4,Phf2,Khdrbs1,Daxx,Rbm42,Macroh2a2,Rbmxl1,Strn3,Kdm5b,Dab2ip…
GO:0140513	nuclear protein-containing complex	7.11942e-10	Hnrnpc,Rbm5,Smarcc2,Adnp,Mbd3,Ptbp2,Wdr82,Dgcr8,Cwc25,Satb2,Dmap1,Rsf1,Ddx5,Cpsf1,Pelp1,Acin1,Hnrnpa2b1,Nup214,Sfpq,Hnrnph1,Sf3a2,Lsm7,Ahctf1,Hnrnpab,Polr1a,Hnrnpu,Tpr,Tcea1,Hnrnpa3,Sarnp,Snrpd2,Ppp1r8,Phc3,Med15,Nup153,Bclaf1,Rbm3,Bptf,Cbx5,Rbm22,Ncl,Thrap3,Pom121,Nxf1,Ik,Wbp11,Prpf3,Deaf1,Snrnp200,Sart3,Sart1,Phf14,Sin3a,Smarca4,Nolc1,Ints6,Aff3,Prpf6,Smarcc1,Rbmxl1,Supt20,Alyref,Arid1a,Hnrnpk,…
GO:0043227	membrane-bounded organelle	5.86483e-09	Trip11,Hnrnpc,Rbm5,Smarcc2,Hnrnpdl,Srsf6,Smchd1,Wfs1,Brd7,Ccar2,Adnp,Mbd3,Ptbp2,Ilf3,Tmem87a,Dhcr7,Cfl1,Stk25,Wdr82,Rpl6,Rbm12b2,Sub1,Dgcr8,Tra2a,Ahnak,Srpra,Atrx,Tcf20,Dazap1,Rbm14,Nop56,Chrm3,Cwc25,Dst,Fmr1,Satb2,Dmap1,Lmnb1,Son,Fam169a,Mia3,Nfx1,Ehmt2,Rsf1,Spen,Ddx5,Wtap,Matr3,Khsrp,Cpsf1,H2ax,Pelp1,Acin1,Rbm19,Hnrnpa2b1,Hnrnph2,Nup214,Smc6,Sfpq,Virma,Zmynd11,Sumo3,Sptbn4,Hspa4,Safb,Tcerg1,Ddx…
GO:0016607	nuclear speck	1.11315e-08	Trip11,Srsf6,Rbm14,Cwc25,Son,Ehmt2,Wtap,H2ax,Acin1,Rbm19,Smc6,Sfpq,Virma,Sf3a2,Pabpn1,Srsf3,Hnrnpu,Srsf5,Sarnp,Ppp1r8,Zc3h14,Rnps1,Bclaf1,Zfp638,Rbm27,Ddx17,Thrap3,Nxf1,Ik,Wbp11,Prpf3,Rbm10,Sart3,Sart1,Lmna,Vps72,Prpf6,Alyref,Fam193b,Ncbp3,Tfip11,Ylpm1,Cdc5l,Mettl3
GO:0010468	regulation of gene expression	1.30097e-08	Hnrnpc,Rbm5,Smarcc2,Srsf6,Smchd1,Wfs1,Brd7,Ccar2,Adnp,Mbd3,Ptbp2,Ilf3,Rbm12b2,Sub1,Dgcr8,Ahnak,Atrx,Tcf20,Dazap1,Rbm14,Fmr1,Satb2,Dmap1,Son,Nfx1,Ehmt2,Rsf1,Spen,Ddx5,Wtap,Matr3,Eprs1,Khsrp,H2ax,Pelp1,Acin1,Hnrnpa2b1,Hnrnph2,Sfpq,Zmynd11,Safb,Tcerg1,Hnrnph1,Lsm7,Mecp2,Tcof1,Sp4,Lmo7,Mybbp1a,Ppp1r12a,Hnrnpab,Hnrnpa0,Gtf2i,Srsf3,Bcl11a,Hnrnpu,Tpr,Tcea1,Ndrg2,Srsf5,Pabpc4,Sarnp,Phc3,Myt1l,Med15,Zc3h1…
GO:0043229	intracellular organelle	2.62824e-08	Trip11,Hnrnpc,Rbm5,Smarcc2,Hnrnpdl,Srsf6,Smchd1,Wfs1,Brd7,Ccar2,Adnp,Mbd3,Ptbp2,Ilf3,Tmem87a,Dhcr7,Cfl1,Stk25,Wdr82,Rpl6,Rbm12b2,Sub1,Dgcr8,Tra2a,Ahnak,Srpra,Atrx,Tcf20,Dazap1,Rbm14,Nop56,Chrm3,Cwc25,Dst,Sptb,Fmr1,Satb2,Dmap1,Lmnb1,Son,Fam169a,Macf1,Mia3,Nfx1,Ehmt2,Rtkn,Rsf1,Spen,Ddx5,Wtap,Matr3,Khsrp,Rabgap1,Cpsf1,H2ax,Pelp1,Acin1,Rbm19,Hnrnpa2b1,Hnrnph2,Nup214,Smc6,Sfpq,Virma,Zmynd11,Sumo3,Sptb…
KEGG:03040	Spliceosome	2.79252e-08	Hnrnpc,Srsf6,Tra2a,Ddx5,Acin1,Tcerg1,Sf3a2,Lsm7,Srsf3,Hnrnpu,Hnrnpa3,Srsf5,Snrpd2,Rbm22,Fus,Wbp11,Prpf3,Snrnp200,Sart1,Prpf6,Rbmxl1,Alyref,Hnrnpk,Dhx38,Cdc5l
GO:0000381	regulation of alternative mRNA splicing, via spliceosome	3.19352e-08	Rbm5,Srsf6,Fmr1,Ddx5,Wtap,Hnrnpu,Rnps1,Hnrnpl,Ddx17,Thrap3,Rbm10,Khdrbs1,Nova2,Rbmxl1,Celf5,Celf2,Rbfox2
GO:0005681	spliceosomal complex	6.39043e-08	Hnrnpc,Rbm5,Ptbp2,Cwc25,Ddx5,Hnrnpa2b1,Hnrnph1,Sf3a2,Lsm7,Hnrnpu,Hnrnpa3,Snrpd2,Ppp1r8,Rbm3,Rbm22,Ncl,Ik,Wbp11,Prpf3,Snrnp200,Sart1,Prpf6,Rbmxl1,Alyref,Hnrnpk,Dhx38,Tfip11,Sugp1,Cdc5l
REAC:R-MMU-8953854	Metabolism of RNA	8.57053e-08	Hnrnpc,Rbm5,Srsf6,Rpl6,Nop56,Cwc25,Wtap,Khsrp,Cpsf1,Pelp1,Hnrnpa2b1,Hnrnph2,Nup214,Hnrnph1,Lsm7,Pabpn1,Anp32a,Hnrnpa0,Srsf3,Hnrnpu,Tpr,Hnrnpa3,Srsf5,Sarnp,Snrpd2,Rnps1,Nup153,Hnrnpl,Rbm22,Ncl,Pom121,Fus,Elavl1,Nxf1,Wbp11,Prpf3,Snrnp200,Sart1,Prpf6,Rbmxl1,Alyref,Hnrnpk,Ftsj3,Nol6,Dhx38,Tfip11,Sugp1,Psme1,Wdr33,Cdc5l
GO:0005694	chromosome	2.21793e-07	Smarcc2,Smchd1,Ccar2,Mbd3,Wdr82,Atrx,Fmr1,Satb2,Dmap1,Ehmt2,Rsf1,H2ax,Pelp1,Rbm19,Hnrnpa2b1,Smc6,Sfpq,Zmynd11,Mecp2,Ahctf1,Ppp1r12a,Polr1a,Hnrnpu,Tpr,Uhrf2,Myt1l,Nifk,Nsd2,Bptf,Mphosph8,Cbx5,Ncl,Rbm34,Ik,Lrif1,Hmgn1,Ckap5,Lmna,Sin3a,Pogz,Smarca4,Phf2,Champ1,Daxx,Top2b,Macroh2a2,Setd2,Smarcc1,Rbmxl1,Apc,Hmgn3,Chmp7,Kdm4b,Arid1a,Hnrnpk,Chd3,Ftsj3,Nol6,Polb,Tfip11,Hdac1,Cenpv,Pbrm1,Tp53bp1,Cdc5l,Dnt…
GO:1903312	negative regulation of mRNA metabolic process	2.32905e-07	Hnrnpc,Srsf6,Fmr1,Acin1,Hnrnpa2b1,Hnrnpa0,Hnrnpu,Zc3h14,Rnps1,Hnrnpl,Thrap3,Fus,Elavl1,Rbm10,Rbm42,Rbmxl1,Larp1,Hnrnpk,Ccnt1,Mtor
GO:0043226	organelle	2.52528e-07	Trip11,Hnrnpc,Rbm5,Smarcc2,Hnrnpdl,Srsf6,Smchd1,Wfs1,Brd7,Ccar2,Adnp,Mbd3,Ptbp2,Ilf3,Tmem87a,Dhcr7,Cfl1,Stk25,Wdr82,Rpl6,Rbm12b2,Sub1,Dgcr8,Tra2a,Ahnak,Srpra,Atrx,Tcf20,Dazap1,Rbm14,Nop56,Chrm3,Cwc25,Dst,Sptb,Fmr1,Satb2,Dmap1,Lmnb1,Son,Fam169a,Macf1,Mia3,Nfx1,Ehmt2,Rtkn,Rsf1,Spen,Ddx5,Wtap,Matr3,Khsrp,Rabgap1,Cpsf1,H2ax,Pelp1,Acin1,Rbm19,Hnrnpa2b1,Hnrnph2,Nup214,Smc6,Sfpq,Virma,Zmynd11,Sumo3,Sptb…
GO:0000380	alternative mRNA splicing, via spliceosome	1.50274e-06	Rbm5,Srsf6,Fmr1,Ddx5,Wtap,Sfpq,Hnrnpu,Rnps1,Hnrnpl,Ddx17,Thrap3,Rbm10,Khdrbs1,Nova2,Rbmxl1,Celf5,Celf2,Rbfox2
GO:0071013	catalytic step 2 spliceosome	3.00966e-06	Hnrnpc,Ddx5,Hnrnpa2b1,Hnrnph1,Sf3a2,Lsm7,Hnrnpu,Hnrnpa3,Snrpd2,Rbm22,Snrnp200,Sart1,Prpf6,Rbmxl1,Hnrnpk,Dhx38,Tfip11,Cdc5l
GO:0006338	chromatin remodeling	3.30546e-06	Smarcc2,Smchd1,Mbd3,Atrx,Satb2,Dmap1,Rsf1,Tpr,Riox1,Bptf,Mphosph8,Smarca4,Phf2,Daxx,Vps72,Smarcc1,Kdm5b,Kdm4b,Arid1a,Chd3,Hdac1,Cenpv,Pbrm1
WP:000000	WIKIPATHWAYS	1.72713e-05	Hnrnpc,Rbm5,Smarcc2,Hnrnpdl,Srsf6,Brd7,Ccar2,Mbd3,Ptbp2,Ilf3,Dhcr7,Cfl1,Rpl6,Rbm12b2,Atrx,Tcf20,Dazap1,Rbm14,Chrm3,Dst,Fmr1,Satb2,Lmnb1,Son,Ehmt2,Rtkn,Spen,Ddx5,Matr3,Eprs1,Cpsf1,H2ax,Acin1,Rbm19,Hnrnpa2b1,Hnrnph2,Sfpq,Virma,Sumo3,Ddx19b,Hnrnph1,Sf3a2,Lsm7,Mecp2,Fkbp15,Pabpn1,Grin2b,Ppp1r12a,Hnrnpab,Hnrnpa0,Acsl1,Sugp2,Polr1a,Gtf2i,Srsf3,Ktn1,Hnrnpu,Hnrnpa3,Srsf5,Pabpc4,Snrpd2,Ppp1r8,Med15,Rnps1,…
GO:0006351	transcription, DNA-templated	6.86923e-05	Smarcc2,Smchd1,Wfs1,Brd7,Ccar2,Mbd3,Ilf3,Sub1,Atrx,Tcf20,Rbm14,Satb2,Dmap1,Nfx1,Ehmt2,Rsf1,Spen,Ddx5,Khsrp,H2ax,Pelp1,Phf3,Hnrnpa2b1,Sfpq,Zmynd11,Safb,Tcerg1,Mecp2,Tcof1,Sp4,Lmo7,Mybbp1a,Ppp1r12a,Hnrnpab,Polr1a,Gtf2i,Bcl11a,Hnrnpu,Tpr,Tcea1,Gtf3c3,Sarnp,Phc3,Myt1l,Med15,Bclaf1,Riox1,2700081O15Rik,Safb2,Nsd2,Bptf,Mphosph8,Cbx5,Znf280c,Ncl,Ddx17,Thrap3,Fus,Lrif1,Hmgn1,Tef,Deaf1,Rbm10,Phf14,Sin3a,Po…
GO:0097659	nucleic acid-templated transcription	7.18611e-05	Smarcc2,Smchd1,Wfs1,Brd7,Ccar2,Mbd3,Ilf3,Sub1,Atrx,Tcf20,Rbm14,Satb2,Dmap1,Nfx1,Ehmt2,Rsf1,Spen,Ddx5,Khsrp,H2ax,Pelp1,Phf3,Hnrnpa2b1,Sfpq,Zmynd11,Safb,Tcerg1,Mecp2,Tcof1,Sp4,Lmo7,Mybbp1a,Ppp1r12a,Hnrnpab,Polr1a,Gtf2i,Bcl11a,Hnrnpu,Tpr,Tcea1,Gtf3c3,Sarnp,Phc3,Myt1l,Med15,Bclaf1,Riox1,2700081O15Rik,Safb2,Nsd2,Bptf,Mphosph8,Cbx5,Znf280c,Ncl,Ddx17,Thrap3,Fus,Lrif1,Hmgn1,Tef,Deaf1,Rbm10,Phf14,Sin3a,Po…
GO:0051171	regulation of nitrogen compound metabolic process	7.58557e-05	Hnrnpc,Rbm5,Smarcc2,Srsf6,Smchd1,Wfs1,Brd7,Ccar2,Adnp,Mbd3,Ptbp2,Ilf3,Cfl1,Rbm12b2,Sub1,Ahnak,Atrx,Tcf20,Dazap1,Rbm14,Fmr1,Satb2,Dmap1,Son,Nfx1,Ehmt2,Rsf1,Spen,Ddx5,Wtap,Eprs1,Khsrp,H2ax,Pelp1,Acin1,Hnrnpa2b1,Hnrnph2,Sfpq,Virma,Zmynd11,Sumo3,Sptbn4,Safb,Tcerg1,Hnrnph1,Mecp2,Tcof1,Sp4,Slc2a13,Lmo7,Ankle2,Mybbp1a,Ppp1r12a,Hnrnpab,Hnrnpa0,Acsl1,Gtf2i,Srsf3,Bcl11a,Hnrnpu,Tpr,Tcea1,Srsf5,Pabpc4,Sarnp,…
GO:0032774	RNA biosynthetic process	9.83378e-05	Smarcc2,Smchd1,Wfs1,Brd7,Ccar2,Mbd3,Ilf3,Sub1,Atrx,Tcf20,Rbm14,Satb2,Dmap1,Nfx1,Ehmt2,Rsf1,Spen,Ddx5,Khsrp,H2ax,Pelp1,Phf3,Hnrnpa2b1,Sfpq,Zmynd11,Safb,Tcerg1,Mecp2,Tcof1,Sp4,Lmo7,Mybbp1a,Ppp1r12a,Hnrnpab,Polr1a,Gtf2i,Bcl11a,Hnrnpu,Tpr,Tcea1,Gtf3c3,Sarnp,Phc3,Myt1l,Med15,Bclaf1,Riox1,2700081O15Rik,Safb2,Nsd2,Bptf,Mphosph8,Cbx5,Znf280c,Ncl,Ddx17,Thrap3,Fus,Lrif1,Hmgn1,Tef,Deaf1,Rbm10,Phf14,Sin3a,Po…
GO:0010605	negative regulation of macromolecule metabolic process	0.000106675	Hnrnpc,Smarcc2,Srsf6,Smchd1,Wfs1,Brd7,Ccar2,Adnp,Mbd3,Ptbp2,Ilf3,Sub1,Dgcr8,Atrx,Fmr1,Satb2,Dmap1,Nfx1,Ehmt2,Rsf1,Spen,Ddx5,Eprs1,Khsrp,H2ax,Acin1,Hnrnpa2b1,Sfpq,Zmynd11,Tcerg1,Lsm7,Mecp2,Mybbp1a,Hnrnpab,Hnrnpa0,Bcl11a,Hnrnpu,Tpr,Ndrg2,Pabpc4,Sarnp,Ppp1r8,Phc3,Myt1l,Zc3h14,Rnps1,Bclaf1,Riox1,2700081O15Rik,Hnrnpl,Nsd2,Rbm3,Bptf,Mphosph8,Cbx5,Ncl,Ddx17,Thrap3,Fus,Elavl1,Deaf1,Rbm10,Phf14,Sin3a,Smar…
GO:0006355	regulation of transcription, DNA-templated	0.000115582	Smarcc2,Smchd1,Wfs1,Brd7,Ccar2,Mbd3,Ilf3,Sub1,Atrx,Tcf20,Rbm14,Satb2,Dmap1,Nfx1,Ehmt2,Rsf1,Spen,Ddx5,Khsrp,H2ax,Pelp1,Hnrnpa2b1,Sfpq,Zmynd11,Safb,Tcerg1,Mecp2,Sp4,Lmo7,Mybbp1a,Ppp1r12a,Hnrnpab,Gtf2i,Bcl11a,Hnrnpu,Tpr,Tcea1,Sarnp,Phc3,Myt1l,Med15,Bclaf1,Riox1,2700081O15Rik,Safb2,Nsd2,Bptf,Mphosph8,Cbx5,Znf280c,Ncl,Ddx17,Thrap3,Fus,Lrif1,Hmgn1,Tef,Deaf1,Rbm10,Phf14,Sin3a,Pogz,Smarca4,Phf2,Khdrbs1,D…
GO:0051172	negative regulation of nitrogen compound metabolic process	0.000118996	Hnrnpc,Smarcc2,Srsf6,Smchd1,Wfs1,Brd7,Ccar2,Mbd3,Ptbp2,Ilf3,Sub1,Atrx,Fmr1,Satb2,Dmap1,Nfx1,Ehmt2,Rsf1,Spen,Ddx5,Eprs1,Khsrp,H2ax,Acin1,Hnrnpa2b1,Sfpq,Zmynd11,Tcerg1,Mecp2,Mybbp1a,Hnrnpab,Hnrnpa0,Bcl11a,Hnrnpu,Tpr,Sarnp,Ppp1r8,Phc3,Myt1l,Zc3h14,Rnps1,Bclaf1,Riox1,2700081O15Rik,Hnrnpl,Nsd2,Bptf,Mphosph8,Cbx5,Ncl,Thrap3,Fus,Elavl1,Deaf1,Rbm10,Phf14,Sin3a,Smarca4,Phf2,Khdrbs1,Daxx,Rbm42,Macroh2a2,Se…
GO:1903506	regulation of nucleic acid-templated transcription	0.000120939	Smarcc2,Smchd1,Wfs1,Brd7,Ccar2,Mbd3,Ilf3,Sub1,Atrx,Tcf20,Rbm14,Satb2,Dmap1,Nfx1,Ehmt2,Rsf1,Spen,Ddx5,Khsrp,H2ax,Pelp1,Hnrnpa2b1,Sfpq,Zmynd11,Safb,Tcerg1,Mecp2,Sp4,Lmo7,Mybbp1a,Ppp1r12a,Hnrnpab,Gtf2i,Bcl11a,Hnrnpu,Tpr,Tcea1,Sarnp,Phc3,Myt1l,Med15,Bclaf1,Riox1,2700081O15Rik,Safb2,Nsd2,Bptf,Mphosph8,Cbx5,Znf280c,Ncl,Ddx17,Thrap3,Fus,Lrif1,Hmgn1,Tef,Deaf1,Rbm10,Phf14,Sin3a,Pogz,Smarca4,Phf2,Khdrbs1,D…
GO:2001141	regulation of RNA biosynthetic process	0.00013238	Smarcc2,Smchd1,Wfs1,Brd7,Ccar2,Mbd3,Ilf3,Sub1,Atrx,Tcf20,Rbm14,Satb2,Dmap1,Nfx1,Ehmt2,Rsf1,Spen,Ddx5,Khsrp,H2ax,Pelp1,Hnrnpa2b1,Sfpq,Zmynd11,Safb,Tcerg1,Mecp2,Sp4,Lmo7,Mybbp1a,Ppp1r12a,Hnrnpab,Gtf2i,Bcl11a,Hnrnpu,Tpr,Tcea1,Sarnp,Phc3,Myt1l,Med15,Bclaf1,Riox1,2700081O15Rik,Safb2,Nsd2,Bptf,Mphosph8,Cbx5,Znf280c,Ncl,Ddx17,Thrap3,Fus,Lrif1,Hmgn1,Tef,Deaf1,Rbm10,Phf14,Sin3a,Pogz,Smarca4,Phf2,Khdrbs1,D…
GO:0080090	regulation of primary metabolic process	0.000197589	Hnrnpc,Rbm5,Smarcc2,Srsf6,Smchd1,Wfs1,Brd7,Ccar2,Adnp,Mbd3,Ptbp2,Ilf3,Dhcr7,Cfl1,Rbm12b2,Sub1,Ahnak,Atrx,Tcf20,Dazap1,Rbm14,Fmr1,Satb2,Dmap1,Son,Nfx1,Ehmt2,Rsf1,Spen,Ddx5,Wtap,Eprs1,Khsrp,H2ax,Pelp1,Acin1,Hnrnpa2b1,Hnrnph2,Sfpq,Virma,Zmynd11,Sumo3,Sptbn4,Safb,Tcerg1,Hnrnph1,Mecp2,Tcof1,Sp4,Slc2a13,Lmo7,Ankle2,Mybbp1a,Ppp1r12a,Hnrnpab,Hnrnpa0,Acsl1,Gtf2i,Srsf3,Bcl11a,Hnrnpu,Tpr,Tcea1,Srsf5,Pabpc4,…
GO:0043170	macromolecule metabolic process	0.000239456	Trip11,Hnrnpc,Rbm5,Smarcc2,Srsf6,Smchd1,Wfs1,Brd7,Ccar2,Adnp,Mbd3,Ptbp2,Ilf3,Cfl1,Stk25,Wdr82,Rpl6,Rbm12b2,Sub1,Dgcr8,Tra2a,Ahnak,Atrx,Tcf20,Dazap1,Rbm14,Cwc25,Fmr1,Satb2,Dmap1,Son,Nfx1,Ehmt2,Rsf1,Spen,Ddx5,Wtap,Matr3,Eprs1,Khsrp,Cpsf1,H2ax,Pelp1,Phf3,Acin1,Rbm19,Hnrnpa2b1,Hnrnph2,Nup214,Smc6,Sfpq,Virma,Zmynd11,Sumo3,Sptbn4,Safb,Tcerg1,Ddx19b,Hnrnph1,Sf3a2,Lsm7,Mecp2,Fkbp15,Pabpn1,Tcof1,Sp4,Slc2a…
GO:0045892	negative regulation of transcription, DNA-templated	0.000244839	Smarcc2,Smchd1,Wfs1,Brd7,Ccar2,Mbd3,Ilf3,Atrx,Satb2,Dmap1,Nfx1,Ehmt2,Rsf1,Spen,Ddx5,H2ax,Hnrnpa2b1,Sfpq,Zmynd11,Tcerg1,Mecp2,Mybbp1a,Hnrnpab,Bcl11a,Hnrnpu,Tpr,Sarnp,Phc3,Myt1l,Bclaf1,Riox1,2700081O15Rik,Nsd2,Bptf,Mphosph8,Cbx5,Deaf1,Rbm10,Phf14,Sin3a,Smarca4,Phf2,Khdrbs1,Daxx,Macroh2a2,Strn3,Kdm5b,Dab2ip,Arid1a,Hnrnpk,Chd3,Igbp1,Zmynd8,Hdac1,Cenpv,Prdm2,Rbfox2,Ylpm1,Znf281,Epc1,Rtf1
GO:1903507	negative regulation of nucleic acid-templated transcription	0.000244839	Smarcc2,Smchd1,Wfs1,Brd7,Ccar2,Mbd3,Ilf3,Atrx,Satb2,Dmap1,Nfx1,Ehmt2,Rsf1,Spen,Ddx5,H2ax,Hnrnpa2b1,Sfpq,Zmynd11,Tcerg1,Mecp2,Mybbp1a,Hnrnpab,Bcl11a,Hnrnpu,Tpr,Sarnp,Phc3,Myt1l,Bclaf1,Riox1,2700081O15Rik,Nsd2,Bptf,Mphosph8,Cbx5,Deaf1,Rbm10,Phf14,Sin3a,Smarca4,Phf2,Khdrbs1,Daxx,Macroh2a2,Strn3,Kdm5b,Dab2ip,Arid1a,Hnrnpk,Chd3,Igbp1,Zmynd8,Hdac1,Cenpv,Prdm2,Rbfox2,Ylpm1,Znf281,Epc1,Rtf1
GO:1902679	negative regulation of RNA biosynthetic process	0.000244839	Smarcc2,Smchd1,Wfs1,Brd7,Ccar2,Mbd3,Ilf3,Atrx,Satb2,Dmap1,Nfx1,Ehmt2,Rsf1,Spen,Ddx5,H2ax,Hnrnpa2b1,Sfpq,Zmynd11,Tcerg1,Mecp2,Mybbp1a,Hnrnpab,Bcl11a,Hnrnpu,Tpr,Sarnp,Phc3,Myt1l,Bclaf1,Riox1,2700081O15Rik,Nsd2,Bptf,Mphosph8,Cbx5,Deaf1,Rbm10,Phf14,Sin3a,Smarca4,Phf2,Khdrbs1,Daxx,Macroh2a2,Strn3,Kdm5b,Dab2ip,Arid1a,Hnrnpk,Chd3,Igbp1,Zmynd8,Hdac1,Cenpv,Prdm2,Rbfox2,Ylpm1,Znf281,Epc1,Rtf1
GO:0010629	negative regulation of gene expression	0.000496501	Hnrnpc,Srsf6,Smchd1,Adnp,Ptbp2,Ilf3,Dgcr8,Fmr1,Ddx5,Eprs1,Khsrp,H2ax,Acin1,Hnrnpa2b1,Lsm7,Mecp2,Hnrnpa0,Bcl11a,Hnrnpu,Tpr,Ndrg2,Pabpc4,Zc3h14,Rnps1,Hnrnpl,Rbm3,Mphosph8,Ncl,Ddx17,Thrap3,Fus,Elavl1,Rbm10,Sin3a,Rbm42,Macroh2a2,Rbmxl1,Pum1,Celf2,Arid1a,Larp1,Hnrnpk,Ppp3ca,Mtor,Hdac1,Cenpv,Znf281,Epc1,Mettl3
GO:0005730	nucleolus	0.00051261	Ilf3,Wdr82,Rpl6,Sub1,Dgcr8,Tra2a,Rbm14,Nop56,Fmr1,Nfx1,Ddx5,Pelp1,Acin1,Rbm19,Tcof1,Mybbp1a,Ppp1r12a,Polr1a,Golga3,Tcea1,Gtf3c3,Srsf5,Zc3h14,Cdkn2aip,Nup153,Riox1,Nifk,Mphosph8,Cbx5,Ncl,Ddx17,Rbm34,Deaf1,Ckap5,Sin3a,Smarca4,Phf2,Daxx,Nop9,Nolc1,Top2b,Eef1d,Fam193b,Chd3,Ftsj3,Spin1,Esf1,Eif3a,Nol6,Tfip11,Wdr33,Dnttip2,Rtf1
GO:0031324	negative regulation of cellular metabolic process	0.000552434	Hnrnpc,Smarcc2,Srsf6,Smchd1,Wfs1,Brd7,Ccar2,Mbd3,Ptbp2,Ilf3,Sub1,Atrx,Fmr1,Satb2,Dmap1,Nfx1,Ehmt2,Rsf1,Spen,Ddx5,Eprs1,Khsrp,H2ax,Acin1,Hnrnpa2b1,Sfpq,Zmynd11,Tcerg1,Mecp2,Fkbp15,Ankle2,Mybbp1a,Hnrnpab,Hnrnpa0,Bcl11a,Hnrnpu,Tpr,Sarnp,Ppp1r8,Phc3,Myt1l,Zc3h14,Rnps1,Bclaf1,Riox1,2700081O15Rik,Hnrnpl,Nsd2,Bptf,Mphosph8,Cbx5,Ncl,Thrap3,Fus,Elavl1,Deaf1,Rbm10,Phf14,Sin3a,Smarca4,Phf2,Khdrbs1,Daxx,Rbm4…
GO:2000112	regulation of cellular macromolecule biosynthetic process	0.000626033	Hnrnpc,Smarcc2,Smchd1,Wfs1,Brd7,Ccar2,Mbd3,Ilf3,Sub1,Atrx,Tcf20,Rbm14,Fmr1,Satb2,Dmap1,Nfx1,Ehmt2,Rsf1,Spen,Ddx5,Eprs1,Khsrp,H2ax,Pelp1,Hnrnpa2b1,Sfpq,Zmynd11,Safb,Tcerg1,Mecp2,Tcof1,Sp4,Lmo7,Mybbp1a,Ppp1r12a,Hnrnpab,Gtf2i,Bcl11a,Hnrnpu,Tpr,Tcea1,Sarnp,Phc3,Myt1l,Med15,Bclaf1,Riox1,2700081O15Rik,Safb2,Hnrnpl,Nsd2,Rbm3,Bptf,Mphosph8,Cbx5,Znf280c,Ncl,Ddx17,Thrap3,Fus,Elavl1,Lrif1,Hmgn1,Tef,Deaf1,Rb…
GO:0009892	negative regulation of metabolic process	0.00078788	Hnrnpc,Smarcc2,Srsf6,Smchd1,Wfs1,Brd7,Ccar2,Adnp,Mbd3,Ptbp2,Ilf3,Sub1,Dgcr8,Atrx,Fmr1,Satb2,Dmap1,Nfx1,Ehmt2,Rsf1,Spen,Ddx5,Eprs1,Khsrp,H2ax,Acin1,Hnrnpa2b1,Sfpq,Zmynd11,Tcerg1,Lsm7,Mecp2,Fkbp15,Ankle2,Mybbp1a,Hnrnpab,Hnrnpa0,Bcl11a,Hnrnpu,Tpr,Ndrg2,Pabpc4,Sarnp,Ppp1r8,Phc3,Myt1l,Zc3h14,Rnps1,Bclaf1,Riox1,2700081O15Rik,Hnrnpl,Nsd2,Rbm3,Bptf,Mphosph8,Cbx5,Ncl,Ddx17,Thrap3,Fus,Elavl1,Deaf1,Rbm10,Ph…
GO:0006325	chromatin organization	0.000987598	Smarcc2,Smchd1,Brd7,Mbd3,Wdr82,Atrx,Rbm14,Fmr1,Satb2,Dmap1,Ehmt2,Rsf1,H2ax,Sfpq,Zmynd11,Mecp2,Hnrnpu,Tpr,Riox1,Nsd2,Bptf,Mphosph8,Hmgn1,Sart3,Phf14,Lmna,Sin3a,Smarca4,Phf2,Daxx,Macroh2a2,Chd2,Setd2,Vps72,Smarcc1,Kdm5b,Hmgn3,Kdm4b,Arid1a,Chd3,Spin1,Hdac1,Cenpv,Znf462,Prdm2,Pbrm1,Epc2,Epc1,Rtf1
GO:0050686	negative regulation of mRNA processing	0.00101475	Srsf6,Acin1,Hnrnpa2b1,Zc3h14,Rnps1,Hnrnpl,Rbm10,Rbm42,Rbmxl1,Hnrnpk,Ccnt1
GO:0051276	chromosome organization	0.00105623	Hnrnpc,Smarcc2,Smchd1,Brd7,Mbd3,Wdr82,Sub1,Atrx,Rbm14,Fmr1,Satb2,Dmap1,Ehmt2,Rsf1,H2ax,Acin1,Hnrnpa2b1,Smc6,Sfpq,Zmynd11,Mecp2,Hnrnpu,Tpr,Riox1,Nsd2,Bptf,Mphosph8,Ik,Hmgn1,Sart3,Phf14,Lmna,Sin3a,Pogz,Smarca4,Phf2,Champ1,Daxx,Top2b,Macroh2a2,Chd2,Mcmdc2,Setd2,Vps72,Smarcc1,Apc,Kdm5b,Hmgn3,Chmp7,Kdm4b,Arid1a,Chd3,Spin1,Hdac1,Cenpv,Znf462,Prdm2,Ylpm1,Pbrm1,Epc2,Epc1,Terf2ip,Rtf1
GO:0034645	cellular macromolecule biosynthetic process	0.00107103	Trip11,Hnrnpc,Smarcc2,Smchd1,Wfs1,Brd7,Ccar2,Mbd3,Ilf3,Rpl6,Sub1,Atrx,Tcf20,Rbm14,Fmr1,Satb2,Dmap1,Nfx1,Ehmt2,Rsf1,Spen,Ddx5,Eprs1,Khsrp,H2ax,Pelp1,Phf3,Hnrnpa2b1,Sfpq,Zmynd11,Safb,Tcerg1,Mecp2,Tcof1,Sp4,Lmo7,Mybbp1a,Ppp1r12a,Hnrnpab,Polr1a,Gtf2i,Bcl11a,Hnrnpu,Tpr,Tcea1,Gtf3c3,Sarnp,Phc3,Myt1l,Med15,Bclaf1,Riox1,2700081O15Rik,Safb2,Hnrnpl,Nsd2,Eef1b,Rbm3,Bptf,Mphosph8,Cbx5,Znf280c,Ncl,Ddx17,Thrap…
GO:0010556	regulation of macromolecule biosynthetic process	0.00113107	Hnrnpc,Smarcc2,Smchd1,Wfs1,Brd7,Ccar2,Mbd3,Ilf3,Sub1,Atrx,Tcf20,Rbm14,Fmr1,Satb2,Dmap1,Nfx1,Ehmt2,Rsf1,Spen,Ddx5,Eprs1,Khsrp,H2ax,Pelp1,Hnrnpa2b1,Sfpq,Zmynd11,Safb,Tcerg1,Mecp2,Tcof1,Sp4,Lmo7,Mybbp1a,Ppp1r12a,Hnrnpab,Gtf2i,Bcl11a,Hnrnpu,Tpr,Tcea1,Sarnp,Phc3,Myt1l,Med15,Bclaf1,Riox1,2700081O15Rik,Safb2,Hnrnpl,Nsd2,Rbm3,Bptf,Mphosph8,Cbx5,Znf280c,Ncl,Ddx17,Thrap3,Fus,Elavl1,Lrif1,Hmgn1,Tef,Deaf1,Rb…
GO:0033119	negative regulation of RNA splicing	0.00127154	Srsf6,Ptbp2,Acin1,Hnrnpa2b1,Rnps1,Hnrnpl,Rbm10,Rbm42,Rbmxl1,Hnrnpk
GO:0006366	transcription by RNA polymerase II	0.00136289	Smarcc2,Wfs1,Brd7,Mbd3,Sub1,Atrx,Tcf20,Rbm14,Satb2,Dmap1,Nfx1,Ehmt2,Rsf1,Spen,Ddx5,Pelp1,Hnrnpa2b1,Sfpq,Zmynd11,Safb,Tcerg1,Mecp2,Sp4,Lmo7,Ppp1r12a,Hnrnpab,Gtf2i,Bcl11a,Hnrnpu,Tpr,Tcea1,Sarnp,Myt1l,Med15,Bclaf1,Safb2,Nsd2,Bptf,Cbx5,Znf280c,Ncl,Ddx17,Thrap3,Fus,Hmgn1,Tef,Deaf1,Rbm10,Phf14,Sin3a,Pogz,Smarca4,Phf2,Khdrbs1,Macroh2a2,Senp1,Setd2,Phip,Prpf6,Smarcc1,Rbmxl1,Strn3,Supt20,Hmgn3,Dab2ip,Arid…
GO:2000113	negative regulation of cellular macromolecule biosynthetic process	0.00144298	Hnrnpc,Smarcc2,Smchd1,Wfs1,Brd7,Ccar2,Mbd3,Ilf3,Atrx,Satb2,Dmap1,Nfx1,Ehmt2,Rsf1,Spen,Ddx5,Eprs1,Khsrp,H2ax,Hnrnpa2b1,Sfpq,Zmynd11,Tcerg1,Mecp2,Mybbp1a,Hnrnpab,Bcl11a,Hnrnpu,Tpr,Sarnp,Phc3,Myt1l,Bclaf1,Riox1,2700081O15Rik,Nsd2,Bptf,Mphosph8,Cbx5,Ncl,Deaf1,Rbm10,Phf14,Sin3a,Smarca4,Phf2,Khdrbs1,Daxx,Macroh2a2,Strn3,Kdm5b,Pum1,Dab2ip,Arid1a,Larp1,Hnrnpk,Chd3,Igbp1,Zmynd8,Hdac1,Cenpv,Prdm2,Rbfox2,Yl…
GO:0006357	regulation of transcription by RNA polymerase II	0.00150514	Smarcc2,Wfs1,Brd7,Mbd3,Sub1,Atrx,Tcf20,Rbm14,Satb2,Dmap1,Nfx1,Ehmt2,Rsf1,Spen,Ddx5,Pelp1,Hnrnpa2b1,Sfpq,Safb,Tcerg1,Mecp2,Sp4,Lmo7,Ppp1r12a,Hnrnpab,Gtf2i,Bcl11a,Hnrnpu,Tpr,Tcea1,Sarnp,Myt1l,Med15,Bclaf1,Safb2,Nsd2,Bptf,Cbx5,Znf280c,Ncl,Ddx17,Thrap3,Fus,Hmgn1,Tef,Deaf1,Rbm10,Phf14,Sin3a,Pogz,Smarca4,Phf2,Khdrbs1,Macroh2a2,Senp1,Phip,Prpf6,Smarcc1,Rbmxl1,Strn3,Supt20,Hmgn3,Dab2ip,Arid1a,Hnrnpk,Chd3…
GO:0009059	macromolecule biosynthetic process	0.0019068	Trip11,Hnrnpc,Smarcc2,Smchd1,Wfs1,Brd7,Ccar2,Mbd3,Ilf3,Rpl6,Sub1,Atrx,Tcf20,Rbm14,Fmr1,Satb2,Dmap1,Nfx1,Ehmt2,Rsf1,Spen,Ddx5,Eprs1,Khsrp,H2ax,Pelp1,Phf3,Hnrnpa2b1,Sfpq,Zmynd11,Safb,Tcerg1,Mecp2,Tcof1,Sp4,Lmo7,Mybbp1a,Ppp1r12a,Hnrnpab,Polr1a,Gtf2i,Bcl11a,Hnrnpu,Tpr,Tcea1,Gtf3c3,Sarnp,Phc3,Myt1l,Med15,Bclaf1,Riox1,2700081O15Rik,Safb2,Hnrnpl,Nsd2,Eef1b,Rbm3,Bptf,Mphosph8,Cbx5,Znf280c,Ncl,Ddx17,Thrap…
GO:0010558	negative regulation of macromolecule biosynthetic process	0.00202767	Hnrnpc,Smarcc2,Smchd1,Wfs1,Brd7,Ccar2,Mbd3,Ilf3,Atrx,Satb2,Dmap1,Nfx1,Ehmt2,Rsf1,Spen,Ddx5,Eprs1,Khsrp,H2ax,Hnrnpa2b1,Sfpq,Zmynd11,Tcerg1,Mecp2,Mybbp1a,Hnrnpab,Bcl11a,Hnrnpu,Tpr,Sarnp,Phc3,Myt1l,Bclaf1,Riox1,2700081O15Rik,Nsd2,Bptf,Mphosph8,Cbx5,Ncl,Deaf1,Rbm10,Phf14,Sin3a,Smarca4,Phf2,Khdrbs1,Daxx,Macroh2a2,Strn3,Kdm5b,Pum1,Dab2ip,Arid1a,Larp1,Hnrnpk,Chd3,Igbp1,Zmynd8,Hdac1,Cenpv,Prdm2,Rbfox2,Yl…
GO:0060255	regulation of macromolecule metabolic process	0.00251427	Hnrnpc,Rbm5,Smarcc2,Srsf6,Smchd1,Wfs1,Brd7,Ccar2,Adnp,Mbd3,Ptbp2,Ilf3,Cfl1,Rbm12b2,Sub1,Dgcr8,Ahnak,Atrx,Tcf20,Dazap1,Rbm14,Fmr1,Satb2,Dmap1,Son,Nfx1,Ehmt2,Rsf1,Spen,Ddx5,Wtap,Matr3,Eprs1,Khsrp,H2ax,Pelp1,Acin1,Hnrnpa2b1,Hnrnph2,Sfpq,Virma,Zmynd11,Sumo3,Sptbn4,Safb,Tcerg1,Hnrnph1,Lsm7,Mecp2,Tcof1,Sp4,Slc2a13,Lmo7,Ankle2,Mybbp1a,Ppp1r12a,Hnrnpab,Hnrnpa0,Acsl1,Gtf2i,Srsf3,Bcl11a,Hnrnpu,Tpr,Tcea1,Nd…
GO:0098687	chromosomal region	0.00252974	Smchd1,Wdr82,Atrx,Fmr1,H2ax,Hnrnpa2b1,Smc6,Ahctf1,Ppp1r12a,Hnrnpu,Tpr,Uhrf2,Cbx5,Lrif1,Ckap5,Sin3a,Phf2,Champ1,Daxx,Apc,Kdm4b,Tfip11,Cenpv,Pbrm1,Tp53bp1,Terf2ip
GO:0031326	regulation of cellular biosynthetic process	0.00399707	Hnrnpc,Smarcc2,Smchd1,Wfs1,Brd7,Ccar2,Mbd3,Ilf3,Sub1,Atrx,Tcf20,Rbm14,Fmr1,Satb2,Dmap1,Nfx1,Ehmt2,Rsf1,Spen,Ddx5,Eprs1,Khsrp,H2ax,Pelp1,Hnrnpa2b1,Sfpq,Zmynd11,Safb,Tcerg1,Mecp2,Tcof1,Sp4,Lmo7,Mybbp1a,Ppp1r12a,Hnrnpab,Gtf2i,Bcl11a,Hnrnpu,Tpr,Tcea1,Sarnp,Phc3,Myt1l,Med15,Bclaf1,Riox1,2700081O15Rik,Safb2,Hnrnpl,Nsd2,Rbm3,Bptf,Mphosph8,Cbx5,Znf280c,Ncl,Ddx17,Thrap3,Fus,Elavl1,Lrif1,Hmgn1,Tef,Deaf1,Rb…
GO:0006405	RNA export from nucleus	0.00409082	Hnrnpa2b1,Nup214,Ddx19b,Pabpn1,Srsf3,Tpr,Sarnp,Nup153,Pom121,Nxf1,Khdrbs1,Setd2,Alyref,Nol6
GO:0048025	negative regulation of mRNA splicing, via spliceosome	0.00418837	Srsf6,Acin1,Hnrnpa2b1,Rnps1,Hnrnpl,Rbm10,Rbm42,Rbmxl1,Hnrnpk
GO:0031327	negative regulation of cellular biosynthetic process	0.00463383	Hnrnpc,Smarcc2,Smchd1,Wfs1,Brd7,Ccar2,Mbd3,Ilf3,Atrx,Satb2,Dmap1,Nfx1,Ehmt2,Rsf1,Spen,Ddx5,Eprs1,Khsrp,H2ax,Hnrnpa2b1,Sfpq,Zmynd11,Tcerg1,Mecp2,Mybbp1a,Hnrnpab,Bcl11a,Hnrnpu,Tpr,Sarnp,Phc3,Myt1l,Bclaf1,Riox1,2700081O15Rik,Nsd2,Bptf,Mphosph8,Cbx5,Ncl,Deaf1,Rbm10,Phf14,Sin3a,Smarca4,Phf2,Khdrbs1,Daxx,Macroh2a2,Strn3,Kdm5b,Pum1,Dab2ip,Arid1a,Larp1,Hnrnpk,Chd3,Igbp1,Zmynd8,Hdac1,Cenpv,Prdm2,Rbfox2,Yl…
GO:0044271	cellular nitrogen compound biosynthetic process	0.00561743	Hnrnpc,Smarcc2,Smchd1,Wfs1,Brd7,Ccar2,Mbd3,Ilf3,Rpl6,Sub1,Atrx,Tcf20,Rbm14,Fmr1,Satb2,Dmap1,Nfx1,Ehmt2,Rsf1,Spen,Ddx5,Eprs1,Khsrp,H2ax,Pelp1,Phf3,Hnrnpa2b1,Sfpq,Zmynd11,Safb,Tcerg1,Mecp2,Tcof1,Sp4,Lmo7,Mybbp1a,Ppp1r12a,Hnrnpab,Acsl1,Polr1a,Gtf2i,Spr,Bcl11a,Hnrnpu,Tpr,Tcea1,Gtf3c3,Sarnp,Phc3,Myt1l,Med15,Bclaf1,Riox1,2700081O15Rik,Safb2,Hnrnpl,Nsd2,Eef1b,Rbm3,Bptf,Mphosph8,Cbx5,Znf280c,Ncl,Ddx17,Th…
GO:0009889	regulation of biosynthetic process	0.00579054	Hnrnpc,Smarcc2,Smchd1,Wfs1,Brd7,Ccar2,Mbd3,Ilf3,Dhcr7,Sub1,Atrx,Tcf20,Rbm14,Fmr1,Satb2,Dmap1,Nfx1,Ehmt2,Rsf1,Spen,Ddx5,Eprs1,Khsrp,H2ax,Pelp1,Hnrnpa2b1,Sfpq,Zmynd11,Safb,Tcerg1,Mecp2,Tcof1,Sp4,Lmo7,Mybbp1a,Ppp1r12a,Hnrnpab,Gtf2i,Bcl11a,Hnrnpu,Tpr,Tcea1,Sarnp,Phc3,Myt1l,Med15,Bclaf1,Riox1,2700081O15Rik,Safb2,Hnrnpl,Nsd2,Rbm3,Bptf,Mphosph8,Cbx5,Znf280c,Ncl,Ddx17,Thrap3,Fus,Elavl1,Lrif1,Hmgn1,Tef,De…
GO:0031323	regulation of cellular metabolic process	0.00669928	Hnrnpc,Rbm5,Smarcc2,Srsf6,Smchd1,Wfs1,Brd7,Ccar2,Adnp,Mbd3,Ptbp2,Ilf3,Cfl1,Rbm12b2,Sub1,Ahnak,Atrx,Tcf20,Dazap1,Rbm14,Fmr1,Satb2,Dmap1,Son,Nfx1,Ehmt2,Rsf1,Spen,Ddx5,Wtap,Eprs1,Khsrp,H2ax,Pelp1,Acin1,Hnrnpa2b1,Hnrnph2,Sfpq,Virma,Zmynd11,Sumo3,Sptbn4,Safb,Tcerg1,Hnrnph1,Mecp2,Fkbp15,Tcof1,Sp4,Slc2a13,Lmo7,Ankle2,Mybbp1a,Ppp1r12a,Hnrnpab,Hnrnpa0,Acsl1,Gtf2i,Srsf3,Bcl11a,Hnrnpu,Tpr,Tcea1,Srsf5,Pabpc4…
GO:0034654	nucleobase-containing compound biosynthetic process	0.010951	Hnrnpc,Smarcc2,Smchd1,Wfs1,Brd7,Ccar2,Mbd3,Ilf3,Sub1,Atrx,Tcf20,Rbm14,Satb2,Dmap1,Nfx1,Ehmt2,Rsf1,Spen,Ddx5,Khsrp,H2ax,Pelp1,Phf3,Hnrnpa2b1,Sfpq,Zmynd11,Safb,Tcerg1,Mecp2,Tcof1,Sp4,Lmo7,Mybbp1a,Ppp1r12a,Hnrnpab,Acsl1,Polr1a,Gtf2i,Bcl11a,Hnrnpu,Tpr,Tcea1,Gtf3c3,Sarnp,Phc3,Myt1l,Med15,Bclaf1,Riox1,2700081O15Rik,Safb2,Nsd2,Bptf,Mphosph8,Cbx5,Znf280c,Ncl,Ddx17,Thrap3,Fus,Lrif1,Hmgn1,Tef,Deaf1,Rbm10,P…
GO:0018130	heterocycle biosynthetic process	0.0114641	Hnrnpc,Smarcc2,Smchd1,Wfs1,Brd7,Ccar2,Mbd3,Ilf3,Sub1,Atrx,Tcf20,Rbm14,Satb2,Dmap1,Nfx1,Ehmt2,Rsf1,Spen,Ddx5,Khsrp,H2ax,Pelp1,Phf3,Hnrnpa2b1,Sfpq,Zmynd11,Safb,Tcerg1,Mecp2,Tcof1,Sp4,Lmo7,Mybbp1a,Ppp1r12a,Hnrnpab,Acsl1,Polr1a,Gtf2i,Spr,Bcl11a,Hnrnpu,Tpr,Tcea1,Gtf3c3,Sarnp,Phc3,Myt1l,Med15,Bclaf1,Riox1,2700081O15Rik,Safb2,Nsd2,Bptf,Mphosph8,Cbx5,Znf280c,Ncl,Ddx17,Thrap3,Fus,Lrif1,Hmgn1,Tef,Deaf1,Rbm…
GO:0009890	negative regulation of biosynthetic process	0.0125909	Hnrnpc,Smarcc2,Smchd1,Wfs1,Brd7,Ccar2,Mbd3,Ilf3,Atrx,Satb2,Dmap1,Nfx1,Ehmt2,Rsf1,Spen,Ddx5,Eprs1,Khsrp,H2ax,Hnrnpa2b1,Sfpq,Zmynd11,Tcerg1,Mecp2,Mybbp1a,Hnrnpab,Bcl11a,Hnrnpu,Tpr,Sarnp,Phc3,Myt1l,Bclaf1,Riox1,2700081O15Rik,Nsd2,Bptf,Mphosph8,Cbx5,Ncl,Deaf1,Rbm10,Phf14,Sin3a,Smarca4,Phf2,Khdrbs1,Daxx,Macroh2a2,Strn3,Kdm5b,Pum1,Dab2ip,Arid1a,Larp1,Hnrnpk,Chd3,Igbp1,Zmynd8,Hdac1,Cenpv,Prdm2,Rbfox2,Yl…
GO:0019438	aromatic compound biosynthetic process	0.0137196	Hnrnpc,Smarcc2,Smchd1,Wfs1,Brd7,Ccar2,Mbd3,Ilf3,Sub1,Atrx,Tcf20,Rbm14,Satb2,Dmap1,Nfx1,Ehmt2,Rsf1,Spen,Ddx5,Khsrp,H2ax,Pelp1,Phf3,Hnrnpa2b1,Sfpq,Zmynd11,Safb,Tcerg1,Mecp2,Tcof1,Sp4,Lmo7,Mybbp1a,Ppp1r12a,Hnrnpab,Acsl1,Polr1a,Gtf2i,Spr,Bcl11a,Hnrnpu,Tpr,Tcea1,Gtf3c3,Sarnp,Phc3,Myt1l,Med15,Bclaf1,Riox1,2700081O15Rik,Safb2,Nsd2,Bptf,Mphosph8,Cbx5,Znf280c,Ncl,Ddx17,Thrap3,Fus,Lrif1,Hmgn1,Tef,Deaf1,Rbm…
GO:0045935	positive regulation of nucleobase-containing compound metabolic process	0.0165926	Smarcc2,Smchd1,Brd7,Ccar2,Ilf3,Sub1,Atrx,Tcf20,Dazap1,Rbm14,Satb2,Rsf1,Ddx5,Khsrp,Pelp1,Hnrnpa2b1,Sfpq,Safb,Tcerg1,Mecp2,Lmo7,Ppp1r12a,Hnrnpab,Gtf2i,Hnrnpu,Tcea1,Srsf5,Myt1l,Bclaf1,Nsd2,Rbm3,Bptf,Rbm22,Ncl,Ddx17,Thrap3,Fus,Tef,Deaf1,Sin3a,Pogz,Smarca4,Phf2,Daxx,Nolc1,Top2b,Senp1,Phip,Prpf6,Smarcc1,Rbmxl1,Strn3,Supt20,Hmgn3,Pum1,Dab2ip,Arid1a,Hnrnpk,Rai1,Spin1,Ikbkg,Ppp3ca,Igbp1,Ccnt1,Mtor,Hdac1,Z…
GO:0051254	positive regulation of RNA metabolic process	0.0176663	Smarcc2,Brd7,Ccar2,Ilf3,Sub1,Atrx,Tcf20,Dazap1,Rbm14,Satb2,Rsf1,Ddx5,Khsrp,Pelp1,Sfpq,Safb,Tcerg1,Mecp2,Lmo7,Ppp1r12a,Hnrnpab,Gtf2i,Hnrnpu,Tcea1,Srsf5,Myt1l,Bclaf1,Rbm3,Bptf,Rbm22,Ncl,Ddx17,Thrap3,Tef,Deaf1,Sin3a,Pogz,Smarca4,Phf2,Daxx,Nolc1,Senp1,Phip,Prpf6,Smarcc1,Rbmxl1,Strn3,Supt20,Hmgn3,Pum1,Dab2ip,Arid1a,Hnrnpk,Rai1,Spin1,Ikbkg,Ppp3ca,Igbp1,Ccnt1,Mtor,Hdac1,Znf462,Prdm2,Pbrm1,Tp53bp1,Cdc5l,…
GO:0006403	RNA localization	0.0203738	Khsrp,Hnrnpa2b1,Nup214,Ddx19b,Pabpn1,Ahctf1,Srsf3,Hnrnpu,Tpr,Hnrnpa3,Sarnp,Nup153,Pom121,Nxf1,Khdrbs1,Setd2,Prpf6,Alyref,Nol6,Ncbp3
REAC:R-MMU-2990846	SUMOylation	0.0204896	Hnrnpc,Satb2,Nup214,Smc6,Sumo3,Safb,Tpr,Uhrf2,Phc3,Nup153,Ddx17,Pom121,Sin3a,Top2b,Senp1,Hnrnpk,Ikbkg,Hdac1,Tp53bp1
GO:1901362	organic cyclic compound biosynthetic process	0.0226174	Hnrnpc,Smarcc2,Smchd1,Wfs1,Brd7,Ccar2,Mbd3,Ilf3,Dhcr7,Sub1,Atrx,Tcf20,Rbm14,Satb2,Dmap1,Nfx1,Ehmt2,Rsf1,Spen,Ddx5,Khsrp,H2ax,Pelp1,Phf3,Hnrnpa2b1,Sfpq,Zmynd11,Safb,Tcerg1,Mecp2,Tcof1,Sp4,Lmo7,Mybbp1a,Ppp1r12a,Hnrnpab,Acsl1,Polr1a,Gtf2i,Spr,Bcl11a,Hnrnpu,Tpr,Tcea1,Gtf3c3,Sarnp,Phc3,Myt1l,Med15,Bclaf1,Riox1,2700081O15Rik,Safb2,Nsd2,Bptf,Mphosph8,Cbx5,Znf280c,Ncl,Ddx17,Thrap3,Fus,Lrif1,Hmgn1,Tef,Dea…
GO:0005622	intracellular anatomical structure	0.0237274	Trip11,Hnrnpc,Rbm5,Smarcc2,Hnrnpdl,Srsf6,Smchd1,Wfs1,Brd7,Ccar2,Adnp,Mbd3,Ptbp2,Ilf3,Tmem87a,Dhcr7,Cfl1,Stk25,Wdr82,Rpl6,Rbm12b2,Sub1,Dgcr8,Tra2a,Ahnak,Srpra,Atrx,Tcf20,Dazap1,Rbm14,Nop56,Chrm3,Cwc25,Dst,Sptb,Fmr1,Satb2,Dmap1,Lmnb1,Son,Fam169a,Macf1,Mia3,Nfx1,Ehmt2,Rtkn,Rsf1,Spen,Ddx5,St13,Wtap,Matr3,Eprs1,Khsrp,Rabgap1,Cpsf1,H2ax,Pelp1,Acin1,Rbm19,Hnrnpa2b1,Hnrnph2,Nup214,Smc6,Sfpq,Virma,Zmynd11…
GO:0000775	chromosome, centromeric region	0.0279848	Atrx,Fmr1,Smc6,Ahctf1,Ppp1r12a,Hnrnpu,Tpr,Uhrf2,Cbx5,Ckap5,Sin3a,Phf2,Champ1,Daxx,Apc,Kdm4b,Cenpv,Pbrm1,Tp53bp1
GO:0010557	positive regulation of macromolecule biosynthetic process	0.0290486	Smarcc2,Brd7,Ccar2,Ilf3,Sub1,Atrx,Tcf20,Rbm14,Fmr1,Satb2,Rsf1,Pelp1,Sfpq,Safb,Tcerg1,Mecp2,Lmo7,Ppp1r12a,Hnrnpab,Gtf2i,Hnrnpu,Tcea1,Myt1l,Bclaf1,Hnrnpl,Rbm3,Bptf,Ncl,Ddx17,Thrap3,Elavl1,Tef,Deaf1,Sin3a,Pogz,Smarca4,Phf2,Khdrbs1,Daxx,Nolc1,Senp1,Phip,Prpf6,Smarcc1,Rbmxl1,Larp4,Strn3,Supt20,Hmgn3,Dab2ip,Arid1a,Larp1,Hnrnpk,Rai1,Spin1,Ikbkg,Golga2,Ppp3ca,Igbp1,Ccnt1,Mtor,Hdac1,Znf462,Prdm2,Pbrm1,Tp5…
GO:0050658	RNA transport	0.0323086	Khsrp,Hnrnpa2b1,Nup214,Ddx19b,Pabpn1,Ahctf1,Srsf3,Tpr,Hnrnpa3,Sarnp,Nup153,Pom121,Nxf1,Khdrbs1,Setd2,Alyref,Nol6,Ncbp3
GO:0050657	nucleic acid transport	0.0323086	Khsrp,Hnrnpa2b1,Nup214,Ddx19b,Pabpn1,Ahctf1,Srsf3,Tpr,Hnrnpa3,Sarnp,Nup153,Pom121,Nxf1,Khdrbs1,Setd2,Alyref,Nol6,Ncbp3
GO:0010608	posttranscriptional regulation of gene expression	0.0349343	Hnrnpc,Ilf3,Dgcr8,Fmr1,Ddx5,Matr3,Eprs1,Khsrp,Hnrnpa2b1,Mecp2,Tcof1,Hnrnpa0,Hnrnpu,Tpr,Pabpc4,Sarnp,Zc3h14,Hnrnpl,Rbm3,Ncl,Thrap3,Fus,Elavl1,Rbm10,Khdrbs1,Nolc1,Larp4,Pum1,Celf2,Larp1,Ppp3ca,Mtor,Mettl3
GO:0043232	intracellular non-membrane-bounded organelle	0.0408926	Hnrnpc,Smarcc2,Smchd1,Ccar2,Mbd3,Ilf3,Cfl1,Wdr82,Rpl6,Sub1,Dgcr8,Tra2a,Ahnak,Atrx,Rbm14,Nop56,Dst,Sptb,Fmr1,Satb2,Dmap1,Lmnb1,Macf1,Nfx1,Ehmt2,Rtkn,Rsf1,Ddx5,Khsrp,Rabgap1,H2ax,Pelp1,Acin1,Rbm19,Hnrnpa2b1,Smc6,Sfpq,Zmynd11,Sptbn4,Ddx19b,Mecp2,Fkbp15,Tcof1,Ahctf1,Mybbp1a,Ppp1r12a,Polr1a,Golga3,Hnrnpu,Tpr,Tcea1,Gtf3c3,Uhrf2,Hnrnpa3,Srsf5,Pabpc4,Sarnp,Myt1l,Zc3h14,Cdkn2aip,Nup153,Strbp,Riox1,Nifk,Hn…
GO:0051236	establishment of RNA localization	0.0444344	Khsrp,Hnrnpa2b1,Nup214,Ddx19b,Pabpn1,Ahctf1,Srsf3,Tpr,Hnrnpa3,Sarnp,Nup153,Pom121,Nxf1,Khdrbs1,Setd2,Alyref,Nol6,Ncbp3
REAC:R-MMU-72202	Transport of Mature Transcript to Cytoplasm	0.0456522	Srsf6,Cpsf1,Nup214,Srsf3,Tpr,Srsf5,Sarnp,Rnps1,Nup153,Pom121,Nxf1,Alyref,Dhx38,Wdr33

## Sheet: Table S2E. TTX Cluster 1
GO.ID	Description	FDR	Genes
GO:0036477	somatodendritic compartment	1.08735e-06	Ptges3,Wfs1,Kndc1,Srebf2,Cacng3,Afdn,Shank2,Ppp1r9b,Pclo,Ptpn5,Hnrnpa2b1,Adgrb1,Sorbs2,Itsn1,Map1b,Dlgap4,Ica1,Stau2,Fus,Crhr1,Synpo,Shroom2,Grk2,Mapk1,Kalrn,Pmm1,Shank3,Cfl1,Map2,Srgap2,Fchsd1,Map1a,Mbp,Golga2,Strn3,Syndig1,Phax,Sipa1l1,Psd,Kif21a,Trak2,Arhgef2,Sptbn4,Syap1,Lzts3,Clip2,Pde1a,Inpp5j,Erc2,Begain,Bsn,Eif4b,Ank3,Pex5l,Akap5,Farp1,Strn,Dbn1,Exoc4,Prex1,Camk2a,Arhgef7,Chrm3,Magi2,Dab2…
GO:0098984	neuron to neuron synapse	2.18036e-05	Add2,Cacng3,Shank2,Ppp1r9b,Pclo,Adgrb1,Sorbs2,Map1b,Camk1,Synpo,Mapk1,Slc16a7,Add3,Dclk1,Kalrn,Rpl6,Shank3,Map2,Srgap2,Map1a,Pja2,Syndig1,Ank2,Dnajc6,Sipa1l1,Psd,Arhgef2,Prkar1b,Lzts3,Erc2,Eif3a,Bsn,Akap5,Strn,Dbn1,Exoc4,Camk2a,Rps6kc1,Chrm3,Magi2,Stxbp5
GO:0014069	postsynaptic density	3.34405e-05	Add2,Cacng3,Shank2,Ppp1r9b,Pclo,Adgrb1,Sorbs2,Map1b,Camk1,Synpo,Mapk1,Slc16a7,Add3,Dclk1,Kalrn,Rpl6,Shank3,Map2,Srgap2,Map1a,Pja2,Syndig1,Ank2,Dnajc6,Sipa1l1,Psd,Arhgef2,Lzts3,Erc2,Eif3a,Bsn,Akap5,Strn,Dbn1,Exoc4,Camk2a,Rps6kc1,Chrm3,Magi2
GO:0099572	postsynaptic specialization	5.38317e-05	Add2,Cacng3,Shank2,Ppp1r9b,Pclo,Adgrb1,Sorbs2,Map1b,Dlgap4,Camk1,Synpo,Mapk1,Slc16a7,Add3,Dclk1,Kalrn,Rpl6,Shank3,Map2,Srgap2,Map1a,Pja2,Syndig1,Ank2,Dnajc6,Sipa1l1,Psd,Arhgef2,Lzts3,Erc2,Eif3a,Bsn,Akap5,Strn,Dbn1,Exoc4,Camk2a,Rps6kc1,Chrm3,Magi2
GO:0032279	asymmetric synapse	5.85145e-05	Add2,Cacng3,Shank2,Ppp1r9b,Pclo,Adgrb1,Sorbs2,Map1b,Camk1,Synpo,Mapk1,Slc16a7,Add3,Dclk1,Kalrn,Rpl6,Shank3,Map2,Srgap2,Map1a,Pja2,Syndig1,Ank2,Dnajc6,Sipa1l1,Psd,Arhgef2,Lzts3,Erc2,Eif3a,Bsn,Akap5,Strn,Dbn1,Exoc4,Camk2a,Rps6kc1,Chrm3,Magi2
GO:0097447	dendritic tree	0.000114633	Wfs1,Kndc1,Srebf2,Cacng3,Shank2,Ppp1r9b,Pclo,Ptpn5,Adgrb1,Sorbs2,Itsn1,Map1b,Dlgap4,Ica1,Stau2,Fus,Crhr1,Synpo,Grk2,Mapk1,Shank3,Cfl1,Map2,Srgap2,Map1a,Strn3,Syndig1,Sipa1l1,Psd,Kif21a,Trak2,Arhgef2,Syap1,Lzts3,Clip2,Inpp5j,Begain,Bsn,Eif4b,Ank3,Pex5l,Akap5,Farp1,Strn,Dbn1,Exoc4,Prex1,Camk2a,Chrm3,Magi2,Dab2ip
GO:0030425	dendrite	0.000114633	Wfs1,Kndc1,Srebf2,Cacng3,Shank2,Ppp1r9b,Pclo,Ptpn5,Adgrb1,Sorbs2,Itsn1,Map1b,Dlgap4,Ica1,Stau2,Fus,Crhr1,Synpo,Grk2,Mapk1,Shank3,Cfl1,Map2,Srgap2,Map1a,Strn3,Syndig1,Sipa1l1,Psd,Kif21a,Trak2,Arhgef2,Syap1,Lzts3,Clip2,Inpp5j,Begain,Bsn,Eif4b,Ank3,Pex5l,Akap5,Farp1,Strn,Dbn1,Exoc4,Prex1,Camk2a,Chrm3,Magi2,Dab2ip
GO:0005856	cytoskeleton	0.000194463	Ptges3,Dido1,Bmerb1,Map7d2,Add2,Lrif1,Shank2,Ppp1r9b,Pclo,Sorbs2,Itsn1,Map1b,Rab11fip5,Cep170,Stau2,Nav1,Synpo,Shroom2,Strbp,Hnrnpc,Mapk1,Map9,Hid1,Ckap5,Ubr4,Add3,Kalrn,Cfl1,Ppp1r12a,Herc2,Marcks,Map2,Nudc,Fchsd1,Tacc1,Map1a,Golga2,Pja2,Mprip,Ubxn2b,Myh9,Phax,Usp10,Ank2,Mtus2,Sipa1l1,Git1,Kif21a,Ift43,Arhgef2,Cdc42bpb,Prkar1a,Pacsin2,Sptbn4,Lzts3,Clip2,Arhgap35,Erc2,Mtss2,Dync1li2,Mycbp2,Rap1gap…
GO:0098794	postsynapse	0.000383912	Add2,Cacng3,Shank2,Ppp1r9b,Pclo,Hnrnpa2b1,Adgrb1,Sorbs2,Itsn1,Map1b,Dlgap4,Camk1,Fus,Synpo,Grk2,Mapk1,Slc16a7,Add3,Dclk1,Kalrn,Rpl6,Shank3,Cfl1,Map2,Srgap2,Map1a,Pja2,Syndig1,Ank2,Dnajc6,Sipa1l1,Git1,Psd,Arhgef2,Syap1,Lzts3,Erc2,Eif3a,Begain,Bsn,Eif4b,Ank3,Akap5,Farp1,Strn,Dbn1,Exoc4,Camk2a,Arhgef7,Rps6kc1,Chrm3,Magi2
GO:0043025	neuronal cell body	0.000544355	Ptges3,Kndc1,Shank2,Ppp1r9b,Pclo,Ptpn5,Hnrnpa2b1,Sorbs2,Itsn1,Map1b,Dlgap4,Stau2,Fus,Crhr1,Synpo,Shroom2,Mapk1,Kalrn,Pmm1,Cfl1,Map2,Fchsd1,Map1a,Mbp,Golga2,Strn3,Phax,Sipa1l1,Trak2,Arhgef2,Sptbn4,Syap1,Pde1a,Erc2,Begain,Bsn,Eif4b,Akap5,Strn,Dbn1,Exoc4,Camk2a,Arhgef7,Dab2ip
GO:0044297	cell body	0.00189183	Ptges3,Kndc1,Shank2,Ppp1r9b,Pclo,Ptpn5,Hnrnpa2b1,Sorbs2,Itsn1,Map1b,Dlgap4,Stau2,Fus,Crhr1,Synpo,Shroom2,Mapk1,Kalrn,Pmm1,Cfl1,Map2,Fchsd1,Map1a,Mbp,Golga2,Strn3,Syndig1,Phax,Sipa1l1,Trak2,Arhgef2,Sptbn4,Syap1,Pde1a,Erc2,Begain,Bsn,Eif4b,Akap5,Strn,Dbn1,Pitpnm3,Exoc4,Camk2a,Arhgef7,Dab2ip
GO:0016358	dendrite development	0.00437227	Kndc1,Afdn,Shank2,Ppp1r9b,Itsn1,Map1b,Stau2,Camk1,Dclk1,Kalrn,Shank3,Cfl1,Map2,Srgap2,Map1a,Sipa1l1,Git1,Trak2,Lzts3,Akap5,Farp1,Strn,Dbn1,Prex1,Camk2a,Srcin1,Dab2ip
GO:0007010	cytoskeleton organization	0.00662495	Bmerb1,Map7d2,Add2,Ppp1r9b,Pclo,Adgrb1,Sorbs2,Map1b,Stau2,Nav1,Atrx,Synpo,Shroom2,Mapk1,Map9,Ckap5,Add3,Shank3,Cfl1,Ppp1r12a,Marcks,Map2,Nudc,Rap1gds1,Srgap2,Trim32,Fchsd1,Tacc1,Map1a,Prune1,Golga2,Mprip,Ubxn2b,Myh9,Ank2,Sipa1l1,Git1,Arhgef2,Cdc42bpb,Prkar1a,Pacsin2,Sptbn4,Clip2,Arhgap35,Inpp5j,Tasor,Dync1li2,Mycbp2,Ank3,Sipa1l3,Mapk3,Farp1,Ppm1e,Dbn1,Prex1,Ehbp1,Nav3,Evl,Arhgef7,Afap1,Tacc2
GO:0043228	non-membrane-bounded organelle	0.0252256	Ptges3,Dido1,Smarcc2,Tp53bp1,Bmerb1,Map7d2,Add2,Smarca4,Lrif1,Shank2,Ppp1r9b,Ehmt2,Pclo,Hnrnpa2b1,Sorbs2,Itsn1,Map1b,Rab11fip5,Cep170,Top2b,Stau2,Nav1,Atrx,Synpo,Shroom2,Strbp,Hnrnpc,Mapk1,Map9,Clasp2,Myt1l,Ahctf1,Smarca1,Hid1,Tra2a,Ckap5,Ubr4,Add3,Kalrn,Rpl6,Shank3,Cfl1,Golga3,Ppp1r12a,Herc2,Marcks,Map2,Nudc,Trim32,Fchsd1,Tacc1,Map1a,Fam193b,Sub1,Golga2,Rsf1,Ncl,Nufip2,Pja2,Terf2ip,Mprip,Ubxn2b,…
GO:0022008	neurogenesis	0.0320627	Kndc1,Bmerb1,Prickle2,Smarca4,Afdn,Shank2,Ppp1r9b,Ehmt2,Ptpn5,Itsn1,Map1b,Top2b,Stau2,Camk1,Nav1,Grk2,Mapk1,Myt1l,Smarca1,Herc1,Dclk1,Kalrn,Frs2,Shank3,Cfl1,Map2,Srgap2,Trim32,Tacc1,Map1a,Prune1,Golga2,Hdac9,Sipa1l1,Git1,Psd,Trak2,Arhgef2,Sptbn4,Lzts3,Arhgap35,Inpp5j,Clmn,Mycbp2,Rap1gap2,Secisbp2,Ank3,Mapk3,Ptpra,Akap5,Farp1,Sin3a,Strn,Ulk2,Cnr1,Dbn1,Exoc4,Prex1,Nav3,Camk2a,Evl,Srcin1,Arhgef7,Rim…
GO:0045202	synapse	0.036003	Wfs1,Iqsec2,Cacnb2,Add2,Cacng3,Afdn,Shank2,Ppp1r9b,Pclo,Ptpn5,Hnrnpa2b1,Adgrb1,Sorbs2,Itsn1,Map1b,Dlgap4,Ica1,Camk1,Fus,Synpo,Grk2,Mapk1,Slc16a7,Add3,Dclk1,Kalrn,Rpl6,Shank3,Cfl1,Map2,Srgap2,Fchsd1,Map1a,Pja2,Syndig1,Myh9,Rtn3,Ank2,Dnajc6,Sipa1l1,Git1,Aak1,Psd,Arhgef2,Prkar1b,Prkar1a,Pacsin2,Syap1,Lzts3,Dmxl2,Erc2,Eif3a,Hdac4,Begain,Bsn,Eif4b,Ank3,Ptpra,Akap5,Farp1,Strn,Cnr1,Dbn1,Exoc4,Camk2a,Arh…
GO:0007399	nervous system development	0.0483144	Kndc1,Smarcc2,Bmerb1,Add2,Prickle2,Smarca4,Afdn,Shank2,Ppp1r9b,Ehmt2,Pclo,Ptpn5,Adgrb1,Itsn1,Map1b,Top2b,Stau2,Camk1,Nav1,Atrx,Crhr1,Shroom2,Grk2,Mapk1,Myt1l,Smarca1,Herc1,Dclk1,Kalrn,Frs2,Shank3,Cfl1,Marcks,Map2,Gart,Srgap2,Trim32,Tacc1,Map1a,Mbp,Rfx4,Prune1,Golga2,Hdac9,Syndig1,Ank2,Sipa1l1,Git1,Psd,Trak2,Arhgef2,Sptbn4,Lzts3,Arhgap35,Inpp5j,Clmn,Mycbp2,Rap1gap2,Hmgcs1,Secisbp2,Bsn,Ank3,Mapk3,P…
WP:WP251	MAPK Cascade	0.0495114	Mapk1,Map2,Mbp,Rasa3,Mapk3

## Sheet: Table S2F. TTX Cluster 2
GO.ID	Description	FDR	Genes
GO:0043005	neuron projection	5.96229e-12	Lmtk2,Akap5,Sorbs2,Kcnd3,Dlg2,Sipa1l1,Pde4b,Pam,Pdzd2,Cdk5r1,Psd,Cacna1a,Ephb6,Arhgap32,Syngap1,Farp1,Sh3kbp1,Mark4,Tiam2,Numa1,Gabra3,Hcn2,Map1b,Ppfia2,Tsc1,Dicer1,Cnr1,Gprin1,Ctnna2,Gabbr1,Stmn1,Cask,Map4,Ephb1,Cnksr2,Bsn,Fkbp15,Map1a,Map2,Homer2,Atp2b1,Sort1,Arhgef2,Sybu,Rangap1,Sptbn1,Mycbp2,Adgrl2,Dlgap2,Cacna1b,Wasf1,Glrb,Ar,Nf1,Ppp1r9b,Dennd1a,Pacsin1,Grm5,Ptprn2,Myo5a,Dbn1,Htt,Ank3,Begain…
GO:0098794	postsynapse	1.10099e-10	Akap5,Sorbs2,Kcnd3,Dlg5,Dlg2,Sipa1l1,Pde4b,Pdzd2,Cdk5r1,Psd,Arhgap32,Syngap1,Farp1,Arfgap1,Gabra3,Syn3,Map1b,Ppfia2,Tsc1,Plekha5,Ctnna2,Gabbr1,Mecp2,Cask,Map4,Pkp4,Apc2,Cnksr2,Bsn,Map1a,Map2,Homer2,Atp2b1,Arhgef2,Sptbn1,Stx12,Adgrl2,Dlgap2,Dclk1,Wasf1,Glrb,Nf1,Ppp1r9b,Pacsin1,Grm5,Myo5a,Nos1ap,Dbn1,Htt,Ank3,Begain,Eif3a,Strn,Eps8,Mpp2,Sos1,Ap3d1,Srgap2,Eif4b,Rps6kc1,Strn4,Kif1a,Ank2,Lzts3,Kcnb1,D…
GO:0099572	postsynaptic specialization	2.24926e-10	Akap5,Sorbs2,Kcnd3,Dlg5,Dlg2,Sipa1l1,Pde4b,Pdzd2,Cdk5r1,Psd,Arhgap32,Syngap1,Arfgap1,Gabra3,Syn3,Map1b,Tsc1,Plekha5,Ctnna2,Cask,Map4,Pkp4,Cnksr2,Bsn,Map1a,Map2,Homer2,Arhgef2,Sptbn1,Dlgap2,Dclk1,Nf1,Ppp1r9b,Pacsin1,Grm5,Dbn1,Eif3a,Strn,Eps8,Mpp2,Sos1,Srgap2,Rps6kc1,Ank2,Lzts3,Dlgap4,Tsc2,Erc1,Synpo,Camk2a,Mapt,Epb41l3,Gphn,Map3k7,Erc2,Samd14,Grip1,Tanc2,Chrm3,Plppr4,Dlgap1,Gabrb2,Scrib,Gabrb3,Sha…
GO:0042995	cell projection	3.91671e-10	Lmtk2,Akap5,Sorbs2,Kcnd3,Dlg5,Dlg2,Sipa1l1,Pde4b,Pam,Pdzd2,Cdk5r1,Psd,Cacna1a,Ephb6,Arhgap32,Syngap1,Farp1,Sh3kbp1,Mark4,Tiam2,Numa1,Gabra3,Hcn2,Daam1,Pacsin2,Map1b,Ppfia2,Tsc1,Wwc1,Ace2,Dicer1,Cnr1,Dync1i2,Gprin1,Tenm3,Ctnna2,Gabbr1,Fgd1,Stmn1,Cask,Enkd1,Map4,Ephb1,Cnksr2,Dlc1,Bsn,Fkbp15,Map1a,Map2,Homer2,Atp2b1,Sort1,Arhgef2,Sybu,Rangap1,Sptbn1,Mycbp2,Adgrl2,Dlgap2,Cacna1b,Dclk1,Wasf1,Glrb,Ar,N…
GO:0120025	plasma membrane bounded cell projection	2.09816e-09	Lmtk2,Akap5,Sorbs2,Kcnd3,Dlg5,Dlg2,Sipa1l1,Pde4b,Pam,Pdzd2,Cdk5r1,Psd,Cacna1a,Ephb6,Arhgap32,Syngap1,Farp1,Sh3kbp1,Mark4,Tiam2,Numa1,Gabra3,Hcn2,Daam1,Pacsin2,Map1b,Ppfia2,Tsc1,Wwc1,Ace2,Dicer1,Cnr1,Dync1i2,Gprin1,Ctnna2,Gabbr1,Fgd1,Stmn1,Cask,Enkd1,Map4,Ephb1,Cnksr2,Dlc1,Bsn,Fkbp15,Map1a,Map2,Homer2,Atp2b1,Sort1,Arhgef2,Sybu,Rangap1,Sptbn1,Mycbp2,Adgrl2,Dlgap2,Cacna1b,Wasf1,Glrb,Ar,Nf1,Ppp1r9b,J…
GO:0014069	postsynaptic density	5.06506e-09	Akap5,Sorbs2,Kcnd3,Dlg5,Dlg2,Sipa1l1,Pde4b,Pdzd2,Cdk5r1,Psd,Arhgap32,Syngap1,Arfgap1,Syn3,Map1b,Tsc1,Plekha5,Ctnna2,Cask,Map4,Pkp4,Cnksr2,Bsn,Map1a,Map2,Homer2,Arhgef2,Sptbn1,Dlgap2,Dclk1,Nf1,Ppp1r9b,Pacsin1,Grm5,Dbn1,Eif3a,Strn,Eps8,Mpp2,Sos1,Srgap2,Rps6kc1,Ank2,Lzts3,Tsc2,Erc1,Synpo,Camk2a,Mapt,Epb41l3,Gphn,Map3k7,Erc2,Samd14,Grip1,Tanc2,Chrm3,Plppr4,Dlgap1,Scrib,Shank2,Dnajc6,Epb41,Add2,Pclo,C…
GO:0032279	asymmetric synapse	1.52239e-08	Akap5,Sorbs2,Kcnd3,Dlg5,Dlg2,Sipa1l1,Pde4b,Pdzd2,Cdk5r1,Psd,Arhgap32,Syngap1,Arfgap1,Syn3,Map1b,Tsc1,Plekha5,Ctnna2,Cask,Map4,Pkp4,Cnksr2,Bsn,Map1a,Map2,Homer2,Arhgef2,Sptbn1,Dlgap2,Dclk1,Nf1,Ppp1r9b,Pacsin1,Grm5,Dbn1,Eif3a,Strn,Eps8,Mpp2,Sos1,Srgap2,Rps6kc1,Ank2,Lzts3,Tsc2,Erc1,Synpo,Camk2a,Mapt,Epb41l3,Gphn,Map3k7,Erc2,Samd14,Grip1,Tanc2,Chrm3,Plppr4,Dlgap1,Scrib,Shank2,Dnajc6,Epb41,Add2,Pclo,C…
GO:0030425	dendrite	2.44221e-08	Akap5,Sorbs2,Kcnd3,Dlg2,Sipa1l1,Pde4b,Cdk5r1,Psd,Cacna1a,Arhgap32,Syngap1,Farp1,Mark4,Numa1,Gabra3,Hcn2,Map1b,Ppfia2,Dicer1,Gabbr1,Cask,Ephb1,Bsn,Map1a,Map2,Homer2,Atp2b1,Sort1,Arhgef2,Rangap1,Dlgap2,Cacna1b,Wasf1,Glrb,Ar,Nf1,Ppp1r9b,Dennd1a,Grm5,Myo5a,Dbn1,Htt,Ank3,Begain,Nsg2,Strn,Dyrk1a,Mpp2,Ybx1,Srgap2,Eif4b,Cobl,Gigyf2,Dmwd,Map1lc3b,Strn4,Dcx,Bptf,Kif1a,Syt7,Lzts3,Kcnb1,Dlgap4,Strn3,Zc3h14,S…
GO:0097447	dendritic tree	2.44221e-08	Akap5,Sorbs2,Kcnd3,Dlg2,Sipa1l1,Pde4b,Cdk5r1,Psd,Cacna1a,Arhgap32,Syngap1,Farp1,Mark4,Numa1,Gabra3,Hcn2,Map1b,Ppfia2,Dicer1,Gabbr1,Cask,Ephb1,Bsn,Map1a,Map2,Homer2,Atp2b1,Sort1,Arhgef2,Rangap1,Dlgap2,Cacna1b,Wasf1,Glrb,Ar,Nf1,Ppp1r9b,Dennd1a,Grm5,Myo5a,Dbn1,Htt,Ank3,Begain,Nsg2,Strn,Dyrk1a,Mpp2,Ybx1,Srgap2,Eif4b,Cobl,Gigyf2,Dmwd,Map1lc3b,Strn4,Dcx,Bptf,Kif1a,Syt7,Lzts3,Kcnb1,Dlgap4,Strn3,Zc3h14,S…
GO:0098984	neuron to neuron synapse	3.61117e-08	Akap5,Sorbs2,Kcnd3,Dlg5,Dlg2,Sipa1l1,Pde4b,Pdzd2,Cdk5r1,Psd,Arhgap32,Syngap1,Arfgap1,Syn3,Map1b,Tsc1,Plekha5,Ctnna2,Cask,Prkar1b,Map4,Pkp4,Cnksr2,Bsn,Map1a,Map2,Homer2,Arhgef2,Sptbn1,Dlgap2,Dclk1,Nf1,Ppp1r9b,Pacsin1,Grm5,Dbn1,Eif3a,Strn,Eps8,Mpp2,Sos1,Srgap2,Rps6kc1,Ank2,Syt7,Lzts3,Tsc2,Erc1,Synpo,Camk2a,Mapt,Epb41l3,Gphn,Map3k7,Erc2,Samd14,Grip1,Tanc2,Chrm3,Plppr4,Dlgap1,Scrib,Shank2,Dnajc6,Epb4…
GO:0036477	somatodendritic compartment	2.31194e-07	Lmtk2,Akap5,Sorbs2,Kcnd3,Dlg2,Sipa1l1,Pde4b,Pam,Cdk5r1,Psd,Cacna1a,Arhgap32,Syngap1,Farp1,Mark4,Tiam2,Numa1,Gabra3,Hcn2,Map1b,Ppfia2,Dicer1,Gabbr1,Cask,Ephb1,Cnksr2,Bsn,Map1a,Map2,Homer2,Atp2b1,Sort1,Arhgef2,Rangap1,Dlgap2,Cacna1b,Wasf1,Glrb,Ar,Nf1,Ppp1r9b,Dennd1a,Grm5,Myo5a,Dbn1,Htt,Ank3,Begain,Nsg2,Strn,Dyrk1a,Mpp2,Ybx1,Sos1,Optn,Srgap2,Eif4b,Cobl,Gigyf2,Dmwd,Map1lc3b,Strn4,Dcx,Bptf,Kif1a,Syt7,…
GO:0030424	axon	3.97412e-06	Lmtk2,Dlg2,Cdk5r1,Tiam2,Hcn2,Map1b,Ppfia2,Tsc1,Dicer1,Cnr1,Gprin1,Ctnna2,Gabbr1,Map4,Ephb1,Bsn,Fkbp15,Map1a,Map2,Sybu,Rangap1,Sptbn1,Mycbp2,Adgrl2,Cacna1b,Ar,Nf1,Ppp1r9b,Pacsin1,Ptprn2,Myo5a,Dbn1,Htt,Ank3,Eps8,Dyrk1a,Unc13a,Optn,Ap3d1,Cobl,Slc12a6,Map1lc3b,Dcx,Kif1a,Syt7,Kcnb1,Tnfrsf21,Ap3b2,Dctn2,Zc3h14,Camk2a,Mapt,Epb41l3,Hcn1,Atl1,Wdfy3,Erc2,Mbp,Tanc2,Dync1i1,Brsk1,Chrm3,Dab2ip,Afdn,Gabrb3,Git…
GO:0045202	synapse	1.30501e-05	Akap5,Sorbs2,Kcnd3,Dlg5,Dlg2,Sipa1l1,Pde4b,Pdzd2,Cdk5r1,Psd,Cacna1a,Arhgap32,Syngap1,Farp1,Sh3kbp1,Tiam2,Pdzrn3,Arfgap1,Gabra3,Syn3,Hcn2,Pacsin2,Map1b,Ppfia2,Tsc1,Cnr1,Plekha5,Ctnna2,Gabbr1,Mecp2,Cask,Prkar1b,Map4,Pkp4,Ephb1,Apc2,Cnksr2,Slc29a4,Bsn,Map1a,Map2,Cacnb1,Rtn3,Tmem163,Homer2,Atp2b1,Arhgef2,Sptbn1,Stx12,Adgrl2,Dlgap2,Cacna1b,Dclk1,Wasf1,Mctp1,Glrb,Nf1,Ppp1r9b,Dennd1a,Pacsin1,Ext1,Grm5,P…
GO:0031175	neuron projection development	8.06399e-05	Lmtk2,Akap5,Dlg5,Sipa1l1,Robo1,Abl2,Robo2,Apbb2,Cdk5r1,Sema6d,Psd,Cacna1a,Ephb6,Syngap1,Farp1,Pak6,Myo16,Tiam2,Map1b,Ppfia2,Herc1,Srcin1,Tsc1,Cnr1,Dync1i2,Top2b,Gprin1,Ctnna2,Mecp2,Mrtfa,Stmn1,Cask,Map4,Ephb1,Map1a,Map2,Mycbp2,Numbl,Dclk1,Wasf1,Nf1,Ppp1r9b,Pacsin1,Ext1,Dvl3,Gak,Dbn1,Spag9,Ank3,Strn,Ehd1,Unc13a,Srgap2,Enah,Rap1gap2,Triobp,Cobl,Dcx,Kif1a,Hecw1,Lzts3,Tnfrsf21,Nyap2,Camk2a,Mapt,Epb41…
GO:0048666	neuron development	0.000102112	Lmtk2,Akap5,Dlg5,Dlg2,Sipa1l1,Robo1,Abl2,Robo2,Apbb2,Cdk5r1,Sema6d,Psd,Cacna1a,Ephb6,Syngap1,Farp1,Pak6,Myo16,Tiam2,Map1b,Ppfia2,Herc1,Srcin1,Tsc1,Cnr1,Dync1i2,Top2b,Gprin1,Tenm3,Ctnna2,Mecp2,Mrtfa,Stmn1,Cask,Map4,Ephb1,Map1a,Map2,Mycbp2,Numbl,Dclk1,Wasf1,Nf1,Ppp1r9b,Pacsin1,Ext1,Dvl3,Gak,Dbn1,Spag9,Ank3,Strn,Ehd1,Unc13a,Srgap2,Enah,Rap1gap2,Triobp,Cobl,Dcx,Kif1a,Hecw1,Lzts3,Tnfrsf21,Nyap2,Camk2a…
GO:0030054	cell junction	0.000114614	Akap5,Sorbs2,Kcnd3,Dlg5,Dlg2,Sipa1l1,Nhs,Pde4b,Pdzd2,Afap1,Mtdh,Cdk5r1,Psd,Cacna1a,Arhgap32,Syngap1,Farp1,Pak6,Sh3kbp1,Tiam2,Pdzrn3,Arfgap1,Gabra3,Syn3,Hcn2,Pacsin2,Map1b,Ppfia2,Tsc1,Cnr1,Plekha5,Gab1,Ptprr,Ctnna2,Gabbr1,Mecp2,Slc9a1,Cask,Prkar1b,Map4,Pkp4,Ephb1,Apc2,Cnksr2,Slc29a4,Dlc1,Ccdc88c,Plec,Bsn,Map1a,Map2,Cacnb1,Rtn3,Tmem163,Homer2,Atp2b1,Arhgef2,Sptbn1,Stx12,Adgrl2,Dlgap2,Cacna1b,Dclk1,…
GO:0016358	dendrite development	0.000118819	Akap5,Dlg5,Sipa1l1,Cdk5r1,Cacna1a,Syngap1,Farp1,Map1b,Ppfia2,Srcin1,Ctnna2,Mecp2,Cask,Ephb1,Map1a,Map2,Numbl,Dclk1,Ppp1r9b,Pacsin1,Dbn1,Strn,Srgap2,Cobl,Dcx,Kif1a,Hecw1,Lzts3,Camk2a,Grip1,Tanc2,Dab2ip,Afdn,Shank2,Git1,Zmynd8,Fmr1,Uba6,Ctnnd2,Camk1d,Mink1,Bcl11a,Cdkl5,Camk2b,Spire1,Ppp3ca,Hdac6,Epha4,Nedd4l,Grin3a,Znf365,Hnrnpk
GO:0007399	nervous system development	0.00041613	Lmtk2,Akap5,Dlg5,Dlg2,Sipa1l1,Robo1,Pam,Abl2,Robo2,Apbb2,Nav2,Cdk5r1,Sema6d,Psd,Cacna1a,Ephb6,Syngap1,Farp1,Pak6,Myo16,Mark4,Tiam2,Map1b,Ppfia2,Herc1,Srcin1,Tsc1,Cnr1,Dync1i2,Top2b,Gprin1,Nfix,Tenm3,Ctnna2,Mecp2,Mrtfa,Stmn1,Cask,Map4,Macroh2a2,Ephb1,Bsn,Map1a,Map2,Atp2b1,Arhgef2,Sybu,Mecom,Mycbp2,Adgrl2,Numbl,Dclk1,Wasf1,Glrb,Nf1,Ppp1r9b,Pacsin1,Ext1,Grm5,Myo5a,Dvl3,Gak,Dbn1,Spag9,Ank3,Hdac9,Strn…
GO:0048699	generation of neurons	0.000651862	Lmtk2,Akap5,Dlg5,Dlg2,Sipa1l1,Robo1,Abl2,Robo2,Apbb2,Cdk5r1,Sema6d,Psd,Cacna1a,Ephb6,Syngap1,Farp1,Pak6,Myo16,Tiam2,Map1b,Ppfia2,Herc1,Srcin1,Tsc1,Cnr1,Dync1i2,Top2b,Gprin1,Nfix,Tenm3,Ctnna2,Mecp2,Mrtfa,Stmn1,Cask,Map4,Ephb1,Map1a,Map2,Arhgef2,Mycbp2,Numbl,Dclk1,Wasf1,Nf1,Ppp1r9b,Pacsin1,Ext1,Grm5,Dvl3,Gak,Dbn1,Spag9,Ank3,Hdac9,Strn,Ehd1,Unc13a,Srgap2,Enah,Rap1gap2,Triobp,Cobl,Gigyf2,Dcx,Kif1a,Ze…
GO:0030182	neuron differentiation	0.00138676	Lmtk2,Akap5,Dlg5,Dlg2,Sipa1l1,Robo1,Abl2,Robo2,Apbb2,Cdk5r1,Sema6d,Psd,Cacna1a,Ephb6,Syngap1,Farp1,Pak6,Myo16,Tiam2,Map1b,Ppfia2,Herc1,Srcin1,Tsc1,Cnr1,Dync1i2,Top2b,Gprin1,Nfix,Tenm3,Ctnna2,Mecp2,Mrtfa,Stmn1,Cask,Map4,Ephb1,Map1a,Map2,Arhgef2,Mycbp2,Numbl,Dclk1,Wasf1,Nf1,Ppp1r9b,Pacsin1,Ext1,Dvl3,Gak,Dbn1,Spag9,Ank3,Hdac9,Strn,Ehd1,Unc13a,Srgap2,Enah,Rap1gap2,Triobp,Cobl,Gigyf2,Dcx,Kif1a,Zeb1,He…
GO:0043025	neuronal cell body	0.0033953	Lmtk2,Akap5,Sorbs2,Kcnd3,Dlg2,Sipa1l1,Pam,Cdk5r1,Cacna1a,Tiam2,Numa1,Hcn2,Map1b,Gabbr1,Cask,Cnksr2,Bsn,Map1a,Map2,Homer2,Atp2b1,Sort1,Arhgef2,Cacna1b,Ppp1r9b,Dennd1a,Myo5a,Dbn1,Begain,Strn,Ybx1,Sos1,Optn,Eif4b,Cobl,Gigyf2,Dmwd,Map1lc3b,Dcx,Kif1a,Syt7,Kcnb1,Dlgap4,Strn3,Synpo,Camk2a,Mapt,Gphn,Hcn1,Shroom2,Wdfy3,Gtf2i,Erc2,Mbp,Grip1,Dab2ip,Fus,Shank2,Hcn3,Prkaa2,Camk2d,Fmr1,Rasgrf1,Pclo,Ctnnd2,Arhg…
GO:0022008	neurogenesis	0.00351672	Lmtk2,Akap5,Dlg5,Dlg2,Sipa1l1,Robo1,Abl2,Robo2,Apbb2,Nav2,Cdk5r1,Sema6d,Psd,Cacna1a,Ephb6,Syngap1,Farp1,Pak6,Myo16,Tiam2,Map1b,Ppfia2,Herc1,Srcin1,Tsc1,Cnr1,Dync1i2,Top2b,Gprin1,Nfix,Tenm3,Ctnna2,Mecp2,Mrtfa,Stmn1,Cask,Map4,Ephb1,Map1a,Map2,Arhgef2,Mycbp2,Numbl,Dclk1,Wasf1,Nf1,Ppp1r9b,Pacsin1,Ext1,Grm5,Dvl3,Gak,Dbn1,Spag9,Ank3,Hdac9,Strn,Ehd1,Unc13a,Srgap2,Enah,Rap1gap2,Triobp,Cobl,Tacc2,Gigyf2,D…
GO:0050808	synapse organization	0.00379475	Sorbs2,Dlg5,Dlg2,Sipa1l1,Cdk5r1,Cacna1a,Syngap1,Farp1,Pdzrn3,Map1b,Ppfia2,Srcin1,Tsc1,Ctnna2,Mecp2,Cask,Ephb1,Cnksr2,Bsn,Cacnb1,Sybu,Adgrl2,Wasf1,Glrb,Grm5,Myo5a,Nos1ap,Dbn1,Ank3,Mpp2,Unc13a,Kif1a,Lzts3,Erc1,Synpo,Mapt,Gphn,Erc2,Tanc2,Dab2ip,Afdn,Dlgap1,Gabrb2,Cacnb2,Gabrb3,Shank2,Git1,Zmynd8,Add2,Pclo,Pls3,Ctnnd2,Arhgef7,Cabp1,Cdkl5,Camk2b,Actg1,Hdac6,Epha4,Adgrl3,Oxtr,Atp2b2,Znf365,Ophn1,Hnrnpk…
GO:0043087	regulation of GTPase activity	0.00412359	Agap2,Sipa1l1,Arhgap32,Syngap1,Tiam2,Arfgap1,Tsc1,Fgd1,Rrp1b,Stmn1,Pkp4,Dlc1,Ripor1,Rangap1,Sgsm3,Nf1,Dennd1a,Ptprn2,Dvl3,Rabgap1,Evi5l,Arhgef12,Srgap2,Rap1gap2,Ranbp2,Mapre2,Tsc2,Arhgef11,Ralgapa1,Rabgap1l,Sgsm1,Dab2ip,Afdn,Scrib,Git2,Rasa3,Grhl3,Rgs7,Git1,Agap1,Sipa1l3,Tbc1d10a,Gapvd1,Gpsm1,Arfgef1,Rasgrf1,Tbc1d22b,Arhgef7,Eif2b4,Rab3gap1,Arhgap23,Mtss2,Ric1,Cdkl5,Arhgef26,Rab11fip2,Arhgap1,Rip…
GO:0060996	dendritic spine development	0.0122177	Dlg5,Sipa1l1,Cdk5r1,Ppfia2,Srcin1,Mecp2,Cask,Ephb1,Dbn1,Srgap2,Kif1a,Lzts3,Camk2a,Tanc2,Afdn,Shank2,Git1,Zmynd8,Fmr1,Uba6,Ctnnd2,Cdkl5,Camk2b,Spire1,Hdac6,Epha4,Grin3a,Znf365,Hnrnpk
GO:0030030	cell projection organization	0.0139765	Lmtk2,Akap5,Dlg5,Sipa1l1,Robo1,Abl2,Robo2,Apbb2,Cdk5r1,Sema6d,Psd,Cacna1a,Ephb6,Syngap1,Farp1,Pak6,Myo16,Mark4,Tiam2,Pacsin2,Map1b,Ppfia2,Herc1,Srcin1,Tsc1,Cnr1,Ablim2,Dync1i2,Top2b,Gprin1,Ctnna2,Mecp2,Fgd1,Mrtfa,Stmn1,Cask,Map4,Ephb1,Map1a,Map2,Mycbp2,Rfx3,Numbl,Dclk1,Wasf1,Nf1,Ppp1r9b,Pacsin1,Ext1,Dvl3,Gak,Dbn1,Spag9,Htt,Ank3,Apc,Fgd4,Strn,Eps8,Evi5l,Ccp110,Ehd1,Unc13a,Srgap2,Enah,Rap1gap2,Trio…
GO:0120036	plasma membrane bounded cell projection organization	0.0154264	Lmtk2,Akap5,Dlg5,Sipa1l1,Robo1,Abl2,Robo2,Apbb2,Cdk5r1,Sema6d,Psd,Cacna1a,Ephb6,Syngap1,Farp1,Pak6,Myo16,Mark4,Tiam2,Map1b,Ppfia2,Herc1,Srcin1,Tsc1,Cnr1,Ablim2,Dync1i2,Top2b,Gprin1,Ctnna2,Mecp2,Fgd1,Mrtfa,Stmn1,Cask,Map4,Ephb1,Map1a,Map2,Mycbp2,Rfx3,Numbl,Dclk1,Wasf1,Nf1,Ppp1r9b,Pacsin1,Ext1,Dvl3,Gak,Dbn1,Spag9,Htt,Ank3,Apc,Fgd4,Strn,Eps8,Evi5l,Ccp110,Ehd1,Unc13a,Srgap2,Enah,Rap1gap2,Triobp,Nek1,…
GO:0007010	cytoskeleton organization	0.017215	Sorbs2,Agap2,Sipa1l1,Pam,Fsd1,Afap1,Cdk5r1,Farp1,Ppm1e,Sh3kbp1,Mical2,Mark4,Numa1,Arfgef3,Daam1,Pacsin2,Map1b,Spryd3,Tsc1,Ablim2,Gab1,Ctnna2,Mecp2,Fgd1,Mrtfa,Stmn1,Map4,Dlc1,Ccdc88c,Plec,Map1a,Map2,Arhgef2,Sptbn1,Mycbp2,Fmnl2,Wasf1,Mast3,Nf1,Ppp1r9b,Pacsin1,Myo5a,Nos1ap,Dbn1,Htt,Ank3,Apc,Fgd4,Hsph1,Son,Map7d1,Lmna,Eps8,Ccp110,Dyrk1a,Elmo2,Smtnl2,Frmd3,Srgap2,Enah,Lsm14a,Triobp,Strip1,Cobl,Tacc2,D…
GO:0043547	positive regulation of GTPase activity	0.0211721	Agap2,Sipa1l1,Arhgap32,Syngap1,Tiam2,Arfgap1,Tsc1,Pkp4,Dlc1,Rangap1,Sgsm3,Nf1,Dennd1a,Dvl3,Rabgap1,Evi5l,Arhgef12,Srgap2,Rap1gap2,Ranbp2,Mapre2,Tsc2,Arhgef11,Ralgapa1,Rabgap1l,Sgsm1,Dab2ip,Afdn,Scrib,Git2,Rasa3,Grhl3,Rgs7,Git1,Agap1,Sipa1l3,Tbc1d10a,Gapvd1,Rasgrf1,Tbc1d22b,Arhgef7,Rab3gap1,Arhgap23,Mtss2,Ric1,Cdkl5,Arhgef26,Rab11fip2,Arhgap1,Epha4,Rasgrp2,Ophn1
GO:0099536	synaptic signaling	0.024548	Akap5,Sorbs2,Dlg2,Sipa1l1,Cdk5r1,Cacna1a,Syngap1,Farp1,Gabra3,Syn3,Pacsin2,Map1b,Ppfia2,Cnr1,Gabbr1,Mecp2,Cask,Prkar1b,Ephb1,Map1a,Cacnb1,Sybu,Dlgap2,Cacna1b,Mctp1,Glrb,Nf1,Ppp1r9b,Ext1,Grm5,Ptprn2,Myo5a,Dbn1,Begain,Mpp2,Unc13a,Slc12a6,Syt7,Kcnb1,Dlgap4,Erc1,Synpo,Camk2a,Mapt,Erc2,Rela,Brsk1,Iqsec2,Chrm3,Afdn,Dlgap1,Gabrb2,Scrib,Cacnb2,Gabrb3,Git2,Shank2,Git1,Zmynd8,Dmxl2,Rasgrf1,Pclo,Apba1,Htr2a…
GO:0051234	establishment of localization	0.0258854	Srsf7,Lmtk2,Akap5,Kcnd3,Dlg2,Agap2,Kcnh7,Ywhab,Pde4b,Pam,Cdk5r1,Cacna1a,Sh3kbp1,Kcnq5,Atg2b,Numa1,Arfgap1,Gabra3,Syn3,Hcn2,Osbpl8,Pacsin2,Map1b,Ppfia2,Reps1,Tsc1,Ace2,Cnr1,Dync1i2,Srebf1,Ice1,H13,Gabbr1,Mecp2,Snx16,Slc9a1,Cask,Prkar1b,Map4,Fyttd1,Macroh2a2,Slc29a4,Ccdc88c,Bsn,Fkbp15,Map1a,Map2,Cacnb1,Ripor1,Rtn3,Tmem163,Homer2,Atp2b1,Sort1,Arhgef2,Sybu,Ano8,Rangap1,Nipal3,Pgrmc2,Sptbn1,Stx12,Gram…
GO:0098978	glutamatergic synapse	0.0262821	Akap5,Dlg2,Sipa1l1,Cacna1a,Syngap1,Farp1,Syn3,Pacsin2,Ppfia2,Cnr1,Plekha5,Gabbr1,Mecp2,Prkar1b,Ephb1,Cnksr2,Bsn,Homer2,Atp2b1,Arhgef2,Sptbn1,Adgrl2,Dlgap2,Cacna1b,Pacsin1,Grm5,Myo5a,Nos1ap,Dvl3,Dbn1,Begain,Eps8,Mpp2,Unc13a,Ap3d1,Syt7,Dlgap4,Erc1,Prkar1a,Synpo,Camk2a,Erc2,Grip1,Rela,Tanc2,Chrm3,Plppr4,Dlgap1,Scrib,Rgs7,Shank2,Git1,Amph,Add2,Pclo,Apba1,Htr2a,Cabp1,Cdkl5,Rtn4,Camk2b,Ppp3ca,Scn2a,Eph…
GO:0051641	cellular localization	0.0292909	Lmtk2,Akap5,Sorbs2,Kcnd3,Dlg2,Agap2,Ywhab,Cdk5r1,Cacna1a,Syngap1,Mark4,Numa1,Syn3,Osbpl8,Pacsin2,Map1b,Ppfia2,Reps1,Tsc1,Cnr1,Dync1i2,Srebf1,Ice1,H13,Kat7,Mecp2,Snx16,Cask,Vcpip1,Prkar1b,Map4,Fyttd1,Macroh2a2,Slc29a4,Ccdc88c,Bsn,Map1a,Map2,Cacnb1,Ripor1,Wipi2,Sort1,Arhgef2,Sybu,Rangap1,Sptbn1,Stx12,Cacna1b,Dclk1,Rab11fip5,Wasf1,Mctp1,Glrb,Rtn2,Ar,Sgsm3,Nf1,Ppp1r9b,Dennd1a,Pacsin1,Ptprn2,Myo5a,Nos…
GO:0099537	trans-synaptic signaling	0.0303791	Akap5,Dlg2,Sipa1l1,Cacna1a,Syngap1,Farp1,Gabra3,Syn3,Pacsin2,Map1b,Ppfia2,Cnr1,Gabbr1,Mecp2,Cask,Prkar1b,Ephb1,Map1a,Cacnb1,Sybu,Dlgap2,Cacna1b,Mctp1,Glrb,Nf1,Ppp1r9b,Ext1,Grm5,Ptprn2,Myo5a,Dbn1,Begain,Mpp2,Unc13a,Slc12a6,Syt7,Kcnb1,Dlgap4,Erc1,Synpo,Camk2a,Mapt,Erc2,Brsk1,Iqsec2,Chrm3,Afdn,Dlgap1,Gabrb2,Scrib,Cacnb2,Gabrb3,Git2,Shank2,Git1,Zmynd8,Dmxl2,Rasgrf1,Pclo,Apba1,Htr2a,Rab3gap1,Mink1,Cam…
GO:0031256	leading edge membrane	0.0316534	Akap5,Psd,Gabra3,Hcn2,Pacsin2,Wwc1,Gabbr1,Dlc1,Map2,Atp2b1,Arhgef2,Sptbn1,Ppp1r9b,Jcad,Pacsin1,Apc,Eps8,Mpp2,Kcnb1,Mapt,Epb41l3,Hcn1,Amph,Mtss2,Cdkl5,Mapk8ip3,Ripor2,Psd3,Gabra5,Rasgrp2,Gabra2
GO:0007268	chemical synaptic transmission	0.0336818	Akap5,Dlg2,Sipa1l1,Cacna1a,Syngap1,Gabra3,Syn3,Pacsin2,Map1b,Ppfia2,Cnr1,Gabbr1,Mecp2,Cask,Prkar1b,Ephb1,Map1a,Cacnb1,Sybu,Dlgap2,Cacna1b,Mctp1,Glrb,Nf1,Ppp1r9b,Ext1,Grm5,Ptprn2,Myo5a,Dbn1,Begain,Mpp2,Unc13a,Slc12a6,Syt7,Kcnb1,Dlgap4,Erc1,Synpo,Camk2a,Mapt,Erc2,Brsk1,Iqsec2,Chrm3,Afdn,Dlgap1,Gabrb2,Scrib,Cacnb2,Gabrb3,Git2,Shank2,Git1,Zmynd8,Dmxl2,Rasgrf1,Pclo,Apba1,Htr2a,Rab3gap1,Mink1,Camk2b,Pp…
GO:0098916	anterograde trans-synaptic signaling	0.0336818	Akap5,Dlg2,Sipa1l1,Cacna1a,Syngap1,Gabra3,Syn3,Pacsin2,Map1b,Ppfia2,Cnr1,Gabbr1,Mecp2,Cask,Prkar1b,Ephb1,Map1a,Cacnb1,Sybu,Dlgap2,Cacna1b,Mctp1,Glrb,Nf1,Ppp1r9b,Ext1,Grm5,Ptprn2,Myo5a,Dbn1,Begain,Mpp2,Unc13a,Slc12a6,Syt7,Kcnb1,Dlgap4,Erc1,Synpo,Camk2a,Mapt,Erc2,Brsk1,Iqsec2,Chrm3,Afdn,Dlgap1,Gabrb2,Scrib,Cacnb2,Gabrb3,Git2,Shank2,Git1,Zmynd8,Dmxl2,Rasgrf1,Pclo,Apba1,Htr2a,Rab3gap1,Mink1,Camk2b,Pp…
GO:0051056	regulation of small GTPase mediated signal transduction	0.0349666	Sipa1l1,Robo1,Psd,Syngap1,Arfgap1,Arfgef3,Stmn1,Dlc1,Ripor1,Arhgef2,Sgsm3,Nf1,Dennd1a,Eps8,Sos1,Rap1gap2,Mapre2,Tsc2,Ralgapa1,Iqsec2,Dab2ip,Prag1,Rasa3,Git1,Sipa1l3,Camk2d,Dennd4a,Arfgef1,Rasgrf1,Rab3gap1,Rtn4,Ripor2,Psd3,Ophn1,Scai,Ogt
GO:0006810	transport	0.0408919	Srsf7,Lmtk2,Akap5,Kcnd3,Dlg2,Agap2,Kcnh7,Ywhab,Pde4b,Pam,Cdk5r1,Cacna1a,Sh3kbp1,Kcnq5,Atg2b,Numa1,Arfgap1,Gabra3,Syn3,Hcn2,Osbpl8,Pacsin2,Map1b,Ppfia2,Reps1,Tsc1,Ace2,Cnr1,Dync1i2,Srebf1,Ice1,H13,Gabbr1,Mecp2,Snx16,Slc9a1,Cask,Prkar1b,Fyttd1,Slc29a4,Ccdc88c,Bsn,Fkbp15,Map1a,Map2,Cacnb1,Ripor1,Rtn3,Tmem163,Homer2,Atp2b1,Sort1,Sybu,Ano8,Rangap1,Nipal3,Pgrmc2,Sptbn1,Stx12,Gramd1a,Clcn6,Rfx3,Cacna1b,…
GO:0051179	localization	0.0481332	Srsf7,Lmtk2,Akap5,Sorbs2,Kcnd3,Dlg5,Dlg2,Agap2,Kcnh7,Ywhab,Pde4b,Robo1,Pam,Apbb2,Cdk5r1,Sema6d,Cacna1a,Syngap1,Sh3kbp1,Kcnq5,Atg2b,Mark4,Numa1,Arfgap1,Gabra3,Syn3,Hcn2,Osbpl8,Pacsin2,Map1b,Ppfia2,Reps1,Srcin1,Tsc1,Wwc1,Ace2,Cnr1,Dync1i2,Srebf1,Top2b,Ice1,H13,Gab1,Ptprr,Kat7,Ctnna2,Gabbr1,Mecp2,Mrtfa,Snx16,Slc9a1,Stmn1,Cask,Vcpip1,Prkar1b,Map4,Fyttd1,Macroh2a2,Ephb1,Slc29a4,Dlc1,Ccdc88c,Bsn,Fkbp15…

## Sheet: Table S2G. TTX Cluster 3
GO.ID	Description	FDR	Genes
GO:0045202	synapse	2.2718e-13	Pclo,Bsn,Map1b,Shank2,Syngap1,Kcnb1,Maf1,Cacna1g,Dlgap1,Elfn1,Grin2a,Pdzd2,Epb41l3,Bin1,Rab1b,Grid1,Syn3,Farp1,Arhgap44,Sipa1l1,Dgkb,Sorcs3,Cadps,Sorbs2,Amph,Slc12a5,Crkl,Add2,Slc4a8,Pde4b,Cacnb1,Syn2,Prrt2,Dlg4,Map4,Plppr4,Dbn1,Sarm1,Npy,Syt10,Arhgef7,Prr12,Gria1,Slc16a7,Tprg1l,Kif3a,Sema4b,Add1,Ap3d1,Cbarp,Ifngr1,Cnr1,Kirrel3,Efnb1,Nptxr,Adam22,Grin2b,Ppp1r9a,Tnik,Stxbp5,Nptx1,Akap12,Dlgap2,Psd…
GO:0030054	cell junction	1.03648e-12	Pclo,Bsn,Map1b,Shank2,Syngap1,Kcnb1,Maf1,Cacna1g,Dlgap1,Elfn1,Grin2a,Pdzd2,Epb41l3,Bin1,Rab1b,Grid1,Syn3,Farp1,Arhgap44,Sipa1l1,Dgkb,Sorcs3,Cadps,Sorbs2,Amph,Slc12a5,Crkl,Add2,Mapre2,Slc4a8,Pde4b,Cacnb1,Syn2,Prrt2,Dlg4,Map4,Plppr4,Dbn1,Sarm1,Ssh2,Npy,Syt10,Arhgef7,Prr12,Gria1,Slc16a7,Tprg1l,Kif3a,Sema4b,Add1,Ap3d1,Cbarp,Ifngr1,Cnr1,Kirrel3,Efnb1,Nptxr,Adam22,Grin2b,Ppp1r9a,Tnik,Stxbp5,Nptx1,Akap1…
GO:0099572	postsynaptic specialization	3.10367e-11	Pclo,Bsn,Map1b,Shank2,Syngap1,Dlgap1,Grin2a,Pdzd2,Epb41l3,Grid1,Syn3,Arhgap44,Sipa1l1,Sorcs3,Sorbs2,Add2,Pde4b,Syn2,Prrt2,Dlg4,Map4,Plppr4,Dbn1,Prr12,Gria1,Slc16a7,Add1,Ifngr1,Adam22,Ppp1r9a,Tnik,Dlgap2,Ptk2b,Bcr,Samd14,Epb41,Grm5,Syt11,Exoc4,Dlgap3,Adcy8,Dnm1,Rgs14,Sh3gl3,Palm,Capzb,Syn1,Iqsec1,Shank1,Camk2a,Akap5,Cacna1c,Rtn4,Dnajc6,Map2,Dlg2,Shank3,Dcc,Kcnd3,Arhgap32,Dagla,Dlg3,Ctnna2,Psd3,Prk…
GO:0098794	postsynapse	3.91071e-11	Pclo,Bsn,Map1b,Shank2,Syngap1,Kcnb1,Dlgap1,Grin2a,Pdzd2,Epb41l3,Grid1,Syn3,Farp1,Arhgap44,Sipa1l1,Dgkb,Sorcs3,Sorbs2,Crkl,Add2,Pde4b,Syn2,Prrt2,Dlg4,Map4,Plppr4,Dbn1,Arhgef7,Prr12,Gria1,Slc16a7,Add1,Ap3d1,Ifngr1,Adam22,Grin2b,Ppp1r9a,Tnik,Dlgap2,Psd2,Ptk2b,Bcr,Samd14,Epb41,Slc6a17,Itsn1,Camkv,Grm5,Syt11,Ptk2,Exoc4,Dlgap3,Adcy8,Dnm1,Rgs14,Sh3gl3,Palm,Myh10,Elavl1,Capzb,Syn1,Iqsec1,Ank3,Shank1,Camk…
GO:0032279	asymmetric synapse	4.20696e-11	Pclo,Bsn,Map1b,Shank2,Syngap1,Dlgap1,Grin2a,Pdzd2,Epb41l3,Grid1,Syn3,Arhgap44,Sipa1l1,Sorcs3,Sorbs2,Add2,Slc4a8,Pde4b,Syn2,Prrt2,Dlg4,Map4,Plppr4,Dbn1,Prr12,Gria1,Slc16a7,Add1,Ifngr1,Adam22,Ppp1r9a,Tnik,Dlgap2,Ptk2b,Bcr,Samd14,Epb41,Grm5,Syt11,Exoc4,Dlgap3,Adcy8,Dnm1,Rgs14,Sh3gl3,Palm,Capzb,Syn1,Iqsec1,Shank1,Camk2a,Akap5,Cacna1c,Rtn4,Dnajc6,Map2,Dlg2,Shank3,Dcc,Kcnd3,Arhgap32,Dagla,Dlg3,Ctnna2,P…
GO:0014069	postsynaptic density	5.31631e-11	Pclo,Bsn,Map1b,Shank2,Syngap1,Dlgap1,Grin2a,Pdzd2,Epb41l3,Grid1,Syn3,Arhgap44,Sipa1l1,Sorcs3,Sorbs2,Add2,Pde4b,Syn2,Prrt2,Dlg4,Map4,Plppr4,Dbn1,Prr12,Gria1,Slc16a7,Add1,Ifngr1,Adam22,Ppp1r9a,Tnik,Dlgap2,Ptk2b,Bcr,Samd14,Epb41,Grm5,Syt11,Exoc4,Dlgap3,Adcy8,Dnm1,Rgs14,Sh3gl3,Palm,Capzb,Syn1,Iqsec1,Shank1,Camk2a,Akap5,Cacna1c,Rtn4,Dnajc6,Map2,Dlg2,Shank3,Dcc,Kcnd3,Arhgap32,Dagla,Dlg3,Ctnna2,Psd3,Prk…
GO:0098984	neuron to neuron synapse	6.11428e-11	Pclo,Bsn,Map1b,Shank2,Syngap1,Dlgap1,Grin2a,Pdzd2,Epb41l3,Grid1,Syn3,Arhgap44,Sipa1l1,Sorcs3,Sorbs2,Add2,Slc4a8,Pde4b,Syn2,Prrt2,Dlg4,Map4,Plppr4,Dbn1,Prr12,Gria1,Slc16a7,Add1,Ifngr1,Adam22,Ppp1r9a,Tnik,Stxbp5,Dlgap2,Ptk2b,Bcr,Samd14,Epb41,Grm5,Syt11,Prkar1b,Exoc4,Dlgap3,Adcy8,Dnm1,Rgs14,Sh3gl3,Palm,Capzb,Syn1,Iqsec1,Shank1,Camk2a,Akap5,Cacna1c,Rtn4,Dnajc6,Map2,Dlg2,Shank3,Dcc,Kcnd3,Arhgap32,Dagl…
GO:0043005	neuron projection	6.63003e-11	Pclo,Bsn,Map1b,Shank2,Rap1gap2,Inpp5j,Syngap1,Tmem266,Kcnb1,Maf1,Cacna1g,Elfn1,Mast1,Grin2a,Pdzd2,Epb41l3,Bin1,Nefm,Farp1,Arhgap44,Sipa1l1,Sorbs2,Adcy9,Amph,Slc12a5,Gprin1,Ap3b2,Slc4a8,Pde4b,Prrt2,Dlg4,Map4,Dbn1,Sarm1,Npy,Arhgef7,Prr12,Gria1,Tprg1l,Kif3a,Add1,Ap3d1,Cbarp,Ifngr1,Cnr1,Kirrel3,Adam22,Cacna1i,Ppp1r9a,Nptx1,Dlgap2,Psd2,Syt13,Ptk2b,Bcar1,Bcan,Syt5,Ndrg2,Brinp2,Brsk1,Bcr,Samd14,Septin3,…
GO:0098978	glutamatergic synapse	3.52392e-10	Pclo,Bsn,Shank2,Syngap1,Dlgap1,Grin2a,Bin1,Grid1,Syn3,Farp1,Arhgap44,Sipa1l1,Dgkb,Sorcs3,Cadps,Amph,Add2,Slc4a8,Syn2,Prrt2,Dlg4,Plppr4,Dbn1,Gria1,Slc16a7,Ap3d1,Cnr1,Efnb1,Nptxr,Adam22,Ppp1r9a,Tnik,Nptx1,Dlgap2,Psd2,Ptk2b,Bcan,Ndrg2,Bcr,Slc6a17,Itsn1,Camkv,Grm5,Prkar1b,Ptk2,Dlgap3,Adcy8,Dnm1,Rgs14,Sh3gl3,Cacnb4,Myh10,Elavl1,Iqsec1,Elavl4,Shank1,Camk2a,Akap5,Cacna1c,Rtn4,Dlg2,Shank3,Rap1a,Nos1ap,Ts…
GO:0097447	dendritic tree	8.71098e-10	Pclo,Bsn,Map1b,Shank2,Inpp5j,Syngap1,Tmem266,Kcnb1,Maf1,Cacna1g,Elfn1,Mast1,Grin2a,Bin1,Farp1,Arhgap44,Sipa1l1,Sorbs2,Adcy9,Slc12a5,Slc4a8,Pde4b,Prrt2,Dlg4,Dbn1,Sarm1,Gria1,Add1,Ifngr1,Kirrel3,Ppp1r9a,Dlgap2,Psd2,Ptk2b,Bcan,Brinp2,Bcr,Samd14,Rangap1,Itsn1,Prex1,Grm5,Syt11,Ptk2,Exoc4,Dlgap3,Dip2b,Adcy8,Dnm1,Rgs14,Palm,Myh10,Capzb,Brd1,Syn1,Elavl4,Ank3,Plk3,Shank1,Camk2a,Amfr,Akap5,Itpka,Cacna1c,Rt…
GO:0030425	dendrite	8.71098e-10	Pclo,Bsn,Map1b,Shank2,Inpp5j,Syngap1,Tmem266,Kcnb1,Maf1,Cacna1g,Elfn1,Mast1,Grin2a,Bin1,Farp1,Arhgap44,Sipa1l1,Sorbs2,Adcy9,Slc12a5,Slc4a8,Pde4b,Prrt2,Dlg4,Dbn1,Sarm1,Gria1,Add1,Ifngr1,Kirrel3,Ppp1r9a,Dlgap2,Psd2,Ptk2b,Bcan,Brinp2,Bcr,Samd14,Rangap1,Itsn1,Prex1,Grm5,Syt11,Ptk2,Exoc4,Dlgap3,Dip2b,Adcy8,Dnm1,Rgs14,Palm,Myh10,Capzb,Brd1,Syn1,Elavl4,Ank3,Plk3,Shank1,Camk2a,Amfr,Akap5,Itpka,Cacna1c,Rt…
GO:0042995	cell projection	1.43818e-09	Pclo,Cep126,Bsn,Map1b,Shank2,Rap1gap2,Inpp5j,Syngap1,Tmem266,Kcnb1,Maf1,Cacna1g,Elfn1,Mast1,Grin2a,Pdzd2,Epb41l3,Bin1,Nefm,Fgd4,Farp1,Arhgap44,Sipa1l1,Pitpnm3,Fmn2,Sorbs2,Adcy9,Amph,Slc12a5,Gprin1,Ap3b2,Slc4a8,Pde4b,Prrt2,Dlg4,Map4,Dbn1,Sarm1,Npy,Arhgef7,Prr12,Gria1,Tprg1l,Kif3a,Add1,Ap3d1,Cbarp,Ifngr1,Cnr1,Kirrel3,Adam22,Cacna1i,Ppp1r9a,Septin7,Nptx1,Trio,Cfap52,Dlgap2,Psd2,Syt13,Ptk2b,Bcar1,Bca…
GO:0120025	plasma membrane bounded cell projection	5.43998e-08	Pclo,Cep126,Bsn,Map1b,Shank2,Rap1gap2,Inpp5j,Syngap1,Tmem266,Kcnb1,Maf1,Cacna1g,Elfn1,Mast1,Grin2a,Pdzd2,Epb41l3,Bin1,Nefm,Fgd4,Farp1,Arhgap44,Sipa1l1,Fmn2,Sorbs2,Adcy9,Amph,Slc12a5,Gprin1,Ap3b2,Slc4a8,Pde4b,Prrt2,Dlg4,Map4,Dbn1,Sarm1,Npy,Arhgef7,Prr12,Gria1,Tprg1l,Kif3a,Add1,Ap3d1,Cbarp,Ifngr1,Cnr1,Kirrel3,Adam22,Cacna1i,Ppp1r9a,Septin7,Nptx1,Cfap52,Dlgap2,Psd2,Syt13,Ptk2b,Bcar1,Bcan,Syt5,Ndrg2,…
GO:0030424	axon	1.02412e-07	Pclo,Bsn,Map1b,Shank2,Inpp5j,Kcnb1,Maf1,Mast1,Grin2a,Epb41l3,Bin1,Nefm,Adcy9,Amph,Gprin1,Ap3b2,Slc4a8,Prrt2,Dlg4,Map4,Dbn1,Sarm1,Npy,Arhgef7,Gria1,Tprg1l,Kif3a,Ap3d1,Cbarp,Cnr1,Kirrel3,Adam22,Ppp1r9a,Syt13,Ptk2b,Bcar1,Bcan,Syt5,Ndrg2,Brsk1,Bcr,Stmn4,Rangap1,Itsn1,Prex1,Syt11,Exoc4,Cbl,Rab3a,Dip2b,Exoc3,Adcy8,Dnm1,Gsto1,Palm,Myh10,Syn1,Elavl4,Lmtk2,Tmod2,Stx1b,Ank3,Camk2a,Amfr,Hepacam,Dtna,Rtn4,Ma…
GO:0099536	synaptic signaling	4.13129e-07	Pclo,Map1b,Shank2,Syngap1,Kcnb1,Cacna1g,Dlgap1,Grin2a,Grid1,Syn3,Farp1,Sipa1l1,Dgkb,Sorcs3,Cadps,Sorbs2,Kat2a,Slc12a5,Crkl,Slc4a8,Cacnb1,Syn2,Prrt2,Dlg4,Dbn1,Syt10,Gria1,Tprg1l,Cnr1,Nptxr,Ppp1r9a,Stxbp5,Nptx1,Akap12,Dlgap2,Ptk2b,Syt5,Brsk1,Bcr,Grm5,Prkar1b,Ptk2,Exoc4,Rab3a,Dlgap3,Adcy8,Dnm1,Rgs14,Cacnb4,Syn1,Atp2a2,Elavl4,Tmod2,Stx1b,Shank1,Camk2a,Akap5,Dtna,Itpka,Cacna1c,Slc6a6,Dlg2,Shank3,Plcl2…
GO:0099537	trans-synaptic signaling	8.62918e-07	Pclo,Map1b,Shank2,Syngap1,Kcnb1,Cacna1g,Dlgap1,Grin2a,Grid1,Syn3,Farp1,Sipa1l1,Dgkb,Sorcs3,Cadps,Kat2a,Slc12a5,Slc4a8,Cacnb1,Syn2,Prrt2,Dlg4,Dbn1,Syt10,Gria1,Tprg1l,Cnr1,Nptxr,Ppp1r9a,Stxbp5,Nptx1,Akap12,Dlgap2,Ptk2b,Syt5,Brsk1,Bcr,Grm5,Prkar1b,Ptk2,Exoc4,Rab3a,Dlgap3,Adcy8,Dnm1,Rgs14,Cacnb4,Syn1,Atp2a2,Elavl4,Tmod2,Stx1b,Shank1,Camk2a,Akap5,Itpka,Cacna1c,Slc6a6,Dlg2,Shank3,Plcl2,Dcc,Stau2,Rap1a,…
GO:0036477	somatodendritic compartment	2.65359e-06	Pclo,Bsn,Map1b,Shank2,Inpp5j,Syngap1,Tmem266,Kcnb1,Maf1,Cacna1g,Elfn1,Mast1,Grin2a,Bin1,Farp1,Arhgap44,Sipa1l1,Sorbs2,Adcy9,Slc12a5,Slc4a8,Pde4b,Prrt2,Dlg4,Dbn1,Sarm1,Npy,Arhgef7,Gria1,Kif3a,Add1,Ifngr1,Kirrel3,Ppp1r9a,Akap12,Dlgap2,Psd2,Ptk2b,Bcan,Syt5,Brinp2,Bcr,Samd14,Rangap1,Itsn1,Prex1,Grm5,Syt11,Ptk2,Exoc4,Dlgap3,Dip2b,Adcy8,Dnm1,Rgs14,Palm,Myh10,Capzb,Brd1,Syn1,Gtf2i,Elavl4,Lmtk2,Ank3,Plk3…
GO:0007268	chemical synaptic transmission	3.10746e-06	Pclo,Map1b,Shank2,Syngap1,Kcnb1,Cacna1g,Dlgap1,Grin2a,Grid1,Syn3,Sipa1l1,Dgkb,Sorcs3,Cadps,Kat2a,Slc12a5,Slc4a8,Cacnb1,Syn2,Prrt2,Dlg4,Dbn1,Syt10,Gria1,Tprg1l,Cnr1,Nptxr,Ppp1r9a,Stxbp5,Nptx1,Akap12,Dlgap2,Ptk2b,Syt5,Brsk1,Bcr,Grm5,Prkar1b,Ptk2,Exoc4,Rab3a,Dlgap3,Adcy8,Dnm1,Rgs14,Cacnb4,Syn1,Atp2a2,Elavl4,Tmod2,Stx1b,Shank1,Camk2a,Akap5,Itpka,Cacna1c,Slc6a6,Dlg2,Shank3,Plcl2,Dcc,Stau2,Rap1a,Syne1,…
GO:0098916	anterograde trans-synaptic signaling	3.10746e-06	Pclo,Map1b,Shank2,Syngap1,Kcnb1,Cacna1g,Dlgap1,Grin2a,Grid1,Syn3,Sipa1l1,Dgkb,Sorcs3,Cadps,Kat2a,Slc12a5,Slc4a8,Cacnb1,Syn2,Prrt2,Dlg4,Dbn1,Syt10,Gria1,Tprg1l,Cnr1,Nptxr,Ppp1r9a,Stxbp5,Nptx1,Akap12,Dlgap2,Ptk2b,Syt5,Brsk1,Bcr,Grm5,Prkar1b,Ptk2,Exoc4,Rab3a,Dlgap3,Adcy8,Dnm1,Rgs14,Cacnb4,Syn1,Atp2a2,Elavl4,Tmod2,Stx1b,Shank1,Camk2a,Akap5,Itpka,Cacna1c,Slc6a6,Dlg2,Shank3,Plcl2,Dcc,Stau2,Rap1a,Syne1,…
GO:0048468	cell development	3.12412e-06	Map1b,Shank2,Rap1gap2,Inpp5j,Speg,Syngap1,Gprin3,Smpd3,Epb41l3,Bin1,Farp1,Arhgap44,Srcin1,Sipa1l1,Fmn2,Sorbs2,Jun,Slc12a5,Lamc1,Jmjd1c,Crkl,Gprin1,Chd5,Pdcd4,Dlg4,Camsap1,Map4,Plppr4,Plxna1,Dbn1,Sarm1,Npy,Fhl2,Fbxw7,Kif3a,Sema4b,Add1,Ifngr1,Cnr1,Kirrel3,Neb,Efnb1,Adam22,Ppp1r9a,Tnik,Stxbp5,Nptx1,Trio,Ptk2b,Bcar1,Cbfb,Bcan,Kidins220,Islr2,Brsk1,Samd14,Dock7,Hdgfl3,Stmn4,Ampd2,Itsn1,Naca,Prex1,Fry,…
GO:0071944	cell periphery	7.21501e-06	Pclo,Bsn,Map1b,Shank2,Rap1gap2,Inpp5j,Syngap1,Gprin3,Tmem266,Kcnb1,Maf1,Cacna1g,Dlgap1,Elfn1,Mast1,Grin2a,Smpd3,Pdzd2,Epb41l3,Nkd2,Bin1,Mphosph8,Grid1,Lrrfip1,Farp1,Arhgap44,Sipa1l1,Fmn2,Dgkb,Sorcs3,Sorbs2,Jun,Ralgps1,Pcdh11x,Elfn2,Adcy9,Amph,Spred1,Slc12a5,Rell2,Lamc1,S1pr1,Crkl,Ptpre,Gprin1,Cacna1e,Rif1,Mfsd6,Add2,Ranbp9,Slc4a8,Pde4b,Cacnb1,Syn2,Prrt2,Dlg4,Map4,Plppr4,Plxna1,Dbn1,Syt10,Arhgef7,…
GO:0043197	dendritic spine	2.06441e-05	Map1b,Shank2,Grin2a,Farp1,Arhgap44,Sipa1l1,Pde4b,Prrt2,Dlg4,Dbn1,Gria1,Add1,Ppp1r9a,Dlgap2,Ptk2b,Bcr,Itsn1,Grm5,Syt11,Ptk2,Dlgap3,Dnm1,Rgs14,Palm,Myh10,Capzb,Shank1,Camk2a,Akap5,Itpka,Shank3,Kcnd3,Arhgap32,Dagla,Syne1,Kcnn2,Shisa9,Abr,Gpm6a
REAC:R-MMU-6794361	Neurexins and neuroligins	2.4274e-05	Shank2,Dlgap1,Epb41l3,Dlg4,Dlgap2,Epb41,Grm5,Dlgap3,Epb41l2,Shank1,Dlg2,Shank3,Dlg3,Epb41l5,Dlgap4
GO:0031175	neuron projection development	3.16824e-05	Map1b,Shank2,Rap1gap2,Inpp5j,Syngap1,Gprin3,Epb41l3,Farp1,Arhgap44,Srcin1,Sipa1l1,Jun,Slc12a5,Crkl,Gprin1,Dlg4,Camsap1,Map4,Plppr4,Plxna1,Dbn1,Sarm1,Npy,Kif3a,Sema4b,Cnr1,Kirrel3,Efnb1,Ppp1r9a,Tnik,Stxbp5,Nptx1,Trio,Ptk2b,Bcan,Kidins220,Islr2,Brsk1,Samd14,Dock7,Hdgfl3,Stmn4,Itsn1,Prex1,Fry,Ptk2,Rab3a,Dip2b,Rims1,Abl2,Map2k2,Palm,Myh10,Capzb,Iqsec1,Elavl4,Lmtk2,Stx1b,Ank3,Shank1,Camk2a,Akap5,Zswim…
GO:0005886	plasma membrane	3.96718e-05	Bsn,Map1b,Shank2,Rap1gap2,Inpp5j,Syngap1,Gprin3,Tmem266,Kcnb1,Maf1,Cacna1g,Dlgap1,Mast1,Grin2a,Smpd3,Pdzd2,Epb41l3,Nkd2,Bin1,Mphosph8,Grid1,Lrrfip1,Farp1,Arhgap44,Sipa1l1,Fmn2,Dgkb,Sorcs3,Sorbs2,Jun,Ralgps1,Pcdh11x,Adcy9,Amph,Spred1,Slc12a5,Rell2,S1pr1,Crkl,Ptpre,Gprin1,Cacna1e,Rif1,Mfsd6,Add2,Ranbp9,Slc4a8,Pde4b,Cacnb1,Syn2,Prrt2,Dlg4,Map4,Plppr4,Plxna1,Dbn1,Syt10,Arhgef7,Sirpa,Gria1,Slc16a7,Xpc…
GO:0050804	modulation of chemical synaptic transmission	4.04501e-05	Map1b,Shank2,Syngap1,Kcnb1,Dlgap1,Grin2a,Grid1,Sipa1l1,Dgkb,Sorcs3,Kat2a,Slc4a8,Prrt2,Dlg4,Dbn1,Gria1,Tprg1l,Cnr1,Nptxr,Ppp1r9a,Stxbp5,Nptx1,Akap12,Dlgap2,Ptk2b,Brsk1,Bcr,Grm5,Prkar1b,Ptk2,Rab3a,Dlgap3,Adcy8,Dnm1,Rgs14,Cacnb4,Syn1,Atp2a2,Elavl4,Stx1b,Shank1,Camk2a,Akap5,Itpka,Slc6a6,Shank3,Plcl2,Dcc,Stau2,Rap1a,Syne1,Kcnn2,Prkcg,Shisa9,Abr,Dlgap4,Mctp1,Stau1
GO:0099177	regulation of trans-synaptic signaling	4.04501e-05	Map1b,Shank2,Syngap1,Kcnb1,Dlgap1,Grin2a,Grid1,Sipa1l1,Dgkb,Sorcs3,Kat2a,Slc4a8,Prrt2,Dlg4,Dbn1,Gria1,Tprg1l,Cnr1,Nptxr,Ppp1r9a,Stxbp5,Nptx1,Akap12,Dlgap2,Ptk2b,Brsk1,Bcr,Grm5,Prkar1b,Ptk2,Rab3a,Dlgap3,Adcy8,Dnm1,Rgs14,Cacnb4,Syn1,Atp2a2,Elavl4,Stx1b,Shank1,Camk2a,Akap5,Itpka,Slc6a6,Shank3,Plcl2,Dcc,Stau2,Rap1a,Syne1,Kcnn2,Prkcg,Shisa9,Abr,Dlgap4,Mctp1,Stau1
GO:0022008	neurogenesis	4.28133e-05	Map1b,Shank2,Rap1gap2,Inpp5j,Syngap1,Gprin3,Grin2a,Epb41l3,Bin1,Farp1,Arhgap44,Srcin1,Sipa1l1,Jun,Slc12a5,S1pr1,Crkl,Gprin1,Chd5,Dlg4,Camsap1,Map4,Plppr4,Plxna1,Dbn1,Sarm1,Npy,Srsf1,Arhgef7,Kif3a,Sema4b,Bmerb1,Ifngr1,Cnr1,Kirrel3,Efnb1,Adam22,Ppp1r9a,Tnik,Stxbp5,Nptx1,Trio,Ptk2b,Bcan,Kidins220,Snw1,Islr2,Brinp2,Brsk1,Samd14,Dock7,Hdgfl3,Stmn4,Itsn1,Prex1,Fry,Grm5,Ptk2,Exoc4,Rab3a,Dip2b,Rims1,Abl2…
GO:0044309	neuron spine	4.4065e-05	Map1b,Shank2,Grin2a,Farp1,Arhgap44,Sipa1l1,Pde4b,Prrt2,Dlg4,Dbn1,Gria1,Add1,Ppp1r9a,Dlgap2,Ptk2b,Bcr,Itsn1,Grm5,Syt11,Ptk2,Dlgap3,Dnm1,Rgs14,Palm,Myh10,Capzb,Shank1,Camk2a,Akap5,Itpka,Shank3,Kcnd3,Arhgap32,Dagla,Syne1,Kcnn2,Shisa9,Abr,Gpm6a
GO:0007010	cytoskeleton organization	5.64304e-05	Pclo,Cep126,Map1b,Inpp5j,Mast1,Epb41l3,Bin1,Mphosph8,Nefm,Tubb1,Fgd4,Mical2,Farp1,Arhgap44,Sipa1l1,Fmn2,Sorbs2,Tbck,Kat2a,S1pr1,Add2,Mapre2,Ranbp9,Camsap1,Map4,Dbn1,Ssh2,Arhgef7,Sirpa,Kif3a,Bmerb1,Add1,Son,Neb,Ppp1r9a,Limch1,Tnik,Gas2l1,Ptk2b,Bcar1,Raf1,Brsk1,Bcr,Samd14,Dock7,Hdgfl3,Epb41l4b,Stmn4,Epb41,Prex1,Ptk2,Apc,Ehbp1,Cdc42bpb,Eml1,Map7d1,Rictor,Rgs14,Ncor1,Palm,Carmil2,Myh10,Capzb,Epb41l4a…
GO:0007267	cell-cell signaling	0.000170833	Pclo,Map1b,Shank2,Syngap1,Kcnb1,Cacna1g,Dlgap1,Grin2a,Smpd3,Ndufaf2,Nkd2,Grid1,Syn3,Farp1,Sipa1l1,Dgkb,Sorcs3,Cadps,Sorbs2,Kat2a,Slc12a5,Crkl,Slc4a8,Cacnb1,Syn2,Prrt2,Dlg4,Dbn1,Syt10,Arhgef7,Hilpda,Gria1,Tprg1l,Chga,Cnr1,Nptxr,Oga,Ppp1r9a,Tnik,Stxbp5,Scg5,Nptx1,Akap12,Dlgap2,Syt13,Ptk2b,Syt5,Ndrg2,Raf1,Brsk1,Bcr,Itsn1,Grm5,Syt11,Prkar1b,Ptk2,Sidt2,Exoc4,Apc,Rab3a,Dlgap3,Adcy8,Dnm1,Senp2,Rgs14,Cac…
GO:0030029	actin filament-based process	0.000181632	Cacna1g,Epb41l3,Bin1,Mphosph8,Mical2,Farp1,Arhgap44,Sipa1l1,Fmn2,Sorbs2,Tbck,S1pr1,Add2,Pde4b,Dbn1,Ssh2,Arhgef7,Sirpa,Add1,Neb,Ppp1r9a,Limch1,Tnik,Gas2l1,Ptk2b,Bcar1,Bcr,Samd14,Epb41l4b,Epb41,Prex1,Ehbp1,Cdc42bpb,Rictor,Carmil2,Myh10,Capzb,Epb41l4a,Sh2b2,Atp2a2,Iqsec1,Epb41l1,Epb41l2,Marcks,Arhgef19,Magel2,Slc9a1,Tmod2,Nebl,Shank1,Sptb,Itpka,Cacna1c,Arfgef3,Fam171a1,Shank3,Hcn4,Ctnna1,Kcnd3,Pard3…
GO:0048666	neuron development	0.000207117	Map1b,Shank2,Rap1gap2,Inpp5j,Syngap1,Gprin3,Epb41l3,Farp1,Arhgap44,Srcin1,Sipa1l1,Jun,Slc12a5,Crkl,Gprin1,Dlg4,Camsap1,Map4,Plppr4,Plxna1,Dbn1,Sarm1,Npy,Kif3a,Sema4b,Cnr1,Kirrel3,Efnb1,Ppp1r9a,Tnik,Stxbp5,Nptx1,Trio,Ptk2b,Bcan,Kidins220,Islr2,Brsk1,Samd14,Dock7,Hdgfl3,Stmn4,Itsn1,Prex1,Fry,Ptk2,Rab3a,Dip2b,Rims1,Abl2,Map2k2,Palm,Myh10,Capzb,Syn1,Iqsec1,Elavl4,Lmtk2,Stx1b,Ank3,Shank1,Camk2a,Akap5,…
GO:0120036	plasma membrane bounded cell projection organization	0.00115478	Cep126,Map1b,Shank2,Rap1gap2,Inpp5j,Syngap1,Gprin3,Grin2a,Epb41l3,Fgd4,Farp1,Arhgap44,Srcin1,Sipa1l1,Jun,Slc12a5,S1pr1,Crkl,Gprin1,Dlg4,Camsap1,Map4,Plppr4,Plxna1,Dbn1,Sarm1,Npy,Arhgef7,Kif3a,Sema4b,Cnr1,Kirrel3,Efnb1,Ppp1r9a,Tnik,Stxbp5,Nptx1,Trio,Cfap52,Ptk2b,Bcan,Kidins220,Islr2,Brsk1,Samd14,Dock7,Hdgfl3,Stmn4,Ccdc28b,Itsn1,Prex1,Fry,Ptk2,Apc,Rab3a,Dip2b,Rims1,Abl2,Map2k2,Palm,Carmil2,Myh10,Ca…
GO:0048699	generation of neurons	0.00132566	Map1b,Shank2,Rap1gap2,Inpp5j,Syngap1,Gprin3,Epb41l3,Bin1,Farp1,Arhgap44,Srcin1,Sipa1l1,Jun,Slc12a5,S1pr1,Crkl,Gprin1,Chd5,Dlg4,Camsap1,Map4,Plppr4,Plxna1,Dbn1,Sarm1,Npy,Kif3a,Sema4b,Cnr1,Kirrel3,Efnb1,Ppp1r9a,Tnik,Stxbp5,Nptx1,Trio,Ptk2b,Bcan,Kidins220,Islr2,Brinp2,Brsk1,Samd14,Dock7,Hdgfl3,Stmn4,Itsn1,Prex1,Fry,Grm5,Ptk2,Rab3a,Dip2b,Rims1,Abl2,Eml1,Map2k2,Rgs14,Sh3gl3,Nfix,Palm,Myh10,Capzb,Syn1,…
GO:0030030	cell projection organization	0.0015157	Cep126,Map1b,Shank2,Rap1gap2,Inpp5j,Syngap1,Gprin3,Grin2a,Epb41l3,Fgd4,Farp1,Arhgap44,Srcin1,Sipa1l1,Jun,Kat2a,Slc12a5,S1pr1,Crkl,Gprin1,Dlg4,Camsap1,Map4,Plppr4,Plxna1,Dbn1,Sarm1,Npy,Arhgef7,Kif3a,Sema4b,Cnr1,Kirrel3,Efnb1,Ppp1r9a,Tnik,Stxbp5,Nptx1,Trio,Cfap52,Ptk2b,Bcan,Kidins220,Islr2,Brsk1,Samd14,Dock7,Hdgfl3,Stmn4,Ccdc28b,Itsn1,Prex1,Fry,Ptk2,Apc,Rab3a,Dip2b,Rims1,Abl2,Map2k2,Palm,Carmil2,My…
GO:0030182	neuron differentiation	0.00167393	Map1b,Shank2,Rap1gap2,Inpp5j,Syngap1,Gprin3,Epb41l3,Bin1,Farp1,Arhgap44,Srcin1,Sipa1l1,Jun,Slc12a5,S1pr1,Crkl,Gprin1,Chd5,Dlg4,Camsap1,Map4,Plppr4,Plxna1,Dbn1,Sarm1,Npy,Kif3a,Sema4b,Cnr1,Kirrel3,Efnb1,Ppp1r9a,Tnik,Stxbp5,Nptx1,Trio,Ptk2b,Bcan,Kidins220,Islr2,Brinp2,Brsk1,Samd14,Dock7,Hdgfl3,Stmn4,Itsn1,Prex1,Fry,Ptk2,Rab3a,Dip2b,Rims1,Abl2,Map2k2,Sh3gl3,Nfix,Palm,Myh10,Capzb,Syn1,Iqsec1,Elavl4,Lm…
GO:0030154	cell differentiation	0.00193742	Map1b,Shank2,Rap1gap2,Inpp5j,Speg,Syngap1,Gprin3,Nhsl2,Grin2a,Smpd3,Epb41l3,Bin1,Foxs1,Hivep3,Mical2,Farp1,Arhgap44,Srcin1,Sipa1l1,Fmn2,Sorbs2,Jun,Spred1,Kat2a,Slc12a5,Lamc1,Jmjd1c,S1pr1,Crkl,Gprin1,Chd5,Pdcd4,Dlg4,Camsap1,Map4,Plppr4,Plxna1,Dbn1,Sarm1,Npy,Srsf1,Arhgef7,Fhl2,Fbxw7,Sirpa,Atp11c,Kif3a,Sema4b,Bmerb1,Add1,Ap3d1,Ifngr1,Cnr1,Kirrel3,Neb,Efnb1,Adam22,Ppp1r9a,Tnik,Stxbp5,Myo18b,Nptx1,Tri…
GO:0048869	cellular developmental process	0.00232386	Map1b,Shank2,Rap1gap2,Inpp5j,Speg,Syngap1,Gprin3,Nhsl2,Grin2a,Smpd3,Epb41l3,Bin1,Foxs1,Hivep3,Mical2,Farp1,Arhgap44,Srcin1,Sipa1l1,Fmn2,Sorbs2,Jun,Spred1,Kat2a,Slc12a5,Lamc1,Jmjd1c,S1pr1,Crkl,Gprin1,Chd5,Pdcd4,Dlg4,Camsap1,Map4,Plppr4,Plxna1,Dbn1,Sarm1,Npy,Srsf1,Arhgef7,Fhl2,Fbxw7,Sirpa,Atp11c,Kif3a,Sema4b,Bmerb1,Add1,Ap3d1,Ifngr1,Cnr1,Kirrel3,Neb,Efnb1,Adam22,Ppp1r9a,Tnik,Stxbp5,Myo18b,Nuak1,Npt…
GO:0034330	cell junction organization	0.00383125	Pclo,Bsn,Map1b,Shank2,Syngap1,Dlgap1,Elfn1,Grin2a,Epb41l3,Farp1,Arhgap44,Srcin1,Sipa1l1,Dgkb,Sorbs2,Lamc1,Crkl,Add2,Mapre2,Cacnb1,Dlg4,Dbn1,Arhgef7,Add1,Kirrel3,Efnb1,Ppp1r9a,Limch1,Nptx1,Ptk2b,Bcan,Ndrg2,Bcr,Itsn1,Camkv,Grm5,Ptk2,Ajm1,Rab3a,Dlgap3,Cacnb4,Palm,Myh10,Syn1,Iqsec1,Ank3,Shank1,Itpka,Dlg2,Shank3,Ctnna1,Ppfibp2,Kif1a,Dab2ip,Pard3,Stau2,Rap1a,Nos1ap,Dlg3,Epb41l5,Ctnna2,Svep1,Slk,Tanc1,N…
GO:0030036	actin cytoskeleton organization	0.00405017	Epb41l3,Bin1,Mphosph8,Mical2,Farp1,Arhgap44,Sipa1l1,Fmn2,Sorbs2,Tbck,S1pr1,Add2,Dbn1,Ssh2,Arhgef7,Sirpa,Add1,Neb,Ppp1r9a,Limch1,Tnik,Gas2l1,Ptk2b,Bcar1,Bcr,Samd14,Epb41l4b,Epb41,Prex1,Ehbp1,Cdc42bpb,Rictor,Carmil2,Myh10,Capzb,Epb41l4a,Sh2b2,Iqsec1,Epb41l1,Epb41l2,Marcks,Arhgef19,Magel2,Tmod2,Nebl,Shank1,Sptb,Itpka,Arfgef3,Fam171a1,Shank3,Ctnna1,Stau2,Nos1ap,Epb41l5,Ctnna2,Prkar1a,Abr,Zbed3,Parva,…
GO:0065007	biological regulation	0.0046419	Pclo,Larp6,Bsn,Map1b,Shank2,Rap1gap2,Inpp5j,Cic,Syngap1,Kcnb1,Maf1,Cacna1g,Dlgap1,Elfn1,Mast1,Grin2a,Usp36,Smpd3,Ndufaf2,Epb41l3,Nkd2,Bin1,Rab1b,Foxs1,Hivep3,Mphosph8,Grid1,Lrrfip1,Fgd4,Zfp101,Syn3,Mical2,Farp1,Arhgap44,Trafd1,Srcin1,Sipa1l1,Atxn2l,Fmn2,Dgkb,Sorcs3,Cadps,Sorbs2,Jun,Caskin1,Ralgps1,Rcan2,Pcdh11x,Elfn2,Tbck,Adcy9,Sipa1l2,Mknk2,Spred1,Abcb7,Kat2a,Nup214,Slc12a5,Hivep2,Rell2,Jmjd1c,S…
GO:0050789	regulation of biological process	0.0053774	Pclo,Larp6,Bsn,Map1b,Shank2,Rap1gap2,Inpp5j,Cic,Syngap1,Kcnb1,Maf1,Cacna1g,Dlgap1,Elfn1,Mast1,Grin2a,Usp36,Smpd3,Ndufaf2,Epb41l3,Nkd2,Bin1,Rab1b,Foxs1,Hivep3,Mphosph8,Grid1,Lrrfip1,Fgd4,Zfp101,Mical2,Farp1,Arhgap44,Trafd1,Srcin1,Sipa1l1,Atxn2l,Fmn2,Dgkb,Sorcs3,Cadps,Sorbs2,Jun,Caskin1,Ralgps1,Rcan2,Pcdh11x,Elfn2,Tbck,Adcy9,Sipa1l2,Mknk2,Spred1,Kat2a,Nup214,Hivep2,Rell2,Jmjd1c,S1pr1,Crkl,Ptpre,Cac…
GO:0000902	cell morphogenesis	0.00579279	Map1b,Shank2,Syngap1,Epb41l3,Fgd4,Farp1,Arhgap44,Srcin1,Sipa1l1,Lamc1,Jmjd1c,Crkl,Dlg4,Camsap1,Plppr4,Plxna1,Dbn1,Sarm1,Kif3a,Sema4b,Add1,Kirrel3,Efnb1,Ppp1r9a,Tnik,Stxbp5,Nptx1,Trio,Ptk2b,Bcar1,Bcan,Kidins220,Islr2,Brsk1,Dock7,Epb41,Prex1,Fry,Ptk2,Sidt2,Rab3a,Dip2b,Rims1,Map2k2,Palm,Myh10,Capzb,Epb41l2,Elavl4,Lmtk2,Ank3,Shank1,Camk2a,Akap5,Zswim8,Palmd,Itpka,Rtn4,Itsn2,Map2,Fam171a1,Shank3,Nbeal…
GO:0023052	signaling	0.0066803	Pclo,Bsn,Map1b,Shank2,Rap1gap2,Syngap1,Kcnb1,Cacna1g,Dlgap1,Mast1,Grin2a,Smpd3,Ndufaf2,Nkd2,Bin1,Grid1,Fgd4,Syn3,Farp1,Arhgap44,Sipa1l1,Dgkb,Sorcs3,Cadps,Sorbs2,Jun,Caskin1,Ralgps1,Rcan2,Tbck,Adcy9,Sipa1l2,Mknk2,Spred1,Kat2a,Slc12a5,Hivep2,Rell2,S1pr1,Crkl,Ptpre,Smcr8,Sub1,Chd5,Mapre2,Ranbp9,Slc4a8,Ralgapa1,Pde4b,Pdcd4,Cacnb1,Syn2,Prrt2,Dlg4,Plppr4,Plxna1,Dbn1,Sarm1,Npy,Srsf1,Syt10,Arhgef7,Hilpda…
GO:0050808	synapse organization	0.00687128	Pclo,Bsn,Map1b,Shank2,Syngap1,Dlgap1,Elfn1,Grin2a,Farp1,Arhgap44,Srcin1,Sipa1l1,Dgkb,Sorbs2,Crkl,Add2,Cacnb1,Dlg4,Dbn1,Arhgef7,Kirrel3,Efnb1,Ppp1r9a,Nptx1,Bcan,Ndrg2,Itsn1,Camkv,Grm5,Ptk2,Rab3a,Dlgap3,Cacnb4,Palm,Myh10,Syn1,Ank3,Shank1,Itpka,Dlg2,Shank3,Ppfibp2,Kif1a,Dab2ip,Stau2,Nos1ap,Dlg3,Ctnna2,Tanc1,Nefh,Gpm6a,Gabra1,Stau1
REAC:R-MMU-6794362	Protein-protein interactions at synapses	0.00713703	Shank2,Dlgap1,Grin2a,Epb41l3,Dlg4,Gria1,Dlgap2,Epb41,Grm5,Dlgap3,Epb41l2,Shank1,Dlg2,Shank3,Ppfibp2,Dlg3,Epb41l5,Dlgap4
GO:0005856	cytoskeleton	0.00905425	Pclo,Cep126,Bsn,Map1b,Shank2,Rap1gap2,Mast1,Pdzd2,Myh7b,Epb41l3,Bin1,Nefm,Tubb1,Fgd4,Mical2,Farp1,Srcin1,Sipa1l1,Fmn2,Sorbs2,Tbck,Amph,Kat2a,Rif1,Add2,Lrpprc,Mapre2,Pde4b,Dlg4,Camsap1,Map4,Dbn1,Sarm1,Ssh2,Arhgef7,Mdn1,Kif3a,Bmerb1,Add1,Cnr1,Neb,Ppp1r9a,Limch1,Tnik,Myo18b,Septin7,Nuak1,Akap12,Gas2l1,Ptk2b,Bcar1,Txndc9,Brsk1,Samd14,Septin3,Epb41l4b,Rangap1,Ccdc28b,Epb41,Itsn1,Atg16l1,Fry,Ptk2,Apc,T…
GO:0098992	neuronal dense core vesicle	0.0116478	Cadps,Npy,Chga,Scg2,Stxbp5,Syt5,Vps13a,Kif1a
GO:0007399	nervous system development	0.0124295	Pclo,Bsn,Map1b,Shank2,Rap1gap2,Inpp5j,Cic,Syngap1,Gprin3,Mast1,Grin2a,Epb41l3,Bin1,Farp1,Arhgap44,Srcin1,Sipa1l1,Jun,Kat2a,Slc12a5,S1pr1,Crkl,Gprin1,Add2,Chd5,Dlg4,Camsap1,Map4,Plppr4,Plxna1,Dbn1,Sarm1,Npy,Srsf1,Arhgef7,Kif3a,Sema4b,Bmerb1,Ifngr1,Cnr1,Kirrel3,Efnb1,Adam22,Ppp1r9a,Tnik,Stxbp5,Nptx1,Trio,Ptk2b,Bcan,Kidins220,Snw1,Ndrg2,Islr2,Brinp2,Brsk1,Bcr,Samd14,Dock7,Hdgfl3,Stmn4,Pikfyve,Slc6a1…
GO:0097060	synaptic membrane	0.0146603	Bsn,Shank2,Kcnb1,Dlgap1,Grin2a,Grid1,Farp1,Dgkb,Sorcs3,Crkl,Slc4a8,Prrt2,Dlg4,Plppr4,Dbn1,Gria1,Slc16a7,Cnr1,Efnb1,Adam22,Grin2b,Stxbp5,Septin3,Grm5,Syt11,Exoc3,Adcy8,Dnm1,Palm,Stx1b,Ank3,Shank1,Camk2a,Akap5,Cacna1c,Rtn4,Nbea,Slc6a6,Dlg2,Shank3,Dcc,Kcnd3,Synj1,Dagla,Syne1,Znrf2,Ctnna2,Prkcg,Shisa9,Gpm6a,Gabra1
GO:0050794	regulation of cellular process	0.0148515	Pclo,Larp6,Bsn,Map1b,Shank2,Rap1gap2,Inpp5j,Cic,Syngap1,Kcnb1,Maf1,Cacna1g,Dlgap1,Elfn1,Mast1,Grin2a,Usp36,Smpd3,Ndufaf2,Epb41l3,Nkd2,Bin1,Rab1b,Foxs1,Hivep3,Mphosph8,Grid1,Lrrfip1,Fgd4,Zfp101,Mical2,Farp1,Arhgap44,Srcin1,Sipa1l1,Atxn2l,Fmn2,Dgkb,Sorcs3,Cadps,Sorbs2,Jun,Caskin1,Ralgps1,Rcan2,Pcdh11x,Elfn2,Tbck,Adcy9,Sipa1l2,Mknk2,Spred1,Kat2a,Nup214,Hivep2,Rell2,Jmjd1c,S1pr1,Crkl,Ptpre,Cacna1e,Zf…
REAC:R-MMU-112316	Neuronal System	0.0168621	Shank2,Kcnb1,Dlgap1,Grin2a,Epb41l3,Syn3,Adcy9,Cacnb1,Syn2,Dlg4,Gria1,Dlgap2,Epb41,Grm5,Prkar1b,Rab3a,Dlgap3,Adcy8,Cacnb4,Syn1,Epb41l2,Shank1,Camk2a,Akap5,Camkk2,Dlg2,Shank3,Ppfibp2,Kcnd3,Tspoap1,Dlg3,Epb41l5,Kcnn2,Prkar1a,Prkcg,Dlgap4,Kcnh7,Gabra1
GO:0032989	cellular component morphogenesis	0.0181669	Map1b,Shank2,Syngap1,Epb41l3,Farp1,Arhgap44,Srcin1,Sipa1l1,Dlg4,Plppr4,Plxna1,Dbn1,Sarm1,Sema4b,Kirrel3,Neb,Efnb1,Ppp1r9a,Tnik,Stxbp5,Nptx1,Trio,Bcan,Kidins220,Islr2,Brsk1,Dock7,Pikfyve,Pid1,Ptk2,Rab3a,Dip2b,Rims1,Map2k2,Myh10,Elavl4,Lmtk2,Tmod2,Nebl,Ank3,Shank1,Camk2a,Akap5,Zswim8,Itpka,Rtn4,Itsn2,Map2,Shank3,Dcc,Unc5a,Myo16,Sema6a,Kif1a,Dab2ip,Tppp,Gorasp1,Nyap2,Spag9,Stau2,Plxna2,Syne1,Ctnna2,…
GO:0099092	postsynaptic density, intracellular component	0.0197514	Syngap1,Dlgap1,Tnik,Bcr,Sh3gl3,Iqsec1,Akap5,Shank3,Dlg3,Ctnna2,Abr,Tanc1
GO:0099091	postsynaptic specialization, intracellular component	0.0229722	Syngap1,Dlgap1,Tnik,Bcr,Sh3gl3,Iqsec1,Akap5,Shank3,Dlg3,Ctnna2,Lck,Abr,Tanc1
GO:0060627	regulation of vesicle-mediated transport	0.0231049	Pclo,Bsn,Kcnb1,Cacna1g,Smpd3,Bin1,Arhgap44,Cadps,Slc4a8,Prrt2,Dlg4,Syt10,Sirpa,Kif3a,Add1,Cbarp,Cnr1,Cacna1i,Stxbp5,Syt13,Syt5,Bcr,Itsn1,Syt11,Prkar1b,Ptk2,Cbl,Rab3a,Dnm1,Map2k2,Sh3gl3,Exph5,Cacnb4,Syn1,Atp2a2,Iqsec1,Stx1b,Sgip1,Akap5,Dnajc6,Snap91,C2cd5,Synj1,Pard3,Rap1a,Syne1,Dgkq,Prkcg,Abr,Wdr54,Arfgap1,Mctp1
GO:0007154	cell communication	0.0284807	Pclo,Bsn,Map1b,Shank2,Rap1gap2,Syngap1,Kcnb1,Cacna1g,Dlgap1,Mast1,Grin2a,Smpd3,Ndufaf2,Nkd2,Grid1,Fgd4,Syn3,Farp1,Arhgap44,Sipa1l1,Dgkb,Sorcs3,Cadps,Sorbs2,Jun,Caskin1,Ralgps1,Rcan2,Tbck,Adcy9,Sipa1l2,Mknk2,Spred1,Kat2a,Slc12a5,Hivep2,Rell2,S1pr1,Crkl,Ptpre,Smcr8,Sub1,Chd5,Mapre2,Ranbp9,Slc4a8,Ralgapa1,Pde4b,Pdcd4,Cacnb1,Syn2,Prrt2,Dlg4,Plppr4,Plxna1,Dbn1,Sarm1,Npy,Srsf1,Syt10,Arhgef7,Hilpda,Fhl2…
GO:0048812	neuron projection morphogenesis	0.0308217	Map1b,Shank2,Syngap1,Epb41l3,Farp1,Arhgap44,Srcin1,Sipa1l1,Dlg4,Plppr4,Plxna1,Dbn1,Sarm1,Sema4b,Kirrel3,Efnb1,Ppp1r9a,Tnik,Stxbp5,Nptx1,Trio,Bcan,Kidins220,Islr2,Brsk1,Dock7,Ptk2,Rab3a,Dip2b,Rims1,Map2k2,Myh10,Elavl4,Lmtk2,Ank3,Shank1,Camk2a,Akap5,Zswim8,Itpka,Rtn4,Itsn2,Map2,Shank3,Dcc,Unc5a,Myo16,Sema6a,Kif1a,Dab2ip,Gorasp1,Nyap2,Spag9,Stau2,Plxna2,Syne1,Ctnna2,Nefh,Raph1,Hecw2,Gpm6a,Map1s
GO:0048167	regulation of synaptic plasticity	0.0430158	Map1b,Shank2,Syngap1,Kcnb1,Grin2a,Sipa1l1,Sorcs3,Kat2a,Prrt2,Dlg4,Dbn1,Gria1,Ppp1r9a,Ptk2b,Brsk1,Grm5,Rab3a,Adcy8,Rgs14,Syn1,Shank1,Camk2a,Akap5,Itpka,Shank3,Stau2,Kcnn2,Prkcg,Shisa9,Stau1
GO:0051049	regulation of transport	0.0454694	Pclo,Bsn,Map1b,Shank2,Kcnb1,Cacna1g,Grin2a,Smpd3,Ndufaf2,Bin1,Arhgap44,Cadps,Nup214,Cacna1e,Slc4a8,Pde4b,Cacnb1,Prrt2,Dlg4,Dbn1,Syt10,Arhgef7,Fbxw7,Sirpa,Chga,Kif3a,Add1,Cbarp,Ifngr1,Cnr1,Cacna1i,Oga,Ppp1r9a,Stxbp5,Scg5,Syt13,Ptk2b,Syt5,Bcr,Rangap1,Kcnh8,Pid1,Epb41,Itsn1,Grm5,Syt11,Prkar1b,Ptk2,Sidt2,Exoc4,Cbl,Rab3a,Osbpl6,Adcy8,Dnm1,Gsto1,Map2k2,Sh3gl3,Exph5,Cacnb4,Myh10,Sh2b2,Syn1,Atp2a2,Iqsec1…
GO:0098793	presynapse	0.047973	Pclo,Bsn,Shank2,Grin2a,Bin1,Syn3,Arhgap44,Cadps,Amph,Slc4a8,Pde4b,Cacnb1,Syn2,Prrt2,Dlg4,Npy,Syt10,Gria1,Tprg1l,Ap3d1,Cbarp,Cnr1,Kirrel3,Efnb1,Tnik,Stxbp5,Syt5,Brsk1,Septin3,Slc6a17,Itsn1,Syt11,Exoc4,Rab3a,Exoc3,Kiaa1109,Adcy8,Dnm1,Sh3gl3,Cacnb4,Syn1,Iqsec1,Stx1b,Sgip1,Camk2a,Cacna1c,Dnajc6,Dlg2,Ppfibp2,Kif1a,Synj1,Nos1ap,Tspoap1,Dgkq,Znrf2,Ctnna2,Prkcg,Htt,Tanc1,Gpm6a,Mctp1

## Sheet: Table S2H. Pathway Clusters
Cluster	Enriched Pathways
Synapse and Plasma Membrane	GO:0098978,GO:0032589,GO:0071944,GO:0098590,GO:0005886,GO:0098794,GO:0030054,GO:0014069,GO:0045202,GO:0099572,GO:0098984,GO:0045211,REAC:R-MMU-6794361,GO:0032279,GO:0098685,REAC:R-MMU-6794362,GO:0031256,GO:0097060
Neuron Projection Morphogenesis	GO:0048858,GO:0032989,GO:0120039,GO:0032990,GO:0048812
Synapse Organization	GO:0050808,GO:0034330
Neuronal Cell Body	GO:0044297,GO:0043025
Cytoskeleton Organization	GO:0030036,GO:0030029,GO:0007010
Synaptic Signaling	GO:0043005,GO:0032879,GO:0050804,GO:0007154,GO:0042995,GO:0099177,GO:0030425,GO:0050794,GO:0099536,GO:0043197,GO:0099537,GO:0010646,GO:0030424,GO:0098916,GO:0065007,GO:0044309,GO:0007165,GO:0007267,GO:0007268,GO:0022603,GO:0023051,GO:0050789,GO:0097447,GO:0023052,GO:0048167,GO:0120025,GO:0036477
Neurogenesis	GO:0120036,GO:0048468,GO:0048869,GO:0007399,GO:0048699,GO:0016358,GO:0030154,GO:0030030,GO:0022008,GO:0031175,GO:0048666,GO:0030182
GTPase Regulation	GO:0043087
Splicing and RNA Processing	GO:0009889,GO:0006139,WP:000000,GO:0010629,GO:0006405,GO:0010468,GO:0010467,GO:0043229,GO:0009059,GO:1903506,GO:1903507,GO:0006325,GO:0043226,GO:1902679,GO:0043227,GO:0005654,GO:0043170,GO:0006338,GO:0045892,GO:0010556,GO:0071013,GO:0140513,GO:0010558,GO:0043231,GO:0034641,GO:1990904,GO:2000113,REAC:R-MMU-8953854,GO:2000112,GO:0034645,GO:0006351,GO:0043233,GO:0006355,GO:0045934,GO:0006357,KEGG:03…
