# Supplementary material for: A bidirectional switch in the Shank3 phosphorylation state biases synapses toward up- or downscaling
Source: eLife. 2022 Apr 26;11:e74277. doi: 10.7554/eLife.74277 (PMC9084893; doi:10.7554/eLife.74277)
Supplement: Figure 2—source data 1. [file elife-74277-fig2-data1.xlsx]

## Sheet: Figure 2B
ScanF	z	Sample Name	SrchName	Theo m/z	Reference	Start Position	End Position	ModScore Peptide_A	Site 1 PositionA	Site 1 ScoreA	ModScore Peptide_B	Site 1 PositionB	Site 1 ScoreB	Max Heavy	Max Light	H_L ratio	L_H ratio
27076	4	Sample#2A	67377_78tmt1	813.442	ProSAP2SHANK3	6	37	R.A]AVAAAAAPAEPPEPLS@PALAPAPAPPGPLPR.S	22	1000	R.A]AVAAAAAPAEPPEPLS@PALAPAPAPPGPLPR.S	22	1000	56013.6	60584.6	0.924552	1.08161
26597	4	Sample#1B	67375_76tmt2	810.686	ProSAP2SHANK3	6	37	R.AAVAAAAAPAEPPEPLS@PALAPAPAPPGPLPR.S	22	1000	R.AAVAAAAAPAEPPEPLS@PALAPAPAPPGPLPR.S	22	1000	28170.2	58766.3	0.47936	2.08612
27127	4	Sample#2A	67377_78tmt1	810.686	ProSAP2SHANK3	6	37	R.AAVAAAAAPAEPPEPLS@PALAPAPAPPGPLPR.S	22	1000	R.AAVAAAAAPAEPPEPLS@PALAPAPAPPGPLPR.S	22	1000	56013.6	60584.6	0.924552	1.08161
27165	4	Sample#2B	67377_78tmt2	810.686	ProSAP2SHANK3	6	37	R.AAVAAAAAPAEPPEPLS@PALAPAPAPPGPLPR.S	22	1000	R.AAVAAAAAPAEPPEPLS@PALAPAPAPPGPLPR.S	22	1000	72094.6	39661.5	1.81775	0.550131
19608	3	Sample#1A	67375_76tmt1	882.471	ProSAP2SHANK3	448	468	R.S]@ASDINLK#GDQPAASPGPTLR.S	448	0	R.S]@ASDINLK#GDQPAASPGPTLR.S	448	0	384600	525100	0.732432	1.36531
19743	3	Sample#1A	67375_76tmt1	882.471	ProSAP2SHANK3	448	468	R.S]@ASDINLK#GDQPAASPGPTLR.S	448	0	R.S]ASDINLK#GDQPAAS@PGPTLR.S	462	3.833	384600	525100	0.732432	1.36531
16561	3	Sample#1B	67375_76tmt2	882.471	ProSAP2SHANK3	448	468	R.S]@ASDINLK#GDQPAASPGPTLR.S	448	0	R.S]@ASDINLK#GDQPAASPGPTLR.S	448	0	752300	1083000	0.694645	1.43959
16113	3	Sample#2A	67377_78tmt1	882.471	ProSAP2SHANK3	448	468	R.S]@ASDINLK#GDQPAASPGPTLR.S	448	0	R.S]@ASDINLK#GDQPAASPGPTLR.S	448	0	159400	77241.1	2.06367	0.484574
16803	3	Sample#2A	67377_78tmt1	882.471	ProSAP2SHANK3	448	468	R.S]@ASDINLK#GDQPAASPGPTLR.S	448	0	R.S]@ASDINLK#GDQPAASPGPTLR.S	448	0	1472000	1278000	1.1518	0.868207
16812	4	Sample#2A	67377_78tmt1	662.105	ProSAP2SHANK3	448	468	R.S]@ASDINLK#GDQPAASPGPTLR.S	448	0	R.S]@ASDINLK#GDQPAASPGPTLR.S	448	0	670800	465400	1.44134	0.693798
16916	3	Sample#2A	67377_78tmt1	882.471	ProSAP2SHANK3	448	468	R.S]@ASDINLK#GDQPAASPGPTLR.S	448	0	R.S]@ASDINLK#GDQPAASPGPTLR.S	448	0	1472000	1278000	1.1518	0.868207
16988	3	Sample#2A	67377_78tmt1	882.471	ProSAP2SHANK3	448	468	R.S]@ASDINLK#GDQPAASPGPTLR.S	448	0	R.S]@ASDINLK#GDQPAASPGPTLR.S	448	0	1472000	1278000	1.1518	0.868207
16955	3	Sample#2B	67377_78tmt2	882.471	ProSAP2SHANK3	448	468	R.S]@ASDINLK#GDQPAASPGPTLR.S	448	0	R.S]@ASDINLK#GDQPAASPGPTLR.S	448	0	1404000	1192000	1.17785	0.849003
17097	3	Sample#2B	67377_78tmt2	882.471	ProSAP2SHANK3	448	468	R.S]@ASDINLK#GDQPAASPGPTLR.S	448	0	R.S]@ASDINLK#GDQPAASPGPTLR.S	448	0	1404000	1192000	1.17785	0.849003
17123	3	Sample#2B	67377_78tmt2	882.471	ProSAP2SHANK3	448	468	R.S]@ASDINLK#GDQPAASPGPTLR.S	448	0	R.S]@ASDINLK#GDQPAASPGPTLR.S	448	0	1404000	1192000	1.17785	0.849003
16548	3	Sample#1B	67375_76tmt2	875.121	ProSAP2SHANK3	448	468	R.SAS@DINLKGDQPAASPGPTLR.S	450	6.591	R.SAS@DINLKGDQPAASPGPTLR.S	450	9.404	752300	1083000	0.694645	1.43959
16557	3	Sample#1B	67375_76tmt2	875.121	ProSAP2SHANK3	448	468	R.SAS@DINLKGDQPAASPGPTLR.S	450	6.591	R.SAS@DINLKGDQPAASPGPTLR.S	450	9.404	752300	1083000	0.694645	1.43959
16744	3	Sample#1B	67375_76tmt2	875.121	ProSAP2SHANK3	448	468	R.SAS@DINLKGDQPAASPGPTLR.S	450	0	R.SASDINLKGDQPAAS@PGPTLR.S	462	12.285	752300	1083000	0.694645	1.43959
16816	3	Sample#2A	67377_78tmt1	875.121	ProSAP2SHANK3	448	468	R.SAS@DINLKGDQPAASPGPTLR.S	450	17.009	R.SAS@DINLKGDQPAASPGPTLR.S	450	9.404	1472000	1278000	1.1518	0.868207
16819	4	Sample#2A	67377_78tmt1	656.593	ProSAP2SHANK3	448	468	R.SAS@DINLKGDQPAASPGPTLR.S	450	0	R.SAS@DINLKGDQPAASPGPTLR.S	450	0	670800	465400	1.44134	0.693798
16958	3	Sample#2B	67377_78tmt2	875.121	ProSAP2SHANK3	448	468	R.SAS@DINLKGDQPAASPGPTLR.S	450	17.009	R.SAS@DINLKGDQPAASPGPTLR.S	450	22.851	1404000	1192000	1.17785	0.849003
17096	3	Sample#2B	67377_78tmt2	875.121	ProSAP2SHANK3	448	468	R.SAS@DINLKGDQPAASPGPTLR.S	450	6.591	R.SASDINLKGDQPAASPGPT@LR.S	466	0.842	1404000	1192000	1.17785	0.849003
16964	3	Sample#2B	67377_78tmt2	875.121	ProSAP2SHANK3	448	468	R.SASDINLKGDQPAASPGPT@LR.S	466	16.996	R.SASDINLKGDQPAASPGPT@LR.S	466	13.129	1404000	1192000	1.17785	0.849003
12326	4	Sample#2A	67377_78tmt1	861.703	ProSAP2SHANK3	503	535	R.G]GHS@K#ISPSGPGGSGPAPGPGPASPAPPAPPPR.G	506	0	R.G]GHSK#ISPSGPGGS@GPAPGPGPASPAPPAPPPR.G	516	1.833	204200	37906.3	5.38697	0.185633
12476	4	Sample#2B	67377_78tmt2	861.703	ProSAP2SHANK3	503	535	R.G]GHSK#ISPSGPGGS@GPAPGPGPASPAPPAPPPR.G	516	0	R.G]GHSK#ISPSGPGGS@GPAPGPGPASPAPPAPPPR.G	516	0	197200	0	#DIV/0!	0
12350	4	Sample#2A	67377_78tmt1	861.703	ProSAP2SHANK3	503	535	R.G]GHSK#ISPSGPGGSGPAPGPGPAS@PAPPAPPPR.G	526	0.604	R.G]GHSK#ISPSGPGGSGPAPGPGPAS@PAPPAPPPR.G	526	0.814	204200	0	#DIV/0!	0
15733	3	Sample#2B	67377_78tmt2	914.8	ProSAP2SHANK3	508	535	K.I]SPSGPGGS@GPAPGPGPASPAPPAPPPR.G	516	0.382	K.I]SPSGPGGS@GPAPGPGPASPAPPAPPPR.G	516	0	93569.1	43151.1	2.16841	0.461168
7064	3	Sample#2A	67377_78tmt1	611.3	ProSAP2SHANK3	555	568	K.AHS@PQGEGEIPLHR.G	557	1000	K.AHS@PQGEGEIPLHR.G	557	1000	627100	232700	2.69489	0.371073
11087	3	Sample#2A	67377_78tmt1	473.929	ProSAP2SHANK3	757	766	K.RAPS@TTLTLR.S	760	6.591	K.RAPS@TTLTLR.S	760	0	691000	1129000	0.612046	1.63386
22832	3	Sample#2A	67377_78tmt1	744.394	ProSAP2SHANK3	767	781	R.S]@K#SM*TAELEELASIR.R	767	0	R.S]@K#SM*TAELEELASIR.R	767	0	434400	357100	1.21647	0.822053
28612	3	Sample#1B	67375_76tmt2	739.062	ProSAP2SHANK3	767	781	R.S]@K#SMTAELEELASIR.R	767	0	R.S]@K#SMTAELEELASIR.R	767	0	31832.5	50806.8	0.62654	1.59607
29147	3	Sample#2A	67377_78tmt1	739.062	ProSAP2SHANK3	767	781	R.S]@K#SMTAELEELASIR.R	767	0	R.S]@K#SMTAELEELASIR.R	767	0	102400	72814.7	1.40631	0.711081
29229	3	Sample#2B	67377_78tmt2	739.062	ProSAP2SHANK3	767	781	R.S]@K#SMTAELEELASIR.R	767	0	R.S]K#SMTAELEELAS@IR.R	779	7.592	87503.7	64475.1	1.35717	0.736827
23377	3	Sample#2B	67377_78tmt2	744.394	ProSAP2SHANK3	767	781	R.S]K#SM*T@AELEELASIR.R	771	4.085	R.S@]@K#SM*TAELEELASIR.R	767	0	589300	498100	1.1831	0.84524
22965	3	Sample#2B	67377_78tmt2	737.044	ProSAP2SHANK3	767	781	R.SKS@M*TAELEELASIR.R	769	0	R.SKS@M*TAELEELASIR.R	769	0	589300	498100	1.1831	0.84524
22454	3	Sample#1B	67375_76tmt2	737.044	ProSAP2SHANK3	767	781	R.SKSM*TAELEELASIR.R	767	4.54	R.S@KSM*TAELEELASIR.R	767	7.167	265300	411900	0.644088	1.55258
22465	3	Sample#1B	67375_76tmt2	737.044	ProSAP2SHANK3	767	781	R.SKSM*TAELEELASIR.R	767	0	R.SKSM*T@AELEELASIR.R	771	4.356	265300	411900	0.644088	1.55258
22924	3	Sample#1B	67375_76tmt2	737.044	ProSAP2SHANK3	767	781	R.SKSM*TAELEELASIR.R	767	0	R.S@KSM*TAELEELASIR.R	767	0	292600	367400	0.796407	1.25564
24708	4	Sample#2B	67377_78tmt2	655.124	ProSAP2SHANK3	854	870	R.T]@K#SVGEDEK#LASLLEGR.F	854	0	R.T]@K#SVGEDEK#LASLLEGR.F	854	0	804400	530900	1.51516	0.659995
24736	4	Sample#2B	67377_78tmt2	655.124	ProSAP2SHANK3	854	870	R.T]@K#SVGEDEK#LASLLEGR.F	854	0	R.T]@K#SVGEDEK#LASLLEGR.F	854	0	804400	530900	1.51516	0.659995
28913	3	Sample#1A	67375_76tmt1	873.162	ProSAP2SHANK3	854	870	R.T]K#S@VGEDEK#LASLLEGR.F	856	4.344	R.T]@K#SVGEDEK#LASLLEGR.F	854	0	121000	126700	0.955012	1.04711
24636	3	Sample#2A	67377_78tmt1	873.162	ProSAP2SHANK3	854	870	R.T]K#SVGEDEK#LAS@LLEGR.F	865	7.756	R.T]K#S@VGEDEK#LASLLEGR.F	856	1.765	492900	442900	1.11289	0.89856
6719	3	Sample#2A	67377_78tmt1	582.309	ProSAP2SHANK3	854	862	R.TKS@VGEDEK.L	856	11.015	R.TKS@VGEDEK.L	856	6.65	302000	650700	0.464116	2.15464
28780	4	Sample#1A	67375_76tmt1	646.855	ProSAP2SHANK3	854	870	R.TKS@VGEDEKLASLLEGR.F	856	0	R.TKS@VGEDEKLASLLEGR.F	856	0	183700	130000	1.41308	0.707676
24228	4	Sample#1B	67375_76tmt2	646.855	ProSAP2SHANK3	854	870	R.TKS@VGEDEKLASLLEGR.F	856	0	R.TKS@VGEDEKLASLLEGR.F	856	0	200200	272900	0.733602	1.36314
2935	2	Sample#1A	67375_76tmt1	672.797	ProSAP2SHANK3	874	882	R.S@TSM*QDTVR.E	874	0	R.S@TSM*QDTVR.E	874	0	19368.6	31296.9	0.618866	1.61586
2979	2	Sample#2B	67377_78tmt2	672.797	ProSAP2SHANK3	874	882	R.S@TSM*QDTVR.E	874	0	R.S@TSM*QDTVR.E	874	0	56749.4	72865.5	0.778824	1.28399
2991	2	Sample#2B	67377_78tmt2	678.309	ProSAP2SHANK3	874	882	R.S]@TSM*QDTVR.E	874	0	R.S]@TSM*QDTVR.E	874	0	56749.4	72865.5	0.778824	1.28399
2970	2	Sample#2B	67377_78tmt2	672.797	ProSAP2SHANK3	874	882	R.ST@SM*QDTVR.E	875	0	R.ST@SM*QDTVR.E	875	0	56749.4	72865.5	0.778824	1.28399
23482	4	Sample#1A	67375_76tmt1	896.72	ProSAP2SHANK3	966	994	R.SM*IILQDS@APEVGDVPRPAPAATPPERPK.R	973	9.911	R.S@M*IILQDSAPEVGDVPRPAPAATPPERPK.R	966	9.214	0	41263.8	0	#DIV/0!
26081	4	Sample#1B	67375_76tmt2	807.925	ProSAP2SHANK3	1101	1128	R.RRS@TVFLSVGAIEGSPPSADLPSLQPSR.S	1103	0	R.RRS@TVFLSVGAIEGSPPSADLPSLQPSR.S	1103	0	30945	31133.8	0.993936	1.0061
26572	4	Sample#2A	67377_78tmt1	807.925	ProSAP2SHANK3	1101	1128	R.RRS@TVFLSVGAIEGSPPSADLPSLQPSR.S	1103	0	R.RRS@TVFLSVGAIEGSPPSADLPSLQPSR.S	1103	0	30164.9	30064	1.00336	0.996655
31253	3	Sample#2A	67377_78tmt1	976.505	ProSAP2SHANK3	1103	1128	R.S]@TVFLSVGAIEGSPPSADLPSLQPSR.S	1103	0	R.S]T@VFLSVGAIEGSPPSADLPSLQPSR.S	1104	4.705	31111.6	61534.4	0.505597	1.97786
31352	3	Sample#2B	67377_78tmt2	976.505	ProSAP2SHANK3	1103	1128	R.S]@TVFLSVGAIEGSPPSADLPSLQPSR.S	1103	0	R.S]@TVFLSVGAIEGSPPSADLPSLQPSR.S	1103	0	28726.2	62806.7	0.457375	2.18639
36741	3	Sample#1A	67375_76tmt1	972.83	ProSAP2SHANK3	1103	1128	R.STVFLS@VGAIEGSPPSADLPSLQPSR.S	1108	0	R.STVFLS@VGAIEGSPPSADLPSLQPSR.S	1108	0	15992.1	47581	0.336103	2.97528
30724	3	Sample#1B	67375_76tmt2	972.83	ProSAP2SHANK3	1103	1128	R.STVFLS@VGAIEGSPPSADLPSLQPSR.S	1108	0	R.STVFLS@VGAIEGSPPSADLPSLQPSR.S	1108	0	15844.2	83162.8	0.19052	5.24879
31243	3	Sample#2A	67377_78tmt1	972.83	ProSAP2SHANK3	1103	1128	R.STVFLSVGAIEGS@PPSADLPSLQPSR.S	1115	0.905	R.STVFLSVGAIEGS@PPSADLPSLQPSR.S	1115	2.513	31111.6	61534.4	0.505597	1.97786
31343	3	Sample#2B	67377_78tmt2	972.83	ProSAP2SHANK3	1103	1128	R.STVFLSVGAIEGS@PPSADLPSLQPSR.S	1115	3.796	R.ST@VFLSVGAIEGSPPSADLPSLQPSR.S	1104	0	28726.2	62806.7	0.457375	2.18639
18563	3	Sample#1B	67375_76tmt2	935.139	ProSAP2SHANK3	1204	1226	R.S]@PTPVHSPDADRPGPLFVDVQTR.D	1204	0	R.S]@PTPVHSPDADRPGPLFVDVQTR.D	1204	0	63596.5	19551.5	3.25277	0.30743
18804	4	Sample#2A	67377_78tmt1	701.606	ProSAP2SHANK3	1204	1226	R.S]PT@PVHSPDADRPGPLFVDVQTR.D	1206	11.235	R.S]PT@PVHSPDADRPGPLFVDVQTR.D	1206	15.756	227700	99477	2.28897	0.436877
13541	3	Sample#1B	67375_76tmt2	630.975	ProSAP2SHANK3	1227	1241	R.DS@ERGPLASPAFSPR.S	1228	2.949	R.DSERGPLAS@PAFSPR.S	1235	6.888	103700	237200	0.437184	2.28737
13694	3	Sample#2A	67377_78tmt1	630.975	ProSAP2SHANK3	1227	1241	R.DS@ERGPLASPAFSPR.S	1228	6.294	R.DSERGPLAS@PAFSPR.S	1235	0	221300	283900	0.7795	1.28287
13820	3	Sample#2B	67377_78tmt2	630.975	ProSAP2SHANK3	1227	1241	R.DS@ERGPLASPAFSPR.S	1228	16.198	R.DSERGPLAS@PAFSPR.S	1235	6.888	181700	276100	0.658095	1.51954
16632	2	Sample#1B	67375_76tmt2	702.358	ProSAP2SHANK3	1231	1241	R.GPLAS@PAFSPR.S	1235	20.167	R.GPLAS@PAFSPR.S	1235	16.509	180500	124900	1.44516	0.691967
16880	2	Sample#2A	67377_78tmt1	702.358	ProSAP2SHANK3	1231	1241	R.GPLAS@PAFSPR.S	1235	20.167	R.GPLAS@PAFSPR.S	1235	16.509	243400	164800	1.47694	0.677075
17044	2	Sample#2B	67377_78tmt2	702.358	ProSAP2SHANK3	1231	1241	R.GPLAS@PAFSPR.S	1235	31.275	R.GPLAS@PAFSPR.S	1235	42.886	253800	151700	1.67304	0.597715
17084	2	Sample#2B	67377_78tmt2	702.358	ProSAP2SHANK3	1231	1241	R.GPLAS@PAFSPR.S	1235	20.167	R.GPLAS@PAFSPR.S	1235	28.697	253800	151700	1.67304	0.597715
21663	4	Sample#1A	67375_76tmt1	887.682	ProSAP2SHANK3	1301	1331	R.L]GAEEERPGT@PELAPTPM*QAAAVAEPM*PSPR.A	1310	1.197	R.L]GAEEERPGTPELAPT@PM*QAAAVAEPM*PSPR.A	1316	0	162200	296800	0.546496	1.82984
18631	4	Sample#2B	67377_78tmt2	887.682	ProSAP2SHANK3	1301	1331	R.L]GAEEERPGT@PELAPTPM*QAAAVAEPM*PSPR.A	1310	3.922	R.L]GAEEERPGT@PELAPTPM*QAAAVAEPM*PSPR.A	1310	2.978	298400	326700	0.913376	1.09484
18790	4	Sample#2B	67377_78tmt2	887.682	ProSAP2SHANK3	1301	1331	R.L]GAEEERPGT@PELAPTPM*QAAAVAEPM*PSPR.A	1310	1.197	R.L]GAEEERPGTPELAPT@PM*QAAAVAEPM*PSPR.A	1316	0	298400	261100	1.14286	0.875
21867	4	Sample#1A	67375_76tmt1	887.682	ProSAP2SHANK3	1301	1331	R.L]GAEEERPGTPELAPT@PM*QAAAVAEPM*PSPR.A	1316	1.286	R.L]GAEEERPGTPELAPT@PM*QAAAVAEPM*PSPR.A	1316	0	162200	296800	0.546496	1.82984
21955	4	Sample#1A	67375_76tmt1	887.682	ProSAP2SHANK3	1301	1331	R.L]GAEEERPGTPELAPT@PM*QAAAVAEPM*PSPR.A	1316	1.286	R.L]GAEEERPGTPELAPT@PM*QAAAVAEPM*PSPR.A	1316	3.113	162200	296800	0.546496	1.82984
18408	4	Sample#1B	67375_76tmt2	887.682	ProSAP2SHANK3	1301	1331	R.L]GAEEERPGTPELAPT@PM*QAAAVAEPM*PSPR.A	1316	1.286	R.L]GAEEERPGTPELAPT@PM*QAAAVAEPM*PSPR.A	1316	3.113	214200	362600	0.590734	1.69281
18444	4	Sample#1B	67375_76tmt2	887.682	ProSAP2SHANK3	1301	1331	R.L]GAEEERPGTPELAPT@PM*QAAAVAEPM*PSPR.A	1316	1.286	R.L]GAEEERPGTPELAPT@PM*QAAAVAEPM*PSPR.A	1316	3.113	214200	362600	0.590734	1.69281
18482	4	Sample#2A	67377_78tmt1	887.682	ProSAP2SHANK3	1301	1331	R.L]GAEEERPGTPELAPT@PM*QAAAVAEPM*PSPR.A	1316	1.286	R.L]GAEEERPGTPELAPT@PM*QAAAVAEPM*PSPR.A	1316	3.113	367900	271200	1.35656	0.737157
18616	4	Sample#2B	67377_78tmt2	887.682	ProSAP2SHANK3	1301	1331	R.L]GAEEERPGTPELAPT@PM*QAAAVAEPM*PSPR.A	1316	0	R.L]GAEEERPGTPELAPT@PM*QAAAVAEPM*PSPR.A	1316	0	298400	326700	0.913376	1.09484
18907	4	Sample#2B	67377_78tmt2	887.682	ProSAP2SHANK3	1301	1331	R.L]GAEEERPGTPELAPT@PM*QAAAVAEPM*PSPR.A	1316	1.908	R.L]GAEEERPGTPELAPT@PM*QAAAVAEPM*PSPR.A	1316	0	298400	261100	1.14286	0.875
21679	4	Sample#1A	67375_76tmt1	887.682	ProSAP2SHANK3	1301	1331	R.L]GAEEERPGTPELAPTPM*QAAAVAEPM*PS@PR.A	1329	2.995	R.L]GAEEERPGT@PELAPTPM*QAAAVAEPM*PSPR.A	1310	0.787	162200	296800	0.546496	1.82984
18206	4	Sample#1B	67375_76tmt2	887.682	ProSAP2SHANK3	1301	1331	R.L]GAEEERPGTPELAPTPM*QAAAVAEPM*PS@PR.A	1329	3.796	R.L]GAEEERPGTPELAPT@PM*QAAAVAEPM*PSPR.A	1316	0	214200	362600	0.590734	1.69281
21651	4	Sample#1A	67375_76tmt1	884.925	ProSAP2SHANK3	1301	1331	R.LGAEEERPGT@PELAPTPM*QAAAVAEPM*PSPR.A	1310	1.286	R.LGAEEERPGTPELAPT@PM*QAAAVAEPM*PSPR.A	1316	0	162200	296800	0.546496	1.82984
21673	4	Sample#1A	67375_76tmt1	884.925	ProSAP2SHANK3	1301	1331	R.LGAEEERPGT@PELAPTPM*QAAAVAEPM*PSPR.A	1310	8.463	R.LGAEEERPGT@PELAPTPM*QAAAVAEPM*PSPR.A	1310	3.113	162200	296800	0.546496	1.82984
21797	4	Sample#1A	67375_76tmt1	884.925	ProSAP2SHANK3	1301	1331	R.LGAEEERPGT@PELAPTPM*QAAAVAEPM*PSPR.A	1310	14.003	R.LGAEEERPGT@PELAPTPM*QAAAVAEPM*PSPR.A	1310	8.532	162200	296800	0.546496	1.82984
21874	4	Sample#1A	67375_76tmt1	884.925	ProSAP2SHANK3	1301	1331	R.LGAEEERPGT@PELAPTPM*QAAAVAEPM*PSPR.A	1310	4.16	R.LGAEEERPGT@PELAPTPM*QAAAVAEPM*PSPR.A	1310	3.113	162200	296800	0.546496	1.82984
18186	4	Sample#1B	67375_76tmt2	884.925	ProSAP2SHANK3	1301	1331	R.LGAEEERPGT@PELAPTPM*QAAAVAEPM*PSPR.A	1310	1.286	R.LGAEEERPGT@PELAPTPM*QAAAVAEPM*PSPR.A	1310	3.113	214200	362600	0.590734	1.69281
18347	4	Sample#1B	67375_76tmt2	884.925	ProSAP2SHANK3	1301	1331	R.LGAEEERPGT@PELAPTPM*QAAAVAEPM*PSPR.A	1310	1.286	R.LGAEEERPGT@PELAPTPM*QAAAVAEPM*PSPR.A	1310	3.113	214200	362600	0.590734	1.69281
18491	4	Sample#1B	67375_76tmt2	884.925	ProSAP2SHANK3	1301	1331	R.LGAEEERPGT@PELAPTPM*QAAAVAEPM*PSPR.A	1310	4.16	R.LGAEEERPGT@PELAPTPM*QAAAVAEPM*PSPR.A	1310	8.532	214200	362600	0.590734	1.69281
18481	4	Sample#2A	67377_78tmt1	884.925	ProSAP2SHANK3	1301	1331	R.LGAEEERPGT@PELAPTPM*QAAAVAEPM*PSPR.A	1310	4.16	R.LGAEEERPGT@PELAPTPM*QAAAVAEPM*PSPR.A	1310	8.532	367900	271200	1.35656	0.737157
18512	4	Sample#2A	67377_78tmt1	884.925	ProSAP2SHANK3	1301	1331	R.LGAEEERPGT@PELAPTPM*QAAAVAEPM*PSPR.A	1310	4.16	R.LGAEEERPGTPELAPT@PM*QAAAVAEPM*PSPR.A	1316	0	367900	271200	1.35656	0.737157
18675	4	Sample#2A	67377_78tmt1	884.925	ProSAP2SHANK3	1301	1331	R.LGAEEERPGT@PELAPTPM*QAAAVAEPM*PSPR.A	1310	8.463	R.LGAEEERPGT@PELAPTPM*QAAAVAEPM*PSPR.A	1310	8.532	367900	271200	1.35656	0.737157
18629	4	Sample#2B	67377_78tmt2	884.925	ProSAP2SHANK3	1301	1331	R.LGAEEERPGT@PELAPTPM*QAAAVAEPM*PSPR.A	1310	4.16	R.LGAEEERPGT@PELAPTPM*QAAAVAEPM*PSPR.A	1310	3.113	298400	326700	0.913376	1.09484
18787	4	Sample#2B	67377_78tmt2	884.925	ProSAP2SHANK3	1301	1331	R.LGAEEERPGT@PELAPTPM*QAAAVAEPM*PSPR.A	1310	8.463	R.LGAEEERPGT@PELAPTPM*QAAAVAEPM*PSPR.A	1310	8.532	298400	261100	1.14286	0.875
18808	4	Sample#2B	67377_78tmt2	884.925	ProSAP2SHANK3	1301	1331	R.LGAEEERPGT@PELAPTPM*QAAAVAEPM*PSPR.A	1310	1.286	R.LGAEEERPGT@PELAPTPM*QAAAVAEPM*PSPR.A	1310	3.113	298400	261100	1.14286	0.875
21631	4	Sample#1A	67375_76tmt1	884.925	ProSAP2SHANK3	1301	1331	R.LGAEEERPGTPELAPT@PM*QAAAVAEPM*PSPR.A	1316	0	R.LGAEEERPGTPELAPT@PM*QAAAVAEPM*PSPR.A	1316	0	162200	296800	0.546496	1.82984
18221	4	Sample#1B	67375_76tmt2	884.925	ProSAP2SHANK3	1301	1331	R.LGAEEERPGTPELAPT@PM*QAAAVAEPM*PSPR.A	1316	0	R.LGAEEERPGTPELAPT@PM*QAAAVAEPM*PSPR.A	1316	0	136500	213200	0.640244	1.5619
18365	4	Sample#1B	67375_76tmt2	884.925	ProSAP2SHANK3	1301	1331	R.LGAEEERPGTPELAPT@PM*QAAAVAEPM*PSPR.A	1316	4.416	R.LGAEEERPGTPELAPT@PM*QAAAVAEPM*PSPR.A	1316	8.863	214200	362600	0.590734	1.69281
18656	4	Sample#2A	67377_78tmt1	884.925	ProSAP2SHANK3	1301	1331	R.LGAEEERPGTPELAPT@PM*QAAAVAEPM*PSPR.A	1316	1.383	R.LGAEEERPGTPELAPT@PM*QAAAVAEPM*PSPR.A	1316	3.256	367900	271200	1.35656	0.737157
37210	3	Sample#1A	67375_76tmt1	756.403	ProSAP2SHANK3	1586	1603	R.S@LGEEPVGGLGSLLDPAK.K	1586	13.745	R.S@LGEEPVGGLGSLLDPAK.K	1586	14.03	43671.4	82266	0.530856	1.88375
37300	3	Sample#1A	67375_76tmt1	756.403	ProSAP2SHANK3	1586	1603	R.S@LGEEPVGGLGSLLDPAK.K	1586	5.906	R.S@LGEEPVGGLGSLLDPAK.K	1586	4.304	31090.5	82266	0.377926	2.64602
37515	3	Sample#1A	67375_76tmt1	756.403	ProSAP2SHANK3	1586	1603	R.S@LGEEPVGGLGSLLDPAK.K	1586	1.318	R.S@LGEEPVGGLGSLLDPAK.K	1586	1.366	5060.6	15616.9	0.324046	3.08598
37710	3	Sample#1A	67375_76tmt1	756.403	ProSAP2SHANK3	1586	1603	R.S@LGEEPVGGLGSLLDPAK.K	1586	5.906	R.S@LGEEPVGGLGSLLDPAK.K	1586	8.599	31594.7	15616.9	2.02311	0.494289
31449	3	Sample#1B	67375_76tmt2	756.403	ProSAP2SHANK3	1586	1603	R.S@LGEEPVGGLGSLLDPAK.K	1586	13.745	R.S@LGEEPVGGLGSLLDPAK.K	1586	20.427	53810.1	162900	0.330326	3.02731
31547	3	Sample#1B	67375_76tmt2	756.403	ProSAP2SHANK3	1586	1603	R.S@LGEEPVGGLGSLLDPAK.K	1586	30.563	R.S@LGEEPVGGLGSLLDPAK.K	1586	27.664	53810.1	162900	0.330326	3.02731
31820	3	Sample#1B	67375_76tmt2	756.403	ProSAP2SHANK3	1586	1603	R.S@LGEEPVGGLGSLLDPAK.K	1586	9.45	R.S@LGEEPVGGLGSLLDPAK.K	1586	14.03	53810.1	162900	0.330326	3.02731
31990	3	Sample#2A	67377_78tmt1	756.403	ProSAP2SHANK3	1586	1603	R.S@LGEEPVGGLGSLLDPAK.K	1586	13.745	R.SLGEEPVGGLGS@LLDPAK.K	1597	8.599	97266.8	171200	0.568147	1.76011
32093	3	Sample#2A	67377_78tmt1	756.403	ProSAP2SHANK3	1586	1603	R.S@LGEEPVGGLGSLLDPAK.K	1586	13.745	R.S@LGEEPVGGLGSLLDPAK.K	1586	14.03	97266.8	171200	0.568147	1.76011
32315	3	Sample#2A	67377_78tmt1	756.403	ProSAP2SHANK3	1586	1603	R.S@LGEEPVGGLGSLLDPAK.K	1586	5.906	R.S@LGEEPVGGLGSLLDPAK.K	1586	8.599	97266.8	171200	0.568147	1.76011
32108	3	Sample#2B	67377_78tmt2	756.403	ProSAP2SHANK3	1586	1603	R.S@LGEEPVGGLGSLLDPAK.K	1586	24.352	R.S@LGEEPVGGLGSLLDPAK.K	1586	20.427	79630.7	229300	0.347277	2.87954
32226	3	Sample#2B	67377_78tmt2	756.403	ProSAP2SHANK3	1586	1603	R.S@LGEEPVGGLGSLLDPAK.K	1586	24.352	R.S@LGEEPVGGLGSLLDPAK.K	1586	27.664	79630.7	229300	0.347277	2.87954
31505	3	Sample#1B	67375_76tmt2	763.752	ProSAP2SHANK3	1586	1603	R.S]@LGEEPVGGLGSLLDPAK#.K	1586	0	R.S]@LGEEPVGGLGSLLDPAK#.K	1586	0	53810.1	162900	0.330326	3.02731
29217	4	Sample#2A	67377_78tmt1	830.479	ProSAP2SHANK3	1586	1611	R.S]@LGEEPVGGLGSLLDPAK#K#SPIAAAR.L	1586	0	R.S]@LGEEPVGGLGSLLDPAK#K#SPIAAAR.L	1586	0	136300	92750.9	1.46953	0.680491
29297	4	Sample#2B	67377_78tmt2	830.479	ProSAP2SHANK3	1586	1611	R.S]@LGEEPVGGLGSLLDPAK#K#SPIAAAR.L	1586	0	R.S]@LGEEPVGGLGSLLDPAK#K#SPIAAAR.L	1586	0	93569.6	82199.5	1.13832	0.878485
34424	4	Sample#1A	67375_76tmt1	822.211	ProSAP2SHANK3	1586	1611	R.SLGEEPVGGLGS@LLDPAKKSPIAAAR.L	1597	15.012	R.SLGEEPVGGLGS@LLDPAKKSPIAAAR.L	1597	6.441	31843.4	41032.8	0.776047	1.28858
34444	4	Sample#1A	67375_76tmt1	822.211	ProSAP2SHANK3	1586	1611	R.SLGEEPVGGLGSLLDPAKKS@PIAAAR.L	1605	5.725	R.SLGEEPVGGLGSLLDPAKKS@PIAAAR.L	1605	0	31843.4	41032.8	0.776047	1.28858
34488	4	Sample#1A	67375_76tmt1	822.211	ProSAP2SHANK3	1586	1611	R.SLGEEPVGGLGSLLDPAKKS@PIAAAR.L	1605	5.725	R.SLGEEPVGGLGSLLDPAKKS@PIAAAR.L	1605	2.226	31843.4	41032.8	0.776047	1.28858
34509	4	Sample#1A	67375_76tmt1	822.211	ProSAP2SHANK3	1586	1611	R.SLGEEPVGGLGSLLDPAKKS@PIAAAR.L	1605	5.725	R.SLGEEPVGGLGSLLDPAKKS@PIAAAR.L	1605	6.441	31843.4	41032.8	0.776047	1.28858
28669	4	Sample#1B	67375_76tmt2	822.211	ProSAP2SHANK3	1586	1611	R.SLGEEPVGGLGSLLDPAKKS@PIAAAR.L	1605	20.999	R.SLGEEPVGGLGSLLDPAKKS@PIAAAR.L	1605	12.213	53375.6	51518.1	1.03606	0.965199
29197	4	Sample#2A	67377_78tmt1	822.211	ProSAP2SHANK3	1586	1611	R.SLGEEPVGGLGSLLDPAKKS@PIAAAR.L	1605	2.64	R.SLGEEPVGGLGSLLDPAKKS@PIAAAR.L	1605	6.441	136300	92750.9	1.46953	0.680491
29220	4	Sample#2A	67377_78tmt1	822.211	ProSAP2SHANK3	1586	1611	R.SLGEEPVGGLGSLLDPAKKS@PIAAAR.L	1605	5.725	R.SLGEEPVGGLGSLLDPAKKS@PIAAAR.L	1605	12.213	136300	92750.9	1.46953	0.680491
29332	4	Sample#2A	67377_78tmt1	822.211	ProSAP2SHANK3	1586	1611	R.SLGEEPVGGLGSLLDPAKKS@PIAAAR.L	1605	20.999	R.SLGEEPVGGLGSLLDPAKKS@PIAAAR.L	1605	12.213	136300	92750.9	1.46953	0.680491
29302	4	Sample#2B	67377_78tmt2	822.211	ProSAP2SHANK3	1586	1611	R.SLGEEPVGGLGSLLDPAKKS@PIAAAR.L	1605	20.999	R.SLGEEPVGGLGSLLDPAKKS@PIAAAR.L	1605	19.243	93569.6	82199.5	1.13832	0.878485
29322	4	Sample#2B	67377_78tmt2	822.211	ProSAP2SHANK3	1586	1611	R.SLGEEPVGGLGSLLDPAKKS@PIAAAR.L	1605	15.012	R.SLGEEPVGGLGSLLDPAKKS@PIAAAR.L	1605	19.243	93569.6	82199.5	1.13832	0.878485
29405	4	Sample#2B	67377_78tmt2	822.211	ProSAP2SHANK3	1586	1611	R.SLGEEPVGGLGSLLDPAKKS@PIAAAR.L	1605	5.725	R.SLGEEPVGGLGSLLDPAKKS@PIAAAR.L	1605	6.441	93569.6	82199.5	1.13832	0.878485
29439	4	Sample#2B	67377_78tmt2	822.211	ProSAP2SHANK3	1586	1611	R.SLGEEPVGGLGSLLDPAKKS@PIAAAR.L	1605	15.012	R.SLGEEPVGGLGSLLDPAKKS@PIAAAR.L	1605	19.243	93569.6	82199.5	1.13832	0.878485
35280	3	Sample#1A	67375_76tmt1	638.331	ProSAP2SHANK3	1612	1626	R.LFS@SLGELSTISAQR.S	1614	0	R.LFS@SLGELSTISAQR.S	1614	0	24870.1	164500	0.151186	6.61437
35413	3	Sample#1A	67375_76tmt1	638.331	ProSAP2SHANK3	1612	1626	R.LFS@SLGELSTISAQR.S	1614	0	R.LFS@SLGELSTISAQR.S	1614	0	24870.1	164500	0.151186	6.61437
29600	3	Sample#1B	67375_76tmt2	638.331	ProSAP2SHANK3	1612	1626	R.LFS@SLGELSTISAQR.S	1614	0	R.LFS@SLGELSTISAQR.S	1614	0	48839.2	228000	0.214207	4.66838
30176	3	Sample#2B	67377_78tmt2	638.331	ProSAP2SHANK3	1612	1626	R.LFS@SLGELSTISAQR.S	1614	0	R.LFS@SLGELSTISAQR.S	1614	0	82563.7	355600	0.232181	4.30698
35398	3	Sample#1A	67375_76tmt1	638.331	ProSAP2SHANK3	1612	1626	R.LFSS@LGELSTISAQR.S	1615	6.591	R.LFSS@LGELSTISAQR.S	1615	0	24870.1	138000	0.180218	5.54883
30113	3	Sample#2A	67377_78tmt1	638.331	ProSAP2SHANK3	1612	1626	R.LFSS@LGELSTISAQR.S	1615	6.591	R.LFSS@LGELSTISAQR.S	1615	0	54212.9	245700	0.220647	4.53213
10097	3	Sample#2B	67377_78tmt2	653.38	ProSAP2SHANK3	1650	1662	R.R]APSPVK#PAS@LER.V	1659	3.701	R.R]APSPVK#PAS@LER.V	1659	7.925	920900	664800	1.38523	0.721902
12285	3	Sample#1A	67375_76tmt1	821.739	ProSAP2SHANK3	1710	1732	R.S@RSPSPSPLPSPSPGSGPSAGPR.R	1710	0	R.S@RSPSPSPLPSPSPGSGPSAGPR.R	1710	0	58543.2	84845.2	0.69	1.44928
10615	3	Sample#2A	67377_78tmt1	821.739	ProSAP2SHANK3	1710	1732	R.S@RSPSPSPLPSPSPGSGPSAGPR.R	1710	0	R.S@RSPSPSPLPSPSPGSGPSAGPR.R	1710	0	59477	196800	0.302221	3.30884
10626	3	Sample#2A	67377_78tmt1	821.739	ProSAP2SHANK3	1710	1732	R.S@RSPSPSPLPSPSPGSGPSAGPR.R	1710	5.085	R.S@RSPSPSPLPSPSPGSGPSAGPR.R	1710	7.772	59477	196800	0.302221	3.30884
10900	3	Sample#2A	67377_78tmt1	821.739	ProSAP2SHANK3	1710	1732	R.S@RSPSPSPLPSPSPGSGPSAGPR.R	1710	0	R.S@RSPSPSPLPSPSPGSGPSAGPR.R	1710	0	159400	256200	0.62217	1.60728
10724	3	Sample#2B	67377_78tmt2	821.739	ProSAP2SHANK3	1710	1732	R.S@RSPSPSPLPSPSPGSGPSAGPR.R	1710	6.91	R.SRSPSPS@PLPSPSPGSGPSAGPR.R	1716	4.137	45266.1	190700	0.237368	4.21287
11015	3	Sample#2B	67377_78tmt2	821.739	ProSAP2SHANK3	1710	1732	R.S@RSPSPSPLPSPSPGSGPSAGPR.R	1710	0	R.S@RSPSPSPLPSPSPGSGPSAGPR.R	1710	0	182700	174700	1.04579	0.956212
11032	3	Sample#2B	67377_78tmt2	821.739	ProSAP2SHANK3	1710	1732	R.S@RSPSPSPLPSPSPGSGPSAGPR.R	1710	0	R.S@RSPSPSPLPSPSPGSGPSAGPR.R	1710	0	182700	174700	1.04579	0.956212
10887	3	Sample#2A	67377_78tmt1	825.414	ProSAP2SHANK3	1710	1732	R.S]@RSPSPSPLPSPSPGSGPSAGPR.R	1710	0	R.S]@RSPSPSPLPSPSPGSGPSAGPR.R	1710	0	209500	256200	0.817721	1.22291
11040	3	Sample#2B	67377_78tmt2	825.414	ProSAP2SHANK3	1710	1732	R.S]@RSPSPSPLPSPSPGSGPSAGPR.R	1710	0	R.S]@RSPSPSPLPSPSPGSGPSAGPR.R	1710	0	182700	174700	1.04579	0.956212
11068	3	Sample#2B	67377_78tmt2	825.414	ProSAP2SHANK3	1710	1732	R.S]@RSPSPSPLPSPSPGSGPSAGPR.R	1710	0	R.S]@RSPSPSPLPSPSPGSGPSAGPR.R	1710	0	182700	174700	1.04579	0.956212
10782	3	Sample#1B	67375_76tmt2	821.739	ProSAP2SHANK3	1710	1732	R.SRS@PSPSPLPSPSPGSGPSAGPR.R	1712	11.015	R.S@RSPSPSPLPSPSPGSGPSAGPR.R	1710	0	105700	152500	0.693115	1.44276
10657	3	Sample#2A	67377_78tmt1	821.739	ProSAP2SHANK3	1710	1732	R.SRS@PSPSPLPSPSPGSGPSAGPR.R	1712	0	R.SRS@PSPSPLPSPSPGSGPSAGPR.R	1712	0	59477	196800	0.302221	3.30884
10883	3	Sample#2A	67377_78tmt1	821.739	ProSAP2SHANK3	1710	1732	R.SRS@PSPSPLPSPSPGSGPSAGPR.R	1712	0	R.SRS@PSPSPLPSPSPGSGPSAGPR.R	1712	0	209500	256200	0.817721	1.22291
11954	3	Sample#1A	67375_76tmt1	821.739	ProSAP2SHANK3	1710	1732	R.SRSPS@PSPLPSPSPGSGPSAGPR.R	1714	11.015	R.SRSPS@PSPLPSPSPGSGPSAGPR.R	1714	4.595	25606.4	93201	0.274744	3.63975
10798	3	Sample#1B	67375_76tmt2	821.739	ProSAP2SHANK3	1710	1732	R.SRSPS@PSPLPSPSPGSGPSAGPR.R	1714	6.91	R.SRS@PSPSPLPSPSPGSGPSAGPR.R	1712	0	105700	152500	0.693115	1.44276
10765	3	Sample#2B	67377_78tmt2	821.739	ProSAP2SHANK3	1710	1732	R.SRSPS@PSPLPSPSPGSGPSAGPR.R	1714	13.208	R.S@RSPSPSPLPSPSPGSGPSAGPR.R	1710	4.595	45266.1	190700	0.237368	4.21287

## Sheet: Figure 2F
repeat 1	2018-04-09						repeat 6	2021-12-03
Condition	Phospho signal	Total signal	P/T ratio	Normalized to Un			Condition	Phospho signal	Total signal	P/T ratio	Normalized to Un
Un	745000	1070000	0.696262	1			Un	769785	5168708	0.148932	1
TTX	186000	1110000	0.167568	0.240668			PTX	2180417	8027285	0.271626	1.82383
PTX	1360000	1280000	1.0625	1.52601
repeat 2	2018-04-12						repeat 7	2021-12-16
Condition	Phospho signal	Total signal	P/T ratio	Normalized to Un			Condition	Phospho signal	Total signal	P/T ratio	Normalized to Un
Un	770000	613000	1.25612	1.00009			Un	389060	3164453	0.122947	1
TTX	392000	822000	0.476886	0.379686			PTX	514471	3345116	0.153798	1.25093
PTX	1280000	568000	2.25352	1.7942
repeat 3	2018-04-19						repeat 8	2022-01-13
Condition	Phospho signal	Total signal	P/T ratio	Normalized to Un			Condition	Phospho signal	Total signal	P/T ratio	Normalized to Un
Un	561000	1110000	0.505405	1.0008			Un	280803	2271549	0.123617	1
TTX	243000	1480000	0.164189	0.325127			PTX	361940	2104782	0.171961	1.39107
PTX	1430000	1750000	0.817143	1.6181
repeat 4	2020-07-28						repeat 9	2022-01-28
Condition	Phospho signal	Total signal	P/T ratio	Normalized to Un			Condition	Phospho signal	Total signal	P/T ratio	Normalized to Un
Un	418859	5002688	0.0837268	1			Un	113262	3255703	0.0347888	1
TTX	276093	6.83836e+06	0.0403741	0.482213			PTX	286926	3712822	0.0772798	2.22138
PTX	479880	7.15815e+06	0.0670397	0.800695
repeat 5	2020-07-28						repeat 10	2022-02-24
Condition	Phospho signal	Total signal	P/T ratio	Normalized to Un			Condition	Phospho signal	Total signal	P/T ratio	Normalized to Un
Un	334399	7.27901e+06	0.0459402	1			Un	280880	2511257	0.111848	1
TTX	128166	4.87828e+06	0.0262729	0.571893			PTX	471225	3681047	0.128014	1.14453
PTX	501802	7.96486e+06	0.063002	1.37139

## Sheet: Figure 2G
repeat 1	2018-02-27
Condition	Phospho signal	Total signal	P/T ratio	Normalized to Un
Un	344000	330000	1.04242	1
TTX	175000	338000	0.517751	0.49668
PTX	742000	624000	1.1891	1.14071
repeat 2	2018-02-27
Condition	Phospho signal	Total signal	P/T ratio	Normalized to Un
Un	410000	838000	0.48926	1
TTX	290000	919000	0.31556	0.644975
PTX	758000	804000	0.942786	1.92696
repeat 3	2018-03-15
Condition	Phospho signal	Total signal	P/T ratio	Normalized to Un
Un	763000	874000	0.872998	1.00011
TTX	96800	736000	0.131522	0.150672
PTX	473000	660000	0.716667	0.821018
repeat 4	2018-03-23
Condition	Phospho signal	Total signal	P/T ratio	Normalized to Un
Un	1390000	2130000	0.652582	1.00013
TTX	169000	1290000	0.131008	0.200778
PTX	970000	1620000	0.598765	0.917648
repeat 5	2018-03-27
Condition	Phospho signal	Total signal	P/T ratio	Normalized to Un
Un	1650000	1340000	1.23134	1
TTX	502000	1360000	0.369118	0.299768
PTX	1510000	1260000	1.19841	0.973256
repeat 6	2018-04-09
Condition	Phospho signal	Total signal	P/T ratio	Normalized to Un
Un	1950000	2150000	0.906977	0.999974
TTX	323000	1780000	0.181461	0.200067
PTX	1300000	1830000	0.710383	0.783222
repeat 7	2018-04-12
Condition	Phospho signal	Total signal	P/T ratio	Normalized to Un
Un	1330000	1060000	1.25472	1.00001
TTX	337000	921000	0.365907	0.291629
PTX	1140000	948000	1.20253	0.958422
