# Supplementary material for: A bidirectional switch in the Shank3 phosphorylation state biases synapses toward up- or downscaling
Source: eLife. 2022 Apr 26;11:e74277. doi: 10.7554/eLife.74277 (PMC9084893; doi:10.7554/eLife.74277)
Supplement: Figure 3—source data 1. [file elife-74277-fig3-data1.xlsx]

## Sheet: Figure 3B
Cond	Instantaneous rate	Genotype	Cellid	Cond	Instantaneous rate	Genotype	Cellid	Cond	Instantaneous rate	Genotype	Cellid
1	0.809331	CNTL-Glua2	1	2	0.900837	TTX-GluA2	81	3	0.67692	PTX-GluA2	124
1	0.97445	CNTL-Glua2	2	2	1.49379	TTX-GluA2	82	3	0.444358	PTX-GluA2	125
1	0.980337	CNTL-Glua2	3	2	3.8966	TTX-GluA2	83	3	0.694542	PTX-GluA2	126
1	0.616784	CNTL-Glua2	4	2	1.01692	TTX-GluA2	84	3	0.496524	PTX-GluA2	127
1	1.02883	CNTL-Glua2	5	2	2.11892	TTX-GluA2	85	3	0.628976	PTX-GluA2	128
1	1.09648	CNTL-Glua2	6	2	3.44152	TTX-GluA2	86	3	0.515065	PTX-GluA2	129
1	1.06949	CNTL-Glua2	7	2	0.97117	TTX-GluA2	87	3	0.938554	PTX-GluA2	130
1	1.1934	CNTL-Glua2	8	2	0	TTX-GluA2	88	3	0.782356	PTX-GluA2	131
1	0.932707	CNTL-Glua2	9	2	0	TTX-GluA2	89	3	0.957479	PTX-GluA2	132
1	0.552665	CNTL-Glua2	10	2	0	TTX-GluA2	90	3	0.902596	PTX-GluA2	133
1	0.841108	CNTL-Glua2	11	2	1.08702	TTX-GluA2	91	3	0.750314	PTX-GluA2	134
1	0.996489	CNTL-Glua2	12	2	2.4286	TTX-GluA2	92	3	0.81408	PTX-GluA2	135
1	1.1596	CNTL-Glua2	13	2	1.29279	TTX-GluA2	93	3	0.720123	PTX-GluA2	136
1	1.05162	CNTL-Glua2	14	2	0.699784	TTX-GluA2	94	3	0.63042	PTX-GluA2	137
1	1.95498	CNTL-Glua2	15	2	2.53065	TTX-GluA2	95	3	0.747366	PTX-GluA2	138
1	0.755103	CNTL-Glua2	16	2	1.97715	TTX-GluA2	96	3	1.20853	PTX-GluA2	139
1	0.986624	CNTL-Glua2	17	2	1.50487	TTX-GluA2	97	3	0.744603	PTX-GluA2	140
1	0.90732	CNTL-Glua2	18	2	1.42714	TTX-GluA2	98	3	0.717585	PTX-GluA2	141
1	1.07547	CNTL-Glua2	19	2	2.60879	TTX-GluA2	99	3	0.912682	PTX-GluA2	142
1	0.637198	CNTL-Glua2	20	2	2.02349	TTX-GluA2	100	3	1.09757	PTX-GluA2	143
1	1.07619	CNTL-Glua2	21	2	0.933757	TTX-GluA2	101	3	1.05522	PTX-GluA2	144
1	0.816521	CNTL-Glua2	22	2	2.54154	TTX-GluA2	102	3	0.781026	PTX-GluA2	145
1	1.48024	CNTL-Glua2	23	2	1.75718	TTX-GluA2	103	3	1.69219	PTX-GluA2	146
1	0.937212	CNTL-Glua2	24	2	0.925941	TTX-GluA2	104	3	0.586407	PTX-GluA2	147
1	0.761672	CNTL-Glua2	25	2	0.774102	TTX-GluA2	105	3	0.598502	PTX-GluA2	148
1	1.35702	CNTL-Glua2	26	2	0.923092	TTX-GluA2	106	3	0.804135	PTX-GluA2	149
1	0.728821	CNTL-Glua2	27	2	0.763782	TTX-GluA2	107	3	0.948363	PTX-GluA2	150
1	0.948119	CNTL-Glua2	28	2	2.35129	TTX-GluA2	108	3	0.925296	PTX-GluA2	151
1	1.27421	CNTL-Glua2	29	2	1.44051	TTX-GluA2	109	3	0.783219	PTX-GluA2	152
1	0.625901	CNTL-Glua2	30	2	5.02006	TTX-GluA2	110
1	0.89135	CNTL-Glua2	31	2	0.786969	TTX-GluA2	111
1	0.87483	CNTL-Glua2	32	2	0.586166	TTX-GluA2	112
1	1.80739	CNTL-Glua2	33	2	0.703639	TTX-GluA2	113
1	0.924914	CNTL-Glua2	34	2	1.0861	TTX-GluA2	114
1	0.830506	CNTL-Glua2	35	2	2.84125	TTX-GluA2	115
1	0.852281	CNTL-Glua2	36	2	1.42686	TTX-GluA2	116
1	1.19283	CNTL-Glua2	37	2	1.82931	TTX-GluA2	117
1	0.448496	CNTL-Glua2	38	2	2.15577	TTX-GluA2	118
1	1.75312	CNTL-Glua2	39	2	0.678119	TTX-GluA2	119
1	0.92501	CNTL-Glua2	40	2	1.16883	TTX-GluA2	120
1	2.37289	CNTL-Glua2	41	2	2.87162	TTX-GluA2	121
1	1.36674	CNTL-Glua2	42	2	0.625209	TTX-GluA2	122
1	0	CNTL-Glua2	43	2	0.750891	TTX-GluA2	123
1	1.13494	CNTL-Glua2	44
1	0.841627	CNTL-Glua2	45
1	0.46708	CNTL-Glua2	46
1	0.697273	CNTL-Glua2	47
1	0.761191	CNTL-Glua2	48
1	1.14253	CNTL-Glua2	49
1	1.20296	CNTL-Glua2	50
1	1.39844	CNTL-Glua2	51
1	2.02349	CNTL-Glua2	52
1	0.19521	CNTL-Glua2	53
1	0.669427	CNTL-Glua2	54
1	0.829438	CNTL-Glua2	55
1	0.662598	CNTL-Glua2	56
1	1.26478	CNTL-Glua2	57
1	2.35856	CNTL-Glua2	58
1	0.783969	CNTL-Glua2	59
1	0.562184	CNTL-Glua2	60
1	0.961696	CNTL-Glua2	61
1	0.55792	CNTL-Glua2	62
1	0.953475	CNTL-Glua2	63
1	1.92142	CNTL-Glua2	64
1	0	CNTL-Glua2	65
1	1.3602	CNTL-Glua2	66
1	0.678606	CNTL-Glua2	67
1	0	CNTL-Glua2	68
1	1.87819	CNTL-Glua2	69
1	0.710697	CNTL-Glua2	70
1	2.4045	CNTL-Glua2	71
1	1.12134	CNTL-Glua2	72
1	0.590444	CNTL-Glua2	73
1	0.734911	CNTL-Glua2	74
1	0.728208	CNTL-Glua2	75
1	1.27925	CNTL-Glua2	76
1	0.855705	CNTL-Glua2	77
1	0.62351	CNTL-Glua2	78
1	0.736873	CNTL-Glua2	79
1	1.04109	CNTL-Glua2	80

## Sheet: Figure 3C
Cond	Instantaneous rate	Genotype	Cellid	Cond	Instantaneous rate	Genotype	Cellid	Cond	Instantaneous rate	Genotype	Cellid
4	0.684481	CNTL-Shank3	153	5	0.596076	TTX-Shank3	233		6	0.956445	PTX-Shank3	276
4	1.20984	CNTL-Shank3	154	5	1.13089	TTX-Shank3	234		6	0.304845	PTX-Shank3	277
4	1.29031	CNTL-Shank3	155	5	3.24717	TTX-Shank3	235		6	0.421191	PTX-Shank3	278
4	0.650824	CNTL-Shank3	156	5	0.83597	TTX-Shank3	236		6	0.323702	PTX-Shank3	279
4	0.547945	CNTL-Shank3	157	5	0.502747	TTX-Shank3	237		6	0.806469	PTX-Shank3	280
4	1.05078	CNTL-Shank3	158	5	3.57638	TTX-Shank3	238		6	0.415926	PTX-Shank3	281
4	1.07187	CNTL-Shank3	159	5	0.405711	TTX-Shank3	239		6	0.982267	PTX-Shank3	282
4	1.1683	CNTL-Shank3	160	5	0	TTX-Shank3	240		6	1.00458	PTX-Shank3	283
4	1.04983	CNTL-Shank3	161	5	0	TTX-Shank3	241		6	0.735749	PTX-Shank3	284
4	0.655278	CNTL-Shank3	162	5	0	TTX-Shank3	242		6	1.64194	PTX-Shank3	285
4	1.09599	CNTL-Shank3	163	5	1.08696	TTX-Shank3	243		6	0.66648	PTX-Shank3	286
4	0.690958	CNTL-Shank3	164	5	1.55716	TTX-Shank3	244		6	0.805629	PTX-Shank3	287
4	1.01907	CNTL-Shank3	165	5	2.00788	TTX-Shank3	245		6	1.01368	PTX-Shank3	288
4	1.48276	CNTL-Shank3	166	5	1.5799	TTX-Shank3	246		6	0.529683	PTX-Shank3	289
4	1.68387	CNTL-Shank3	167	5	1.57542	TTX-Shank3	247		6	0.589152	PTX-Shank3	290
4	0.761382	CNTL-Shank3	168	5	1.57299	TTX-Shank3	248		6	1.00704	PTX-Shank3	291
4	0.88653	CNTL-Shank3	169	5	1.07466	TTX-Shank3	249		6	0.526291	PTX-Shank3	292
4	0.972154	CNTL-Shank3	170	5	2.72037	TTX-Shank3	250		6	0.550237	PTX-Shank3	293
4	0.941587	CNTL-Shank3	171	5	2.8415	TTX-Shank3	251		6	0.868564	PTX-Shank3	294
4	0.636803	CNTL-Shank3	172	5	3.62278	TTX-Shank3	252		6	1.01618	PTX-Shank3	295
4	0.954239	CNTL-Shank3	173	5	0.369176	TTX-Shank3	253		6	1.20826	PTX-Shank3	296
4	0.86668	CNTL-Shank3	174	5	3.17618	TTX-Shank3	254		6	0.448736	PTX-Shank3	297
4	1.32932	CNTL-Shank3	175	5	1.13454	TTX-Shank3	255		6	1.15145	PTX-Shank3	298
4	0.888723	CNTL-Shank3	176	5	0.455011	TTX-Shank3	256		6	0.411493	PTX-Shank3	299
4	0.678228	CNTL-Shank3	177	5	0.748925	TTX-Shank3	257		6	0.407755	PTX-Shank3	300
4	1.25481	CNTL-Shank3	178	5	1.07256	TTX-Shank3	258		6	0.483598	PTX-Shank3	301
4	0.893305	CNTL-Shank3	179	5	0.827642	TTX-Shank3	259		6	0.783641	PTX-Shank3	302
4	1.2603	CNTL-Shank3	180	5	3.41468	TTX-Shank3	260		6	0.696522	PTX-Shank3	303
4	1.32385	CNTL-Shank3	181	5	0.691191	TTX-Shank3	261		6	0.485576	PTX-Shank3	304
4	0.727386	CNTL-Shank3	182	5	3.14961	TTX-Shank3	262
4	0.770272	CNTL-Shank3	183	5	1.04827	TTX-Shank3	263
4	0.536824	CNTL-Shank3	184	5	2.14048	TTX-Shank3	264
4	1.70628	CNTL-Shank3	185	5	0.716349	TTX-Shank3	265
4	0.900463	CNTL-Shank3	186	5	1.29371	TTX-Shank3	266
4	0.822795	CNTL-Shank3	187	5	3.50999	TTX-Shank3	267
4	0.935446	CNTL-Shank3	188	5	1.43136	TTX-Shank3	268
4	1.60053	CNTL-Shank3	189	5	2.13339	TTX-Shank3	269
4	0.257714	CNTL-Shank3	190	5	3.51346	TTX-Shank3	270
4	0.75964	CNTL-Shank3	191	5	0.610696	TTX-Shank3	271
4	0.478625	CNTL-Shank3	192	5	1.22115	TTX-Shank3	272
4	1.69469	CNTL-Shank3	193	5	2.6019	TTX-Shank3	273
4	0.784345	CNTL-Shank3	194	5	0.708828	TTX-Shank3	274
4	0	CNTL-Shank3	195	5	1.1062	TTX-Shank3	275
4	0.856959	CNTL-Shank3	196
4	1.35643	CNTL-Shank3	197
4	0.264022	CNTL-Shank3	198
4	0.605185	CNTL-Shank3	199
4	0.657514	CNTL-Shank3	200
4	0.92354	CNTL-Shank3	201
4	1.76954	CNTL-Shank3	202
4	0.957067	CNTL-Shank3	203
4	3.62278	CNTL-Shank3	204
4	0.271504	CNTL-Shank3	205
4	0.809879	CNTL-Shank3	206
4	1.02628	CNTL-Shank3	207
4	0.708787	CNTL-Shank3	208
4	2.02349	CNTL-Shank3	209
4	0.984844	CNTL-Shank3	210
4	0.442181	CNTL-Shank3	211
4	1.09537	CNTL-Shank3	212
4	0.671653	CNTL-Shank3	213
4	0.606761	CNTL-Shank3	214
4	1.15906	CNTL-Shank3	215
4	3.46695	CNTL-Shank3	216
4	0	CNTL-Shank3	217
4	1.1973	CNTL-Shank3	218
4	0.508245	CNTL-Shank3	219
4	0	CNTL-Shank3	220
4	1.60002	CNTL-Shank3	221
4	0.911519	CNTL-Shank3	222
4	2.55998	CNTL-Shank3	223
4	0.561088	CNTL-Shank3	224
4	0.652783	CNTL-Shank3	225
4	1.11473	CNTL-Shank3	226
4	0.48224	CNTL-Shank3	227
4	1.07176	CNTL-Shank3	228
4	0.804537	CNTL-Shank3	229
4	1.10223	CNTL-Shank3	230
4	0.467755	CNTL-Shank3	231
4	1.711	CNTL-Shank3	232

## Sheet: Figure 3E
Experiment repeat	Cell	Condition	Raw intensity	Normalized intensity	Cell	Condition	Raw intensity	Normalized intensity	Cell	Condition	Raw intensity	Normalized intensity
repeat 1 (3/20)	1	WT	322721	1.05787	1	AA	307514	1.00802	1	DD	327821	1.07459
repeat 1 (3/20)	2	WT	449301	1.4728	2	AA	390494	1.28003
repeat 1 (3/20)	3	WT	370361	1.21403	3	AA	156670	0.51356
repeat 1 (3/20)	4	WT	144515	0.473715
repeat 1 (3/20)	5	WT	238438	0.781593
repeat 2 (3/25)	6	WT	231738	1.35568	4	AA	191115	1.11803	2	DD	510544	2.98671
repeat 2 (3/25)	7	WT	183207	1.07177	5	AA	340431	1.99154	3	DD	131480	0.76916
repeat 2 (3/25)	8	WT	97871.6	0.572553
repeat 3 (4/9)	9	WT	276872	1.05761	6	AA	288773	1.10307	4	DD	148916	0.568836
repeat 3 (4/9)	10	WT	451464	1.72453	7	AA	173879	0.664194	5	DD	251097	0.959155
repeat 3 (4/9)	11	WT	109703	0.419049	8	AA	518080	1.97899	6	DD	249219	0.951981
repeat 3 (4/9)	12	WT	88415.8	0.337736					7	DD	70214.4	0.268209
repeat 3 (4/9)	13	WT	388675	1.48468					8	DD	89159.8	0.340578
repeat 3 (4/9)	14	WT	235200	0.898428					9	DD	144856	0.55333
repeat 3 (4/9)	15	WT	282203	1.07798
repeat 4(4/8)	16	WT	45158.2	0.401221	9	AA	77742.1	0.690722	10	DD	38111.3	0.33861
repeat 4(4/8)	17	WT	41032.4	0.364564	10	AA	58943.8	0.523702	11	DD	70155	0.623311
repeat 4(4/8)	18	WT	251467	2.23423	11	AA	187408	1.66508
repeat 5 (12/6)	19	WT	223518	1.03496	12	AA	83883.8	0.388408	12	DD	72522.5	0.335802
repeat 5 (12/6)	20	WT	90716	0.420044	13	AA	210175	0.973177	13	DD	475647	2.2024
repeat 5 (12/6)	21	WT	209506	0.970079	14	AA	117583	0.544445	14	DD	86597.1	0.400972
repeat 5 (12/6)	22	WT	138754	0.642473	15	AA	347419	1.60866	15	DD	221665	1.02638
repeat 5 (12/6)	23	WT	284615	1.31786	16	AA	77891	0.36066	16	DD	93384.7	0.432401
repeat 5 (12/6)	24	WT	348705	1.61462	17	AA	96718.5	0.447837
repeat 6 (1/24)	25	WT	217512	1.9891	18	AA	178108	1.62876	17	DD	58654.2	0.536381
repeat 6 (1/24)	26	WT	75567.4	0.691048	19	AA	138064	1.26257	18	DD	95875.2	0.876759
repeat 6 (1/24)	27	WT	65898.5	0.602628	20	AA	212217	1.94068
repeat 6 (1/24)	28	WT	43402.5	0.396907	21	AA	160458	1.46735
repeat 6 (1/24)	29	WT	132540	1.21206	22	AA	134972	1.23429
repeat 6 (1/24)	30	WT	126617	1.15789
repeat 6 (1/24)	31	WT	103925	0.950368
repeat 7 (2/29)	32	WT	192112	0.838009	23	AA	252513	1.10148	19	DD	92753.8	0.404599
repeat 7 (2/29)	33	WT	266384	1.16199	24	AA	74510.5	0.325021	20	DD	207998	0.907306
repeat 7 (2/29)					25	AA	250705	1.09359	21	DD	104108	0.454128
repeat 7 (2/29)					26	AA	430177	1.87647	22	DD	69312.3	0.302346
repeat 7 (2/29)					27	AA	245237	1.06974	23	DD	92788.6	0.404752
repeat 7 (2/29)					28	AA	356738	1.55612	24	DD	114335	0.498739
repeat 7 (2/29)					29	AA	84916.4	0.370412
repeat 7 (2/29)					30	AA	125996	0.549604

## Sheet: Figure 3F
Experiment repeat	Cell	Condition	Count	Length	Density	Normalized density	Cell	Condition	Count	Length	Density	Normalized density	Cell	Condition	Count	Length	Density	Normalized density
repeat 1 (3/20)	1	WT	41	424.946	0.096483	0.575743	1	AA	29	238.433	0.121627	0.725787	1	DD	24	315.669	0.0760291	0.453688
repeat 1 (3/20)	2	WT	64	415.152	0.154161	0.919922	2	AA	51	375.836	0.135698	0.809748
repeat 1 (3/20)	3	WT	122	368.155	0.331383	1.97746	3	AA	52	214.429	0.242504	1.4471
repeat 1 (3/20)	4	WT	44	238.211	0.18471	1.10222
repeat 1 (3/20)	5	WT	23	323.092	0.0711872	0.424796
repeat 2 (3/25)	6	WT	36	688.503	0.0522873	0.940436	4	AA	19	273.668	0.0694272	1.24871	2	DD	43	371.696	0.115686	2.08072
repeat 2 (3/25)	7	WT	17	288.569	0.0589113	1.05958	5	AA	61	393.004	0.155215	2.79168	3	DD	10	185.612	0.0538759	0.969008
repeat 2 (3/25)
repeat 3 (4/9)	8	WT	21	87.6663	0.239545	0.276196	6	AA	12	67.1534	0.178695	0.206037	4	DD	39	68.6836	0.567821	0.6547
repeat 3 (4/9)	9	WT	87	43.4829	2.00079	2.30692	7	AA	106	76.9613	1.37731	1.58805	5	DD	61	54.1156	1.12722	1.29968
repeat 3 (4/9)	10	WT	24	64.6514	0.371222	0.42802	8	AA	53	69.3233	0.764534	0.88151	6	DD	29	55.1836	0.525519	0.605925
repeat 3 (4/9)	11	WT	25	48.9652	0.510567	0.588686							7	DD	16	56.5158	0.283107	0.326423
repeat 3 (4/9)	12	WT	123	108.73	1.13124	1.30433							8	DD	6	57.9026	0.103622	0.119477
repeat 3 (4/9)	13	WT	57	71.3477	0.798904	0.921139							9	DD	22	61.8247	0.355845	0.41029
repeat 3 (4/9)	14	WT	93	91.302	1.0186	1.17445
repeat 4(4/8)	15	WT	63	174.766	0.360481	1.13788	9	AA	98	331.44	0.29568	0.933332	10	DD	155	335.945	0.461385	1.45639
repeat 4(4/8)	16	WT	134	400.706	0.33441	1.05559	10	AA	161	362.186	0.444523	1.40317	11	DD	111	230.482	0.481599	1.5202
repeat 4(4/8)	17	WT	127	496.741	0.255666	0.807028	11	AA	344	356.148	0.96589	3.0489
repeat 5 (12/6)	18	WT	12	294.739	0.040714	0.987123	12	AA	32	439.866	0.0727495	1.76383	12	DD	10	344.925	0.0289918	0.702914
repeat 5 (12/6)	19	WT	4	200.804	0.0199199	0.482964	13	AA	11	275.119	0.0399826	0.96939	13	DD	13	217.867	0.0596693	1.4467
repeat 5 (12/6)	20	WT	4	328.558	0.0121744	0.295172	14	AA	24	319.68	0.075075	1.82021	14	DD	18	478.288	0.0376342	0.912452
repeat 5 (12/6)	21	WT	11	334.346	0.0329001	0.797671	15	AA	12	238.331	0.0503502	1.22075	15	DD	31	340.306	0.0910945	2.20861
repeat 5 (12/6)	22	WT	7	484.643	0.0144436	0.350189	16	AA	9	306.267	0.0293861	0.712474	16	DD	16	354.495	0.0451347	1.0943
repeat 5 (12/6)	23	WT	35	274.9	0.127319	3.08688	17	AA	20	428.181	0.0467093	1.13248
repeat 6 (1/24)	24	WT	107	409.745	0.261138	2.21811	18	AA	78	244.303	0.319276	2.71193	17	DD	10	251.434	0.0397719	0.337823
repeat 6 (1/24)	25	WT	34	341.123	0.0996709	0.846604	19	AA	42	373.253	0.112524	0.955781	18	DD	17	311.985	0.0544899	0.462837
repeat 6 (1/24)	26	WT	28	329.619	0.0849466	0.721536	20	AA	67	316.24	0.211864	1.79957
repeat 6 (1/24)	27	WT	13	323.652	0.0401666	0.341175	21	AA	32	291.744	0.109685	0.931667
repeat 6 (1/24)	28	WT	14	280.284	0.0499493	0.424269	22	AA	40	416.84	0.0959601	0.815085
repeat 6 (1/24)	29	WT	26	325.663	0.079837	0.678135
repeat 6 (1/24)	30	WT	62	297.501	0.208403	1.77017
repeat 7 (2/29)	31	WT	7	222.889	0.0314057	0.465435	23	AA	73	482.507	0.151293	2.24217	19	DD	29	458.454	0.0632561	0.937459
repeat 7 (2/29)	32	WT	40	386.3	0.103546	1.53456	24	AA	13	513.582	0.0253124	0.375132	20	DD	19	440.638	0.0431193	0.639031
repeat 7 (2/29)							25	AA	36	249.266	0.144424	2.14037	21	DD	19	369.022	0.0514875	0.763048
repeat 7 (2/29)							26	AA	9	415.369	0.0216675	0.321114	22	DD	7	211.946	0.0330273	0.489467
repeat 7 (2/29)							27	AA	15	533.793	0.0281008	0.416456	23	DD	14	301.214	0.0464786	0.688816
repeat 7 (2/29)							28	AA	21	464.045	0.0452542	0.670671	24	DD	53	410.325	0.129166	1.91425
repeat 7 (2/29)							29	AA	7	363.907	0.0192357	0.285074
repeat 7 (2/29)							30	AA	21	409.655	0.0512626	0.759715
