# Supplementary material for: A bidirectional switch in the Shank3 phosphorylation state biases synapses toward up- or downscaling
Source: eLife. 2022 Apr 26;11:e74277. doi: 10.7554/eLife.74277 (PMC9084893; doi:10.7554/eLife.74277)
Supplement: Figure 4—figure supplement 1—source data 1. [file elife-74277-fig4-figsupp1-data1.xlsx]

## Sheet: Figure S4B
repeat 1	2018-09-25
Condition	Phospho signal	Total signal	P/T ratio	Normalized to Un
Un	372570	235237	1.58381	1
OKA	2.25229e+06	218338	10.3156	6.513
TTX	114030	214206	0.532338	0.336114
TTX/OKA	1.51905e+06	181494	8.3697	5.284
repeat 2	2018-10-02
Condition	Phospho signal	Total signal	P/T ratio	Normalized to Un
Un	34219.7	879017	0.0389295	1
OKA	196574	450697	0.436157	11.2038
TTX	38538.7	1.49969e+06	0.0256977	0.66011
TTX/OKA	401847	703413	0.571282	14.6748
repeat 3	08/252020
Condition	Phospho signal	Total signal	P/T ratio	Normalized to Un
Un	184932	615310	0.300552	1
OKA	1.81191e+06	1.31833e+06	1.3744	4.57292
TTX	336571	1.3936e+06	0.241511	0.80356
TTX/OKA	1.32792e+06	1.05134e+06	1.26307	4.2025
