# Supplementary material for: A bidirectional switch in the Shank3 phosphorylation state biases synapses toward up- or downscaling
Source: eLife. 2022 Apr 26;11:e74277. doi: 10.7554/eLife.74277 (PMC9084893; doi:10.7554/eLife.74277)
Supplement: Figure 4—source data 1. [file elife-74277-fig4-data1.xlsx]

## Sheet: Figure 4C
repeat 1	2021-12-03						repeat 4	2022-01-28
Condition	Phospho signal	Total signal	P/T ratio	Normalized to Un			Condition	Phospho signal	Total signal	P/T ratio	Normalized to Un
Un	769785	5168708	0.148932	1			Un	113262	3255703	0.0347888	1
KN62	1357312	10268140	0.132187	0.887566			KN62	199812	4104253	0.0486842	1.39941
KN93	787522	10339308	0.0761678	0.511427			KN93	136037	3144060	0.0432679	1.24372
H89	1096953	8998281	0.121907	0.818542			H89	104976	3747588	0.0280116	0.805185
PTX	2180417	8027285	0.271626	1.82383			PTX	286926	3712822	0.0772798	2.22138
PTX+KN62	1037907	7895374	0.131458	0.88267			PTX+KN62	123918	3381124	0.0366498	1.05349
PTX+KN93	387142	9540099	0.0405805	0.272477			PTX+KN93	56585.1	3406732	0.0166098	0.477443
PTX+H89	670473	8988697	0.0745907	0.500838			PTX+H89	67537.2	3345305	0.0201886	0.580317
repeat 2	2021-12-16						repeat 5	2022-02-24
Condition	Phospho signal	Total signal	P/T ratio	Normalized to Un			Condition	Phospho signal	Total signal	P/T ratio	Normalized to Un
Un	389060	3164453	0.122947	1			Un	280880	2511257	0.111848	1
KN62	345760	3633381	0.0951621	0.774009			KN62	232835	3370587	0.0690784	0.617608
KN93	256023	3633795	0.0704561	0.57306			KN93	195251	3695947	0.0528284	0.472321
H89	337490	3802813	0.0887474	0.721834			H89	271334	2752210	0.0985877	0.88144
PTX	514471	3345116	0.153798	1.25093			PTX	471225	3681047	0.128014	1.14453
PTX+KN62	293519	3224027	0.0910412	0.740492			PTX+KN62	234904	3050238	0.0770115	0.688535
PTX+KN93	178505	3966907	0.0449984	0.365999			PTX+KN93	130036	3345079	0.0388739	0.347559
PTX+H89	248927	4582804	0.0543177	0.441798			PTX+H89	155094	2385713	0.0650094	0.581228
repeat 3	2022-01-13
Condition	Phospho signal	Total signal	P/T ratio	Normalized to Un
Un	280803	2271549	0.123617	1
KN62	317694	2239186	0.141879	1.14773
KN93	297084	2543719	0.116791	0.944782
H89	265898	3020059	0.0880439	0.71223
PTX	361940	2104782	0.171961	1.39107
PTX+KN62	284692	2654198	0.107261	0.867686
PTX+KN93	362528	2691286	0.134704	1.08969
PTX+H89	261737	2294206	0.114086	0.922899

## Sheet: Figure 4D
Date	Ctrl avgs	TTX avgs
2020-09-07	0.1753	0.11935
2020-09-14	0.4398	0.3126
2020-09-24	0.3243	0.251
2020-09-24	0.3371	0.2296
2020-09-24	0.2964	0.1988

## Sheet: Figure 4E
Ctrl avgs	TTX avgs	amount of protein (ug)
0.27405	0.3187	100
0.3913	0.64015	100
0.19115	0.3105	100
0.2154	0.31975	100
0.3799	0.43985	100
0.42745	0.43785	100
0.37575	0.506	100

## Sheet: Figure 4H
repeat 1	2018-09-01
Condition	Phospho signal	Total signal	P/T ratio	Normalized to Un
Un	5480	17100	0.320468	1
OKA	1880	5580	0.336918	1.05133
TTX	1590	9670	0.164426	0.513081
TTX/OKA	1660	10500	0.158095	0.493326
repeat 2	2018-09-11
Condition	Phospho signal	Total signal	P/T ratio	Normalized to Un
Un	334649	802010	0.417263	1
OKA	156681	1510519	0.103727	0.248588
TTX	173082	807840	0.214253	0.513471
TTX/OKA	202131	1542190	0.131068	0.314113
repeat 3	2018-09-18
Condition	Phospho signal	Total signal	P/T ratio	Normalized to Un
Un	168124	311863	0.539097	1
OKA	149742	303320	0.493676	0.915746
TTX	52398.2	183040	0.286266	0.531011
TTX/OKA	110293	227131	0.485592	0.900751
repeat 4	2020-08-28
Condition	Phospho signal	Total signal	P/T ratio	Normalized to Un
Un	498749	684028	0.729135	1
OKA	564827	1.2998e+06	0.43455	0.59598
TTX	355235	1.60422e+06	0.221439	0.3037
TTX/OKA	480307	1.54104e+06	0.311678	0.427463
repeat 5	2020-08-28
Condition	Phospho signal	Total signal	P/T ratio	Normalized to Un
Un	774292	1.63472e+06	0.473655	1
OKA	556995	1.59821e+06	0.348511	0.735791
TTX	344409	1.15333e+06	0.298622	0.630463
TTX/OKA	538883	1.41922e+06	0.379703	0.801645

## Sheet: Figure 4I
repeat 1	2018-02-21			repeat 2	2018-02-27
Condition	P/T ratio	Normalized to Un		Condition	Normalized to Un
Un	0.11	1		Un	1
OKA	0.15	1.36364		OKA	1.24
TTX	0.05	0.454545		TTX	0.42
TTX/OKA	0.26	2.36364		TTX/OKA	1.17
repeat 3	2018-02-27
Condition	Phospho signal	Total signal	P/T ratio	Normalized to Un
Un	213000	345000	0.617391	1
OKA	304000	531000	0.572505	0.927
TTX	100000	309000	0.323625	0.52
TTX/OKA	109000	283000	0.385159	0.624
repeat 4	2018-03-15
Condition	Phospho signal	Total signal	P/T ratio	Normalized to Un
Un	763000	874000	0.872998	1
OKA	243000	741000	0.327935	0.375643
TTX	96800	736000	0.131522	0.150655
TTX/OKA	291000	793000	0.366961	0.420346
repeat 5	2018-03-23
Condition	Phospho signal	Total signal	P/T ratio	Normalized to Un
Un	1390000	2130000	0.652582	1
OKA	1100000	1700000	0.647059	0.991536
TTX	169000	1290000	0.131008	0.200753
TTX/OKA	968000	1800000	0.537778	0.824077
repeat 6	2018-03-31
Condition	Phospho signal	Total signal	P/T ratio	Normalized to Un
Un	1230000	1220000	1.0082	1
OKA	440000	853000	0.515826	0.511633
TTX	359000	1240000	0.289516	0.287162
TTX/OKA	259000	579000	0.447323	0.443686
repeat 7	2018-06-03
Condition	Phospho signal	Total signal	P/T ratio	Normalized to Un
Un	229000	1930000	0.118653	1
OKA	193000	2310000	0.0835498	0.704153
TTX	53500	1150000	0.0465217	0.392083
TTX/OKA	198000	2800000	0.0707143	0.595976
repeat 8	2018-10-02
Condition	Phospho signal	Total signal	P/T ratio	Normalized to Un
Un	34219.7	879017	0.0389295	1
OKA	94891.9	1.10135e+06	0.0861597	2.21322
TTX	38538.7	1.49969e+06	0.0256977	0.66011
TTX/OKA	59492.6	1.00688e+06	0.0590858	1.51777
