# Supplementary material for: A bidirectional switch in the Shank3 phosphorylation state biases synapses toward up- or downscaling
Source: eLife. 2022 Apr 26;11:e74277. doi: 10.7554/eLife.74277 (PMC9084893; doi:10.7554/eLife.74277)
Supplement: Figure 5—figure supplement 1—source data 1. [file elife-74277-fig5-figsupp1-data1.xlsx]

## Sheet: Figure S5B
Experiment repeat	Cell	Condition	Raw intensity	Normalized intensity	Cell	Condition	Raw intensity	Normalized intensity	Cell	Condition	Raw intensity	Normalized intensity	Cell	Condition	Raw intensity	Normalized intensity
repeat 1 (6/16/2020)	1	UN	69662.5	0.720881	1	OKA	129008	1.335	1	TTX	97685	1.01086	1	TTX/OKA	126819	1.31235
repeat 1 (6/16/2020)	2	UN	140873	1.45778	2	OKA	248859	2.57524	2	TTX	93180.4	0.964249	2	TTX/OKA	80901.7	0.837186
repeat 1 (6/16/2020)	3	UN	96250	0.996014	3	OKA	163001	1.68676	3	TTX	116938	1.2101	3	TTX/OKA	95151.7	0.984648
repeat 1 (6/16/2020)	4	UN	83019.4	0.8591	4	OKA	139124	1.43968	4	TTX	91719	0.949126	4	TTX/OKA	85092.5	0.880554
repeat 1 (6/16/2020)	5	UN	139966	1.4484	5	OKA	131195	1.35764	5	TTX	139453	1.44309	5	TTX/OKA	53585.8	0.554516
repeat 1 (6/16/2020)	6	UN	91689.6	0.948821	6	OKA	124401	1.28733	6	TTX	135151	1.39857	6	TTX/OKA	107285	1.11021
repeat 1 (6/16/2020)	7	UN	92833.5	0.960659	7	OKA	134295	1.38971	7	TTX	121826	1.26068	7	TTX/OKA	85765	0.887513
repeat 1 (6/16/2020)	8	UN	105699	1.09379	8	OKA	121406	1.25633	8	TTX	120824	1.25031
repeat 1 (6/16/2020)	9	UN	71779.7	0.74279	9	OKA	140952	1.45859
repeat 1 (6/16/2020)	10	UN	74579.5	0.771763	10	OKA	194041	2.00798
repeat 2 (6/17/2020)	11	UN	93746.3	0.836096	11	OKA	92978.6	0.82925	9	TTX	218356	1.94746	8	TTX/OKA	100126	0.892993
repeat 2 (6/17/2020)	12	UN	106301	0.948064	12	OKA	52992	0.472621	10	TTX	183170	1.63364	9	TTX/OKA	110978	0.989784
repeat 2 (6/17/2020)	13	UN	110646	0.986822	13	OKA	122970	1.09673	11	TTX	187002	1.66782	10	TTX/OKA	119173	1.06287
repeat 2 (6/17/2020)	14	UN	107947	0.962746	14	OKA	106708	0.951695	12	TTX	200980	1.79248	11	TTX/OKA	219880	1.96105
repeat 2 (6/17/2020)	15	UN	145611	1.29866	15	OKA	154539	1.37829	13	TTX	220950	1.97059	12	TTX/OKA	147644	1.3168
repeat 2 (6/17/2020)	16	UN	121368	1.08245	16	OKA	169489	1.51162	14	TTX	134313	1.1979	13	TTX/OKA	149694	1.33508
repeat 2 (6/17/2020)	17	UN	114360	1.01995	17	OKA	69999	0.624301	15	TTX	121162	1.08061	14	TTX/OKA	147376	1.3144
repeat 2 (6/17/2020)	18	UN	97005.8	0.865167	18	OKA	86473.5	0.771233	16	TTX	114740	1.02333
repeat 2 (6/17/2020)					19	OKA	171116	1.52614	17	TTX	144622	1.28984
repeat 2 (6/17/2020)									18	TTX	101520	0.905425
repeat 2 (6/17/2020)									19	TTX	135308	1.20677
repeat 2 (6/17/2020)									20	TTX	121922	1.08738
repeat 2 (6/17/2020)									21	TTX	185951	1.65845
repeat 2 (6/17/2020)									22	TTX	185742	1.65658
repeat 3 (6/22/2020)	19	UN	135354	0.993128	20	OKA	306584	2.24949	23	TTX	175696	1.28913	15	TTX/OKA	192209	1.41029
repeat 3 (6/22/2020)	20	UN	162310	1.19091	21	OKA	152996	1.12257	24	TTX	141060	1.035	16	TTX/OKA	181806	1.33396
repeat 3 (6/22/2020)	21	UN	146759	1.07681	22	OKA	130114	0.954682	25	TTX	154798	1.13579
repeat 3 (6/22/2020)	22	UN	131828	0.967261
repeat 3 (6/22/2020)	23	UN	136628	1.00248
repeat 3 (6/22/2020)	24	UN	104863	0.769407
repeat 4 (7/1/2020)	25	UN	137779	0.678231	23	OKA	139600	0.687194	26	TTX	367025	1.80671	17	TTX/OKA	199673	0.982907
repeat 4 (7/1/2020)	26	UN	189939	0.93499	24	OKA	142298	0.700475	27	TTX	248079	1.22119	18	TTX/OKA	158606	0.780753
repeat 4 (7/1/2020)	27	UN	184001	0.905761	25	OKA	169712	0.83542	28	TTX	406720	2.00211	19	TTX/OKA	243582	1.19905
repeat 4 (7/1/2020)	28	UN	204824	1.00826	26	OKA	180280	0.887441	29	TTX	286284	1.40926	20	TTX/OKA	195735	0.963524
repeat 4 (7/1/2020)	29	UN	278915	1.37298	27	OKA	145227	0.71489	30	TTX	355608	1.75051	21	TTX/OKA	199956	0.984303
repeat 4 (7/1/2020)	30	UN	208408	1.02591	28	OKA	179113	0.8817					22	TTX/OKA	182389	0.897824
repeat 4 (7/1/2020)	31	UN	218151	1.07387	29	OKA	313633	1.54388					23	TTX/OKA	189225	0.931477
repeat 4 (7/1/2020)													24	TTX/OKA	123678	0.608816
repeat 4 (7/1/2020)													25	TTX/OKA	194918	0.959501
repeat 4 (7/1/2020)													26	TTX/OKA	198968	0.979436

## Sheet: Figure S5C
Experiment repeat	Cell	Condition	Count	Length	Density	Normalized density	Cell	Condition	Count	Length	Density	Normalized density	Cell	Condition	Count	Length	Density	Normalized density	Cell	Condition	Count	Length	Density	Normalized density
repeat 1 (6/16/2020)	1	UN	15	555.383	0.0270084	0.43172	1	OKA	5	548.9	0.00910912	0.145606	1	TTX	35	449.162	0.0779229	1.24557	1	TTX/OKA	4	357.101	0.0112013	0.179049
repeat 1 (6/16/2020)	2	UN	45	299.82	0.15009	2.39914	2	OKA	6	316.851	0.0189364	0.302691	2	TTX	42	556.55	0.075465	1.20628	2	TTX/OKA	3	366.618	0.0081829	0.130801
repeat 1 (6/16/2020)	3	UN	41	438.548	0.0934903	1.49441	3	OKA	11	543.542	0.0202376	0.323492	3	TTX	66	527.202	0.125189	2.00111	3	TTX/OKA	3	330.34	0.00908154	0.145165
repeat 1 (6/16/2020)	4	UN	17	361.828	0.0469836	0.751017	4	OKA	8	369.188	0.0216692	0.346374	4	TTX	6	340.382	0.0176273	0.281766	4	TTX/OKA	10	616.767	0.0162136	0.259168
repeat 1 (6/16/2020)	5	UN	36	525.851	0.0684604	1.09432	5	OKA	36	476.611	0.0755333	1.20737	5	TTX	66	415.076	0.159007	2.54168	5	TTX/OKA	5	452.212	0.0110568	0.176738
repeat 1 (6/16/2020)	6	UN	21	342.483	0.0613169	0.980129	6	OKA	17	428.898	0.0396365	0.633575	6	TTX	60	334.105	0.179584	2.87059	6	TTX/OKA	3	465.25	0.00644815	0.103071
repeat 1 (6/16/2020)	7	UN	32	361.942	0.0884119	1.41323	7	OKA	7	564.583	0.0123985	0.198186	7	TTX	63	569.839	0.110558	1.76723	7	TTX/OKA	3	438.555	0.00684065	0.109345
repeat 1 (6/16/2020)	8	UN	11	395.413	0.027819	0.444677	8	OKA	17	673.603	0.0252374	0.403411	8	TTX	42	339.893	0.123568	1.9752
repeat 1 (6/16/2020)	9	UN	15	636.278	0.0235746	0.376832	9	OKA	31	414.25	0.074834	1.1962
repeat 1 (6/16/2020)	10	UN	22	572.243	0.0384452	0.614533	10	OKA	5	367.133	0.0136191	0.217696
repeat 2 (6/17/2020)	11	UN	23	319.666	0.07195	0.623112	11	OKA	9	531.76	0.0169249	0.146576	9	TTX	29	238.222	0.121735	1.05427	8	TTX/OKA	6	238.773	0.0251285	0.217621
repeat 2 (6/17/2020)	12	UN	69	442.099	0.156074	1.35165	12	OKA	2	545.973	0.00366318	0.0317244	10	TTX	46	379.445	0.12123	1.04989	9	TTX/OKA	16	318.23	0.0502781	0.435426
repeat 2 (6/17/2020)	13	UN	36	298.102	0.120764	1.04586	13	OKA	15	467.119	0.0321117	0.278099	11	TTX	66	422.347	0.15627	1.35335	10	TTX/OKA	10	294.797	0.0339216	0.293773
repeat 2 (6/17/2020)	14	UN	40	349.64	0.114403	0.990772	14	OKA	5	342.464	0.0146001	0.126442	12	TTX	92	398.137	0.231076	2.0012	11	TTX/OKA	6	420.142	0.0142809	0.123678
repeat 2 (6/17/2020)	15	UN	76	358.961	0.211722	1.83359	15	OKA	13	440.579	0.0295066	0.255537	13	TTX	170	666.128	0.255206	2.21017	12	TTX/OKA	6	392.473	0.0152877	0.132397
repeat 2 (6/17/2020)	16	UN	33	565.12	0.0583947	0.505718	16	OKA	21	430.013	0.0488357	0.422934	14	TTX	38	329.578	0.115299	0.998528	13	TTX/OKA	12	308.006	0.0389602	0.337409
repeat 2 (6/17/2020)	17	UN	24	426.117	0.0563226	0.487773	17	OKA	3	530.709	0.00565282	0.0489554	15	TTX	16	227.932	0.0701964	0.607925	14	TTX/OKA	6	196.064	0.0306023	0.265027
repeat 2 (6/17/2020)	18	UN	37	275.873	0.13412	1.16152	18	OKA	4	451.71	0.00885523	0.0766894	16	TTX	46	532.915	0.0863177	0.747541
repeat 2 (6/17/2020)							19	OKA	4	530.245	0.00754368	0.0653309	17	TTX	72	353.934	0.203428	1.76176
repeat 2 (6/17/2020)													18	TTX	36	345.915	0.104072	0.901298
repeat 2 (6/17/2020)													19	TTX	49	350.66	0.139736	1.21017
repeat 2 (6/17/2020)													20	TTX	100	642.329	0.155684	1.34827
repeat 2 (6/17/2020)													21	TTX	69	409.281	0.168588	1.46004
repeat 2 (6/17/2020)													22	TTX	74	633.632	0.116787	1.01142
repeat 3 (6/22/2020)	19	UN	41	464.349	0.0882956	0.585234	20	OKA	9	250.825	0.0358816	0.237827	23	TTX	94	479.613	0.569697	3.77602	15	TTX/OKA	19	335.05	0.140741	0.932846
repeat 3 (6/22/2020)	20	UN	46	288.688	0.159341	1.05613	21	OKA	39	409.463	0.0952466	0.631306	24	TTX	112	566.423	0.54902	3.63897	16	TTX/OKA	9	346.151	0.1125	0.745663
repeat 3 (6/22/2020)	21	UN	96	596.393	0.160968	1.06691	22	OKA	34	466.025	0.0729574	0.48357	25	TTX	58	377.449	0.471545	3.12545
repeat 3 (6/22/2020)	22	UN	67	520.919	0.128619	0.852501
repeat 3 (6/22/2020)	23	UN	88	377.097	0.233362	1.54675
repeat 3 (6/22/2020)	24	UN	71	527.296	0.134649	0.892471
repeat 4 (7/1/2020)	25	UN	60	545.975	0.109895	0.468738	23	OKA	28	494.996	0.0565661	0.241273	26	TTX	37	267.685	0.138222	0.589561	17	TTX/OKA	26	266.055	0.0977241	0.416825
repeat 4 (7/1/2020)	26	UN	68	241.203	0.28192	1.20248	24	OKA	16	385.879	0.0414637	0.176856	27	TTX	108	392.773	0.274968	1.17283	18	TTX/OKA	29	476.129	0.0609078	0.259791
repeat 4 (7/1/2020)	27	UN	148	959.94	0.154176	0.657611	25	OKA	7	229.283	0.03053	0.13022	28	TTX	115	206.365	0.557266	2.37692	19	TTX/OKA	38	431.684	0.0880273	0.375465
repeat 4 (7/1/2020)	28	UN	134	314.604	0.425932	1.81674	26	OKA	28	429.955	0.0651231	0.277771	29	TTX	62	310.49	0.199684	0.851716	20	TTX/OKA	50	370.444	0.134973	0.575704
repeat 4 (7/1/2020)	29	UN	226	494.996	0.456569	1.94741	27	OKA	20	163.23	0.122527	0.522615	30	TTX	58	478.105	0.121312	0.517435	21	TTX/OKA	26	275.973	0.0942122	0.401845
repeat 4 (7/1/2020)	30	UN	36	420.843	0.0855426	0.364867	28	OKA	17	477.693	0.0355877	0.151793							22	TTX/OKA	33	452.109	0.0729913	0.311331
repeat 4 (7/1/2020)	31	UN	82	645.13	0.127106	0.542149	29	OKA	10	188.064	0.0531732	0.226801							23	TTX/OKA	36	384.419	0.0936478	0.399438
repeat 4 (7/1/2020)																			24	TTX/OKA	29	283.832	0.102173	0.435801
repeat 4 (7/1/2020)																			25	TTX/OKA	36	331.501	0.108597	0.463201
repeat 4 (7/1/2020)																			26	TTX/OKA	17	304.951	0.0557466	0.237777
