# Supplementary material for: A bidirectional switch in the Shank3 phosphorylation state biases synapses toward up- or downscaling
Source: eLife. 2022 Apr 26;11:e74277. doi: 10.7554/eLife.74277 (PMC9084893; doi:10.7554/eLife.74277)
Supplement: Figure 5—source data 1. [file elife-74277-fig5-data1.xlsx]

## Sheet: Figure 5B
Experiment repeat	Cell	Condition	Raw intensity	Normalized intensity	Cell	Condition	Raw intensity	Normalized intensity	Cell	Condition	Raw intensity	Normalized intensity	Condition	Raw intensity	Normalized intensity
repeat 1 (7/9/2020)	1	UN	135752	0.849694	1	FST	131409	0.822513	1	TTX	224688	1.40636	1	TTX/FST	243029	1.52116
repeat 1 (7/9/2020)	2	UN	141637	0.886527	2	FST	223155	1.39676	2	TTX	350573	2.1943	2	TTX/FST	164986	1.03267
repeat 1 (7/9/2020)	3	UN	194008	1.21433	3	FST	138542	0.867158	3	TTX	200342	1.25398	3	TTX/FST	132245	0.827743
repeat 1 (7/9/2020)	4	UN	192839	1.20701	4	FST	198090	1.23988	4	TTX	241910	1.51416	4	TTX/FST	144335	0.90342
repeat 1 (7/9/2020)	5	UN	127814	0.800012	5	FST	111680	0.699025	5	TTX	156349	0.978618	5	TTX/FST	128400	0.803675
repeat 1 (7/9/2020)	6	UN	178576	1.11774	6	FST	160266	1.00313	6	TTX	240484	1.50523	6	TTX/FST	173150	1.08378
repeat 1 (7/9/2020)	7	UN	147734	0.924692	7	FST	148320	0.928359	7	TTX	261752	1.63835
repeat 1 (7/9/2020)					8	FST	118801	0.743596
repeat 2 (7/11/2020)	8	UN	206166	0.828102	9	FST	188203	0.755951	8	TTX	196054	0.787485	7	TTX/FST	441993	1.77534
repeat 2 (7/11/2020)	9	UN	258473	1.0382	10	FST	173040	0.695045	9	TTX	252957	1.01605	8	TTX/FST	420665	1.68968
repeat 2 (7/11/2020)	10	UN	403233	1.61966	11	FST	197988	0.795255	10	TTX	331596	1.33191	9	TTX/FST	230686	0.926592
repeat 2 (7/11/2020)	11	UN	242986	0.975994	12	FST	143959	0.578236	11	TTX	243896	0.979649	10	TTX/FST	250744	1.00716
repeat 2 (7/11/2020)	12	UN	202808	0.814613	13	FST	168106	0.675228	12	TTX	279863	1.12412	11	TTX/FST	256735	1.03122
repeat 2 (7/11/2020)	13	UN	180107	0.723432	14	FST	138603	0.556723					12	TTX/FST	287437	1.15454
repeat 2 (7/11/2020)													13	TTX/FST	214344	0.860948
repeat 2 (7/11/2020)													14	TTX/FST	224737	0.902695
repeat 3 (7/15/2020)	14	UN	138480	1.0097	15	FST	217096	1.58291	13	TTX	347152	2.53119	15	TTX/FST	217906	1.58882
repeat 3 (7/15/2020)	15	UN	128682	0.938256	16	FST	295392	2.15379	14	TTX	189790	1.38382	16	TTX/FST	241306	1.75944
repeat 3 (7/15/2020)	16	UN	148199	1.08057	17	FST	270948	1.97556	15	TTX	189756	1.38357	17	TTX/FST	138098	1.00691
repeat 3 (7/15/2020)	17	UN	149081	1.08699	18	FST	133100	0.970468	16	TTX	175702	1.2811	18	TTX/FST	193257	1.4091
repeat 3 (7/15/2020)	18	UN	110652	0.806797	19	FST	105882	0.772015	17	TTX	178890	1.30434	19	TTX/FST	193625	1.41178
repeat 3 (7/15/2020)	19	UN	152131	1.10923	20	FST	157768	1.15033	18	TTX	234966	1.71321	20	TTX/FST	140091	1.02144
repeat 3 (7/15/2020)	20	UN	132824	0.968461	21	FST	134199	0.978488	19	TTX	164613	1.20024	21	TTX/FST	200750	1.46373
repeat 3 (7/15/2020)					22	FST	115017	0.83862	20	TTX	302171	2.20322	22	TTX/FST	210925	1.53791
repeat 3 (7/15/2020)									21	TTX	319345	2.32844
repeat 4 (8/22/2020)	21	UN	218523	1.03185	23	FST	195728	0.924215	22	TTX	221811	1.04738	23	TTX/FST	235803	1.11344
repeat 4 (8/22/2020)	22	UN	190934	0.901578	24	FST	180774	0.8536	23	TTX	304583	1.43822	24	TTX/FST	200755	0.947951
repeat 4 (8/22/2020)	23	UN	225876	1.06657	25	FST	211797	1.00009	24	TTX	276162	1.30402	25	TTX/FST	138819	0.655493
repeat 4 (8/22/2020)									25	TTX	239252	1.12973
repeat 5 (8/24/2020)	24	UN	222631	1.31041	26	FST	208427	1.22681	26	TTX	193170	1.13701	26	TTX/FST	173630	1.02199
repeat 5 (8/24/2020)	25	UN	135778	0.79919	27	FST	202866	1.19408	27	TTX	218673	1.28711	27	TTX/FST	213553	1.25698
repeat 5 (8/24/2020)	26	UN	151274	0.890401	28	FST	177745	1.04621	28	TTX	236605	1.39266	28	TTX/FST	149653	0.880864
													29	TTX/FST	202193	1.19011

## Sheet: Figure 5C
Experiment repeat	Cell	Condition	Count	Length	Density	Normalized density	Cell	Condition	Count	Length	Density	Normalized density	Cell	Condition	Count	Length	Density	Normalized density	Cell	Condition	Count	Length	Density	Normalized density
repeat 1 (7/9/2020)	1	UN	70	664.371	0.105363	0.817825	1	FST	33	295.909	0.111521	0.865622	1	TTX	53	267.169	0.198376	1.53979	1	TTX/FST	72	407.919	0.176506	1.37004
repeat 1 (7/9/2020)	2	UN	53	348.302	0.152167	1.18112	2	FST	27	381.788	0.0707199	0.548927	2	TTX	50	554.546	0.0901639	0.699851	2	TTX/FST	54	539.317	0.100127	0.777181
repeat 1 (7/9/2020)	3	UN	45	472.01	0.0953369	0.740004	3	FST	66	536.403	0.123042	0.955048	3	TTX	89	590.241	0.150786	1.1704	3	TTX/FST	40	296.64	0.134844	1.04665
repeat 1 (7/9/2020)	4	UN	8	405.256	0.0197406	0.153226	4	FST	87	558.903	0.155662	1.20825	4	TTX	55	673.862	0.081619	0.633526	4	TTX/FST	52	324.033	0.160477	1.24562
repeat 1 (7/9/2020)	5	UN	108	614.337	0.175799	1.36455	5	FST	31	603.752	0.0513456	0.398544	5	TTX	96	585.676	0.163913	1.27229	5	TTX/FST	71	689.514	0.102971	0.799261
repeat 1 (7/9/2020)	6	UN	44	446.223	0.0986054	0.765374	6	FST	59	568.273	0.103823	0.805875	6	TTX	119	511.924	0.232456	1.80432	6	TTX/FST	48	427.602	0.112254	0.871312
repeat 1 (7/9/2020)	7	UN	95	372.814	0.254819	1.9779	7	FST	56	721.792	0.0775847	0.602211	7	TTX	66	417.262	0.158174	1.22774
repeat 1 (7/9/2020)							8	FST	40	313.564	0.127565	0.990161
repeat 2 (7/11/2020)	8	UN	81	581.773	0.139229	1.13436	9	FST	91	764.293	0.119064	0.970069	8	TTX	98	378.786	0.258721	2.10791	7	TTX/FST	71	597.462	0.118836	0.968208
repeat 2 (7/11/2020)	9	UN	48	546.678	0.0878031	0.71537	10	FST	59	582.652	0.101261	0.825018	9	TTX	68	609.309	0.111602	0.909269	8	TTX/FST	31	294.35	0.105317	0.858062
repeat 2 (7/11/2020)	10	UN	53	416.886	0.127133	1.03581	11	FST	86	480.161	0.179107	1.45926	10	TTX	104	384.426	0.270533	2.20415	9	TTX/FST	71	457.838	0.155077	1.26348
repeat 2 (7/11/2020)	11	UN	36	293.237	0.122768	1.00024	12	FST	38	440.869	0.0861933	0.702255	11	TTX	46	420.92	0.109284	0.890388	10	TTX/FST	52	467.959	0.111121	0.90535
repeat 2 (7/11/2020)	12	UN	44	325.214	0.135296	1.10231	13	FST	30	329.718	0.0909869	0.74131	12	TTX	134	788.791	0.16988	1.38409	11	TTX/FST	41	343.525	0.119351	0.972405
repeat 2 (7/11/2020)	13	UN	81	652.184	0.124198	1.0119	14	FST	61	451.233	0.135185	1.10141							12	TTX/FST	43	267.645	0.160661	1.30897
repeat 2 (7/11/2020)																			13	TTX/FST	64	458.106	0.139706	1.13824
repeat 2 (7/11/2020)																			14	TTX/FST	102	499.856	0.204059	1.66256
repeat 3 (7/15/2020)	14	UN	20	392.152	0.0510006	0.480354	15	FST	51	601.752	0.0847525	0.798249	13	TTX	48	403.942	0.118829	1.1192	15	TTX/FST	69	585.317	0.117885	1.11031
repeat 3 (7/15/2020)	15	UN	23	419.097	0.0548799	0.516891	16	FST	87	658.6	0.132098	1.24418	14	TTX	141	597.818	0.235858	2.22145	16	TTX/FST	88	407.72	0.215835	2.03286
repeat 3 (7/15/2020)	16	UN	59	450.798	0.130879	1.2327	17	FST	62	634.318	0.0977428	0.920599	15	TTX	128	264.586	0.483775	4.55647	17	TTX/FST	26	233.068	0.111555	1.05069
repeat 3 (7/15/2020)	17	UN	94	606.25	0.155052	1.46037	18	FST	80	530.447	0.150816	1.42048	16	TTX	38	311.717	0.121905	1.14818	18	TTX/FST	85	387.04	0.219616	2.06847
repeat 3 (7/15/2020)	18	UN	49	440.981	0.111116	1.04656	19	FST	17	444.472	0.0382476	0.360239	17	TTX	72	270.084	0.266584	2.51084	19	TTX/FST	71	440.912	0.16103	1.51667
repeat 3 (7/15/2020)	19	UN	38	412.792	0.0920561	0.867039	20	FST	28	374.134	0.0748396	0.704883	18	TTX	121	686.497	0.176257	1.66009	20	TTX/FST	61	405.899	0.150284	1.41546
repeat 3 (7/15/2020)	20	UN	85	573.453	0.148225	1.39607	21	FST	56	597.403	0.0937391	0.88289	19	TTX	188	580.003	0.324136	3.05291	21	TTX/FST	47	627.433	0.0749084	0.705531
repeat 3 (7/15/2020)							22	FST	14	292.651	0.0478386	0.450572	20	TTX	59	442.265	0.133404	1.25648	22	TTX/FST	48	381.821	0.125713	1.18404
repeat 3 (7/15/2020)													21	TTX	112	469.575	0.238513	2.24646
repeat 4 (8/22/2020)	21	UN	80	341.11	0.234528	1.34692	23	FST	104	382.781	0.271696	1.56038	22	TTX	111	384.641	0.288581	1.65735	23	TTX/FST	96	606.228	0.158356	0.909455
repeat 4 (8/22/2020)	22	UN	64	421.369	0.151886	0.872297	24	FST	84	463.756	0.18113	1.04025	23	TTX	60	536.773	0.111779	0.641959	24	TTX/FST	59	250.05	0.235953	1.3551
repeat 4 (8/22/2020)	23	UN	63	463.402	0.135951	0.78078	25	FST	35	677.238	0.0516805	0.296806	24	TTX	185	540.803	0.342084	1.96462	25	TTX/FST	38	612.282	0.0620629	0.356434
repeat 4 (8/22/2020)													25	TTX	71	391.175	0.181505	1.0424
repeat 5 (8/24/2020)	24	UN	43	318.565	0.13498	0.981909	26	FST	37	466.958	0.0792362	0.576402	26	TTX	115	496.557	0.231595	1.68473	26	TTX/FST	38	371.882	0.102183	0.743326
repeat 5 (8/24/2020)	25	UN	81	502.836	0.161086	1.17182	27	FST	29	282.322	0.102719	0.74723	27	TTX	125	413.562	0.302252	2.19872	27	TTX/FST	37	516.916	0.0715784	0.520695
repeat 5 (8/24/2020)	26	UN	65	558.738	0.116334	0.846265	28	FST	46	444.035	0.103596	0.753603	28	TTX	88	449.591	0.195733	1.42386	28	TTX/FST	78	689.616	0.113106	0.822789
repeat 5 (8/24/2020)																			29	TTX/FST	8	337.255	0.0237209	0.172557

## Sheet: Figure 5E
Experiment repeat	Cell	Condition	Raw intensity	Normalized intensity	Cell	Condition	Raw intensity	Normalized intensity	Cell	Condition	Raw intensity	Normalized intensity	Cell	Condition	Raw intensity	Normalized intensity
repeat 1 (7/9/2020)	1	UN	135752	0.849694	1	TAUT	219385	1.37317	1	TTX	224688	1.40636	1	TTX/TAUT	126687	0.792958
repeat 1 (7/9/2020)	2	UN	141637	0.886527	2	TAUT	100605	0.629704	2	TTX	350573	2.1943	2	TTX/TAUT	110491	0.691585
repeat 1 (7/9/2020)	3	UN	194008	1.21433	3	TAUT	105086	0.657751	3	TTX	200342	1.25398	3	TTX/TAUT	193368	1.21032
repeat 1 (7/9/2020)	4	UN	192839	1.20701	4	TAUT	82116.2	0.513979	4	TTX	241910	1.51416	4	TTX/TAUT	174665	1.09326
repeat 1 (7/9/2020)	5	UN	127814	0.800012	5	TAUT	122852	0.768951	5	TTX	156349	0.978618	5	TTX/TAUT	297890	1.86454
repeat 1 (7/9/2020)	6	UN	178576	1.11774	6	TAUT	124708	0.780571	6	TTX	240484	1.50523	6	TTX/TAUT	155567	0.973721
repeat 1 (7/9/2020)	7	UN	147734	0.924692	7	TAUT	97059.4	0.607511	7	TTX	261752	1.63835	7	TTX/TAUT	187444	1.17325
repeat 2 (7/11/2020)	8	UN	206166	0.828102	8	TAUT	146731	0.589369	8	TTX	196054	0.787485	8	TTX/TAUT	212756	0.854571
repeat 2 (7/11/2020)	9	UN	258473	1.0382	9	TAUT	175781	0.706055	9	TTX	252957	1.01605	9	TTX/TAUT	289967	1.1647
repeat 2 (7/11/2020)	10	UN	403233	1.61966	10	TAUT	157261	0.631665	10	TTX	331596	1.33191	10	TTX/TAUT	164674	0.661443
repeat 2 (7/11/2020)	11	UN	242986	0.975994	11	TAUT	180168	0.723676	11	TTX	243896	0.979649	11	TTX/TAUT	233156	0.93651
repeat 2 (7/11/2020)	12	UN	202808	0.814613					12	TTX	279863	1.12412	12	TTX/TAUT	243876	0.979572
repeat 2 (7/11/2020)	13	UN	180107	0.723432									13	TTX/TAUT	232337	0.933221
repeat 2 (7/11/2020)
repeat 2 (7/11/2020)
repeat 3 (7/15/2020)	14	UN	138480	1.0097	12	TAUT	99507.6	0.72554	13	TTX	347152	2.53119	14	TTX/TAUT	241735	1.76257
repeat 3 (7/15/2020)	15	UN	128682	0.938256	13	TAUT	102692	0.748761	14	TTX	189790	1.38382	15	TTX/TAUT	204459	1.49077
repeat 3 (7/15/2020)	16	UN	148199	1.08057	14	TAUT	116804	0.851656	15	TTX	189756	1.38357	16	TTX/TAUT	210844	1.53732
repeat 3 (7/15/2020)	17	UN	149081	1.08699	15	TAUT	122123	0.890434	16	TTX	175702	1.2811	17	TTX/TAUT	145000	1.05724
repeat 3 (7/15/2020)	18	UN	110652	0.806797	16	TAUT	108767	0.793056	17	TTX	178890	1.30434	18	TTX/TAUT	172416	1.25714
repeat 3 (7/15/2020)	19	UN	152131	1.10923					18	TTX	234966	1.71321	19	TTX/TAUT	153528	1.11942
repeat 3 (7/15/2020)	20	UN	132824	0.968461					19	TTX	164613	1.20024	20	TTX/TAUT	154185	1.12421
repeat 3 (7/15/2020)									20	TTX	302171	2.20322	21	TTX/TAUT	155496	1.13377
repeat 3 (7/15/2020)									21	TTX	319345	2.32844	22	TTX/TAUT	221162	1.61255
repeat 3 (7/15/2020)													23	TTX/TAUT	363233	2.64844
repeat 4 (8/22/2020)	21	UN	218523	1.03185	17	TAUT	174480	0.823883	22	TTX	221811	1.04738	24	TTX/TAUT	206433	0.974761
repeat 4 (8/22/2020)	22	UN	190934	0.901578	18	TAUT	225554	1.06505	23	TTX	304583	1.43822	25	TTX/TAUT	154322	0.728695
repeat 4 (8/22/2020)	23	UN	225876	1.06657	19	TAUT	140353	0.662736	24	TTX	276162	1.30402	26	TTX/TAUT	180142	0.850618
repeat 4 (8/22/2020)									25	TTX	239252	1.12973	27	TTX/TAUT	152645	0.720779
													28	TTX/TAUT	226678	1.07035
repeat 5 (8/24/2020)	24	UN	222631	1.31041	20	TAUT	166330	0.979019	26	TTX	193170	1.13701	29	TTX/TAUT	141185	0.831018
repeat 5 (8/24/2020)	25	UN	135778	0.79919	21	TAUT	151463	0.891513	27	TTX	218673	1.28711	30	TTX/TAUT	193662	1.1399
repeat 5 (8/24/2020)	26	UN	151274	0.890401					28	TTX	236605	1.39266	31	TTX/TAUT	237482	1.39782
													32	TTX/TAUT	185192	1.09005

## Sheet: Figure 5F
Experiment repeat	Cell	Condition	Count	Length	Density	Normalized density	Cell	Condition	Count	Length	Density	Normalized density	Cell	Condition	Count	Length	Density	Normalized density	Cell	Condition	Count	Length	Density	Normalized density
repeat 1 (7/9/2020)	1	UN	70	664.371	0.105363	0.817825	1	TAUT	31	476.057	0.0651183	0.505447	1	TTX	53	267.169	0.198376	1.53979	1	TTX/TAUT	54	547.746	0.0985859	0.765223
repeat 1 (7/9/2020)	2	UN	53	348.302	0.152167	1.18112	2	TAUT	21	590.363	0.0355713	0.276104	2	TTX	50	554.546	0.0901639	0.699851	2	TTX/TAUT	68	758.026	0.0897067	0.696302
repeat 1 (7/9/2020)	3	UN	45	472.01	0.0953369	0.740004	3	TAUT	21	263.4	0.0797265	0.618836	3	TTX	89	590.241	0.150786	1.1704	3	TTX/TAUT	64	617.699	0.10361	0.804222
repeat 1 (7/9/2020)	4	UN	8	405.256	0.0197406	0.153226	4	TAUT	17	567.075	0.0299784	0.232692	4	TTX	55	673.862	0.081619	0.633526	4	TTX/TAUT	67	559.123	0.119831	0.930123
repeat 1 (7/9/2020)	5	UN	108	614.337	0.175799	1.36455	5	TAUT	40	281.639	0.142026	1.1024	5	TTX	96	585.676	0.163913	1.27229	5	TTX/TAUT	42	505.991	0.0830055	0.644287
repeat 1 (7/9/2020)	6	UN	44	446.223	0.0986054	0.765374	6	TAUT	20	354.068	0.0564864	0.438447	6	TTX	119	511.924	0.232456	1.80432	6	TTX/TAUT	36	522.521	0.0688968	0.534776
repeat 1 (7/9/2020)	7	UN	95	372.814	0.254819	1.9779	7	TAUT	18	313.445	0.0574263	0.445742	7	TTX	66	417.262	0.158174	1.22774	7	TTX/TAUT	35	321.326	0.108924	0.845465
repeat 2 (7/11/2020)	8	UN	81	581.773	0.139229	1.13436	8	TAUT	76	507.953	0.14962	1.21902	8	TTX	98	378.786	0.258721	2.10791	8	TTX/TAUT	41	403.947	0.101498	0.826952
repeat 2 (7/11/2020)	9	UN	48	546.678	0.0878031	0.71537	9	TAUT	24	799.509	0.0300184	0.244573	9	TTX	68	609.309	0.111602	0.909269	9	TTX/TAUT	73	737.293	0.0990108	0.806684
repeat 2 (7/11/2020)	10	UN	53	416.886	0.127133	1.03581	10	TAUT	59	318.192	0.185422	1.51072	10	TTX	104	384.426	0.270533	2.20415	10	TTX/TAUT	41	446.636	0.0917974	0.747914
repeat 2 (7/11/2020)	11	UN	36	293.237	0.122768	1.00024	11	TAUT	53	559.717	0.0946908	0.771487	11	TTX	46	420.92	0.109284	0.890388	11	TTX/TAUT	43	487.8	0.0881508	0.718203
repeat 2 (7/11/2020)	12	UN	44	325.214	0.135296	1.10231							12	TTX	134	788.791	0.16988	1.38409	12	TTX/TAUT	74	460.49	0.160699	1.30928
repeat 2 (7/11/2020)	13	UN	81	652.184	0.124198	1.0119													13	TTX/TAUT	46	596.443	0.0771239	0.628362
repeat 2 (7/11/2020)
repeat 2 (7/11/2020)
repeat 3 (7/15/2020)	14	UN	20	392.152	0.0510006	0.480354	12	TAUT	13	307.573	0.0422664	0.39809	13	TTX	48	403.942	0.118829	1.1192	14	TTX/TAUT	74	652.19	0.113464	1.06867
repeat 3 (7/15/2020)	15	UN	23	419.097	0.0548799	0.516891	13	TAUT	19	286.034	0.0664257	0.625636	14	TTX	141	597.818	0.235858	2.22145	15	TTX/TAUT	63	383.776	0.164158	1.54614
repeat 3 (7/15/2020)	16	UN	59	450.798	0.130879	1.2327	14	TAUT	100	950.291	0.105231	0.991127	15	TTX	128	264.586	0.483775	4.55647	16	TTX/TAUT	47	448.411	0.104815	0.987206
repeat 3 (7/15/2020)	17	UN	94	606.25	0.155052	1.46037	15	TAUT	21	250.473	0.0838413	0.789667	16	TTX	38	311.717	0.121905	1.14818	17	TTX/TAUT	53	493.275	0.107445	1.01198
repeat 3 (7/15/2020)	18	UN	49	440.981	0.111116	1.04656	16	TAUT	56	663.956	0.084343	0.794392	17	TTX	72	270.084	0.266584	2.51084	18	TTX/TAUT	75	468.369	0.16013	1.5082
repeat 3 (7/15/2020)	19	UN	38	412.792	0.0920561	0.867039							18	TTX	121	686.497	0.176257	1.66009	19	TTX/TAUT	112	644.67	0.173732	1.63631
repeat 3 (7/15/2020)	20	UN	85	573.453	0.148225	1.39607							19	TTX	188	580.003	0.324136	3.05291	20	TTX/TAUT	30	308.517	0.0972395	0.915859
repeat 3 (7/15/2020)													20	TTX	59	442.265	0.133404	1.25648	21	TTX/TAUT	64	534.462	0.119747	1.12784
																			22	TTX/TAUT	52	346.459	0.15009	1.41364
repeat 3 (7/15/2020)													21	TTX	112	469.575	0.238513	2.24646	23	TTX/TAUT	32	364.905	0.0876941	0.825955
repeat 4 (8/22/2020)	21	UN	80	341.11	0.234528	1.34692	17	TAUT	26	293.652	0.0885402	0.508495	22	TTX	111	384.641	0.288581	1.65735	24	TTX/TAUT	47	291.266	0.161365	0.926734
repeat 4 (8/22/2020)	22	UN	64	421.369	0.151886	0.872297	18	TAUT	70	496.443	0.141003	0.809794	23	TTX	60	536.773	0.111779	0.641959	25	TTX/TAUT	78	462.492	0.168652	0.968583
repeat 4 (8/22/2020)	23	UN	63	463.402	0.135951	0.78078	19	TAUT	94	297.356	0.31612	1.81551	24	TTX	185	540.803	0.342084	1.96462	26	TTX/TAUT	56	328.724	0.170356	0.97837
													25	TTX	71	391.175	0.181505	1.0424	27	TTX/TAUT	57	271.687	0.2098	1.2049
repeat 4 (8/22/2020)																			28	TTX/TAUT	77	232.217	0.331587	1.90434
repeat 5 (8/24/2020)	24	UN	43	318.565	0.13498	0.981909	20	TAUT	146	741.545	0.196886	1.43224	26	TTX	115	496.557	0.231595	1.68473	29	TTX/TAUT	45	559.667	0.0804049	0.584903
repeat 5 (8/24/2020)	25	UN	81	502.836	0.161086	1.17182	21	TAUT	32	288.45	0.110938	0.807014	27	TTX	125	413.562	0.302252	2.19872	30	TTX/TAUT	82	728.004	0.112637	0.819373
repeat 5 (8/24/2020)	26	UN	65	558.738	0.116334	0.846265							28	TTX	88	449.591	0.195733	1.42386	31	TTX/TAUT	42	425.503	0.0987067	0.718039
repeat 5 (8/24/2020)																			32	TTX/TAUT	36	422.17	0.0852736	0.620321
