# Supplementary material for: A bidirectional switch in the Shank3 phosphorylation state biases synapses toward up- or downscaling
Source: eLife. 2022 Apr 26;11:e74277. doi: 10.7554/eLife.74277 (PMC9084893; doi:10.7554/eLife.74277)
Supplement: Figure 6—figure supplement 1—source data 1. [file elife-74277-fig6-figsupp1-data1.xlsx]

## Sheet: Figure S6-1A
Cond	pAmps	Genotype	Cellid
1	14.6959	Control	1
1	16.167	Control	2
1	18.3182	Control	3
1	18.9511	Control	4
1	18.9378	Control	5
1	14.2386	Control	6
1	15.4784	Control	7
1	15.6045	Control	8
1	13.5285	Control	9
1	13.5309	Control	10
1	9.95743	Control	11
1	16.2723	Control	12
1	13.9188	Control	13
1	17.8565	Control	14
1	14.7235	Control	15
1	14.6679	Control	16
1	17.0009	Control	17
1	10.2588	Control	18
1	19.1069	Control	19
2	14.0809	PTX	20
2	12.8489	PTX	21
2	11.8695	PTX	22
2	14.3528	PTX	23
2	14.4588	PTX	24
2	15.3036	PTX	25
2	11.8313	PTX	26
2	11.5386	PTX	27
2	14.6071	PTX	28
2	19.7086	PTX	29
2	15.6844	PTX	30
2	9.78749	PTX	31
2	13.1013	PTX	32
2	14.5513	PTX	33
2	11.1581	PTX	34
2	14.0051	PTX	35
2	16.0237	PTX	36
2	12.6628	PTX	37
2	13.9597	PTX	38
3	12.7981	KD	39
3	20.0294	KD	40
3	25.9015	KD	41
3	11.0838	KD	42
3	15.1279	KD	43
3	18.3855	KD	44
3	11.6266	KD	45
3	14.846	KD	46
3	15.9395	KD	47
3	15.2878	KD	48
3	12.3208	KD	49
3	14.3485	KD	50
3	13.0599	KD	51
3	9.49957	KD	52
3	21.9581	KD	53
3	14.8621	KD	54
3	21.8305	KD	55
3	10.9915	KD	56
4	14.3998	KD PTX	57
4	14.5475	KD PTX	58
4	13.183	KD PTX	59
4	28.0738	KD PTX	60
4	14.6845	KD PTX	61
4	12.3457	KD PTX	62
4	19.5818	KD PTX	63
4	19.2988	KD PTX	64
4	11.8473	KD PTX	65
4	11.2522	KD PTX	66
4	13.6895	KD PTX	67
4	17.2192	KD PTX	68
4	12.4253	KD PTX	69
4	15.5201	KD PTX	70
4	9.19812	KD PTX	71
4	15.8092	KD PTX	72

## Sheet: Figure S6-1B
pAmps
Control	PTX	KD PTX
7.36666	24.9216	14.5232
12.5197	29.9949	8.19933
6.74236	19.6936	11.8463
10.905	13.6807	13.1079
12.7333	20.7053	15.1278
10.7037	15.8436	15.2065
21.4699	10.4024	13.9156
18.12	9.37152	9.15699
20.4504	6.6416	12.9365
14.0709	11.2151	12.5523
13.1869	17.0065	12.1028
25.1233	16.0951	9.33411
14.525	22.6912	8.71619
6.20617	8.00732	12.3772
25.3109	11.1792	9.62479
9.26003	20.1005	9.49903
13.8043	15.8727	10.6129
34.2925	28.0949	9.78699
17.2005	6.94209	19.3609
10.8461	9.07254	10.4347
15.2411	10.2096	9.54521
17.136	12.7649	17.2342
10.5556	12.6336	9.13623
13.2916	8.65748	16.9706
10.1208	13.5891	7.10608
6.6023	8.64052	18.9579
16.2745	11.4933	11.9199
33.9657	20.7145	11.29
15.8708	18.9162	12.1484
12.1039	11.0647	19.6271
8.95999	19.0539	17.6275
10.8524	14.8997	5.85277
10.3506	9.59337	16.8069
15.5196	13.1523	15.2161
13.5646	6.93535	5.89461
26.0946	10.9121	10.3714
8.71197	15.3752	11.8396
11.8732	10.6101	8.10369
9.94164	17.4465	8.02932
30.8539	12.8599	16.9099
7.11884	7.73852	12.7979
12.0691	12.1006	10.124
14.9031	9.15295	5.70866
14.6753	12.3541	16.8994
15.7914	13.4398	11.2708
14.0613	12.6048	8.75959
11.4999	12.4233	13.8491
12.4772	9.66955	8.90542
10.781	7.99435	13.178
15.9835	10.7909	20.4464
15.9563	13.7577	8.14193
12.5533	15.0893	11.1831
10.5541	8.80903	10.4847
18.7001	10.7403	11.4733
16.6047	21.4025	8.75044
14.5499	15.2207	8.03968
13.0314	18.3016	13.8403
8.75	7.56855	13.723
20.3575	8.35251	17.1177
12.6166	10.5469	8.15283
14.1476	12.5865	7.99121
14.9004	12.6635	17.447
11.3286	11.4766	21.7876
21.6087	7.3468	15.6807
22.6888	7.22177	20.0811
16.2601	12.9504	7.17531
26.1935	9.7421	25.1016
25.9889	9.56039	21.3679
21.2998	12.6991	16.6528
19.0279	13.5786	13.7845
18.9672	11.2229	14.9241
26.454	8.08885	14.345
44.3404	10.2317	19.2175
15.5536	13.363	11.5024
9.07889	15.0859	8.96114
10.7287	11.0211	39.5127
7.36197	8.16396	21.8124
17.7188	27.6389	28.3143
12.9345	24.5893	24.1892
23.5369	8.0522	36.9573
5.33212	9.22292	37.2984
12.8321	29.1559	15.8302
25.9899	17.8729	39.0133
18.9675	17.1327	13.7067
9.7718	9.09632	18.1585
34.8217	12.303	23.79
12.0677	10.176	32.1276
29.2045	8.83856	23.1175
11.673	12.9138	17.6795
13.0261	14.7528	19.0512
9.60305	18.2651	15.2564
14.5229	15.4446	17.4837
46.7473	13.4692	23.1992
8.35627	13.982	17.3076
26.0549	13.1975	22.1522
20.9089	10.1782	30.0983
12.0141	10.0162	86.374
8.99838	9.13029	29.6953
20.6119	7.27585	9.08292
15.066	11.387	10.0941
10.6002	15.3173	7.14385
15.3211	10.8245	6.53501
13.8146	9.30768	18.2562
12.0356	9.95924	5.79782
38.9733	11.0181	23.3548
28.2718	14.1084	7.73073
21.0096	8.23486	7.66288
20.1702	21.7844	8.19537
11.0694	19.6495	10.5995
7.42799	13.3655	8.25603
7.10789	12.4473	16.4136
20.2214	11.9254	12.655
27.7293	9.31946	20.9227
10.7864	13.3429	11.4537
23.2037	22.3053	13.1044
7.79966	32.6727	19.9458
13.6168	21.107	19.2918
17.1391	15.4035	25.4908
32.3106	16.3328	7.61447
17.0997	6.45649	7.50365
17.5398	15.9193	11.9342
52.4706	8.37233	8.13722
22.953	10.7424	11.9897
15.7331	10.2933	16.1043
16.4234	7.86567	8.48377
29.2112	12.3506	11.8293
12.7253	9.44298	10.2941
11.2762	11.1915	14.8659
11.8727	15.2068	13.3227
27.5639	13.648	17.1792
12.1337	8.12073	13.0314
24.7739	15.9962	29.51
15.1152	9.85156	23.2756
11.1838	15.6694	7.09577
7.31305	19.5873	11.9263
10.452	14.5429	8.45281
30.1185	11.273	10.0752
7.79333	9.66233	9.77289
18.1777	16.5387	15.0985
11.8053	16.38	15.8485
12.9628	7.13851	13.358
8.38336	9.00632	9.27673
11.4507	17.8068	14.51
11.6391	25.1222	11.7605
27.7386	13.2906	13.134
22.5893	30.3656	10.7929
15.6492	15.5216	10.3699
16.5961	16.5015	9.57944
9.66504	18.9365	9.83569
18.9816	16.0711	12.4028
27.7305	6.77292	13.0466
10.7874	14.1202	8.23727
12.4467	25.2516	35.9808
12.037	6.28857	26.6138
24.7945	17.8986	13.346
12.569	20.9077	33.0225
21.289	10.5828	17.4498
13.7017	7.08996	20.1189
18.2199	7.1948	11.8193
27.8055	8.07577	10.0912
25.6154	7.44044	8.0999
11.9878	11.2382	11.5979
12.4814	8.88869	34.3124
10.4804	9.90356	23.5776
8.48415	10.0571	7.17056
17.3381	17.9115	29.0914
16.6673	19.2362	20.4488
8.96697	15.4345	23.4306
9.36114	9.61018	20.0177
6.29116	26.7686	19.6617
7.95268	8.80536	9.57612
23.7488	7.16757	32.0699
15.2468	9.42347	13.8791
23.5874	8.0008	22.9692
12.1008	7.46077	11.0616
17.6921	5.82941	46.6052
8.24687	7.36553	9.81139
9.2181	5.90025	15.8507
10.4498	9.03349	20.346
19.8421	15.197	58.8251
13.7247	10.9394	9.77343
20.3908	7.33701	16.8069
24.7362	8.33146	7.14397
8.30109	10.3447	31.6951
9.41168	8.99358	13.4201
29.0137	11.5805	34.5162
18.8713	27.0818	11.042
19.04	9.60517	23.8041
9.35098	9.24335	18.3147
10.8851	8.99632	23.5092
23.4421	8.77312	10.3202
15.2067	20.3256	19.1749
9.84109	11.1953	6.64967
13.5402	10.0455	23.964
15.9098	8.9221	24.6933
10.5991	6.80252	27.0825
14.5834	11.8055	11.0548
11.7947	14.5641	18.6814
14.9509	9.73806	24.1477
22.2304	12.2971	15.4795
9.22358	6.87723	12.891
13.9848	6.08942	7.18296
27.5289	10.1641	11.8951
6.81007	7.58507	10.6918
12.1385	13.0094	9.65207
12.4008	21.9307	6.88711
10.3307	14.3161	9.21098
6.5239	8.18973	10.8321
6.5819	10.559	19.4694
6.68858	7.1502	8.10843
22.5069	8.3741	12.5516
20.6339	21.1696	19.0823
23.5493	21.2001	8.67892
11.9319	22.8872	8.53652
7.44408	17.4975	8.89349
9.61236	13.0288	5.67989
8.32049	52.7511	10.4069
8.40704	10.6426	6.6869
14.7531	10.1894	5.70924
16.9341	7.67395	11.6958
15.0456	11.3113	15.6743
7.89232	13.3822	20.2476
13.8624	8.80556	11.1497
14.3176	14.8227	12.2736
13.3244	13.352	13.4377
8.80735	26.2267	5.95099
12.4067	7.17076	15.9462
10.2244	33.5492	9.01659
12.0939	15.2957	8.33563
14.0777	7.22088	14.2273
15.2635	13.6443	9.46573
13.2503	9.053	6.25877
9.27625	32.6861	10.3238
8.72709	8.84564	14.0391
9.42637	7.75786	20.148
15.6615	15.3439	9.7056
10.5918	8.70842	7.82807
17.3661	10.0247	6.7053
16.3216	12.1494	10.0831
18.3651	12.4291	19.2634
16.9798	9.33271	9.74424
9.0126	19.4273	12.289
16.8535	25.3615	10.2877
19.4002	6.14841	13.0425
8.41183	45.9642	12.3681
9.28664	12.6423	9.94003
7.81127	15.8492	7.57313
16.7056	15.103	19.2757
11.5559	18.8162	6.6835
10.2274	27.4051	8.79081
8.38182	7.01429	8.16411
15.8563	8.71834	14.5478
13.3905	12.9844	8.71357
8.3823	6.24349	18.8806
8.79827	8.54235	11.1485
5.71753	7.00063	7.7396
8.29181	12.9187	17.4932
11.2887	8.52757	6.1385
10.9822	8.91528	24.5997
15.1655	13.5295	9.5803
7.74322	13.2156	8.43855
7.65518	7.45205	14.3749
7.77131	11.5299	7.13279
12.5358	8.69682	10.8626
10.491	7.25797	21.3775
8.82378	13.2617	21.5378
9.89958	8.23318	9.97115
6.64939	7.70599	15.3064
7.20793	10.7058	30.8095
18.9438	8.65923	11.4144
8.62454	9.83131	13.8868
12.0124	7.03886	6.75784
9.31766	8.98823	10.4088
10.5964	10.914	7.22004
6.34586	12.7629	14.8919
8.79656	28.9225	20.4859
22.6783	15.0451	8.31186
13.6055	20.5096	10.2013
7.44348	8.4617	6.63254
16.5572	26.8596	20.5984
15.1657	16.0607	7.1921
13.0969	13.4356	23.3356
14.0523	13.9752	19.6777
9.03929	11.498	17.3398
19.0838	11.1107	12.3687
13.3971	15.8643	9.15064
14.5243	10.1362	11.9326
11.5051	12.2749	13.7758
23.7896	16.591	13.6778
15.7184	12.3822	14.6222
10.6738	9.15385	15.8589
20.6054	30.6393	28.7415
13.293	10.6399	14.026
12.7533	9.50405	14.1065
22.3047	23.3009	10.04
13.4399	9.22307	10.9278
23.533	20.479	27.9664
18.058	9.55298	21.8071
22.107	13.088	15.6975
15.0244	12.8316	16.3254
8.10454	8.7739	8.16833
11.8518	23.0439	5.76334
19.4572	17.3914	25.2921
7.25707	7.47092	9.26014
8.31602	7.16396	15.102
10.6658	6.51246	12.8466
26.0416	12.2516	8.23323
13.9276	8.22579	14.4306
11.4761	16.3734	7.8933
11.0903	19.834	7.71949
8.71353	11.0669	12.6046
19.3174	6.78179	20.1581
12.2176	12.524	6.33859
6.37864	28.4777	13.4562
14.1905	19.2421	7.29844
12.3371	20.623	19.9383
8.43658	11.8267	7.3021
23.9021	10.8521	7.61309
20.4715	6.82216	9.76538
28.0286	13.2898	19.0594
8.72117	9.88833	21.3539
17.5865	20.6031	14.1085
8.21531	8.46908	8.5
9.63018	16.1935	6.79419
21.6356	19.6011	16.9698
17.0098	7.6589	26.6797
27.0898	23.8877	16.0935
16.268	25.8356	13.5313
9.90919	8.13003	32.1717
17.8756	7.72709	10.1736
12.8794	7.93984	13.2167
23.2337	9.36692	13.2129
38.7148	11.4628	12.0984
30.0606	19.2743	14.4179
13.2786	20.9137	15.754
18.8757	32.4979	11.7776
12.8916	20.3034	9.29923
11.3955	7.28997	20.1101
15.5193	6.4827	21.24
12.7244	6.98998	20.9131
8.74601	16.2503	19.0593
12.6451	8.63206	15.6285
8.61693	7.64363	8.10069
13.4891	11.6786	20.7095
21.1104	8.15714	14.0106
17.1258	19.7266	11.9038
10.7177	5.49914	12.8709
37.3295	10.952	28.1676
13.2222	9.12133	18.1218
21.8739	21.5787	14.5212
7.07352	13.8504	7.6141
10.5645	24.4209	5.31771
9.39574	5.58727	10.3041
10.8116	7.58454	7.67723
7.56413	9.26287	8.02842
11.004	7.56428	6.23657
8.75913	8.86929	10.7683
11.5467	11.7945	10.7546
9.42494	7.52628	9.12469
10.9165	10.2816	9.72861
12.2494	11.6694	7.3741
9.9264	12.9586	9.30674
11.9797	10.1992	9.86821
12.5092	9.92842	8.38624
13.038	10.0014	8.43584
10.2838	31.4045	13.9785
10.1073	17.8927	16.2435
15.6252	9.34562	11.0785
9.00795	7.94179	5.99162
21.556	14.319	6.45541
14.7127	12.2459	10.9658
35.4802	16.3927	12.4598
10.2601	10.1038	6.85931
23.5214	8.88414	5.74663
7.42159	9.74396	11.2485
9.69565	15.2306
8.33276	5.78716
8.50137	7.92134
7.42716	8.96208
19.0328	9.68208
14.4957	7.95075
12.6636	17.6118
10.8721	10.0942
26.3811	18.7824
18.3545	14.8407
32.295	22.954
18.4642	13.623
5.79687	14.9456
8.24366	12.9917
11.5082	22.7091
9.08586	10.3238
16.5917	7.22387
26.7108	15.4223
11.4825	10.5672
25.1426	9.91146
36.4339	11.5552
10.4179	15.6329
14.2787	15.2024
11.466	14.961
11.2525	12.6073
9.44004	9.80243
11.5151	7.26568
11.6889	44.6671
23.1491	9.84549
16.6359	22.0157
9.83063	13.6806
14.6037	21.7729
18.3588	8.31374
19.2849	19.0338
16.3102	18.9947
11.0949	14.7532
8.6974	20.0596
44.3373	11.8677
11.4506	15.4634
11.5402	10.5636
20.0554	13.4205
15.2724	17.5691
12.0667	11.8947
10.0176	9.80733
9.96713	22.9133
22.9556	14.2134
23.6035	9.00197
12.6403	29.501
34.3421	23.5619
20.0755	9.87976
6.43536	19.3535
6.65905	8.62555
12.7333	11.5802
8.62407	13.5742
9.91463	12.9831
8.98196	9.50958
19.6949	7.76314
10.4701	13.6313
18.2985	20.9463
7.36213	8.09113
8.71989	8.50499
5.97955	11.1843
10.9774	10.33
10.0779	9.55712
7.86853	8.44627
6.87047	25.1988
7.45546	18.1769
11.6455	10.4196
7.32306	7.33128
6.62514	10.8495
12.0404	32.4471
8.13089	16.1939
9.48209	11.6038
9.79293	8.06639
17.5434	11.1595
14.8152	13.2261
23.7682	10.5173
13.1478	10.6848
13.1666	20.0878
59.572	23.3251
16.6284	10.9767
45.0932	35.9415
13.966	12.2072
22.1785	14.7236
34.5889	8.29982
34.886	12.4912
12.8282	7.20775
10.2915	8.07516
21.8628	13.1972
18.764	13.1732
35.3225	16.4788
10.7663	8.84321
21.9135	9.92994
10.0949	8.96209
11.6918	12.4595
28.7594	8.21409
7.35944	14.784
7.75568	16.3353
12.1171	14.734
21.172	12.7024
