# Supplementary material for: A bidirectional switch in the Shank3 phosphorylation state biases synapses toward up- or downscaling
Source: eLife. 2022 Apr 26;11:e74277. doi: 10.7554/eLife.74277 (PMC9084893; doi:10.7554/eLife.74277)
Supplement: Figure 6—figure supplement 2—source data 1. [file elife-74277-fig6-figsupp2-data1.xlsx]

## Sheet: Figure S6-2B
Experiment repeat	Cell	Condition	Raw intensity	Normalized intensity	Cell	Condition	Raw intensity	Normalized intensity	Cell	Condition	Raw intensity	Normalized intensity	Cell	Condition	Raw intensity	Normalized intensity
repeat 1	1	WT	86579.6	1.0795	1	WT TTX	115523	1.44037	1	AA	72731.8	0.906839	1	AA TTX	63089.9	0.786621
repeat 1	2	WT	81045.6	1.0105	2	WT TTX	144882	1.80642	2	AA	81185.7	1.01224	2	AA TTX	123467	1.53941
repeat 1	3	WT	51674.5	0.64429	3	WT TTX	80207.6	1.00005	3	AA	89862.1	1.12042	3	AA TTX	94710.5	1.18087
repeat 1	4	WT	105741	1.31841	4	WT TTX	262828	3.277	4	AA	82878	1.03334	4	AA TTX	88895.4	1.10837
repeat 1	5	WT	85989.2	1.07214	5	WT TTX	115444	1.43939	5	AA	39972.7	0.498389	5	AA TTX	123655	1.54177
repeat 1	6	WT	74614	0.930306	6	WT TTX	91739.7	1.14383	6	AA	87160.4	1.08674	6	AA TTX	133185	1.66058
repeat 1	7	WT	79613.3	0.992638	7	WT TTX	79226.1	0.987811	7	AA	78564.8	0.979565	7	AA TTX	83108.9	1.03622
repeat 1	8	WT	75803.5	0.945137	8	WT TTX	129235	1.61133	8	AA	76984.5	0.959862	8	AA TTX	101469	1.26514
repeat 1	9	WT	66513.6	0.829308	9	WT TTX	166176	2.07193	9	AA	76925.5	0.959126	9	AA TTX	105594	1.31657
repeat 1	10	WT	74972	0.93477	10	WT TTX	87137.2	1.08645	10	AA	83054.7	1.03555	10	AA TTX	116399	1.45129
repeat 1	11	WT	85121.1	1.06131	11	WT TTX	90790.3	1.132	11	AA	92516.4	1.15352	11	AA TTX	97037.8	1.20989
repeat 1	12	WT	85587.7	1.06713	12	WT TTX	102349	1.27611	12	AA	98150.8	1.22377	12	AA TTX	110467	1.37733
repeat 1	13	WT	89392.8	1.11457	13	WT TTX	92986	1.15937	13	AA	68410.6	0.85296
repeat 1					14	WT TTX	84940.9	1.05906
repeat 1					15	WT TTX	142935	1.78215
repeat 2	14	WT	64642.7	0.930937	16	WT TTX	72220.3	1.04006	14	AA	80725.2	1.16255	13	AA TTX	146080	2.10373
repeat 2	15	WT	51915.9	0.747654	17	WT TTX	77676	1.11863	15	AA	55834.2	0.804083	14	AA TTX	103264	1.48713
repeat 2	16	WT	77860.3	1.12129	18	WT TTX	140914	2.02933	16	AA	72200	1.03977	15	AA TTX	56745.8	0.81721
repeat 2	17	WT	67333.1	0.969681	19	WT TTX	82249	1.18449	17	AA	72961.3	1.05073
repeat 2	18	WT	85866.8	1.23659	20	WT TTX	69644.7	1.00297	18	AA	79723.8	1.14812
repeat 2	19	WT	69011.4	0.993851					19	AA	84145.8	1.2118
repeat 2									20	AA	53522.9	0.770797
repeat 2									21	AA	43045	0.619902
repeat 2									22	AA	137155	1.97521
repeat 3	20	WT	88319.5	0.930252	21	WT TTX	113045	1.19068	23	AA	92643.2	0.975793	16	AA TTX	131120	1.38106
repeat 3	21	WT	115953	1.22131	22	WT TTX	161010	1.69589	24	AA	61351.3	0.646201	17	AA TTX	101979	1.07412
repeat 3	22	WT	120897	1.27339	23	WT TTX	209929	2.21115					18	AA TTX	143807	1.51469
repeat 3	23	WT	54595.7	0.575047	24	WT TTX	93964.8	0.989713					19	AA TTX	114347	1.2044
repeat 3													20	AA TTX	89604.7	0.943789
repeat 4	24	WT	90604.8	1.23249	25	WT TTX	198375	2.69849	25	AA	110453	1.50249	21	AA TTX	81653.6	1.11073
repeat 4	25	WT	69131.4	0.940392	26	WT TTX	66981.1	0.911142	26	AA	53547.3	0.728402	22	AA TTX	68671.4	0.934135
repeat 4	26	WT	48808	0.663934	27	WT TTX	89405.8	1.21618	27	AA	73997.7	1.00659	23	AA TTX	88243	1.20037
repeat 4	27	WT	42072.2	0.572306	28	WT TTX	57788.2	0.786092	28	AA	64754.9	0.880858	24	AA TTX	120563	1.64001
repeat 4	28	WT	116950	1.59087	29	WT TTX	60132.4	0.817978	29	AA	85655.2	1.16516	25	AA TTX	70081.7	0.953319
repeat 4					30	WT TTX	80427.6	1.09405	30	AA	50640	0.688854	26	AA TTX	66061.6	0.898633
repeat 4									31	AA	80011.8	1.0884	27	AA TTX	42024	0.571651
repeat 4									32	AA	73084.6	0.994167	28	AA TTX	95166.1	1.29454
repeat 4									33	AA	64014.4	0.870785
repeat 4									34	AA	47456.7	0.645552
repeat 4
repeat 4

## Sheet: Figure S6-2C
Experiment repeat	Cell	Condition	Raw intensity	Normalized intensity	Cell	Condition	Raw intensity	Normalized intensity	Cell	Condition	Raw intensity	Normalized intensity	Cell	Condition	Raw intensity	Normalized intensity
repeat 1					1	WT BIC	40201	0.513455	1	DD	74507.3	0.951622	1	DD BIC	55353.4	0.706985
repeat 1	1	WT	43987.4	0.561816									2	DD BIC	76333	0.97494
repeat 1	2	WT	53921.3	0.688694	2	WT BIC	84932.9	1.08478	2	DD	89779.6	1.14668	3	DD BIC	51707.6	0.66042
repeat 1	3	WT	79549.7	1.01602					3	DD	61557.3	0.786222
repeat 1	4	WT	117929	1.50621	3	WT BIC	49264	0.62921	4	DD	92138.3	1.17681	4	DD BIC	81228	1.03746
repeat 1	5	WT	91755.5	1.17192	4	WT BIC	64564	0.824624	5	DD	71779	0.916776	5	DD BIC	74553.1	0.952207
repeat 1	6	WT	75048.4	0.958533					6	DD	77416.4	0.988778	6	DD BIC	49873.2	0.636991
repeat 1	7	WT	70686.7	0.902825	5	WT BIC	87379.7	1.11603	7	DD	75640.9	0.966101
repeat 1	8	WT	76100.1	0.971966	6	WT BIC	61749.7	0.788679
repeat 1	9	WT	95677.3	1.22201	7	WT BIC	61274.3	0.782608
repeat 1					8	WT BIC	100014	1.2774
repeat 2									8	DD	140130	1.92643	7	DD BIC	73100.9	1.00495
repeat 2	10	WT	77226.7	1.06167					9	DD	73874.4	1.01558	8	DD BIC	87540.5	1.20345
repeat 2	11	WT	60180.6	0.827327	9	WT BIC	75523.8	1.03826	10	DD	69243.2	0.951913
repeat 2	12	WT	120294	1.65373	10	WT BIC	67871.6	0.933057	11	DD	80680.9	1.10915
repeat 2	13	WT	81129.1	1.11531	11	WT BIC	57113.8	0.785167	12	DD	62630.1	0.861	9	DD BIC	101745	1.39873
repeat 2	14	WT	60562.8	0.83258	12	WT BIC	51190.7	0.703739	13	DD	85529.5	1.17581	10	DD BIC	62116.7	0.853943
repeat 2	15	WT	62335.4	0.85695	13	WT BIC	96059	1.32056	14	DD	82254.6	1.13079	11	DD BIC	86805.3	1.19335
repeat 2	16	WT	46593	0.640532	14	WT BIC	68438.8	0.940856					12	DD BIC	62855.8	0.864104
repeat 2	17	WT	73665.2	1.0127	15	WT BIC	52968.8	0.728182					13	DD BIC	64250.3	0.883274
repeat 2	18	WT	65713.9	0.903395	16	WT BIC	69145.7	0.950573					14	DD BIC	80848.6	1.11146
repeat 2					17	WT BIC	48281.4	0.663744
repeat 2	19	WT	74452.2	1.02352	18	WT BIC	62293.5	0.856374
repeat 2	20	WT	75329.4	1.03558	19	WT BIC	52765.4	0.725387
repeat 2	21	WT	53003.8	0.728664
repeat 2	22	WT	95147.4	1.30803	20	WT BIC	59863.2	0.822964
repeat 2					21	WT BIC	66275.6	0.911117
repeat 2					22	WT BIC	48810.9	0.671022
repeat 2					23	WT BIC	50763.4	0.697864
repeat 3	23	WT	52061.9	0.652179	24	WT BIC	42940.9	0.53792	15	DD	69207.6	0.866963	15	DD BIC	46385.8	0.581074
repeat 3	24	WT	61955.8	0.77612	25	WT BIC	66713.7	0.835722	16	DD	57453.2	0.719715	16	DD BIC	71966.7	0.901525
repeat 3					26	WT BIC	48942	0.613096	17	DD	71810.1	0.899564
repeat 3	25	WT	99502.8	1.24647	27	WT BIC	57726.8	0.723143					17	DD BIC	47118.5	0.590252
repeat 3	26	WT	78505.6	0.983438	28	WT BIC	69516.1	0.870828	18	DD	73420.3	0.919736
repeat 3	27	WT	107112	1.34179					19	DD	63565.3	0.796281
repeat 3					29	WT BIC	71794.1	0.899363	20	DD	64916.5	0.813208	18	DD BIC	70168.2	0.878996
repeat 3
repeat 3					30	WT BIC	49418.8	0.619068					19	DD BIC	64624.3	0.809547
repeat 3					31	WT BIC	41938.2	0.525359
repeat 4	28	WT	130311	1.38305	32	WT BIC	88912.7	0.943665	21	DD		0.597958	20	DD BIC	70005.2	0.742993
repeat 4	29	WT	117157	1.24343	33	WT BIC	125590	1.33293	22	DD		1.12277	21	DD BIC	65661.9	0.696896
repeat 4	30	WT	75186.7	0.797986	34	WT BIC	81819	0.868377	23	DD		0.877555	22	DD BIC	76047.6	0.807124
repeat 4	31	WT	159800	1.69602	35	WT BIC	53148.8	0.564089	24	DD		0.940301	23	DD BIC	78149.6	0.829432
repeat 4	32	WT	90102.7	0.956295	36	WT BIC	72597.4	0.770505	25	DD		0.730726	24	DD BIC	63338	0.672231
repeat 4	33	WT	71391.2	0.757703	37	WT BIC	85262.2	0.904921	26	DD		0.776169	25	DD BIC	63356.8	0.67243
repeat 4	34	WT	79975	0.848806	38	WT BIC	68275	0.724629	27	DD		0.707449	26	DD BIC	65988.3	0.700359
repeat 4	35	WT	75314.8	0.799345					28	DD		0.977705	27	DD BIC	62287.4	0.661081
repeat 4	36	WT	53241.5	0.565073	39	WT BIC	110850	1.17649	29	DD		0.873316	28	DD BIC	82422.2	0.874779
repeat 4	37	WT	60228.8	0.639232	40	WT BIC	67256.7	0.713822					29	DD BIC	67522.4	0.716642
repeat 4	38	WT	141906	1.50611	41	WT BIC	95012.5	1.00841					30	DD BIC	70550.1	0.748776
repeat 4	39	WT	84368.1	0.895432	42	WT BIC	206543	2.19212
repeat 4	40	WT	81689	0.866998	43	WT BIC	84034.1	0.891887
repeat 4	41	WT	98416.3	1.04453	44	WT BIC	82258	0.873037
repeat 4					45	WT BIC	138493	1.46988
