# Supplementary material for: A bidirectional switch in the Shank3 phosphorylation state biases synapses toward up- or downscaling
Source: eLife. 2022 Apr 26;11:e74277. doi: 10.7554/eLife.74277 (PMC9084893; doi:10.7554/eLife.74277)
Supplement: Figure 6—source data 1. [file elife-74277-fig6-data1.xlsx]

## Sheet: Figure 6C
					mEPSC (pA)
		file	M_strtX	M_pkX	M_pkY	M_base	M_rise	M_endX	M_decay	M_HW	M_HR	M_area		Ih	Vm	Ra	Rin	Cm	Tau	Freq
WT	02 04 2019	Cell_01_0010	10488.2	10490.2	-10.8159	-17.1509	0.652814	10499	0	2.87607	10489.6	-42.6914		-18726540000000	-62.2835	17.7212	421.302	100911770000000	1.76242	0.272222
WT	02 13 2019	Cell_02_0007	8670.05	8672.41	-16.9321	-21.6139	0.782629	8685.27	0	4.04233	8671.56	-92.0564		-20637130000000	-65.8501	13.9972	200.745	152698430000000	1.98386	0.361111
WT	02 15 2019	Cell_01_0002	11106	11107.6	-9.63852	-1.19142	0.708649	11115.3	0	2.89961	11107	-35.7845		1430883000000	-70.7085	13.4736	515.178	138974300000000	1.8747	0.155
WT	02 15 2019	Cell_02_0007	10957.6	10960.2	-19.2807	-9.98867	1.00295	10973.3	0	4.71779	10959	-114.294		-19692690000000	-63.882	13.9753	336.217	166596000000000	2.28257	0.5125
WT	2 15 2019	Cell_03_0008	10387.9	10389.7	-15.531	13.2584	0.541503	10399	0	2.78245	10389.1	-57.1465		12911283200000	-72.3825	11.2342	190.188	452471300000000	5.05845	0.615
WT	2 15 2019	Cell_04_0005	10321.1	10323.1	-12.8613	-17.547	0.704202	10332.1	0	3.35344	10322.3	-53.2064		-19122480000000	-64.4632	15.5449	292.014	152928000000000	2.36123	0.7
WT	02 19 2019	Cell_01_0007	10483.7	10486	-9.81419	-6.98437	0.816576	10494.7	0	3.32423	10485.1	-40.3653		-7278529000000	-64.2673	16.2257	794.875	117355380000000	1.89125	0.144444
WT	02 22 2019	Cell_01_0006	10323.5	10325.9	-10.9665	-11.7527	1.04926	10336.5	0	4.15854	10324.8	-55.3528		-13094276000000	-66.197	15.6179	298.029	150897400000000	2.36306	1.39286
		file	M_strtX	M_pkX	M_pkY	M_base	M_rise	M_endX	M_decay	M_HW	M_HR	M_area		Ih	Vm	Ra	Rin	Cm	Tau	Freq
WT TTX	02 04 2019	Cell_03_0005	10235.1	10237.2	-16.9871	-26.1469	0.622711	10247.6	0	3.01551	10236.6	-69.9527		-26792630000000	-59.7038	9.57694	384.544	883140370000000	1.06354	0.775
WT TTX	2 04 2019	Cell_04_0005	10291.5	10293.5	-13.0293	-9.42911	0.688981	10304.3	0	3.3565	10292.8	-58.9897		-9.41714e+12	-64.5491	17.0101	579.161	9.67571e+13	1.63562	0.34
WT TTX	2 04 2019	Cell_05_0009	10438.6	10440.9	-16.7641	-19.0043	0.674302	10451.8	0	3.42708	10440.1	-73.4559		-18724160000000	-56.4276	13.6341	725.681	100246300000000	1.36664	1.04
WT TTX	02 13 2019	Cell_03_0010	9761.92	9764.26	-18.6817	-8.08368	0.773497	9776.44	0	3.93372	9763.38	-93.5831		-8973985000000	-67.0347	14.84	325.533	352255700000000	4.66401	1.2375
WT TTX	2 15 2019	Cell_05_0003	10252.2	10254.3	-19.7225	-31.7661	0.618992	10264.7	0	3.25633	10253.6	-84.8956		-24787520000000	-62.1373	12.6768	328.373	181043190000000	2.27925	2.03333
WT TTX	02 18 2019	Cell_01_0005	9129.55	9131.63	-18.5947	-22.7991	0.554864	9141.17	0	2.72768	9131.11	-68.8361		-2.20999e+13	-60.3115	16.5415	441.939	5.53492e+14	9.08403	1.21667
WT TTX	02 19 2019	Cell_02_0005	10811.1	10813.6	-17.8095	-14.0699	0.811301	10825.6	0	4.20103	10812.6	-95.6603		-14687700000000	-60.4884	19.3689	658.217	88609975000000	1.70168	1.4875
WT TTX	2 22 2019	Cell_07_0006	10557.9	10559.9	-22.1526	-52.496	0.636259	10572	0	3.54252	10559.2	-102.434		-5.32966e+13	-56.9805	12.7965	247.286	1.23913e+14	1.46203	1.21667
WT TTX	2 22 2019	Cell_09_0003	10305	10306.8	-27.7638	-56.9437	0.586134	10320.2	0	3.19549	10306.2	-124.493		-56891600000000	-57.4241	14.2261	221.567	140618800000000	1.96987	1.73333

## Sheet: Figure 6D
					mEPSC (pA)
		file	M_strtX	M_pkX	M_pkY	M_base	M_rise	M_endX	M_decay	M_HW	M_HR	M_area		Ih	Vm	Ra	Rin	Cm	Tau	Freq
DD	2 04 2019	Cell_06_0003	9807.9	9809.88	-16.4267	-18.1229	0.580763	9818.54	0	2.76385	9809.29	-58.5585		-19263780000000	-63.5959	10.3937	336.363	1.82647e+16	5.51122	0.305556
DD	2 13 2019	Cell_04_0007	9592.41	9595.33	-13.2408	-4.18858	1.05326	9606.44	0	4.52718	9594.13	-72.8562		-2711827500000	-69.3947	17.7219	222.229	173640750000000	3.02399	0.5125
DD	2 13 2019	Cell_05_0003	9726.8	9729.19	-13.0202	-23.1903	0.894539	9739.02	0	3.88102	9728.21	-62.6209		-11629063270000	-67.9644	10.1746	204.637	163855750000000	1.34101	1.35
DD	2 15 2019	Cell_06_0010	11412.3	11414.2	-12.2414	-10.2374	0.634344	11423.6	0	2.90753	11413.6	-48.9391		-10703395000000	-62.4791	15.4183	709.47	220468400000000	3.36807	0.23
DD	2 15 2019	Cell_08_0004	9711.36	9713.04	-15.5002	-37.9449	0.589032	9720.98	0	2.70242	9712.44	-57.8244		-33441230000000	-64.4075	14.1516	167.943	174551300000000	2.45515	1.4125
DD	02 18 2019	Cell_03_0009	11034.2	11036.2	-11.8467	-48.4852	0.619884	11043.1	0	2.80548	11035.6	-39.411		-48886250000000	-57.5724	15.1443	255.366	121106780000000	1.82405	0.27
DD	2 19 2019	Cell_07_0009	10100.9	10103	-14.5729	-21.6688	0.665861	10113.8	0	3.33804	10102.3	-69.3087		-2.26849e+13	-61.7129	14.2984	354.057	2.45083e+14	3.47324	0.472222
DD	03 05 2019	Cell_02_0010	9309.98	9311.76	-10.4601	-35.8922	0.725917	9322.56	0	3.39216	9310.94	-48.9269		-37361620000000	-62.5088	16.9666	202.598	135134200000000	2.28577	0.275
DD	03 06 2019	Cell_01_0006	10204.6	10206.8	-18.8269	-25.3426	0.559437	10215.6	0	2.77721	10206.2	-66.8167		-25418060000000	-61.3049	10.9566	342.239	159916100000000	1.72552	1.22778
DD	03 09 2019	Cell_01_0003	10729	10731.1	-16.9672	-17.1292	0.66927	10741	0	3.33565	10730.3	-70.8896		-18256925000000	-66.7771	16.847	178.098	140155625000000	2.33301	0.76875
DD	03 13 2019	Cell_01_0010	9780.58	9782.19	-16.1522	-12.0392	0.480195	9791.33	0	2.26191	9781.75	-50.4888		-11954670000000	-56.5556	13.9392	1124.21	309304950000000	4.30906	0.77
DD	03 20 2019	Cell_01_0009	10104.1	10105.9	-16.5801	-12.4919	0.528686	10117.9	0	3.19783	10105.3	-73.1986		-12659770000000	-62.0846	17.92	623.752	195792790000000	3.58768	0.195
		file	M_strtX	M_pkX	M_pkY	M_base	M_rise	M_endX	M_decay	M_HW	M_HR	M_area		Ih	Vm	Ra	Rin	Cm	Tau	Freq
DD TTX	2 04 2019	Cell_07_0012	9766.78	9768.97	-17.0171	-23.2654	0.665807	9779.54	0	3.19111	9768.28	-72.0688		-2.32592e+13	-57.2706	16.9719	547.33	1.20459e+14	2.0067	0.644444
DD TTX	2 13 2019	Cell_06_0011	10238.9	10241.1	-13.4765	-6.38021	0.60805	10250	0	2.85454	10240.5	-50.6929		-6009243000000	-65.1271	16.3735	810.138	173682700000000	2.8363	0.122727
DD TTX	2 13 2019	Cell_07_0008	10073.8	10076.1	-14.5807	-12.4818	0.823364	10087.4	0	4.0642	10075.2	-74.3871		-12616305000000	-65.7891	16.0846	346.238	181106875000000	2.79853	1.24
DD TTX	2 15 2019	Cell_09_0001	10408.6	10410.4	-22.1065	-15.2218	0.515233	10420.2	0	2.57585	10409.9	-77.947		-14636325000000	-59.9434	10.7866	685.502	2.39766e+26	2290840000000	4.7
DD TTX	2 15 2019	Cell_10_0004	10266.2	10268.1	-14.1332	-18.785	0.638983	10277.2	0	2.88271	10267.4	-52.3563		-1.33871e+13	-66.4438	17.5419	265.759	1.1176e+14	1.94977	1.0125
DD TTX	02 18 2019	Cell_04_0010	9295.96	9298.23	-15.7846	-40.8668	0.561453	9306.8	0	2.67658	9297.68	-58.7354		-3.94127e+13	-62.0474	16.1706	209.998	1.25206e+14	2.04533	0.183333
DD TTX	02 19 2019	Cell_05_0017	9770.89	9773.47	-13.9908	-23.3594	0.890658	9784.08	0	3.81858	9772.45	-68.8172		-23477620000000	-56.0256	17.8079	594.849	133258300000000	2.37185	0.0852941
DD TTX	02 19 2019	Cell_06_0004	9888.66	9891	-16.2589	-61.8406	0.819017	9903.81	0	4.18086	9890.1	-89.8427		-64712375000000	-57.7553	14.8209	192.34	162143500000000	2.40041	1.3
DD TTX	02 22 2019	Cell_03_0008	10328.1	10330.3	-11.1963	-12.1946	0.63636	10338	0	2.68621	10329.6	-38.566		-10829550000000	-60.7215	14.0008	870.677	9.02556e+13	1.22609	0.2375
DD TTX	02 22 2019	Cell_04_0010	10394	10396.1	-15.1213	-19.4885	0.638807	10406.2	0	3.27256	10395.3	-64.1189		-20088290000000	-55.9497	18.6506	720.458	112859100000000	2.10247	1.125
DD TTX	2 22 2019	Cell_06_0003	11595.6	11598.2	-15.0601	-25.0089	0.846279	11610.7	0	4.4269	11597.1	-85.586		-2.89271e+13	-56.0101	11.6739	483.695	118757000000000	1.9899	1.6
DD TTX	03 09 2018	Cell_02_0008	7548.66	7550.61	-12.7287	-11.6119	0.569823	7558.17	0	2.71236	7550.05	-43.2187		-10056051000000	-60.2414	14.5376	977.019	102943890000000	1.47601	0.183333
DD TTX	03 20 2019	Cell_03_0006	10406.6	10408.9	-14.7167	-37.792	0.709277	10418.9	0	3.404	10408.1	-63.5268		-37943070000000	-62.9369	17.7067	186.224	130662440000000	2.25116	1.45833
DD TTX	03 26 2019	Cell_02_0011	9346.75	9348.59	-16.9476	-9.0361	0.550037	9355.5	0	2.26815	9348.12	-48.71		-7900728000000	-63.6417	16.0403	801.775	185289190000000	3.09041	0.65

## Sheet: Figure 6G
					mEPSC (pA)
		file	M_strtX	M_pkX	M_pkY	M_base	M_rise	M_endX	M_decay	M_HW	M_HR	M_area		Ih	Vm	Ra	Rin	Cm	Tau	Freq
WT	2018-11-28	Cell_01_0010	4035.23	4038.15	-14.0129	-53.2887	1.07244	4050.58	0	5.212	4036.93	-85.8882		-6.25422e+13	-59.063	16.9439	175.352	2.06551e+14	3.47923	0.425
WT	2019-12-12	Cell_02_0013	9457.76	9460.44	-13.4586	-16.5343	0.897146	9472.26	0	3.99216	9459.38	-73.3398		-1.64743e+13	-63.926	16.3823	364.302	1.06815e+14	1.74761	0.516667
WT	2019-12-12	Cell_03_0002	10754.4	10756.5	-14.4223	-20.8922	0.698356	10765	0	3.06522	10755.8	-56.132		-16310650000000	-61.175	10.5931	547.667	171233300000000	1.78394	3.625
WT	01 27 2019	Cell_01_0005	10972.7	10975.2	-25.0118	-34.8631	0.767172	10990.2	0	4.44294	10974.2	-145.715		-36244000000000	-62.1864	15.8645	217.44	120857100000000	1.8798	0.866667
WT	01 27 2019	Cell_02_0003	10457.3	10459.2	-18.1006	-20.7764	0.540344	10467.3	0	2.52182	10458.7	-57.4127		-22539500000000	-62.3123	16.3748	342.919	4.69067e+14	7.66269	3.06667
WT	1 27 2019	Cell_03_0010	11368.4	11370.4	-13.7865	-24.6452	0.605309	11377.7	0	2.59322	11369.8	-45.7089		-25428590000000	-58.4053	15.0453	455.706	149188500000000	2.24924	0.765
WT	01 29 2019	Cell_02_0008	10661.1	10663.7	-13.2737	-15.8164	0.793695	10674.1	0	3.8986	10662.8	-62.9706		-1.62903e+13	-65.0597	16.822	303.844	1.23613e+14	2.04376	0.678571
WT	01 31 2019	Cell_02_0004	10146.6	10148.9	-14.035	-23.2509	0.735082	10160.2	0	3.84616	10148.1	-67.2997		-25126250000000	-59.3	16.5243	428.317	87409400000000	1.4444	1.85
		file	M_strtX	M_pkX	M_pkY	M_base	M_rise	M_endX	M_decay	M_HW	M_HR	M_area		Ih	Vm	Ra	Rin	Cm	Tau	Freq
WT BIC	2019-11-28	Cell_06_0009	9455.78	9458.2	-9.82591	-31.299	1.07593	9468.03	0	3.90189	9457.2	-48.1618		-3.11672e+13	-61.9849	16.8405	259.449	1.10581e+14	1.86013	0.1875
WT BIC	2019-11-28	Cell_07_0010	9355.43	9357.54	-9.4297	-38.6473	0.832788	9366.14	0	3.1612	9356.65	-38.6407		-3.92987e+13	-60.9371	17.62	230.56	1.32589e+14	2.31307	0.311111
WT BIC	2019-11-28	Cell_04_0008	8725.56	8727.8	-12.7388	-18.4236	0.729545	8736.17	0	3.10051	8727.05	-48.821		-1.83927e+13	-59.0907	18.3867	593.48	2.11649e+14	3.88327	0.31
WT BIC	2018-01-24	Cell_03_0009	9502.1	9504.25	-10.9092	-19.3228	0.842109	9511.53	0	2.62172	9503.47	-38.1435		-14090060000000	-66.9775	12.853	214.195	199682800000000	2.56992	0.23
WT BIC	2018-01-24	Cell_04_0007	11129.9	11131.9	-11.4882	-6.22616	0.596796	11139.6	0	2.74487	11131.2	-37.9963		-8563782000000	-67.311	17.4512	311.239	102036120000000	1.75847	0.87
WT BIC	01 29 2019	Cell_04_0003	11176.1	11178.6	-13.8954	-63.127	0.742518	11188.3	0	3.42913	11177.7	-58.9109		-7.12597e+13	-54.8406	14.7096	212.897	4.06952e+13	0.595957	6
WT BIC	01 31 2019	Cell_03_0007	11210.6	11212.8	-16.3636	-33.4205	0.657023	11226	0	3.75241	11212.1	-80.4312		-3.29497e+13	-65.3784	16.9704	140.238	2.47638e+14	2.93309	0.733333
WT BIC	1 31 2019	Cell_04_0008	7425.05	7427.48	-11.0372	-10.7563	0.733574	7436.98	0	3.02335	7426.72	-45.8732		-1.05409e+13	-60.8945	15.6483	870.473	1.506e+14	2.29507	0.125

## Sheet: Figure 6H
					mEPSC (pA)
		file	M_strtX	M_pkX	M_pkY	M_base	M_rise	M_endX	M_decay	M_HW	M_HR	M_area		Ih	Vm	Ra	Rin	Cm	Tau	Freq
AA	2019-11-28	Cell_03_0004	10173.3	10175.5	-16.9307	-14.0667	0.7359	10186.2	0	3.60544	10174.7	-77.4209		-11242320000000	-66.8862	15.6445	281.514	120779160000000	1.88895	2.0875
AA	2019-11-28	Cell_04_0008	9906.26	9908.56	-13.921	-29.1874	0.714536	9919.53	0	3.55061	9907.8	-63.4744		-29300500000000	-63.5107	17.946	221.608	186400000000000	3.37406	1.14167
AA	2019-11-28	Cell_05_0010	9489.22	9491.18	-9.54247	-23.5731	0.628138	9499.63	0	2.84026	9490.58	-35.6372		-24009170000000	-61.0234	17.2318	375.364	132306200000000	2.26504	0.365
AA	2019-12-12	Cell_06_0008	10067.7	10069.5	-11.6849	-41.0659	0.660986	10077.6	0	2.81821	10068.9	-42.1108		-4.15562e+13	-57.9948	17.9746	289.245	1.91564e+14	3.43554	0.485714
AA	2018-01-24	Cell_06_0010	10444.2	10446.1	-18.9242	-1.47957	0.594689	10457.1	0	3.13301	10445.4	-80.2469		-2533871020000	-69.4892	15.2949	250.238	309440500000000	4.70699	0.54
AA	2018-01-24	Cell_07_0008	9905.1	9907.42	-19.7698	-14.8279	0.696968	9917.75	0	3.4966	9906.64	-87.2031		-1.77789e+13	-66.4471	12.4851	202.485	243038000000000	3.03409	0.9
AA	1 27 2019	Cell_05_0010	11358.5	11360.5	-12.2348	-23.2243	0.639887	11369.6	0	2.90559	11359.8	-49.7439		-24640910000000	-60.1766	14.6016	406.753	176841100000000	2.56511	0.33
AA	1 27 2019	Cell_06_0007	10243.7	10246	-14.7389	-40.633	0.794791	10257.6	0	3.85912	10245.2	-75.0112		-44552160000000	-65.0152	15.5464	113.241	141089000000000	2.18445	0.415
AA	1 29 2019	Cell_06_0008	10127.8	10130	-10.978	-16.9577	0.789658	10138.1	0	3.07027	10129.2	-39.9413		-17851275000000	-61.005	20.4153	501.605	127440000000000	2.59915	0.4
		file	M_strtX	M_pkX	M_pkY	M_base	M_rise	M_endX	M_decay	M_HW	M_HR	M_area		Ih	Vm	Ra	Rin	Cm	Tau	Freq
AA BIC	2019-11-28	Cell_08_0005	9750.17	9752.36	-15.4542	-28.9861	0.562984	9762.24	0	2.99579	9751.75	-62.4862		-29233300000000	-64.0135	15.9315	204.663	330197600000000	5.25172	0.88
AA BIC	2019-11-28	Cell_10_0004	8582.12	8584.54	-11.685	-37.7723	0.717503	8591.8	0	3.02356	8583.83	-41.7847		-39089400000000	-62.1409	18.4401	201.412	115874375000000	2.13211	0.425
AA BIC	2019-11-28	Cell_09_0007	10904.7	10907	-10.2456	-26.4757	0.774766	10915.9	0	3.60244	10906.1	-43.8594		-26815360000000	-63.5444	18.6886	241.88	149666200000000	2.79843	0.74
AA BIC	2019-12-12	Cell_07_0010	9840.52	9843.1	-15.6555	-71.8432	0.919022	9854.6	0	4.2279	9842.03	-86.7996		-80293760000000	-60.0528	5.30669	123.957	287909400000000	1.45582	0.75
AA BIC	2019-12-12	Cell_08_0010	10230.1	10231.9	-17.6868	-25.6357	0.62208	10242	0	3.09523	10231.2	-73.3625		-26298050000000	-57.3527	15.2692	480.863	305273300000000	4.59001	0.425
AA BIC	2019-12-12	Cell_09_0002	9565.32	9567.39	-19.3459	-35.3771	0.61507	9577.57	0	2.97667	9566.79	-74.9385		-30468030000000	-58.2865	17.8023	386.964	115057630000000	2.04743	2.525
AA BIC	2018-01-24	Cell_08_0010	11699.1	11701.7	-13.0089	-29.9592	0.725168	11711.5	0	3.72615	11700.8	-58.6891		-2.98226e+13	-62.6632	16.8567	245.857	1.07324e+14	1.78631	0.438889
AA BIC	2018-01-24	Cell_09_0010	10615.2	10617.2	-17.474	-37.9831	0.571182	10625.6	0	2.74036	10616.6	-65.7232		-38001690000000	-60.8125	12.439	241.558	573775200000000	6.55265	1.025
AA BIC	1 27 2019	Cell_07_0009	11542.1	11544.5	-12.1667	-24.9366	0.896849	11553.5	0	3.67668	11543.5	-55.6899		-2.48067e+13	-61.4673	18.6904	345.091	1.33625e+14	2.4967	0.211111
AA BIC	1 27 2019	Cell_08_0010	10349	10351.2	-12.366	-37.0303	0.663227	10359.9	0	3.14576	10350.5	-48.0819		-3.68079e+13	-58.6363	14.6295	308.578	1.32032e+14	1.93631	0.19375
AA BIC	1 29 2019	Cell_05_0003	10854.3	10856.2	-18.1709	-18.6069	0.660662	10865.7	0	3.12681	10855.4	-72.9284		-15025975000000	-63.5459	12.5672	427.703	130521737500000	1.60812	1.53333
AA BIC	1 31 2019	Cell_05_0004	9660.2	9662.31	-16.3968	-33.0374	0.700542	9673.39	0	3.77363	9661.41	-76.4603		-30924300000000	-59.5487	19.7612	341.903	89526525000000	1.76935	0.516667
AA BIC	1 31 2019	Cell_06_0009	10217.1	10219.4	-12.1904	-25.5605	0.769159	10228.9	0	3.45482	10218.6	-50.5025		-26497110000000	-59.5542	16.1433	393.834	131359100000000	2.10331	0.211111
AA BIC	1 31 2019	Cell_07_0005	10238.5	10240.7	-11.7887	-21.6695	0.70703	10249.3	0	3.27738	10239.9	-46.9156		-22730300000000	-60.7702	16.512	409.322	92700762500000	1.53066	0.5875
