# Supplementary material for: A bidirectional switch in the Shank3 phosphorylation state biases synapses toward up- or downscaling
Source: eLife. 2022 Apr 26;11:e74277. doi: 10.7554/eLife.74277 (PMC9084893; doi:10.7554/eLife.74277)
Supplement: Figure 7—source data 1. [file elife-74277-fig7-data1.xlsx]

## Sheet: Figure 7B
Experiment repeat	Cell	Condition	Raw intensity	Normalized intensity	Cell	Condition	Raw intensity	Normalized intensity	Cell	Condition	Raw intensity	Normalized intensity	Cell	Condition	Raw intensity	Normalized intensity
repeat 1 (6/28/2020)	1	WT/TTX	199501	1.14928	1	WT/TTX/FST	456100	2.62749	1	AA/TTX	365572	2.10598	1	AA/TTX/FST	220532	1.27044
repeat 1 (6/28/2020)	2	WT/TTX	167807	0.966702	2	WT/TTX/FST	97300.2	0.560525	2	AA/TTX	29596	0.170496	2	AA/TTX/FST	101381	0.584036
repeat 1 (6/28/2020)	3	WT/TTX	153454	0.884015	3	WT/TTX/FST	111776	0.643915	3	AA/TTX	235349	1.3558	3	AA/TTX/FST	204961	1.18073
repeat 1 (6/28/2020)									4	AA/TTX	114531	0.65979	4	AA/TTX/FST	70338.8	0.405206
repeat 1 (6/28/2020)													5	AA/TTX/FST	115182	0.663536
repeat 1 (6/28/2020)													6	AA/TTX/FST	96789.3	0.557582
repeat 2 (6/29/2020)	4	WT/TTX	174785	1.15324	4	WT/TTX/FST	148980	0.982978	5	AA/TTX	67407.1	0.444757	7	AA/TTX/FST	60873.3	0.401646
repeat 2 (6/29/2020)	5	WT/TTX	188226	1.24193	5	WT/TTX/FST	160489	1.05892	6	AA/TTX	416603	2.74878	8	AA/TTX/FST	139372	0.919589
repeat 2 (6/29/2020)	6	WT/TTX	91667.8	0.60483					7	AA/TTX	57433.8	0.378952
repeat 2 (6/29/2020)									8	AA/TTX	229814	1.51633
repeat 3 (7/6/2020)	7	WT/TTX	130945	0.990474	6	WT/TTX/FST	164499	1.24428	9	AA/TTX	80314.2	0.607501	9	AA/TTX/FST	111297	0.841858
repeat 3 (7/6/2020)	8	WT/TTX	92904.7	0.702736	7	WT/TTX/FST	63298.6	0.478794	10	AA/TTX	34401.8	0.260217	10	AA/TTX/FST	313357	2.37025
repeat 3 (7/6/2020)	9	WT/TTX	98750	0.74695	8	WT/TTX/FST	78309.9	0.59234	11	AA/TTX	109076	0.825058	11	AA/TTX/FST	69844.4	0.528307
repeat 3 (7/6/2020)	10	WT/TTX	187385	1.41739	9	WT/TTX/FST	78055.9	0.590419	12	AA/TTX	112855	0.853638	12	AA/TTX/FST	91279.9	0.690446
repeat 3 (7/6/2020)	11	WT/TTX	166467	1.25917	10	WT/TTX/FST	110650	0.836962	13	AA/TTX	63736	0.482102	13	AA/TTX/FST	127682	0.965793
repeat 3 (7/6/2020)	12	WT/TTX	150601	1.13915					14	AA/TTX	71992	0.544551	14	AA/TTX/FST	156171	1.18128
repeat 3 (7/6/2020)	13	WT/TTX	142641	1.07894					15	AA/TTX	106787	0.80774
repeat 3 (7/6/2020)	14	WT/TTX	87940.6	0.665187
repeat 4 (7/16/2020)	15	WT/TTX	170357	1.01298	11	WT/TTX/FST	122519	0.728525	16	AA/TTX	74555.7	0.443327	15	AA/TTX/FST	136963	0.814414
repeat 4 (7/16/2020)	16	WT/TTX	224937	1.33753	12	WT/TTX/FST	117617	0.69938	17	AA/TTX	127798	0.759918	16	AA/TTX/FST	117108	0.696356
repeat 4 (7/16/2020)	17	WT/TTX	159542	0.948676	13	WT/TTX/FST	135458	0.805469	18	AA/TTX	100317	0.596512	17	AA/TTX/FST	70783.1	0.420894
repeat 4 (7/16/2020)	18	WT/TTX	117857	0.700808	14	WT/TTX/FST	80918.5	0.481161	19	AA/TTX	93994.4	0.558914	18	AA/TTX/FST	99987.5	0.59455
repeat 4 (7/16/2020)					15	WT/TTX/FST	128708	0.765328	20	AA/TTX	80711.3	0.479929	19	AA/TTX/FST	104971	0.624183
repeat 4 (7/16/2020)					16	WT/TTX/FST	69027.2	0.410453	21	AA/TTX	129790	0.771765	20	AA/TTX/FST	66818.3	0.397318
repeat 4 (7/16/2020)					17	WT/TTX/FST	118594	0.705189	22	AA/TTX	89938.2	0.534795
repeat 5 (9/7/2020)	19	WT/TTX	125368	0.964962	18	WT/TTX/FST	116742	0.898566	23	AA/TTX	94409.8	0.726676	21	AA/TTX/FST	312446	2.40491
repeat 5 (9/7/2020)	20	WT/TTX	119482	0.91966	19	WT/TTX/FST	87794	0.675754	24	AA/TTX	157075	1.20901	22	AA/TTX/FST	109851	0.84553
repeat 5 (9/7/2020)	21	WT/TTX	136932	1.05397	20	WT/TTX/FST	100872	0.776419	25	AA/TTX	211974	1.63158	23	AA/TTX/FST	189700	1.46013
repeat 5 (9/7/2020)	22	WT/TTX	137897	1.0614	21	WT/TTX/FST	50681.2	0.390096	26	AA/TTX	88029.4	0.677566	24	AA/TTX/FST	201715	1.55261
repeat 5 (9/7/2020)					22	WT/TTX/FST	62597.7	0.481817					25	AA/TTX/FST	126485	0.973563
repeat 5 (9/7/2020)					23	WT/TTX/FST	97227.7	0.748366

## Sheet: Figure 7C
Experiment repeat	Cell	Condition	Raw intensity	Normalized intensity	Cell	Condition	Raw intensity	Normalized intensity	Cell	Condition	Raw intensity	Normalized intensity	Cell	Condition	Raw intensity	Normalized intensity
repeat 1 (6/28/2020)	1	WT/TTX	195545	1.57505	1	WT/TTX/FST	258837	2.08485	1	AA/TTX	122411	0.985985	1	AA/TTX/FST	183517	1.47817
repeat 1 (6/28/2020)	2	WT/TTX	81996.9	0.660459	2	WT/TTX/FST	64080.7	0.51615	2	AA/TTX	56173	0.452456	2	AA/TTX/FST	208500	1.6794
repeat 1 (6/28/2020)	3	WT/TTX	94912.3	0.764489	3	WT/TTX/FST	121699	0.980244	3	AA/TTX	50972.9	0.410571	3	AA/TTX/FST	128593	1.03578
repeat 1 (6/28/2020)									4	AA/TTX	174047	1.40189	4	AA/TTX/FST	77930.8	0.627708
repeat 1 (6/28/2020)													5	AA/TTX/FST	56130.7	0.452115
repeat 1 (6/28/2020)													6	AA/TTX/FST	124267	1.00093
repeat 2 (6/29/2020)	4	WT/TTX	66949.5	0.536326	4	WT/TTX/FST	77161.5	0.618133	5	AA/TTX	166659	1.33509	7	AA/TTX/FST	169894	1.36101
repeat 2 (6/29/2020)	5	WT/TTX	237360	1.90146	5	WT/TTX/FST	259124	2.07581	6	AA/TTX	383328	3.0708	8	AA/TTX/FST	323222	2.5893
repeat 2 (6/29/2020)	6	WT/TTX	70180.8	0.562211					7	AA/TTX	75982.7	0.608689
repeat 2 (6/29/2020)									8	AA/TTX	136596	1.09426
repeat 3 (7/6/2020)	7	WT/TTX	76452.5	0.336674	6	WT/TTX/FST	168935	0.74394	9	AA/TTX	142924	0.629392	9	AA/TTX/FST	152844	0.673078
repeat 3 (7/6/2020)	8	WT/TTX	113109	0.498099	7	WT/TTX/FST	48966.9	0.215635	10	AA/TTX	106756	0.470121	10	AA/TTX/FST	314252	1.38387
repeat 3 (7/6/2020)	9	WT/TTX	298102	1.31275	8	WT/TTX/FST	205500	0.904958	11	AA/TTX	183992	0.810243	11	AA/TTX/FST	97879.1	0.43103
repeat 3 (7/6/2020)	10	WT/TTX	333650	1.46929	9	WT/TTX/FST	51138	0.225196	12	AA/TTX	65180	0.287033	12	AA/TTX/FST	155573	0.685094
repeat 3 (7/6/2020)	11	WT/TTX	260136	1.14556	10	WT/TTX/FST	54717.6	0.24096	13	AA/TTX	65385.1	0.287936	13	AA/TTX/FST	108266	0.47677
repeat 3 (7/6/2020)	12	WT/TTX	262205	1.15467					14	AA/TTX	141399	0.622678	14	AA/TTX/FST	266313	1.17276
repeat 3 (7/6/2020)	13	WT/TTX	323318	1.4238					15	AA/TTX	291814	1.28506
repeat 3 (7/6/2020)	14	WT/TTX	149682	0.659156
repeat 4 (7/16/2020)	15	WT/TTX	141190	0.593828	11	WT/TTX/FST	216281	0.909651	16	AA/TTX	78789.5	0.331379	15	AA/TTX/FST	91581.9	0.385182
repeat 4 (7/16/2020)	16	WT/TTX	298879	1.25705	12	WT/TTX/FST	177073	0.744747	17	AA/TTX	194950	0.819938	16	AA/TTX/FST	110071	0.462943
repeat 4 (7/16/2020)	17	WT/TTX	247084	1.03921	13	WT/TTX/FST	239626	1.00784	18	AA/TTX	150198	0.631716	17	AA/TTX/FST	78949.6	0.332052
repeat 4 (7/16/2020)	18	WT/TTX	263896	1.10991	14	WT/TTX/FST	74716.2	0.314247	19	AA/TTX	134343	0.565032	18	AA/TTX/FST	156352	0.657598
repeat 4 (7/16/2020)					15	WT/TTX/FST	360075	1.51443	20	AA/TTX	174076	0.732144	19	AA/TTX/FST	128951	0.542354
repeat 4 (7/16/2020)					16	WT/TTX/FST	71701	0.301566	21	AA/TTX	175348	0.737491	20	AA/TTX/FST	85629.9	0.360149
repeat 4 (7/16/2020)					17	WT/TTX/FST	60249.6	0.253403	22	AA/TTX	115463	0.485623
repeat 5 (9/7/2020)	19	WT/TTX	126548	0.831116	18	WT/TTX/FST	69394.2	0.455752	23	AA/TTX	95260.5	0.625631	21	AA/TTX/FST	244638	1.60668
repeat 5 (9/7/2020)	20	WT/TTX	125171	0.822067	19	WT/TTX/FST	94801.3	0.622615	24	AA/TTX	164433	1.07993	22	AA/TTX/FST	141758	0.931007
repeat 5 (9/7/2020)	21	WT/TTX	131486	0.863545	20	WT/TTX/FST	58095.9	0.38155	25	AA/TTX	130315	0.855855	23	AA/TTX/FST	58208	0.382285
repeat 5 (9/7/2020)	22	WT/TTX	225848	1.48327	21	WT/TTX/FST	71666	0.470672	26	AA/TTX	73474.4	0.482549	24	AA/TTX/FST	149681	0.983043
repeat 5 (9/7/2020)					22	WT/TTX/FST	59873	0.39322					25	AA/TTX/FST	59502.7	0.390788
repeat 5 (9/7/2020)					23	WT/TTX/FST	73023.3	0.479586

## Sheet: Figure 7D
Experiment repeat	Cell	Condition	Count	Length	Density	Normalized density	Cell	Condition	Count	Length	Density	Normalized density	Cell	Condition	Count	Length	Density	Normalized density	Cell	Condition	Count	Length	Density	Normalized density
repeat 1 (6/28/2020)	1	WT/TTX	35	502.736	0.0696191	0.821424	1	WT/TTX/FST	26	244.929	0.106153	1.25248	1	AA/TTX	18	246.387	0.0730557	0.861972	1	AA/TTX/FST	36	619.011	0.0581573	0.686189
repeat 1 (6/28/2020)	2	WT/TTX	28	588.06	0.0476142	0.561792	2	WT/TTX/FST	17	349.885	0.0485874	0.573275	2	AA/TTX	3	303.303	0.00989111	0.116704	2	AA/TTX/FST	25	365.856	0.068333	0.806249
repeat 1 (6/28/2020)	3	WT/TTX	73	532.734	0.137029	1.61678	3	WT/TTX/FST	64	599.072	0.106832	1.26049	3	AA/TTX	40	217.833	0.183627	2.16659	3	AA/TTX/FST	18	348.716	0.0516179	0.609031
repeat 1 (6/28/2020)													4	AA/TTX	13	347.57	0.0374025	0.441306	4	AA/TTX/FST	28	509.375	0.0549694	0.648574
repeat 1 (6/28/2020)																			5	AA/TTX/FST	6	301.347	0.0199106	0.234922
repeat 1 (6/28/2020)																			6	AA/TTX/FST	10	186.063	0.0537453	0.634132
repeat 2 (6/29/2020)	4	WT/TTX	31	277.056	0.111891	1.12513	4	WT/TTX/FST	45	464.4	0.0968993	0.974382	5	AA/TTX	16	438.506	0.0364875	0.366904	7	AA/TTX/FST	3	334.987	0.00895556	0.0900536
repeat 2 (6/29/2020)	5	WT/TTX	115	824.791	0.139429	1.40205	5	WT/TTX/FST	16	424.934	0.0376529	0.378623	6	AA/TTX	38	471.385	0.0806135	0.810618	8	AA/TTX/FST	19	950.457	0.0199904	0.201015
repeat 2 (6/29/2020)	6	WT/TTX	20	425.343	0.0470208	0.472823							7	AA/TTX	6	194.837	0.0307949	0.309662
repeat 2 (6/29/2020)													8	AA/TTX	48	420.633	0.114114	1.14748
repeat 3 (7/6/2020)	7	WT/TTX	22	414.253	0.0531076	0.785996	6	WT/TTX/FST	22	573.047	0.0383913	0.568193	9	AA/TTX	31	438.791	0.0706487	1.0456	9	AA/TTX/FST	20	640.96	0.0312032	0.461809
repeat 3 (7/6/2020)	8	WT/TTX	32	690.012	0.046376	0.686367	7	WT/TTX/FST	10	537.018	0.0186213	0.275597	10	AA/TTX	5	354.714	0.0140958	0.208619	10	AA/TTX/FST	25	282.032	0.0886424	1.31191
repeat 3 (7/6/2020)	9	WT/TTX	20	327.68	0.0610351	0.903323	8	WT/TTX/FST	16	376.698	0.0424743	0.628622	11	AA/TTX	19	470.214	0.0404072	0.598028	11	AA/TTX/FST	16	434.607	0.0368149	0.544862
repeat 3 (7/6/2020)	10	WT/TTX	14	627.1	0.022325	0.330411	9	WT/TTX/FST	27	268.286	0.100639	1.48946	12	AA/TTX	12	262.178	0.0457705	0.677405	12	AA/TTX/FST	33	489.996	0.0673474	0.996746
repeat 3 (7/6/2020)	11	WT/TTX	30	391.616	0.0766057	1.13377	10	WT/TTX/FST	50	447.135	0.111823	1.65499	13	AA/TTX	32	436.449	0.073319	1.08512	13	AA/TTX/FST	43	399.425	0.107655	1.5933
repeat 3 (7/6/2020)	12	WT/TTX	43	385.22	0.111625	1.65205							14	AA/TTX	13	514.196	0.0252822	0.374178	14	AA/TTX/FST	24	518.364	0.0462995	0.685235
repeat 3 (7/6/2020)	13	WT/TTX	47	456.638	0.102926	1.52331							15	AA/TTX	36	459.884	0.0782807	1.15856
repeat 3 (7/6/2020)	14	WT/TTX	32	480.926	0.0665384	0.984771
repeat 4 (7/16/2020)	15	WT/TTX	31	225.244	0.137628	1.41102	11	WT/TTX/FST	17	263.645	0.0644805	0.661078	16	AA/TTX	14	536.658	0.0260874	0.267457	15	AA/TTX/FST	12	527.425	0.0227521	0.233262
repeat 4 (7/16/2020)	16	WT/TTX	32	494.179	0.0647539	0.663881	12	WT/TTX/FST	31	627.298	0.0494183	0.506655	17	AA/TTX	19	438.327	0.0433467	0.444406	16	AA/TTX/FST	18	413.106	0.0435724	0.44672
repeat 4 (7/16/2020)	17	WT/TTX	45	359.373	0.125218	1.28378	13	WT/TTX/FST	31	844.357	0.0367143	0.376409	18	AA/TTX	16	638.815	0.0250464	0.256785	17	AA/TTX/FST	26	482.172	0.0539227	0.552835
repeat 4 (7/16/2020)	18	WT/TTX	36	575.509	0.0625534	0.64132	14	WT/TTX/FST	21	669.37	0.0313728	0.321645	19	AA/TTX	41	345.187	0.118776	1.21774	18	AA/TTX/FST	19	431.168	0.0440664	0.451785
repeat 4 (7/16/2020)							15	WT/TTX/FST	39	658.499	0.0592256	0.607202	20	AA/TTX	17	366.624	0.046369	0.475392	19	AA/TTX/FST	15	422.099	0.0355367	0.364335
repeat 4 (7/16/2020)							16	WT/TTX/FST	8	225.718	0.0354425	0.363369	21	AA/TTX	21	346.106	0.0606751	0.622063	20	AA/TTX/FST	18	592.901	0.0303592	0.311254
repeat 4 (7/16/2020)							17	WT/TTX/FST	5	278.796	0.0179343	0.183869	22	AA/TTX	30	551.646	0.0543827	0.557551
repeat 5 (9/7/2020)	19	WT/TTX	46	946.207	0.0486152	0.708459	18	WT/TTX/FST	28	463.769	0.0603749	0.879832	23	AA/TTX	39	750.75	0.051948	0.757028	21	AA/TTX/FST	51	630.421	0.0808983	1.17891
repeat 5 (9/7/2020)	20	WT/TTX	57	488.879	0.116593	1.69909	19	WT/TTX/FST	22	755.927	0.0291033	0.424117	24	AA/TTX	37	547.38	0.0675948	0.985045	22	AA/TTX/FST	71	971.217	0.0731041	1.06533
repeat 5 (9/7/2020)	21	WT/TTX	34	562.334	0.0604623	0.881104	20	WT/TTX/FST	20	766.146	0.0261047	0.380418	25	AA/TTX	45	428.792	0.104946	1.52936	23	AA/TTX/FST	10	330.984	0.030213	0.440287
repeat 5 (9/7/2020)	22	WT/TTX	25	512.156	0.0488133	0.711346	21	WT/TTX/FST	9	699.136	0.012873	0.187596	26	AA/TTX	36	688.862	0.0522601	0.761576	24	AA/TTX/FST	44	405.593	0.108483	1.5809
repeat 5 (9/7/2020)							22	WT/TTX/FST	28	1078.7	0.0259571	0.378268							25	AA/TTX/FST	33	559.931	0.0589359	0.858861
repeat 5 (9/7/2020)							23	WT/TTX/FST	31	826.11	0.0375252	0.546848
