# Supplementary material for: A bidirectional switch in the Shank3 phosphorylation state biases synapses toward up- or downscaling
Source: eLife journal article supplement (doi:10.7554/elife.74277), 2022-04-26
Supplement: supp [file elife-74277-supp-v1.zip]

Uncropped Western blots used in Figure 4F, G

F

● ● TTX 1 hr  
● ● OKA (50 nM)

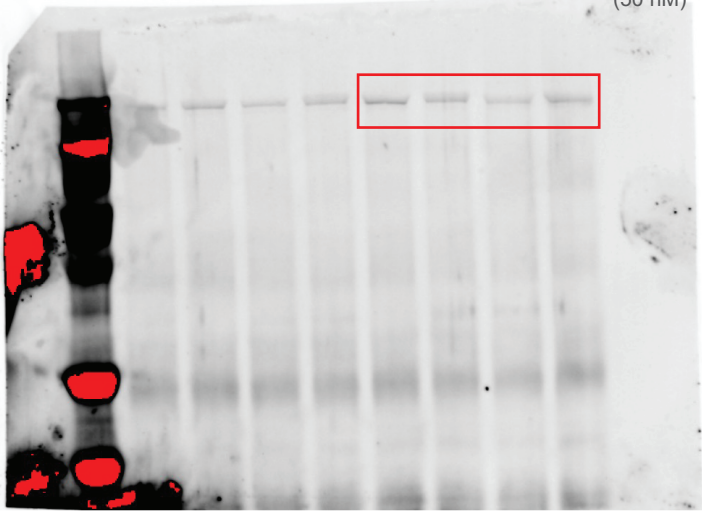

IB: anti-pS1615

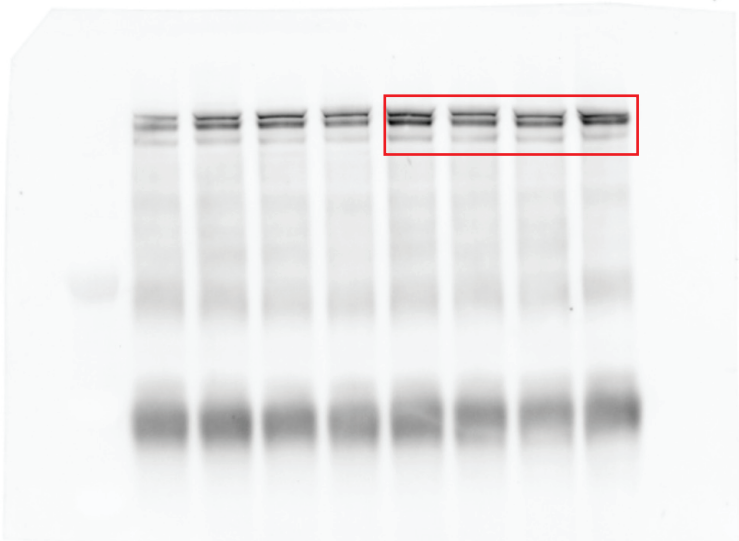

IB: anti-Shank3

G

● ● TTX 24 hr  
● ● OKA (50 nM)

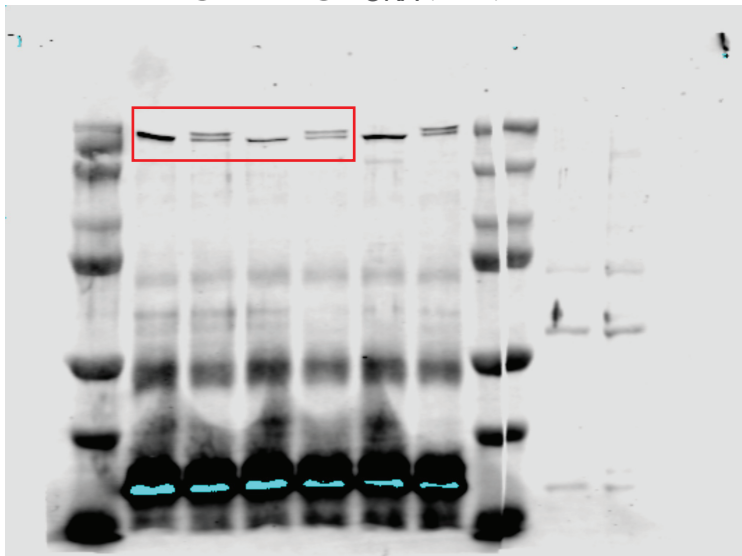

IB: anti-pS1615

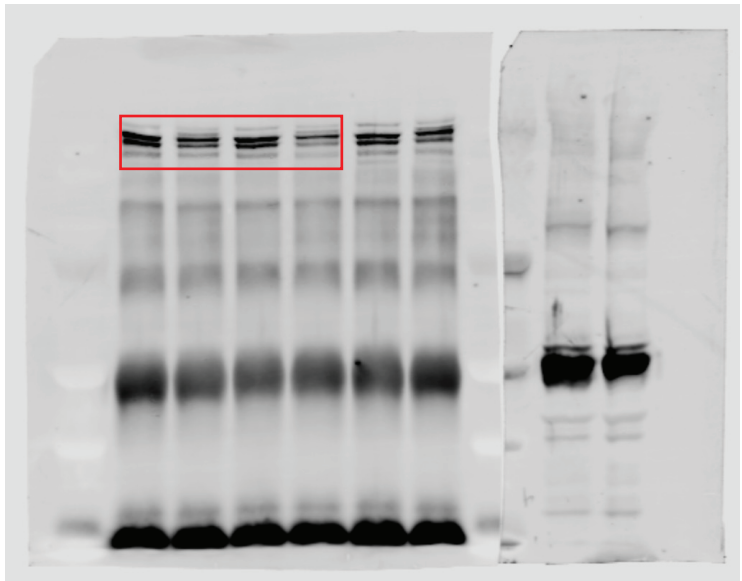

IB: anti-Shank3
