# Supplementary material for: A bidirectional switch in the Shank3 phosphorylation state biases synapses toward up- or downscaling
Source: eLife journal article supplement (doi:10.7554/elife.74277), 2022-04-26
Supplement: supp [file elife-74277-supp-v1.zip]

## Uncropped Western blots used in Figure 2

D

10 min  
Un TTX PTX

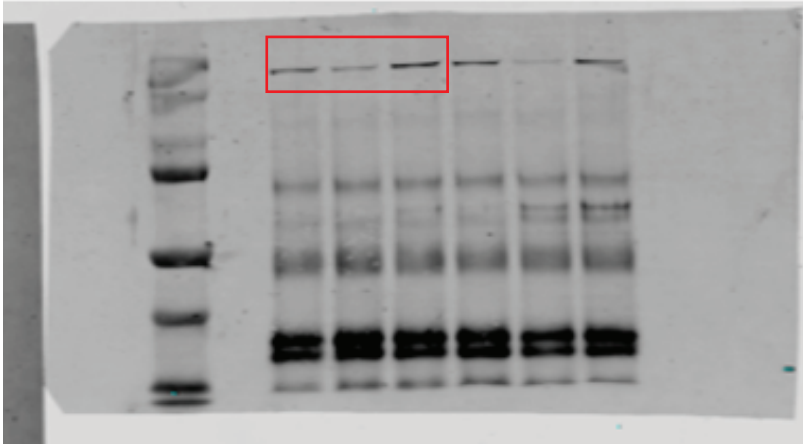

IB: anti-pS1615

E

24 hr  
Un TTXPTX

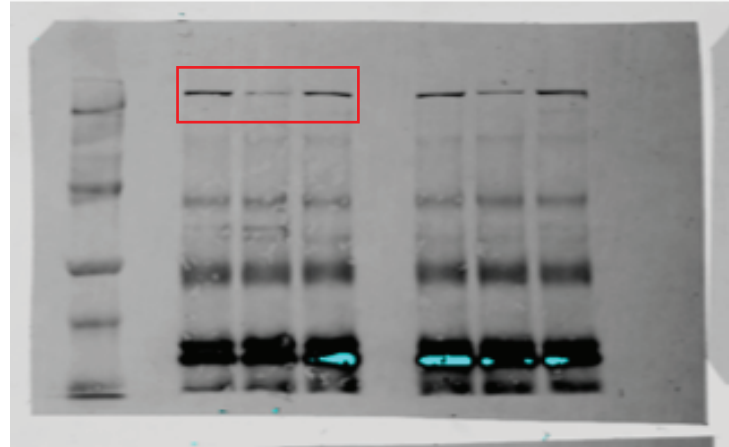

IB: anti-pS1615

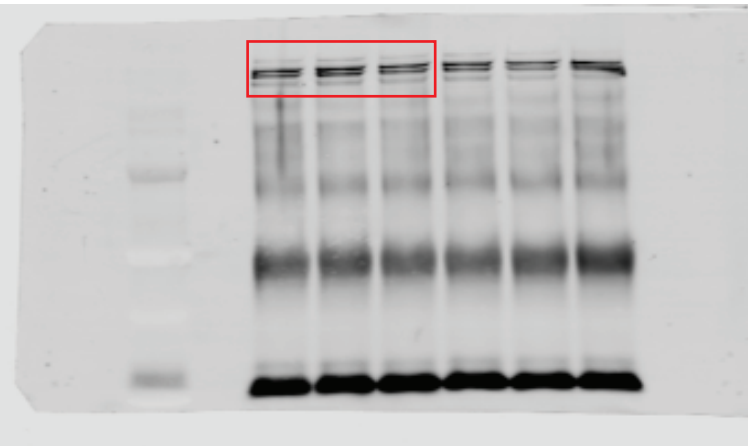

IB: anti-Shank3

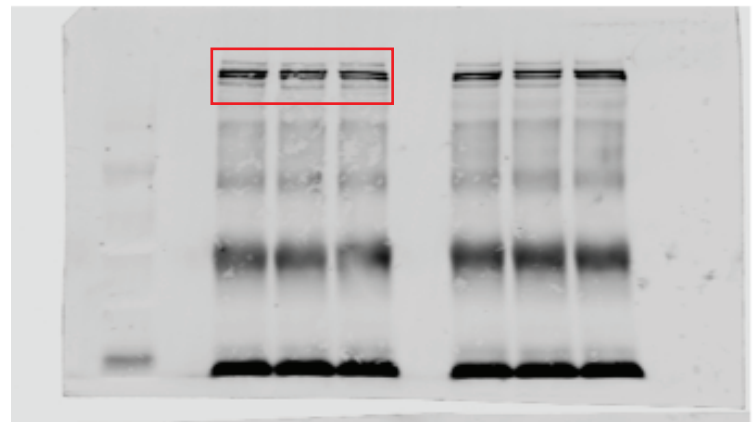

IB: anti-Shank3
