# Supplementary figures and images for: A bidirectional switch in the Shank3 phosphorylation state biases synapses toward up- or downscaling
Source: eLife journal article supplement (doi:10.7554/elife.74277), 2022-04-26

Uncropped Western blots used in Figure 4B

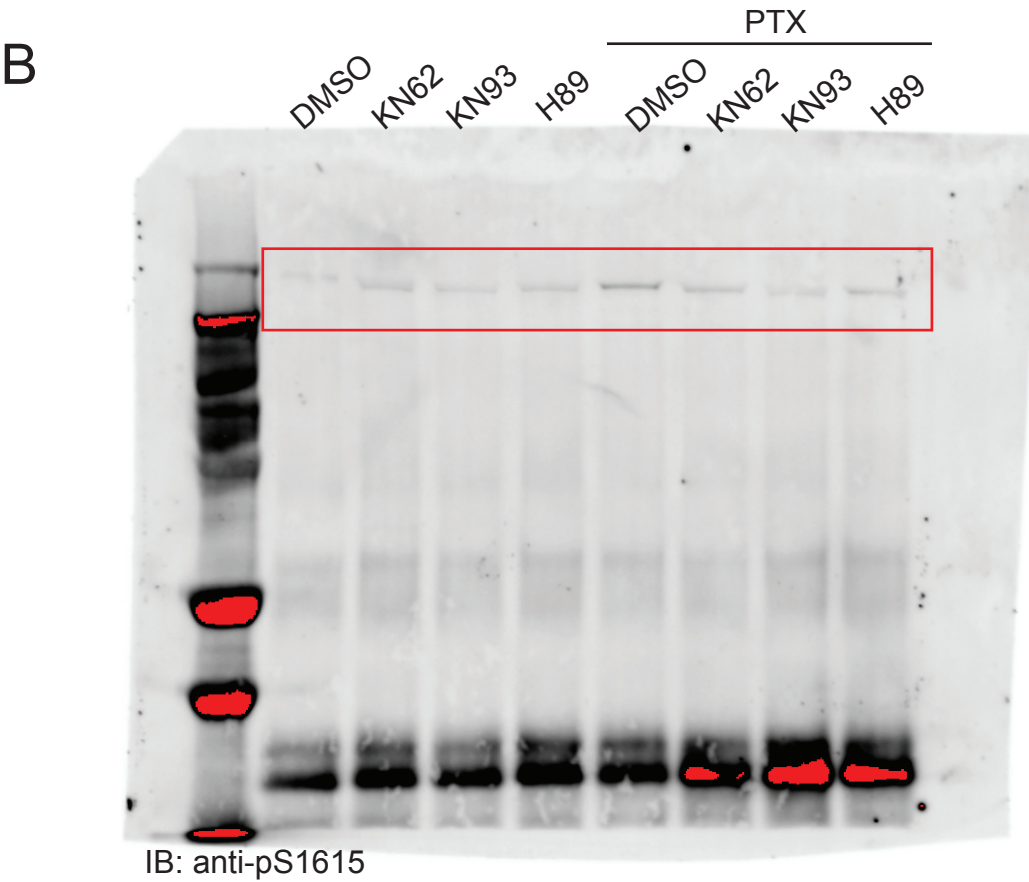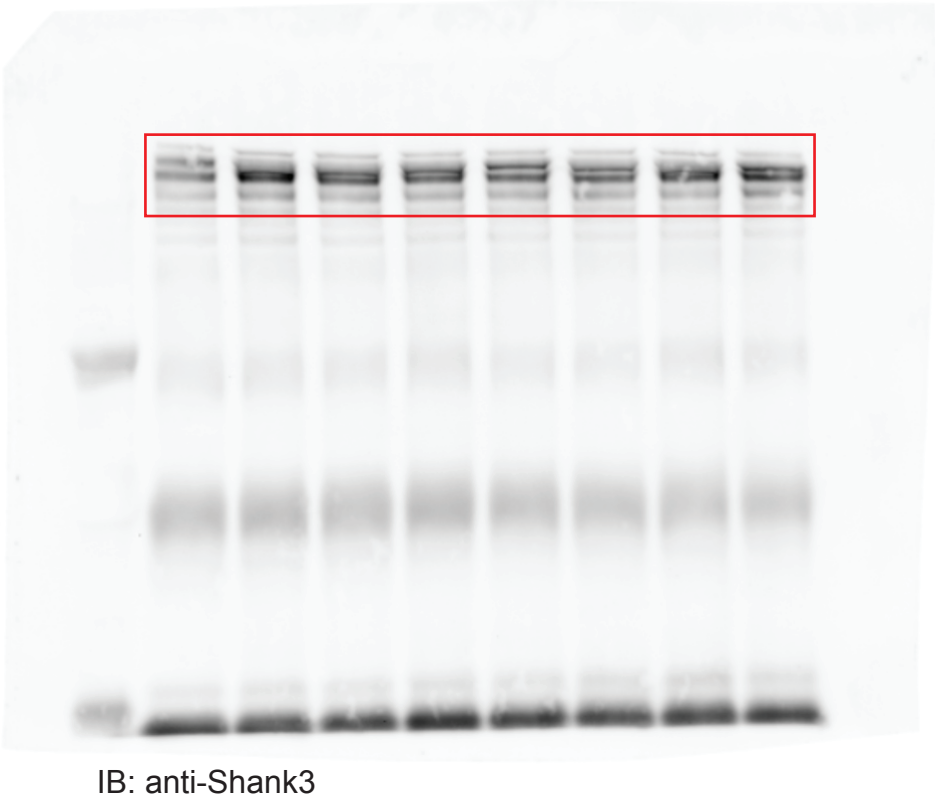

Supplement: supp [file elife-74277-supp-v1.zip]

Figure 4 — figure supplement 1

A

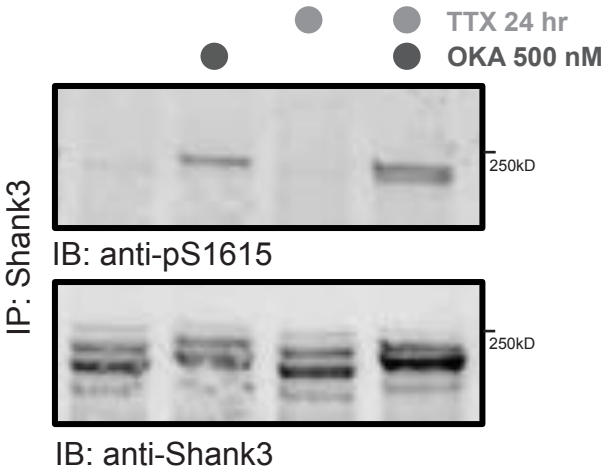

B

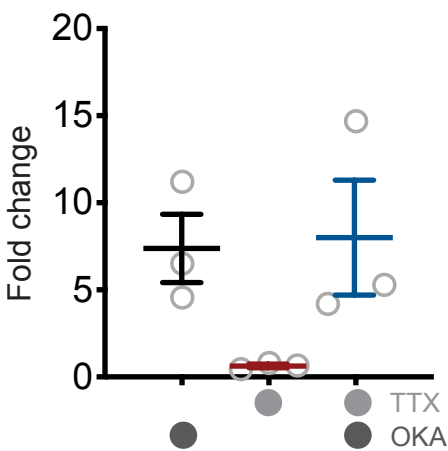

Supplement: supp [file elife-74277-supp-v1.zip]

Figure 2 — figure supplement 1

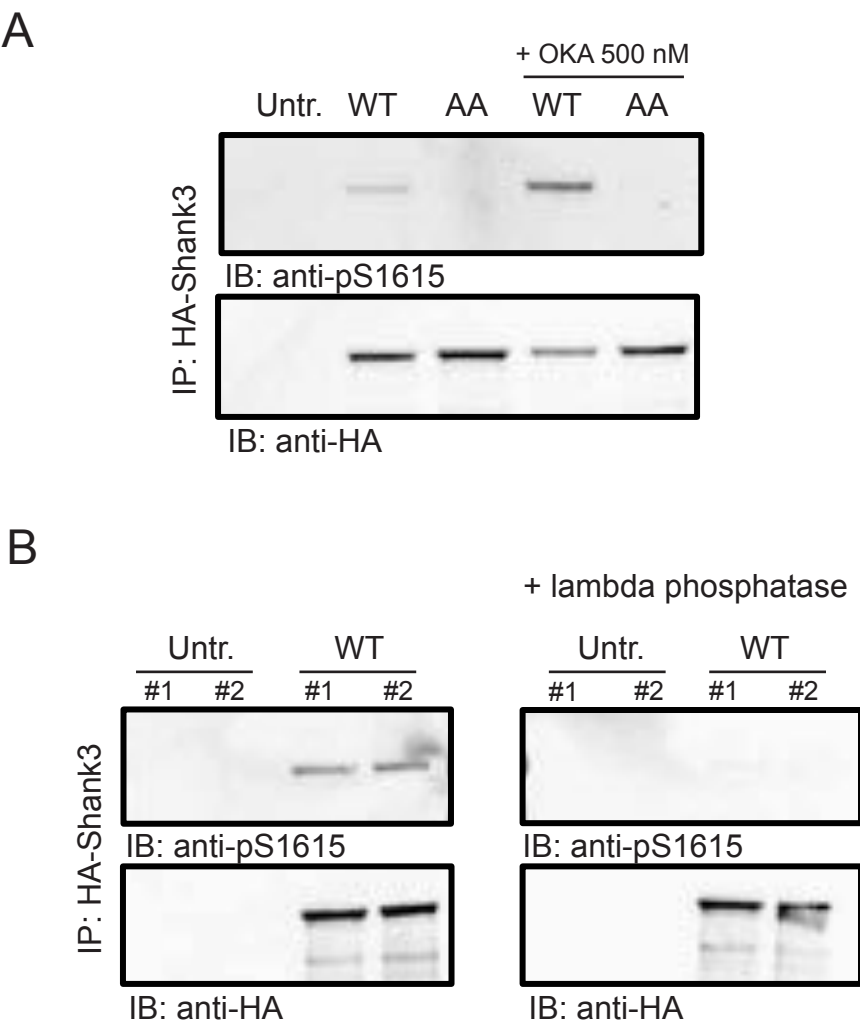

Supplement: supp [file elife-74277-supp-v1.zip]

Figure 6 — figure supplement 1

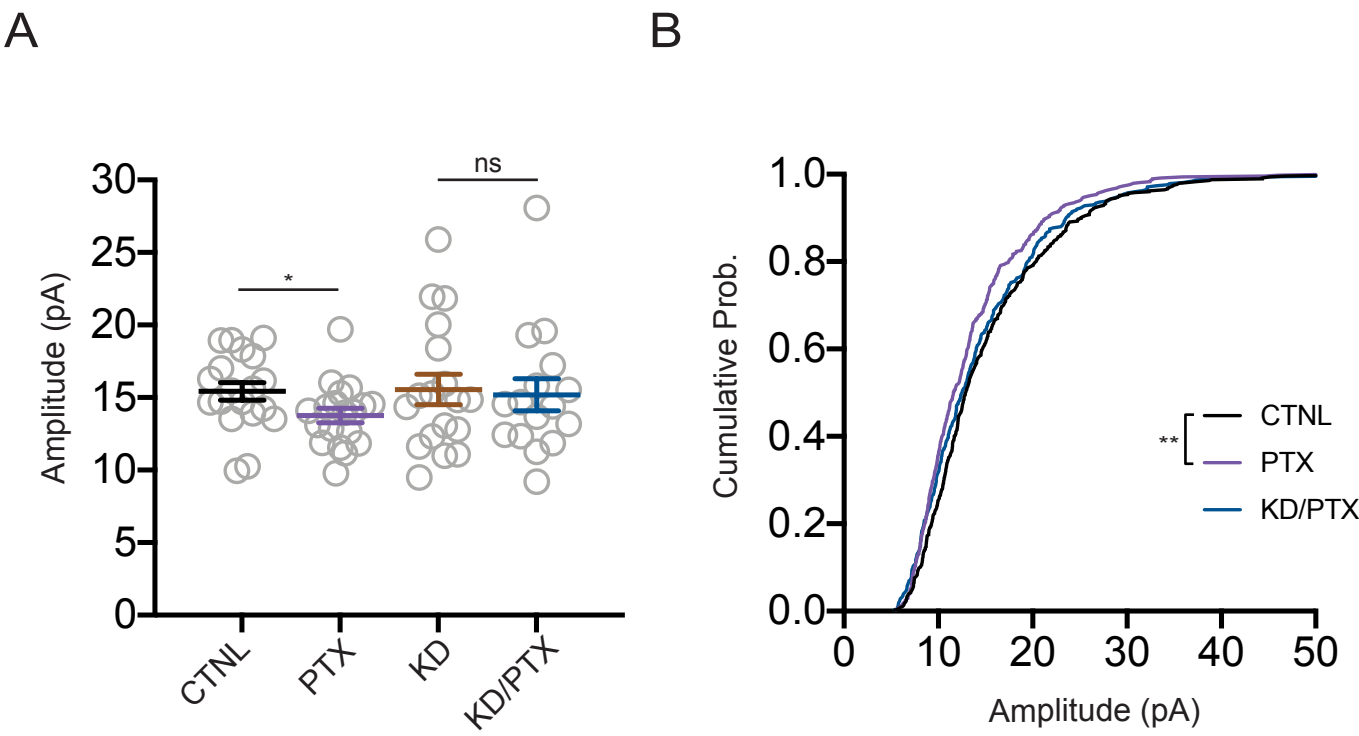

Supplement: supp [file elife-74277-supp-v1.zip]

**Figure 6 — figure supplement 2**

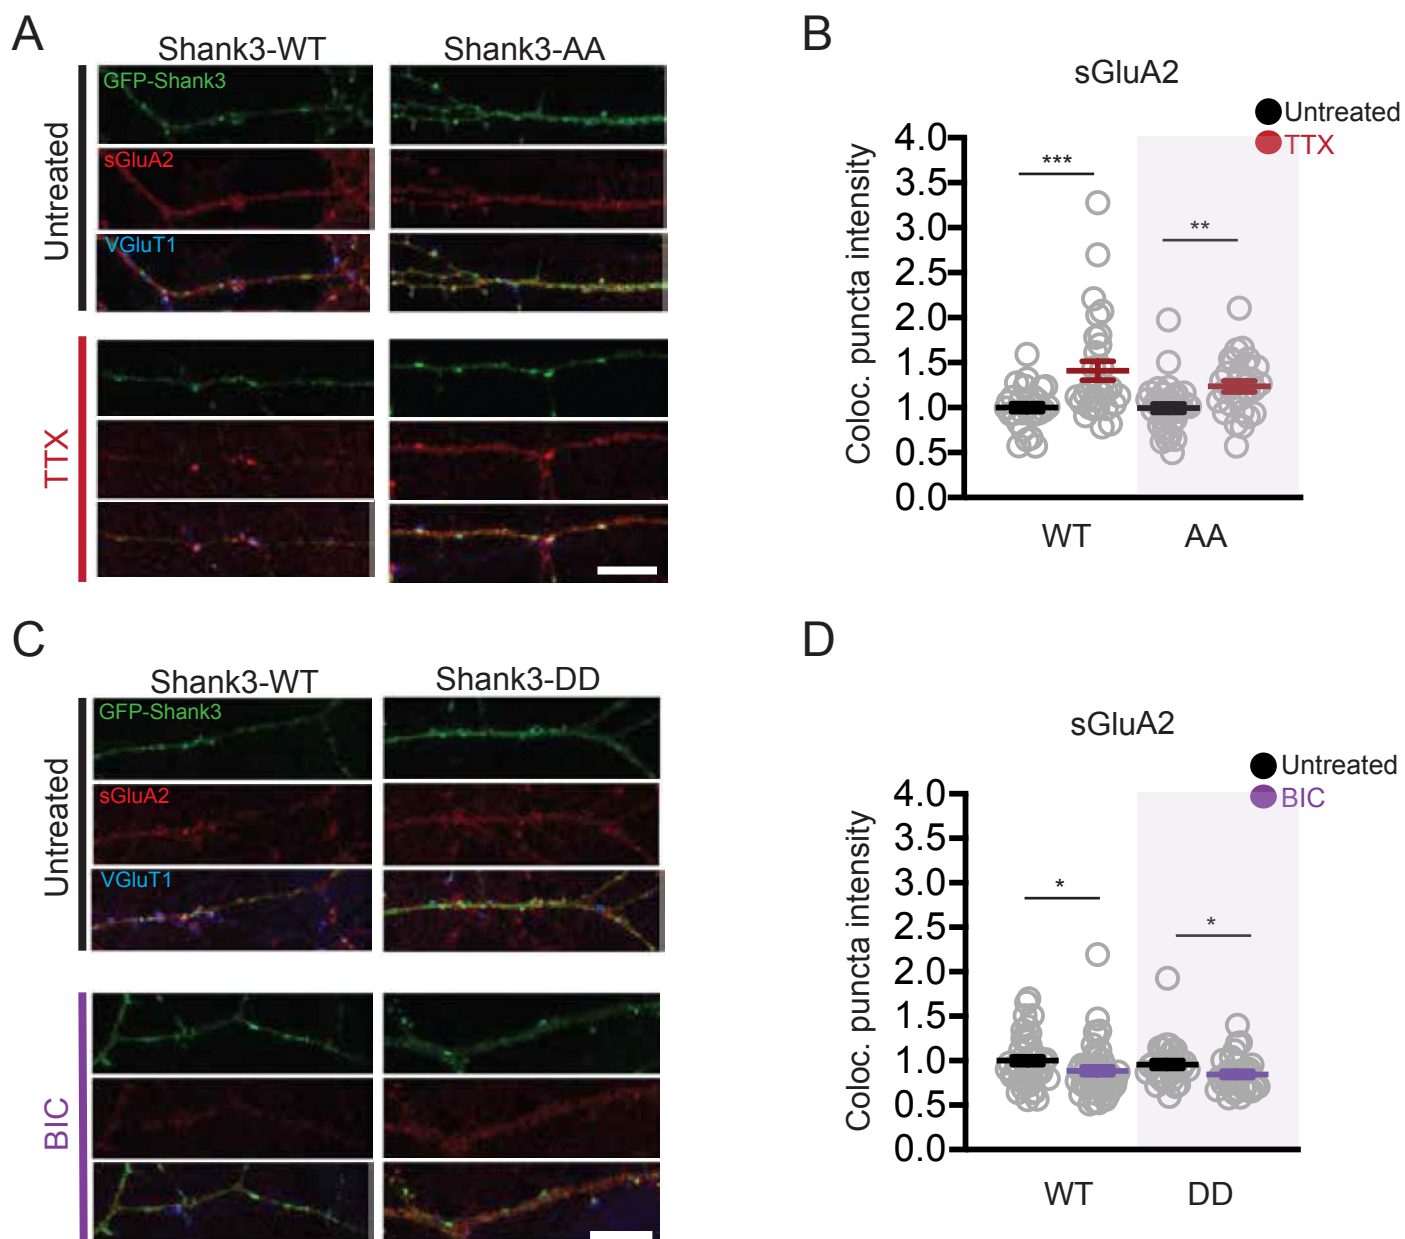

Supplement: supp [file elife-74277-supp-v1.zip]

# Figure 1 — figure supplement 1

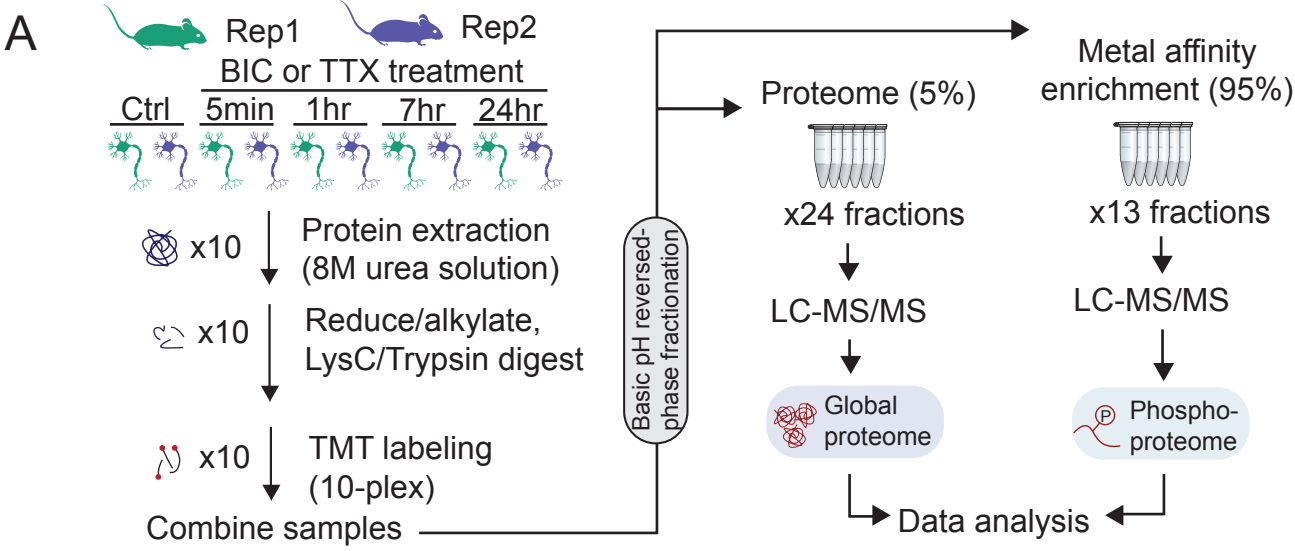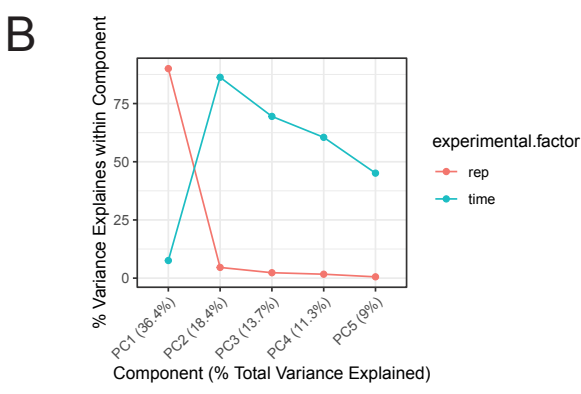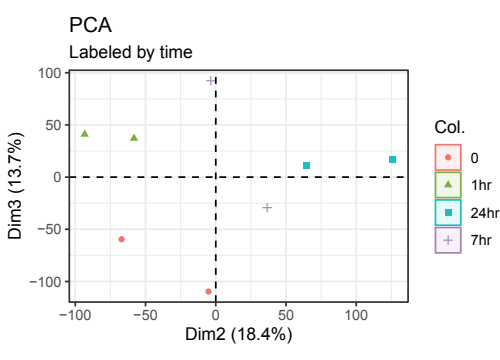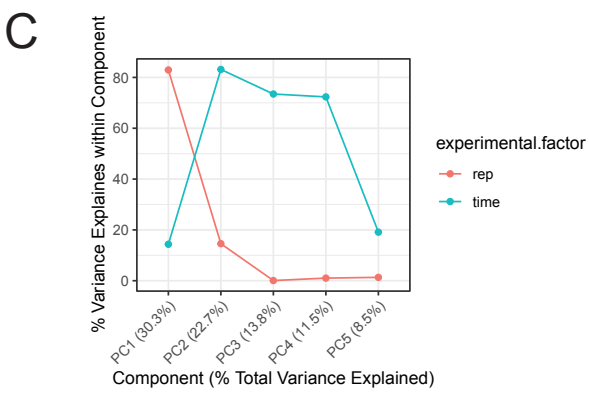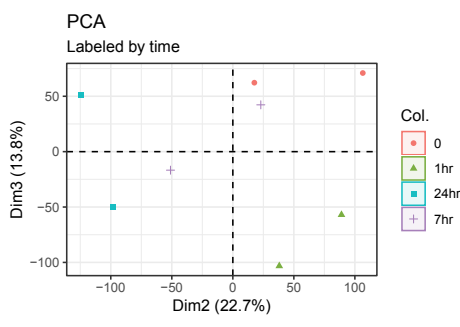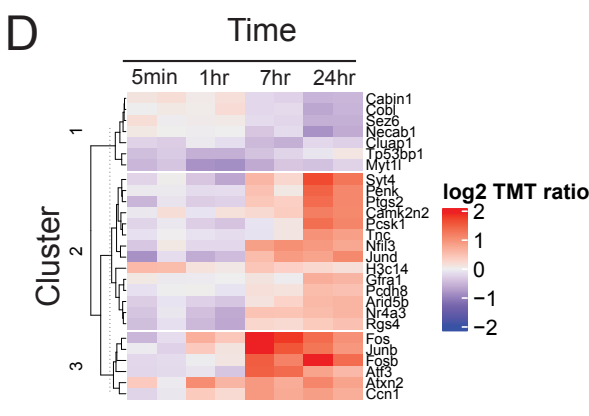

Supplement: supp [file elife-74277-supp-v1.zip]

Uncropped Western blots used in  
Figure 2 — figure supplement 1

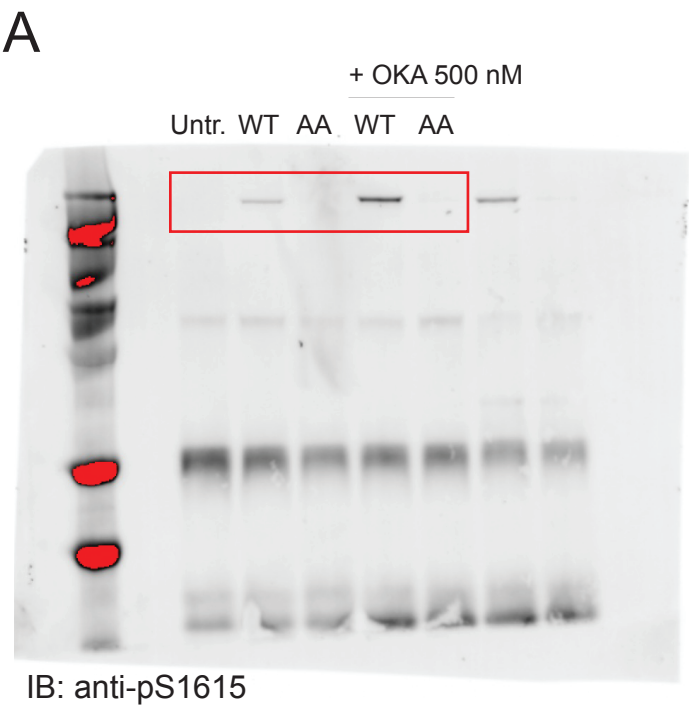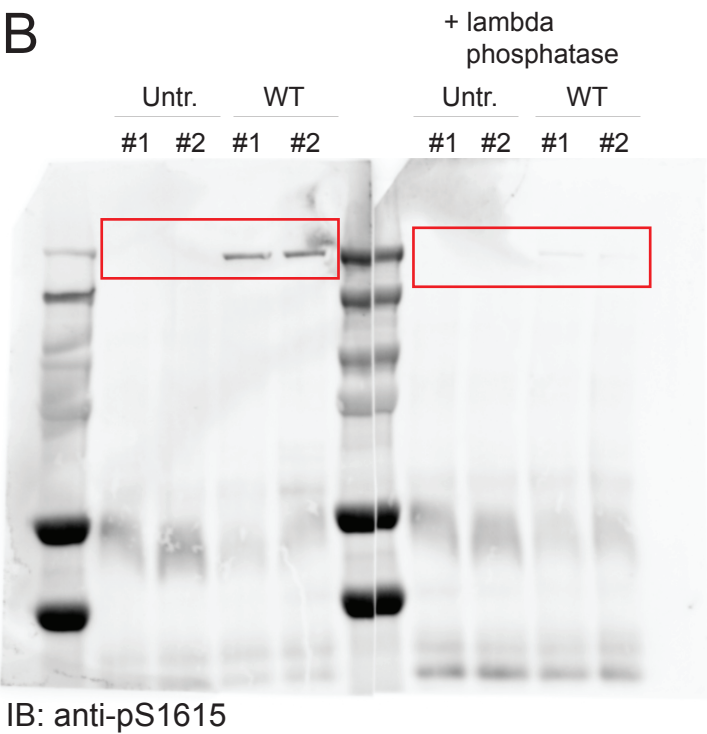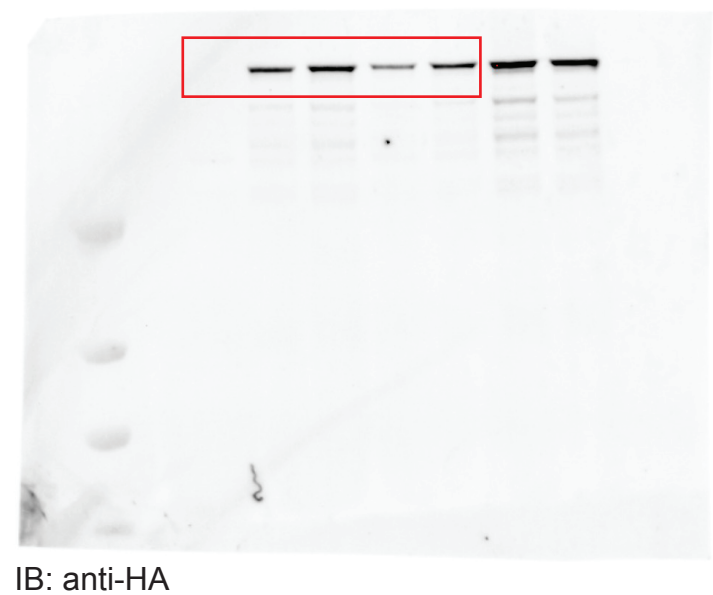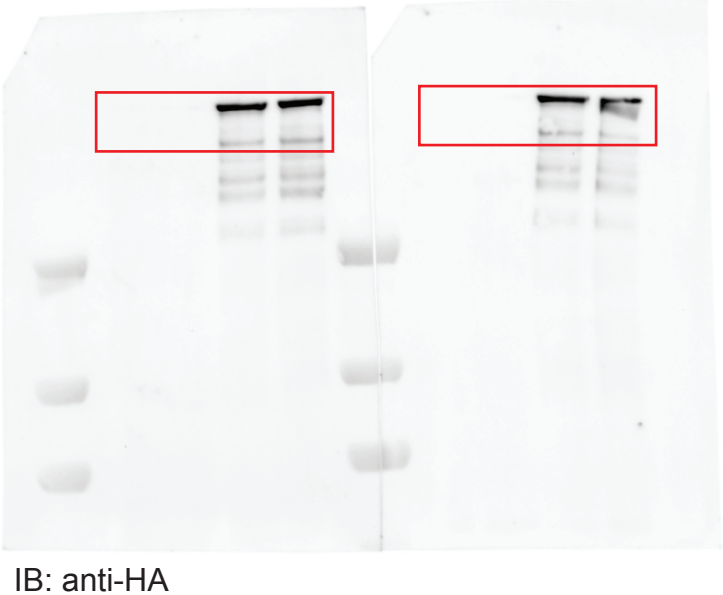

Supplement: supp [file elife-74277-supp-v1.zip]

Figure 5 — figure supplement 1

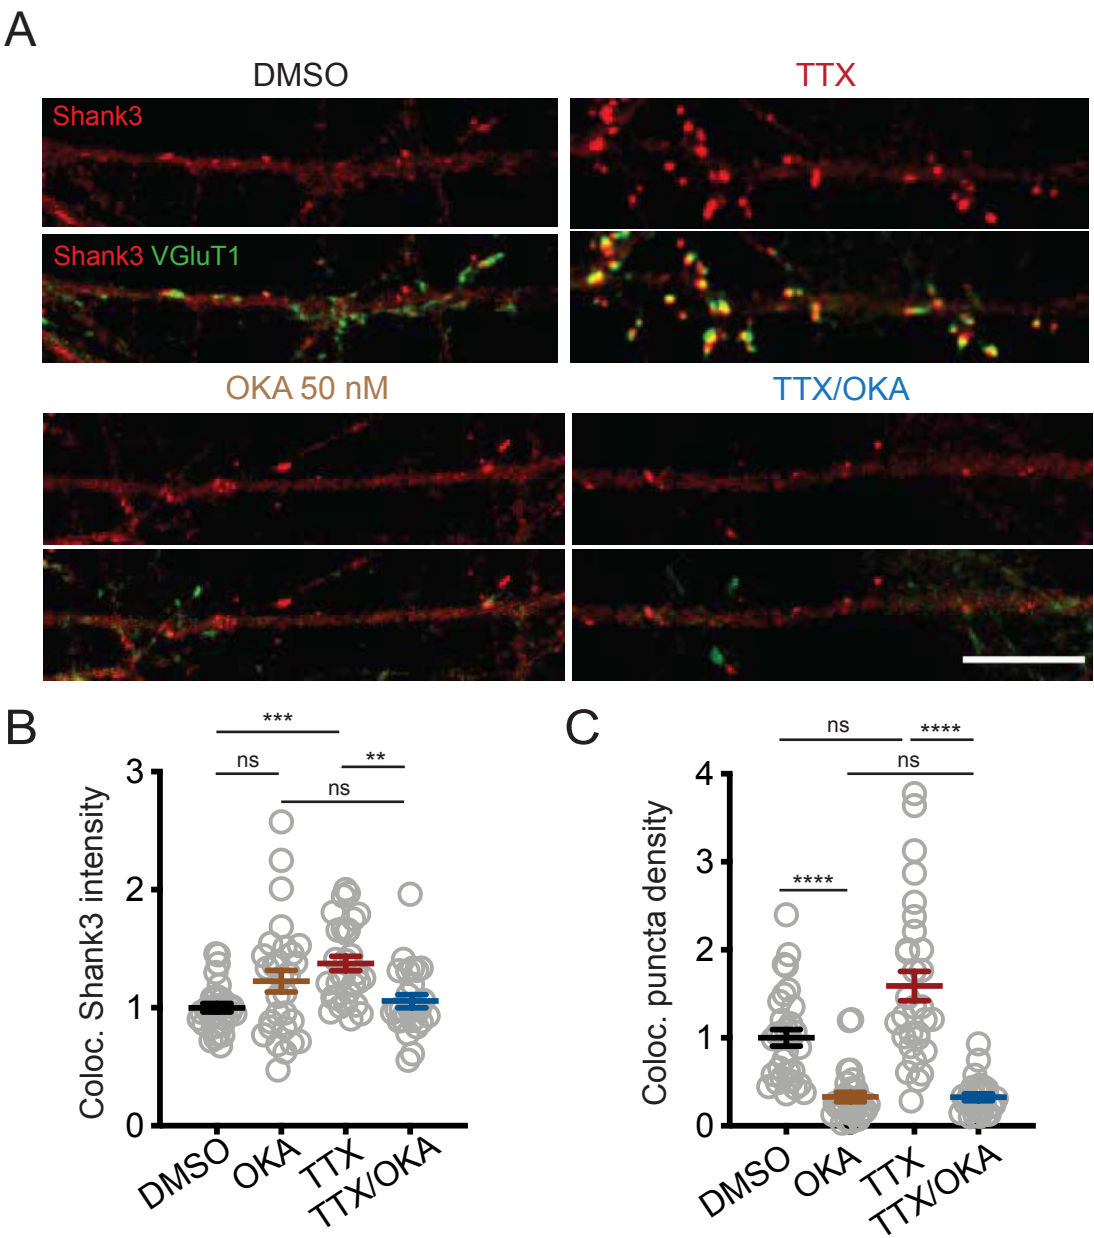

Supplement: supp [file elife-74277-supp-v1.zip]

Uncropped Western blots used in  
Figure 4 — figure supplement 1

A

● ● ● TTX 24 hr  
● ● ● OKA (500 nM)

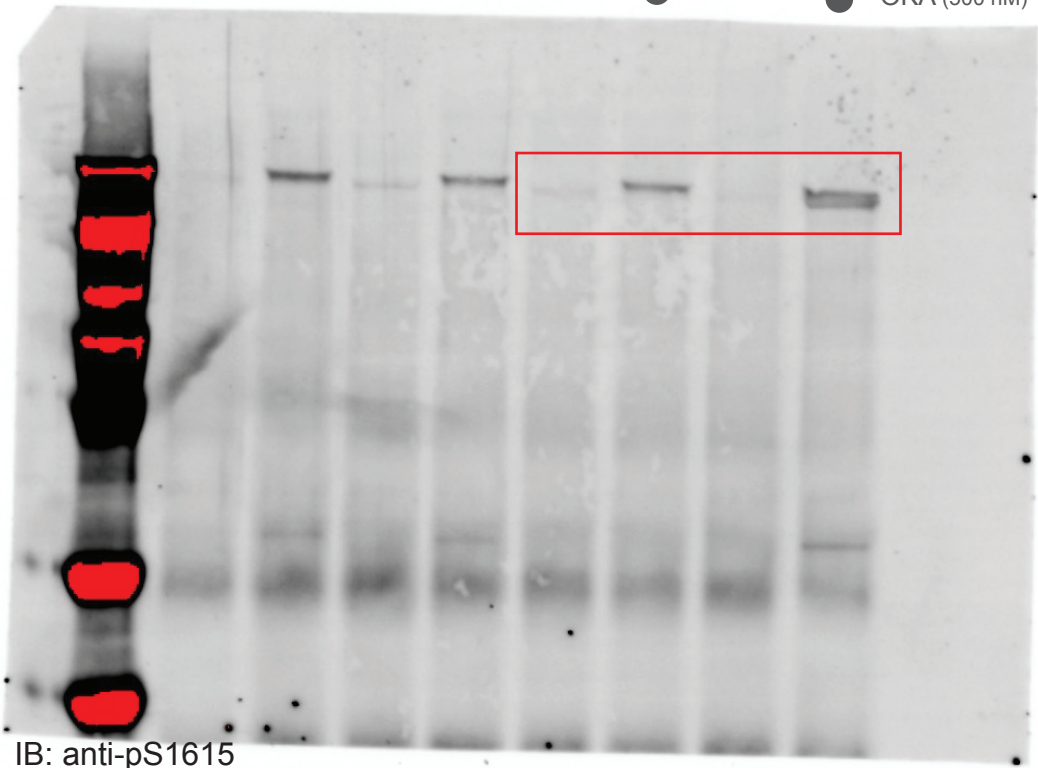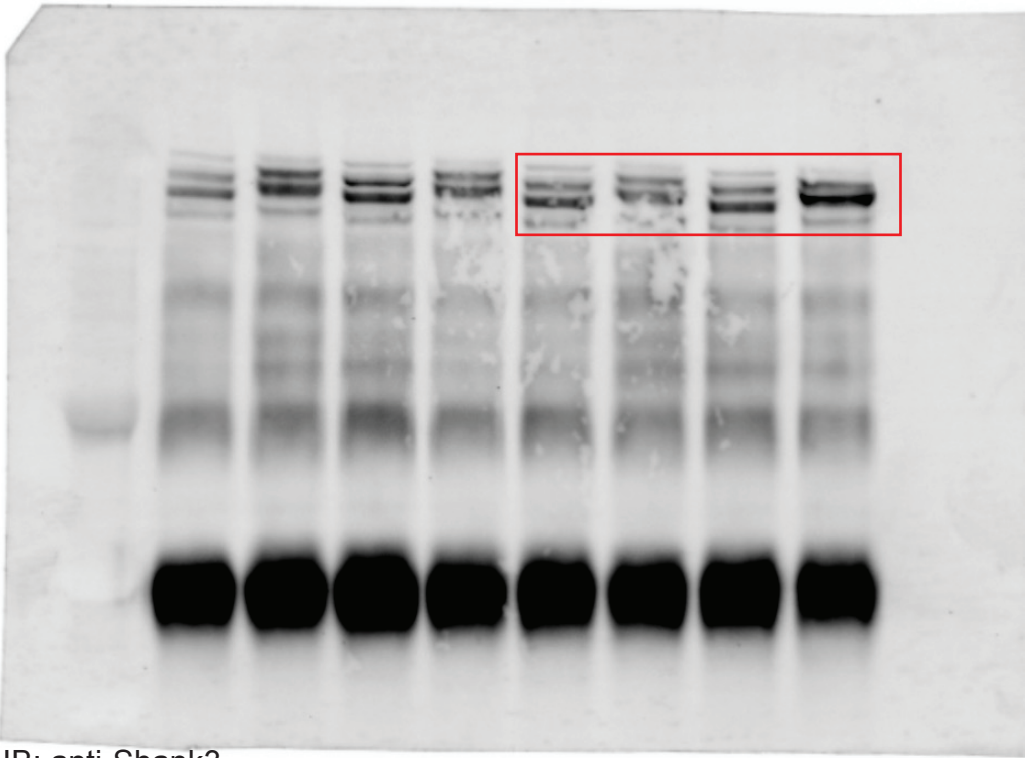

Supplement: supp [file elife-74277-supp-v1.zip]
